# Supplementary material for: Streamlined spatial and environmental expression signatures characterize the minimalist duckweedWolffia australiana
Source: HighWire-hosted journal article supplement (doi:10.1101/gr.279091.124), 2024-07-01
Supplement: Supplemental__Information.pdf [file Supplemental__Information.pdf]

**Streamlined spatial and environmental expression signatures characterize the minimalist duckweed *Wolffia australiana***

Tom Denyer<sup>1</sup>, Pin-Jou Wu<sup>1</sup>, Kelly Colt<sup>2</sup>, Bradley W. Abramson<sup>2,3</sup>, Zhili Pang<sup>4</sup>, Pavel Solansky<sup>1</sup>, Allen Mamerto<sup>2</sup>, Tatsuya Nobori<sup>5</sup>, Joseph R. Ecker<sup>5,6</sup>, Eric Lam<sup>4\*</sup>, Todd P. Michael<sup>2\*</sup>, Marja C.P. Timmermans<sup>1\*</sup>

<sup>1</sup> Center for Plant Molecular Biology, University of Tübingen, Auf der Morgenstelle 32, Tübingen 72076, Germany

<sup>2</sup> Plant Molecular and Cellular Biology Laboratory, The Salk Institute for Biological Studies, La Jolla, California 92037, USA

<sup>3</sup> Applied Sciences and Life Sciences Laboratory, Noblis, Reston, Virginia, 20191 USA

<sup>4</sup> Department of Plant Biology, Rutgers, The State University of New Jersey, New Brunswick, New Jersey 08901, USA

<sup>5</sup> Howard Hughes Medical Institute, The Salk Institute for Biological Studies, La Jolla, California 92037, USA

<sup>6</sup> Genomic Analysis Laboratory, The Salk Institute for Biological Studies, La Jolla, California 92037, USA

**\*Correspondence:**

Eric Lam, [eric.lam@rutgers.edu](mailto:eric.lam@rutgers.edu)

Todd P. Michael, [tmichael@salk.edu](mailto:tmichael@salk.edu)

Marja C.P. Timmermans, [marja.timmermans@uni-tuebingen.de](mailto:marja.timmermans@uni-tuebingen.de)

**This document contains:**

Supplemental Dataset List

Supplemental Figures S1 to S5

Supplemental Text 'Circadian and time of day control of biological processes'

Supplemental Interactive 3D UMAPs S1 to S3

Supplemental Tables S1 to S5

## SUPPLEMENTAL DATASET LIST

**Supplemental Dataset S1.** Differential expressed genes for dusk Superclusters with enriched GO terms

**Supplemental Dataset S2.** Above and below water differential expressed genes with enriched GO terms

**Supplemental Dataset S3.** Differential expressed genes between dusk Superclusters of common tissue types (A vs C, B vs D) with enriched GO terms

**Supplemental Dataset S4.** Differential expressed genes for dusk Clusters with enriched GO terms

**Supplemental Dataset S5.** Stomatal differential expressed genes with enriched GO terms

**Supplemental Dataset S6.** Daughter and mother frond differentially expressed genes with enriched GO terms

**Supplemental Dataset S7.** Differential expressed genes for dawn Superclusters with enriched GO terms

**Supplemental Dataset S8.** Differential expressed genes for dawn Clusters with enriched GO terms

**Supplemental Dataset S9.** Differential expressed genes between dusk vs dawn Superclusters with enriched GO terms

**Supplemental Dataset S10.** *Wolffia* gene orthologues in model plants

**Supplemental Dataset S11.** Genes linked to the cell cycle or circadian clock and their *Wolffia* orthologues

**Supplemental Dataset S12.** Genes referred to by common names

**SUPPLEMENTAL FIGURES**

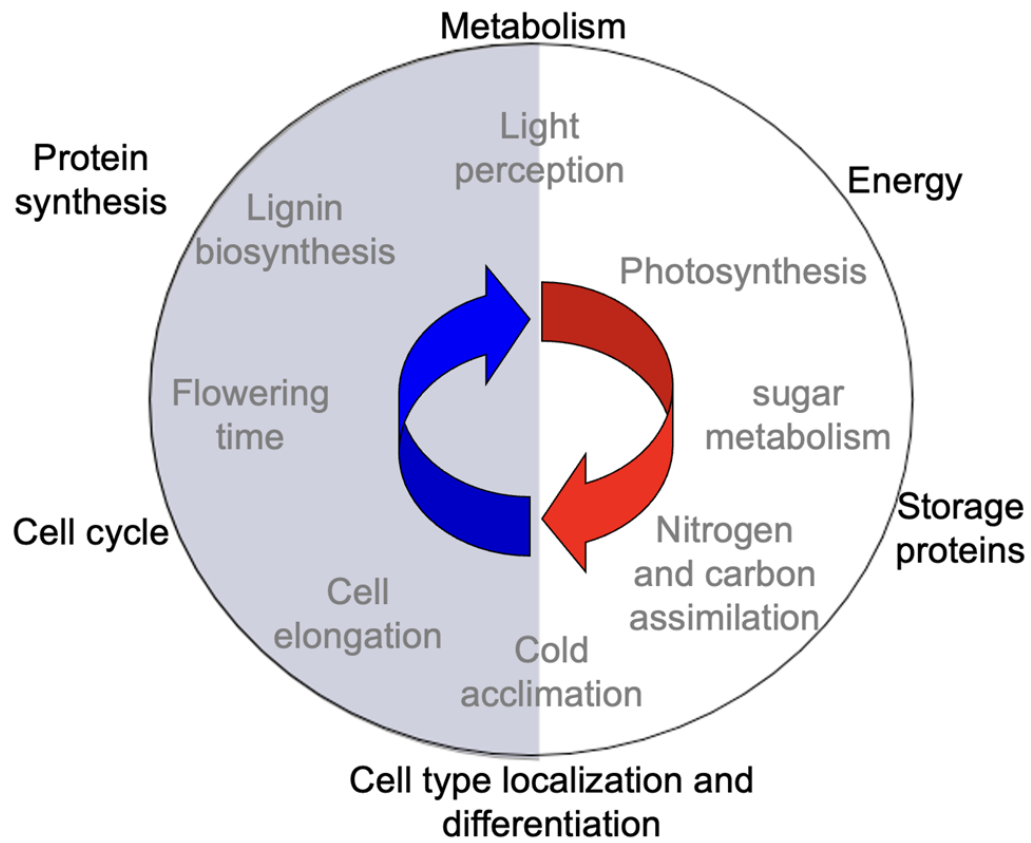

**Supplemental Figure S1.** Summary of TOD gene networks (related to Supplementary Text, below)

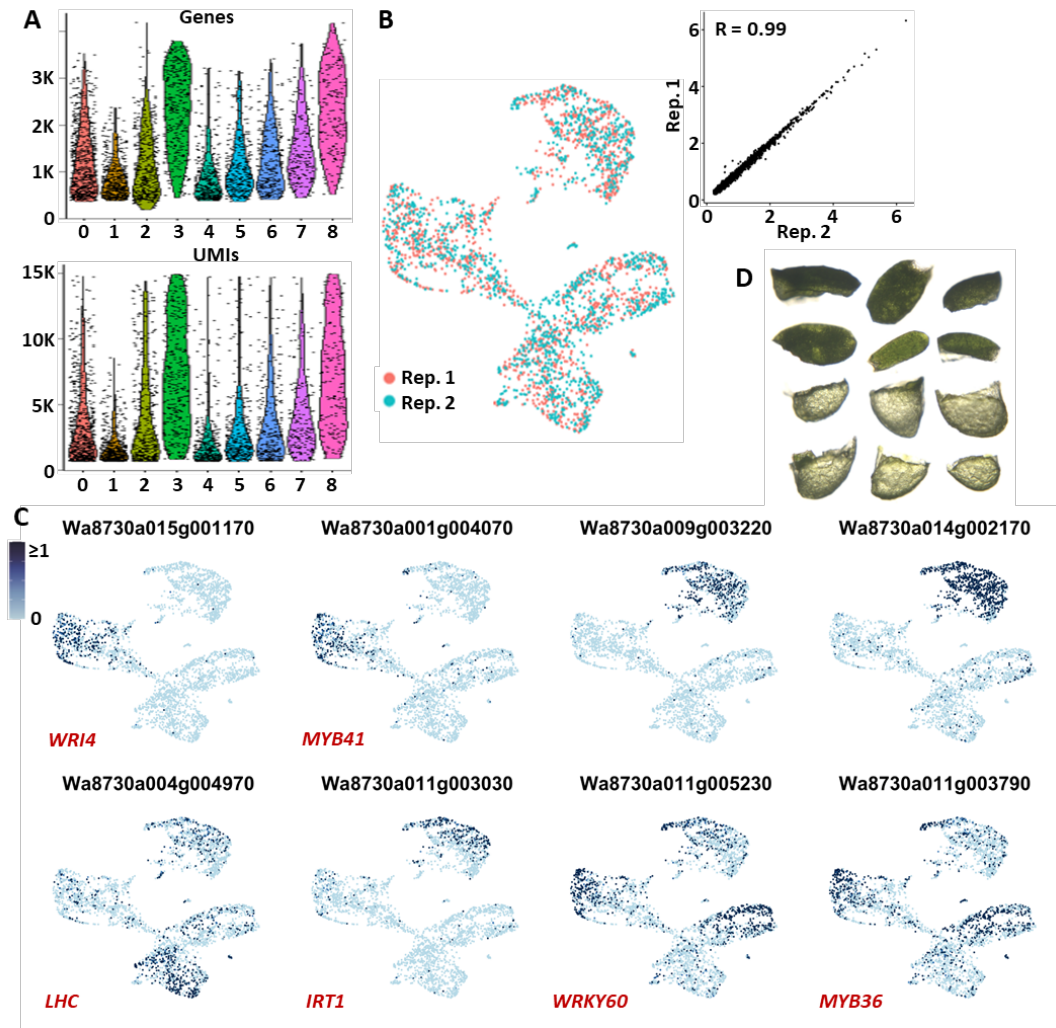

**Supplemental Figure S2.** A high-quality single cell atlas of whole *Wolffia* plants (related to Figure 1). **(A)** Distribution of the number of genes and UMIs per cell across clusters. Data for high quality cells (UMI > 650) within the dusk atlas are shown. **(B)** UMAP visualization highlighting cells from individual replicates (left) and Pearson's correlation of expression values between replicates (right) show that the two individual replicates within the dusk dataset are highly congruent. Only genes with expression in more than 10% of cells in each replicate were considered in each analysis. **(C)** UMAP projections of normalized expression for select differentially expressed genes within the atlas showing degrees of Supercluster specificity. Names of *Arabidopsis* orthologues are given in red. (Dataset S10). **(D)** Microscopic images of *Wolffia* plants bisected into above- (top two rows) and below-water (bottom two rows) segments.

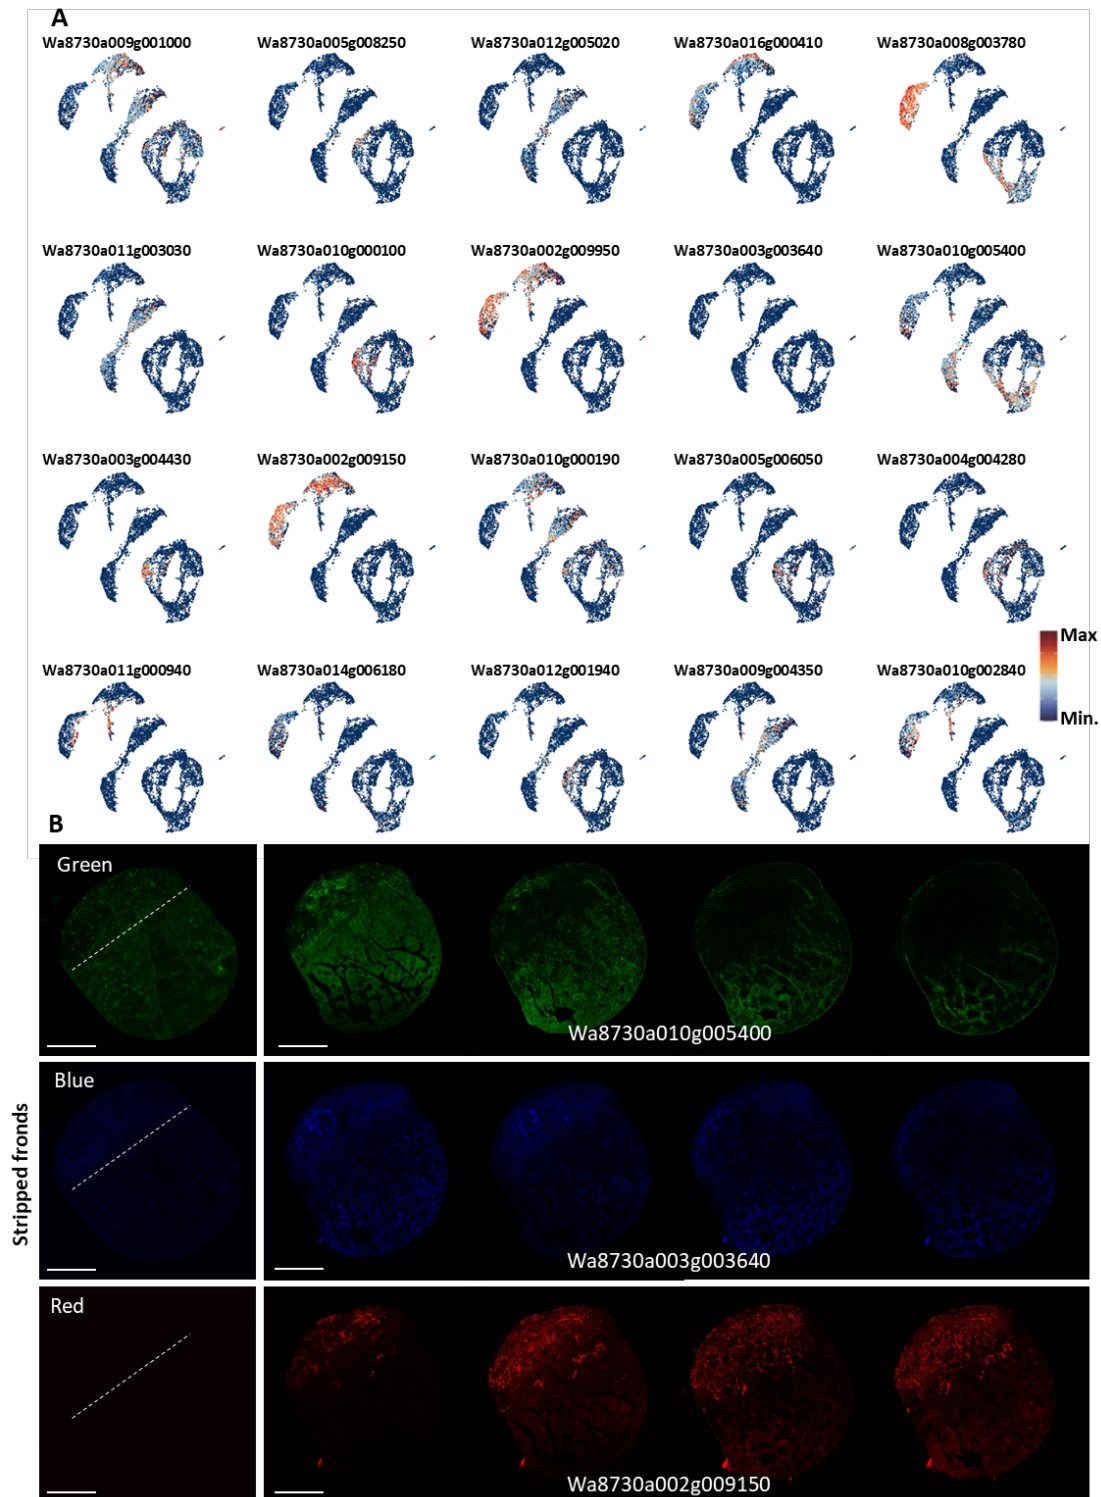

**Supplemental Figure S3.** Genes examined by PHYTOmap multiplex *in situ* RNA detection (related to Figure 2).

**(A)** UMAP projections of normalized expression for the tissue or condition specific genes examined by PHYTOmap (Table 2). **(B)** Left - Stacked confocal images of a *Wolffia* frond 'stripped' of fluorescent probes displaying a degree of autofluorescence, primarily in the green channel. Right - Four sequential optical sections in individual channels of the identical pre-stripped frond (set 3) showing distinct expression profiles as expected (Table 2). See Figure 2D for the composite image. Scale bar, 250  $\mu$ m.



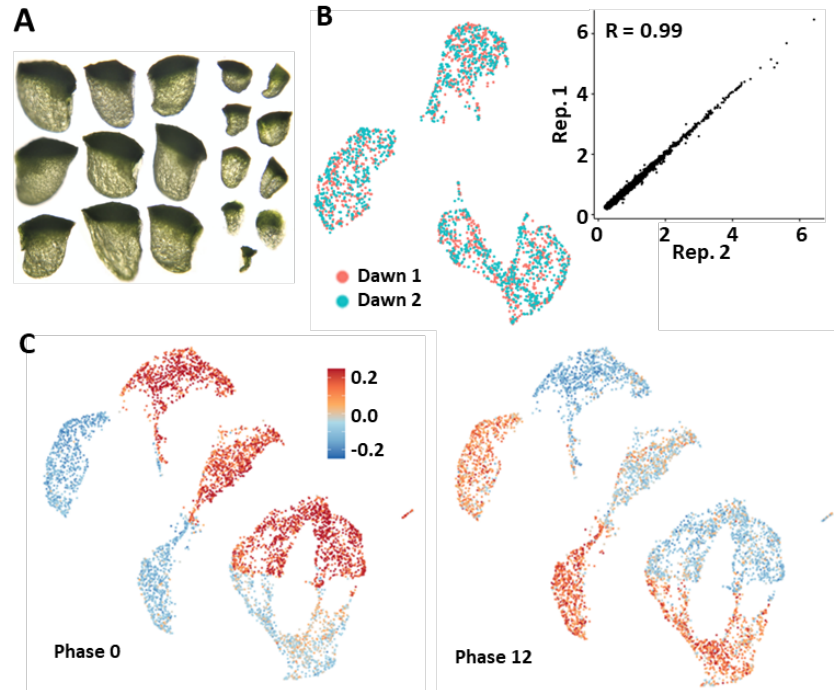

**Supplemental Figure S5.** *Wolffia* cells show mother/daughter and time of day distinctions (related to Figures 3-5). **(A)** Microscopic images of *Wolffia* plants bisected into mother (left) and daughter (right) fronds. **(B)** UMAP visualization highlighting cells from individual replicates (left) and Pearson's correlation of expression values between replicates (right) show that the two replicates for the dawn atlas are highly congruent. Only genes with expression in more than 10% of cells in each replicate were considered in each analysis. **(C)** UMAP projections of 'gene set activity' (Seurat) profiles of time-of-day cycling genes as determined by bulk RNA-Seq (Michael et al., 2020).



## SUPPLEMENTAL TEXT

### Circadian and time of day control of biological processes

Under natural conditions, plants experience changing day lengths and thermocycles that they must integrate via the circadian clock to synchronize with the environment over time (Oravec and Greenham, 2022; Michael et al., 2008). A growing number of studies have assayed time of day (TOD) regulated genes expression across plant species under standard lab conditions (for example, Bläsing et al., 2005, Michael et al., 2008; Hazen et al. 2009; Khan et al., 2010; Filichkin et al. 2011; Sato et al., 2013; Ferrari et al., 2019; Wai et al., 2019; Greenham et al., 2020; Lai et al., 2020; Michael et al., 2020). In general, across plant species, over 50% of genes cycle under specific diurnal conditions of light and/or temperature cycles, while between 5-20% genes cycle under circadian conditions of continuous light/temperature. There are exceptions, such as *Wolffia australiana*, for which only 13% of its genes cycling under diurnal light cycles (Michael et al., 2020), and spruce that only has 5.2% of genes cycling under diurnal long day conditions (Ferrari et al., 2019). In *Arabidopsis thaliana*, when eleven different conditions of light, temperature and daylength were tested in whole seedlings (shoot and root), more than 90% of genes display TOD expression under at least one condition, consistent with different environmental conditions playing specific roles in phasing biological processes (Michael et al., 2008). In the only field based developmental time course in rice, between 5-9% and 57-88% of genes cycle in the roots and above ground leaf tissue, respectively (Michael, 2022b), while only 29.9-40.8% of genes cycle under lab conditions of light, temperature or light and temperature (Filichkin et al., 2011). These results in *Arabidopsis* and rice suggest there are additional TOD cues beyond light and temperature that together result in almost global TOD expression in some plants, perhaps under some conditions cycling information is obscured due to cell-specific expression as well (Swift et al., 2021).

The fact that almost all genes have peak and trough expression at specific TOD in plants is consistent with plants being sessile organisms that need to be able to partition their biological processes to the correct TOD to anticipate the daily changing environment (Green et al., 2002; Michael et al., 2003; Dodd et al., 2005). One can infer which biological process, cellular compartment and Molecular Function are controlled at what TOD by looking at the Gene Ontology (GO) enrichment for genes with the same phase of expression (usually TOD peak expression). The pioneering study to look at gene function as a function of TOD used microarrays to identify genes controlled by the circadian clock under continuous conditions and highlighted several pathways with TOD expression. The study found that phenylpropanoid biosynthesis genes peak before dawn, photosynthesis genes peak at midday, starch-mobilizing genes peak during the evening, and cell wall synthesis genes peak after midnight (Harmer et al., 2000). Several studies followed that showed under diurnal conditions of light and temperature, many major processes and gene families are controlled in a TOD specific manner (Figure S1, Bläsing et al., 2005; Covington and Harmer 2007; Michael et al., 2008; Pan et al., 2009; Ferrari et al., 2019).

In *Wolffia* there are 92 significant GO terms that are TOD specific (*Arabidopsis* and rice have 238 and 253 respectively). While the shared genes are associated with growth and photosynthesis, the GO terms specific to *Arabidopsis* and rice are associated with terms related to their more complex body plans and lifestyles. When

the *Wolffia* TOD GO terms (Michael et al., 2020) are summarized into dawn, midday, evening and midnight, we find:

- Dawn (0-6 hrs) - Response to abiotic stimulus, pigment metabolism, negative regulation of mRNA splicing via spliceosome
- Midday (6-12 hrs) - Photosynthesis, seed dormancy process, protein localization to endoplasmic reticulum, organelle organization
- Evening (12-18 hrs) - Telomere formation via telomerase, xanthophyll metabolism, starch catabolism, cytoplasmic translation
- Midnight (18-24 hrs) - Sulfate assimilation, nitrate transport, response to iron ion starvation, plastoglobule organization, primary shoot apical meristem specification, fructose 1,6-bisphosphate metabolism, glycine catabolism (full lists can be found in Michael et al., 2020).

In our scRNA-seq dataset we identify differentially expressed genes (DEGs) between the dawn (Zeitgeber (ZT) 0) and dusk (ZT12) Superclusters (Dataset S9). Using a strict cut-off ( $\log_2$  FC >1 and adjusted p value <0.05), we find 364, 164, 157 and 157 TOD-specific DEGs for Superclusters CA, CB, CC and CD, respectively (Dataset S9). Consistent with the *Wolffia* TOD bulk RNA-seq, photosynthesis, response to light stimulus and chloroplast organization were enriched GO terms in the dawn DEGs, while translation and plastid were enriched GO terms in the dusk DEGs (Dataset S9). In the below water Superclusters, there were fewer significantly enriched GO terms in the dusk DEGs compared to the above water, suggesting either that the biological activities are more dispersed in these cell types or that our end of day (ZT12) timepoint didn't capture the TOD processes that occur in the middle of the night (midnight) such as cell cycle and protein synthesis (Dataset S9). Taken together, the scRNA-seq not only validates the TOD expression and predicted biological activities, it also suggests that there may be nuance at the single cell level that will require additional studies in whole plants.

#### References not otherwise in main text

Green RM., Tingay S, Wang Z-Y, Tobin EM. 2002. Circadian Rhythms Confer a Higher Level of Fitness to Arabidopsis Plants. *Plant Physiology* **129**, 576–84.

Greenham K, Sartor RC, Zorich S, Lou P, Mockler TC, McClung CR. 2020. Expansion of the Circadian Transcriptome in *Brassica Rapa* and Genome-Wide Diversification of Paralog Expression Patterns. *eLife* **9**.

Harmer SL., Hogenesch JB, Straume M, Chang HS, Han B, Zhu T, Wang X, Kreps JA, Kay SA. 2000. Orchestrated Transcription of Key Pathways in *Arabidopsis* by the Circadian Clock. *Science* **290**, 2110–13.

Hazen SP, Naef F, Quisel T, Gendron JM, Chen H, Ecker JR, Borevitz JO, Kay SA. 2009. Exploring the Transcriptional Landscape of Plant Circadian Rhythms Using Genome Tiling Arrays. *Genome Biology* **10**, R17.

Khan S, Rowe SC, Harmon FG. 2010. Coordination of the Maize Transcriptome by a Conserved Circadian Clock. *BMC Plant Biology* **10**, 126.

Lai X, Bendix C, Yan L, Zhang Y, Schnable JC, Harmon FG. 2020. Interspecific Analysis of Diurnal Gene Regulation in Panicoid Grasses Identifies Known and Novel Regulatory Motifs. *BMC Genomics* **21**, 428.

Michael TP, Mockler TC, Breton G, McEntee C, Byer A, Trout JD, Hazen SP, Shen R, Priest HD, Sullivan CM, et al. 2008. Network discovery pipeline elucidates conserved time-of-day-specific cis-regulatory modules. *PLoS Genetics* **4**, e14.

Pan Y, Michael TP, Hudson ME, Kay SA, Chory J, Schuler MA. 2009. Cytochrome P450 Monooxygenases as Reporters for Circadian-Regulated Pathways. *Plant Physiology* **150**, 858–78.

Sato Y, Takehisa H, Kamatsuki K, Minami H, Namiki N, Ikawa H, Ohyanagi H, Sugimoto K, Antonio BA, Nagamura Y. 2013. RiceXPro Version 3.0: Expanding the Informatics Resource for Rice Transcriptome. *Nucleic Acids Research* **41**, D1206–13.

Wai CM, Weise SE, Ozersky P, Mockler TC, Michael TP, VanBuren R. 2019. Time of Day and Network Reprogramming during Drought Induced CAM Photosynthesis in *Sedum Album*. *PLoS Genetics* **15**, e1008209.

## **SUPPLEMENTAL INTERACTIVE 3D UMAPS**

The Supplemental Information folder contains three .html files that can be opened on a browser. These show 3D UMAP projections for the dusk-, dawn- and combined atlases. Dragging the image allows the viewer to explore the projection while a panel on the right allows the viewer to isolate select clusters, rotate the image and zoom.

**Supplemental Interactive 3D UMAP S1** – Dusk dataset

**Supplemental Interactive 3D UMAP S2** – Dawn dataset

**Supplemental Interactive 3D UMAP S1** – Combined dusk/dawn dataset

## SUPPLEMENTAL TABLES

**Supplemental Table S1.** Organization of clusters within annotated Superclusters of dusk and dawn datasets.

| Condition               | Dusk                  |    |    |                        |    |                       |    |                        | Dawn |                       |    |                        |  |                       |    |                        |    |    |
|-------------------------|-----------------------|----|----|------------------------|----|-----------------------|----|------------------------|------|-----------------------|----|------------------------|--|-----------------------|----|------------------------|----|----|
| Supercluster            | CA                    |    |    | CB                     |    | CC                    |    | CD                     |      | CA                    |    | CB                     |  | CC                    |    | CD                     |    |    |
| Supercluster Annotation | Above Water Epidermis |    |    | Above Water Parenchyma |    | Below Water Epidermis |    | Below Water Parenchyma |      | Above Water Epidermis |    | Above Water Parenchyma |  | Below Water Epidermis |    | Below Water Parenchyma |    |    |
| Clusters                | C1                    | C3 | C7 | C2                     | C5 | C0                    | C8 | C4                     | C6   | C1                    | C3 | C2                     |  | C0                    | C6 | C4                     | C5 | C7 |

**Supplemental Table S2.** Genes analyzed using PHYTOmap with average expression values in the integrated dusk/dawn scRNA-Seq dataset.

| Gene              | Fluorescence Channel <sup>a</sup> | Set | Notes   | Expression Dusk <sup>b</sup> |      |      |      | Expression Dawn <sup>b</sup> |      |      |      |
|-------------------|-----------------------------------|-----|---------|------------------------------|------|------|------|------------------------------|------|------|------|
|                   |                                   |     |         | CA                           | CB   | CC   | CD   | CA                           | CB   | CC   | CD   |
| Wa8730a009g001000 | Blue                              | 1   |         | 1.14                         | 0.77 | 0.91 | 0.78 | 0.23                         | 0.28 | 0.26 | 0.33 |
| Wa8730a005g008250 | Green                             | 1   |         | 0.09                         | 0.04 | 0.06 | 0.71 | 0.06                         | 0.02 | 0.07 | 0.40 |
| Wa8730a012g005020 | Magenta                           | 1   |         | 0.18                         | 0.05 | 1.08 | 0.17 | 0.02                         | 0.02 | 0.81 | 0.14 |
| Wa8730a016g000410 | Red                               | 1   |         | 1.35                         | 0.00 | 0.00 | 0.05 | 1.24                         | 0.00 | 0.03 | 0.03 |
| Wa8730a008g003780 | Blue                              | 2   |         | 0.29                         | 0.09 | 0.00 | 0.17 | 3.00                         | 1.51 | 0.65 | 1.94 |
| Wa8730a011g003030 | Green                             | 2   |         | 0.27                         | 0.08 | 1.00 | 0.26 | 0.10                         | 0.04 | 0.69 | 0.35 |
| Wa8730a010g000100 | Magenta                           | 2   |         | 0.15                         | 0.15 | 0.12 | 1.00 | 0.08                         | 0.06 | 0.09 | 1.01 |
| Wa8730a002g009950 | Red                               | 2   |         | 1.14                         | 0.05 | 0.04 | 0.07 | 1.55                         | 0.03 | 0.01 | 0.29 |
| Wa8730a003g003640 | Blue                              | 3   | No Data | 0.00                         | 0.01 | 0.00 | 0.04 | 0.00                         | 0.00 | 0.00 | 0.21 |
| Wa8730a010g005400 | Green                             | 3   |         | 0.12                         | 0.36 | 0.21 | 0.19 | 0.80                         | 1.28 | 1.25 | 1.20 |
| Wa8730a003g004430 | Magenta                           | 3   | No Data | 0.10                         | 0.06 | 0.07 | 0.99 | 0.03                         | 0.07 | 0.02 | 0.92 |
| Wa8730a002g009150 | Red                               | 3   |         | 1.91                         | 0.05 | 0.03 | 0.10 | 1.94                         | 0.04 | 0.04 | 0.02 |
| Wa8730a010g000190 | Blue                              | 4   |         | 0.86                         | 0.57 | 0.91 | 0.57 | 0.04                         | 0.12 | 0.09 | 0.27 |
| Wa8730a005g006050 | Green                             | 4   |         | 0.06                         | 0.11 | 0.10 | 0.66 | 0.01                         | 0.12 | 0.06 | 0.60 |
| Wa8730a004g004280 | Magenta                           | 4   | No Data | 0.11                         | 0.31 | 0.06 | 0.88 | 0.03                         | 0.11 | 0.01 | 0.62 |
| Wa8730a011g000940 | Red                               | 4   |         | 0.56                         | 0.06 | 0.04 | 0.08 | 0.80                         | 0.05 | 0.12 | 0.23 |
| Wa8730a014g006180 | Blue                              | 5   |         | 0.04                         | 0.02 | 0.03 | 0.11 | 0.55                         | 0.31 | 0.26 | 0.23 |
| Wa8730a012g001940 | Green                             | 5   |         | 0.08                         | 0.05 | 0.13 | 0.58 | 0.13                         | 0.10 | 0.10 | 0.45 |
| Wa8730a009g004350 | Magenta                           | 5   | No Data | 0.09                         | 0.02 | 0.82 | 0.02 | 0.02                         | 0.01 | 0.62 | 0.06 |
| Wa8730a010g002840 | Red                               | 5   |         | 0.45                         | 0.04 | 0.02 | 0.04 | 1.00                         | 0.23 | 0.16 | 0.25 |

<sup>a</sup>Genes were analyzed in sets of four with individual fluorescent probe.

<sup>b</sup>Average normalized expression across cells of a Supercluster. Expression values are natural logarithm transformed (log(1+value)).

**Supplemental Table S3.** Genes differentially expressed between dusk and dawn in various Superclusters, and crossover with those identified in a bulk tissue study (Michael et al., 2020).

| Supercluster (SC) <sup>a</sup> | CA  | CB  | CC  | CD  | In any SC | In all SCs | In all SC and Bulk RNA-seq <sup>b</sup> |
|--------------------------------|-----|-----|-----|-----|-----------|------------|-----------------------------------------|
| Up in dusk                     | 179 | 72  | 73  | 68  |           |            |                                         |
| Up in dawn                     | 185 | 92  | 84  | 89  |           |            |                                         |
| Total                          | 364 | 164 | 157 | 157 | 456       | 76         | 58                                      |

<sup>a</sup> Supercluster DEGs - Log<sub>2</sub> FC>1 and adjusted p value <0.05

<sup>b</sup> Significance cut off for Bulk RNA-seq, R >0.8

**Supplemental Table S4.** scRNA-seq Metadata (as per Grones et al., 2024). Necessary reported information to allow evaluation and repetition of a plant single cell/nucleus experiment.

|                            | Details                                              | Experimental information                                                                                                                                           |
|----------------------------|------------------------------------------------------|--------------------------------------------------------------------------------------------------------------------------------------------------------------------|
| <b>Biological material</b> | Species                                              | <i>Wolffia australiana</i>                                                                                                                                         |
|                            | Accession                                            | 8730                                                                                                                                                               |
|                            | Tissue type                                          | Whole plant                                                                                                                                                        |
|                            | Detailed growth conditions                           | Plants grown at 12 h light (100 $\mu$ E)/12 h dark cycles at a constant 24 °C in 100 ml nutrient medium (0.5 $\times$ Schenk & Hildebrandt, 0.1% sucrose, pH 6.7). |
|                            | Harvest conditions                                   | Dusk (lights off) or dawn (lights on)                                                                                                                              |
| <b>Sample preparation</b>  | Isolation protocol                                   | Digestion, 1.5% Cellulase R-10, 1% Maceroenzyme, 0.5% Pectolyase                                                                                                   |
|                            | Total sample preparation time                        | Digestion to loading 2 H                                                                                                                                           |
|                            | Estimated cell/nuclei number loaded                  | ~5,000/sample                                                                                                                                                      |
|                            | Instrument/Method/Kit                                | 10x Genomics Single Cell 3' Reagent Kit v 3.1                                                                                                                      |
|                            | Cell viability test                                  | Microscopic analysis                                                                                                                                               |
| <b>Libraries</b>           | Library construction                                 | 10x Genomics Single Cell 3' Reagent Kit v 3.1                                                                                                                      |
|                            | Amplification method                                 | As per protocol (11x PCR cycles for cDNA amplification, 12x cycles for final amplification)                                                                        |
| <b>Sequence results</b>    | Instrument/method                                    | NovoSeq PE150                                                                                                                                                      |
|                            | N° sequenced reads                                   | 20,000 reads per cell                                                                                                                                              |
| <b>Raw data</b>            | Reference genome                                     | <i>W. australiana</i> line 8730 (Wa8730.asm201904v2.fasta)                                                                                                         |
|                            | Annotation version                                   | V2                                                                                                                                                                 |
|                            | Mapping method (incl. software, customized settings) | STAR (version 2.7.10a)                                                                                                                                             |
|                            | Sequencing saturation                                | 48.6%                                                                                                                                                              |



|                          |                                                                            |                                                                                                                                                                                   |
|--------------------------|----------------------------------------------------------------------------|-----------------------------------------------------------------------------------------------------------------------------------------------------------------------------------|
|                          | Fraction of reads in cells (10x Genomics)                                  | ~49.6 %                                                                                                                                                                           |
| <b>Processed data</b>    | N° captured cells/nuclei                                                   | 5,604 cells (total)                                                                                                                                                               |
|                          | N° high quality cells/nuclei                                               | 5,604 cells (total)                                                                                                                                                               |
|                          | Filter criteria: % mitochondrial reads/cell or nucleus                     | Not filtered by this criterion                                                                                                                                                    |
|                          | Filter criteria: % chloroplast reads/cell or nucleus                       | Not filtered by this criterion                                                                                                                                                    |
|                          | Filter criteria: Minimum N° UMI/cell or nucleus                            | 650 < Number of UMI per cell < 15,000                                                                                                                                             |
|                          | N° total detected transcripts                                              | Dusk: 12,825<br>Dawn: 12,565                                                                                                                                                      |
|                          | Doublet rate                                                               | Estimated at ~4 % based on cell capture (10x Genomics)                                                                                                                            |
|                          | Batch correction method for merging (incl. reasoning for batch correction) | Unnecessary due to replicates overlapping very well                                                                                                                               |
| <b>Validation</b>        | Method of automatic annotation of clusters                                 | n/a                                                                                                                                                                               |
|                          | Method of manual annotation (markers, gene function info)                  | DEG analysis, GO enrichment analysis, PHYTOMap analysis of Marker Genes                                                                                                           |
|                          | Verification in planta (e.g. Number of markers used for validation)        | PHYTOMap analysis of ~24 Marker Genes across tissue types                                                                                                                         |
| <b>Data availability</b> | Analysis scripts & codes (GitHub)                                          | n/a                                                                                                                                                                               |
|                          | Excel Tables DEG for each cluster                                          | See Datasets S1, S4, S7 & S8                                                                                                                                                      |
|                          | Objects/count matrix in repository (which one, where?)                     | NCBI project number PRJNA615235                                                                                                                                                   |
|                          | On-line tool/browser URL                                                   | <a href="https://www.zmbp-resources.uni-tuebingen.de/timmermans/plant-single-cell-browser/">https://www.zmbp-resources.uni-tuebingen.de/timmermans/plant-single-cell-browser/</a> |

**Supplemental Table S5.** NCBI SRA accessions for the *Wolffia* bulk and single cell RNA-seq datasets generated in this study.

| Accession   | Title                                                  |
|-------------|--------------------------------------------------------|
| SRR28238825 | RNA-seq of <i>Wolffia</i> : whole frond - Rep3         |
| SRR28238826 | RNA-seq of <i>Wolffia</i> : whole frond - Rep2         |
| SRR28238827 | RNA-seq of <i>Wolffia</i> : whole frond - Rep1         |
| SRR28238828 | RNA-seq of <i>Wolffia</i> : daughter frond - Rep3      |
| SRR28238829 | RNA-seq of <i>Wolffia</i> : daughter frond - Rep2      |
| SRR28238817 | RNA-seq of <i>Wolffia</i> : daughter frond - Rep1      |
| SRR28238818 | RNA-seq of <i>Wolffia</i> : mother frond - Rep3        |
| SRR28238819 | RNA-seq of <i>Wolffia</i> : mother frond - Rep2        |
| SRR28238820 | RNA-seq of <i>Wolffia</i> : mother frond - Rep1        |
| SRR28238821 | RNA-seq of <i>Wolffia</i> : below water protion - Rep3 |
| SRR28238822 | RNA-seq of <i>Wolffia</i> : below water protion - Rep2 |
| SRR28238823 | RNA-seq of <i>Wolffia</i> : below water protion - Rep1 |
| SRR28238824 | RNA-seq of <i>Wolffia</i> : above water protion - Rep3 |
| SRR28238830 | RNA-seq of <i>Wolffia</i> : above water protion - Rep2 |
| SRR28238831 | RNA-seq of <i>Wolffia</i> : above water protion - Rep1 |
| SRR29417744 | scRNA-seq of <i>Wolffia</i> at dusk - Rep1             |
| SRR29417743 | scRNA-seq of <i>Wolffia</i> at dusk - Rep2             |
| SRR29417746 | scRNA-seq of <i>Wolffia</i> at dawn - Rep1             |
| SRR29417745 | scRNA-seq of <i>Wolffia</i> at dawn - Rep2             |
