# Supplementary material for: Streamlined spatial and environmental expression signatures characterize the minimalist duckweedWolffia australiana
Source: HighWire-hosted journal article supplement (doi:10.1101/gr.279091.124), 2024-07-01
Supplement: Supplemental_Dataset_S1.xlsx [file Supplemental_Dataset_S1.xlsx]

## Sheet: SC A DEGs
Dataset S1. Differentially Expressed Genes for Dusk Supercluster A
Genes showing significant differential expression (log2 FC>1 & p_val_adj <0.05 & PCT1 > 10%) in the given supercluster versus all other cells in the dataset
PCT1: Percentage of cells within the Supercluster expressing the gene
PCT2: Percentage of cells outside the Supercluster expressing the gene
DEGs also of Dawn Supercluster A
Gene	Ave. Log2 FC	p Value	p Value Adj.	PCT1	PCT2	Arabidopsis orthologues	Arabidopsis gene names	Arabidopsis gene description
Wa8730a016g000410	1.92468	6.93661e-157	9.67102e-153	0.309	0.003
Wa8730a007g004260	1.62641	2.01947e-180	2.81554e-176	0.354	0.004	AT4G08910 AT1G22250 AT1G78170
Wa8730a005g005530	1.20568	8.29822e-181	1.15694e-176	0.356	0.004	AT3G49190		O-acyltransferase (WSD1-like) family protein
Wa8730a001g012110	1.02286	5.83001e-67	8.12819e-63	0.146	0.004	AT3G54040		PAR1 protein
Wa8730a008g000640	1.9369	5.19252e-250	7.23941e-246	0.47	0.005
Wa8730a006g002600	2.43857	1.90693e-238	2.65864e-234	0.456	0.006	AT1G79460	ATKS, ATKS1, GA2, KS, KS1	Encodes for a protein with ent-kaurene synthase B activity which catalyzes the second step in the cyclization of GGPP to ent-kaurene in the gibberellins biosynthetic pathway.
Wa8730a004g002220	1.93223	1.00821e-149	1.40565e-145	0.308	0.006	AT5G55620 AT5G41761
Wa8730a011g004700	1.54765	8.63387e-73	1.20373e-68	0.166	0.006	AT5G57800	CER3, FLP1, WAX2, YRE	encodes a transmembrane protein with similarity to the sterol desaturase family at the N-terminus and to the short-chain dehydrogenase/reductase family at the C-terminus. Mutant analyses indicate this protein is involved in cuticle membrane and wax biosynthesis.
Wa8730a008g004200	1.41716	6.23831e-139	8.69745e-135	0.288	0.006	AT3G20395 AT1G12760 AT1G63170		RING/U-box superfamily protein Zinc finger, C3HC4 type (RING finger) family protein Zinc finger, C3HC4 type (RING finger) family protein
Wa8730a008g005930	1.39745	1.0321e-151	1.43896e-147	0.31	0.006	AT4G21380 AT4G28350 AT1G50610 AT4G03230 AT1G61610 AT4G27290 AT1G11300	ARK3, RK3 LecRK-VII.2 PRK5	encodes a putative receptor-like serine/threonine protein kinases that is similar to Brassica self-incompatibility (S) locus. Expressed in root. Shoot expression limited to limited to the root-hypocotyl transition zone and at the base of lateral roots as well as in axillary buds, and pedicels. Concanavalin A-like lectin protein kinase family protein Leucine-rich repeat protein kinase family prote…
Wa8730a020g002800	1.30057	1.75685e-166	2.4494e-162	0.338	0.006	AT1G67730 AT1G24470 AT5G65205	ATKCR1, KCR1, YBR159 ATKCR2, KCR2	Encodes one of the two Arabidopsis homologues to YBR159w encoding a S. cerevisiae beta-ketoacyl reductase (KCR), which catalyzes the first reduction during VLCFA (very long chain fatty acids, >18 carbon) elongation: KCR1 (At1g67730), KCR2 (At1g24470). Complementation of the yeast ybr159Delta mutant demonstrated that the two KCR proteins are divergent and that only AtKCR1 can restore heterologous …
Wa8730a015g001170	1.28374	5.0651e-157	7.06176e-153	0.323	0.006	AT1G16060 AT1G79700	ADAP, WRI3 WRI4	Encodes ADAP, an AP2-domain protein that interacts with ARIA. ADAP is a positive regulator of the ABA response and is also involved in regulating seedling growth. WRI4 encodes an AP2/ERF-type transcriptional activator that specifically controls cuticular wax biosynthesis in Arabidopsis stems. It also functions to activate transcription of genes involved fatty acid biosynthesis during seed and flo…
Wa8730a003g005060	2.34468	4.93778e-235	6.88426e-231	0.457	0.008	AT1G68530 AT1G25450 AT2G26640 AT4G34510 AT5G43760 AT1G19440	CER6, CUT1, G2, KCS6, POP1 CER60, KCS5 KCS11 KCS17 KCS20 KCS4	Encodes KCS6, a member of the 3-ketoacyl-CoA synthase family involved in the biosynthesis of VLCFA (very long chain fatty acids). Encodes KCS5, a member of the 3-ketoacyl-CoA synthase family involved in the biosynthesis of VLCFA (very long chain fatty acids). Encodes KCS11, a member of the 3-ketoacyl-CoA synthase family involved in the biosynthesis of VLCFA (very long chain fatty acids). Encodes …
Wa8730a008g004660	2.77994	2.74617e-148	3.82871e-144	0.314	0.009
Wa8730a002g009150	2.67457	1.23783e-263	1.72578e-259	0.505	0.01	AT1G65060 AT4G19010	4CL3	encodes an isoform of 4-coumarate:CoA ligase (4CL), which is involved in the last step of the general phenylpropanoid pathway. mRNA levels are not induced in response to wounding or to fungal infection by P. parasitica. mRNA is expressed in flowers, to a lesser degree in mature leaves and siliques and marginally in seedling roots and bolting stems of mature plants. The catalytic efficiency was in…
Wa8730a011g004580	1.67129	1.89729e-108	2.6452e-104	0.246	0.01	AT5G57800	CER3, FLP1, WAX2, YRE	encodes a transmembrane protein with similarity to the sterol desaturase family at the N-terminus and to the short-chain dehydrogenase/reductase family at the C-terminus. Mutant analyses indicate this protein is involved in cuticle membrane and wax biosynthesis.
Wa8730a020g002780	1.43835	3.07547e-203	4.28782e-199	0.41	0.01	AT1G67730 AT1G24470	ATKCR1, KCR1, YBR159 ATKCR2, KCR2	Encodes one of the two Arabidopsis homologues to YBR159w encoding a S. cerevisiae beta-ketoacyl reductase (KCR), which catalyzes the first reduction during VLCFA (very long chain fatty acids, >18 carbon) elongation: KCR1 (At1g67730), KCR2 (At1g24470). Complementation of the yeast ybr159Delta mutant demonstrated that the two KCR proteins are divergent and that only AtKCR1 can restore heterologous …
Wa8730a002g009950	1.56997	3.48055e-208	4.85259e-204	0.423	0.011	AT2G28630 AT5G04530	KCS12 KCS19	Encodes KCS12, a member of the 3-ketoacyl-CoA synthase family involved in the biosynthesis of VLCFA (very long chain fatty acids). Encodes KCS19, a member of the 3-ketoacyl-CoA synthase family involved in the biosynthesis of VLCFA (very long chain fatty acids).
Wa8730a020g002750	2.94828	0	0	0.64	0.013	AT1G67730 AT1G24470	ATKCR1, KCR1, YBR159 ATKCR2, KCR2	Encodes one of the two Arabidopsis homologues to YBR159w encoding a S. cerevisiae beta-ketoacyl reductase (KCR), which catalyzes the first reduction during VLCFA (very long chain fatty acids, >18 carbon) elongation: KCR1 (At1g67730), KCR2 (At1g24470). Complementation of the yeast ybr159Delta mutant demonstrated that the two KCR proteins are divergent and that only AtKCR1 can restore heterologous …
Wa8730a009g001620	1.30294	2.37274e-48	3.30808e-44	0.138	0.013	AT5G05270	AtCHIL, CHIL	Chalcone-flavanone isomerase family protein
Wa8730a003g003400	1.86424	5.83664e-194	8.13744e-190	0.411	0.015	AT4G16442		Uncharacterised protein family (UPF0497)
Wa8730a008g000170	2.84905	9.27978e-166	1.29379e-161	0.362	0.016
Wa8730a007g003940	1.41393	4.01446e-52	5.59696e-48	0.156	0.018	AT5G13930	ATCHS, CHS, TT4	Encodes chalcone synthase (CHS), a key enzyme involved in the biosynthesis of flavonoids. Required for the accumulation of purple anthocyanins in leaves and stems. Also involved in the regulation of auxin transport and the modulation of root gravitropism.
Wa8730a011g004730	1.71404	8.26943e-136	1.15292e-131	0.318	0.019	AT5G57800	CER3, FLP1, WAX2, YRE	encodes a transmembrane protein with similarity to the sterol desaturase family at the N-terminus and to the short-chain dehydrogenase/reductase family at the C-terminus. Mutant analyses indicate this protein is involved in cuticle membrane and wax biosynthesis.
Wa8730a019g001620	2.5415	0	0	0.629	0.02	AT3G66658 AT1G44170	ALDH22A1 ALDH3H1, ALDH4	Encodes a putative aldehyde dehydrogenase. The gene is not responsive to osmotic stress and is expressed constitutively at a low level in plantlets and root cultures. Encodes a protein similar to the aldehyde dehydrogenase cp-ADH from C.plantagineum. Constitutively expressed at low levels.
Wa8730a012g005240	1.14247	1.99835e-116	2.7861e-112	0.289	0.02	AT3G28910 AT1G74650 AT4G12350 AT1G08810 AT3G47600	ATMYB30, MYB30 ATMYB31, ATY13, MYB31 AtMYB42, MYB42 AtMYB60, MYB60 ATMYB94, ATMYBCP70, MYB94	transcription factor myb homologue Member of the R2R3 factor gene family. Encodes a putative transcription factor (MYB42). putative transcription factor of the R2R3-MYB gene family. Transcript increases under conditions that promote stomatal opening (white and blue light, abi1-1 mutation) and decreases under conditions that trigger stomatal closure (ABA, desiccation, darkness), with the exception…
Wa8730a014g001620	2.7457	9.52403e-219	1.32784e-214	0.463	0.022
Wa8730a012g004760	1.06677	3.19511e-129	4.45462e-125	0.316	0.022	AT5G26340 AT1G77210 AT1G50310 AT1G34580	ATSTP13, MSS1, STP13 AtSTP14, STP14 ATSTP9, STP9	Encodes a protein with high affinity, hexose-specific/H+ symporter activity. The activity of the transporter appears to be negatively regulated by phosphorylation. Importantly, microarray analysis, as well as the study of the expression of this gene in mutants involved in programmed cell death (PCD) demonstrated a tight correlation between this gene's expression and PCD. AtSTP14 belongs to the fa…
Wa8730a015g005080	2.83912	0	0	0.674	0.024
Wa8730a015g003690	2.2511	1.51009e-264	2.10537e-260	0.543	0.024	AT3G07680	p24beta2	Encodes an Golgi-localized p24 protein. Interacts with p24delta5 at ER export sites for ER exit and coupled transport to the Golgi apparatus. The mRNA is cell-to-cell mobile.
Wa8730a008g003430	3.85329	4.21347e-189	5.87442e-185	0.427	0.025
Wa8730a011g004850	2.15138	2.7926e-257	3.89344e-253	0.539	0.028
Wa8730a009g002200	2.03698	2.81623e-246	3.92639e-242	0.52	0.028	AT3G05020 AT5G27200	ACP, ACP1 ACP5	encodes an acyl carrier protein expressed in leaves, roots, and dry seeds. Protein is not regulated by light. encodes an acyl carrier protein
Wa8730a015g005520	3.3252	0	0	0.675	0.029
Wa8730a013g001880	2.80344	1.16443e-241	1.62345e-237	0.517	0.03	AT1G07240	UGT71C5	Encodes a UDP-glucosyltransferase that plays a role in abscisic acid (ABA) glucosylation from ABA to ABA-glucose ester and regulates ABA homeostasis, thereby influencing the ABA signal network.
Wa8730a001g004070	1.01602	2.55174e-96	3.55764e-92	0.277	0.03	AT2G32460 AT3G62610 AT5G49330 AT2G47460 AT3G23250 AT4G28110 AT5G54230 AT3G13540 AT1G56160 AT5G56110 AT4G26930	ATM1, ATMYB101, MYB101 ATMYB11, MYB11, PFG2 ATMYB111, MYB111, PFG3 ATMYB12, MYB12, PFG1 ATMYB15, ATY19, MYB15 AtMYB41, MYB41 AtMYB49, MYB49 ATMYB5, MYB5 ATMYB72, MYB72 ATMYB80, AtMYB103, MS188, MYB103, MYB80 AtMYB97, MYB97	Member of the R2R3 factor gene family. Member of the R2R3 factor gene family. Member of the R2R3 factor gene family. MYB12 belongs to subgroup 7 of the R2R3-MYB family. It strongly activates the promoters of chalcone synthase (CHS), flavanone 3-hydroxylase (F3H), flavonol synthase (FLS) and - to a lesser extent - chalcone flavanone isomerase (CHI), but cannot activate the promoters of flavonoid-3…
Wa8730a012g001710	1.63624	6.88431e-163	9.5981e-159	0.4	0.033	AT5G63790	ANAC102, NAC102	Encodes a member of the NAC family of transcription factors. ANAC102 appears to have a role in mediating response to low oxygen stress (hypoxia) in germinating seedlings.
Wa8730a018g000750	2.57774	6.72599e-228	9.37737e-224	0.507	0.034	AT3G55120	A11, AtCHI, CFI, CHI, TT5	Catalyzes the conversion of chalcones into flavanones. Required for the accumulation of purple anthocyanins in leaves and stems.
Wa8730a014g001630	2.78248	3.53954e-268	4.93482e-264	0.572	0.036
Wa8730a003g006990	1.20983	3.06078e-159	4.26734e-155	0.405	0.036	AT1G68530 AT2G26250 AT1G04220 AT1G19440	CER6, CUT1, G2, KCS6, POP1 FDH, KCS10 KCS2 KCS4	Encodes KCS6, a member of the 3-ketoacyl-CoA synthase family involved in the biosynthesis of VLCFA (very long chain fatty acids). epidermis-specific, encodes KCS10, a putative 3-ketoacyl-CoA synthase. probably involved in the synthesis of long-chain lipids found in the cuticle. Encodes KCS2, a member of the 3-ketoacyl-CoA synthase family involved in the biosynthesis of VLCFA (very long chain fatt…
Wa8730a007g007620	1.36568	4.66228e-99	6.50015e-95	0.31	0.043
Wa8730a007g003870	1.3301	1.18313e-153	1.64951e-149	0.407	0.043	AT5G13400		Major facilitator superfamily protein
Wa8730a006g002880	1.71644	7.81748e-194	1.08991e-189	0.477	0.044	AT3G25400
Wa8730a008g002540	1.24004	3.03865e-145	4.23649e-141	0.402	0.046	AT5G10480	PAS2, PEP	Protein tyrosine phosphatase-like involved in cell division and differentiation. Interacts with CDKA 1 only in its phosphorylated form, preventing dephosphorylation. Overexpression slowed down cell division in suspension cell cultures at the G2-to-M transition and early mitosis and inhibited Arabidopsis seedling growth. Localized in the cytoplasm of dividing cells but moved into the nucleus upon …
Wa8730a007g006660	1.16267	8.38472e-87	1.169e-82	0.294	0.048	AT1G21680		DPP6 N-terminal domain-like protein
Wa8730a005g003480	2.7012	2.47444e-186	3.44986e-182	0.48	0.051	AT5G25610	ATRD22, RD22	responsive to dehydration 22 (RD22) mediated by ABA
Wa8730a011g002460	1.31912	7.01649e-152	9.78239e-148	0.428	0.054	AT5G61320 AT1G64950 AT3G03470 AT2G12190	CYP89A3 CYP89A5 CYP89A9	member of CYP89A member of CYP89A member of CYP89A Cytochrome P450 superfamily protein
Wa8730a003g000920	1.14913	6.00595e-91	8.3735e-87	0.322	0.056
Wa8730a012g004670	1.37538	3.68285e-74	5.13463e-70	0.294	0.062	AT4G39980 AT4G33510 AT1G22410	DHS1 DHS2	Encodes a 2-deoxy-D-arabino-heptulosonate 7-phosphate (DAHP) synthase, which catalyzes the first committed step in aromatic amino acid biosynthesis. Gene expression is induced by wounding and pathogenic bacteria Pseudomonas syringae. Enzyme catalyzing the first committed step in aromatic amino acid biosynthesis Class-II DAHP synthetase family protein
Wa8730a004g005840	1.15901	3.32047e-95	4.6294e-91	0.342	0.062	AT4G37540 AT1G67100 AT1G68510	LBD39 LBD40 LBD42	LOB domain-containing protein 39 LOB domain-containing protein 40 LOB domain-containing protein 42
Wa8730a008g004080	1.43396	1.98274e-119	2.76433e-115	0.384	0.064	AT1G11840	ATGLX1, GLX1	Encodes a glyoxalase I homolog ATGLX1.
Wa8730a013g005120	1.10654	1.98672e-94	2.76989e-90	0.35	0.066
Wa8730a006g005060	3.40128	0	0	0.795	0.07	AT5G15290 AT1G14160	CASP5	Uncharacterised protein family (UPF0497) Uncharacterised protein family (UPF0497)
Wa8730a012g001190	1.57512	1.3073e-128	1.82264e-124	0.42	0.073	AT3G12203 AT1G33540 AT5G09640 AT3G52000	scpl17 scpl18 SCPL19, SNG2 scpl36	serine carboxypeptidase-like 17 serine carboxypeptidase-like 18 encodes a serine carboxypeptidase-like (SCPL) protein. Mutants accumulate sinapoylglucose instead of sinapoylcholine, and have increased levels of choline and decreased activity of the enzyme sinapoylglucose:choline sinapoyltransferase. serine carboxypeptidase-like 36
Wa8730a007g002140	1.16436	2.44095e-71	3.40317e-67	0.32	0.076	AT5G48500
Wa8730a019g003750	1.53037	1.6732e-163	2.33278e-159	0.491	0.079	AT5G02400 AT3G09400 AT2G46920 AT3G17090	PLL2 PLL3 POL	Encodes a protein with similarity to the POL locus which is a novel protein phosphatase 2C. Ubiquitously expressed. No phenotype observed in homozygous null mutant background. Similar to POLTERGEIST (POL) protein phosphatase 2C. No phenotype observed in plants homozygous for a null allele. Ubiquitously expressed. Pol mutations are recessive, partial suppressors of meristem defects in strong clv1 …
Wa8730a008g000530	4.634	0	0	0.756	0.082
Wa8730a014g005820	2.53554	2.13645e-268	2.97863e-264	0.642	0.082	AT3G10280 AT4G34510 AT1G04220 AT5G43760 AT1G19440 AT2G16280	KCS14 KCS17 KCS2 KCS20 KCS4 KCS9	Encodes KCS14, a member of the 3-ketoacyl-CoA synthase family involved in the biosynthesis of VLCFA (very long chain fatty acids). Encodes KCS17, a member of the 3-ketoacyl-CoA synthase family involved in the biosynthesis of VLCFA (very long chain fatty acids). Encodes KCS2, a member of the 3-ketoacyl-CoA synthase family involved in the biosynthesis of VLCFA (very long chain fatty acids). Encodes…
Wa8730a001g001120	3.87671	0	0	0.741	0.085
Wa8730a009g004750	1.08619	2.0719e-84	2.88864e-80	0.369	0.09
Wa8730a001g007340	3.61923	0	0	0.794	0.095	AT2G18800 AT2G06850 AT4G30270 AT4G14130 AT4G25810 AT5G57550	ATXTH21, XTH21 EXGT-A1, EXT, XTH4 MERI-5, MERI5B, SEN4, XTH24 XTH15, XTR7 XTH23, XTR6 XTH25, XTR3	xyloglucan endotransglucosylase/hydrolase 21 endoxyloglucan transferase (EXGT-A1) gene encodes a protein similar to endo xyloglucan transferase in sequence. It is also very similar to BRU1 in soybean, which is involved in brassinosteroid response. xyloglucan endotransglycosylase-related protein (XTR7) xyloglucan endotransglycosylase-related protein (XTR6) xyloglucan endotransglycosylase-related p…
Wa8730a007g008940	1.11201	1.51043e-120	2.10584e-116	0.455	0.096
Wa8730a003g005030	1.47565	9.78565e-140	1.36432e-135	0.486	0.101	AT5G62630 AT1G74790	HIPL2	hipl2 protein precursor catalytics
Wa8730a001g010900	1.82673	2.37414e-155	3.31002e-151	0.515	0.106	AT5G16710	DHAR3	The protein undergoes thiolation following treatment with the oxidant tert-butylhydroperoxide.
Wa8730a011g001270	1.17698	3.05758e-95	4.26288e-91	0.418	0.107	AT1G76470 AT1G65010		NAD(P)-binding Rossmann-fold superfamily protein Putative role in flower development. Comparison of SALK_061426C to Columbia wild type in normal lighting and under low light of 33 micromoles per meter-squared per second resulted in a trend toward earlier bolting in the mutant under low light (P=0.055) (Ann Stapleton and Patrick Pridgen, 2009, personal communication).
Wa8730a018g002300	2.61535	8.62117e-188	1.20196e-183	0.582	0.113	AT5G57800	CER3, FLP1, WAX2, YRE	encodes a transmembrane protein with similarity to the sterol desaturase family at the N-terminus and to the short-chain dehydrogenase/reductase family at the C-terminus. Mutant analyses indicate this protein is involved in cuticle membrane and wax biosynthesis.
Wa8730a009g001610	5.53532	0	0	0.72	0.115	AT5G59320	LTP3	Predicted to encode a PR (pathogenesis-related) protein. Belongs to the lipid transfer protein (PR-14) family with the following members: At2g38540/LTP1, At2g38530/LTP2, At5g59320/LTP3, At5g59310/LTP4, At3g51600/LTP5, At3g08770/LTP6, At2g15050/LTP7, At2g18370/LTP8, At2g15325/LTP9, At5g01870/LTP10, At4g33355/LTP11, At3g51590/LTP12, At5g44265/LTP13, At5g62065/LTP14, At4g08530/LTP15.
Wa8730a013g002080	1.43135	1.54061e-120	2.14791e-116	0.477	0.115	AT4G11820	FKP1, HMGS, MVA1	Encodes a protein with hydroxymethylglutaryl-CoA synthase activity which was characterized by phenotypical complementation of the S. cerevisiae mutant.
Wa8730a019g003490	1.28927	2.57713e-123	3.59303e-119	0.488	0.121	AT4G01900	GLB1, PII	encodes a PII protein that may function as part of a signal transduction network involved in perceiving the status of carbon and organic nitrogen. Forms a protein complex with N-acetylglutamate kinase and regulates the kinase activity by relieving the feedback inhibition of the kinase by arginine. Regulates acetyl-CoA carboxylase activity.
Wa8730a015g004980	1.6635	9.41571e-145	1.31274e-140	0.55	0.144	AT4G34135 AT2G15490 AT1G24100 AT2G23250	UGT73B2 UGT73B4 UGT74B1 UGT84B2	The At4g34135 gene encodes a flavonol 7-O-glucosyltransferase (EC 2.4.1.237) that glucosylates also with a 20 fold lower activity flavonols (kaempferol and quercetin) at the 3-O-position. UDP-glycosyltransferase 73B4 Encodes a UDP-glucose:thiohydroximate S-glucosyltransferase, involved in glucosinolate biosynthesis UDP-glucosyl transferase 84B2
Wa8730a009g003340	1.00477	4.80958e-66	6.70552e-62	0.413	0.147	AT3G54180 AT2G38620 AT1G09600	CDC2B, CDKB1 1 CDKB1 2	Arabidopsis homolog of yeast cdc2, a protein kinase (cyclin-dependent kinase) that plays a central role in control of the mitotic cell cycle. Encodes a member of a plant specific family of cyclin dependent kinases. Protein kinase superfamily protein
Wa8730a010g004870	2.22204	5.91341e-201	8.24447e-197	0.63	0.149	AT5G48230	AACT2, ACAT2, EMB1276	Encodes an acetoacetyl-CoA thiolase that generates the bulk of the acetoacetyl-CoA precursor needed for the cytosolic localized, mevalonate-derived isoprenoids biosynthetic pathway. Loss-of-function mutants are embryo lethal.
Wa8730a017g002740	2.13298	1.2601e-190	1.75682e-186	0.62	0.151	AT2G16530 AT1G72590		Encodes polyprenol reductase involved in N-gylcosylation. Mutants are defective in pollen development. Knockouts are embryo lethal Encodes a polyphenol reductase.
Wa8730a009g001730	2.92865	0	0	0.794	0.157	AT2G41290 AT1G08470 AT3G57030 AT3G51440	SSL2 SSL3	Although this enzyme is predicted to encode a strictosidine synthase (SS), it lacks a conserved catalytic glutamate residue found in active SS enzymes and it is not expected to have SS activity. Although this enzyme is predicted to encode a strictosidine synthase (SS), it lacks a conserved catalytic glutamate residue found in active SS enzymes and it is not expected to have SS activity. Calcium-d…
Wa8730a013g005140	1.68475	1.46987e-86	2.04929e-82	0.471	0.159
Wa8730a015g004500	1.70892	3.1404e-143	4.37835e-139	0.564	0.16	AT1G60010 AT1G10530
Wa8730a016g000330	1.86069	9.02665e-158	1.2585e-153	0.603	0.163	AT3G47710 AT1G26945	BHLH161, BNQ3 KDR, PRE6	BNQ3 belongs to a family of atypical non-DNA binding basic helix-loop-helix (bHLH) proteins that heterodimerize with and negatively regulate bHLH transcription factors. Directly and negatively regulated by AP3 and PI in petals. Required for appropriate regulation of flowering time.May also have a role in regulating light responses. Encodes a basic helix-loop-helix (bHLH) protein involved in blue/…
Wa8730a016g001400	2.21777	1.37301e-241	1.91425e-237	0.72	0.168
Wa8730a019g002640	1.26961	7.4167e-96	1.03404e-91	0.506	0.173	AT5G19140	AILP1, ATAILP1	Aluminium induced protein with YGL and LRDR motifs
Wa8730a001g004950	2.89881	0	0	0.816	0.185
Wa8730a016g001110	1.25461	4.37678e-89	6.10211e-85	0.512	0.185	AT1G36160	ACC1, AT-ACC1, EMB22, GK, GSD1, PAS3, SFR3	Encodes acetyl-CoA carboxylase. Mutant displays uncoordinated cell divisions which are enhanced by cytokinins. Mutant also has aberrant organization of the apical region in the embryo and abnormal root and shoot development. Essential for very long chain fatty acid elongation.
Wa8730a001g011170	2.65936	1.63965e-299	2.286e-295	0.789	0.186	AT5G02540 AT2G37540 AT4G11410		NAD(P)-binding Rossmann-fold superfamily protein NAD(P)-binding Rossmann-fold superfamily protein NAD(P)-binding Rossmann-fold superfamily protein
Wa8730a003g005260	2.74731	2.49346e-245	3.47639e-241	0.73	0.189	AT1G68530 AT1G25450 AT2G26640 AT4G34510 AT5G43760 AT1G19440	CER6, CUT1, G2, KCS6, POP1 CER60, KCS5 KCS11 KCS17 KCS20 KCS4	Encodes KCS6, a member of the 3-ketoacyl-CoA synthase family involved in the biosynthesis of VLCFA (very long chain fatty acids). Encodes KCS5, a member of the 3-ketoacyl-CoA synthase family involved in the biosynthesis of VLCFA (very long chain fatty acids). Encodes KCS11, a member of the 3-ketoacyl-CoA synthase family involved in the biosynthesis of VLCFA (very long chain fatty acids). Encodes …
Wa8730a002g007490	1.2416	1.68107e-104	2.34375e-100	0.553	0.202	AT2G38040	CAC3	encodes the carboxyltransferase alpha subunit of acetyl-CoA carboxylase, involved in de novo fatty acid biosynthesis
Wa8730a018g003530	1.91732	1.01861e-158	1.42014e-154	0.64	0.214	AT1G60810 AT1G09430	ACLA-2 ACLA-3	One of the three genes encoding subunit A of the trimeric enzyme ATP Citrate lyase Encodes subunit A of the heteromeric enzyme ATP citrate lyase (ACL). In animals, ACL is encoded by a single gene ACL in Arabidopsis is composed of two polypeptides, ACLA (encoded by 3 genes) and ACLB (encoded by 2 genes). The holoenzyme has an A(4)B(4)stoichiometry. Expression of both ACLA and ACLB but not of eithe…
Wa8730a014g006080	1.14205	1.2403e-88	1.72923e-84	0.54	0.22
Wa8730a006g004320	1.70109	3.44382e-146	4.80137e-142	0.636	0.222	AT2G41480 AT5G64120 AT1G14540 AT5G66390 AT2G34060 AT5G15180 AT5G39580 AT3G03670 AT1G49570	AtPRX25, PRX25 AtPRX71, PRX71 PER4 PRX72	Encodes a cationic cell-wall-bound peroxidase homolog that is involved in the lignification of cell walls. encodes a cell wall bound peroxidase that is induced by hypo-osmolarity Peroxidase superfamily protein Encodes a peroxidase that is involved in lignin biosynthesis. Peroxidase superfamily protein Peroxidase superfamily protein Peroxidase superfamily protein Peroxidase superfamily protein Per…
Wa8730a017g001990	2.4668	7.84304e-235	1.09348e-230	0.743	0.224
Wa8730a007g006900	1.43576	1.80467e-120	2.51607e-116	0.611	0.228	AT4G34240 AT1G44170	ALDH3, ALDH3I1 ALDH3H1, ALDH4	Aldehyde dehydrogenase induced by ABA and dehydration Encodes a protein similar to the aldehyde dehydrogenase cp-ADH from C.plantagineum. Constitutively expressed at low levels.
Wa8730a006g004490	1.90318	1.60982e-184	2.24442e-180	0.691	0.23	AT1G24470	ATKCR2, KCR2	Encodes one of the two Arabidopsis homologues to YBR159w encoding a S. cerevisiae beta-ketoacyl reductase (KCR), which catalyzes the first reduction during VLCFA (very long chain fatty acids, >18 carbon) elongation: KCR1 (At1g67730), KCR2 (At1g24470). Complementation of the yeast ybr159Delta mutant demonstrated that the two KCR proteins are divergent and that only AtKCR1 can restore heterologous …
Wa8730a009g000590	1.39746	5.01226e-121	6.98809e-117	0.611	0.234	AT2G38050 AT3G55360	ATDET2, DET2, DWF6 ATTSC13, CER10, ECR, TSC13	Similar to mammalian steroid-5-alpha-reductase. Involved in the brassinolide biosynthetic pathway. Enoyl-CoA reductase is involved in all very long chain fatty acids (VLCFA) elongation reactions that are required for cuticular wax, storage lipid and sphingolipid metabolism. The protein is located in the ER, but in contrast to its yeast homolog TSC13 is not particularly enriched in the nuclear env…
Wa8730a004g004850	1.32482	5.94562e-93	8.28939e-89	0.57	0.247	AT3G21690 AT1G61890 AT4G21910 AT1G11670		MATE efflux family protein MATE efflux family protein MATE efflux family protein MATE efflux family protein
Wa8730a013g003830	2.0766	2.31133e-51	3.22246e-47	0.5	0.267
Wa8730a010g004880	2.24783	1.01724e-224	1.41824e-220	0.76	0.268	AT5G55850 AT5G63270 AT5G40645	NOI	NOI protein RPM1-interacting protein 4 (RIN4) family protein RPM1-interacting protein 4 (RIN4) family protein
Wa8730a009g003660	3.35126	2.94544e-95	4.10653e-91	0.598	0.275	AT2G38530	LP2, LTP2, cdf3	Involved in lipid transfer between membranes. Belongs to a family of Lipid transfer proteins. Sequence similarity to other plant/Arabidopsis LPT genes but highest similarity to LPT1. Stress and pathogen-inducible motifs found in the upstream region. Expressed in flower, leaves and siliques but absent in roots. Predicted to be a member of PR-14 pathogenesis-related protein family with the followin…
Wa8730a007g000880	1.21094	2.11361e-47	2.94679e-43	0.522	0.286	AT3G53190 AT3G01270 AT3G27400 AT4G24780 AT1G67750 AT5G04310 AT5G63180 AT3G24670 AT5G48900 AT4G13710 AT1G04680		Pectin lyase-like superfamily protein Pectate lyase family protein Encodes a pectate lyase involved in response to nematodes. Encodes a pectate lyase involved in response to nematodes. Pectate lyase family protein Pectin lyase-like superfamily protein Pectin lyase-like superfamily protein Pectin lyase-like superfamily protein Pectin lyase-like superfamily protein Pectin lyase-like superfamily pro…
Wa8730a013g004710	1.44177	4.82359e-132	6.72505e-128	0.682	0.293	AT5G43360 AT2G32830 AT3G54700	ATPT4, PHT1 3, PHT3 PHT1 5, PHT5 PHT1 7	Encodes Pht1 3, a member of the Pht1 family of phosphate transporters which include: Pht1 1/At5g43350, Pht1 2/At5g43370, Pht1 3/At5g43360, Pht1 4/At2g38940, Pht1 5/At2g32830, Pht1 6/At5g43340, Pht1 7/At3g54700, Pht1 8/At1g20860, Pht1 9/At1g76430 (Plant Journal 2002, 31:341). Encodes Pht1 5, a member of the Pht1 family of phosphate transporters which include: Pht1 1/At5g43350, Pht1 2/At5g43370, Ph…
Wa8730a009g005650	1.99168	2.57859e-97	3.59507e-93	0.623	0.295	AT1G27350		Ribosome associated membrane protein RAMP4
Wa8730a010g004620	1.28014	1.47199e-87	2.05225e-83	0.605	0.299	AT1G59640 AT5G62610 AT2G42300 AT1G10120	BPE, BPEp, BPEub, ZCW32	A basic helix-loop-helix encoding gene (BIGPETAL, BPE) involved in the control of petal size. BPE is expressed via two mRNAs derived from an alternative splicing event. The BPEub (AT1G59640.1)transcript is expressed ubiquitously, whereas the BPEp (AT1G59640.2) transcript is preferentially expressed in petals. Plants that lack the petal-expressed variant BPEp have larger petals as a result of incr…
Wa8730a005g008830	2.45796	6.32016e-238	8.81157e-234	0.809	0.3	AT1G30020		Protein of unknown function, DUF538
Wa8730a013g002970	1.25062	1.0147e-64	1.4147e-60	0.574	0.301
Wa8730a010g002100	1.16015	1.11633e-71	1.55638e-67	0.587	0.301	AT2G43050 AT5G53370 AT3G06830	ATPMEPCRD ATPMEPCRF, PMEPCRF	Plant invertase/pectin methylesterase inhibitor superfamily pectin methylesterase PCR fragment F Plant invertase/pectin methylesterase inhibitor superfamily
Wa8730a016g003000	2.20367	8.5756e-187	1.19561e-182	0.773	0.307	AT1G68530 AT1G25450 AT2G26640 AT1G19440 AT1G71160	CER6, CUT1, G2, KCS6, POP1 CER60, KCS5 KCS11 KCS4 KCS7	Encodes KCS6, a member of the 3-ketoacyl-CoA synthase family involved in the biosynthesis of VLCFA (very long chain fatty acids). Encodes KCS5, a member of the 3-ketoacyl-CoA synthase family involved in the biosynthesis of VLCFA (very long chain fatty acids). Encodes KCS11, a member of the 3-ketoacyl-CoA synthase family involved in the biosynthesis of VLCFA (very long chain fatty acids). Encodes …
Wa8730a007g005460	1.49036	1.96042e-127	2.73322e-123	0.739	0.334
Wa8730a016g002030	1.49325	2.75652e-119	3.84313e-115	0.683	0.347
Wa8730a001g011890	2.10209	4.22314e-205	5.8879e-201	0.835	0.405	AT5G59530 AT2G44800 AT5G43450		2-oxoglutarate (2OG) and Fe(II)-dependent oxygenase superfamily protein 2-oxoglutarate (2OG) and Fe(II)-dependent oxygenase superfamily protein encodes a protein whose sequence is similar to ACC oxidase
Wa8730a009g002590	1.25018	1.04278e-82	1.45384e-78	0.709	0.427	AT3G16770 AT2G47520 AT3G23220 AT1G53910	ATEBP, EBP, ERF72, RAP2.3 AtERF71, ERF71, HRE2 ESE1 RAP2.12	Encodes a member of the ERF (ethylene response factor) subfamily B-2 of the plant specific ERF/AP2 transcription factor family (RAP2.3). The protein contains one AP2 domain. There are 5 members in this subfamily including RAP2.2 AND RAP2.12.It is localized to the nucleus and acts as a transcriptional activator through the GCC-box. It has been identified as a suppressor of Bax-induced cell death b…
Wa8730a007g009040	1.00407	4.99069e-58	6.95802e-54	0.685	0.455	AT1G35140 AT5G09440	EXL1, PHI-1 EXL4	At1g35140 (At1g35140/T32G9_32) mRNA, complete cds EXORDIUM like 4
Wa8730a017g002730	1.25419	3.46907e-97	4.83658e-93	0.752	0.501	AT1G75600 AT1G13370		Histone superfamily protein Histone superfamily protein
Wa8730a004g007430	3.16984	0	0	0.938	0.516
Wa8730a020g001820	1.48482	2.5218e-136	3.51589e-132	0.8	0.538	AT1G22530	PATL2	PATELLIN 2
Wa8730a001g008130	1.31545	4.01713e-89	5.60068e-85	0.759	0.552	AT5G11070
Wa8730a009g001590	1.30522	5.09992e-119	7.11031e-115	0.88	0.556	AT3G55500 AT5G05290 AT5G39280 AT2G37640 AT2G28950 AT2G40610 AT5G02260	ATEXP16, ATEXPA16, ATHEXP, EXP16, EXPA16 ATEXP2, ATEXPA2, ATHEXP, EXP2, EXPA2 ATEXP23, ATEXPA23, ATHEXP, EXPA23 ATEXP3, ATEXPA3, ATHEXP, EXP3 ATEXP6, ATEXPA6, ATHEXP, EXPA6 ATEXP8, ATEXPA8, ATHEXP, EXP8, EXPA8 ATEXP9, ATEXPA9, ATHEXP, EXP9, EXPA9	expansin-like protein. Naming convention from the Expansin Working Group (Kende et al, 2004. Plant Mol Bio). Involved in the formation of nematode-induced syncytia in roots of Arabidopsis thaliana. Encodes an expansin. Naming convention from the Expansin Working Group (Kende et al, 2004. Plant Mol Bio) member of Alpha-Expansin Gene Family. Naming convention from the Expansin Working Group (Kende …
Wa8730a008g000650	2.68054	2.66643e-275	3.71753e-271	0.928	0.593
Wa8730a007g002540	1.22758	7.73663e-101	1.07864e-96	0.825	0.608	AT3G23820 AT2G47650	GAE6 UXS4	UDP-D-glucuronate 4-epimerase encodes a protein similar to UDP-glucuronic acid decarboxylase. UDP-glucuronic acid decarboxylase produces UDP-xylose, which is a substrate for many cell wall carbohydrates including hemicellulose and pectin. UDP-xylose is also known to feedback regulate several cell wall biosynthetic enzymes.
Wa8730a008g003960	2.75018	8.3949e-172	1.17042e-167	0.885	0.612
Wa8730a009g005630	2.26888	2.24476e-245	3.12964e-241	0.913	0.633
Wa8730a002g008940	1.40109	1.09515e-159	1.52686e-155	0.951	0.814	AT4G01470 AT5G47450 AT1G17810 AT4G17340 AT2G36830 AT1G31885	ATTIP1.3, GAMMA-TIP3, TIP1 3 ATTIP2 3, DELTA-TIP3, TIP2 3 BETA-TIP DELTA-TIP2, TIP2 2 GAMMA-TIP, GAMMA-TIP1, TIP1 1 NIP3 1	Encodes AtTIP1 3, functions as water and urea channels in pollen. Tonoplast intrinsic protein, transports ammonium (NH3) and methylammonium across the tonoplast membrane, gene expression shows diurnal regulation and is upregulated by ammonium (NH3). beta-tonoplast intrinsic protein (beta-TIP) mRNA, complete tonoplast intrinsic protein 2 2 Encodes a tonoplast intrinsic protein, which functions as …
Wa8730a006g007440	1.06493	7.10221e-139	9.90191e-135	0.93	0.844	AT1G72360 AT1G53910 AT3G14230	AtERF73, ERF73, HRE1 RAP2.12 RAP2.2	encodes a member of the ERF (ethylene response factor) subfamily B-2 of ERF/AP2 transcription factor family. The protein contains one AP2 domain. There are 5 members in this subfamily including RAP2.2 AND RAP2.12. encodes a member of the ERF (ethylene response factor) subfamily B-2 of ERF/AP2 transcription factor family (RAP2.12). The protein contains one AP2 domain. There are 5 members in this s…
Wa8730a008g003940	1.50336	5.82931e-88	8.12722e-84	0.986	0.981
Wa8730a004g004940	1.49216	1.01905e-143	1.42075e-139	0.288	0.003	AT2G20835
Wa8730a004g004950	1.1546	2.26657e-125	3.16005e-121	0.253	0.003	AT2G20835
Wa8730a002g009040	1.02045	3.2613e-133	4.5469e-129	0.276	0.006
Wa8730a017g003810	1.00047	4.17007e-119	5.81391e-115	0.256	0.007
Wa8730a009g004870	3.02998	9.39954e-46	1.31048e-41	0.132	0.013
Wa8730a016g000380	1.30346	2.75054e-57	3.8348e-53	0.165	0.017	AT1G69640 AT1G14290	SBH1 SBH2	Encodes one of the two redundant sphingoid base hydroxylases (SBH). Involved in sphingolipid trihydroxy long-chain base (4-hydroxysphinganine) biosynthesis. Double mutants of SBHs were dwarfed and not able to progress from vegetative to reproductive growth. Encodes one of the two redundant sphingoid base hydroxylases (SBH). Involved in sphingolipid trihydroxy long-chain base (4-hydroxysphinganine…
Wa8730a005g001350	1.57019	1.06179e-39	1.48035e-35	0.141	0.022	AT4G32320 AT1G14540 AT1G71695 AT1G68850 AT5G19890 AT2G37130 AT1G44970 AT4G36430 AT1G49570	APX6 PER4	Encodes a cytosolic ascorbate peroxidase APX6. Ascorbate peroxidases are enzymes that scavenge hydrogen peroxide in plant cells. Eight types of APX have been described for Arabidopsis: three cytosolic (APX1, APX2, APX6), two chloroplastic types (stromal sAPX, thylakoid tAPX), and three microsomal (APX3, APX4, APX5) isoforms. Peroxidase superfamily protein Peroxidase superfamily protein Peroxidase…
Wa8730a013g004070	1.19878	3.22945e-139	4.50251e-135	0.336	0.022	AT5G23210 AT5G08260 AT3G63470	SCPL34 scpl35 scpl40	serine carboxypeptidase-like 34 serine carboxypeptidase-like 35 serine carboxypeptidase-like 40
Wa8730a002g004140	1.06756	2.14695e-120	2.99328e-116	0.321	0.029	AT2G17730 AT1G74410 AT4G35840 AT5G37270 AT5G66070	NIP2	Intrinsic thylakoid membrane protein that fixes RPOTmp on the stromal side of the thylakoid membrane. RING/U-box superfamily protein RING/U-box superfamily protein RING/U-box superfamily protein RING/U-box superfamily protein
Wa8730a004g002680	1.4497	1.33295e-178	1.8584e-174	0.43	0.034
Wa8730a007g002350	1.10886	1.23735e-121	1.72512e-117	0.338	0.036
Wa8730a003g003270	1.02106	3.20938e-65	4.47452e-61	0.261	0.051	AT5G64260	EXL2	EXORDIUM like 2
Wa8730a015g003450	1.2701	2.59357e-122	3.61596e-118	0.408	0.068	AT4G12920 AT3G02740 AT5G10770	UND	Eukaryotic aspartyl protease family protein Eukaryotic aspartyl protease family protein Eukaryotic aspartyl protease family protein
Wa8730a008g000510	2.83352	4.22891e-135	5.89595e-131	0.436	0.081
Wa8730a008g005450	1.04115	7.47838e-70	1.04264e-65	0.327	0.085
Wa8730a001g004140	1.04633	3.73678e-93	5.20982e-89	0.401	0.099	AT4G02100 AT2G47440 AT1G02650 AT3G62570		Heat shock protein DnaJ with tetratricopeptide repeat Tetratricopeptide repeat (TPR)-like superfamily protein Tetratricopeptide repeat (TPR)-like superfamily protein Tetratricopeptide repeat (TPR)-like superfamily protein
Wa8730a002g005100	2.89286	7.39333e-09	0.000103078	0.172	0.105
Wa8730a020g003060	1.24483	2.25792e-109	3.14799e-105	0.442	0.106	AT1G24360		NAD(P)-binding Rossmann-fold superfamily protein
Wa8730a011g000210	1.29271	8.51995e-98	1.18785e-93	0.439	0.122	AT5G16240 AT3G02630		Plant stearoyl-acyl-carrier-protein desaturase family protein Plant stearoyl-acyl-carrier-protein desaturase family protein
Wa8730a019g003580	1.05957	3.05031e-81	4.25274e-77	0.42	0.13	AT3G17120
Wa8730a005g002930	1.02943	2.78663e-58	3.88512e-54	0.367	0.13	AT5G11650		alpha/beta-Hydrolases superfamily protein
Wa8730a016g002580	1.48927	2.96152e-140	4.12896e-136	0.549	0.134	AT1G65820		microsomal glutathione s-transferase, putative
Wa8730a002g001270	1.05784	1.19031e-71	1.65953e-67	0.416	0.14
Wa8730a011g003900	1.14884	1.24104e-71	1.73025e-67	0.422	0.145	AT4G34480 AT5G67460 AT4G26830 AT5G55180		O-Glycosyl hydrolases family 17 protein O-Glycosyl hydrolases family 17 protein O-Glycosyl hydrolases family 17 protein O-Glycosyl hydrolases family 17 protein
Wa8730a001g009150	1.0888	4.92031e-80	6.85989e-76	0.444	0.151
Wa8730a012g003470	2.55677	1.26206e-206	1.75956e-202	0.647	0.156	AT1G53830 AT3G14310 AT4G33220 AT5G49180 AT5G20860 AT3G43270	ATPME2, PME2 ATPME3, OZS2, PME3 ATPME44, PME44	encodes a pectin methylesterase encodes a pectin methylesterase, targeted by a cellulose binding protein (CBP) from the parasitic nematode Heterodera schachtii during parasitism. pectin methylesterase 44 Encodes a putative pectin methylesterase. The gene is preferentially expressed in floral buds. Plant invertase/pectin methylesterase inhibitor superfamily Plant invertase/pectin methylesterase in…
Wa8730a011g000700	1.24959	1.14583e-111	1.59751e-107	0.519	0.162	AT3G03150 AT5G17165
Wa8730a004g007170	1.24273	8.33611e-88	1.16222e-83	0.483	0.169	AT1G06460	ACD31.2, ACD32.1	ACD32.1 encodes an alpha-crystallin domain containing protein with homology to small heat shock proteins.
Wa8730a001g000420	1.00877	4.59762e-53	6.41e-49	0.408	0.169	AT3G05970 AT2G47240 AT1G64400	ATLACS6, LACS6 CER8, LACS1 LACS3	encode peroxisomal long-chain acyl-CoA synthetase (LACS) isozymes Encodes an acyl-CoA synthetase that acts on long-chain and very-long-chain fatty acids, involved in cuticular wax and cutin biosynthesis AMP-dependent synthetase and ligase family protein
Wa8730a012g003090	1.32932	1.82619e-113	2.54607e-109	0.535	0.175	AT3G02780	IDI2, IPIAT1, IPP2	Encodes a protein with isopentenyl diphosphate:dimethylallyl diphosphate isomerase activity. There is genetic evidence that it functions in the mevalonate, but not the MEP biosynthetic pathway.
Wa8730a006g001790	1.03599	1.74473e-72	2.4325e-68	0.467	0.175	AT3G22310 AT5G40490 AT1G15830	ATRH9, PMH1	Sequence similarity ot DEAD-box RNA helicases. Binds RNA and DNA. Involved in drought, salt and cold stress responses. HLP1 is a member of the conserved hnRNP A/B family and contains RNA Recognition Motifs (RRM).It binds mRNA and appears to be involved in targeting alternative polyadenylation (APA). APA targets include genes involved in flowering. Loss of HLP1 function results causes late floweri…
Wa8730a018g001250	1.00262	1.74681e-74	2.4354e-70	0.47	0.179	AT3G56130		biotin/lipoyl attachment domain-containing protein
Wa8730a016g002540	1.44795	1.64778e-128	2.29733e-124	0.585	0.183	AT1G65820		microsomal glutathione s-transferase, putative
Wa8730a006g006410	1.47995	3.41971e-138	4.76776e-134	0.603	0.188	AT1G21900	p24delta5	Encodes an ER-localized p24 protein. Interacts with p24beta2 at ER export sites for ER exit and coupled transport to the Golgi apparatus. Once in the Golgi, p24delta5 interacts very efficiently with the COPI machinery for retrograde transport back to the ER.
Wa8730a001g003100	1.39516	2.24739e-115	3.13331e-111	0.565	0.204	AT4G03180 AT3G06390		Uncharacterised protein family (UPF0497)
Wa8730a004g008850	1.0516	1.00888e-52	1.40657e-48	0.503	0.253	AT2G25490 AT5G25350 AT3G15770 AT1G15350 AT4G32342	EBF1, FBL6 EBF2	Encodes an F-box protein involved in the ubiquitin/proteasome-dependent proteolysis of EIN3. Arabidopsis thaliana EIN3-binding F-box protein 2 (EBF2) mRNA. Part of the SCF complex, it is located in the nucleus and is involved in the ethylene-response pathway.
Wa8730a003g001170	1.0387	3.17507e-56	4.42668e-52	0.616	0.356
Wa8730a007g000310	1.01169	3.48939e-59	4.86491e-55	0.655	0.394	AT2G36090		F-box family protein
Wa8730a009g000250	1.16084	4.25665e-104	5.93462e-100	0.789	0.583
Wa8730a016g003850	1.00898	4.56205e-110	6.36041e-106	0.905	0.682	AT5G17330 AT1G65960 AT2G02010 AT3G17760	GAD, GAD1 GAD2 GAD4 GAD5	Encodes one of two isoforms of glutamate decarboxylase. glutamate decarboxylase (GAD2) glutamate decarboxylase 4 glutamate decarboxylase 5
Wa8730a009g006620	1.23388	4.56263e-162	6.36122e-158	0.956	0.88	AT2G21660 AT4G39260 AT3G03920 AT2G14160	ATGRP7, CCR2, GR-RBP7, GRP7 ATGRP8, CCR1, GR-RBP8, GRP8	Encodes a small glycine-rich RNA binding protein that is part of a negative-feedback loop through which AtGRP7 regulates the circadian oscillations of its own transcript. Gene expression is induced by cold. GRP7 appears to promote stomatal opening and reduce tolerance under salt and dehydration stress conditions, but, promotes stomatal closing and thereby increases stress tolerance under conditio…

## Sheet: SC B DEGs
Dataset S1. Differentially Expressed Genes for Dusk Supercluster B
Genes showing significant differential expression (log2 FC>1 & p_val_adj <0.05 & PCT1 > 10%) in the given supercluster versus all other cells in the dataset
PCT1: Percentage of cells within the Supercluster expressing the gene
PCT2: Percentage of cells outside the Supercluster expressing the gene
DEGs also of Dawn Supercluster B
Gene	Ave. Log2 FC	p Value	p Value Adj.	PCT1	PCT2	Arabidopsis orthologues	Arabidopsis gene names	Arabidopsis gene description
Wa8730a010g004740	1.59136	1.63131e-82	2.27437e-78	0.185	0.009	AT4G09600 AT1G10588	GASA3	One of GASA gene family which is related to a GA-stimulated transcript (GAST) from tomato. Encodes a Gibberellin-regulated GASA/GAST/Snakin family protein
Wa8730a010g004750	3.70128	5.12967e-132	7.15178e-128	0.366	0.043	AT4G09600 AT1G10588	GASA3	One of GASA gene family which is related to a GA-stimulated transcript (GAST) from tomato. Encodes a Gibberellin-regulated GASA/GAST/Snakin family protein
Wa8730a005g003780	1.30809	4.8266e-35	6.72925e-31	0.184	0.047	AT4G23630 AT4G11220 AT5G41600 AT1G64090 AT4G01230 AT2G46170 AT3G61560	BTI1, RTNLB1 BTI2, RTNLB2 BTI3, RTNLB4 RTNLB3	VIRB2-interacting protein 1 VIRB2-interacting protein 2 VIRB2-interacting protein 3 Reticulan like protein B3 Reticulon family protein Reticulon family protein Reticulon family protein
Wa8730a002g003250	1.12438	1.20111e-36	1.67459e-32	0.199	0.051	AT1G12090 AT4G00165 AT4G22460 AT2G45180 AT1G62510 AT5G46900 AT4G12510	ELP	extensin-like protein (ELP) Bifunctional inhibitor/lipid-transfer protein/seed storage 2S albumin superfamily protein Bifunctional inhibitor/lipid-transfer protein/seed storage 2S albumin superfamily protein Bifunctional inhibitor/lipid-transfer protein/seed storage 2S albumin superfamily protein Bifunctional inhibitor/lipid-transfer protein/seed storage 2S albumin superfamily protein Bifunctiona…
Wa8730a010g004730	2.47207	8.1047e-90	1.12996e-85	0.311	0.052	AT4G09600 AT1G10588	GASA3	One of GASA gene family which is related to a GA-stimulated transcript (GAST) from tomato. Encodes a Gibberellin-regulated GASA/GAST/Snakin family protein
Wa8730a006g002770	3.07348	1.13149e-58	1.57753e-54	0.292	0.076	AT1G22450	ATCOX6B2, COX6B	subunit 6b of cytochrome c oxidase
Wa8730a009g004140	1.25033	5.04616e-62	7.03535e-58	0.305	0.077	AT5G16730 AT3G05900		Encodes a microtubule-associated protein. The mRNA is cell-to-cell mobile. neurofilament protein-related
Wa8730a006g001200	1.67093	1.84304e-113	2.56957e-109	0.465	0.103	AT3G22120 AT4G15160 AT1G62500	CWLP	cell wall-plasma membrane linker protein homolog (CWLP) Bifunctional inhibitor/lipid-transfer protein/seed storage 2S albumin superfamily protein Bifunctional inhibitor/lipid-transfer protein/seed storage 2S albumin superfamily protein
Wa8730a010g002220	3.12037	8.1292e-136	1.13337e-131	0.512	0.117	AT5G53880
Wa8730a005g004460	1.34792	2.23885e-101	3.1214e-97	0.53	0.153	AT2G34070 AT1G29050 AT2G42570 AT2G31110 AT3G14850	TBL37 TBL38 TBL39 TBL40 TBL41	Encodes a member of the TBL (TRICHOME BIREFRINGENCE-LIKE) gene family containing a plant-specific DUF231 (domain of unknown function) domain. TBL gene family has 46 members, two of which (TBR/AT5G06700 and TBL3/AT5G01360) have been shown to be involved in the synthesis and deposition of secondary wall cellulose, presumably by influencing the esterification state of pectic polymers. A nomenclature…
Wa8730a005g003250	2.29138	2.41894e-83	3.37249e-79	0.499	0.199	AT1G73190 AT3G16240 AT4G01470 AT2G36830 AT2G25810 AT1G52180	ALPHA-TIP, TIP3 1 AQP1, ATTIP2 1, DELTA-TIP, DELTA-TIP1, TIP2 1 ATTIP1.3, GAMMA-TIP3, TIP1 3 GAMMA-TIP, GAMMA-TIP1, TIP1 1 TIP4 1	Moves to the Protein Storage Vacuole in a Golgi independent manner Delta tonoplast intrinsic protein, functions as a water channel and ammonium (NH3) transporter. Highly expressed in flower, shoot, and stem. Expression shows diurnal regulation and is induced by ammonium (NH3). Protein localized to vacuolar membrane. Encodes AtTIP1 3, functions as water and urea channels in pollen. Encodes a tonop…
Wa8730a012g004140	1.26843	1.69161e-18	2.35844e-14	0.358	0.222	AT5G37600 AT3G17820 AT1G66200 AT1G48470	ATGLN1 1, ATGSR1, GLN1 1, GSR ATGSKB6, GLN1.3, GLN1 3 ATGSR2, GLN1 2, GSR2 GLN1 5	encodes a cytosolic glutamine synthetase, the enzyme has high affinity with substrate ammonium encodes a cytosolic glutamine synthetase, the enzyme has low affinity with substrate ammonium encodes a cytosolic glutamate synthetase, this enzyme has low affinity with substrate ammonium Encodes cytosolic glutamine synthase isozyme. Expression of mRNA is not detectable in roots.
Wa8730a020g003110	1.88728	5.47181e-12	7.6288e-08	0.328	0.23	AT1G24577
Wa8730a015g000790	1.13172	1.95501e-38	2.72568e-34	0.478	0.241	AT5G48070 AT2G18800 AT4G30270 AT4G25810 AT5G57550	ATXTH20, XTH20 ATXTH21, XTH21 MERI-5, MERI5B, SEN4, XTH24 XTH23, XTR6 XTH25, XTR3	putative xyloglucan endotransglycosylase/hydrolase, expressed primarily in the stele of mature non-elongating regions of both the main and the lateral root. Is expressed in lateral root primordia but expression ceases after lateral root begins to grow. xyloglucan endotransglucosylase/hydrolase 21 encodes a protein similar to endo xyloglucan transferase in sequence. It is also very similar to BRU1…
Wa8730a014g005090	1.224	2.59939e-63	3.62406e-59	0.552	0.247	AT1G12090 AT4G00165 AT4G22460 AT1G62510 AT2G45180 AT4G12510	ELP	extensin-like protein (ELP) Bifunctional inhibitor/lipid-transfer protein/seed storage 2S albumin superfamily protein Bifunctional inhibitor/lipid-transfer protein/seed storage 2S albumin superfamily protein Bifunctional inhibitor/lipid-transfer protein/seed storage 2S albumin superfamily protein Bifunctional inhibitor/lipid-transfer protein/seed storage 2S albumin superfamily protein Encodes a m…
Wa8730a005g004040	2.11037	8.13363e-112	1.13399e-107	0.654	0.262	AT2G46330 AT3G61640 AT5G53250	AGP16, ATAGP16 AGP20, AtAGP20 AGP22, ATAGP22	Encodes arabinogalactan protein (AGP16). arabinogalactan protein 20 arabinogalactan protein 22
Wa8730a015g000860	1.17692	1.52583e-51	2.12731e-47	0.621	0.342	AT5G48070 AT2G18800 AT4G30270 AT4G25810 AT5G57550	ATXTH20, XTH20 ATXTH21, XTH21 MERI-5, MERI5B, SEN4, XTH24 XTH23, XTR6 XTH25, XTR3	putative xyloglucan endotransglycosylase/hydrolase, expressed primarily in the stele of mature non-elongating regions of both the main and the lateral root. Is expressed in lateral root primordia but expression ceases after lateral root begins to grow. xyloglucan endotransglucosylase/hydrolase 21 encodes a protein similar to endo xyloglucan transferase in sequence. It is also very similar to BRU1…
Wa8730a017g003860	1.95233	2.13857e-132	2.9816e-128	0.783	0.416	AT1G29930 AT5G54270	AB140, CAB1, CAB140, LHCB1.3 LHCB3, LHCB3*1	Subunit of light-harvesting complex II (LHCII),which absorbs light and transfers energy to the photosynthetic reaction center. Lhcb3 protein is a component of the main light harvesting chlorophyll a/b-protein complex of Photosystem II (LHC II).
Wa8730a009g000730	1.80093	5.42813e-59	7.5679e-55	0.644	0.418	AT3G46010 AT5G59890 AT4G00680	ADF1, ATADF1, atadf ADF4, ATADF4 ADF8	Actin-depolymerizing factor (ADF) and cofilin define a family of actin-binding proteins essential for the rapid turnover of filamentous actin in vivo. actin depolymerizing factor 4 (ADF4) mRNA, complete cds actin depolymerizing factor 8
Wa8730a016g002350	1.04031	1.60651e-47	2.23979e-43	0.692	0.434	AT1G37130 AT1G77760	ATNR2, B29, CHL3, NIA2, NIA2-1, NR, NR2 GNR1, NIA1, NR1	Identified as a mutant resistant to chlorate. Encodes nitrate reductase structural gene. Involved in nitrate assimilation. Has nitrate reductase activity. Up-regulated by the fungus P. indica. Binds transcription factor At2g35940. Encodes the cytosolic minor isoform of nitrate reductase (NR). Involved in the first step of nitrate assimilation, it contributes about 15% of the nitrate reductase act…
Wa8730a012g005370	1.52577	2.30985e-114	3.2204e-110	0.779	0.441	AT3G47470	CAB4, LHCA4	Encodes a chlorophyll a/b-binding protein that is more similar to the PSI Cab proteins than the PSII cab proteins. The predicted protein is about 20 amino acids shorter than most known Cab proteins.
Wa8730a006g005790	1.63497	1.08147e-93	1.50779e-89	0.762	0.483	AT1G15820	CP24, LHCB6	Lhcb6 protein (Lhcb6), light harvesting complex of photosystem II.
Wa8730a006g002780	3.13948	7.99732e-52	1.11499e-47	0.749	0.554
Wa8730a007g002830	1.26432	6.03142e-99	8.409e-95	0.869	0.724
Wa8730a009g004480	1.15327	8.36615e-140	1.16641e-135	0.971	0.907
Wa8730a005g003170	1.91059	1.87179e-152	2.60965e-148	0.995	0.954	AT1G73190 AT3G16240 AT4G01470 AT2G36830 AT2G25810 AT1G52180	ALPHA-TIP, TIP3 1 AQP1, ATTIP2 1, DELTA-TIP, DELTA-TIP1, TIP2 1 ATTIP1.3, GAMMA-TIP3, TIP1 3 GAMMA-TIP, GAMMA-TIP1, TIP1 1 TIP4 1	Moves to the Protein Storage Vacuole in a Golgi independent manner Delta tonoplast intrinsic protein, functions as a water channel and ammonium (NH3) transporter. Highly expressed in flower, shoot, and stem. Expression shows diurnal regulation and is induced by ammonium (NH3). Protein localized to vacuolar membrane. Encodes AtTIP1 3, functions as water and urea channels in pollen. Encodes a tonop…
Wa8730a009g002620	1.21164	5.31763e-17	7.41383e-13	0.99	0.986
Wa8730a010g003550	1.07333	8.35988e-107	1.16553e-102	1	0.997	AT1G67090 AT5G38410	RBCS1A RBCS3B	Encodes a member of the Rubisco small subunit (RBCS) multigene family: RBCS1A (At1g67090), RBCS1B (At5g38430), RBCS2B (At5g38420), and RBCS3B (At5g38410). Functions to yield sufficient Rubisco content for leaf photosynthetic capacity. Encodes a member of the Rubisco small subunit (RBCS) multigene family: RBCS1A (At1g67090), RBCS1B (At5g38430), RBCS2B (At5g38420), and RBCS3B (At5g38410). Functions…
Wa8730a018g000770	1.02949	1.12024e-68	1.56185e-64	0.221	0.029	AT2G37330	ALS3	Encodes an ABC transporter-like protein, without an ATPase domain, required for aluminum (Al) resistance/tolerance and may function to redistribute accumulated Al away from sensitive tissues in order to protect the growing root from the toxic effects of Al.
Wa8730a006g001380	1.14949	9.09212e-70	1.26762e-65	0.342	0.088
Wa8730a017g001020	1.27715	2.18321e-69	3.04383e-65	0.388	0.117	AT1G01490		Heavy metal transport/detoxification superfamily protein
Wa8730a013g004640	1.22594	3.26228e-51	4.54827e-47	0.347	0.12	AT3G09840 AT3G53230 AT5G03340 AT3G54830	ATCDC48, CDC48, CDC48A AtCDC48B AtCDC48C	Encodes a cell division cycle protein, a member of AAA-type ATPases gene family. Expressed throughout the plant in regions of cell division. Within the cell, sub-cellular localization varies depending on the stage of the cell cycle.Mutants in which the expression of CDC48A is altered show defects in cytokinesis, cell expansion and cell differentiation. CDC48 is induced upon oilseed rape mosaic to…
Wa8730a008g005160	1.12232	8.70583e-53	1.21377e-48	0.358	0.122	AT4G37800 AT1G11545 AT4G03210	XTH7 XTH8 XTH9	xyloglucan endotransglucosylase/hydrolase 7 xyloglucan endotransglucosylase/hydrolase 8 encodes a member of xyloglucan endotransglucosylase/hydrolases (XTHs) that catalyze the cleavage and molecular grafting of xyloglucan chains function in loosening and rearrangement of the cell wall. Gene is expressed in shoot apex region, flower buds, flower stalks and internodes bearing flowers.
Wa8730a004g004970	1.34621	9.50233e-53	1.32481e-48	0.473	0.214	AT1G29920 AT2G34430 AT1G61520 AT3G27690 AT5G54270	AB165, CAB2, LHCB1.1 LHB1B1, LHCB1.4 LHCA3 LHCB2, LHCB2.3, LHCB2.4 LHCB3, LHCB3*1	Encodes lhcb1.1 a component of the LHCIIb light harvesting complex associated with photosystem II. Photosystem II type I chlorophyll a/b-binding protein PSI type III chlorophyll a/b-binding protein (Lhca3*1) Encodes Lhcb2.4. Belongs to the Lhc super-gene family encodes the light-harvesting chlorophyll a/b-binding (LHC) proteins that constitute the antenna system of the photosynthetic apparatus. L…
Wa8730a005g007220	1.19986	2.04305e-47	2.84842e-43	0.478	0.227	AT1G29930 AT3G27690	AB140, CAB1, CAB140, LHCB1.3 LHCB2, LHCB2.3, LHCB2.4	Subunit of light-harvesting complex II (LHCII),which absorbs light and transfers energy to the photosynthetic reaction center. Encodes Lhcb2.4. Belongs to the Lhc super-gene family encodes the light-harvesting chlorophyll a/b-binding (LHC) proteins that constitute the antenna system of the photosynthetic apparatus.
Wa8730a013g004500	1.3954	5.01496e-61	6.99185e-57	0.514	0.243	AT5G62700 AT5G44340 AT5G23860	TUB3 TUB4 TUB8	encodes tubulin beta-2/beta-3 chain beta tubulin gene beta-tubulin, preferentially expressed in endodermal and phloem cells of primary roots and in the vascular tissues of leaves, stems, and flowers.
Wa8730a013g005950	1.58184	3.31672e-94	4.62417e-90	0.628	0.275	AT3G53420 AT1G01620 AT4G00430 AT2G37170 AT3G54820	AtPIP2 1, PIP2, PIP2 1, PIP2A PIP1 3, PIP1C, TMP-B PIP1 4, PIP1E, TMP-C PIP2 2, PIP2B PIP2 5, PIP2D	a member of the plasma membrane intrinsic protein subfamily PIP2. localizes to the plasma membrane and exhibits water transport activity in Xenopus oocyte. expressed specifically in the vascular bundles and protein level increases slightly during leaf dev. When expressed in yeast cells can conduct hydrogen peroxide into those cells. a member of the plasma membrane intrinsic protein subfamily PIP1…
Wa8730a014g000600	1.17323	1.32485e-13	1.84711e-09	0.417	0.329
Wa8730a008g004210	1.16518	5.77336e-33	8.04921e-29	0.605	0.396	AT4G21960	PRXR1	Encodes AT4g21960 (AT4g21960/T8O5_170).
Wa8730a001g006760	1.08518	1.32368e-34	1.84547e-30	0.632	0.423
Wa8730a004g001700	1.32966	2.71797e-53	3.7894e-49	0.736	0.504	AT5G60490 AT5G44130 AT2G20520	AtFLA12, FLA12 FLA13 FLA6	Encodes a member of fasciclin-like arabinogalactan proteins (FLAs) containing a cell adhesion fasciclin (FAS) domain. Mutations result in altered stem biomechanics with reduced tensile strength and reduced tensile modulus of elasticity, as well as altered cell wall architecture and composition, with increased cellulose microfibril angle, reduced arabinose, galactose and cellulose content. FASCICL…
Wa8730a001g008310	1.719	2.73699e-124	3.81591e-120	0.831	0.552	AT1G15820	CP24, LHCB6	Lhcb6 protein (Lhcb6), light harvesting complex of photosystem II.
Wa8730a009g005910	1.82246	2.56001e-161	3.56916e-157	0.921	0.711	AT5G54270	LHCB3, LHCB3*1	Lhcb3 protein is a component of the main light harvesting chlorophyll a/b-protein complex of Photosystem II (LHC II).
Wa8730a005g005360	1.04434	1.75022e-54	2.44016e-50	0.866	0.75	AT4G20260	ATPCAP1, MDP25, PCAP1	Encodes a Ca2+ and Cu2+ binding protein. N-terminal myristylation on glycine 2 appears to enable it to associate tightly with the plasma membrane. Recombinant PCaP1 interacts strongly with phosphatidylinositol 3,5-bisphosphate (PtdIns(3,5)P2) and PtdIns (3,4,5)P3, and weakly with PtdIns(3,5)P2 and PtdIns(4,5). It also interacts with calmodulin (CaM) in a calcium-dependent manner. CaM does not int…
Wa8730a009g000670	1.29225	5.45929e-108	7.61135e-104	0.907	0.757	AT3G54890 AT3G08940	LHCA1 LHCB4.2	Encodes a component of the light harvesting complex associated with photosystem I. Lhcb4.2 protein (Lhcb4.2, protein involved in the light harvesting complex of photosystem II
Wa8730a017g001190	1.04276	1.88112e-55	2.62266e-51	0.92	0.835
Wa8730a007g005080	1.39996	1.17181e-154	1.63373e-150	0.966	0.863	AT4G10340	LHCB5	photosystem II encoding the light-harvesting chlorophyll a/b binding protein CP26 of the antenna system of the photosynthetic apparatus
Wa8730a001g012480	1.26946	1.33858e-55	1.86625e-51	0.951	0.907	AT2G45960 AT3G53420 AT2G37180 AT5G60660 AT2G39010 AT4G35100	ATHH2, PIP1 2, PIP1B, TMP-A AtPIP2 1, PIP2, PIP2 1, PIP2A PIP2 3, PIP2C, RD28 PIP2 4, PIP2F PIP2 6, PIP2E PIP2 7, PIP3, PIP3A, SIMIP	a member of the plasma membrane intrinsic protein subfamily PIP1. localizes to the plasma membrane and exhibits water transport activity in Xenopus oocyte. expressed ubiquitously and protein level decreases slightly during leaf development. a member of the plasma membrane intrinsic protein subfamily PIP2. localizes to the plasma membrane and exhibits water transport activity in Xenopus oocyte. ex…
Wa8730a006g005330	1.04215	9.38132e-145	1.30794e-140	0.993	0.977	AT1G12900 AT1G42970 AT3G04120	GAPA-2 GAPB GAPC, GAPC-1, GAPC1	glyceraldehyde 3-phosphate dehydrogenase A subunit 2 Encodes chloroplast localized glyceraldehyde-3-phosphate dehydrogenase that can use both NADH and NADPH to reduce 1,3-diphosphate glycerate. It forms A2B2 heterotetramers with GapA forms of the GADPH enzyme. These complexes are active in the light under reducing conditions, but show reduced NADPH-dependent activity in response to oxidized thior…
Wa8730a009g000490	1.19981	2.69353e-143	3.75531e-139	0.997	0.99	AT2G39730 AT5G59250	RCA	Rubisco activase, a nuclear-encoded chloroplast protein that consists of two isoforms arising from alternative splicing in most plants. Required for the light activation of rubisco. Major facilitator superfamily protein

## Sheet: SC C DEGs
Dataset S1. Differentially Expressed Genes for Dusk Supercluster C
Genes showing significant differential expression (log2 FC>1 & p_val_adj <0.05 & PCT1 > 10%) in the given supercluster versus all other cells in the dataset
PCT1: Percentage of cells within the Supercluster expressing the gene
PCT2: Percentage of cells outside the Supercluster expressing the gene
DEGs also of Dawn Supercluster C
Gene	Ave. Log2 FC	p Value	p Value Adj.	PCT1	PCT2	Arabidopsis orthologues	Arabidopsis gene names	Arabidopsis gene description
Wa8730a012g004900	3.12075	0	0	0.754	0.046	AT5G10180 AT1G78000 AT4G08620 AT1G22150	AST68, SULTR2 1 SEL1, SULTR1 2 SULTR1 1 SULTR1 3	Encodes a low-affinity sulfate transporter expressed in the root cap and central cylinder, where it is induced by sulfur starvation. Expression in the shoot vascular system is not induced by sulfur starvation. Encodes a sulfate transporter that can restore sulfate uptake capacity of a yeast mutant lacking sulfate transporter genes. Encodes a sulfate transporter. Contains STAS domain. Expressed in…
Wa8730a009g003530	2.6341	7.00113e-259	9.76097e-255	0.998	0.943	AT2G38530	LP2, LTP2, cdf3	Involved in lipid transfer between membranes. Belongs to a family of Lipid transfer proteins. Sequence similarity to other plant/Arabidopsis LPT genes but highest similarity to LPT1. Stress and pathogen-inducible motifs found in the upstream region. Expressed in flower, leaves and siliques but absent in roots. Predicted to be a member of PR-14 pathogenesis-related protein family with the followin…
Wa8730a006g002120	2.57771	5.21746e-286	7.27419e-282	0.973	0.685	AT5G50200 AT4G24715	ATNRT3.1, NRT3.1, WR3 NA	Wound-responsive gene 3 (WR3). Encodes a high-affinity nitrate transporter. Up-regulated by nitrate. Involved in jasmonic acid-independent wound signal transduction. NA
Wa8730a004g001070	2.09523	1.03933e-192	1.44904e-188	0.855	0.397	AT5G60770 AT1G12940	ATNRT2.4, NRT2.4 ATNRT2.5, NRT2.5	member of High affinity nitrate transporter family member of High affinity nitrate transporter family
Wa8730a017g002540	1.92173	3.6136e-186	5.03808e-182	0.811	0.315	AT2G45960 AT3G61430 AT1G01620 AT4G00430 AT4G23400 AT2G37170 AT2G39010 AT4G35100 AT2G16850	ATHH2, PIP1 2, PIP1B, TMP-A ATPIP1, PIP1, PIP1 1, PIP1A PIP1 3, PIP1C, TMP-B PIP1 4, PIP1E, TMP-C PIP1 5, PIP1D PIP2 2, PIP2B PIP2 6, PIP2E PIP2 7, PIP3, PIP3A, SIMIP PIP2 8, PIP3B	a member of the plasma membrane intrinsic protein subfamily PIP1. localizes to the plasma membrane and exhibits water transport activity in Xenopus oocyte. expressed ubiquitously and protein level decreases slightly during leaf development. a member of the plasma membrane intrinsic protein subfamily PIP1. localizes to the plasma membrane and exhibits water transport activity in Xenopus oocyte. ex…
Wa8730a003g001030	1.76136	1.87747e-138	2.61756e-134	0.797	0.398	AT2G16060	AHB1, ARATH, ATGLB1, GLB1, HB1, NSHB1	Encodes a class 1 nonsymbiotic hemoglobin induced by low oxygen levels with very high oxygen affinity. It is not likely to be a hemoglobin transporter because of its extremely high affinity for oxygen.
Wa8730a001g006060	1.76064	3.3164e-173	4.62373e-169	0.639	0.157	AT3G10960	ATAZG1, AZG1	Encodes a homolog of the adenine-guanine-hypoxanthine transporter AzgA of Aspergillus nidulans. Function as a plant adenine-guanine transporter. Two closely related genes exist in Arabidopsis: AT3G10960 (Azg1) and AT5G50300 (Azg2).
Wa8730a003g008790	1.54265	7.04275e-153	9.819e-149	0.586	0.143	AT5G06440 AT3G11720		Polyketide cyclase/dehydrase and lipid transport superfamily protein
Wa8730a008g003840	1.49759	1.28013e-152	1.78476e-148	0.372	0.028	AT4G19690 AT3G12750 AT2G30080 AT1G31260 AT2G32270 AT1G05300 AT2G04032	ATIRT1, IRT1 AtZIP1, ZIP1 ATZIP6, ZIP6 ZIP10 ZIP3 ZIP5 ZIP7	Fe(II) transport protein (IRT1) A member of Zrt- and Irt-related protein (ZIP) family. transcript is induced in response to zinc deficiency in the root. member of Fe(II) transporter isolog family. Gene expression is not regulated by iron, copper, or zinc deficiency or excess. member of Fe(II) transporter isolog family A member of Zrt- and Irt-related protein (ZIP) family. transcript is induced in…
Wa8730a003g004980	1.40481	5.58894e-162	7.7921e-158	0.328	0.009	AT3G51590	LTP12	Encodes a member of the lipid transfer protein family. Proteins of this family are generally small (~9 kD), basic, expressed abundantly and contain eight Cys residues. The proteins can bind fatty acids and acylCoA esters and can transfer several different phospholipids. They are localized to the cell wall. The LTP12 promoter is active exclusively in the tapetum during the uninucleate microspore a…
Wa8730a020g003020	1.09821	1.94444e-77	2.71094e-73	0.751	0.457	AT1G24400 AT5G40780 AT1G67640 AT3G01760	AATL2, ATLHT2, LHT2 LHT1	High-affinity transporter for neutral and acidic amino acids, expressed in tapetum tissue of anthers Encodes LHT1 (lysine histidine transporter), a high-affinity transporter for cellular amino acid uptake in both root epidermis and leaf mesophyll. Transmembrane amino acid transporter family protein Encodes an amino acid transporter expressed in the root that is involved in the uptake of acidic am…
Wa8730a003g000980	2.34385	3.37372e-251	4.70364e-247	0.842	0.259	AT2G22860 AT3G49780 AT4G37720	ATPSK2, PSK2 ATPSK3, ATPSK4, PSK4 ATPSK6, PSK6	Phytosulfokine 2 precursor, coding for a unique plant peptide growth factor. Phytosulfokine 3 precursor, coding for a unique plant peptide growth factor. Plants overexpressing this gene (under a 35S promoter), develop normal cotyledons and hypocotyls but their growth, in particular that of their roots, was faster than that of wildtype. Probable phytosulfokines 6 precursor, coding for a unique pla…
Wa8730a016g002960	1.30741	2.17653e-150	3.03452e-146	0.908	0.685	AT1G22300 AT5G10450 AT1G78300 AT4G09000 AT1G26480 AT5G16050 AT3G02520	14-3-3EPSILON, GF14, GRF10 14-3-3lambda, AFT1, GRF6 14-3-3OMEGA, GF14, GRF2 GF14, GRF1 GF14, GRF12 GF14, GRF5 GF14, GRF7	Encodes a 14-3-3 protein. This protein is reported to interact with the BZR1 transcription factor involved in brassinosteroid signaling and may affect the nucleocytoplasmic shuttling of BZR1 Encodes a member of the 14-3-3 gene family that is a lambda isoform (14-3-3&#955 ). Interacts with APX3 (ascorbate peroxidase) and AKR2 , suggesting a role in mediating oxidative metabolism in stress response…
Wa8730a014g002860	1.29411	1.97426e-145	2.75251e-141	0.495	0.087	AT2G45190 AT1G08465 AT2G26580	AFO, FIL, YAB1 YAB2 YAB5	Encodes a member of the YABBY family of transcriptional regulators that is involved in abaxial cell type specification in leaves and fruits. YAB1 acts in a non-cell autonomous fashion within the meristem to affect phyllotactic patterning. The non-autonomous effect on the central region of the meristem is mediated through the activity if Lateral Suppressor (LAS). Member of the YABBY family of Arab…
Wa8730a015g004370	1.18293	2.73387e-74	3.81156e-70	0.605	0.296	AT3G01470 AT1G69780 AT2G22430	ATHB-1, ATHB1, HAT5, HB-1, HD-ZIP-1 ATHB13 ATHB6, HB6	Encodes a homeodomain leucine zipper class I (HD-Zip I) transcriptional activator involved in leaf development. Encodes a homeodomain leucine zipper class I (HD-Zip I) protein. Encodes a homeodomain leucine zipper class I (HD-Zip I) protein that is a target of the protein phosphatase ABI1 and regulates hormone responses in Arabidopsis.
Wa8730a001g000280	2.86883	0	0	0.779	0.066	AT3G12500 AT4G01700 AT1G02360	ATHCHIB, B-CHI, CHI-B, HCHIB, PR-3, PR3	encodes a basic chitinase involved in ethylene/jasmonic acid mediated signalling pathway during systemic acquired resistance based on expression analyses. Chitinase family protein Chitinase family protein
Wa8730a003g005380	2.18301	1.06675e-184	1.48727e-180	0.567	0.093	AT3G46860 AT5G43570		Predicted to encode a PR (pathogenesis-related) peptide that belongs to the PR-6 proteinase inhibitor family. Six putative PR-6-type protein encoding genes are found in Arabidopsis: At2g38900, At2g38870, At5g43570, At5g43580, At3g50020 and At3g46860. Predicted to encode a PR (pathogenesis-related) peptide that belongs to the PR-6 proteinase inhibitor family. Six putative PR-6-type protein encodin…
Wa8730a010g000690	1.2883	5.0401e-161	7.02691e-157	0.365	0.021	AT4G31800 AT4G22070	ATWRKY18, WRKY18 ATWRKY31, WRKY31	Pathogen-induced transcription factor. Binds W-box sequences in vitro. Forms protein complexes with itself and with WRKY40 and WRKY60. Constitutive expression of WRKY18 enhanced resistance to P. syringae, but its coexpression with WRKY40 or WRKY60 made plants more susceptible to both P. syringae and B. cinerea. WRKY18, WRKY40, and WRKY60 have partially redundant roles in response to the hemibiotr…
Wa8730a001g010580	1.0296	9.69365e-81	1.35149e-76	0.239	0.026	AT3G09590 AT4G33720 AT4G31470		CAP (Cysteine-rich secretory proteins, Antigen 5, and Pathogenesis-related 1 protein) superfamily protein CAP (Cysteine-rich secretory proteins, Antigen 5, and Pathogenesis-related 1 protein) superfamily protein CAP (Cysteine-rich secretory proteins, Antigen 5, and Pathogenesis-related 1 protein) superfamily protein
Wa8730a003g005480	4.48209	0	0	0.958	0.484
Wa8730a008g001000	4.14606	0	0	0.88	0.142
Wa8730a008g000620	3.95917	0	0	0.964	0.356
Wa8730a008g001340	3.4294	1.21498e-218	1.69393e-214	0.751	0.217
Wa8730a014g002170	3.3954	0	0	0.866	0.083
Wa8730a015g000910	2.99399	7.66945e-220	1.06927e-215	0.535	0.052	AT4G31500 AT5G07990	ATR4, CYP83B1, RED1, RNT1, SUR2 CYP75B1, D501, TT7	Encodes an oxime-metabolizing enzyme in the biosynthetic pathway of glucosinolates. Is required for phytochrome signal transduction in red light. Mutation confers auxin overproduction. Required for flavonoid 3' hydroxylase activity.
Wa8730a014g002180	2.74042	0	0	0.742	0.045
Wa8730a001g007090	2.62621	3.2514e-168	4.5331e-164	0.474	0.063	AT2G41480 AT5G05340	AtPRX25, PRX25 PRX52	Encodes a cationic cell-wall-bound peroxidase homolog that is involved in the lignification of cell walls. Encodes a protein with sequence similarity to peroxidases that is involved in lignin biosynthesis. Loss of function mutations show abnormal development of xylem fibers and reduced levels of lignin biosynthetic enxymes.
Wa8730a002g001530	2.51608	2.40746e-284	3.35649e-280	0.876	0.243	AT4G24130		Protein of unknown function, DUF538
Wa8730a001g011180	2.26392	1.03009e-269	1.43615e-265	0.749	0.139	AT5G02540 AT2G37540 AT4G11410		NAD(P)-binding Rossmann-fold superfamily protein NAD(P)-binding Rossmann-fold superfamily protein NAD(P)-binding Rossmann-fold superfamily protein
Wa8730a020g000810	2.25458	1.88795e-190	2.63217e-186	0.423	0.026	AT3G52720 AT2G28210 AT5G04180 AT1G08080	ACA1, ATACA1, CAH1 ACA2, ATACA2 ACA3, ATACA3 ACA7, ATACA7	Encodes a putative alpha carbonic anhydrase (CAH1) located in the chloroplast stroma. Most chloroplast proteins are encoded by the nuclear genome and imported with the help of sorting signals that are intrinsic parts of the polypeptides. CAH1 takes an alternative route through the secretory pathway, and becomes N-glycosylated before entering the chloroplast. alpha carbonic anhydrase 2 alpha carbo…
Wa8730a014g002160	2.25102	6.73918e-282	9.39577e-278	0.571	0.026
Wa8730a001g006770	2.16197	1.92505e-130	2.6839e-126	0.538	0.133
Wa8730a016g003520	2.13599	7.00104e-212	9.76085e-208	0.929	0.653	AT5G37600 AT3G17820 AT5G35630 AT1G66200 AT5G16570 AT1G48470	ATGLN1 1, ATGSR1, GLN1 1, GSR ATGSKB6, GLN1.3, GLN1 3 ATGSL1, GLN2, GS2 ATGSR2, GLN1 2, GSR2 GLN1 4 GLN1 5	encodes a cytosolic glutamine synthetase, the enzyme has high affinity with substrate ammonium encodes a cytosolic glutamine synthetase, the enzyme has low affinity with substrate ammonium chloroplastic glutamine synthetase encodes a cytosolic glutamate synthetase, this enzyme has low affinity with substrate ammonium Encodes a cytosolic glutamine synthetase, the enzyme has high affinity with subs…
Wa8730a016g002860	1.96868	1.18728e-217	1.65531e-213	0.847	0.282	AT1G68610 AT3G18470 AT1G49030	PCR11	Target promoter of the male germline-specific transcription factor DUO1. PLAC8 family protein PLAC8 family protein
Wa8730a007g005010	1.94469	1.34403e-213	1.87384e-209	0.753	0.203	AT1G09400		FMN-linked oxidoreductases superfamily protein
Wa8730a009g003220	1.91316	2.1874e-213	3.04967e-209	0.502	0.038
Wa8730a006g004370	1.87285	2.16114e-207	3.01306e-203	0.506	0.047	AT2G41480 AT5G64120 AT5G66390 AT1G05260 AT2G34060 AT3G21770 AT5G15180 AT5G39580 AT3G03670 AT1G49570	AtPRX25, PRX25 AtPRX71, PRX71 PRX72 RCI3, RCI3A	Encodes a cationic cell-wall-bound peroxidase homolog that is involved in the lignification of cell walls. encodes a cell wall bound peroxidase that is induced by hypo-osmolarity Encodes a peroxidase that is involved in lignin biosynthesis. Encodes a cold-inducible cationic peroxidase that is involved in the stress response. In response to low temperature, RCI3 transcripts accumulate in the aeria…
Wa8730a007g008670	1.86266	4.9167e-153	6.85486e-149	0.768	0.314	AT3G29260 AT4G03140		NAD(P)-binding Rossmann-fold superfamily protein NAD(P)-binding Rossmann-fold superfamily protein
Wa8730a013g001900	1.85988	1.41074e-186	1.96686e-182	0.462	0.04	AT4G12310 AT2G45570 AT2G46660 AT1G01190	CYP706A5 CYP76C2 CYP78A6, EOD3 CYP78A8	member of CYP706A member of CYP76C member of CYP78A member of CYP78A
Wa8730a020g002990	1.84539	1.05283e-245	1.46785e-241	0.985	0.823	AT1G13440 AT3G04120 AT1G79530 AT1G16300	GAPC-2, GAPC2 GAPC, GAPC-1, GAPC1 GAPCP-1 GAPCP-2	The expression level of GAPC-2 is upregulated in Arabidopsis seedlings exposed to cadmium. encodes cytosolic GADPH (C subunit) involved in the glycolytic pathway but also interacts with H2O2 potentially placing it in a signalling cascade induced by ROS. Encodes one of the chloroplast/plastid localized GAPDH isoforms (GAPCp1/At1g79530 and GAPCp2/At1g16300). gapcp double mutants display a drastic p…
Wa8730a005g001430	1.80673	9.5357e-255	1.32947e-250	0.556	0.034	AT1G13140 AT4G39490 AT5G02900 AT4G32170 AT5G52320 AT2G21910 AT1G47620	CYP86C3 CYP96A10 CYP96A13 CYP96A2 CYP96A4 CYP96A5 CYP96A8	member of CYP86C member of CYP96A member of CYP96A member of CYP96A member of CYP96A member of CYP96A member of CYP96A
Wa8730a009g003160	1.78999	2.68942e-225	3.7496e-221	0.593	0.069
Wa8730a006g004140	1.57658	6.54902e-145	9.13065e-141	0.319	0.015	AT2G41480 AT5G64120 AT5G66390 AT1G05260 AT2G22420 AT2G34060 AT3G21770 AT5G15180 AT5G39580 AT1G49570 AT1G14550	AtPRX25, PRX25 AtPRX71, PRX71 PRX72 RCI3, RCI3A	Encodes a cationic cell-wall-bound peroxidase homolog that is involved in the lignification of cell walls. encodes a cell wall bound peroxidase that is induced by hypo-osmolarity Encodes a peroxidase that is involved in lignin biosynthesis. Encodes a cold-inducible cationic peroxidase that is involved in the stress response. In response to low temperature, RCI3 transcripts accumulate in the aeria…
Wa8730a016g001330	1.57297	7.28898e-154	1.01623e-149	0.707	0.217	AT1G22250 AT4G08910 AT1G78170
Wa8730a020g002340	1.43504	3.2173e-113	4.48556e-109	0.798	0.499	AT1G22840	ATCYTC-A, CYTC-1	Encodes cytochrome c. Contains two site II (TGGGCC/T) elements, which interact with a TCP-domain transcription factor, and a downstream internal telomeric repeat, and are required for expression of the Cytc-1 gene. Promoter directs preferential expression in root and shoot meristems and in anthers.
Wa8730a001g007430	1.41104	2.32714e-166	3.24449e-162	0.581	0.116	AT4G25850 AT5G57240	ORP4B ORP4C	OSBP(oxysterol binding protein)-related protein 4B OSBP(oxysterol binding protein)-related protein 4C
Wa8730a009g003140	1.39098	3.60597e-152	5.02744e-148	0.483	0.075
Wa8730a012g000820	1.36688	5.5746e-118	7.7721e-114	0.792	0.467	AT1G71950		SPI-1 is a member of the I9 inhibitor family. It is an inhibitor of SBT4.13 subtilase.
Wa8730a012g005020	1.36129	5.74698e-126	8.01244e-122	0.295	0.017	AT1G14290	SBH2	Encodes one of the two redundant sphingoid base hydroxylases (SBH). Involved in sphingolipid trihydroxy long-chain base (4-hydroxysphinganine) biosynthesis. Double mutants of SBHs were dwarfed and not able to progress from vegetative to reproductive growth.
Wa8730a010g000090	1.34301	1.1516e-103	1.60555e-99	0.854	0.6
Wa8730a003g000340	1.32616	4.51871e-102	6.29998e-98	0.687	0.303	AT3G19450 AT4G34230 AT4G37970	ATCAD4, CAD, CAD-C, CAD4 ATCAD5, CAD-5, CAD5 ATCAD6, CAD6	Encodes a catalytically active cinnamyl alcohol dehydrogenase which uses p-coumaryl aldehyde as a preferred substrate. It can also use caffeyl, coniferyl and d-hydroxyconiferyl aldehydes as substrates. Encodes a catalytically active cinnamyl alcohol dehydrogenase which uses p-coumaryl aldehyde as a preferred substrate. It can also use sinapyl, caffeyl, coniferyl and d-hydroxyconiferyl aldehydes a…
Wa8730a013g005830	1.3176	6.10802e-143	8.5158e-139	0.891	0.657	AT1G04410	c-NAD-MDH1	predicted to encode a cytosolic malate dehydrogenase.
Wa8730a020g000340	1.29182	8.93402e-117	1.24558e-112	0.928	0.634
Wa8730a006g001340	1.28946	1.41825e-100	1.97733e-96	0.797	0.535	AT1G79550	PGK	Encodes cytosolic phosphoglycerate kinase (PGK).
Wa8730a009g004310	1.27678	1.56366e-159	2.18005e-155	0.395	0.032	AT1G02335 AT3G62020 AT1G09560 AT3G05930 AT3G04200	GL22, PDGLP2 GLP10 GLP5, PDGLP1 GLP8	Encodes a plasodesmata-located protein involved in regulating primary root growth by controlling phloem-mediated allocation of resources between the primary and lateral root meristems. germin-like protein (GLP10) germin-like protein (GLP5) germin-like protein (GLP8) RmlC-like cupins superfamily protein
Wa8730a001g007820	1.25603	9.44783e-103	1.31722e-98	0.558	0.186	AT2G18960 AT1G17260 AT5G62670 AT4G30190 AT5G57350 AT2G24520 AT2G07560 AT1G80660	AHA1, HA1, OST2, PMA AHA10 AHA11, HA11 AHA2, HA2, PMA2 AHA3, ATAHA3, HA3 AHA5, HA5 AHA6, HA6 AHA9, HA9	Encodes a plasma membrane proton ATPase. Mutants have a reduced ability to close their stomata in response to drought and are affected in stomatal but not seed responsiveness to ABA. belongs to H+-APTase gene family, involved in proanthocyanidin biosynthesis, disturbs the vacuolar biogenesis and acidification process H(+)-ATPase 11 belongs to the P-type ATPase superfamily of cation-transporting A…
Wa8730a006g003200	1.23279	1.42153e-169	1.9819e-165	0.39	0.024
Wa8730a020g001670	1.19847	3.73543e-81	5.20793e-77	0.665	0.343	AT5G63400 AT4G25280 AT5G50370	ADK1	encodes a protein similar to adenylate kinase. P-loop containing nucleoside triphosphate hydrolases superfamily protein Adenylate kinase family protein
Wa8730a009g000440	1.17272	1.4413e-129	2.00946e-125	0.913	0.71	AT3G55440	ATCTIMC, CYTOTPI, TPI	Encodes triosephosphate isomerase.
Wa8730a001g007510	1.17145	3.49289e-119	4.86979e-115	0.886	0.672	AT1G51650		ATP synthase epsilon chain, mitochondrial
Wa8730a014g001670	1.10881	8.19563e-180	1.14263e-175	0.354	0.009
Wa8730a007g007580	1.0866	1.62064e-70	2.25949e-66	0.538	0.235
Wa8730a013g005820	1.08458	8.23726e-91	1.14844e-86	0.565	0.203	AT3G54690	SETH3	Sugar isomerase (SIS) family protein
Wa8730a013g001590	1.08058	6.47058e-67	9.02128e-63	0.653	0.373
Wa8730a004g003200	1.0713	7.73943e-83	1.07903e-78	0.613	0.246
Wa8730a004g002520	1.06275	5.708e-87	7.95809e-83	0.769	0.478	AT2G31490
Wa8730a002g005420	1.04649	2.74936e-82	3.83315e-78	0.681	0.333	AT5G24760 AT1G64710 AT1G32780 AT5G42250		GroES-like zinc-binding dehydrogenase family protein GroES-like zinc-binding dehydrogenase family protein GroES-like zinc-binding dehydrogenase family protein Zinc-binding alcohol dehydrogenase family protein
Wa8730a013g000340	1.03224	3.265e-133	4.55206e-129	0.283	0.011
Wa8730a007g002110	1.03003	1.43472e-14	2.00029e-10	0.175	0.079
Wa8730a007g000220	1.02738	3.22833e-64	4.50094e-60	0.691	0.424
Wa8730a007g003770	1.02112	5.37209e-76	7.48976e-72	0.737	0.367	AT1G78460		SOUL heme-binding family protein
Wa8730a013g005520	1.01679	3.1273e-99	4.36008e-95	0.422	0.093
Wa8730a014g004370	1.00827	1.30863e-75	1.8245e-71	0.695	0.401	AT4G34700	AtCIB22, CIB22	Encodes the B22 subunit of eukaryotic mitochondrial Complex I. Mutation in the gene display pleiotropic phenotypes including shorter roots, smaller plants and delayed flowering. The mRNA is cell-to-cell mobile.
Wa8730a013g004680	1.57442	1.90694e-213	2.65865e-209	0.464	0.026	AT5G43360 AT2G32830 AT3G54700	ATPT4, PHT1 3, PHT3 PHT1 5, PHT5 PHT1 7	Encodes Pht1 3, a member of the Pht1 family of phosphate transporters which include: Pht1 1/At5g43350, Pht1 2/At5g43370, Pht1 3/At5g43360, Pht1 4/At2g38940, Pht1 5/At2g32830, Pht1 6/At5g43340, Pht1 7/At3g54700, Pht1 8/At1g20860, Pht1 9/At1g76430 (Plant Journal 2002, 31:341). Encodes Pht1 5, a member of the Pht1 family of phosphate transporters which include: Pht1 1/At5g43350, Pht1 2/At5g43370, Ph…
Wa8730a008g004040	1.18049	8.20144e-110	1.14344e-105	0.409	0.076	AT4G19960 AT1G31120 AT2G35060	ATKUP9, HAK9, KT9, KUP9 KUP10 KUP11	Encodes a potassium ion transmembrane transporter. Also mediates cesium uptake when expressed in E. coli. potassium transporter potassium transporter
Wa8730a011g003030	1.14096	2.02009e-96	2.81641e-92	0.314	0.045	AT4G19690 AT3G12750 AT1G31260	ATIRT1, IRT1 AtZIP1, ZIP1 ZIP10	Fe(II) transport protein (IRT1) A member of Zrt- and Irt-related protein (ZIP) family. transcript is induced in response to zinc deficiency in the root. member of Fe(II) transporter isolog family
Wa8730a009g004350	1.10584	1.78034e-144	2.48215e-140	0.313	0.013	AT1G02520 AT3G62150 AT4G01820 AT2G47000	ABCB11, MDR8, PGP11 ABCB21, PGP21 ABCB3, MDR3, PGP3 ABCB4, ATPGP4, AtABCB4, MDR4, PGP4	Encodes an ATP-binding cassette (ABC) transporter. Expressed in the vascular tissue of primary stem. The mRNA is cell-to-cell mobile. Encodes a facultative transporter controlling auxin concentrations in plant cells. member of MDR subfamily Multidrug resistance P-glycoprotein (MDR/PGP) subfamily of ABC transporters. Functions in the basipetal redirection of auxin from the root tip. Exhibits apola…
Wa8730a009g001780	1.3944	1.75092e-131	2.44113e-127	0.531	0.116	AT3G63110 AT5G19040 AT3G23630	ATIPT3, IPT3 ATIPT5, IPT5 ATIPT7, IPT7	Encodes cytokinin synthase involved in cytokinin biosynthesis. IPT3 subcellular localization is modulated by farnesylation- when farnesylated it is localized to the nucleus, otherwise to the chloroplast. Encodes cytokinin synthase. Encodes an isopentenyl transferase involved in cytokinin biosynthesis.
Wa8730a005g006790	1.07453	1.32985e-130	1.85408e-126	0.954	0.831	AT5G63030 AT5G40370	GRXC1 GRXC2	Thioredoxin superfamily protein Glutaredoxin family protein
Wa8730a013g004170	1.75125	5.54732e-163	7.73407e-159	0.557	0.108	AT1G17860		Kunitz family trypsin and protease inhibitor protein
Wa8730a004g003310	1.68226	1.16303e-233	1.62149e-229	0.51	0.031
Wa8730a018g002950	1.63306	3.26e-136	4.54509e-132	0.744	0.331
Wa8730a005g002760	1.41273	7.71534e-140	1.07567e-135	0.55	0.133	AT4G29220 AT4G26270 AT4G32840 AT5G56630	PFK1 PFK3 PFK6 PFK7	phosphofructokinase 1 phosphofructokinase 3 phosphofructokinase 6 phosphofructokinase 7
Wa8730a004g006810	1.365	2.29993e-124	3.20657e-120	0.754	0.321	AT5G44130	FLA13	FASCICLIN-like arabinogalactan protein 13 precursor
Wa8730a017g000040	1.31251	1.22484e-115	1.70767e-111	0.77	0.327
Wa8730a011g003440	1.24764	1.91164e-83	2.66521e-79	0.584	0.242	AT1G30270	ATCIPK23, CIPK23, LKS1, PKS17, SnRK3.23	Arabidopsis thaliana CBL-interacting protein kinase 23. CIPK23 serves as a positive regulator of the potassium transporter AKT1 by directly phosphorylating AKT1. CIPK23 is activated by the binding of two calcineurin B-like proteins, CBL1 and CBL9.
Wa8730a009g004260	1.23403	1.61048e-80	2.24533e-76	0.751	0.466	AT1G02335 AT3G62020 AT1G09560 AT3G05930 AT3G04200	GL22, PDGLP2 GLP10 GLP5, PDGLP1 GLP8	Encodes a plasodesmata-located protein involved in regulating primary root growth by controlling phloem-mediated allocation of resources between the primary and lateral root meristems. germin-like protein (GLP10) germin-like protein (GLP5) germin-like protein (GLP8) RmlC-like cupins superfamily protein
Wa8730a007g001470	1.22811	2.82365e-115	3.93673e-111	0.85	0.625	AT4G25130	MSRA4, PMSR4	Encodes a chloroplast-localized methionine sulfoxide reductase that is a member of the MSRA family. Involved in protection of chloroplasts from oxidative stress.
Wa8730a013g005770	1.20679	5.21465e-108	7.27026e-104	0.463	0.109	AT4G14365 AT3G23280	XBAT34 XBAT35	XB3 ortholog 4 in Arabidopsis thaliana Encodes a ubiquitin ligase that is a novel player in ethylene signaling involved in negatively regulating apical hook curvature, with alternative splicing controlling dual targeting to the nuclear and cytoplasmic compartments.
Wa8730a002g006740	1.20054	4.5825e-79	6.38893e-75	0.485	0.166	AT1G66120 AT2G17650 AT1G21540 AT1G75960	AAE11, AtAAE11	AMP-dependent synthetase and ligase family protein AMP-dependent synthetase and ligase family protein AMP-dependent synthetase and ligase family protein AMP-dependent synthetase and ligase family protein
Wa8730a004g003300	1.17698	5.13413e-159	7.15801e-155	0.326	0.01
Wa8730a015g001580	1.14687	3.44854e-31	4.80795e-27	0.504	0.302	AT4G30280 AT5G48070 AT2G18800 AT4G25810 AT5G57550	ATXTH18, XTH18 ATXTH20, XTH20 ATXTH21, XTH21 XTH23, XTR6 XTH25, XTR3	Encodes a xyloglucan endotransglucosylase/hydrolase with only only the endotransglucosylase (XET EC 2.4.1.207) activity towards xyloglucan and non-detectable endohydrolytic (XEH EC 3.2.1.151) activity. Expressed in the mature or basal regions of both the main and lateral roots, but not in the tip of these roots where cell division occurs. putative xyloglucan endotransglycosylase/hydrolase, expres…
Wa8730a019g003170	1.13689	3.04945e-131	4.25155e-127	0.914	0.653	AT3G10300 AT5G04170		Calcium-binding EF-hand family protein Calcium-binding EF-hand family protein
Wa8730a002g002720	1.13196	1.16801e-81	1.62843e-77	0.679	0.34	AT3G60780 AT2G45360 AT1G62840 AT1G12320 AT5G62280		Protein of unknown function (DUF1442) Protein of unknown function (DUF1442) Protein of unknown function (DUF1442) Protein of unknown function (DUF1442) Protein of unknown function (DUF1442)
Wa8730a003g003040	1.12264	5.34839e-108	7.45672e-104	0.465	0.11	AT5G61130 AT5G08000 AT1G18650 AT1G69295 AT4G13600 AT1G26450 AT1G13830 AT2G03505	AtPDCB1, PDCB1 E13L3, PDCB2 PDCB3 PDCB4	Encodes a plasmodesmatal localized protein with callose binding activity. The function of PDCB1 is unknown but overexpression leads to the hyperaccumulation of callose. Encodes a member of the X8-GPI family of proteins. It localizes to the plasmodesmata and binds callose. Encodes a member of the X8-GPI family of proteins. It localizes to the plasmodesmata and is predicted to bind callose. Encodes…
Wa8730a001g006600	1.12038	3.04219e-83	4.24142e-79	0.66	0.336
Wa8730a006g004380	1.11604	5.2278e-78	7.28859e-74	0.734	0.395	AT3G07570		Cytochrome b561/ferric reductase transmembrane with DOMON related domain
Wa8730a017g002190	1.10021	1.24381e-111	1.73412e-107	0.301	0.029	AT2G17120	CL-1, LYM2, LYP1	Induction of chitin-responsive genes by chitin treatment is not blocked in the mutant. It contains a C-terminal GPI anchor signal and is an ortholog of OsCEBiP.
Wa8730a015g000680	1.07274	2.17048e-69	3.02608e-65	0.722	0.476
Wa8730a008g005720	1.06605	5.84112e-83	8.14369e-79	0.383	0.097
Wa8730a016g000670	1.06477	4.37787e-120	6.10362e-116	0.903	0.746
Wa8730a001g011970	1.05416	1.65183e-86	2.30298e-82	0.701	0.362	AT3G53990		Encodes universal stress protein (USP). Functions as a molecular chaperone under heat shock and oxidative stress conditions. Chaperone activity and assembly into complexes is redox regulated.
Wa8730a007g002730	1.04341	5.48792e-87	7.65126e-83	0.483	0.146
Wa8730a005g008580	1.03965	6.04229e-67	8.42416e-63	0.55	0.26
Wa8730a010g002420	1.03795	2.74198e-61	3.82287e-57	0.656	0.372	AT1G53310 AT2G42600 AT3G14940	ATPEPC1, ATPPC1, PEPC1, PPC1 ATPPC2, PPC2 ATPPC3, PPC3	Encodes one of four Arabidopsis phosphoenolpyruvate carboxylase proteins. Encodes one of four Arabidopsis phosphoenolpyruvate carboxylase proteins. Encodes a cytosolic phosphoenolpyruvate carboxylase (PEPC) that has activity when expressed in E.coli. Its mRNA is most abundantly expressed in roots and siliques. PPC3 belongs to the plant-type PEPC family. It can form an enzymatically active complex…
Wa8730a017g003130	1.03628	3.51145e-74	4.89566e-70	0.586	0.269
Wa8730a005g006310	1.01852	1.21186e-69	1.68957e-65	0.708	0.453
Wa8730a006g003980	1.01594	6.55495e-76	9.13892e-72	0.378	0.102	AT3G59310		Eukaryotic protein of unknown function (DUF914)
Wa8730a015g000890	1.01305	1.08096e-84	1.50707e-80	0.815	0.441	AT4G30290 AT5G48070 AT2G18800 AT4G25810 AT5G57550	ATXTH19, XTH19 ATXTH20, XTH20 ATXTH21, XTH21 XTH23, XTR6 XTH25, XTR3	Encodes a xyloglucan endotransglucosylase/hydrolase with only only the endotransglucosylase (XET EC 2.4.1.207) activity towards xyloglucan and non-detectable endohydrolytic (XEH EC 3.2.1.151) activity. Expressed throughout both the main and the lateral root, with intensive expression at the dividing and elongating regions. Is expressed in lateral root primordia but expression ceases after lateral…
Wa8730a018g002320	1.00973	4.7723e-66	6.65355e-62	0.667	0.379	AT3G53990 AT3G03270 AT3G17020		Encodes universal stress protein (USP). Functions as a molecular chaperone under heat shock and oxidative stress conditions. Chaperone activity and assembly into complexes is redox regulated. HRU1 is a hypoxia induced universal stress protein. It exists as two splice variants with AT3G03270.2 , which contains a putative dimerization domain, the predominant transcript found under anoxia. It is ind…
Wa8730a002g004600	1.00964	8.68975e-77	1.21152e-72	0.459	0.157	AT5G66160 AT4G35770 AT4G00620 AT2G38660 AT2G21045	ATRMR1, RMR1 ATSEN1, DIN1, SEN1 EMB3127	Encodes a receptor homology region transmembrane domain, ring H2 motif protein involved in transport of storage proteins to protein storage vacuoles. Co-localizes with DIP positive vesicles. Senescence-associated gene that is strongly induced by phosphate starvation. Transcripts are differentially regulated at the level of mRNA stability at different times of day. mRNAs are targets of the mRNA de…
Wa8730a013g005630	1.00251	3.58697e-62	5.00096e-58	0.635	0.351	AT2G33470	ATGLTP1, GLTP1	glycolipid transfer protein 1

## Sheet: SC D DEGs
Dataset S1. Differentially Expressed Genes for Dusk Supercluster D
Genes showing significant differential expression (log2 FC>1 & p_val_adj <0.05 & PCT1 > 10%) in the given supercluster versus all other cells in the dataset
PCT1: Percentage of cells within the Supercluster expressing the gene
PCT2: Percentage of cells outside the Supercluster expressing the gene
DEGs also of Dawn Supercluster D
Gene	Ave. Log2 FC	p Value	p Value Adj.	PCT1	PCT2	Arabidopsis orthologues	Arabidopsis gene names	Arabidopsis gene description
Wa8730a001g000910	2.62176	1.64178e-91	2.28898e-87	0.583	0.231
Wa8730a001g011840	1.03608	2.22622e-38	3.10379e-34	0.215	0.056	AT3G11410 AT1G07430 AT5G59220 AT2G29380	AHG3, ATPP2CA, PP2CA AIP1, AtAIP1, HAI2, HON HAI1, SAG113 HAI3	Encodes protein phosphatase 2C. Negative regulator of ABA signalling. Expressed in seeds during germination. mRNA up-regulated by drought and ABA. Encodes a member of the group A protein phosphatase 2C (PP2C) family that is responsible for negatively regulating seed dormancy. Encodes a member of the PP2C family (Clade A protein phosphatases type 2C). Functions as a negative regulator of osmotic s…
Wa8730a007g006910	1.251	2.6959e-55	3.75863e-51	0.693	0.482	AT1G01720 AT5G63790 AT5G08790 AT1G77450	ANAC002, ATAF1 ANAC102, NAC102 ATAF2, anac081 NAC032, anac032	Belongs to a large family of putative transcriptional activators with NAC domain. Transcript level increases in response to wounding and abscisic acid. ATAF1 attentuates ABA signaling and sythesis. Mutants are hyposensitive to ABA. Encodes a member of the NAC family of transcription factors. ANAC102 appears to have a role in mediating response to low oxygen stress (hypoxia) in germinating seedlin…
Wa8730a007g007160	2.51966	1.07234e-114	1.49506e-110	0.443	0.092	AT1G35660
Wa8730a009g006540	1.03723	2.23043e-24	3.10967e-20	0.425	0.262	AT1G69260 AT1G13740 AT3G29575	AFP1 AFP2 AFP3	ABI five binding protein Encodes a member of a small plant-specific gene family whose members interact with ABI5 and appear to be involved in mediating stress responses. AFP2 mutants affect a number of ABA mediated processes such as germination and response to osmotic and sugar stress. AFP2 nuclear localization is stress dependent. ABI five binding protein 3
Wa8730a010g000800	1.74303	1.37619e-85	1.91868e-81	0.401	0.096	AT4G26080 AT5G57050 AT1G72770 AT1G17550	ABI1, AtABI1 ABI2, AtABI2 AtHAB1, HAB1 AtHAB2, HAB2	Involved in abscisic acid (ABA) signal transduction. Negative regulator of ABA promotion of stomatal closure. Encodes a protein phosphatase 2C and is involved in ABA signal transduction. Binds fibrillin preprotein in vitro and in vivo. mutant has ABA hypersensitive inhibition of seed germination Protein Phosphatase 2C regulates the activation of the Snf1-related kinase OST1 by abscisic acid. Prot…
Wa8730a012g004810	2.5503	1.6374e-171	2.28286e-167	0.806	0.326	AT5G65110	ACX2, ATACX2	Encodes an acyl-CoA oxidase presumably involved in long chain fatty acid biosynthesis.
Wa8730a015g003240	1.70274	3.68315e-40	5.13505e-36	0.519	0.293	AT3G30842 AT1G15520	ABCG38, ATPDR10, PDR10 ABCG40, ATABCG40, ATPDR12, PDR12	pleiotropic drug resistance 10 ABC transporter family involved in ABA transport and resistance to lead. Localizes to plasma membrane. Upregulated by lead. Expressed in leaves, flowers, stomata and roots.
Wa8730a015g003250	1.69638	1.57343e-14	2.19367e-10	0.255	0.143	AT3G30842 AT1G15520	ABCG38, ATPDR10, PDR10 ABCG40, ATABCG40, ATPDR12, PDR12	pleiotropic drug resistance 10 ABC transporter family involved in ABA transport and resistance to lead. Localizes to plasma membrane. Upregulated by lead. Expressed in leaves, flowers, stomata and roots.
Wa8730a016g003310	2.4848	2.59752e-95	3.62146e-91	0.423	0.102	AT3G14310 AT4G33220 AT1G11580 AT4G02330 AT1G23200 AT5G20860 AT3G60730 AT1G02810 AT4G15980	ATPME3, OZS2, PME3 ATPME44, PME44 ATPMEPCRA, PMEPCRA ATPMEPCRB, AtPME41, PME41	encodes a pectin methylesterase, targeted by a cellulose binding protein (CBP) from the parasitic nematode Heterodera schachtii during parasitism. pectin methylesterase 44 methylesterase PCR A Encodes a pectin methylesterase that is sensitive to chilling stress and brassinosteroid regulation. Encodes a pectin methyl esterase involved in embryo development. Plant invertase/pectin methylesterase in…
Wa8730a019g001830	1.55503	6.88641e-141	9.60103e-137	0.919	0.691	AT1G01720 AT1G52890 AT4G27410	ANAC002, ATAF1 ANAC019, NAC019 ANAC072, RD26	Belongs to a large family of putative transcriptional activators with NAC domain. Transcript level increases in response to wounding and abscisic acid. ATAF1 attentuates ABA signaling and sythesis. Mutants are hyposensitive to ABA. encodes a NAC transcription factor whose expression is induced by drought, high salt, and abscisic acid. This gene binds to ERD1 promoter in vitro. Encodes a NAC trans…
Wa8730a020g000110	2.07976	5.85419e-105	8.16191e-101	0.431	0.094	AT1G71960 AT2G36380 AT1G66950	ABCG25, ATABCG25 ABCG34, ATPDR6, PDR6 ABCG39, ATPDR11, PDR11	Encodes a plasma membrane localized ABC transporter involved in abscisic acid transport and responses. pleiotropic drug resistance 6 Encodes a plasma membrane-localized ABC transporter. Confers tolerance to herbicide paraquat.
Wa8730a001g005110	1.55584	7.76019e-79	1.08193e-74	0.588	0.26	AT2G33480 AT3G15170 AT3G29035 AT5G18270 AT5G39610 AT3G04060 AT3G12977	ANAC041, NAC041 ANAC054, ATNAC1, CUC1 ANAC059, ATNAC3, NAC3, ORS1 ANAC087 ANAC092, ATNAC2, ATNAC6, NAC2, NAC6, ORE1 NAC046, anac046	NAC domain containing protein 41 Encodes a transcription factor involved in shoot apical meristem formation and auxin-mediated lateral root formation. The gene is thought not to be involved in stress responses (NaCl, auxins, ethylene). <i>Cuc</i> mutant was first recognized at the heart stage, where embryos lacking two distinct bulges of cotyledonary primordia were observed. Encodes a protein wit…
Wa8730a001g006690	1.83348	1.65953e-115	2.31372e-111	0.708	0.293	AT2G40180 AT2G30020 AT1G07160	ATHPP2C5, PP2C5	Encodes PP2C5, a member of the PP2C family phosphatases. PP2C5 acts as a MAPK phosphatase that positively regulates seed germination, stomatal closure and ABA-inducible gene expression. Encodes AP2C1. Belongs to the clade B of the PP2C-superfamily. Acts as a MAPK phosphatase that negatively regulates MPK4 and MPK6. Protein phosphatase 2C family protein
Wa8730a002g001220	1.94557	4.40262e-95	6.13813e-91	0.43	0.102	AT5G52640 AT4G24190 AT5G56030	ATHS83, ATHSP90.1, AtHsp90-1, HSP81-1, HSP81.1, HSP83, HSP90.1 AtHsp90-7, AtHsp90.7, HSP90.7, SHD AtHsp90.2, ERD8, HSP81-2, HSP81.2, HSP90.2	Encodes a cytosolic heat shock protein AtHSP90.1. AtHSP90.1 interacts with disease resistance signaling components SGT1b and RAR1 and is required for RPS2-mediated resistance. encodes an ortholog of GRP94, an ER-resident HSP90-like protein and is involved in regulation of meristem size and organization. Single and double mutant analyses suggest that SHD may be required for the correct folding and…
Wa8730a003g004130	1.0676	1.42657e-37	1.98892e-33	0.241	0.071	AT5G11420 AT2G41810 AT3G08030		Protein of unknown function, DUF642 Protein of unknown function, DUF642 The mRNA of this gene is expressed in viable seeds. Its detection in a dry seed lot has potential for use as a molecular marker for germination performance as absence of expression correlates with decreased germination.
Wa8730a004g000410	1.72689	5.80003e-101	8.0864e-97	0.667	0.274	AT1G53170 AT3G23240 AT1G04370 AT2G31230	ATERF-8, ATERF8, ERF8 ATERF1, ERF1 ATERF14, ERF14 ATERF15, ERF15	encodes a member of the ERF (ethylene response factor) subfamily B-1 of ERF/AP2 transcription factor family (ATERF-8). The protein contains one AP2 domain. There are 15 members in this subfamily including ATERF-3, ATERF-4, ATERF-7, and leafy petiole. encodes a member of the ERF (ethylene response factor) subfamily B-3 of ERF/AP2 transcription factor family (ERF1). The protein contains one AP2 dom…
Wa8730a005g005240	1.33485	9.91583e-33	1.38246e-28	0.643	0.489	AT5G42050		DCD (Development and Cell Death) domain protein
Wa8730a007g000980	1.94003	2.78705e-68	3.88571e-64	0.494	0.197	AT3G01770 AT5G14270 AT3G27260 AT5G63320	ATBET10, BET10 ATBET9, BET9 GTE8 NPX1	bromodomain and extraterminal domain protein 10 bromodomain and extraterminal domain protein 9 Kinase like protein with similarity to yeast BDF1 and human RING3 protein, which have two bromodomains GTE8 has a single bromodomain Encodes NPX1 (Nuclear Protein X1), a nuclear factor regulating abscisic acid responses.
Wa8730a008g005470	2.22892	3.27901e-101	4.5716e-97	0.879	0.648	AT5G54500 AT4G36750 AT4G27270	FQR1	Encodes a flavin mononucleotide-binding flavodoxin-like quinone reductase that is a primary auxin-response gene. Quinone reductase family protein Quinone reductase family protein
Wa8730a010g000100	1.24078	4.9753e-62	6.93656e-58	0.242	0.043	AT3G16340 AT3G53480	ABCG29, ATPDR1, AtABCG29, PDR1 ABCG37, ATPDR9, PDR9, PIS1	Encodes a p-coumaryl alcohol exporter involved in lignin biosynthesis. Negative regulator of auxin polar transport inhibitors. ABCG37 regulates auxin distribution and homeostasis in roots by excluding IBA from the root apex, but does not act directly in basipetal transport. ABCG37 and ABCG36 act redundantly at outermost root plasma membranes and, transport IBA out of the cells.
Wa8730a014g005470	1.87347	1.67454e-73	2.33464e-69	0.643	0.348	AT5G66050		Wound-responsive family protein
Wa8730a018g000270	1.97123	1.2861e-113	1.79308e-109	0.612	0.207	AT3G11410 AT1G07430 AT5G59220 AT2G29380	AHG3, ATPP2CA, PP2CA AIP1, AtAIP1, HAI2, HON HAI1, SAG113 HAI3	Encodes protein phosphatase 2C. Negative regulator of ABA signalling. Expressed in seeds during germination. mRNA up-regulated by drought and ABA. Encodes a member of the group A protein phosphatase 2C (PP2C) family that is responsible for negatively regulating seed dormancy. Encodes a member of the PP2C family (Clade A protein phosphatases type 2C). Functions as a negative regulator of osmotic s…
Wa8730a018g001130	1.08075	4.37899e-22	6.10519e-18	0.294	0.147	AT2G38280	ATAMPD, FAC1	Encodes a protein with in vitro AMP deaminase activity that is involved in embryogenesis. Homozygous mutant embryos fail to develop past the zygote stage.
Wa8730a020g001370	1.32619	2.44648e-19	3.41088e-15	0.418	0.294	AT2G33480 AT5G13180	ANAC041, NAC041 ANAC083, NAC083, VNI2	NAC domain containing protein 41 Encodes a NAC domain transcription factor that interacts with VND7 and negatively regulates xylem vessel formation.
Wa8730a001g003830	1.4069	4.94956e-56	6.90067e-52	0.378	0.126	AT3G16720 AT2G47560 AT4G15975	ATL2, TL2	RING-H2 protein induced after exposure to chitin or inactivated crude cellulase preparations. RING/U-box superfamily protein RING/U-box superfamily protein
Wa8730a001g007370	1.60619	1.11209e-83	1.55048e-79	0.685	0.361	AT4G31550 AT2G24570	ATWRKY11, WRKY11 ATWRKY17, WRKY17	member of WRKY Transcription Factor Group II-d negative regulator of basal resistance to Pseudomonas syringae. member of WRKY Transcription Factor Group II-d negative regulator of basal resistance to Pseudomonas syringae.
Wa8730a003g004430	1.31325	5.89722e-78	8.22191e-74	0.215	0.02	AT1G55020 AT3G22400	ATLOX1, LOX1 ATLOX5, LOX5	lipoxygenase, a defense gene conferring resistance Xanthomonas campestris Encodes lipoxygenase5 (LOX5). LOX5 activity in roots facilitates green peach aphid colonization of Arabidopsis foliage by promoting green peach aphid feeding from sieve element and water consumption from xylem.
Wa8730a003g005730	2.31378	3.52057e-46	4.90837e-42	0.268	0.075	AT3G46860 AT5G43570		Predicted to encode a PR (pathogenesis-related) peptide that belongs to the PR-6 proteinase inhibitor family. Six putative PR-6-type protein encoding genes are found in Arabidopsis: At2g38900, At2g38870, At5g43570, At5g43580, At3g50020 and At3g46860. Predicted to encode a PR (pathogenesis-related) peptide that belongs to the PR-6 proteinase inhibitor family. Six putative PR-6-type protein encodin…
Wa8730a003g005740	2.16294	2.39514e-38	3.3393e-34	0.252	0.079	AT3G46860 AT5G43570		Predicted to encode a PR (pathogenesis-related) peptide that belongs to the PR-6 proteinase inhibitor family. Six putative PR-6-type protein encoding genes are found in Arabidopsis: At2g38900, At2g38870, At5g43570, At5g43580, At3g50020 and At3g46860. Predicted to encode a PR (pathogenesis-related) peptide that belongs to the PR-6 proteinase inhibitor family. Six putative PR-6-type protein encodin…
Wa8730a003g006350	1.61316	5.98802e-66	8.3485e-62	0.326	0.082	AT5G09410 AT2G22300 AT1G77680	CAMTA1, EICBP.B CAMTA3, SR1	calmodulin-binding protein, similar to another ethylene-upregulated calmodulin-binding protein ER1 GI:11612392 from (Nicotiana tabacum) Encodes a putative CAM binding transcription factor. Loss of function mutations show enhanced resistance to fungal and bacterial pathogens suggesting that CAMTA functions to suppress defense responses. Ribonuclease II/R family protein
Wa8730a004g002910	3.02055	2.34344e-115	3.26723e-111	0.465	0.105	AT5G42180 AT4G25980 AT4G30170 AT4G17690 AT4G36430 AT5G19880 AT4G11290	PER64	Peroxidase superfamily protein Peroxidase superfamily protein Peroxidase family protein Peroxidase superfamily protein Peroxidase superfamily protein Peroxidase superfamily protein Peroxidase superfamily protein
Wa8730a007g000380	1.08387	4.72942e-39	6.59376e-35	0.616	0.397	AT3G44260 AT5G22250	AtCAF1a, CAF1a AtCAF1b, CAF1b	Encodes one of the homologs of the yeast CCR4-associated factor 1: AT3G44260 (CAF1a), AT5G22250 (CAF1b). Has mRNA deadenylation activity. Also plays a role in plant defense responses. Encodes one of the homologs of the yeast CCR4-associated factor 1: AT3G44260 (CAF1a), AT5G22250 (CAF1b). Has mRNA deadenylation activity. Also plays a role in plant defense responses.
Wa8730a009g002950	1.93237	3.76145e-36	5.24422e-32	0.388	0.19	AT2G38870		Predicted to encode a PR (pathogenesis-related) peptide that belongs to the PR-6 proteinase inhibitor family. Six putative PR-6-type protein encoding genes are found in Arabidopsis: At2g38900, At2g38870, At5g43570, At5g43580, At3g50020 and At3g46860.
Wa8730a010g006490	2.00948	5.58896e-122	7.79212e-118	0.874	0.66	AT4G28050 AT2G23810 AT4G30430	TET7 TET8 TET9	Member of TETRASPANIN family Member of TETRASPANIN family Member of TETRASPANIN family
Wa8730a011g005230	1.4664	9.30959e-50	1.29794e-45	0.541	0.293	AT4G31800 AT1G80840 AT2G25000	ATWRKY18, WRKY18 ATWRKY40, WRKY40 ATWRKY60, WRKY60	Pathogen-induced transcription factor. Binds W-box sequences in vitro. Forms protein complexes with itself and with WRKY40 and WRKY60. Constitutive expression of WRKY18 enhanced resistance to P. syringae, but its coexpression with WRKY40 or WRKY60 made plants more susceptible to both P. syringae and B. cinerea. WRKY18, WRKY40, and WRKY60 have partially redundant roles in response to the hemibiotr…
Wa8730a011g005620	1.27128	5.55913e-31	7.75054e-27	0.338	0.16	AT2G24720 AT4G31710 AT5G11180	ATGLR2.2, GLR2.2 ATGLR2.4, AUG8, GLR2.4 ATGLR2.6, GLR2.6	member of Putative ligand-gated ion channel subunit family member of Putative ligand-gated ion channel subunit family member of Putative ligand-gated ion channel subunit family
Wa8730a013g001140	2.39716	7.77645e-101	1.08419e-96	0.756	0.49	AT5G47120 AT4G17580	ATBI-1, ATBI1, BI-1, BI1	Encodes BI-1, a homolog of mammalian Bax inhibitor 1. Functions as an attenuator of biotic and abiotic types of cell death. Bax-induced cell death can be downregulated by ectopically expressing AtBI in planta. Bax inhibitor-1 family protein
Wa8730a014g001820	2.44444	1.62134e-124	2.26048e-120	0.619	0.205	AT1G74800 AT1G27120		Encodes a Golgi-localized hydroxyproline galactosyltransferase GALT5. Functions together with GALT2 as redundant GALTs that control AGP (arabinogalactan-proteins) O-glycosylation, which is essential for normal growth and development. Mutants display multiple phenotypes including reduced root hair growth. Encodes a Golgi-localized hydroxyproline-O-galactosyltransferase.
Wa8730a015g000740	1.00483	6.31642e-26	8.80635e-22	0.3	0.139	AT4G31550 AT2G24570	ATWRKY11, WRKY11 ATWRKY17, WRKY17	member of WRKY Transcription Factor Group II-d negative regulator of basal resistance to Pseudomonas syringae. member of WRKY Transcription Factor Group II-d negative regulator of basal resistance to Pseudomonas syringae.
Wa8730a015g001560	2.44498	6.07235e-88	8.46608e-84	0.607	0.272	AT5G48540		receptor-like protein kinase-related family protein
Wa8730a017g002860	1.04662	2.62583e-25	3.66093e-21	0.564	0.425	AT4G02600 AT5G65970 AT2G39200 AT1G11310 AT2G17480	ATMLO1, MLO1 ATMLO10, MLO10 ATMLO12, MLO12 ATMLO2, MLO2, PMR2 ATMLO8, MLO8	A member of a large family of seven-transmembrane domain proteins specific to plants, homologs of the barley mildew resistance locus o (MLO) protein. The Arabidopsis genome contains 15 genes encoding MLO proteins, with localization in plasma membrane. Phylogenetic analysis revealed four clades of closely-related AtMLO genes. ATMLO1 belongs to the clade II, with ATMLO13 and ATMLO15. The gene is ex…
Wa8730a019g000760	1.87399	1.51054e-117	2.10599e-113	0.509	0.121	AT5G03540 AT3G55150 AT2G39380 AT3G09520 AT1G07725 AT5G59730 AT2G28650	ATEXO70A1, EXO70A1 ATEXO70H1, EXO70H1 ATEXO70H2, EXO70H2 ATEXO70H4, EXO70H4 ATEXO70H6, EXO70H6 ATEXO70H7, EXO70H7 ATEXO70H8, EXO70H8	AtEXO70A1 is a member of EXO70 gene family, putative exocyst subunits, conserved in land plants. Arabidopsis thaliana contains 23 putative EXO70 genes, which can be classified into nine clusters on the phylogenetic tree A member of EXO70 gene family, putative exocyst subunits, conserved in land plants. Arabidopsis thaliana contains 23 putative EXO70 genes, which can be classified into eight clust…
Wa8730a001g000900	1.01862	9.53147e-43	1.32888e-38	0.168	0.028
Wa8730a001g002190	1.03599	4.02676e-17	5.61411e-13	0.317	0.184	AT5G19120 AT1G03220		Eukaryotic aspartyl protease family protein Eukaryotic aspartyl protease family protein
Wa8730a001g002610	1.24027	1.53963e-37	2.14656e-33	0.57	0.366	AT4G15530	PPDK	Encodes a dual-targeted protein believed to act as a pyruvate, orthophosphate dikinase. These enzymes are normally associated with C4 photosynthesis which does not occur in Arabidopsis. However, PPDK may play a role in remobilizing nitrogen during leaf senescence in Arabidopsis. The product of the long transcript (.1 gene model) was shown to be targeted to the chloroplast, whereas the shorter tra…
Wa8730a001g003140	1.52312	4.92795e-69	6.87055e-65	0.64	0.34	AT5G18670	BAM9, BMY3	putative beta-amylase BMY3 (BMY3)
Wa8730a001g005100	1.53413	5.37341e-38	7.4916e-34	0.418	0.217	AT5G04930	ALA1	Encodes a putative aminophospholipid translocase (p-type ATPase) involved in chilling response.
Wa8730a001g006070	1.71932	8.93745e-89	1.24606e-84	0.619	0.274	AT3G10940	LSF2	Encodes a protein with a predicted dual-specificity phosphatase domain, similar to the glucan phosphorylases SEX4 and LSF1, however, it lacks the carbohydrate binding domain present in those proteins. Has phosphoglucan phosphatase activity. It binds to starch and specifically hydrolyzes phosphate from the C3-position.
Wa8730a001g010360	1.39942	8.07245e-55	1.12546e-50	0.367	0.12
Wa8730a001g011310	1.64731	1.4396e-76	2.00708e-72	0.46	0.144	AT5G02500 AT3G12580 AT3G09440	AT-HSC70-1, AtHsp70-1, HSC70, HSC70-1, HSP70-1 ATHSP70, HSP70	encodes a member of heat shock protein 70 family. heat shock protein 70 Heat shock protein 70 (Hsp 70) family protein
Wa8730a001g011500	1.64811	8.90982e-94	1.24221e-89	0.339	0.058	AT2G29735 AT3G55430 AT4G34480 AT2G39640 AT3G46570	NA	NA O-Glycosyl hydrolases family 17 protein O-Glycosyl hydrolases family 17 protein glycosyl hydrolase family 17 protein Glycosyl hydrolase superfamily protein
Wa8730a001g012190	1.24803	1.18925e-32	1.65805e-28	0.252	0.09	AT5G01100 AT3G54100 AT2G37980	FRB1	O-fucosyltransferase family protein O-fucosyltransferase family protein O-fucosyltransferase family protein
Wa8730a002g001010	2.0477	1.67793e-99	2.33937e-95	0.499	0.147	AT1G01570		Protein of unknown function (DUF604)
Wa8730a002g003450	1.95933	4.27788e-82	5.96421e-78	0.601	0.281	AT2G35710 AT4G16600	PGSIP7 PGSIP8	Nucleotide-diphospho-sugar transferases superfamily protein Nucleotide-diphospho-sugar transferases superfamily protein
Wa8730a002g003960	1.11503	2.74656e-36	3.82926e-32	0.173	0.038	AT5G37690 AT5G41890 AT1G75890		SGNH hydrolase-type esterase superfamily protein GDSL-motif esterase/acyltransferase/lipase. Enzyme group with broad substrate specificity that may catalyze acyltransfer or hydrolase reactions with lipid and non-lipid substrates. GDSL-motif esterase/acyltransferase/lipase. Enzyme group with broad substrate specificity that may catalyze acyltransfer or hydrolase reactions with lipid and non-lipid …
Wa8730a002g004460	2.00753	1.3104e-133	1.82696e-129	0.803	0.387	AT4G38580 AT1G71050 AT4G35060 AT5G66110	ATFP6, FP6, HIPP26 HIPP20 HIPP25 HIPP27	putative farnesylated protein (At4g38580) mRNA, complete Heavy metal transport/detoxification superfamily protein Heavy metal transport/detoxification superfamily protein Heavy metal transport/detoxification superfamily protein
Wa8730a002g005830	1.14945	4.99774e-24	6.96784e-20	0.414	0.251	AT1G76520 AT5G65980 AT2G17500 AT1G20925		Auxin efflux carrier family protein Auxin efflux carrier family protein Auxin efflux carrier family protein Auxin efflux carrier family protein
Wa8730a003g000840	1.42086	7.94278e-46	1.10738e-41	0.346	0.127	AT5G66650 AT4G36820 AT2G23790 AT5G42610		Protein of unknown function (DUF607) Protein of unknown function (DUF607) Protein of unknown function (DUF607) Protein of unknown function (DUF607)
Wa8730a003g001330	1.55996	5.68966e-44	7.93253e-40	0.457	0.213	AT4G37850 AT2G22750		basic helix-loop-helix (bHLH) DNA-binding superfamily protein basic helix-loop-helix (bHLH) DNA-binding superfamily protein
Wa8730a003g001710	1.22439	1.56855e-57	2.18687e-53	0.412	0.143	AT3G18830 AT4G36670 AT2G16120 AT2G20780 AT2G18480 AT1G19450	ATPLT5, ATPMT5, PMT5 AtPLT6, AtPMT6, PLT6, PMT6 ATPMT1, PMT1	This gene encodes a plasma membrane-localized polyol/cyclitol/monosaccharide-H+-symporter. The symporter is able to catalyze the energy-dependent membrane passage of a wide range of linear polyols (three to six carbon backbone), of cyclic polyols (<i>myo</i>-inositol), and of numerous monosaccharides, including pyranose ring-forming and furanose ring-forming hexoses and pentoses. This gene belong…
Wa8730a003g004240	1.45975	3.84503e-56	5.36074e-52	0.402	0.144	AT2G41870 AT3G57540		Remorin family protein Remorin family protein
Wa8730a003g005710	1.10318	1.18068e-21	1.6461e-17	0.279	0.135	AT4G08580		microfibrillar-associated protein-related
Wa8730a003g006290	1.44827	4.5974e-47	6.40969e-43	0.389	0.156	AT1G78230 AT3G17920		Outer arm dynein light chain 1 protein Outer arm dynein light chain 1 protein
Wa8730a004g003130	1.4971	1.54401e-36	2.15265e-32	0.52	0.31	AT3G24540	AtPERK3, PERK3	Encodes a member of the proline-rich extensin-like receptor kinase (PERK) family. This family consists of 15 predicted receptor kinases (PMID: 15653807).
Wa8730a004g006020	1.0838	9.38437e-30	1.30837e-25	0.305	0.133	AT1G29395	COR413-TM1, COR413IM1, COR414-TM1	Integral membrane protein in the inner envelope of chloroplasts. Provide freezing tolerance. Expression is induced by short-term cold-treatment, water deprivation, and abscisic acid treatment.
Wa8730a004g007490	1.94061	2.77559e-112	3.86973e-108	0.84	0.534	AT3G24530		AAA-type ATPase family protein / ankyrin repeat family protein
Wa8730a004g008440	1.32664	2.87287e-60	4.00536e-56	0.397	0.132
Wa8730a004g008480	1.56896	2.89006e-72	4.02932e-68	0.57	0.249	AT3G24500	ATMBF1C, MBF1C	One of three genes in A. thaliana encoding multiprotein bridging factor 1, a highly conserved transcriptional coactivator. May serve as a bridging factor between a bZIP factor and TBP. Its expression is specifically elevated in response to pathogen infection, salinity, drought, heat, hydrogen peroxide, and application of abscisic acid or salicylic acid. Constitutive expression enhances the tolera…
Wa8730a004g008620	1.1032	4.69287e-22	6.5428e-18	0.228	0.097	AT1G15460 AT4G32510 AT5G25430	ATBOR4, BOR4	Encodes a efflux-type boron transporter. Over-expression improved plant growth under B toxic conditions. HCO3- transporter family HCO3- transporter family
Wa8730a005g001590	1.14938	6.27626e-49	8.75037e-45	0.31	0.091	AT5G12020 AT5G51440	HSP17.6II	17.6 kDa class II heat shock protein HSP20-like chaperones superfamily protein
Wa8730a005g002190	1.20215	8.55322e-34	1.19249e-29	0.294	0.115	AT4G33050 AT3G13600 AT3G52870 AT5G57010 AT2G26190	AtIQM1, EDA39, IQM1	Encodes a calmodulin-binding protein involved in stomatal movement. calmodulin-binding family protein IQ calmodulin-binding motif family protein calmodulin-binding family protein calmodulin-binding family protein
Wa8730a005g003350	1.58487	2.53081e-67	3.52845e-63	0.696	0.466	AT1G52245 AT3G16120	NA	NA Dynein light chain type 1 family protein
Wa8730a005g003750	1.5794	4.51734e-33	6.29807e-29	0.383	0.197	AT3G25780	AOC3	Encodes allene oxide cyclase, one of the enzymes involved in jasmonic acid biosynthesis. One of four genes in Arabidopsis that encode this enzyme. mRNA expression is upregulated in senescing leaves. Note: Nomenclature for Arabidopsis allene oxide cyclase 3 (AOC3, AT3G25780) gene is based on Stenzel et al. 2003 Plant Molecular Biology 51:895-911. AOC3 (AT3G25780) is also referred to as AOC2 in He …
Wa8730a005g004220	1.15263	1.75013e-51	2.44003e-47	0.236	0.049	AT4G01070 AT1G01420 AT5G26310	GT72B1, UGT72B1 UGT72B3 UGT72E3	the glycosyltransferase (UGT72B1) is involved in metabolizing xenobiotica (chloroaniline and chlorophenole). Comparison between wild type and knock-out mutant demonstrates the central role of this gene for metabolizing chloroaniline but significantly less for chlorophenole. The glucosyltransferase preferred UDP-xylose over UDP-glucose indicating its (additional) functioning as a xylosyltransferas…
Wa8730a005g005110	1.59941	1.40317e-72	1.9563e-68	0.341	0.079	AT5G42830		HXXXD-type acyl-transferase family protein
Wa8730a005g006290	1.68431	1.71653e-59	2.39318e-55	0.231	0.04	AT2G21490	LEA	dehydrin LEA
Wa8730a005g006550	1.24191	1.29647e-56	1.80754e-52	0.591	0.316	AT3G27880 AT5G14730		Protein of unknown function (DUF1645)
Wa8730a005g006600	2.03775	1.8057e-47	2.51751e-43	0.595	0.396	AT3G03270 AT5G14680 AT3G58450		HRU1 is a hypoxia induced universal stress protein. It exists as two splice variants with AT3G03270.2 , which contains a putative dimerization domain, the predominant transcript found under anoxia. It is induced by RAP2.12. Subcellular localization is dynamic under anoxia the localization of HRU1 shifts from cytoplasm to the plasma membrane. Adenine nucleotide alpha hydrolases-like superfamily pr…
Wa8730a005g008260	1.77047	3.52836e-45	4.91924e-41	0.52	0.304	AT1G70770 AT1G23170		Protein of unknown function DUF2359, transmembrane Protein of unknown function DUF2359, transmembrane
Wa8730a005g008320	1.29022	9.82875e-59	1.37032e-54	0.252	0.05	AT1G26150 AT1G70740 AT1G49100 AT1G29740	AtPERK10, PERK10	Encodes a member of the proline-rich extensin-like receptor kinase (PERK) family. This family consists of 15 predicted receptor kinases (PMID: 15653807). Protein kinase superfamily protein Leucine-rich repeat protein kinase family protein Leucine-rich repeat transmembrane protein kinase
Wa8730a005g008430	1.27591	4.64218e-79	6.47213e-75	0.801	0.547	AT1G67090 AT5G38430	RBCS1A RBCS1B	Encodes a member of the Rubisco small subunit (RBCS) multigene family: RBCS1A (At1g67090), RBCS1B (At5g38430), RBCS2B (At5g38420), and RBCS3B (At5g38410). Functions to yield sufficient Rubisco content for leaf photosynthetic capacity. Encodes a member of the Rubisco small subunit (RBCS) multigene family: RBCS1A (At1g67090), RBCS1B (At5g38430), RBCS2B (At5g38420), and RBCS3B (At5g38410).
Wa8730a006g000870	1.17773	5.91256e-34	8.24328e-30	0.212	0.062	AT1G79350	EMB1135	Encodes the Arabidopsis thaliana orthologue of metazoan Strawberry notch, a highly conserved co-activator of the developmental regulator Notch. It mediates stress-induced chromatin memory by modulating nucleosome occupancy by interacting with chromatin remodeling proteins of the ISWI and SWI/SNF classes.
Wa8730a006g000980	1.65334	8.21913e-71	1.14591e-66	0.514	0.199	AT3G22120 AT4G15160 AT1G62500	CWLP	cell wall-plasma membrane linker protein homolog (CWLP) Bifunctional inhibitor/lipid-transfer protein/seed storage 2S albumin superfamily protein Bifunctional inhibitor/lipid-transfer protein/seed storage 2S albumin superfamily protein
Wa8730a006g001110	1.03515	1.00374e-44	1.39941e-40	0.236	0.057	AT4G15160 AT1G62500 AT3G22142		Bifunctional inhibitor/lipid-transfer protein/seed storage 2S albumin superfamily protein Bifunctional inhibitor/lipid-transfer protein/seed storage 2S albumin superfamily protein Encodes a Protease inhibitor/seed storage/LTP family protein
Wa8730a006g001210	1.53223	7.00673e-53	9.76878e-49	0.325	0.097	AT2G32210 AT3G22240
Wa8730a006g001280	1.45777	3.33397e-34	4.64822e-30	0.339	0.148	AT2G32210 AT3G22240
Wa8730a006g001290	1.79031	7.99608e-36	1.11481e-31	0.365	0.168	AT2G32210 AT3G22240
Wa8730a006g002900	1.20267	2.24168e-14	3.12535e-10	0.241	0.131	AT3G25230 AT5G48570	ATFKBP62, FKBP62, ROF1 ATFKBP65, FKBP65, ROF2	Encodes a a high molecular weight member of the FK506 binding protein (FKBP) family. It has three FKBP12-like domains, tetratricopeptide repeats, and a putative calmodulin binding domain. Modulates thermotolerance by interacting with HSP90.1 and affecting the accumulation of HsfA2-regulated sHSPs. Encodes one of the 36 carboxylate clamp (CC)-tetratricopeptide repeat (TPR) proteins (Prasad 2010, P…
Wa8730a007g002940	1.52116	2.35615e-43	3.28495e-39	0.273	0.08	AT4G24960 AT5G50720 AT2G42820	ATHVA22D, HVA22D ATHVA22E, HVA22E HVA22F	Homologous to a eukaryote specific ABA- and stress-inducible gene first isolated from barley. Groups in one subfamily with ATHVA22E. Along with other members of the ATHVA22 family, it may be involved in regulation of autophagy during development. Encodes one of five HVA22 homologs in Arabidopsis. HVA22 is an ABA- and stress-inducible gene first isolated from barley. Members of this gene family ha…
Wa8730a007g004510	1.55954	3.88666e-46	5.41877e-42	0.609	0.394	AT1G28200 AT5G13200	FIP1	VirF-interacting protein FIP1 Encodes a protein with unknown function that is involved in hormone mediated regulation of seed germination/dormancy.
Wa8730a007g006300	1.88534	7.14544e-103	9.96217e-99	0.342	0.051	AT2G18193 AT3G50940 AT3G28580		P-loop containing nucleoside triphosphate hydrolases superfamily protein P-loop containing nucleoside triphosphate hydrolases superfamily protein P-loop containing nucleoside triphosphate hydrolases superfamily protein
Wa8730a007g006500	1.44174	4.76607e-60	6.64485e-56	0.483	0.204
Wa8730a007g008470	1.4178	1.00277e-33	1.39807e-29	0.415	0.216	AT5G42100 AT2G27500 AT4G34480 AT4G18340 AT2G16230	ATBG_PPAP, BG_PPAP	encodes a plasmodesmal (Pd)-associated membrane protein involved in plasmodesmal callose degradation, i.e. beta-1,3-glucanase (EC 3.2.1.39), and functions in the gating of Pd Glycosyl hydrolase superfamily protein O-Glycosyl hydrolases family 17 protein Glycosyl hydrolase superfamily protein O-Glycosyl hydrolases family 17 protein
Wa8730a008g002350	1.62574	8.84317e-48	1.23291e-43	0.389	0.157	AT5G11540	AtGulLO3, GulLO3	Encodes a homolog of rat L-gulono-1,4-lactone (L-GulL) oxidase that is involved in the biosynthesis of L-ascorbic acid.
Wa8730a008g003440	1.03678	3.46486e-11	4.8307e-07	0.373	0.282	AT1G30640 AT3G23310 AT2G20470		Protein kinase family protein AGC (cAMP-dependent, cGMP-dependent and protein kinase C) kinase family protein AGC (cAMP-dependent, cGMP-dependent and protein kinase C) kinase family protein
Wa8730a008g003990	1.68431	4.35788e-27	6.07576e-23	0.52	0.375	AT2G32240
Wa8730a008g005080	1.7282	4.64612e-32	6.47762e-28	0.265	0.1	AT4G21215
Wa8730a009g000380	1.13092	4.15596e-16	5.79425e-12	0.244	0.129	AT3G53880 AT2G37770	AKR4C11 AKR4C9, ChlAKR	NAD(P)-linked oxidoreductase superfamily protein Encodes an NADPH-dependent aldo-keto reductase that can act on a wide variety of substrates in vitro including saturated and unsaturated aldehydes, steroids, and sugars. GFP-tagged AKR4C9 localizes to the chloroplast where it may play a role in detoxifying reactive carbonyl compounds that threaten to impair the photosynthetic process. Transcript le…
Wa8730a009g001650	1.40481	1.38947e-37	1.9372e-33	0.2	0.05	AT2G29890 AT2G41740 AT3G57410	ATVLN1, VLN1 ATVLN2, VLN2 ATVLN3, VLN3	Encodes a ubiquitously expressed villin-like protein, whose mRNA may be alternatively processed. Villin belongs to a superfamily of actin binding proteins called the villin/gelsolin family. Animal villins are involved in actin binding. VLN1 protein co-localizes with actin filaments in several assays. VLN1 binds and bundles F-actin in a calcium-independent manner. It does not nucleate, cap or seve…
Wa8730a009g006210	1.26153	2.25188e-39	3.13957e-35	0.342	0.141	AT1G27770 AT3G57330 AT4G37640 AT2G22950	ACA1, PEA1 ACA11 ACA2 ACA7	Encodes a chloroplast envelope Ca2+-ATPase with an N-terminal autoinhibitor. Lesion mimic phenotype when mutation in the gene is combined with a mutation in ACA4. Lesion mimic phenotype of double knockout can be suppressed by nutritional supplements that increase anion levels (e.g. 15 mM Nitrate, Chloride, or Phosphate) Encodes a calmodulin-regulated Ca(2+)-pump located in the endoplasmic reticul…
Wa8730a010g001420	2.268	3.65721e-86	5.09889e-82	0.402	0.097
Wa8730a010g003440	1.63439	2.02225e-77	2.81942e-73	0.614	0.284	AT3G49940 AT1G67100 AT3G02550 AT1G68510	LBD38 LBD40 LBD41 LBD42	LOB domain-containing protein 38 LOB domain-containing protein 40 LOB domain-containing protein 41 LOB domain-containing protein 42
Wa8730a010g003610	1.2089	1.4803e-50	2.06384e-46	0.25	0.058
Wa8730a010g004450	2.17243	1.41559e-58	1.97362e-54	0.393	0.137
Wa8730a010g004820	1.39269	8.14171e-58	1.13512e-53	0.212	0.034	AT5G15730 AT5G47850 AT4G31250	AtCRLK2, CRLK2 CCR4	Protein kinase superfamily protein CRINKLY4 related 4 Leucine-rich repeat protein kinase family protein
Wa8730a010g005120	1.65008	5.86499e-66	8.17697e-62	0.619	0.346	AT4G30600		signal recognition particle receptor alpha subunit family protein
Wa8730a010g005650	1.84327	8.53625e-92	1.19012e-87	0.73	0.424	AT3G19940		Encodes a hexose-H(+) symporter that catalyzes the high-affinity uptake of glucose, galactose and mannose that is induced under low-glucose conditions in pollen tubes.
Wa8730a010g006210	1.45647	1.96706e-48	2.74247e-44	0.363	0.132	AT2G24580		FAD-dependent oxidoreductase family protein
Wa8730a011g002000	1.11378	4.74125e-53	6.61026e-49	0.254	0.057
Wa8730a011g003230	1.16083	4.74798e-16	6.61963e-12	0.178	0.076	AT1G73680	ALPHA, alpha-DOX2	Encodes an alpha dioxygenase. Recombinant protein catalyzes the conversion of a wide range of fatty acids into 2(R)-hydroperoxy derivatives.
Wa8730a011g003790	1.20419	2.39971e-36	3.34567e-32	0.509	0.289	AT5G57620 AT5G67300 AT4G37260	AtMYB36, MYB36 ATMYB44, ATMYBR1, MYB44, MYBR1 ATMYB73, MYB73	Encodes a putative transcription factor (MYB36). Member of the R2R3 factor MYB gene family involved in mediating plant responses to a variety of abiotic stimiuli. Member of the R2R3 factor gene family.
Wa8730a011g004200	2.05443	2.27844e-68	3.1766e-64	0.375	0.105
Wa8730a011g005220	1.54047	5.38956e-69	7.51412e-65	0.69	0.412	AT2G25090 AT4G30960 AT5G58380 AT5G45820 AT5G25110 AT5G10930	AtCIPK16, CIPK16, SnRK3.18 ATCIPK6, CIPK6, SIP3, SNRK3.14 CIPK10, PKS2, SIP1, SNRK3.8 CIPK20, PKS18, SnRK3.6 CIPK25, SnRK3.25 CIPK5, SnRK3.24	Encodes a member of the SNF1-related kinase (SnRK) gene family (SnRK3.18), which has also been reported as a member of the CBL-interacting protein kinases (CIPK16). Encodes CBL-interacting protein kinase 6 (CIPK6). Required for development and salt tolerance. Encodes a CBL-interacting protein kinase with similarity to SOS protein kinase. Encodes a CBL-interacting serine/threonine protein kinase c…
Wa8730a011g005910	1.13845	1.34358e-41	1.87321e-37	0.559	0.33	AT5G57123 AT4G29905 AT5G10695
Wa8730a012g000410	1.16736	3.26599e-35	4.55345e-31	0.312	0.122	AT2G27350	OTLD1	Encodes an otubain-like histone deubiquitinase involved in chromatin modification and regulation of plant gene expression.
Wa8730a012g000770	1.35595	8.38933e-20	1.16964e-15	0.223	0.099	AT5G08720		Encodes PIN2 PROMOTER BINDING PROTEIN 1 (PPP1), an evolutionary conserved plant-specific DNA binding protein that acts on transcription of PIN genes. Also named as HCF145. Mutations in HCF145 have reduced level of the tricistronic psaA-psaB-rps (small-subunit ribosomal protein)14 mRNA which encodes for the major subunits of the photosystem I (PSI). HCF145 binds to the 5'UTR of PSAA via a novel TM…
Wa8730a012g001430	1.91239	2.17561e-77	3.03324e-73	0.229	0.026	AT5G63450 AT3G48520 AT1G34540 AT5G08250	CYP94B1 CYP94B3 CYP94D1	member of CYP94B member of CYP94B member of CYP94D Cytochrome P450 superfamily protein
Wa8730a012g004170	1.44359	1.74563e-44	2.43376e-40	0.381	0.162	AT1G78720 AT2G34250 AT1G29310		SecY protein transport family protein SecY protein transport family protein SecY protein transport family protein
Wa8730a012g005080	1.05434	5.77417e-25	8.05034e-21	0.428	0.268	AT5G09930 AT5G64840 AT4G33460 AT2G22120	ABCF2 ABCF5, ATGCN5, GCN5 ABCI10, ATNAP13, EMB2751	member of GCN subfamily member of GCN subfamily member of NAP subfamily RING/FYVE/PHD zinc finger superfamily protein
Wa8730a013g001840	1.94773	2.50587e-94	3.49368e-90	0.402	0.09	AT2G46620		P-loop containing nucleoside triphosphate hydrolases superfamily protein
Wa8730a013g004490	1.45327	7.61344e-69	1.06147e-64	0.837	0.738	AT2G31570 AT3G63080 AT1G63460	ATGPX2, GPX2 ATGPX5, GPX5, MEE42 ATGPX8, GPX8	glutathione peroxidase GPx Encodes glutathione peroxidase. Encodes GPX8 (glutathione peroxidase 8). Involved in the suppression of oxidative damages in nucleus and cytosol. The mRNA is cell-to-cell mobile.
Wa8730a013g005360	1.48342	4.64567e-84	6.477e-80	0.414	0.105	AT3G23920	AtBAM1, BAM1, BMY7, TR-BAMY	Encodes a chloroplast beta-amylase. Is necessary for leaf starch breakdown in the absence of BAM3.
Wa8730a014g000450	1.34545	2.1187e-46	2.95389e-42	0.43	0.192	AT1G49560 AT4G37180		Homeodomain-like superfamily protein myb family transcription factor, contains Pfam domain, PF00249: Myb-like DNA-binding domain l also isolated as a putative cytoskeletal protein in a yeast screen
Wa8730a014g001210	2.03103	1.13414e-98	1.58122e-94	0.485	0.136	AT2G03450 AT1G13900	ATPAP9, PAP9 PAP2	purple acid phosphatase 9 Encodes a dual-localized acid phosphatase (mitochondria and chloroplast) that modulates carbon metabolism.
Wa8730a014g001980	1.33058	5.22315e-24	7.28211e-20	0.313	0.161
Wa8730a014g003980	1.4151	2.53843e-37	3.53909e-33	0.312	0.122
Wa8730a014g004040	1.12524	6.82098e-27	9.50982e-23	0.305	0.141	AT5G15730 AT4G00300 AT2G28970 AT5G24010	AtCRLK2, CRLK2	Protein kinase superfamily protein AT4G00300 has been split into two loci based on new cDNA evidence provided by Aleksander Riise Hansen of University of Copenhagen: AT4G00300.2 becomes AT4G00300.1 a new locus AT4G00295 is created. See comments field for AT4G00295 annotation. Leucine-rich repeat protein kinase family protein Protein kinase superfamily protein
Wa8730a014g006110	1.19664	8.37847e-39	1.16813e-34	0.384	0.173	AT1G14370 AT4G35600 AT2G17220 AT3G55450 AT1G76360 AT1G18160 AT5G03320	APK2A, Kin1, PBL2 CST, CX32, Kin4 Kin3 PBL1	Encodes protein kinase APK2a. plant-type connexin (gap junction-type protein), a component of plasmodesmata Encodes a putative serine/threonine-specific protein kinase kin3. Protein is N-myristoylated. PBS1-like 1 Protein kinase superfamily protein Protein kinase superfamily protein Protein kinase superfamily protein
Wa8730a015g000790	1.06673	2.44259e-37	3.40546e-33	0.486	0.25	AT5G48070 AT2G18800 AT4G30270 AT4G25810 AT5G57550	ATXTH20, XTH20 ATXTH21, XTH21 MERI-5, MERI5B, SEN4, XTH24 XTH23, XTR6 XTH25, XTR3	putative xyloglucan endotransglycosylase/hydrolase, expressed primarily in the stele of mature non-elongating regions of both the main and the lateral root. Is expressed in lateral root primordia but expression ceases after lateral root begins to grow. xyloglucan endotransglucosylase/hydrolase 21 encodes a protein similar to endo xyloglucan transferase in sequence. It is also very similar to BRU1…
Wa8730a015g000860	1.43809	1.6071e-92	2.24061e-88	0.724	0.33	AT5G48070 AT2G18800 AT4G30270 AT4G25810 AT5G57550	ATXTH20, XTH20 ATXTH21, XTH21 MERI-5, MERI5B, SEN4, XTH24 XTH23, XTR6 XTH25, XTR3	putative xyloglucan endotransglycosylase/hydrolase, expressed primarily in the stele of mature non-elongating regions of both the main and the lateral root. Is expressed in lateral root primordia but expression ceases after lateral root begins to grow. xyloglucan endotransglucosylase/hydrolase 21 encodes a protein similar to endo xyloglucan transferase in sequence. It is also very similar to BRU1…
Wa8730a015g001570	1.43573	1.53278e-16	2.137e-12	0.457	0.337	AT5G48540		receptor-like protein kinase-related family protein
Wa8730a015g002550	1.32256	2.50375e-36	3.49073e-32	0.423	0.218	AT1G42990	ATBZIP60, BZIP60	AtbZIP60 consists of a bZIP DNA binding domain followed by a putative transmembrane domain. GFP fusions containing the first 260 amino acids (AtbZIP60deltaC) are nuclear-localized. AtbZIP60 is upregulated by the addition of tunicamycin (ER stress response inductor), DTT (inhibitor of disulfide bond formation) and azetin-2-carboxylate (proline analog perturbing protein structure). Upon ER stress t…
Wa8730a015g004620	1.04753	5.66397e-10	7.89671e-06	0.262	0.177
Wa8730a015g004680	2.17465	1.1713e-103	1.63302e-99	0.662	0.297	AT3G28340 AT1G13250 AT1G24170 AT1G70090	GATL10, GolS8 GATL3 GATL8, LGT9 GATL9, LGT8	Encodes a protein with putative galacturonosyltransferase activity. Encodes a protein with putative galacturonosyltransferase activity. Encodes a protein with putative galacturonosyltransferase activity. Encodes a protein with putative galacturonosyltransferase activity.
Wa8730a015g005970	2.02076	1.20591e-59	1.68128e-55	0.517	0.246
Wa8730a015g006070	1.77794	3.18233e-53	4.43681e-49	0.417	0.166
Wa8730a016g001540	1.37809	3.22216e-25	4.49234e-21	0.462	0.299	AT1G35140 AT5G64260 AT5G09440 AT4G08950	EXL1, PHI-1 EXL2 EXL4 EXO	At1g35140 (At1g35140/T32G9_32) mRNA, complete cds EXORDIUM like 2 EXORDIUM like 4 Phosphate-responsive 1 family protein
Wa8730a016g001550	1.70123	1.05433e-63	1.46995e-59	0.569	0.295	AT1G35140 AT5G64260 AT5G09440 AT4G08950	EXL1, PHI-1 EXL2 EXL4 EXO	At1g35140 (At1g35140/T32G9_32) mRNA, complete cds EXORDIUM like 2 EXORDIUM like 4 Phosphate-responsive 1 family protein
Wa8730a016g001560	1.00941	1.21642e-13	1.69594e-09	0.546	0.451	AT1G35140 AT5G64260 AT5G09440 AT4G08950	EXL1, PHI-1 EXL2 EXL4 EXO	At1g35140 (At1g35140/T32G9_32) mRNA, complete cds EXORDIUM like 2 EXORDIUM like 4 Phosphate-responsive 1 family protein
Wa8730a016g004010	1.06273	3.88446e-48	5.41571e-44	0.31	0.093
Wa8730a017g001840	1.37375	7.83538e-48	1.09241e-43	0.376	0.145	AT5G51460 AT4G12430 AT4G22590	ATTPPA, TPPA TPPF TPPG	homologous to the C-terminal part of microbial trehalose-6-phosphate phosphatases Haloacid dehalogenase-like hydrolase (HAD) superfamily protein Haloacid dehalogenase-like hydrolase (HAD) superfamily protein
Wa8730a017g002000	1.44459	2.90136e-29	4.04507e-25	0.553	0.421	AT4G12030 AT4G22840	BASS5, BAT5	Required for the biosynthesis of methionine-derived glucosinolates. Involved in the transport of 2-keto acids between chloroplasts and the cytosol. Sodium Bile acid symporter family
Wa8730a017g002670	1.4685	1.55197e-51	2.16375e-47	0.331	0.105	AT2G17890 AT4G36070 AT5G66210 AT5G24430	CPK16 CPK18 CPK28	member of Calcium Dependent Protein Kinase member of Calcium Dependent Protein Kinase member of Calcium Dependent Protein Kinase Calcium-dependent protein kinase (CDPK) family protein
Wa8730a017g003290	1.12723	2.92354e-20	4.076e-16	0.25	0.117	AT4G04955	ALN, ATALN	Encodes an allantoinase which is involved in allantoin degradation and assimilation. Gene expression was induced when allantoin was added to the medium. The insertion mutant, ataln m2-1, did not grow well on the MS medium where allantoin, instead of ammonium nitrate, was supplied.
Wa8730a017g003480	1.61336	2.59166e-78	3.61329e-74	0.742	0.476	AT5G03380 AT2G28090 AT2G36950		Heavy metal transport/detoxification superfamily protein Heavy metal transport/detoxification superfamily protein Heavy metal transport/detoxification superfamily protein
Wa8730a018g001290	1.32373	2.83706e-34	3.95544e-30	0.333	0.137	AT2G40340 AT2G38340 AT5G05410 AT3G11020 AT5G18450	AtERF48, DREB2C DREB19 DREB2, DREB2A DREB2, DREB2B	Encodes a member of the DREB subfamily A-2 of ERF/AP2 transcription factor family. The protein contains one AP2 domain. There are eight members in this subfamily including DREB2A AND DREB2B that are involved in response to drought. encodes a member of the DREB subfamily A-2 of ERF/AP2 transcription factor family. The protein contains one AP2 domain. There are eight members in this subfamily inclu…
Wa8730a018g001940	1.83748	9.64883e-73	1.34524e-68	0.397	0.114	AT2G41010 AT3G56880	ATCAMBP25, CAMBP25	Encodes a novel calmodulin binding protein whose gene expression is induced by dehydration and ionic (salt) and non-ionic (mannitol) osmotic stress. Lines over-expressing this gene are more sensitive and anti-sense lines are more tolerant to osmotic stress, suggesting this gene may be a negative regulator of response to osmotic stress. VQ motif-containing protein
Wa8730a019g000660	1.48605	1.57437e-55	2.19499e-51	0.32	0.091	AT5G59820 AT2G37430 AT2G28710 AT1G02030 AT5G03510 AT3G46070 AT3G53600	AtZAT12, RHL41, ZAT12 ZAT11	Encodes a zinc finger protein involved in high light and cold acclimation. Overexpression of this putative transcription factor increases the expression level of 9 cold-responsive genes and represses the expression level of 15 cold-responsive genes, including CBF genes. Also, lines overexpressing this gene exhibits a small but reproducible increase in freeze tolerance. Because of the repression o…
Wa8730a019g000680	2.10979	1.56426e-117	2.18089e-113	0.628	0.221	AT5G59820 AT2G37430 AT3G46090 AT2G28710 AT1G02030 AT5G03510 AT3G53600	AtZAT12, RHL41, ZAT12 ZAT11 ZAT7	Encodes a zinc finger protein involved in high light and cold acclimation. Overexpression of this putative transcription factor increases the expression level of 9 cold-responsive genes and represses the expression level of 15 cold-responsive genes, including CBF genes. Also, lines overexpressing this gene exhibits a small but reproducible increase in freeze tolerance. Because of the repression o…
Wa8730a019g002370	1.77872	2.22337e-22	3.09982e-18	0.512	0.395	AT4G15610 AT3G06390		Uncharacterised protein family (UPF0497) Uncharacterised protein family (UPF0497)
Wa8730a020g001680	1.6683	1.29285e-69	1.80249e-65	0.286	0.056	AT1G17420 AT1G67560	ATLOX3, LOX3 ATLOX6, LOX6	Lipoxygenase PLAT/LH2 domain-containing lipoxygenase family protein
Wa8730a004g004280	1.03745	1.74182e-55	2.42845e-51	0.229	0.042	AT5G11210	ATGLR2.5, GLR2.5	member of Putative ligand-gated ion channel subunit family
Wa8730a004g004350	1.44772	2.76887e-82	3.86036e-78	0.344	0.069	AT5G11210	ATGLR2.5, GLR2.5	member of Putative ligand-gated ion channel subunit family
Wa8730a007g002120	1.34513	3.18261e-45	4.43719e-41	0.284	0.087	AT3G25560 AT4G13810 AT5G48380 AT2G31880 AT1G12040 AT1G62440 AT1G78530 AT1G05700	AtNIK2, NIK2 AtRLP47, RLP47 BIR1 EVR, SOBIR1 LRX1 LRX2	NSP-interacting kinase 2 receptor like protein 47 Encodes a BAK1-interacting receptor-like kinase named BIR1. Negatively regulates multiple plant resistance signaling pathways, one of which is the SOBIR1(AT2G31880)-dependent pathway. Encodes a putative leucine rich repeat transmembrane protein that is expressed in response to Pseudomonas syringae. Expression of SRRLK may be required for silencing…
Wa8730a001g004430	1.051	1.16779e-12	1.62813e-08	0.352	0.255	AT1G08320	TGA9, bZIP21	bZIP transcription factor family protein
Wa8730a001g010390	1.06599	1.55763e-32	2.17164e-28	0.284	0.109
Wa8730a002g003970	1.19083	3.60746e-61	5.02953e-57	0.349	0.096	AT5G37690 AT5G41890 AT1G20132 AT1G75880		SGNH hydrolase-type esterase superfamily protein GDSL-motif esterase/acyltransferase/lipase. Enzyme group with broad substrate specificity that may catalyze acyltransfer or hydrolase reactions with lipid and non-lipid substrates. GDSL-motif esterase/acyltransferase/lipase. Enzyme group with broad substrate specificity that may catalyze acyltransfer or hydrolase reactions with lipid and non-lipid …
Wa8730a002g009830	1.22865	2.76121e-44	3.84968e-40	0.229	0.056	AT3G23530		Cyclopropane-fatty-acyl-phospholipid synthase
Wa8730a004g002900	1.00329	1.23295e-61	1.71898e-57	0.874	0.765	AT4G33010 AT2G26080	AtGLDP1, GLDP1 AtGLDP2, GLDP2	glycine decarboxylase P-protein 1 glycine decarboxylase P-protein 2
Wa8730a004g008230	1.22863	5.62255e-32	7.83895e-28	0.234	0.078
Wa8730a004g008240	1.19764	1.14924e-20	1.60227e-16	0.365	0.221
Wa8730a005g001280	1.30645	8.15729e-79	1.13729e-74	0.362	0.08	AT1G13150 AT4G39490 AT5G02900 AT4G32170 AT5G52320 AT2G21910 AT1G47620	CYP86C4 CYP96A10 CYP96A13 CYP96A2 CYP96A4 CYP96A5 CYP96A8	member of CYP86C member of CYP96A member of CYP96A member of CYP96A member of CYP96A member of CYP96A member of CYP96A
Wa8730a005g001920	1.19484	4.18843e-51	5.83951e-47	0.473	0.207	AT1G45130 AT3G13750 AT4G26140 AT3G52840 AT4G36360 AT5G56870 AT2G28470	AtBGAL5, BGAL5 BGAL1 BGAL12 BGAL2 BGAL3 BGAL4 BGAL8	beta-galactosidase 5 beta-galactosidase, glycosyl hydrolase family 35 putative beta-galactosidase beta-galactosidase 2 putative beta-galactosidase (BGAL3 gene) beta-galactosidase 4 putative beta-galactosidase (BGAL8 gene)
Wa8730a005g004510	1.04549	2.43803e-28	3.3991e-24	0.204	0.066	AT5G53050		alpha/beta-Hydrolases superfamily protein
Wa8730a005g006990	1.25118	6.33409e-41	8.831e-37	0.289	0.098	AT3G27870 AT1G68710 AT1G26130		ATPase E1-E2 type family protein / haloacid dehalogenase-like hydrolase family protein ATPase E1-E2 type family protein / haloacid dehalogenase-like hydrolase family protein ATPase E1-E2 type family protein / haloacid dehalogenase-like hydrolase family protein
Wa8730a005g007230	1.12337	6.60215e-69	9.20472e-65	0.787	0.517	AT1G67090 AT5G38420	RBCS1A RBCS2B	Encodes a member of the Rubisco small subunit (RBCS) multigene family: RBCS1A (At1g67090), RBCS1B (At5g38430), RBCS2B (At5g38420), and RBCS3B (At5g38410). Functions to yield sufficient Rubisco content for leaf photosynthetic capacity. Encodes a member of the Rubisco small subunit (RBCS) multigene family: RBCS1A (At1g67090), RBCS1B (At5g38430), RBCS2B (At5g38420), and RBCS3B (At5g38410).
Wa8730a005g007240	1.11333	1.70733e-85	2.38036e-81	0.91	0.719	AT1G67090 AT5G38430	RBCS1A RBCS1B	Encodes a member of the Rubisco small subunit (RBCS) multigene family: RBCS1A (At1g67090), RBCS1B (At5g38430), RBCS2B (At5g38420), and RBCS3B (At5g38410). Functions to yield sufficient Rubisco content for leaf photosynthetic capacity. Encodes a member of the Rubisco small subunit (RBCS) multigene family: RBCS1A (At1g67090), RBCS1B (At5g38430), RBCS2B (At5g38420), and RBCS3B (At5g38410).
Wa8730a006g002200	1.10986	2.25958e-36	3.15031e-32	0.494	0.287	AT5G63130 AT3G26510		Octicosapeptide/Phox/Bem1p family protein Octicosapeptide/Phox/Bem1p family protein
Wa8730a006g003250	2.42053	2.26126e-23	3.15264e-19	0.241	0.104	AT2G43590		Chitinase family protein
Wa8730a007g007390	1.08965	1.00916e-34	1.40697e-30	0.315	0.128	AT3G11670	DGD1	Responsible for the final assembly of galactolipids in photosynthetic membranes. Provides stability to the PS I core complex (e.g. subunits PsaD, PsaE).
Wa8730a008g004320	1.2133	1.09483e-35	1.52641e-31	0.447	0.243	AT4G04610 AT1G62180 AT4G21990	APR, APR1, ATAPR1, PRH19 APR2, APSR, ATAPR2, PRH, PRH43 APR3, ATAPR3, PRH-26, PRH26	Encodes a protein disulfide isomerase-like (PDIL) protein, a member of a multigene family within the thioredoxin (TRX) superfamily. This protein also belongs to the adenosine 5'-phosphosulfate reductase-like (APRL) group. encodes a adenosine 5'-phosphosulfate reductase, involved in sulfate assimilation. Is a major effect locus for natural variation of shoot sulfate content in Arabidopsis. Encodes…
Wa8730a010g004440	1.01469	3.60164e-11	5.02141e-07	0.21	0.117
Wa8730a012g004060	1.00599	1.4193e-34	1.97878e-30	0.207	0.057	AT5G37500 AT3G02850	GORK SKOR	Encodes a guard cell outward potassium channel. Belongs to the Shaker family K+ channel. This family includes five groups based on phylogenetic analysis (FEBS Letters (2007) 581: 2357): I (inward rectifying channel): AKT1 (AT2G26650), AKT5 (AT4G32500) and SPIK (also known as AKT6, AT2G25600) II (inward rectifying channel): KAT1 (AT5G46240) and KAT2 (AT4G18290) III (weakly inward rectifying channe…
Wa8730a013g004860	1.09246	1.14653e-74	1.59849e-70	0.855	0.653
Wa8730a014g006640	1.60204	1.91539e-17	2.67044e-13	0.129	0.041
Wa8730a015g005840	1.61052	7.46702e-69	1.04105e-64	0.246	0.038
Wa8730a017g003260	1.17174	2.13143e-37	2.97164e-33	0.218	0.06	AT3G19970		alpha/beta-Hydrolases superfamily protein
Wa8730a019g001460	1.85412	7.79326e-101	1.08654e-96	0.674	0.289	AT2G30490 AT2G40890	ATC4H, C4H, CYP73A5, REF3 CYP98A3	Encodes a cinnamate-4-hydroxylase. Mutations in this gene impact phenylpropanoid metabolism, growth and development. encodes coumarate 3-hydroxylase (C3H), a P450-dependent monooxygenase. Involved in lignin biosynthesis and flavonoid biosynthesis. Also affects the biosynthesis of coumarins such as scopoletin and scopolin as a branching-out-pathway from the phenylpropanoid acid level.
Wa8730a019g002340	1.44098	1.78066e-12	2.48259e-08	0.318	0.222	AT4G15610 AT3G06390		Uncharacterised protein family (UPF0497) Uncharacterised protein family (UPF0497)

## Sheet: SC A GO
Dataset S1. Enriched GO terms for Differentially Expressed Genes for Dusk Supercluster A
GO	Name	Ratio in Study	Ratio in Pop.	p Value	Depth	Study Count	p Value (BH-FDR)	Study Items
GO:0010025	wax biosynthetic process	14/161	48/13944	1.45033e-16	5	14	6.95112e-13	Wa8730a001g000420, Wa8730a009g000590, Wa8730a011g004580, Wa8730a011g004700, Wa8730a011g004730, Wa8730a011g004850, Wa8730a012g005240, Wa8730a013g005120, Wa8730a013g005140, Wa8730a014g005820, Wa8730a015g005080, Wa8730a015g005520, Wa8730a016g003000, Wa8730a018g002300
GO:0010166	wax metabolic process	14/161	49/13944	2.01045e-16	4	14	6.95112e-13	Wa8730a001g000420, Wa8730a009g000590, Wa8730a011g004580, Wa8730a011g004700, Wa8730a011g004730, Wa8730a011g004850, Wa8730a012g005240, Wa8730a013g005120, Wa8730a013g005140, Wa8730a014g005820, Wa8730a015g005080, Wa8730a015g005520, Wa8730a016g003000, Wa8730a018g002300
GO:1901570	fatty acid derivative biosynthetic process	14/161	51/13944	3.77333e-16	4	14	8.69753e-13	Wa8730a001g000420, Wa8730a009g000590, Wa8730a011g004580, Wa8730a011g004700, Wa8730a011g004730, Wa8730a011g004850, Wa8730a012g005240, Wa8730a013g005120, Wa8730a013g005140, Wa8730a014g005820, Wa8730a015g005080, Wa8730a015g005520, Wa8730a016g003000, Wa8730a018g002300
GO:1901568	fatty acid derivative metabolic process	14/161	61/13944	5.95152e-15	3	14	1.02887e-11	Wa8730a001g000420, Wa8730a009g000590, Wa8730a011g004580, Wa8730a011g004700, Wa8730a011g004730, Wa8730a011g004850, Wa8730a012g005240, Wa8730a013g005120, Wa8730a013g005140, Wa8730a014g005820, Wa8730a015g005080, Wa8730a015g005520, Wa8730a016g003000, Wa8730a018g002300
GO:0120251	hydrocarbon biosynthetic process	8/161	21/13944	4.75166e-11	4	8	6.57154e-08	Wa8730a001g011890, Wa8730a008g003940, Wa8730a011g004580, Wa8730a011g004700, Wa8730a011g004730, Wa8730a013g005120, Wa8730a013g005140, Wa8730a018g002300
GO:0120252	hydrocarbon metabolic process	8/161	27/13944	4.88809e-10	3	8	5.63353e-07	Wa8730a001g011890, Wa8730a008g003940, Wa8730a011g004580, Wa8730a011g004700, Wa8730a011g004730, Wa8730a013g005120, Wa8730a013g005140, Wa8730a018g002300
GO:0006629	lipid metabolic process	23/161	428/13944	7.59328e-10	3	23	7.50108e-07	Wa8730a001g000420, Wa8730a006g002600, Wa8730a006g004490, Wa8730a008g002540, Wa8730a009g000590, Wa8730a010g004870, Wa8730a011g004580, Wa8730a011g004700, Wa8730a011g004730, Wa8730a011g004850, Wa8730a012g003090, Wa8730a013g002080, Wa8730a013g005120, Wa8730a013g005140, Wa8730a015g005080, Wa8730a015g005520, Wa8730a016g001110, Wa8730a016g002030, Wa8730a017g002740, Wa8730a018g002300, Wa8730a018g003530, …
GO:0006723	cuticle hydrocarbon biosynthetic process	6/161	12/13944	1.88317e-09	5	6	1.30222e-06	Wa8730a011g004580, Wa8730a011g004700, Wa8730a011g004730, Wa8730a013g005120, Wa8730a013g005140, Wa8730a018g002300
GO:0043446	cellular alkane metabolic process	6/161	12/13944	1.88317e-09	4	6	1.30222e-06	Wa8730a011g004580, Wa8730a011g004700, Wa8730a011g004730, Wa8730a013g005120, Wa8730a013g005140, Wa8730a018g002300
GO:0043447	alkane biosynthetic process	6/161	12/13944	1.88317e-09	5	6	1.30222e-06	Wa8730a011g004580, Wa8730a011g004700, Wa8730a011g004730, Wa8730a013g005120, Wa8730a013g005140, Wa8730a018g002300
GO:0042335	cuticle development	7/161	30/13944	3.9092e-08	3	7	2.45746e-05	Wa8730a009g000590, Wa8730a011g004580, Wa8730a011g004700, Wa8730a011g004730, Wa8730a013g005120, Wa8730a013g005140, Wa8730a018g002300
GO:1901576	organic substance biosynthetic process	37/161	1255/13944	7.2841e-08	3	37	4.19746e-05	Wa8730a001g000420, Wa8730a001g004070, Wa8730a001g011890, Wa8730a003g005060, Wa8730a003g005260, Wa8730a005g001350, Wa8730a006g002600, Wa8730a006g004490, Wa8730a007g002540, Wa8730a008g002540, Wa8730a008g003940, Wa8730a009g000590, Wa8730a009g001620, Wa8730a009g003340, Wa8730a011g001270, Wa8730a011g004580, Wa8730a011g004700, Wa8730a011g004730, Wa8730a011g004850, Wa8730a012g003090, Wa8730a012g005240, …
GO:0009058	biosynthetic process	37/161	1302/13944	1.85814e-07	2	37	9.88388e-05	Wa8730a001g000420, Wa8730a001g004070, Wa8730a001g011890, Wa8730a003g005060, Wa8730a003g005260, Wa8730a005g001350, Wa8730a006g002600, Wa8730a006g004490, Wa8730a007g002540, Wa8730a008g002540, Wa8730a008g003940, Wa8730a009g000590, Wa8730a009g001620, Wa8730a009g003340, Wa8730a011g001270, Wa8730a011g004580, Wa8730a011g004700, Wa8730a011g004730, Wa8730a011g004850, Wa8730a012g003090, Wa8730a012g005240, …
GO:0006631	fatty acid metabolic process	10/161	113/13944	7.12162e-07	7	10	0.000351757	Wa8730a001g000420, Wa8730a006g004490, Wa8730a008g002540, Wa8730a009g000590, Wa8730a010g004870, Wa8730a016g001110, Wa8730a016g002030, Wa8730a018g003530, Wa8730a020g002750, Wa8730a020g002800
GO:0048235	pollen sperm cell differentiation	6/161	29/13944	8.22921e-07	4	6	0.000379367	Wa8730a011g004580, Wa8730a011g004700, Wa8730a011g004730, Wa8730a013g005120, Wa8730a013g005140, Wa8730a018g002300
GO:0042761	very long-chain fatty acid biosynthetic process	5/161	18/13944	1.46325e-06	9	5	0.000632399	Wa8730a006g004490, Wa8730a008g002540, Wa8730a009g000590, Wa8730a020g002750, Wa8730a020g002800
GO:0044255	cellular lipid metabolic process	17/161	378/13944	1.76044e-06	4	17	0.000716086	Wa8730a001g000420, Wa8730a006g002600, Wa8730a006g004490, Wa8730a008g002540, Wa8730a009g000590, Wa8730a010g004870, Wa8730a011g004850, Wa8730a012g003090, Wa8730a013g002080, Wa8730a015g005080, Wa8730a015g005520, Wa8730a016g001110, Wa8730a016g002030, Wa8730a017g002740, Wa8730a018g003530, Wa8730a020g002750, Wa8730a020g002800
GO:0009813	flavonoid biosynthetic process	6/161	35/13944	2.65547e-06	4	6	0.00102014	Wa8730a001g004070, Wa8730a009g001620, Wa8730a011g001270, Wa8730a015g004980, Wa8730a018g000750, Wa8730a019g003490
GO:0006633	fatty acid biosynthetic process	7/161	56/13944	3.46226e-06	8	7	0.00126008	Wa8730a006g004490, Wa8730a008g002540, Wa8730a009g000590, Wa8730a016g001110, Wa8730a018g003530, Wa8730a020g002750, Wa8730a020g002800
GO:0000038	very long-chain fatty acid metabolic process	5/161	24/13944	6.8633e-06	8	5	0.00237299	Wa8730a006g004490, Wa8730a008g002540, Wa8730a009g000590, Wa8730a020g002750, Wa8730a020g002800
GO:0032787	monocarboxylic acid metabolic process	12/161	219/13944	8.88525e-06	6	12	0.00292578	Wa8730a001g000420, Wa8730a006g004490, Wa8730a007g002540, Wa8730a008g002540, Wa8730a008g004080, Wa8730a009g000590, Wa8730a010g004870, Wa8730a016g001110, Wa8730a016g002030, Wa8730a018g003530, Wa8730a020g002750, Wa8730a020g002800
GO:0008610	lipid biosynthetic process	13/161	259/13944	9.62321e-06	4	13	0.00302475	Wa8730a006g002600, Wa8730a006g004490, Wa8730a008g002540, Wa8730a009g000590, Wa8730a011g004850, Wa8730a012g003090, Wa8730a013g002080, Wa8730a015g005080, Wa8730a015g005520, Wa8730a016g001110, Wa8730a018g003530, Wa8730a020g002750, Wa8730a020g002800
GO:0055046	microgametogenesis	6/161	44/13944	1.05991e-05	2	6	0.00305388	Wa8730a011g004580, Wa8730a011g004700, Wa8730a011g004730, Wa8730a013g005120, Wa8730a013g005140, Wa8730a018g002300
GO:0009812	flavonoid metabolic process	6/161	44/13944	1.05991e-05	3	6	0.00305388	Wa8730a001g004070, Wa8730a009g001620, Wa8730a011g001270, Wa8730a015g004980, Wa8730a018g000750, Wa8730a019g003490
GO:0072330	monocarboxylic acid biosynthetic process	8/161	120/13944	7.46187e-05	7	8	0.0198457	Wa8730a006g004490, Wa8730a007g002540, Wa8730a008g002540, Wa8730a009g000590, Wa8730a016g001110, Wa8730a018g003530, Wa8730a020g002750, Wa8730a020g002800
GO:0030497	fatty acid elongation	3/161	8/13944	8.10858e-05	9	3	0.0201667	Wa8730a008g002540, Wa8730a009g000590, Wa8730a016g001110
GO:0048232	male gamete generation	6/161	67/13944	0.000120411	4	6	0.0268593	Wa8730a011g004580, Wa8730a011g004700, Wa8730a011g004730, Wa8730a013g005120, Wa8730a013g005140, Wa8730a018g002300
GO:0080167	response to karrikin	6/161	68/13944	0.000130816	3	6	0.0282685	Wa8730a003g006990, Wa8730a006g005060, Wa8730a009g001620, Wa8730a012g005240, Wa8730a015g004980, Wa8730a018g000750
GO:0007276	gamete generation	6/161	75/13944	0.000225204	3	6	0.0452325	Wa8730a011g004580, Wa8730a011g004700, Wa8730a011g004730, Wa8730a013g005120, Wa8730a013g005140, Wa8730a018g002300
GO:0022412	cellular process involved in reproduction in multicellular organism	6/161	76/13944	0.000242201	2	6	0.0465228	Wa8730a011g004580, Wa8730a011g004700, Wa8730a011g004730, Wa8730a013g005120, Wa8730a013g005140, Wa8730a018g002300
GO:0043170	macromolecule metabolic process	11/161	2515/13944	7.22098e-05	3	11	0.0198457	Wa8730a001g000420, Wa8730a001g010900, Wa8730a006g001790, Wa8730a008g003940, Wa8730a008g004200, Wa8730a009g003340, Wa8730a013g004070, Wa8730a015g003690, Wa8730a017g002740, Wa8730a017g003810, Wa8730a019g003750
GO:0034641	cellular nitrogen compound metabolic process	5/161	1681/13944	8.16582e-05	3	5	0.0201667	Wa8730a001g010900, Wa8730a006g001790, Wa8730a009g003340, Wa8730a013g002080, Wa8730a018g003530
GO:0090304	nucleic acid metabolic process	2/161	1196/13944	0.000103899	5	2	0.0247745	Wa8730a006g001790, Wa8730a009g003340
GO:0046483	heterocycle metabolic process	4/161	1543/13944	0.000111079	3	4	0.0256038	Wa8730a006g001790, Wa8730a009g003340, Wa8730a013g002080, Wa8730a018g003530
GO:0006807	nitrogen compound metabolic process	15/161	2865/13944	0.000170203	2	15	0.0356654	Wa8730a001g010900, Wa8730a006g001790, Wa8730a008g002540, Wa8730a008g003940, Wa8730a008g004200, Wa8730a009g000590, Wa8730a009g003340, Wa8730a013g002080, Wa8730a013g004070, Wa8730a015g003690, Wa8730a017g002740, Wa8730a017g003810, Wa8730a018g003530, Wa8730a019g003490, Wa8730a019g003750
GO:0006996	organelle organization	1/161	954/13944	0.000228942	4	1	0.0452325	Wa8730a017g002730
GO:0005783	endoplasmic reticulum	28/161	549/13944	2.93234e-11	5	28	3.14934e-08	Wa8730a001g000420, Wa8730a001g011890, Wa8730a002g009950, Wa8730a003g006990, Wa8730a006g004490, Wa8730a007g006900, Wa8730a008g002540, Wa8730a009g000590, Wa8730a009g001620, Wa8730a009g001730, Wa8730a011g001270, Wa8730a011g004580, Wa8730a011g004700, Wa8730a011g004730, Wa8730a011g004850, Wa8730a013g005120, Wa8730a013g005140, Wa8730a014g005820, Wa8730a015g005080, Wa8730a015g005520, Wa8730a016g003000, …
GO:0012505	endomembrane system	31/161	1104/13944	4.49703e-06	2	31	0.0024149	Wa8730a001g000420, Wa8730a001g011890, Wa8730a002g009950, Wa8730a003g006990, Wa8730a005g001350, Wa8730a005g003480, Wa8730a006g004490, Wa8730a007g002540, Wa8730a007g006900, Wa8730a008g002540, Wa8730a009g000590, Wa8730a009g001620, Wa8730a009g001730, Wa8730a011g001270, Wa8730a011g004580, Wa8730a011g004700, Wa8730a011g004730, Wa8730a011g004850, Wa8730a013g005120, Wa8730a013g005140, Wa8730a014g005820, …
GO:0009922	fatty acid elongase activity	5/161	9/13944	2.34084e-08	6	5	5.5361e-05	Wa8730a003g005060, Wa8730a003g005260, Wa8730a009g000590, Wa8730a014g005820, Wa8730a016g003000
GO:0016746	transferase activity, transferring acyl groups	11/161	129/13944	2.84287e-07	3	11	0.000336169	Wa8730a003g005060, Wa8730a003g005260, Wa8730a009g000590, Wa8730a010g004870, Wa8730a011g004850, Wa8730a013g002080, Wa8730a014g005820, Wa8730a015g005080, Wa8730a015g005520, Wa8730a016g003000, Wa8730a018g003530
GO:0004312	fatty acid synthase activity	5/161	15/13944	5.27441e-07	5	5	0.0004158	Wa8730a003g005060, Wa8730a003g005260, Wa8730a009g000590, Wa8730a014g005820, Wa8730a016g003000
GO:0045703	ketoreductase activity	4/161	8/13944	1.15617e-06	4	4	0.000683583	Wa8730a006g004490, Wa8730a020g002750, Wa8730a020g002780, Wa8730a020g002800
GO:0016491	oxidoreductase activity	18/161	465/13944	7.08055e-06	2	18	0.0033491	Wa8730a001g010900, Wa8730a001g011890, Wa8730a006g004320, Wa8730a006g004490, Wa8730a007g006900, Wa8730a009g000590, Wa8730a011g001270, Wa8730a011g004580, Wa8730a011g004700, Wa8730a011g004730, Wa8730a013g005120, Wa8730a013g005140, Wa8730a017g002740, Wa8730a018g002300, Wa8730a019g001620, Wa8730a020g002750, Wa8730a020g002780, Wa8730a020g002800
GO:0016747	transferase activity, transferring acyl groups other than amino-acyl groups	9/161	118/13944	8.9047e-06	4	9	0.00350994	Wa8730a003g005060, Wa8730a003g005260, Wa8730a009g000590, Wa8730a010g004870, Wa8730a011g004850, Wa8730a014g005820, Wa8730a015g005080, Wa8730a015g005520, Wa8730a016g003000
GO:0018454	acetoacetyl-CoA reductase activity	3/161	7/13944	5.11122e-05	5	3	0.0172686	Wa8730a006g004490, Wa8730a020g002750, Wa8730a020g002800
GO:0045430	chalcone isomerase activity	2/161	2/13944	0.000132496	4	2	0.0391691	Wa8730a009g001620, Wa8730a018g000750

## Sheet: SC B GO
Dataset S1. Enriched GO terms for Differentially Expressed Genes for Dusk Supercluster B
GO	Name	Ratio in Study	Ratio in Pop.	p Value	Depth	Study Count	p Value (BH-FDR)	Study Items
GO:0009768	photosynthesis, light harvesting in photosystem I	8/50	14/13944	4.48471e-17	5	8	3.10118e-13	Wa8730a001g008310, Wa8730a004g004970, Wa8730a006g005790, Wa8730a007g002830, Wa8730a007g005080, Wa8730a009g000670, Wa8730a009g005910, Wa8730a012g005370
GO:0009765	photosynthesis, light harvesting	8/50	31/13944	1.12557e-13	4	8	3.89166e-10	Wa8730a001g008310, Wa8730a004g004970, Wa8730a006g005790, Wa8730a007g002830, Wa8730a007g005080, Wa8730a009g000670, Wa8730a009g005910, Wa8730a012g005370
GO:0015979	photosynthesis	9/50	86/13944	1.71438e-11	3	9	3.95164e-08	Wa8730a001g008310, Wa8730a004g004970, Wa8730a006g005330, Wa8730a006g005790, Wa8730a007g002830, Wa8730a007g005080, Wa8730a009g000670, Wa8730a009g005910, Wa8730a012g005370
GO:0019684	photosynthesis, light reaction	8/50	72/13944	1.52967e-10	4	8	2.64441e-07	Wa8730a001g008310, Wa8730a004g004970, Wa8730a006g005790, Wa8730a007g002830, Wa8730a007g005080, Wa8730a009g000670, Wa8730a009g005910, Wa8730a012g005370
GO:0009645	response to low light intensity stimulus	4/50	8/13944	1.01309e-08	6	4	1.40111e-05	Wa8730a001g008310, Wa8730a009g000670, Wa8730a009g005910, Wa8730a012g005370
GO:0006091	generation of precursor metabolites and energy	8/50	172/13944	1.57253e-07	3	8	0.000181235	Wa8730a001g008310, Wa8730a004g004970, Wa8730a006g005790, Wa8730a007g002830, Wa8730a007g005080, Wa8730a009g000670, Wa8730a009g005910, Wa8730a012g005370
GO:0009416	response to light stimulus	11/50	418/13944	2.00717e-07	4	11	0.000198279	Wa8730a001g006760, Wa8730a001g008310, Wa8730a004g004970, Wa8730a006g005330, Wa8730a006g005790, Wa8730a007g002830, Wa8730a007g005080, Wa8730a009g000670, Wa8730a009g005910, Wa8730a012g005370, Wa8730a016g002350
GO:0009314	response to radiation	11/50	460/13944	5.21764e-07	3	11	0.000451	Wa8730a001g006760, Wa8730a001g008310, Wa8730a004g004970, Wa8730a006g005330, Wa8730a006g005790, Wa8730a007g002830, Wa8730a007g005080, Wa8730a009g000670, Wa8730a009g005910, Wa8730a012g005370, Wa8730a016g002350
GO:0009644	response to high light intensity	5/50	53/13944	1.21713e-06	6	5	0.000935159	Wa8730a001g008310, Wa8730a004g004970, Wa8730a009g000670, Wa8730a009g005910, Wa8730a012g005370
GO:0009642	response to light intensity	6/50	108/13944	2.26153e-06	5	6	0.00156385	Wa8730a001g006760, Wa8730a001g008310, Wa8730a004g004970, Wa8730a009g000670, Wa8730a009g005910, Wa8730a012g005370
GO:0009409	response to cold	7/50	220/13944	1.24154e-05	4	7	0.00378867	Wa8730a001g008310, Wa8730a005g005360, Wa8730a006g005330, Wa8730a009g000670, Wa8730a009g005910, Wa8730a010g002220, Wa8730a012g005370
GO:0009769	photosynthesis, light harvesting in photosystem II	2/50	2/13944	1.26015e-05	5	2	0.00378867	Wa8730a004g004970, Wa8730a009g005910
GO:0031117	positive regulation of microtubule depolymerization	2/50	2/13944	1.26015e-05	10	2	0.00378867	Wa8730a005g005360, Wa8730a010g002220
GO:0071325	cellular response to mannitol stimulus	2/50	2/13944	1.26015e-05	6	2	0.00378867	Wa8730a005g005360, Wa8730a010g002220
GO:0035865	cellular response to potassium ion	2/50	2/13944	1.26015e-05	6	2	0.00378867	Wa8730a005g005360, Wa8730a010g002220
GO:0006498	N-terminal protein lipidation	2/50	2/13944	1.26015e-05	8	2	0.00378867	Wa8730a005g005360, Wa8730a010g002220
GO:0018377	protein myristoylation	2/50	2/13944	1.26015e-05	8	2	0.00378867	Wa8730a005g005360, Wa8730a010g002220
GO:0010350	cellular response to magnesium starvation	2/50	2/13944	1.26015e-05	7	2	0.00378867	Wa8730a005g005360, Wa8730a010g002220
GO:0072709	cellular response to sorbitol	2/50	2/13944	1.26015e-05	6	2	0.00378867	Wa8730a005g005360, Wa8730a010g002220
GO:0035864	response to potassium ion	2/50	2/13944	1.26015e-05	5	2	0.00378867	Wa8730a005g005360, Wa8730a010g002220
GO:0006499	N-terminal protein myristoylation	2/50	2/13944	1.26015e-05	9	2	0.00378867	Wa8730a005g005360, Wa8730a010g002220
GO:0031115	negative regulation of microtubule polymerization	2/50	2/13944	1.26015e-05	10	2	0.00378867	Wa8730a005g005360, Wa8730a010g002220
GO:0071280	cellular response to copper ion	2/50	2/13944	1.26015e-05	6	2	0.00378867	Wa8730a005g005360, Wa8730a010g002220
GO:0071286	cellular response to magnesium ion	2/50	3/13944	3.77178e-05	6	2	0.00869394	Wa8730a005g005360, Wa8730a010g002220
GO:0031111	negative regulation of microtubule polymerization or depolymerization	2/50	3/13944	3.77178e-05	9	2	0.00869394	Wa8730a005g005360, Wa8730a010g002220
GO:0075733	intracellular transport of virus	2/50	3/13944	3.77178e-05	6	2	0.00869394	Wa8730a005g005360, Wa8730a010g002220
GO:0032026	response to magnesium ion	2/50	3/13944	3.77178e-05	5	2	0.00869394	Wa8730a005g005360, Wa8730a010g002220
GO:0031114	regulation of microtubule depolymerization	2/50	3/13944	3.77178e-05	9	2	0.00869394	Wa8730a005g005360, Wa8730a010g002220
GO:1901881	positive regulation of protein depolymerization	2/50	3/13944	3.77178e-05	7	2	0.00869394	Wa8730a005g005360, Wa8730a010g002220
GO:0043243	positive regulation of protein-containing complex disassembly	2/50	3/13944	3.77178e-05	6	2	0.00869394	Wa8730a005g005360, Wa8730a010g002220
GO:0051511	negative regulation of unidimensional cell growth	2/50	4/13944	7.52624e-05	7	2	0.015307	Wa8730a005g005360, Wa8730a010g002220
GO:0031112	positive regulation of microtubule polymerization or depolymerization	2/50	4/13944	7.52624e-05	9	2	0.015307	Wa8730a005g005360, Wa8730a010g002220
GO:0031113	regulation of microtubule polymerization	2/50	4/13944	7.52624e-05	9	2	0.015307	Wa8730a005g005360, Wa8730a010g002220
GO:0072708	response to sorbitol	2/50	4/13944	7.52624e-05	5	2	0.015307	Wa8730a005g005360, Wa8730a010g002220
GO:0009628	response to abiotic stimulus	13/50	1086/13944	8.43053e-05	2	13	0.0166563	Wa8730a001g006760, Wa8730a001g008310, Wa8730a004g004970, Wa8730a005g005360, Wa8730a006g005330, Wa8730a006g005790, Wa8730a007g002830, Wa8730a007g005080, Wa8730a009g000670, Wa8730a009g005910, Wa8730a010g002220, Wa8730a012g005370, Wa8730a016g002350
GO:0010218	response to far red light	3/50	27/13944	0.000119429	6	3	0.0227739	Wa8730a007g005080, Wa8730a009g000670, Wa8730a009g005910
GO:0019755	one-carbon compound transport	2/50	5/13944	0.00012515	7	2	0.0227739	Wa8730a005g003170, Wa8730a005g003250
GO:0031110	regulation of microtubule polymerization or depolymerization	2/50	5/13944	0.00012515	8	2	0.0227739	Wa8730a005g005360, Wa8730a010g002220
GO:0009266	response to temperature stimulus	7/50	321/13944	0.000136992	3	7	0.0242898	Wa8730a001g008310, Wa8730a005g005360, Wa8730a006g005330, Wa8730a009g000670, Wa8730a009g005910, Wa8730a010g002220, Wa8730a012g005370
GO:0010114	response to red light	3/50	31/13944	0.000181689	6	3	0.0308366	Wa8730a007g005080, Wa8730a009g000670, Wa8730a009g005910
GO:0019058	viral life cycle	2/50	6/13944	0.000187294	4	2	0.0308366	Wa8730a005g005360, Wa8730a010g002220
GO:0046794	transport of virus	2/50	6/13944	0.000187294	5	2	0.0308366	Wa8730a005g005360, Wa8730a010g002220
GO:0009743	response to carbohydrate	4/50	87/13944	0.000261559	4	4	0.0393268	Wa8730a001g006760, Wa8730a005g005360, Wa8730a006g005330, Wa8730a010g002220
GO:0070507	regulation of microtubule cytoskeleton organization	2/50	7/13944	0.00026161	7	2	0.0393268	Wa8730a005g005360, Wa8730a010g002220
GO:0071219	cellular response to molecule of bacterial origin	2/50	7/13944	0.00026161	5	2	0.0393268	Wa8730a005g005360, Wa8730a010g002220
GO:0046688	response to copper ion	2/50	7/13944	0.00026161	5	2	0.0393268	Wa8730a005g005360, Wa8730a010g002220
GO:0044766	multi-organism transport	2/50	8/13944	0.000348014	4	2	0.0491125	Wa8730a005g005360, Wa8730a010g002220
GO:0010555	response to mannitol	2/50	8/13944	0.000348014	5	2	0.0491125	Wa8730a005g005360, Wa8730a010g002220
GO:1902579	multi-organism localization	2/50	8/13944	0.000348014	2	2	0.0491125	Wa8730a005g005360, Wa8730a010g002220
GO:0010287	plastoglobule	9/50	53/13944	1.80357e-13	2	9	1.93704e-10	Wa8730a001g008310, Wa8730a004g004970, Wa8730a006g005790, Wa8730a007g002830, Wa8730a007g005080, Wa8730a009g000670, Wa8730a009g002620, Wa8730a009g005910, Wa8730a012g005370
GO:0009535	chloroplast thylakoid membrane	11/50	197/13944	7.81622e-11	6	11	3.6652e-08	Wa8730a001g008310, Wa8730a004g004970, Wa8730a006g005330, Wa8730a006g005790, Wa8730a007g002830, Wa8730a007g005080, Wa8730a009g000670, Wa8730a009g002620, Wa8730a009g004480, Wa8730a009g005910, Wa8730a012g005370
GO:0055035	plastid thylakoid membrane	11/50	202/13944	1.0238e-10	5	11	3.6652e-08	Wa8730a001g008310, Wa8730a004g004970, Wa8730a006g005330, Wa8730a006g005790, Wa8730a007g002830, Wa8730a007g005080, Wa8730a009g000670, Wa8730a009g002620, Wa8730a009g004480, Wa8730a009g005910, Wa8730a012g005370
GO:0042651	thylakoid membrane	11/50	215/13944	1.99954e-10	4	11	4.51376e-08	Wa8730a001g008310, Wa8730a004g004970, Wa8730a006g005330, Wa8730a006g005790, Wa8730a007g002830, Wa8730a007g005080, Wa8730a009g000670, Wa8730a009g002620, Wa8730a009g004480, Wa8730a009g005910, Wa8730a012g005370
GO:0034357	photosynthetic membrane	11/50	216/13944	2.10138e-10	3	11	4.51376e-08	Wa8730a001g008310, Wa8730a004g004970, Wa8730a006g005330, Wa8730a006g005790, Wa8730a007g002830, Wa8730a007g005080, Wa8730a009g000670, Wa8730a009g002620, Wa8730a009g004480, Wa8730a009g005910, Wa8730a012g005370
GO:0009534	chloroplast thylakoid	11/50	247/13944	8.76076e-10	5	11	1.46392e-07	Wa8730a001g008310, Wa8730a004g004970, Wa8730a006g005330, Wa8730a006g005790, Wa8730a007g002830, Wa8730a007g005080, Wa8730a009g000670, Wa8730a009g002620, Wa8730a009g004480, Wa8730a009g005910, Wa8730a012g005370
GO:0031976	plastid thylakoid	11/50	249/13944	9.54138e-10	4	11	1.46392e-07	Wa8730a001g008310, Wa8730a004g004970, Wa8730a006g005330, Wa8730a006g005790, Wa8730a007g002830, Wa8730a007g005080, Wa8730a009g000670, Wa8730a009g002620, Wa8730a009g004480, Wa8730a009g005910, Wa8730a012g005370
GO:0009579	thylakoid	11/50	306/13944	8.28488e-09	3	11	1.11224e-06	Wa8730a001g008310, Wa8730a004g004970, Wa8730a006g005330, Wa8730a006g005790, Wa8730a007g002830, Wa8730a007g005080, Wa8730a009g000670, Wa8730a009g002620, Wa8730a009g004480, Wa8730a009g005910, Wa8730a012g005370
GO:0009941	chloroplast envelope	11/50	353/13944	3.61625e-08	5	11	4.31539e-06	Wa8730a001g008310, Wa8730a004g004970, Wa8730a005g003170, Wa8730a006g005330, Wa8730a006g005790, Wa8730a007g002830, Wa8730a007g005080, Wa8730a009g000670, Wa8730a009g002620, Wa8730a009g005910, Wa8730a012g005370
GO:0009526	plastid envelope	11/50	369/13944	5.68683e-08	4	11	6.10766e-06	Wa8730a001g008310, Wa8730a004g004970, Wa8730a005g003170, Wa8730a006g005330, Wa8730a006g005790, Wa8730a007g002830, Wa8730a007g005080, Wa8730a009g000670, Wa8730a009g002620, Wa8730a009g005910, Wa8730a012g005370
GO:0009570	chloroplast stroma	11/50	450/13944	4.19464e-07	3	11	4.0955e-05	Wa8730a001g008310, Wa8730a004g004970, Wa8730a006g005330, Wa8730a006g005790, Wa8730a007g002830, Wa8730a007g005080, Wa8730a009g000490, Wa8730a009g000670, Wa8730a009g002620, Wa8730a009g005910, Wa8730a012g005370
GO:0009532	plastid stroma	11/50	459/13944	5.10625e-07	2	11	4.57009e-05	Wa8730a001g008310, Wa8730a004g004970, Wa8730a006g005330, Wa8730a006g005790, Wa8730a007g002830, Wa8730a007g005080, Wa8730a009g000490, Wa8730a009g000670, Wa8730a009g002620, Wa8730a009g005910, Wa8730a012g005370
GO:0031967	organelle envelope	11/50	584/13944	5.33561e-06	3	11	0.000409318	Wa8730a001g008310, Wa8730a004g004970, Wa8730a005g003170, Wa8730a006g005330, Wa8730a006g005790, Wa8730a007g002830, Wa8730a007g005080, Wa8730a009g000670, Wa8730a009g002620, Wa8730a009g005910, Wa8730a012g005370
GO:0031975	envelope	11/50	584/13944	5.33561e-06	2	11	0.000409318	Wa8730a001g008310, Wa8730a004g004970, Wa8730a005g003170, Wa8730a006g005330, Wa8730a006g005790, Wa8730a007g002830, Wa8730a007g005080, Wa8730a009g000670, Wa8730a009g002620, Wa8730a009g005910, Wa8730a012g005370
GO:0009507	chloroplast	16/50	1296/13944	6.57954e-06	6	16	0.000471095	Wa8730a001g008310, Wa8730a004g004970, Wa8730a005g003170, Wa8730a005g005360, Wa8730a006g005330, Wa8730a006g005790, Wa8730a007g002830, Wa8730a007g005080, Wa8730a009g000490, Wa8730a009g000670, Wa8730a009g002620, Wa8730a009g004480, Wa8730a009g005910, Wa8730a010g002220, Wa8730a010g003550, Wa8730a012g005370
GO:0009536	plastid	16/50	1339/13944	9.99718e-06	5	16	0.00067106	Wa8730a001g008310, Wa8730a004g004970, Wa8730a005g003170, Wa8730a005g005360, Wa8730a006g005330, Wa8730a006g005790, Wa8730a007g002830, Wa8730a007g005080, Wa8730a009g000490, Wa8730a009g000670, Wa8730a009g002620, Wa8730a009g004480, Wa8730a009g005910, Wa8730a010g002220, Wa8730a010g003550, Wa8730a012g005370
GO:0030076	light-harvesting complex	2/50	2/13944	1.26015e-05	2	2	0.000712317	Wa8730a007g005080, Wa8730a009g005910
GO:0009517	PSII associated light-harvesting complex II	2/50	2/13944	1.26015e-05	5	2	0.000712317	Wa8730a007g005080, Wa8730a009g005910
GO:0009503	thylakoid light-harvesting complex	2/50	2/13944	1.26015e-05	4	2	0.000712317	Wa8730a007g005080, Wa8730a009g005910
GO:0031984	organelle subcompartment	11/50	679/13944	2.20769e-05	2	11	0.00118553	Wa8730a001g008310, Wa8730a004g004970, Wa8730a006g005330, Wa8730a006g005790, Wa8730a007g002830, Wa8730a007g005080, Wa8730a009g000670, Wa8730a009g002620, Wa8730a009g004480, Wa8730a009g005910, Wa8730a012g005370
GO:0009523	photosystem II	2/50	4/13944	7.52624e-05	4	2	0.00367417	Wa8730a007g005080, Wa8730a009g005910
GO:0042807	central vacuole	2/50	4/13944	7.52624e-05	7	2	0.00367417	Wa8730a005g003170, Wa8730a005g003250
GO:0009521	photosystem	2/50	8/13944	0.000348014	3	2	0.0162507	Wa8730a007g005080, Wa8730a009g005910
GO:0031226	intrinsic component of plasma membrane	5/50	181/13944	0.000460349	3	5	0.0206006	Wa8730a004g001700, Wa8730a005g003170, Wa8730a005g003250, Wa8730a005g005360, Wa8730a010g002220
GO:0098807	chloroplast thylakoid membrane protein complex	2/50	10/13944	0.000556747	3	2	0.0229979	Wa8730a007g005080, Wa8730a009g005910
GO:0005634	nucleus	0/50	2088/13944	0.000491899	5	0	0.021132
GO:0031409	pigment binding	8/50	13/13944	1.92718e-17	2	8	4.55779e-14	Wa8730a001g008310, Wa8730a004g004970, Wa8730a006g005790, Wa8730a007g002830, Wa8730a007g005080, Wa8730a009g000670, Wa8730a009g005910, Wa8730a012g005370
GO:0016168	chlorophyll binding	8/50	16/13944	1.91173e-16	4	8	2.26063e-13	Wa8730a001g008310, Wa8730a004g004970, Wa8730a006g005790, Wa8730a007g002830, Wa8730a007g005080, Wa8730a009g000670, Wa8730a009g005910, Wa8730a012g005370
GO:0046906	tetrapyrrole binding	8/50	27/13944	3.20182e-14	3	8	2.5241e-11	Wa8730a001g008310, Wa8730a004g004970, Wa8730a006g005790, Wa8730a007g002830, Wa8730a007g005080, Wa8730a009g000670, Wa8730a009g005910, Wa8730a012g005370
GO:0019904	protein domain specific binding	7/50	53/13944	6.69522e-10	3	7	3.95855e-07	Wa8730a001g008310, Wa8730a004g004970, Wa8730a006g005330, Wa8730a007g005080, Wa8730a009g000670, Wa8730a009g005910, Wa8730a012g005370
GO:0043168	anion binding	10/50	298/13944	8.24514e-08	3	10	3.89995e-05	Wa8730a001g008310, Wa8730a004g004970, Wa8730a005g005360, Wa8730a006g005790, Wa8730a007g002830, Wa8730a007g005080, Wa8730a009g000670, Wa8730a009g005910, Wa8730a010g002220, Wa8730a012g005370
GO:0043325	phosphatidylinositol-3,4-bisphosphate binding	2/50	2/13944	1.26015e-05	4	2	0.00496709	Wa8730a005g005360, Wa8730a010g002220
GO:0043167	ion binding	10/50	537/13944	1.68875e-05	2	10	0.00570558	Wa8730a001g008310, Wa8730a004g004970, Wa8730a005g005360, Wa8730a006g005790, Wa8730a007g002830, Wa8730a007g005080, Wa8730a009g000670, Wa8730a009g005910, Wa8730a010g002220, Wa8730a012g005370
GO:0005547	phosphatidylinositol-3,4,5-trisphosphate binding	2/50	3/13944	3.77178e-05	6	2	0.0111503	Wa8730a005g005360, Wa8730a010g002220
GO:0080025	phosphatidylinositol-3,5-bisphosphate binding	2/50	6/13944	0.000187294	7	2	0.0492166	Wa8730a005g005360, Wa8730a010g002220

## Sheet: SC C GO
Dataset S1. Enriched GO terms for Differentially Expressed Genes for Dusk Supercluster C
GO	Name	Ratio in Study	Ratio in Pop.	p Value	Depth	Study Count	p Value (BH-FDR)	Study Items
GO:0046520	sphingoid biosynthetic process	8/112	15/13944	8.25567e-14	8	8	5.7088e-10	Wa8730a009g003140, Wa8730a009g003160, Wa8730a009g003220, Wa8730a012g005020, Wa8730a014g001670, Wa8730a014g002160, Wa8730a014g002170, Wa8730a014g002180
GO:0046519	sphingoid metabolic process	8/112	27/13944	2.62963e-11	7	8	9.09194e-08	Wa8730a009g003140, Wa8730a009g003160, Wa8730a009g003220, Wa8730a012g005020, Wa8730a014g001670, Wa8730a014g002160, Wa8730a014g002170, Wa8730a014g002180
GO:0009640	photomorphogenesis	9/112	47/13944	1.06065e-10	6	9	2.44479e-07	Wa8730a009g003140, Wa8730a009g003160, Wa8730a009g003220, Wa8730a012g005020, Wa8730a014g001670, Wa8730a014g002160, Wa8730a014g002170, Wa8730a014g002180, Wa8730a020g000340
GO:0030148	sphingolipid biosynthetic process	8/112	36/13944	3.37597e-10	7	8	5.8362e-07	Wa8730a009g003140, Wa8730a009g003160, Wa8730a009g003220, Wa8730a012g005020, Wa8730a014g001670, Wa8730a014g002160, Wa8730a014g002170, Wa8730a014g002180
GO:0097164	ammonium ion metabolic process	8/112	42/13944	1.26528e-09	3	8	1.74988e-06	Wa8730a009g003140, Wa8730a009g003160, Wa8730a009g003220, Wa8730a012g005020, Wa8730a014g001670, Wa8730a014g002160, Wa8730a014g002170, Wa8730a014g002180
GO:0006665	sphingolipid metabolic process	8/112	44/13944	1.87482e-09	6	8	2.16073e-06	Wa8730a009g003140, Wa8730a009g003160, Wa8730a009g003220, Wa8730a012g005020, Wa8730a014g001670, Wa8730a014g002160, Wa8730a014g002170, Wa8730a014g002180
GO:0046467	membrane lipid biosynthetic process	8/112	66/13944	5.24893e-08	6	8	5.18519e-05	Wa8730a009g003140, Wa8730a009g003160, Wa8730a009g003220, Wa8730a012g005020, Wa8730a014g001670, Wa8730a014g002160, Wa8730a014g002170, Wa8730a014g002180
GO:0009639	response to red or far red light	9/112	97/13944	7.96847e-08	5	9	6.88775e-05	Wa8730a009g003140, Wa8730a009g003160, Wa8730a009g003220, Wa8730a012g005020, Wa8730a014g001670, Wa8730a014g002160, Wa8730a014g002170, Wa8730a014g002180, Wa8730a020g000340
GO:0006643	membrane lipid metabolic process	8/112	73/13944	1.1726e-07	5	8	9.00949e-05	Wa8730a009g003140, Wa8730a009g003160, Wa8730a009g003220, Wa8730a012g005020, Wa8730a014g001670, Wa8730a014g002160, Wa8730a014g002170, Wa8730a014g002180
GO:0043170	macromolecule metabolic process	4/112	2515/13944	5.73951e-06	3	4	0.00396887	Wa8730a009g001780, Wa8730a011g003440, Wa8730a013g005770, Wa8730a020g000340
GO:0016020	membrane	37/112	2296/13944	1.54989e-05	2	37	0.0166458	Wa8730a001g006600, Wa8730a001g007510, Wa8730a001g007820, Wa8730a003g003040, Wa8730a003g004980, Wa8730a004g001070, Wa8730a005g002760, Wa8730a005g006310, Wa8730a006g002120, Wa8730a007g000220, Wa8730a008g003840, Wa8730a008g004040, Wa8730a009g000440, Wa8730a009g003140, Wa8730a009g003160, Wa8730a009g003220, Wa8730a009g003530, Wa8730a009g004350, Wa8730a010g000090, Wa8730a011g003030, Wa8730a011g003440, …
GO:0031090	organelle membrane	19/112	847/13944	4.11574e-05	3	19	0.0221015	Wa8730a001g006600, Wa8730a001g007510, Wa8730a004g001070, Wa8730a005g006310, Wa8730a007g000220, Wa8730a009g000440, Wa8730a009g003140, Wa8730a009g003160, Wa8730a009g003220, Wa8730a009g004350, Wa8730a010g000090, Wa8730a012g005020, Wa8730a013g001590, Wa8730a013g005830, Wa8730a014g001670, Wa8730a014g002160, Wa8730a014g002170, Wa8730a014g002180, Wa8730a014g004370
GO:0055044	symplast	12/112	419/13944	0.000135532	2	12	0.0232304	Wa8730a001g007090, Wa8730a003g003040, Wa8730a006g004140, Wa8730a006g004370, Wa8730a009g000440, Wa8730a009g003530, Wa8730a009g004260, Wa8730a009g004310, Wa8730a009g004350, Wa8730a013g005830, Wa8730a017g002190, Wa8730a017g002540
GO:0009506	plasmodesma	12/112	419/13944	0.000135532	5	12	0.0232304	Wa8730a001g007090, Wa8730a003g003040, Wa8730a006g004140, Wa8730a006g004370, Wa8730a009g000440, Wa8730a009g003530, Wa8730a009g004260, Wa8730a009g004310, Wa8730a009g004350, Wa8730a013g005830, Wa8730a017g002190, Wa8730a017g002540
GO:0098800	inner mitochondrial membrane protein complex	5/112	62/13944	0.000137353	3	5	0.0232304	Wa8730a001g007510, Wa8730a005g006310, Wa8730a007g000220, Wa8730a013g001590, Wa8730a014g004370
GO:0005911	cell-cell junction	12/112	424/13944	0.000151408	4	12	0.0232304	Wa8730a001g007090, Wa8730a003g003040, Wa8730a006g004140, Wa8730a006g004370, Wa8730a009g000440, Wa8730a009g003530, Wa8730a009g004260, Wa8730a009g004310, Wa8730a009g004350, Wa8730a013g005830, Wa8730a017g002190, Wa8730a017g002540
GO:0070161	anchoring junction	12/112	424/13944	0.000151408	3	12	0.0232304	Wa8730a001g007090, Wa8730a003g003040, Wa8730a006g004140, Wa8730a006g004370, Wa8730a009g000440, Wa8730a009g003530, Wa8730a009g004260, Wa8730a009g004310, Wa8730a009g004350, Wa8730a013g005830, Wa8730a017g002190, Wa8730a017g002540
GO:0030054	cell junction	12/112	435/13944	0.000192039	2	12	0.0241135	Wa8730a001g007090, Wa8730a003g003040, Wa8730a006g004140, Wa8730a006g004370, Wa8730a009g000440, Wa8730a009g003530, Wa8730a009g004260, Wa8730a009g004310, Wa8730a009g004350, Wa8730a013g005830, Wa8730a017g002190, Wa8730a017g002540
GO:0071944	cell periphery	25/112	1421/13944	0.000202068	2	25	0.0241135	Wa8730a001g006600, Wa8730a001g007090, Wa8730a001g007820, Wa8730a003g003040, Wa8730a004g001070, Wa8730a005g002760, Wa8730a006g002120, Wa8730a006g004140, Wa8730a006g004370, Wa8730a008g003840, Wa8730a009g000440, Wa8730a009g003530, Wa8730a009g004260, Wa8730a009g004310, Wa8730a009g004350, Wa8730a011g003030, Wa8730a011g003440, Wa8730a012g004900, Wa8730a013g004170, Wa8730a013g005630, Wa8730a013g005830, …
GO:0042284	sphingolipid delta-4 desaturase activity	8/112	11/13944	2.17395e-15	4	8	5.14138e-12	Wa8730a009g003140, Wa8730a009g003160, Wa8730a009g003220, Wa8730a012g005020, Wa8730a014g001670, Wa8730a014g002160, Wa8730a014g002170, Wa8730a014g002180
GO:0016705	oxidoreductase activity, acting on paired donors, with incorporation or reduction of molecular oxygen	11/112	91/13944	1.50618e-10	3	11	1.78105e-07	Wa8730a005g001430, Wa8730a009g003140, Wa8730a009g003160, Wa8730a009g003220, Wa8730a012g005020, Wa8730a013g001900, Wa8730a014g001670, Wa8730a014g002160, Wa8730a014g002170, Wa8730a014g002180, Wa8730a015g000910
GO:0016491	oxidoreductase activity	18/112	465/13944	2.94425e-08	2	18	2.32105e-05	Wa8730a001g007090, Wa8730a002g004600, Wa8730a005g001430, Wa8730a006g004140, Wa8730a006g004370, Wa8730a009g003140, Wa8730a009g003160, Wa8730a009g003220, Wa8730a012g005020, Wa8730a013g001900, Wa8730a013g005820, Wa8730a013g005830, Wa8730a014g001670, Wa8730a014g002160, Wa8730a014g002170, Wa8730a014g002180, Wa8730a015g000910, Wa8730a018g002950

## Sheet: SC D GO
Dataset S1. Enriched GO terms for Differentially Expressed Genes for Dusk Supercluster D
GO	Name	Ratio in Study	Ratio in Pop.	p Value	Depth	Study Count	p Value (BH-FDR)	Study Items
GO:1901700	response to oxygen-containing compound	29/180	795/13944	3.53306e-07	3	29	0.00244311	Wa8730a001g003830, Wa8730a001g004430, Wa8730a001g007370, Wa8730a001g011840, Wa8730a003g004240, Wa8730a004g000410, Wa8730a004g006020, Wa8730a004g008480, Wa8730a005g003750, Wa8730a007g000980, Wa8730a007g002940, Wa8730a007g007390, Wa8730a010g000800, Wa8730a010g001420, Wa8730a010g003440, Wa8730a011g003230, Wa8730a011g003790, Wa8730a013g001140, Wa8730a013g005360, Wa8730a015g000740, Wa8730a015g002550, …
GO:0042493	response to drug	15/180	288/13944	4.92329e-06	3	15	0.00680891	Wa8730a001g003830, Wa8730a001g004430, Wa8730a001g007370, Wa8730a004g008620, Wa8730a005g003750, Wa8730a010g001420, Wa8730a011g003230, Wa8730a011g003790, Wa8730a015g000740, Wa8730a015g002550, Wa8730a017g002000, Wa8730a018g001290, Wa8730a019g000660, Wa8730a019g000680, Wa8730a020g000110
GO:0009737	response to abscisic acid	14/180	270/13944	1.0831e-05	5	14	0.0124827	Wa8730a001g011840, Wa8730a003g004240, Wa8730a004g006020, Wa8730a004g008480, Wa8730a005g003750, Wa8730a007g000980, Wa8730a007g002940, Wa8730a010g000800, Wa8730a011g003230, Wa8730a011g003790, Wa8730a017g002670, Wa8730a018g000270, Wa8730a018g001130, Wa8730a018g001290
GO:0097305	response to alcohol	14/180	276/13944	1.38805e-05	4	14	0.0125377	Wa8730a001g011840, Wa8730a003g004240, Wa8730a004g006020, Wa8730a004g008480, Wa8730a005g003750, Wa8730a007g000980, Wa8730a007g002940, Wa8730a010g000800, Wa8730a011g003230, Wa8730a011g003790, Wa8730a017g002670, Wa8730a018g000270, Wa8730a018g001130, Wa8730a018g001290
GO:0001101	response to acid chemical	21/180	578/13944	1.81441e-05	3	21	0.0139407	Wa8730a001g004430, Wa8730a001g011840, Wa8730a003g004240, Wa8730a004g000410, Wa8730a004g006020, Wa8730a004g008480, Wa8730a005g003750, Wa8730a007g000980, Wa8730a007g002940, Wa8730a007g007390, Wa8730a010g000800, Wa8730a010g003440, Wa8730a011g003230, Wa8730a011g003790, Wa8730a013g001140, Wa8730a013g005360, Wa8730a017g002000, Wa8730a017g002670, Wa8730a018g000270, Wa8730a018g001130, Wa8730a018g001290
GO:0070887	cellular response to chemical stimulus	20/180	541/13944	2.2726e-05	3	20	0.0146508	Wa8730a001g003830, Wa8730a001g004430, Wa8730a001g011840, Wa8730a003g004240, Wa8730a004g000410, Wa8730a004g002910, Wa8730a004g006020, Wa8730a004g008480, Wa8730a004g008620, Wa8730a005g003750, Wa8730a005g004220, Wa8730a007g007390, Wa8730a010g000800, Wa8730a011g003230, Wa8730a013g004490, Wa8730a015g002550, Wa8730a017g002670, Wa8730a018g000270, Wa8730a019g000660, Wa8730a019g000680
GO:0010200	response to chitin	7/180	68/13944	2.6534e-05	5	7	0.0152902	Wa8730a001g003830, Wa8730a001g007370, Wa8730a011g003790, Wa8730a015g000740, Wa8730a015g002550, Wa8730a019g000660, Wa8730a019g000680
GO:0071229	cellular response to acid chemical	11/180	190/13944	3.59405e-05	4	11	0.0191176	Wa8730a001g004430, Wa8730a001g011840, Wa8730a003g004240, Wa8730a004g000410, Wa8730a004g006020, Wa8730a005g003750, Wa8730a007g007390, Wa8730a010g000800, Wa8730a011g003230, Wa8730a017g002670, Wa8730a018g000270
GO:0042221	response to chemical	36/180	1392/13944	4.51252e-05	2	36	0.0222886	Wa8730a001g003830, Wa8730a001g004430, Wa8730a001g007370, Wa8730a001g011840, Wa8730a002g005830, Wa8730a003g004240, Wa8730a004g000410, Wa8730a004g002900, Wa8730a004g002910, Wa8730a004g006020, Wa8730a004g008480, Wa8730a004g008620, Wa8730a005g003750, Wa8730a005g004220, Wa8730a006g003250, Wa8730a007g000980, Wa8730a007g002940, Wa8730a007g007390, Wa8730a010g000800, Wa8730a010g001420, Wa8730a010g003440, …
GO:0033993	response to lipid	15/180	375/13944	0.000106212	4	15	0.0471152	Wa8730a001g011840, Wa8730a003g004240, Wa8730a004g006020, Wa8730a004g008480, Wa8730a005g003750, Wa8730a007g000980, Wa8730a007g002940, Wa8730a010g000800, Wa8730a010g003440, Wa8730a011g003230, Wa8730a011g003790, Wa8730a017g002670, Wa8730a018g000270, Wa8730a018g001130, Wa8730a018g001290
GO:0010243	response to organonitrogen compound	9/180	146/13944	0.00011558	4	9	0.0471152	Wa8730a001g003830, Wa8730a001g007370, Wa8730a005g003750, Wa8730a006g003250, Wa8730a011g003790, Wa8730a015g000740, Wa8730a015g002550, Wa8730a019g000660, Wa8730a019g000680
GO:0010033	response to organic substance	27/180	939/13944	0.000117293	3	27	0.0471152	Wa8730a001g003830, Wa8730a001g004430, Wa8730a001g007370, Wa8730a001g011840, Wa8730a002g005830, Wa8730a003g004240, Wa8730a004g000410, Wa8730a004g006020, Wa8730a004g008480, Wa8730a005g003750, Wa8730a006g003250, Wa8730a007g000980, Wa8730a007g002940, Wa8730a007g007390, Wa8730a010g000800, Wa8730a010g003440, Wa8730a011g003230, Wa8730a011g003790, Wa8730a015g000740, Wa8730a015g002550, Wa8730a017g002000, …
GO:0046483	heterocycle metabolic process	3/180	1543/13944	2.01613e-06	3	3	0.00594486	Wa8730a003g006350, Wa8730a007g000380, Wa8730a017g003290
GO:0034641	cellular nitrogen compound metabolic process	4/180	1681/13944	2.57912e-06	3	4	0.00594486	Wa8730a003g006350, Wa8730a005g003350, Wa8730a007g000380, Wa8730a017g003290
GO:0006807	nitrogen compound metabolic process	14/180	2865/13944	4.01886e-06	2	14	0.00680891	Wa8730a001g003830, Wa8730a003g006350, Wa8730a004g002900, Wa8730a005g003350, Wa8730a006g002900, Wa8730a007g000380, Wa8730a010g000800, Wa8730a011g003790, Wa8730a014g001980, Wa8730a014g006110, Wa8730a017g002000, Wa8730a017g002670, Wa8730a017g003290, Wa8730a018g000270
GO:0006139	nucleobase-containing compound metabolic process	3/180	1390/13944	1.4505e-05	4	3	0.0125377	Wa8730a003g006350, Wa8730a007g000380, Wa8730a017g003290
GO:0090304	nucleic acid metabolic process	2/180	1196/13944	2.33056e-05	5	2	0.0146508	Wa8730a003g006350, Wa8730a007g000380
GO:0043170	macromolecule metabolic process	14/180	2515/13944	0.000122643	3	14	0.0471152	Wa8730a001g003830, Wa8730a001g006070, Wa8730a002g003450, Wa8730a003g006350, Wa8730a005g005110, Wa8730a006g002900, Wa8730a007g000380, Wa8730a010g000800, Wa8730a013g005360, Wa8730a014g001980, Wa8730a014g006110, Wa8730a015g004680, Wa8730a017g002670, Wa8730a018g000270
GO:0015399	primary active transmembrane transporter activity	8/180	87/13944	1.61747e-05	4	8	0.0191265	Wa8730a001g005100, Wa8730a004g008230, Wa8730a004g008240, Wa8730a005g006990, Wa8730a009g006210, Wa8730a015g003240, Wa8730a015g003250, Wa8730a020g000110
GO:0042626	ATPase-coupled transmembrane transporter activity	8/180	87/13944	1.61747e-05	5	8	0.0191265	Wa8730a001g005100, Wa8730a004g008230, Wa8730a004g008240, Wa8730a005g006990, Wa8730a009g006210, Wa8730a015g003240, Wa8730a015g003250, Wa8730a020g000110
