# Supplementary material for: Streamlined spatial and environmental expression signatures characterize the minimalist duckweedWolffia australiana
Source: HighWire-hosted journal article supplement (doi:10.1101/gr.279091.124), 2024-07-01
Supplement: Supplemental_Dataset_S2.xlsx [file Supplemental_Dataset_S2.xlsx]

## Sheet: Above Water vs Below Water DEGs
Dataset S2. DEGs for Terrestial vs. Submerged tissues - Bulk RNA-Seq
Genes showing significant differential expression (log2FC>1 & p_val_adj <0.05) with a minimum total read count >10 across all samples
Base Mean: the average of the normalized count values, dividing by size factors, taken over all samples in the DESeqDataSet.
Up-regulated in terrestial (dorsal) tissue: log2FC>0
Up-regulated in submerged (ventral) tissue: log2FC<0
Gene	Base Mean	Log2 FC	p Value	p Value Adj.	Arabidopsis Orthologues	Arabidopsis Gene Names	Gene Description
Wa8730a005g008440	14.1773	6.75953	4.37e-06	0.000335766	AT1G48480 AT1G68400 AT1G18390	RKL1	Arabidopsis thaliana receptor-like protein kinase (RKL1) gene leucine-rich repeat transmembrane protein kinase family protein Encodes a plasma membrane localized protein involved in ABA signaling.
Wa8730a009g002870	5.69993	6.43808	0.000114003	0.00696692	AT5G04950 AT1G09240	ATNAS1, NAS1 ATNAS3, NAS3	Encodes a nicotianamide synthase. Encodes a nicotianamine synthase.
Wa8730a002g009150	37.5181	4.98027	6.3e-13	1.37e-10	AT1G65060 AT4G19010	4CL3	encodes an isoform of 4-coumarate:CoA ligase (4CL), which is involved in the last step of the general phenylpropanoid pathway. mRNA levels are not induced in response to wounding or to fungal infection by P. parasitica. mRNA is expressed in flowers, to a lesser degree in mature leaves and siliques and marginally in seedling roots and bolting stems of mature plants. The catalytic efficiency was in…
Wa8730a004g004940	83.8122	4.80377	6.97e-25	4.88e-22	AT2G20835
Wa8730a014g000520	26.8981	4.75563	1.39e-09	2e-07	AT5G65800 AT4G37770 AT3G49700	ACS5, ATACS5, CIN5, ETO2 ACS8 ACS9, AtACS9, ETO3	1-aminocyclopropane-1-carboxylate synthase (ACS) is encoded by a multigene family consisting of at least five members whose expression is induced by hormones, developmental signals, and protein synthesis inhibition. Encodes an auxin inducible ACC synthase. encodes a a member of the 1-aminocyclopropane-1-carboxylate (ACC) synthase (S-adenosyl-L-methionine methylthioadenosine-lyase, EC 4.4.1.14) ge…
Wa8730a006g002230	24.8851	4.62486	2.49e-08	2.97e-06	AT4G14480 AT5G14720		Encodes a putative Ser/Thr protein kinase, BLUS1 (BLUE LIGHT SIGNALING1). BLUS1 functions as a phototropin substrate and primary regulator of stomatal control to enhance photosynthetic CO2 assimilation under natural light conditions. Protein kinase superfamily protein
Wa8730a008g003520	49.6467	4.59007	4.92e-14	1.29e-11
Wa8730a006g002600	97.0205	4.47026	9.35e-05	0.00582629	AT1G79460	ATKS, ATKS1, GA2, KS, KS1	Encodes for a protein with ent-kaurene synthase B activity which catalyzes the second step in the cyclization of GGPP to ent-kaurene in the gibberellins biosynthetic pathway.
Wa8730a008g000260	117.107	4.2864	4.31e-30	3.88e-27	AT3G63240		DNAse I-like superfamily protein
Wa8730a005g002820	17.8572	4.19755	3.25e-06	0.000263661
Wa8730a018g003320	104.006	4.16538	7.41e-22	4.24e-19
Wa8730a014g001630	1156.79	4.15977	2.01e-61	2.53e-57
Wa8730a016g000060	47.6208	4.09854	7.07e-14	1.81e-11	AT1G69560 AT3G29020 AT1G26780 AT5G39700	ATMYB105, LOF2, MYB105 AtMYB110, MYB110 AtMYB117, LOF1, MYB117 AtMYB89, MYB89	Encodes LOF2 (LATERAL ORGAN FUSION2), a MYB-domain transcription factor expressed in organ boundaries. Functions in boundary specification, meristem initiation and maintenance, and organ patterning. Also see LOF1 (At1g26780). Encodes a putative transcription factor (MYB110). Encodes LOF1 (LATERAL ORGAN FUSION1), a MYB-domain transcription factor expressed in organ boundaries. Functions in boundar…
Wa8730a004g008520	122.487	4.05466	1.48e-22	8.9e-20	AT3G16340 AT2G26910 AT1G15520	ABCG29, ATPDR1, AtABCG29, PDR1 ABCG32, ATPDR4, AtABCG32, PDR4, PEC1 ABCG40, ATABCG40, ATPDR12, PDR12	Encodes a p-coumaryl alcohol exporter involved in lignin biosynthesis. Encodes a member of the PLEIOTROPIC DRUG RESISTANCE family of ATP binding cassette transporters. Required for the formation of a functional cuticle. ABC transporter family involved in ABA transport and resistance to lead. Localizes to plasma membrane. Upregulated by lead. Expressed in leaves, flowers, stomata and roots.
Wa8730a005g002950	15.4576	3.95189	1.8e-05	0.00127324	AT3G22540 AT1G79770 AT5G25840		Protein of unknown function (DUF1677) Protein of unknown function (DUF1677) Protein of unknown function (DUF1677)
Wa8730a008g002870	58.3037	3.91505	4.65e-15	1.3e-12	AT2G30550 AT1G06800 AT1G30370	DALL3 DALL4, PLA-I{gamma}1 DLAH	Encodes a lipase that hydrolyzes phosphatidylcholine, glycolipids as well as triacylglycerols. Encodes a lipase that hydrolyzes phosphatidylcholine, glycolipids as well as triacylglycerols. Encodes a mitochondria-localized class III phospholipase A1 that plays a role in seed viability.
Wa8730a013g005940	23.7051	3.89367	2.02e-06	0.000172975	AT1G01340 AT4G01010 AT2G28260	ACBK1, ATCNGC10, CNGC10 ATCNGC13, CNGC13 ATCNGC15, CNGC15	member of Cyclic nucleotide gated channel family member of Cyclic nucleotide gated channel family member of Cyclic nucleotide gated channel family
Wa8730a011g004700	411.307	3.87471	1.02e-13	2.46e-11	AT5G57800	CER3, FLP1, WAX2, YRE	encodes a transmembrane protein with similarity to the sterol desaturase family at the N-terminus and to the short-chain dehydrogenase/reductase family at the C-terminus. Mutant analyses indicate this protein is involved in cuticle membrane and wax biosynthesis.
Wa8730a001g012110	195.764	3.84852	1.8e-32	2.52e-29	AT3G54040		PAR1 protein
Wa8730a018g003250	25.6867	3.84262	9.83e-08	1.08e-05	AT3G17640 AT4G03010		Leucine-rich repeat (LRR) family protein RNI-like superfamily protein
Wa8730a007g005240	21.8447	3.78957	2.41e-06	0.000202529	AT1G33060 AT2G02450	ANAC014, NAC014 ANAC034, ANAC035, AtLOV1, LOV1, NAC035	NAC 014 NAC domain containing protein 35
Wa8730a006g000190	161.068	3.78887	1.23e-31	1.41e-28	AT4G21380 AT4G04540 AT4G00970 AT1G54820 AT1G11340 AT4G27290 AT1G61390	ARK3, RK3 CRK39 CRK41	encodes a putative receptor-like serine/threonine protein kinases that is similar to Brassica self-incompatibility (S) locus. Expressed in root. Shoot expression limited to limited to the root-hypocotyl transition zone and at the base of lateral roots as well as in axillary buds, and pedicels. Encodes a cysteine-rich receptor-like protein kinase. Encodes a cysteine-rich receptor-like protein kina…
Wa8730a020g002750	235.232	3.55576	5.48e-37	1.38e-33	AT1G67730 AT1G24470	ATKCR1, KCR1, YBR159 ATKCR2, KCR2	Encodes one of the two Arabidopsis homologues to YBR159w encoding a S. cerevisiae beta-ketoacyl reductase (KCR), which catalyzes the first reduction during VLCFA (very long chain fatty acids, >18 carbon) elongation: KCR1 (At1g67730), KCR2 (At1g24470). Complementation of the yeast ybr159Delta mutant demonstrated that the two KCR proteins are divergent and that only AtKCR1 can restore heterologous …
Wa8730a017g001630	33.8345	3.54914	6.17e-09	8.09e-07	AT1G12480	CDI3, OZS1, RCD3, SLAC1	Encodes a membrane protein with 10 predicted transmembrane helices. SLAC1 is a multispanning membrane protein expressed predominantly in guard cells that plays a role in regulating cellular ion homeostasis and S-type anion currents. SLAC1 is important for normal stomatal closure in response to a variety of signals including elevated CO2, ozone, ABA, darkness, and humidity. SLAC1:GFP localizes to …
Wa8730a009g001610	1773.59	3.54065	5.47e-10	8.29e-08	AT5G59320	LTP3	Predicted to encode a PR (pathogenesis-related) protein. Belongs to the lipid transfer protein (PR-14) family with the following members: At2g38540/LTP1, At2g38530/LTP2, At5g59320/LTP3, At5g59310/LTP4, At3g51600/LTP5, At3g08770/LTP6, At2g15050/LTP7, At2g18370/LTP8, At2g15325/LTP9, At5g01870/LTP10, At4g33355/LTP11, At3g51590/LTP12, At5g44265/LTP13, At5g62065/LTP14, At4g08530/LTP15.
Wa8730a001g001120	119.498	3.48134	1.15e-19	5.15e-17
Wa8730a005g005530	383.904	3.39718	1.81e-41	1.14e-37	AT3G49190		O-acyltransferase (WSD1-like) family protein
Wa8730a004g004950	70.4499	3.37658	3.05e-14	8.18e-12	AT2G20835
Wa8730a004g004350	142.885	3.36329	6.05e-19	2.46e-16	AT5G11210	ATGLR2.5, GLR2.5	member of Putative ligand-gated ion channel subunit family
Wa8730a008g005930	282.062	3.35749	5.5e-29	4.62e-26	AT4G21380 AT4G28350 AT1G50610 AT4G03230 AT1G61610 AT4G27290 AT1G11300	ARK3, RK3 LecRK-VII.2 PRK5	encodes a putative receptor-like serine/threonine protein kinases that is similar to Brassica self-incompatibility (S) locus. Expressed in root. Shoot expression limited to limited to the root-hypocotyl transition zone and at the base of lateral roots as well as in axillary buds, and pedicels. Concanavalin A-like lectin protein kinase family protein Leucine-rich repeat protein kinase family prote…
Wa8730a005g000390	22.4834	3.34139	1.21e-05	0.000883387
Wa8730a013g001050	69.3713	3.33667	1.06e-12	2.26e-10	AT1G01580 AT5G23990	ATFRO2, FRD1, FRO2 ATFRO5, FRO5	Encodes the low-iron-inducible ferric chelate reductase responsible for reduction of iron at the root surface. It is likely to be the major Fe(III) chelate reductase in Arabidopsis iron metabolism. Coordinately regulated with IRT1, the major transporter responsible for high-affinity iron uptake from the soil, at both transcriptional and posttranscriptional levels. Steady state mRNA levels are reg…
Wa8730a001g004310	106.828	3.32931	8.26e-19	3.25e-16	AT5G04950 AT5G56080 AT1G09240 AT1G56430	ATNAS1, NAS1 ATNAS2, NAS2 ATNAS3, NAS3 ATNAS4, NAS4	Encodes a nicotianamide synthase. Encodes a protein with nicotianamine synthase activity. Its transcript levels rise in roots in response to zinc deficiency and rise in leaves in response to elevated levels of zinc. Encodes a nicotianamine synthase. Encodes a protein with nicotianamine synthase activity.
Wa8730a005g002580	13.5808	3.32213	0.000862482	0.0429162	AT5G25610	ATRD22, RD22	responsive to dehydration 22 (RD22) mediated by ABA
Wa8730a008g000640	361.732	3.32121	4e-39	1.26e-35
Wa8730a017g002260	60.5172	3.31134	6.07e-09	8.04e-07
Wa8730a004g004920	42.2283	3.30709	6.73e-09	8.56e-07	AT2G20835
Wa8730a008g003430	352.19	3.27395	0.000105244	0.00649466
Wa8730a012g005240	242.327	3.26813	1.06e-06	9.84e-05	AT3G28910 AT1G74650 AT4G12350 AT1G08810 AT3G47600	ATMYB30, MYB30 ATMYB31, ATY13, MYB31 AtMYB42, MYB42 AtMYB60, MYB60 ATMYB94, ATMYBCP70, MYB94	transcription factor myb homologue Member of the R2R3 factor gene family. Encodes a putative transcription factor (MYB42). putative transcription factor of the R2R3-MYB gene family. Transcript increases under conditions that promote stomatal opening (white and blue light, abi1-1 mutation) and decreases under conditions that trigger stomatal closure (ABA, desiccation, darkness), with the exception…
Wa8730a017g004380	18.5541	3.25666	0.000130518	0.00782424	AT1G73500	ATMKK9, MKK9	member of MAP Kinase Kinase family. Autophosphorylates and also phosphorylates MPK3 and MPK6. Independently involved in ethylene and calmalexin biosynthesis. Induces transcription of ACS2, ACS6, ERF1, ERF2, ERF5, ERF6, CYP79B2, CYP79B3, CYP71A13 and PAD3.
Wa8730a006g002750	98.9268	3.23561	1.16e-13	2.76e-11	AT1G78080 AT1G22190 AT4G13620	AtWIND1, RAP2.4, WIND1 RAP2.4	Encodes a member of the DREB subfamily A-6 of ERF/AP2 transcription factor family (RAP2.4). The protein contains one AP2 domain. Role in mediating light and ethylene signaling. The gene encodes a putative transcription factor belongings to the abiotic stress-associated DREB A-6 clade. The mRNA is cell-to-cell mobile. encodes a member of the DREB subfamily A-6 of ERF/AP2 transcription factor famil…
Wa8730a019g001620	388.487	3.20692	5.98e-33	9.42e-30	AT3G66658 AT1G44170	ALDH22A1 ALDH3H1, ALDH4	Encodes a putative aldehyde dehydrogenase. The gene is not responsive to osmotic stress and is expressed constitutively at a low level in plantlets and root cultures. Encodes a protein similar to the aldehyde dehydrogenase cp-ADH from C.plantagineum. Constitutively expressed at low levels.
Wa8730a007g005430	35.3272	3.17919	1.28e-07	1.36e-05	AT5G16080 AT5G23530	AtCXE17, CXE17 AtCXE18, CXE18	carboxyesterase 17 carboxyesterase 18
Wa8730a009g002900	313.856	3.17899	1.09e-35	2.28e-32	AT1G19190		alpha/beta-Hydrolases superfamily protein
Wa8730a007g003310	2742.75	3.16199	2.01e-40	8.43e-37	AT1G74110	CYP78A10	member of CYP78A
Wa8730a009g001270	53.9689	3.15828	9.6e-10	1.41e-07	AT3G55500 AT5G05290 AT5G39280 AT2G37640 AT2G28950 AT2G40610 AT5G02260	ATEXP16, ATEXPA16, ATHEXP, EXP16, EXPA16 ATEXP2, ATEXPA2, ATHEXP, EXP2, EXPA2 ATEXP23, ATEXPA23, ATHEXP, EXPA23 ATEXP3, ATEXPA3, ATHEXP, EXP3 ATEXP6, ATEXPA6, ATHEXP, EXPA6 ATEXP8, ATEXPA8, ATHEXP, EXP8, EXPA8 ATEXP9, ATEXPA9, ATHEXP, EXP9, EXPA9	expansin-like protein. Naming convention from the Expansin Working Group (Kende et al, 2004. Plant Mol Bio). Involved in the formation of nematode-induced syncytia in roots of Arabidopsis thaliana. Encodes an expansin. Naming convention from the Expansin Working Group (Kende et al, 2004. Plant Mol Bio) member of Alpha-Expansin Gene Family. Naming convention from the Expansin Working Group (Kende …
Wa8730a009g004930	78.0765	3.15454	1.35e-13	3.15e-11	AT5G34850 AT1G56360	ATPAP26, PAP26 ATPAP6, PAP6	Encodes a dual-targeted purple acid phosphatase isozyme AtPAP26. Involved in phosphate metabolism. purple acid phosphatase 6
Wa8730a002g004360	61.4566	3.15386	2.55e-11	4.95e-09	AT1G71120 AT5G41890 AT4G16230 AT1G20130 AT1G75890	GLIP6	Contains lipase signature motif and GDSL domain. GDSL-motif esterase/acyltransferase/lipase. Enzyme group with broad substrate specificity that may catalyze acyltransfer or hydrolase reactions with lipid and non-lipid substrates. GDSL-motif esterase/acyltransferase/lipase. Enzyme group with broad substrate specificity that may catalyze acyltransfer or hydrolase reactions with lipid and non-lipid …
Wa8730a005g003460	49.5235	3.14773	3.12e-09	4.32e-07	AT5G25610	ATRD22, RD22	responsive to dehydration 22 (RD22) mediated by ABA
Wa8730a015g003690	144.457	3.13436	5.33e-18	1.81e-15	AT3G07680	p24beta2	Encodes an Golgi-localized p24 protein. Interacts with p24delta5 at ER export sites for ER exit and coupled transport to the Golgi apparatus. The mRNA is cell-to-cell mobile.
Wa8730a010g005560	29.2459	3.12468	2.2e-06	0.000185616	AT4G26330 AT5G59090	ATSBT3.18, UNE17 ATSBT4.12, SBT4.12	Subtilisin-like serine endopeptidase family protein subtilase 4.12
Wa8730a012g001710	95.8844	3.12353	9.03e-16	2.71e-13	AT5G63790	ANAC102, NAC102	Encodes a member of the NAC family of transcription factors. ANAC102 appears to have a role in mediating response to low oxygen stress (hypoxia) in germinating seedlings.
Wa8730a005g003450	68.6079	3.08336	3.65e-11	6.96e-09	AT5G25610	ATRD22, RD22	responsive to dehydration 22 (RD22) mediated by ABA
Wa8730a006g002740	28.494	3.06877	3.99e-05	0.00263107	AT1G78080 AT1G22190 AT4G13620	AtWIND1, RAP2.4, WIND1 RAP2.4	Encodes a member of the DREB subfamily A-6 of ERF/AP2 transcription factor family (RAP2.4). The protein contains one AP2 domain. Role in mediating light and ethylene signaling. The gene encodes a putative transcription factor belongings to the abiotic stress-associated DREB A-6 clade. The mRNA is cell-to-cell mobile. encodes a member of the DREB subfamily A-6 of ERF/AP2 transcription factor famil…
Wa8730a005g004920	265.511	3.06016	0.000480516	0.0257413
Wa8730a006g000980	640.666	3.00177	0.000817335	0.0409937	AT3G22120 AT4G15160 AT1G62500	CWLP	cell wall-plasma membrane linker protein homolog (CWLP) Bifunctional inhibitor/lipid-transfer protein/seed storage 2S albumin superfamily protein Bifunctional inhibitor/lipid-transfer protein/seed storage 2S albumin superfamily protein
Wa8730a011g004850	130.36	2.9851	6.39e-15	1.75e-12
Wa8730a014g001620	159.054	2.96274	1.64e-19	6.9e-17
Wa8730a015g005520	254.488	2.94949	3.21e-21	1.68e-18
Wa8730a011g004580	181.483	2.93373	3.42e-05	0.00229231	AT5G57800	CER3, FLP1, WAX2, YRE	encodes a transmembrane protein with similarity to the sterol desaturase family at the N-terminus and to the short-chain dehydrogenase/reductase family at the C-terminus. Mutant analyses indicate this protein is involved in cuticle membrane and wax biosynthesis.
Wa8730a008g004200	77.5639	2.92899	5.09e-10	7.82e-08	AT3G20395 AT1G12760 AT1G63170		RING/U-box superfamily protein Zinc finger, C3HC4 type (RING finger) family protein Zinc finger, C3HC4 type (RING finger) family protein
Wa8730a018g003450	421.568	2.92049	3.34e-26	2.63e-23	AT1G02390 AT4G01950	ATGPAT2, GPAT2 ATGPAT3, GPAT3	Encodes a member of a family of proteins with glycerol-3-phosphate acyltransferase activity. Encodes a member of a family of proteins with glycerol-3-phosphate acyltransferase activity.
Wa8730a006g003080	17.1499	2.88372	0.000732324	0.0371743	AT2G43820 AT1G05560 AT1G24100 AT4G14090	ATSAGT1, GT, SAGT1, SGT1, UGT74F2 UGT1, UGT75B1 UGT74B1	Induced by Salicylic acid, virus, fungus and bacteria.Involved in the tryptophan synthesis pathway. Independent of NPR1 for their induction by salicylic acid. UGT74F1 transfers UDP:glucose to salicylic acid (forming a glucoside (SAG) and a glucose ester (SGE)), benzoic acid, and athranilate in vitro. UGT74F2 shows a weak ability to catalyze the formation of the p-aminobenzoate-glucose ester in vi…
Wa8730a001g011770	53.9453	2.87557	6.95e-08	7.74e-06	AT3G45430 AT5G59260 AT2G29220 AT2G37710 AT3G53810 AT3G55550 AT3G08870 AT5G01550 AT4G34500 AT1G07460	LecRK-I.5 LecRK-II.1 LecRK-III.1 LecRK-IV.1, RLK LecRK-IV.2 LecRK-S.4 LecRK-VI.1 LECRKA4.2, LecRK-VI.3	Concanavalin A-like lectin protein kinase family protein Concanavalin A-like lectin protein kinase family protein Concanavalin A-like lectin protein kinase family protein Induced in response to Salicylic acid. Concanavalin A-like lectin protein kinase family protein Concanavalin A-like lectin protein kinase family protein Concanavalin A-like lectin protein kinase family protein Encodes LecRKA4.2,…
Wa8730a002g002000	25.2575	2.87466	0.000173533	0.0100673	AT4G00820 AT4G23060 AT5G62070	iqd17 IQD22 IQD23	IQ-domain 17 IQ-domain 22 IQ-domain 23
Wa8730a002g009950	559.546	2.84321	3.77e-31	3.65e-28	AT2G28630 AT5G04530	KCS12 KCS19	Encodes KCS12, a member of the 3-ketoacyl-CoA synthase family involved in the biosynthesis of VLCFA (very long chain fatty acids). Encodes KCS19, a member of the 3-ketoacyl-CoA synthase family involved in the biosynthesis of VLCFA (very long chain fatty acids).
Wa8730a007g007620	274.188	2.80511	5.35e-21	2.7e-18
Wa8730a005g003480	2441.36	2.79008	9.39e-34	1.69e-30	AT5G25610	ATRD22, RD22	responsive to dehydration 22 (RD22) mediated by ABA
Wa8730a006g004300	79.7478	2.79001	1.26e-07	1.35e-05	AT1G26870 AT2G02450 AT1G34180 AT5G39820	ANAC009, FEZ ANAC034, ANAC035, AtLOV1, LOV1, NAC035 NAC016, anac016 NAC094, anac094	NAC (No Apical Meristem) domain transcriptional regulator superfamily protein NAC domain containing protein 35 NAC domain containing protein 16 NAC domain containing protein 94
Wa8730a009g001970	141.734	2.78384	9.14e-14	2.26e-11	AT3G23600		alpha/beta-Hydrolases superfamily protein
Wa8730a003g004640	38.0285	2.77802	3.67e-06	0.000289351	AT3G52970 AT1G74550	CYP76G1 CYP98A9	member of CYP76G member of CYP98A
Wa8730a009g001170	54.4829	2.76196	3.06e-07	3.08e-05	AT3G55500 AT5G05290 AT5G39300 AT2G37640 AT2G28950 AT2G40610 AT5G02260	ATEXP16, ATEXPA16, ATHEXP, EXP16, EXPA16 ATEXP2, ATEXPA2, ATHEXP, EXP2, EXPA2 ATEXP25, ATEXPA25, ATHEXP, EXP25, EXPA25 ATEXP3, ATEXPA3, ATHEXP, EXP3 ATEXP6, ATEXPA6, ATHEXP, EXPA6 ATEXP8, ATEXPA8, ATHEXP, EXP8, EXPA8 ATEXP9, ATEXPA9, ATHEXP, EXP9, EXPA9	expansin-like protein. Naming convention from the Expansin Working Group (Kende et al, 2004. Plant Mol Bio). Involved in the formation of nematode-induced syncytia in roots of Arabidopsis thaliana. Encodes an expansin. Naming convention from the Expansin Working Group (Kende et al, 2004. Plant Mol Bio) member of Alpha-Expansin Gene Family. Naming convention from the Expansin Working Group (Kende …
Wa8730a005g005500	97.6567	2.73684	1.73e-09	2.44e-07	AT3G03690 AT1G53100 AT4G03340 AT3G15350 AT4G27480 AT1G03520	UNE7	Core-2/I-branching beta-1,6-N-acetylglucosaminyltransferase family protein Core-2/I-branching beta-1,6-N-acetylglucosaminyltransferase family protein Core-2/I-branching beta-1,6-N-acetylglucosaminyltransferase family protein Core-2/I-branching beta-1,6-N-acetylglucosaminyltransferase family protein Core-2/I-branching beta-1,6-N-acetylglucosaminyltransferase family protein Core-2/I-branching beta-…
Wa8730a007g001550	22.265	2.72935	0.000581012	0.030604	AT1G67830 AT5G55050	ATFXG1, FXG1	Encodes a protein with &#945 -fucosidase activity. The activity was assessed on 2'-fucosyl-lactitol. AtFXG1 was able to remove the t-fucosyl residues of XXFG xyloglucan oligosaccharides. GDSL-motif esterase/acyltransferase/lipase. Enzyme group with broad substrate specificity that may catalyze acyltransfer or hydrolase reactions with lipid and non-lipid substrates. The mRNA is cell-to-cell mobile.
Wa8730a009g002910	68.2944	2.72104	5.84e-09	7.82e-07	AT1G19190		alpha/beta-Hydrolases superfamily protein
Wa8730a006g001190	21.4258	2.70235	0.000661776	0.0341438	AT3G22120 AT4G15160 AT1G62500	CWLP	cell wall-plasma membrane linker protein homolog (CWLP) Bifunctional inhibitor/lipid-transfer protein/seed storage 2S albumin superfamily protein Bifunctional inhibitor/lipid-transfer protein/seed storage 2S albumin superfamily protein
Wa8730a016g002990	68.7362	2.6571	3.81e-07	3.8e-05	AT2G26710 AT5G10600	BAS1, CYP72B1, CYP734A1 CYP81K2	Encodes a member of the cytochrome p450 family that serves as a control point between multiple photoreceptor systems and brassinosteroid signal transduction. Involved in brassinolide metabolism. Mediates response to a variety of light signals including hypocotyl elongation and cotyledon expansion. member of CYP81K
Wa8730a009g005540	48.7832	2.65355	9.28e-07	8.65e-05	AT3G11430 AT5G06090	ATGPAT5, GPAT5 ATGPAT7, GPAT7	Encodes a protein with glycerol-3-phosphate acyltransferase activity, involved in the biosynthesis of suberin polyester. Encodes a protein with glycerol-3-phosphate acyltransferase activity.
Wa8730a017g000880	91.7037	2.63803	2.17e-08	2.62e-06	AT4G17100
Wa8730a006g000970	46.6556	2.63023	3.82e-06	0.00029695
Wa8730a007g007100	36.4997	2.62402	2.27e-05	0.00157347	AT1G22640 AT4G34990 AT4G38620 AT2G16720 AT1G35515	ATMYB3, MYB3 AtMYB32, MYB32 ATMYB4, MYB4 ATMYB7, ATY49, MYB7 HOS10, MYB8	MYB-type transcription factor (MYB3) that represses phenylpropanoid biosynthesis gene expression Member of the R2R3 factor gene family. Encodes a R2R3 MYB protein which is involved in the response to UV-B. It functions as a repressor of target gene expression. One of its target genes encodes cinnamate 4-hydroxylase mutants accumulate sinapate esters in their leaves. MYB4 binds to its own promoter…
Wa8730a012g002950	246.555	2.60743	1.79e-16	5.77e-14	AT3G07570 AT5G47530 AT3G25290 AT4G12980		Cytochrome b561/ferric reductase transmembrane with DOMON related domain Auxin-responsive family protein Auxin-responsive family protein Auxin-responsive family protein
Wa8730a008g000530	1265.9	2.56361	1.07e-21	5.84e-19
Wa8730a020g002790	32.1368	2.50084	0.000437246	0.0236244	AT1G67730 AT1G24470	ATKCR1, KCR1, YBR159 ATKCR2, KCR2	Encodes one of the two Arabidopsis homologues to YBR159w encoding a S. cerevisiae beta-ketoacyl reductase (KCR), which catalyzes the first reduction during VLCFA (very long chain fatty acids, >18 carbon) elongation: KCR1 (At1g67730), KCR2 (At1g24470). Complementation of the yeast ybr159Delta mutant demonstrated that the two KCR proteins are divergent and that only AtKCR1 can restore heterologous …
Wa8730a001g004990	107.421	2.49818	2.55e-08	3e-06
Wa8730a014g004960	321.971	2.49182	1.83e-20	8.84e-18	AT4G22690 AT4G12320 AT2G45580 AT3G61040 AT5G04630	CYP706A1 CYP706A6 CYP76C3 CYP76C7 CYP77A9	member of CYP706A member of CYP706A member of CYP76C encodes a protein with cytochrome P450 domain member of CYP77A
Wa8730a009g000230	45.5396	2.48757	3.32e-05	0.00226177	AT5G05730 AT2G29690 AT3G55870	AMT1, ASA1, JDL1, TRP5, WEI2 ASA2, ATHANSYNAB	ASA1 encodes the alpha subunit of anthranilate synthase, which catalyzes the rate-limiting step of tryptophan synthesis. ASA1 is induced by ethylene, and forms a link between ethylene signalling and auxin synthesis in roots. Encode a functional anthranilate synthase protein. Expressed at a constitutive basal level. Expression was not induced by wounding nor bacterial pathogen infiltration. Involv…
Wa8730a016g003730	166.639	2.47026	1.93e-12	3.98e-10	AT1G73360 AT3G61150 AT1G17920 AT5G17320	ATHDG11, AtEDT1, EDT1, HDG11 HD-GL2-1, HDG1 HDG12 HDG9	Encodes a homeobox-leucine zipper family protein belonging to the HD-ZIP IV family. It is involved in trichome branching. Encodes a homeobox-leucine zipper family protein belonging to the HD-ZIP IV family. Encodes a homeobox-leucine zipper family protein belonging to the HD-ZIP IV family. Together with HDG11, it is involved in trichome branching. Encodes a homeobox-leucine zipper family protein b…
Wa8730a008g002080	46.076	2.4651	3.35e-05	0.00226979	AT1G75170		Sec14p-like phosphatidylinositol transfer family protein
Wa8730a003g005510	65.4744	2.45927	5.41e-06	0.000407909
Wa8730a001g009050	44.8792	2.43903	4.32e-05	0.00283167
Wa8730a015g003310	96.4946	2.42929	2.98e-08	3.41e-06	AT5G10770		Eukaryotic aspartyl protease family protein
Wa8730a007g007600	247.183	2.41001	4.32e-13	9.53e-11	AT5G64700 AT3G18200 AT3G53210	UMAMIT21 UMAMIT4 UMAMIT6	nodulin MtN21-like transporter family protein nodulin MtN21-like transporter family protein nodulin MtN21-like transporter family protein
Wa8730a001g011170	326.364	2.39653	3.04e-12	6.16e-10	AT5G02540 AT2G37540 AT4G11410		NAD(P)-binding Rossmann-fold superfamily protein NAD(P)-binding Rossmann-fold superfamily protein NAD(P)-binding Rossmann-fold superfamily protein
Wa8730a002g005800	228.504	2.39096	2.93e-15	8.39e-13	AT1G76520 AT5G65980 AT2G17500 AT1G20925		Auxin efflux carrier family protein Auxin efflux carrier family protein Auxin efflux carrier family protein Auxin efflux carrier family protein
Wa8730a011g004730	130.697	2.35744	3.08e-06	0.000253554	AT5G57800	CER3, FLP1, WAX2, YRE	encodes a transmembrane protein with similarity to the sterol desaturase family at the N-terminus and to the short-chain dehydrogenase/reductase family at the C-terminus. Mutant analyses indicate this protein is involved in cuticle membrane and wax biosynthesis.
Wa8730a010g002810	18755.5	2.34774	7.7e-24	5.1e-21	AT1G23730 AT1G70410	ATBCA3, BCA3 ATBCA4, BCA4, CA4	beta carbonic anhydrase 3 Encodes a putative beta-carbonic anhydrase betaCA4. Together with betaCA1 (At3g01500) regulates CO2-controlled stomatal movements in guard cells.
Wa8730a002g006800	52.398	2.3171	3.42e-05	0.00229231	AT1G65480	FT, RSB8	FT, together with LFY, promotes flowering and is antagonistic with its homologous gene, TERMINAL FLOWER1 (TFL1). FT is expressed in leaves and is induced by long day treatment. Either the FT mRNA or protein is translocated to the shoot apex where it induces its own expression. Recent data suggests that FT protein acts as a long-range signal. FT is a target of CO and acts upstream of SOC1.
Wa8730a009g006420	190.122	2.31309	3.15e-10	5.15e-08	AT4G34880		Amidase family protein
Wa8730a001g012100	75.0787	2.28071	1.64e-05	0.00116515	AT1G07240 AT3G11340 AT5G05860 AT3G46660 AT5G59590 AT2G36970 AT3G55710 AT2G30150	UGT71C5 UGT76B1 UGT76C2 UGT76E12 UGT76E2	Encodes a UDP-glucosyltransferase that plays a role in abscisic acid (ABA) glucosylation from ABA to ABA-glucose ester and regulates ABA homeostasis, thereby influencing the ABA signal network. Encodes a glucosyltransferase that conjugates isoleucic acid and modulates plant defense and senescence. Encodes a cytokinin N-glucosyltransferase that is involved in cytokinin homeostasis and cytokinin re…
Wa8730a018g000570	57.6961	2.27837	1.85e-05	0.00130328	AT3G53720	ATCHX20, CHX20	member of Putative Na+/H+ antiporter family. Involved in the osmoregulation through K(+) fluxes and possibly pH modulation of an active endomembrane system in guard cells.
Wa8730a008g000650	527.581	2.26212	2.37e-10	3.93e-08
Wa8730a001g004980	1995.13	2.25887	1.42e-19	6.18e-17	AT2G27050 AT3G20770 AT5G21120	AtEIL1, EIL1 AtEIN3, EIN3 EIL2	ethylene-insensitive3-like1 (EIL1) Encodes EIN3 (ethylene-insensitive3), a nuclear transcription factor that initiates downstream transcriptional cascades for ethylene responses. ethylene-insensitive3-like2 (EIL2)
Wa8730a015g001170	134.218	2.25261	1.63e-07	1.7e-05	AT1G16060 AT1G79700	ADAP, WRI3 WRI4	Encodes ADAP, an AP2-domain protein that interacts with ARIA. ADAP is a positive regulator of the ABA response and is also involved in regulating seedling growth. WRI4 encodes an AP2/ERF-type transcriptional activator that specifically controls cuticular wax biosynthesis in Arabidopsis stems. It also functions to activate transcription of genes involved fatty acid biosynthesis during seed and flo…
Wa8730a009g001730	187.684	2.24455	3.22e-10	5.2e-08	AT2G41290 AT1G08470 AT3G57030 AT3G51440	SSL2 SSL3	Although this enzyme is predicted to encode a strictosidine synthase (SS), it lacks a conserved catalytic glutamate residue found in active SS enzymes and it is not expected to have SS activity. Although this enzyme is predicted to encode a strictosidine synthase (SS), it lacks a conserved catalytic glutamate residue found in active SS enzymes and it is not expected to have SS activity. Calcium-d…
Wa8730a013g000090	6243.91	2.22784	8.51e-19	3.25e-16	AT2G44990 AT4G19170	ATCCD7, CCD7, MAX3 CCD4, NCED4	More Axillary Branching carotenoid cleavage dioxygenases. chloroplast-targeted member of a family of enzymes similar to nine-cis-epoxycarotenoid dioxygenase
Wa8730a003g001960	48.04	2.19898	0.00021585	0.0124648
Wa8730a002g001580	157.102	2.1359	1.58e-06	0.000141275
Wa8730a013g005120	254.756	2.12464	6.24e-09	8.1e-07
Wa8730a005g001280	1770.03	2.08582	3.47e-16	1.09e-13	AT1G13150 AT4G39490 AT5G02900 AT4G32170 AT5G52320 AT2G21910 AT1G47620	CYP86C4 CYP96A10 CYP96A13 CYP96A2 CYP96A4 CYP96A5 CYP96A8	member of CYP86C member of CYP96A member of CYP96A member of CYP96A member of CYP96A member of CYP96A member of CYP96A
Wa8730a004g004930	174.835	2.08559	1.76e-06	0.000152421	AT2G20835
Wa8730a016g003960	178.366	2.08529	7.06e-06	0.000529238	AT5G06650 AT1G66140	GIS2 ZFP4	C2H2 and C2HC zinc fingers superfamily protein Encodes a zinc finger protein containing only a single zinc finger.
Wa8730a005g008030	198.463	2.08409	6.52e-09	8.38e-07	AT1G68840 AT1G25560	AtRAV2, EDF2, RAP2.8, RAV2, TEM2 AtTEM1, EDF1, TEM1	Rav2 is part of a complex that has been named `regulator of the (H+)-ATPase of the vacuolar and endosomal membranes' (RAVE) Encodes a member of the RAV transcription factor family that contains AP2 and B3 binding domains. Involved in the regulation of flowering under long days. Loss of function results in early flowering. Overexpression causes late flowering and repression of expression of FT. No…
Wa8730a004g002900	25500.2	2.07734	1.23e-16	4.06e-14	AT4G33010 AT2G26080	AtGLDP1, GLDP1 AtGLDP2, GLDP2	glycine decarboxylase P-protein 1 glycine decarboxylase P-protein 2
Wa8730a002g010170	281.863	2.062	9e-11	1.57e-08	AT3G23410 AT4G28570 AT1G03990 AT4G19380	ATFAO3, FAO3	Encodes a fatty alcohol oxidase. Long-chain fatty alcohol dehydrogenase family protein Long-chain fatty alcohol dehydrogenase family protein Long-chain fatty alcohol dehydrogenase family protein
Wa8730a004g008010	129.331	2.0573	3.46e-06	0.000275923	AT5G56860 AT5G26930	GATA21, GNC GATA23	Encodes a member of the GATA factor family of zinc finger transcription factors. Encodes a member of the GATA factor family of zinc finger transcription factors.
Wa8730a016g000380	102.998	2.05053	0.000104432	0.00647634	AT1G69640 AT1G14290	SBH1 SBH2	Encodes one of the two redundant sphingoid base hydroxylases (SBH). Involved in sphingolipid trihydroxy long-chain base (4-hydroxysphinganine) biosynthesis. Double mutants of SBHs were dwarfed and not able to progress from vegetative to reproductive growth. Encodes one of the two redundant sphingoid base hydroxylases (SBH). Involved in sphingolipid trihydroxy long-chain base (4-hydroxysphinganine…
Wa8730a003g003880	67.1328	2.0283	0.000550297	0.0291079
Wa8730a004g002220	84.4901	2.0253	0.000290699	0.0162525	AT5G55620 AT5G41761
Wa8730a004g002680	146.286	1.96592	1.75e-06	0.000152421
Wa8730a018g000010	541.635	1.95885	6.72e-11	1.23e-08	AT5G58770	AtcPT4, cPT4	Undecaprenyl pyrophosphate synthetase family protein
Wa8730a009g005730	1073.44	1.91393	2.26e-10	3.8e-08	AT3G63520 AT3G14440	ATCCD1, ATNCED1, CCD1, NCED1 ATNCED3, NCED3, SIS7, STO1	Encodes a protein with 9-<i>cis</i>-epoxycarotenoid dioxygenase activity. The enzyme was shown to act on a variety of carotenoid including &#946 -carotene, lutein, zeaxanthin, and all-<i>trans</i>-violaxanthin. When those compounds are used as substrates, the major reaction product detected is a C14 dialdehyde: 4,9-dimethyldodeca-2,4,6,8,10-pentaene-1,12-dial. The enzyme did not cleave as efficie…
Wa8730a007g002380	104.526	1.90231	0.000118408	0.00719162
Wa8730a014g005820	1211.93	1.90138	1.72e-06	0.000151787	AT3G10280 AT4G34510 AT1G04220 AT5G43760 AT1G19440 AT2G16280	KCS14 KCS17 KCS2 KCS20 KCS4 KCS9	Encodes KCS14, a member of the 3-ketoacyl-CoA synthase family involved in the biosynthesis of VLCFA (very long chain fatty acids). Encodes KCS17, a member of the 3-ketoacyl-CoA synthase family involved in the biosynthesis of VLCFA (very long chain fatty acids). Encodes KCS2, a member of the 3-ketoacyl-CoA synthase family involved in the biosynthesis of VLCFA (very long chain fatty acids). Encodes…
Wa8730a007g006900	2488.96	1.89123	8.48e-11	1.5e-08	AT4G34240 AT1G44170	ALDH3, ALDH3I1 ALDH3H1, ALDH4	Aldehyde dehydrogenase induced by ABA and dehydration Encodes a protein similar to the aldehyde dehydrogenase cp-ADH from C.plantagineum. Constitutively expressed at low levels.
Wa8730a003g002820	481.41	1.88631	8.54e-09	1.08e-06	AT3G29240		Protein of unknown function (DUF179)
Wa8730a008g005580	288.064	1.86458	1.18e-06	0.000108708	AT4G21380 AT1G11410 AT4G03230 AT1G61420 AT4G27300	ARK3, RK3	encodes a putative receptor-like serine/threonine protein kinases that is similar to Brassica self-incompatibility (S) locus. Expressed in root. Shoot expression limited to limited to the root-hypocotyl transition zone and at the base of lateral roots as well as in axillary buds, and pedicels. S-locus lectin protein kinase family protein S-locus lectin protein kinase family protein S-locus lectin…
Wa8730a012g000250	212.552	1.85958	0.000162353	0.00951104
Wa8730a009g001590	517.533	1.82981	1.26e-07	1.35e-05	AT3G55500 AT5G05290 AT5G39280 AT2G37640 AT2G28950 AT2G40610 AT5G02260	ATEXP16, ATEXPA16, ATHEXP, EXP16, EXPA16 ATEXP2, ATEXPA2, ATHEXP, EXP2, EXPA2 ATEXP23, ATEXPA23, ATHEXP, EXPA23 ATEXP3, ATEXPA3, ATHEXP, EXP3 ATEXP6, ATEXPA6, ATHEXP, EXPA6 ATEXP8, ATEXPA8, ATHEXP, EXP8, EXPA8 ATEXP9, ATEXPA9, ATHEXP, EXP9, EXPA9	expansin-like protein. Naming convention from the Expansin Working Group (Kende et al, 2004. Plant Mol Bio). Involved in the formation of nematode-induced syncytia in roots of Arabidopsis thaliana. Encodes an expansin. Naming convention from the Expansin Working Group (Kende et al, 2004. Plant Mol Bio) member of Alpha-Expansin Gene Family. Naming convention from the Expansin Working Group (Kende …
Wa8730a010g005520	1686.97	1.81597	2.17e-09	3.04e-07	AT1G76490 AT2G17370	AtHMGR1, HMG1, HMGR1, MAD3 HMG2, HMGR2	Encodes a 3-hydroxy-3-methylglutaryl coenzyme A reductase, which is involved in melavonate biosynthesis and performs the first committed step in isoprenoid biosynthesis. Expression is activated in dark in leaf tissue but not controlled by light in the root (confine Encodes a 3-hydroxy-3-methylglutaryl-CoA reductase (HMGR) that is involved in the synthesis of sterol and triterpenoid compounds.
Wa8730a011g003860	4579.7	1.79518	1.94e-07	1.99e-05	AT4G22260	IM, IM1, PTOX	Similar to mitochondrial alternative oxidase. im mutants have a variegated phenotype and fail to differentiate chloroplasts in the majority of their cells under high light intensity continuous illumination. The white tissues of immutans accumulate phytoene, a non-colored C40 carotenoid intermediate. This suggests that immutans controls, either directly or indirectly, the activity of phytoene desa…
Wa8730a004g007430	2326.93	1.79041	1.42e-12	2.98e-10
Wa8730a014g000720	206.49	1.78927	7.77e-06	0.00057526	AT1G75100 AT4G36520	JAC1	Contains a J-domain at the C-terminus which is similar to the J-domain of auxilin, a clathrin-uncoating factor in cow, yeast and worm. Arabidopsis contains 6 other proteins similar to auxilin. Expressed in leaves and stems, but not in roots. Localized in the cytoplasm. Required for the chloroplast accumulation response, but not for the avoidance response. No molecular function known. Chaperone Dn…
Wa8730a004g007170	1237.78	1.76212	2.5e-08	2.97e-06	AT1G06460	ACD31.2, ACD32.1	ACD32.1 encodes an alpha-crystallin domain containing protein with homology to small heat shock proteins.
Wa8730a009g003660	1723.91	1.75364	9.01e-07	8.47e-05	AT2G38530	LP2, LTP2, cdf3	Involved in lipid transfer between membranes. Belongs to a family of Lipid transfer proteins. Sequence similarity to other plant/Arabidopsis LPT genes but highest similarity to LPT1. Stress and pathogen-inducible motifs found in the upstream region. Expressed in flower, leaves and siliques but absent in roots. Predicted to be a member of PR-14 pathogenesis-related protein family with the followin…
Wa8730a007g005470	214.518	1.73568	2.02e-05	0.00140755
Wa8730a005g003910	172.152	1.71983	0.000347835	0.0192057	AT3G59140	ABCC10, ATMRP14, MRP14	member of MRP subfamily
Wa8730a012g004910	164.608	1.7152	0.000490224	0.0260398	AT5G10180 AT1G78000 AT4G08620 AT1G22150	AST68, SULTR2 1 SEL1, SULTR1 2 SULTR1 1 SULTR1 3	Encodes a low-affinity sulfate transporter expressed in the root cap and central cylinder, where it is induced by sulfur starvation. Expression in the shoot vascular system is not induced by sulfur starvation. Encodes a sulfate transporter that can restore sulfate uptake capacity of a yeast mutant lacking sulfate transporter genes. Encodes a sulfate transporter. Contains STAS domain. Expressed in…
Wa8730a009g004540	6413.49	1.70021	9.04e-08	9.98e-06
Wa8730a001g011890	1476.68	1.69091	7.1e-07	6.87e-05	AT5G59530 AT2G44800 AT5G43450		2-oxoglutarate (2OG) and Fe(II)-dependent oxygenase superfamily protein 2-oxoglutarate (2OG) and Fe(II)-dependent oxygenase superfamily protein encodes a protein whose sequence is similar to ACC oxidase
Wa8730a007g007570	426.777	1.68987	3.36e-06	0.00026955	AT1G43670	AtcFBP, FBP, FINS1	Encodes a fructose-1,6-bisphosphatase. This enzyme, in addition to catalyzing the formation of fructose-6-phosphate for sucrose biosynthesis, appears to play a role in fructose-mediated signaling that is independent of its enzymatic activity. atcfbp-1/fins1 mutants have reduced photosynthetic rates, elevated levels of starch and reduced levels of sucrose during the day. Although the protein is ex…
Wa8730a010g004920	325.061	1.66729	0.000270988	0.0152981	AT5G47760	ATPGLP2, ATPK5, PGLP2	serine/threonine protein kinase
Wa8730a003g002300	879.687	1.64405	6.54e-05	0.00417639	AT5G67360 AT4G30020	ARA12	Encodes a subtilisin-like serine protease essential for mucilage release from seed coats. PA-domain containing subtilase family protein
Wa8730a001g003320	541.515	1.6293	0.000162433	0.00951104	AT5G53970 AT4G28420	TAT7	encodes tyrosine aminotransferase which is strongly induced upon aging and coronatine treatment Tyrosine transaminase family protein
Wa8730a010g000680	198.908	1.60625	0.000908944	0.0445241	AT5G44700 AT4G26050 AT5G62710 AT5G25930 AT2G45340 AT4G28650 AT1G51820 AT1G72540 AT3G24240	EDA23, GSO2 PIRL8	Encodes GASSHO2 (GSO2), a putative leucine-rich repeat transmembrane-type receptor kinase. GSO2 and a homolog GSO1 (At4g20140) are required for the formation of a normal epidermal surface during embryogenesis. Encodes PIRL8, a member of the Plant Intracellular Ras-group-related LRRs (Leucine rich repeat proteins). PIRLs are a distinct, plant-specific class of intracellular LRRs that likely mediat…
Wa8730a011g000050	1175.48	1.56782	0.000226662	0.0130294	AT5G35970		P-loop containing nucleoside triphosphate hydrolases superfamily protein
Wa8730a019g002640	790.798	1.5507	2.34e-05	0.00160741	AT5G19140	AILP1, ATAILP1	Aluminium induced protein with YGL and LRDR motifs
Wa8730a003g005260	3938.97	1.54487	2.17e-06	0.000184797	AT1G68530 AT1G25450 AT2G26640 AT4G34510 AT5G43760 AT1G19440	CER6, CUT1, G2, KCS6, POP1 CER60, KCS5 KCS11 KCS17 KCS20 KCS4	Encodes KCS6, a member of the 3-ketoacyl-CoA synthase family involved in the biosynthesis of VLCFA (very long chain fatty acids). Encodes KCS5, a member of the 3-ketoacyl-CoA synthase family involved in the biosynthesis of VLCFA (very long chain fatty acids). Encodes KCS11, a member of the 3-ketoacyl-CoA synthase family involved in the biosynthesis of VLCFA (very long chain fatty acids). Encodes …
Wa8730a001g005760	770.174	1.52844	0.000158408	0.00936242	AT5G05200		Protein kinase superfamily protein
Wa8730a005g007470	1212.57	1.49296	0.000607579	0.0314766	AT1G66330		senescence-associated family protein
Wa8730a003g000120	19186.9	1.49245	3.21e-05	0.00219918	AT4G37930	SHM1, SHMT1, STM	Encodes a protein with mitochondrial serine hydroxymethyltransferase activity, which functions in the photorespiratory pathway, catalyzes the conversion of serine and tetrahydrofolate to glycine and 5,10-methylene tetrahydrofolate. Involved in controlling cell damage caused by abiotic stress, such as high light and salt and the hypersensitive defense response of plants.
Wa8730a017g004560	1808.78	1.48674	9.3e-05	0.00582629	AT1G18350 AT1G68830	ATMKK7, BUD1, MKK7 STN7	MAP kinase kinase7. Member of plant mitogen-activated protein kinase kinase group D. Negative regulator of polar auxin transport. Overexpression leads to activation of basal and systemic acquired resistance. STN7 protein kinase required for state transitions, phosphorylation of the major antenna complex (LHCII) between PSII and PSI, and light adaptation
Wa8730a010g004870	687.133	1.48635	0.000811687	0.0408733	AT5G48230	AACT2, ACAT2, EMB1276	Encodes an acetoacetyl-CoA thiolase that generates the bulk of the acetoacetyl-CoA precursor needed for the cytosolic localized, mevalonate-derived isoprenoids biosynthetic pathway. Loss-of-function mutants are embryo lethal.
Wa8730a008g005940	870.033	1.48105	0.000970444	0.0471696
Wa8730a014g005090	3710.71	1.46703	7.43e-05	0.00472455	AT1G12090 AT4G00165 AT4G22460 AT1G62510 AT2G45180 AT4G12510	ELP	extensin-like protein (ELP) Bifunctional inhibitor/lipid-transfer protein/seed storage 2S albumin superfamily protein Bifunctional inhibitor/lipid-transfer protein/seed storage 2S albumin superfamily protein Bifunctional inhibitor/lipid-transfer protein/seed storage 2S albumin superfamily protein Bifunctional inhibitor/lipid-transfer protein/seed storage 2S albumin superfamily protein Encodes a m…
Wa8730a002g008060	1074.38	1.4599	0.000597432	0.031164	AT2G36690		2-oxoglutarate (2OG) and Fe(II)-dependent oxygenase superfamily protein
Wa8730a010g004010	2087.57	1.4327	0.000900245	0.0442703
Wa8730a002g010670	2578.49	1.40083	0.000352449	0.0193754	AT5G60600	CLB4, CSB3, GCPE, HDS, ISPG	Encodes a chloroplast-localized hydroxy-2-methyl-2-(E)-butenyl 4-diphosphate (HMBPP) synthase (HDS), catalyzes the formation of HMBPP from 2-C-methyl-D-erythrytol 2,4-cyclodiphosphate (MEcPP). The HDS enzyme controls the penultimate steps of the biosynthesis of IPP and dimethylallyl diphosphate (DMAPP) via the MEP pathway and may serve as a metabolic control point for SA-mediated disease resistan…
Wa8730a006g002780	2096.73	-1.47436	0.000407272	0.0222919
Wa8730a018g002160	5388.73	-1.51168	0.000232249	0.0132899
Wa8730a001g011180	847.786	-1.54198	0.000596094	0.031164	AT5G02540 AT2G37540 AT4G11410		NAD(P)-binding Rossmann-fold superfamily protein NAD(P)-binding Rossmann-fold superfamily protein NAD(P)-binding Rossmann-fold superfamily protein
Wa8730a004g008240	952.836	-1.59276	3.3e-06	0.000266542
Wa8730a002g001530	3202.26	-1.66718	1.58e-06	0.000141275	AT4G24130		Protein of unknown function, DUF538
Wa8730a014g003180	202.561	-1.69249	0.000599069	0.031164
Wa8730a004g008230	637.93	-1.70231	4.02e-06	0.000310456
Wa8730a007g002920	159.747	-1.72083	0.000683169	0.0350223	AT5G63530 AT5G50740 AT3G02960	ATFP3, FP3	Farnesylated protein that binds metals. Heavy metal transport/detoxification superfamily protein Heavy metal transport/detoxification superfamily protein
Wa8730a014g000550	263.911	-1.74279	5.63e-05	0.00361862
Wa8730a004g002340	244.241	-1.75526	0.000687147	0.0350223	AT4G16745 AT5G11610 AT4G32790 AT5G25820 AT5G19670		Exostosin family protein Exostosin family protein Exostosin family protein Exostosin family protein Exostosin family protein
Wa8730a016g003800	115.658	-1.78124	0.00101778	0.0490911	AT1G68130 AT2G01940 AT1G25250 AT1G14580	AtIDD14, IDD14, IDD14alpha, IDD14beta ATIDD15, SGR5 AtIDD16, IDD16	Encodes the shorter of two splice variants of a transcription factor, the variant that lacks a functional DNA binding domain and acts as a competitive inhibitor in regulating starch metabolism. The two proteins form both homo- and heterodimers. Heterodimers have reduced binding ability to the promoter of QQS, a gene that regulates starch accumulation. May be involved in an early event in shoot gr…
Wa8730a017g002190	653.266	-1.78422	4.34e-05	0.00283167	AT2G17120	CL-1, LYM2, LYP1	Induction of chitin-responsive genes by chitin treatment is not blocked in the mutant. It contains a C-terminal GPI anchor signal and is an ortholog of OsCEBiP.
Wa8730a002g001360	152.717	-1.79293	0.000291768	0.0162525	AT4G00940 AT2G46590 AT4G24060 AT3G52440 AT1G64620	AtDOF4.1, DOF4.1, ITD1 DAG2	Dof-type zinc finger DNA-binding family protein encodes a protein containing Dof zinc finger motifs. expression is limited to vascular system of the mother plant. recessive mutation is inherited as maternal-effect and expression is not detected in the embryo. mutants are defective in seed germination. mutants are more dependent on light and cold treatment and less sensitive to gibberellin during …
Wa8730a002g001140	235.581	-1.82387	0.000287509	0.0161583
Wa8730a007g007410	188.952	-1.82569	1.93e-05	0.00135199	AT2G27230	LHW	Encodes a nuclear-localized transcriptional activator with weak sequence similarity to basic helix-loop-helix(bHLH)-domain proteins. It promotes the production of stele cells in root meristems and is required to establish and maintain the normal vascular cell number and pattern in primary and lateral roots.
Wa8730a011g005690	99.6564	-1.82719	0.00092367	0.0450701
Wa8730a010g001830	239.731	-1.84826	5.1e-05	0.00330788	AT4G27970 AT5G24030	SLAH2 SLAH3	Encodes a protein with ten predicted transmembrane helices. The SLAH2 protein has similarity to the SLAC1 protein involved in ion homeostasis in guard cells. But, it is not expressed in guard cells and cannot complement a slac1-2 mutant suggesting that it performs a different function. SLAH2:GFP localizes to the plasma membrane. Encodes a protein with ten predicted transmembrane helices. The SLAH…
Wa8730a003g004210	295.705	-1.85739	3.16e-06	0.000258512
Wa8730a003g002590	153.845	-1.86217	7.57e-05	0.00478871
Wa8730a011g003660	571.084	-1.87397	1.58e-08	1.93e-06	AT5G61250 AT5G07830	AtGUS1, GUS1 AtGUS2, GUS2	Belongs to the plant glycoside hydrolase family 79. Encodes a protein with several posttranslational modification sites including O-&#946 -GlcNAc attachment sites and serine-, threonine- and tyrosine-phosphorylation sites, suggesting that this protein is extensively modified posttranslationally. The protein is predicted (WoLF PSORT program) to be secreted. Belongs to the plant glycoside hydrolase…
Wa8730a007g008250	122.444	-1.87522	0.000293059	0.0162525	AT1G34790 AT1G08290	TT1, WIP1 WIP3	Encodes a zinc finger protein involved in photomorphogenesis, flavonoid biosynthesis, flower and seed development. WIP domain protein 3
Wa8730a014g002860	198.03	-1.87829	3.77e-06	0.000294827	AT2G45190 AT1G08465 AT2G26580	AFO, FIL, YAB1 YAB2 YAB5	Encodes a member of the YABBY family of transcriptional regulators that is involved in abaxial cell type specification in leaves and fruits. YAB1 acts in a non-cell autonomous fashion within the meristem to affect phyllotactic patterning. The non-autonomous effect on the central region of the meristem is mediated through the activity if Lateral Suppressor (LAS). Member of the YABBY family of Arab…
Wa8730a009g004350	167.844	-1.88731	3.44e-05	0.00229445	AT1G02520 AT3G62150 AT4G01820 AT2G47000	ABCB11, MDR8, PGP11 ABCB21, PGP21 ABCB3, MDR3, PGP3 ABCB4, ATPGP4, AtABCB4, MDR4, PGP4	Encodes an ATP-binding cassette (ABC) transporter. Expressed in the vascular tissue of primary stem. The mRNA is cell-to-cell mobile. Encodes a facultative transporter controlling auxin concentrations in plant cells. member of MDR subfamily Multidrug resistance P-glycoprotein (MDR/PGP) subfamily of ABC transporters. Functions in the basipetal redirection of auxin from the root tip. Exhibits apola…
Wa8730a011g004740	164.593	-1.90572	1.08e-05	0.000789503	AT1G55760		BTB/POZ domain-containing protein
Wa8730a015g001570	757.396	-1.94184	1.86e-10	3.17e-08	AT5G48540		receptor-like protein kinase-related family protein
Wa8730a020g000340	10223.7	-1.94809	1.39e-07	1.47e-05
Wa8730a003g003480	456.537	-1.95896	4.05e-07	4.02e-05	AT5G38970 AT3G30180 AT5G36110	ATBR6OX, BR6OX, BR6OX1, CYP85A1 BR6OX2, CYP85A2 CYP716A1	Encodes a polypeptide involved in the C-6 oxidation of brassinosteroids. Heterologous expression of the protein in yeast conferred the ability to catalyze multiple reactions in which the C-6 position of 6-deoxocastasterone, 6-deoxotyphasterol, 3-dehydro-6-deoxoteasterone and 6-deoxoteasterone are oxidized. Encodes a cytochrome p450 enzyme that catalyzes the last reaction in the production of bras…
Wa8730a005g000850	79.5312	-1.96329	0.000427709	0.0232088	AT4G13260 AT5G11320 AT5G25620 AT5G43890 AT4G32540 AT4G28720 AT1G04180	AtYUC2, YUC2 AtYUC4, YUC4 AtYUC6, YUC6 SUPER1, YUC5 YUC, YUC1 YUC8 YUC9	Encodes YUC2. Catalyzes conversion of IPA (indole-3-pyruvic acid) to IAA (indole-3-acetic acid) in auxin biosynthesis pathway. Belongs to the YUC gene family. Encodes a predicted flavin monooxygenase YUC4 involved in auxin biosynthesis and plant development. Flavin-binding monooxygenase family protein Encodes a YUCCA-like putative flavin monooxygenase, the activation tagging mutant has increased …
Wa8730a002g001520	2391.42	-1.97704	7.49e-07	7.2e-05	AT4G24130		Protein of unknown function, DUF538
Wa8730a008g005590	188.468	-1.9986	3.68e-06	0.000289351	AT4G21380 AT1G11410 AT4G03230 AT1G61420 AT4G27300	ARK3, RK3	encodes a putative receptor-like serine/threonine protein kinases that is similar to Brassica self-incompatibility (S) locus. Expressed in root. Shoot expression limited to limited to the root-hypocotyl transition zone and at the base of lateral roots as well as in axillary buds, and pedicels. S-locus lectin protein kinase family protein S-locus lectin protein kinase family protein S-locus lectin…
Wa8730a003g000980	439.101	-2.00185	4.59e-10	7.14e-08	AT2G22860 AT3G49780 AT4G37720	ATPSK2, PSK2 ATPSK3, ATPSK4, PSK4 ATPSK6, PSK6	Phytosulfokine 2 precursor, coding for a unique plant peptide growth factor. Phytosulfokine 3 precursor, coding for a unique plant peptide growth factor. Plants overexpressing this gene (under a 35S promoter), develop normal cotyledons and hypocotyls but their growth, in particular that of their roots, was faster than that of wildtype. Probable phytosulfokines 6 precursor, coding for a unique pla…
Wa8730a001g002220	465.242	-2.00734	4.99e-06	0.000378279	AT4G30880		Bifunctional inhibitor/lipid-transfer protein/seed storage 2S albumin superfamily protein
Wa8730a002g004460	658.894	-2.01349	1.9e-06	0.000163798	AT4G38580 AT1G71050 AT4G35060 AT5G66110	ATFP6, FP6, HIPP26 HIPP20 HIPP25 HIPP27	putative farnesylated protein (At4g38580) mRNA, complete Heavy metal transport/detoxification superfamily protein Heavy metal transport/detoxification superfamily protein Heavy metal transport/detoxification superfamily protein
Wa8730a001g011080	69.0449	-2.02018	0.000898309	0.0442703	AT5G59820 AT2G37430 AT2G28710 AT3G53600 AT3G46070	AtZAT12, RHL41, ZAT12 ZAT11	Encodes a zinc finger protein involved in high light and cold acclimation. Overexpression of this putative transcription factor increases the expression level of 9 cold-responsive genes and represses the expression level of 15 cold-responsive genes, including CBF genes. Also, lines overexpressing this gene exhibits a small but reproducible increase in freeze tolerance. Because of the repression o…
Wa8730a004g008200	2378.85	-2.03275	7.32e-10	1.08e-07	AT5G51570 AT1G69840		SPFH/Band 7/PHB domain-containing membrane-associated protein family SPFH/Band 7/PHB domain-containing membrane-associated protein family
Wa8730a014g002180	457.952	-2.03545	2.78e-08	3.24e-06
Wa8730a017g004010	91.3596	-2.04938	0.000123738	0.00745332	AT1G69310 AT1G29860 AT5G46350	ATWRKY57, WRKY57 ATWRKY71, WRKY71 ATWRKY8, WRKY8	member of WRKY Transcription Factor Group II-c member of WRKY Transcription Factor Group II-c member of WRKY Transcription Factor Group II-c
Wa8730a014g002160	123.271	-2.09791	5.48e-05	0.00353485
Wa8730a001g001560	276.783	-2.1068	8.25e-07	7.81e-05	AT5G49760 AT1G69730		Leucine-rich repeat protein kinase family protein Wall-associated kinase family protein
Wa8730a015g003530	461.012	-2.10683	5.07e-07	4.99e-05	AT3G02740 AT1G25510 AT5G10770		Eukaryotic aspartyl protease family protein Eukaryotic aspartyl protease family protein Eukaryotic aspartyl protease family protein
Wa8730a004g007790	141.326	-2.11271	1.29e-05	0.000927356	AT1G79680 AT3G16030 AT1G70530 AT2G19190 AT1G06840 AT5G25930 AT1G51805 AT1G49100 AT1G25320 AT4G29990	ATWAKL10, WAKL10 CES101, RFO3 CRK3 FRK1	Encodes a twin-domain, kinase-GC signaling molecule that may function in biotic stress responses that is critically dependent on the second messenger cGMP. lectin protein kinase family protein Encodes a cysteine-rich receptor-like protein kinase. Receptor-like protein kinase. Involved in early defense signaling. Leucine-rich repeat protein kinase family protein Protein kinase family protein with …
Wa8730a006g003620	281.251	-2.11327	1.15e-08	1.43e-06	AT3G48780	ATSPT1, SPT1	Encodes one of the two LCB2 subunits (LCB2a and LCB2b) of serine palmitoyltransferase, an enzyme involved in sphingolipid biosynthesis. LCB2a and LCB2b are functional redundant. Double mutants are gametophytic lethal.
Wa8730a014g005400	209.315	-2.13394	3.62e-09	4.95e-07	AT4G38390 AT1G76270 AT4G16650 AT1G20550 AT1G14970 AT1G11990	RHS17	root hair specific 17 O-fucosyltransferase family protein O-fucosyltransferase family protein O-fucosyltransferase family protein O-fucosyltransferase family protein O-fucosyltransferase family protein
Wa8730a011g000780	425.949	-2.13914	3.41e-08	3.86e-06
Wa8730a003g007970	75.6102	-2.14016	0.000169894	0.00990184	AT3G22820 AT4G14723	CLL1, EPFL5 CLL2, EPFL4	allergen-related
Wa8730a010g000520	479.642	-2.14087	7.87e-07	7.51e-05	AT1G04220 AT5G43760	KCS2 KCS20	Encodes KCS2, a member of the 3-ketoacyl-CoA synthase family involved in the biosynthesis of VLCFA (very long chain fatty acids). Encodes KCS20, a member of the 3-ketoacyl-CoA synthase family involved in the biosynthesis of VLCFA (very long chain fatty acids).
Wa8730a013g001200	103.596	-2.1706	1.04e-05	0.000768909	AT4G23340		2-oxoglutarate (2OG) and Fe(II)-dependent oxygenase superfamily protein
Wa8730a005g003040	234.972	-2.17519	3.32e-10	5.3e-08	AT4G32790 AT5G11610 AT5G25820 AT5G19670		Exostosin family protein Exostosin family protein Exostosin family protein Exostosin family protein
Wa8730a001g001570	277.878	-2.18767	6.82e-10	1.02e-07	AT5G49760 AT1G69730 AT4G31100		Leucine-rich repeat protein kinase family protein Wall-associated kinase family protein wall-associated kinase, putative
Wa8730a015g000380	311.883	-2.1887	1.25e-08	1.54e-06	AT4G30110 AT2G19110	ATHMA2, HMA2 ATHMA4, HMA4	encodes a protein similar to Zn-ATPase, a P1B-type ATPases transport zinc Encodes a protein with similarity to Zn ATPase. Can rescue Zn deficiency in yeast and Cd resistance, suggesting a role in Zn and Cd transport.
Wa8730a015g000780	268.397	-2.21293	2.41e-07	2.45e-05	AT2G19330 AT4G29880 AT4G26050	PIRL6 PIRL7 PIRL8	Encodes PIRL6, a member of the Plant Intracellular Ras-group-related LRRs (Leucine rich repeat proteins). PIRLs are a distinct, plant-specific class of intracellular LRRs that likely mediate protein interactions, possibly in the context of signal transduction. Encodes PIRL7, a member of the Plant Intracellular Ras-group-related LRRs (Leucine rich repeat proteins). PIRLs are a distinct, plant-spec…
Wa8730a002g009690	768.035	-2.23776	4.33e-10	6.81e-08	AT3G23410 AT4G28570 AT1G03990 AT4G19380	ATFAO3, FAO3	Encodes a fatty alcohol oxidase. Long-chain fatty alcohol dehydrogenase family protein Long-chain fatty alcohol dehydrogenase family protein Long-chain fatty alcohol dehydrogenase family protein
Wa8730a010g000690	245.374	-2.25472	4.96e-11	9.33e-09	AT4G31800 AT4G22070	ATWRKY18, WRKY18 ATWRKY31, WRKY31	Pathogen-induced transcription factor. Binds W-box sequences in vitro. Forms protein complexes with itself and with WRKY40 and WRKY60. Constitutive expression of WRKY18 enhanced resistance to P. syringae, but its coexpression with WRKY40 or WRKY60 made plants more susceptible to both P. syringae and B. cinerea. WRKY18, WRKY40, and WRKY60 have partially redundant roles in response to the hemibiotr…
Wa8730a013g004170	232.25	-2.26406	2.9e-08	3.35e-06	AT1G17860		Kunitz family trypsin and protease inhibitor protein
Wa8730a016g004790	56.8846	-2.26671	0.000270758	0.0152981	AT1G02550		Plant invertase/pectin methylesterase inhibitor superfamily protein
Wa8730a005g006840	73.207	-2.28841	1.24e-05	0.000896776	AT1G70510 AT1G23380	ATK1, KNAT2 KNAT6, KNAT6L, KNAT6S	A member of class I knotted1-like homeobox gene family (together with KNAT1). Similar to the knotted1 (kn1) homeobox gene of maize. KNAT2 acts synergistically with cytokinins and antagonistically with ethylene based on ectopic expression studies in different mutant backgrounds and hormone treatments. In addition, KNAT2 is negatively regulated by AS and YABBY genes. KNAT2 is strongly expressed in …
Wa8730a001g000280	517.871	-2.28978	1.25e-09	1.8e-07	AT3G12500 AT4G01700 AT1G02360	ATHCHIB, B-CHI, CHI-B, HCHIB, PR-3, PR3	encodes a basic chitinase involved in ethylene/jasmonic acid mediated signalling pathway during systemic acquired resistance based on expression analyses. Chitinase family protein Chitinase family protein
Wa8730a012g004680	59.0375	-2.28984	0.00048347	0.0257898	AT4G40060 AT5G65310 AT2G22430	ATHB-16, ATHB16, HB16 ATHB-5, ATHB5, HB5 ATHB6, HB6	Encodes a homeodomain leucine zipper class I (HD-Zip I) protein. Encodes a class I HDZip (homeodomain-leucine zipper) protein that is a positive regulator of ABA-responsiveness, mediating the inhibitory effect of ABA on growth during seedling establishment. Encodes a homeodomain leucine zipper class I (HD-Zip I) protein that is a target of the protein phosphatase ABI1 and regulates hormone respon…
Wa8730a004g003310	39.6314	-2.2954	0.00102385	0.0491958
Wa8730a013g005790	44.5247	-2.31207	0.000444348	0.0239055	AT4G14365 AT3G23280	XBAT34 XBAT35	XB3 ortholog 4 in Arabidopsis thaliana Encodes a ubiquitin ligase that is a novel player in ethylene signaling involved in negatively regulating apical hook curvature, with alternative splicing controlling dual targeting to the nuclear and cytoplasmic compartments.
Wa8730a011g001680	62.5312	-2.33702	0.000139133	0.00830118	AT3G60870 AT2G35270 AT4G17800 AT1G76500	AHL18 AHL21, GIK AHL23 AHL29, SOB3	Encodes an AT hook domain containing protein that, when overexpressed, delays flowering. Direct target of AGAMOUS. Regulates patterning and differentiation of reproductive organs. Predicted AT-hook DNA-binding family protein Encodes an AT hook domain containing protein. Identified in a screen of activation tagged lines that suppress the long-hypocotyl phenotype of a weak phyB allele. Affects cell…
Wa8730a011g002630	244.235	-2.3724	1.16e-10	2e-08
Wa8730a005g002770	63.5066	-2.39601	1.63e-05	0.00116515	AT2G36890	ATMYB38, BIT1, MYB38, RAX2	Putative homolog of the Blind gene in tomato. Together with RAX1 and RAX3 belong to the class R2R3 MYB genes encoded by the Myb-like transcription factor MYB38, regulates axillary meristem formation.
Wa8730a003g000450	49.924	-2.40133	8.41e-05	0.00529233	AT5G42630	ATS, KAN4	Encodes a member of the KANADI family of putative transcription factors. Involved in integument formation during ovule development and expressed at the boundary between the inner and outer integuments. It is essential for directing laminar growth of the inner integument.Along with KAN1 and KAN2, KAN4 is involved in proper localization of PIN1 in early embryogenesis.
Wa8730a002g000140	561.728	-2.40303	2.56e-13	5.75e-11
Wa8730a016g000390	38.3609	-2.40724	0.000896724	0.0442703
Wa8730a001g008820	138.462	-2.41003	2.43e-06	0.000202529	AT2G04160 AT2G05920 AT5G59190	AIR3	isolated from differential screening of a cDNA library from auxin-treated root culture. encodes a protein similar to subtilisin-like serine protease which is believed to be active outside the plant cell. Subtilase family protein subtilase family protein
Wa8730a015g002880	101.296	-2.4379	5.3e-08	5.96e-06	AT1G68640 AT5G06839	PAN, TGA8 TGA10, bZIP65	Encodes bZIP-transcription factor. Mutant plants have extra floral organs. PAN is essential for AG activation in early flowers of short-day-grown plants. bZIP transcription factor family protein
Wa8730a012g003520	32.3329	-2.45628	0.000998317	0.0483377	AT5G20830 AT5G49190 AT3G43190 AT5G37180 AT1G73370	ASUS1, SUS1, atsus1 ATSUS2, SSA, SUS2 ATSUS4, SUS4 ATSUS5, SUS5 ATSUS6, SUS6	Encodes a protein with sucrose synthase activity (SUS1). Encodes a sucrose synthase (SUS2). The activity of the enzyme could not be assayed as proved to be insoluble (PMID 17257168). However, analyses of an sus2 mutant revealed a deficiency in sucrose synthase activity 12 and 15 days after flowering. There are some reports that SUS2 transcript levels are increased in leaves specifically by O(2) d…
Wa8730a016g002310	223.809	-2.45911	1.05e-11	2.06e-09	AT1G18860 AT1G68150	ATWRKY61, WRKY61 ATWRKY9, WRKY9	member of WRKY Transcription Factor Group II-b member of WRKY Transcription Factor Group II-b
Wa8730a005g006380	38.8122	-2.50846	0.000239908	0.0136661	AT1G65620 AT3G03760 AT3G27650 AT5G63090	AS2 LBD20 LBD25 LOB	Required for formation of a symmetric flat leaf lamina, encodes a member of a family of proteins characterized by cysteine repeats and a leucine zipper involved in KNOX gene regulation. Acts together with ASL1 in proximal-distal symmetry determination. Forms a complex with AS1 that binds to the BP promoter and leads to silencing of BP. LOB domain-containing protein 20 LOB domain-containing protei…
Wa8730a009g003240	223.879	-2.51905	7.19e-14	1.81e-11	AT3G03660 AT5G17810	WOX11 WOX12	Encodes a WUSCHEL-related homeobox gene family member with 65 amino acids in its homeodomain. Proteins in this family contain a sequence of eight residues (TLPLFPMH) downstream of the homeodomain called the WUS box. Encodes a WUSCHEL-related homeobox gene family member with 65 amino acids in its homeodomain. Proteins in this family contain a sequence of eight residues (TLPLFPMH) downstream of the…
Wa8730a001g010580	1894.34	-2.52162	3.03e-06	0.000250912	AT3G09590 AT4G33720 AT4G31470		CAP (Cysteine-rich secretory proteins, Antigen 5, and Pathogenesis-related 1 protein) superfamily protein CAP (Cysteine-rich secretory proteins, Antigen 5, and Pathogenesis-related 1 protein) superfamily protein CAP (Cysteine-rich secretory proteins, Antigen 5, and Pathogenesis-related 1 protein) superfamily protein
Wa8730a001g009720	544.258	-2.52374	0.000738624	0.0373435
Wa8730a005g003250	1039.12	-2.55218	1.72e-18	6.35e-16	AT1G73190 AT3G16240 AT4G01470 AT2G36830 AT2G25810 AT1G52180	ALPHA-TIP, TIP3 1 AQP1, ATTIP2 1, DELTA-TIP, DELTA-TIP1, TIP2 1 ATTIP1.3, GAMMA-TIP3, TIP1 3 GAMMA-TIP, GAMMA-TIP1, TIP1 1 TIP4 1	Moves to the Protein Storage Vacuole in a Golgi independent manner Delta tonoplast intrinsic protein, functions as a water channel and ammonium (NH3) transporter. Highly expressed in flower, shoot, and stem. Expression shows diurnal regulation and is induced by ammonium (NH3). Protein localized to vacuolar membrane. Encodes AtTIP1 3, functions as water and urea channels in pollen. Encodes a tonop…
Wa8730a004g003260	181.492	-2.56409	8.96e-12	1.79e-09	AT3G24420		alpha/beta-Hydrolases superfamily protein
Wa8730a005g001430	838.649	-2.60337	5.21e-18	1.81e-15	AT1G13140 AT4G39490 AT5G02900 AT4G32170 AT5G52320 AT2G21910 AT1G47620	CYP86C3 CYP96A10 CYP96A13 CYP96A2 CYP96A4 CYP96A5 CYP96A8	member of CYP86C member of CYP96A member of CYP96A member of CYP96A member of CYP96A member of CYP96A member of CYP96A
Wa8730a012g004850	188.082	-2.60911	6.05e-11	1.12e-08	AT5G27100	ATGLR2.1, GLR2.1	member of Putative ligand-gated ion channel subunit family
Wa8730a012g001040	62.315	-2.61049	1.23e-06	0.000112263
Wa8730a013g004680	405.336	-2.61503	5.14e-20	2.4e-17	AT5G43360 AT2G32830 AT3G54700	ATPT4, PHT1 3, PHT3 PHT1 5, PHT5 PHT1 7	Encodes Pht1 3, a member of the Pht1 family of phosphate transporters which include: Pht1 1/At5g43350, Pht1 2/At5g43370, Pht1 3/At5g43360, Pht1 4/At2g38940, Pht1 5/At2g32830, Pht1 6/At5g43340, Pht1 7/At3g54700, Pht1 8/At1g20860, Pht1 9/At1g76430 (Plant Journal 2002, 31:341). Encodes Pht1 5, a member of the Pht1 family of phosphate transporters which include: Pht1 1/At5g43350, Pht1 2/At5g43370, Ph…
Wa8730a014g004240	129.641	-2.61673	7.68e-11	1.38e-08	AT1G75500	UMAMIT5, WAT1	An Arabidopsis thaliana homolog of Medicago truncatula NODULIN21 (MtN21). The gene encodes a plant-specific, predicted integral membrane protein and is a member of the Plant-Drug/Metabolite Exporter (P-DME) family (Transporter Classification number: TC 2.A.7.3).
Wa8730a010g004730	30.8648	-2.64327	0.000415614	0.0226501	AT4G09600 AT1G10588	GASA3	One of GASA gene family which is related to a GA-stimulated transcript (GAST) from tomato. Encodes a Gibberellin-regulated GASA/GAST/Snakin family protein
Wa8730a008g001340	1564.8	-2.65124	3.22e-18	1.16e-15
Wa8730a011g002640	1355.11	-2.68034	4.13e-26	3.06e-23	AT1G80760 AT2G29870	NIP6, NIP6 1, NLM7	Encodes a protein with boron transporter activity. It helps to preferentially direct boron to young developing tissues in the shoot, such as immature leaves, under low boron conditions. This boron channel appears to be impermeable to water, unlike the closely related NIP5 1 boron transporter. This protein also allows the transport of glycerol, urea, and formimide but not larger uncharged solutes …
Wa8730a006g003200	52.2458	-2.70038	0.000113567	0.00696692
Wa8730a010g005510	24.7366	-2.75487	0.000686028	0.0350223	AT1G80820 AT1G76470	ATCCR2, CCR2	Encodes an cinnamoyl CoA reductase isoform. Involved in lignin biosynthesis. NAD(P)-binding Rossmann-fold superfamily protein
Wa8730a013g000360	1762.85	-2.7582	1.7e-06	0.000150314
Wa8730a006g007150	240.093	-2.76222	2.75e-15	8.05e-13
Wa8730a007g008670	2701.92	-2.77719	1.85e-07	1.9e-05	AT3G29260 AT4G03140		NAD(P)-binding Rossmann-fold superfamily protein NAD(P)-binding Rossmann-fold superfamily protein
Wa8730a006g004140	74.3307	-2.84949	6.57e-07	6.41e-05	AT2G41480 AT5G64120 AT5G66390 AT1G05260 AT2G22420 AT2G34060 AT3G21770 AT5G15180 AT5G39580 AT1G49570 AT1G14550	AtPRX25, PRX25 AtPRX71, PRX71 PRX72 RCI3, RCI3A	Encodes a cationic cell-wall-bound peroxidase homolog that is involved in the lignification of cell walls. encodes a cell wall bound peroxidase that is induced by hypo-osmolarity Encodes a peroxidase that is involved in lignin biosynthesis. Encodes a cold-inducible cationic peroxidase that is involved in the stress response. In response to low temperature, RCI3 transcripts accumulate in the aeria…
Wa8730a006g001500	54.55	-2.91404	1.52e-07	1.6e-05	AT1G30650 AT5G45050 AT4G01250 AT5G52830 AT2G34830	AR411, ATWRKY14, WRKY14 ATWRKY16, TTR1, WRKY16 AtWRKY22, WRKY22 ATWRKY27, WRKY27 AtWRKY35, MEE24, WRKY35	member of WRKY Transcription Factor Group II-e Encodes a member of WRKY Transcription Factor (Group II-e) that confers resistance to tobacco ringspot nepovirus. member of WRKY Transcription Factor Group II-e Encodes a WRKY transcription factor WRKY27. Mutation in Arabidopsis WRKY27 results in delayed symptom development in response to the bacterial wilt pathogen Ralstonia solanacearum. member of …
Wa8730a012g004900	389.773	-2.99915	9.08e-23	5.71e-20	AT5G10180 AT1G78000 AT4G08620 AT1G22150	AST68, SULTR2 1 SEL1, SULTR1 2 SULTR1 1 SULTR1 3	Encodes a low-affinity sulfate transporter expressed in the root cap and central cylinder, where it is induced by sulfur starvation. Expression in the shoot vascular system is not induced by sulfur starvation. Encodes a sulfate transporter that can restore sulfate uptake capacity of a yeast mutant lacking sulfate transporter genes. Encodes a sulfate transporter. Contains STAS domain. Expressed in…
Wa8730a015g005510	1309.23	-3.02536	5.11e-32	6.44e-29
Wa8730a016g001950	61.2026	-3.06244	1.35e-06	0.000122675	AT4G19230 AT3G19270	CYP707A1 CYP707A4	Encodes a protein with ABA 8'-hydroxylase activity, involved in ABA catabolism. Member of the CYP707A gene family. CYP707A1 appears to play an important role in determining the ABA levels in dry seeds. Gene involved in postgermination growth. Overexpression of CYP707A1 leads to a decrease in ABA levels and a reduction in after-ripening period to break dormancy. Encodes a protein with ABA 8'-hydro…
Wa8730a014g001670	879.55	-3.07795	3.72e-31	3.65e-28
Wa8730a015g003250	1279.41	-3.10065	7.65e-06	0.000569772	AT3G30842 AT1G15520	ABCG38, ATPDR10, PDR10 ABCG40, ATABCG40, ATPDR12, PDR12	pleiotropic drug resistance 10 ABC transporter family involved in ABA transport and resistance to lead. Localizes to plasma membrane. Upregulated by lead. Expressed in leaves, flowers, stomata and roots.
Wa8730a007g008700	58.7109	-3.30268	5.09e-09	6.9e-07	AT3G12250 AT5G65210 AT1G22070 AT1G08320	BZIP45, TGA6 TGA1 TGA3 TGA9, bZIP21	basic leucine zipper transcription factor involved in the activation of SA-responsive genes. Encodes TGA1, a redox-controlled regulator of systemic acquired resistance. TGA1 targets the activation sequence-1 (as-1) element of the promoter region of defense proteins. TGA1 are S-nitrosylated. Encodes a transcription factor. Like other TGAla-related factors, TGA3 has a highly conserved bZIP region a…
Wa8730a010g004580	146.174	-3.33449	4.6e-16	1.41e-13	AT2G44890	CYP704A1	member of CYP704A
Wa8730a013g001920	21.8953	-3.42671	0.000143	0.00849161	AT4G12330 AT2G45550 AT2G46660 AT1G01190	CYP706A7 CYP76C4 CYP78A6, EOD3 CYP78A8	member of CYP706A member of CYP76C member of CYP78A member of CYP78A
Wa8730a015g000910	35.5559	-3.62151	4.74e-06	0.000361742	AT4G31500 AT5G07990	ATR4, CYP83B1, RED1, RNT1, SUR2 CYP75B1, D501, TT7	Encodes an oxime-metabolizing enzyme in the biosynthetic pathway of glucosinolates. Is required for phytochrome signal transduction in red light. Mutation confers auxin overproduction. Required for flavonoid 3' hydroxylase activity.
Wa8730a010g006700	13.6272	-3.8671	0.000825282	0.0412281	AT2G24390		AIG2-like (avirulence induced gene) family protein
Wa8730a013g001900	78.3935	-3.95836	1.98e-13	4.53e-11	AT4G12310 AT2G45570 AT2G46660 AT1G01190	CYP706A5 CYP76C2 CYP78A6, EOD3 CYP78A8	member of CYP706A member of CYP76C member of CYP78A member of CYP78A
Wa8730a001g007080	109.267	-4.25913	3.85e-05	0.00255377	AT3G55970 AT5G05600 AT5G58660 AT2G38240 AT3G11180 AT3G12900	ATJRG21, JRG21	jasmonate-regulated gene 21 Encodes a protein with similarity to flavonol synthases that is involved in the detoxifcation polycyclic aromatic hydrocarbons. 2-oxoglutarate (2OG) and Fe(II)-dependent oxygenase superfamily protein 2-oxoglutarate (2OG) and Fe(II)-dependent oxygenase superfamily protein 2-oxoglutarate (2OG) and Fe(II)-dependent oxygenase superfamily protein 2-oxoglutarate (2OG) and Fe…
Wa8730a008g005660	8.35058	-6.07053	0.000118822	0.00719162	AT1G11600	CYP77B1	member of CYP77B

## Sheet: Above Water GO
Dataset S2. Enriched GO terms for Differentially Expressed Genes in Above Water Tissues (Top)
GO	Name	Ratio in Study	Ratio in Pop.	p Value	Depth	Study Count	p Value (BH-FDR)	Study Items
GO:0010025	wax biosynthetic process	9/158	48/13944	2.81617e-09	5	9	1.14391e-05	Wa8730a005g001280, Wa8730a011g004580, Wa8730a011g004700, Wa8730a011g004730, Wa8730a011g004850, Wa8730a012g005240, Wa8730a013g005120, Wa8730a014g005820, Wa8730a015g005520
GO:0010166	wax metabolic process	9/158	49/13944	3.41666e-09	4	9	1.14391e-05	Wa8730a005g001280, Wa8730a011g004580, Wa8730a011g004700, Wa8730a011g004730, Wa8730a011g004850, Wa8730a012g005240, Wa8730a013g005120, Wa8730a014g005820, Wa8730a015g005520
GO:1901570	fatty acid derivative biosynthetic process	9/158	51/13944	4.96275e-09	4	9	1.14391e-05	Wa8730a005g001280, Wa8730a011g004580, Wa8730a011g004700, Wa8730a011g004730, Wa8730a011g004850, Wa8730a012g005240, Wa8730a013g005120, Wa8730a014g005820, Wa8730a015g005520
GO:0120252	hydrocarbon metabolic process	7/158	27/13944	1.5409e-08	3	7	2.66383e-05	Wa8730a001g011890, Wa8730a009g005730, Wa8730a011g004580, Wa8730a011g004700, Wa8730a011g004730, Wa8730a013g005120, Wa8730a014g000520
GO:1901568	fatty acid derivative metabolic process	9/158	61/13944	2.56855e-08	3	9	3.55231e-05	Wa8730a005g001280, Wa8730a011g004580, Wa8730a011g004700, Wa8730a011g004730, Wa8730a011g004850, Wa8730a012g005240, Wa8730a013g005120, Wa8730a014g005820, Wa8730a015g005520
GO:0120251	hydrocarbon biosynthetic process	6/158	21/13944	9.07316e-08	4	6	0.000104568	Wa8730a001g011890, Wa8730a011g004580, Wa8730a011g004700, Wa8730a011g004730, Wa8730a013g005120, Wa8730a014g000520
GO:0006629	lipid metabolic process	18/158	428/13944	1.69734e-06	3	18	0.00146714	Wa8730a002g010670, Wa8730a003g004640, Wa8730a005g001280, Wa8730a006g002600, Wa8730a008g000260, Wa8730a009g005730, Wa8730a010g004870, Wa8730a010g005520, Wa8730a011g003860, Wa8730a011g004580, Wa8730a011g004700, Wa8730a011g004730, Wa8730a011g004850, Wa8730a013g005120, Wa8730a015g005520, Wa8730a018g003320, Wa8730a020g002750, Wa8730a020g002790
GO:0006723	cuticle hydrocarbon biosynthetic process	4/158	12/13944	7.31892e-06	5	4	0.00421753	Wa8730a011g004580, Wa8730a011g004700, Wa8730a011g004730, Wa8730a013g005120
GO:0043447	alkane biosynthetic process	4/158	12/13944	7.31892e-06	5	4	0.00421753	Wa8730a011g004580, Wa8730a011g004700, Wa8730a011g004730, Wa8730a013g005120
GO:0043446	cellular alkane metabolic process	4/158	12/13944	7.31892e-06	4	4	0.00421753	Wa8730a011g004580, Wa8730a011g004700, Wa8730a011g004730, Wa8730a013g005120
GO:0030154	cell differentiation	16/158	429/13944	2.93172e-05	3	16	0.0144806	Wa8730a001g004310, Wa8730a004g008010, Wa8730a007g005430, Wa8730a007g007100, Wa8730a009g002870, Wa8730a009g002900, Wa8730a009g002910, Wa8730a010g004870, Wa8730a011g004580, Wa8730a011g004700, Wa8730a011g004730, Wa8730a012g005240, Wa8730a013g005120, Wa8730a016g000060, Wa8730a016g003730, Wa8730a016g003960
GO:0048869	cellular developmental process	17/158	525/13944	9.55889e-05	2	17	0.0403247	Wa8730a001g004310, Wa8730a004g008010, Wa8730a007g002380, Wa8730a007g005430, Wa8730a007g007100, Wa8730a009g002870, Wa8730a009g002900, Wa8730a009g002910, Wa8730a010g004870, Wa8730a011g004580, Wa8730a011g004700, Wa8730a011g004730, Wa8730a012g005240, Wa8730a013g005120, Wa8730a016g000060, Wa8730a016g003730, Wa8730a016g003960
GO:0009860	pollen tube growth	6/158	66/13944	9.97801e-05	6	6	0.0403247	Wa8730a001g004310, Wa8730a007g005430, Wa8730a009g002870, Wa8730a009g002900, Wa8730a009g002910, Wa8730a010g004870
GO:0044255	cellular lipid metabolic process	14/158	378/13944	0.000101528	4	14	0.0403247	Wa8730a002g010670, Wa8730a003g004640, Wa8730a005g001280, Wa8730a006g002600, Wa8730a008g000260, Wa8730a009g005730, Wa8730a010g004870, Wa8730a010g005520, Wa8730a011g003860, Wa8730a011g004850, Wa8730a015g005520, Wa8730a018g003320, Wa8730a020g002750, Wa8730a020g002790
GO:0006139	nucleobase-containing compound metabolic process	1/158	1390/13944	1.62926e-06	4	1	0.00146714	Wa8730a004g008010
GO:0034641	cellular nitrogen compound metabolic process	3/158	1681/13944	5.83277e-06	3	3	0.00421753	Wa8730a004g008010, Wa8730a009g000230, Wa8730a016g002990
GO:0090304	nucleic acid metabolic process	1/158	1196/13944	2.03051e-05	5	1	0.0108008	Wa8730a004g008010
GO:0046483	heterocycle metabolic process	4/158	1543/13944	0.000104967	3	4	0.0403247	Wa8730a001g003320, Wa8730a004g008010, Wa8730a009g000230, Wa8730a016g002990
GO:0005783	endoplasmic reticulum	19/158	549/13944	1.44721e-05	5	19	0.015543	Wa8730a001g011890, Wa8730a002g005800, Wa8730a002g009950, Wa8730a002g010170, Wa8730a005g001280, Wa8730a007g006900, Wa8730a009g001730, Wa8730a010g005520, Wa8730a011g004580, Wa8730a011g004700, Wa8730a011g004730, Wa8730a011g004850, Wa8730a013g005120, Wa8730a014g005820, Wa8730a015g005520, Wa8730a018g003320, Wa8730a019g001620, Wa8730a020g002750, Wa8730a020g002790
GO:0016491	oxidoreductase activity	18/158	465/13944	5.42698e-06	2	18	0.0128348	Wa8730a001g011890, Wa8730a002g010170, Wa8730a002g010670, Wa8730a003g004640, Wa8730a005g001280, Wa8730a007g006900, Wa8730a009g005730, Wa8730a010g005520, Wa8730a011g003860, Wa8730a011g004580, Wa8730a011g004700, Wa8730a011g004730, Wa8730a013g005120, Wa8730a016g002990, Wa8730a018g003320, Wa8730a019g001620, Wa8730a020g002750, Wa8730a020g002790

## Sheet: Below Water GO
Dataset S2. Enriched GO terms for Differentially Expressed Genes in Below Water Tissues (Bottom)
GO	Name	Ratio in Study	Ratio in Pop.	p Value	Depth	Study Count	p Value (BH-FDR)	Study Items
GO:0009791	post-embryonic development	20/104	788/13944	1.2228e-06	2	20	0.0051323	Wa8730a001g008820, Wa8730a003g000450, Wa8730a003g002590, Wa8730a003g003480, Wa8730a004g008240, Wa8730a005g000850, Wa8730a006g001500, Wa8730a006g003620, Wa8730a007g008700, Wa8730a011g001680, Wa8730a013g001900, Wa8730a013g001920, Wa8730a014g001670, Wa8730a014g002160, Wa8730a014g002180, Wa8730a014g002860, Wa8730a014g004240, Wa8730a015g002880, Wa8730a017g004010, Wa8730a020g000340
GO:0046519	sphingoid metabolic process	5/104	27/13944	1.4844e-06	7	5	0.0051323	Wa8730a006g003620, Wa8730a014g001670, Wa8730a014g002160, Wa8730a014g002180, Wa8730a016g000390
GO:0008610	lipid biosynthetic process	11/104	259/13944	3.56475e-06	4	11	0.00646881	Wa8730a003g002590, Wa8730a003g003480, Wa8730a005g001430, Wa8730a006g003620, Wa8730a013g001200, Wa8730a014g001670, Wa8730a014g002160, Wa8730a014g002180, Wa8730a015g005510, Wa8730a016g000390, Wa8730a016g001950
GO:0046520	sphingoid biosynthetic process	4/104	15/13944	3.7419e-06	8	4	0.00646881	Wa8730a006g003620, Wa8730a014g001670, Wa8730a014g002160, Wa8730a014g002180
GO:0030148	sphingolipid biosynthetic process	5/104	36/13944	6.57222e-06	7	5	0.0078427	Wa8730a006g003620, Wa8730a014g001670, Wa8730a014g002160, Wa8730a014g002180, Wa8730a016g000390
GO:0007275	multicellular organism development	25/104	1294/13944	6.80495e-06	3	25	0.0078427	Wa8730a001g008820, Wa8730a003g000450, Wa8730a003g002590, Wa8730a003g003480, Wa8730a004g008240, Wa8730a005g000850, Wa8730a006g001500, Wa8730a006g003620, Wa8730a007g007410, Wa8730a007g008700, Wa8730a009g003240, Wa8730a009g004350, Wa8730a011g001680, Wa8730a013g001900, Wa8730a013g001920, Wa8730a014g000550, Wa8730a014g001670, Wa8730a014g002160, Wa8730a014g002180, Wa8730a014g002860, Wa8730a014g004240, …
GO:0032501	multicellular organismal process	26/104	1429/13944	1.25173e-05	1	26	0.0108197	Wa8730a001g008820, Wa8730a003g000450, Wa8730a003g002590, Wa8730a003g003480, Wa8730a004g008240, Wa8730a005g000850, Wa8730a005g006840, Wa8730a006g001500, Wa8730a006g003620, Wa8730a007g007410, Wa8730a007g008700, Wa8730a009g003240, Wa8730a009g004350, Wa8730a011g001680, Wa8730a013g001900, Wa8730a013g001920, Wa8730a014g000550, Wa8730a014g001670, Wa8730a014g002160, Wa8730a014g002180, Wa8730a014g002860, …
GO:0097164	ammonium ion metabolic process	5/104	42/13944	1.4313e-05	3	5	0.0109971	Wa8730a006g003620, Wa8730a014g001670, Wa8730a014g002160, Wa8730a014g002180, Wa8730a016g000390
GO:0006665	sphingolipid metabolic process	5/104	44/13944	1.8058e-05	6	5	0.0124871	Wa8730a006g003620, Wa8730a014g001670, Wa8730a014g002160, Wa8730a014g002180, Wa8730a016g000390
GO:0009640	photomorphogenesis	5/104	47/13944	2.50579e-05	6	5	0.0157523	Wa8730a006g003620, Wa8730a014g001670, Wa8730a014g002160, Wa8730a014g002180, Wa8730a020g000340
GO:0032502	developmental process	27/104	1616/13944	4.0546e-05	1	27	0.0216857	Wa8730a001g008820, Wa8730a003g000450, Wa8730a003g002590, Wa8730a003g003480, Wa8730a004g008240, Wa8730a005g000850, Wa8730a005g002770, Wa8730a005g006840, Wa8730a006g001500, Wa8730a006g003620, Wa8730a007g007410, Wa8730a007g008700, Wa8730a009g003240, Wa8730a009g004350, Wa8730a011g001680, Wa8730a013g001900, Wa8730a013g001920, Wa8730a014g000550, Wa8730a014g001670, Wa8730a014g002160, Wa8730a014g002180, …
GO:0048856	anatomical structure development	26/104	1532/13944	4.75279e-05	2	26	0.0232768	Wa8730a001g008820, Wa8730a003g000450, Wa8730a003g002590, Wa8730a003g003480, Wa8730a004g008240, Wa8730a005g000850, Wa8730a005g006840, Wa8730a006g001500, Wa8730a006g003620, Wa8730a007g007410, Wa8730a007g008700, Wa8730a009g003240, Wa8730a009g004350, Wa8730a011g001680, Wa8730a013g001900, Wa8730a013g001920, Wa8730a014g000550, Wa8730a014g001670, Wa8730a014g002160, Wa8730a014g002180, Wa8730a014g002860, …
GO:0044550	secondary metabolite biosynthetic process	6/104	101/13944	0.000106384	3	6	0.0408692	Wa8730a005g001430, Wa8730a008g005660, Wa8730a013g001200, Wa8730a013g001900, Wa8730a013g001920, Wa8730a015g000910
GO:0046467	membrane lipid biosynthetic process	5/104	66/13944	0.000130506	6	5	0.0474973	Wa8730a006g003620, Wa8730a014g001670, Wa8730a014g002160, Wa8730a014g002180, Wa8730a016g000390
GO:0046483	heterocycle metabolic process	0/104	1543/13944	1.02916e-05	3	0	0.0101667
GO:0006139	nucleobase-containing compound metabolic process	0/104	1390/13944	4.07684e-05	4	0	0.0216857
GO:0034641	cellular nitrogen compound metabolic process	1/104	1681/13944	5.0492e-05	3	1	0.0232768	Wa8730a006g003620
GO:0006725	cellular aromatic compound metabolic process	1/104	1595/13944	7.52158e-05	3	1	0.0325073	Wa8730a005g001430
GO:0043170	macromolecule metabolic process	5/104	2515/13944	9.81608e-05	3	5	0.0399283	Wa8730a001g008820, Wa8730a011g004740, Wa8730a013g005790, Wa8730a015g003530, Wa8730a020g000340
GO:0090304	nucleic acid metabolic process	0/104	1196/13944	0.000143911	5	0	0.0497573
GO:0009507	chloroplast	0/104	1296/13944	5.9826e-05	6	0	0.0344294
GO:0009536	plastid	0/104	1339/13944	6.41144e-05	5	0	0.0344294
GO:0016705	oxidoreductase activity, acting on paired donors, with incorporation or reduction of molecular oxygen	10/104	91/13944	1.33486e-09	3	10	3.15694e-06	Wa8730a005g001430, Wa8730a008g005660, Wa8730a013g001200, Wa8730a013g001900, Wa8730a013g001920, Wa8730a014g001670, Wa8730a014g002160, Wa8730a014g002180, Wa8730a015g000910, Wa8730a016g001950
GO:0004497	monooxygenase activity	8/104	58/13944	1.02671e-08	3	8	1.21408e-05	Wa8730a003g002590, Wa8730a003g003480, Wa8730a005g001430, Wa8730a008g005660, Wa8730a013g001900, Wa8730a013g001920, Wa8730a015g000910, Wa8730a016g001950
GO:0003700	DNA-binding transcription factor activity	16/104	519/13944	1.38388e-06	2	16	0.00103614	Wa8730a001g011080, Wa8730a002g001360, Wa8730a003g000450, Wa8730a005g002770, Wa8730a005g006840, Wa8730a006g001500, Wa8730a006g003200, Wa8730a007g007410, Wa8730a007g008250, Wa8730a007g008700, Wa8730a009g003240, Wa8730a011g001680, Wa8730a014g000550, Wa8730a015g002880, Wa8730a016g002310, Wa8730a017g004010
GO:0016491	oxidoreductase activity	15/104	465/13944	1.75245e-06	2	15	0.00103614	Wa8730a002g009690, Wa8730a003g002590, Wa8730a003g003480, Wa8730a005g001430, Wa8730a006g004140, Wa8730a008g005660, Wa8730a013g001200, Wa8730a013g001900, Wa8730a013g001920, Wa8730a014g001670, Wa8730a014g002160, Wa8730a014g002180, Wa8730a015g000910, Wa8730a016g000390, Wa8730a016g001950
GO:0140110	transcription regulator activity	16/104	580/13944	5.78628e-06	1	16	0.00273691	Wa8730a001g011080, Wa8730a002g001360, Wa8730a003g000450, Wa8730a005g002770, Wa8730a005g006840, Wa8730a006g001500, Wa8730a006g003200, Wa8730a007g007410, Wa8730a007g008250, Wa8730a007g008700, Wa8730a009g003240, Wa8730a011g001680, Wa8730a014g000550, Wa8730a015g002880, Wa8730a016g002310, Wa8730a017g004010
GO:0016709	oxidoreductase activity, acting on paired donors, with incorporation or reduction of molecular oxygen, NAD(P)H as one donor, and incorporation of one atom of oxygen	5/104	38/13944	8.6476e-06	4	5	0.0034086	Wa8730a008g005660, Wa8730a013g001900, Wa8730a013g001920, Wa8730a015g000910, Wa8730a016g001950
GO:0042284	sphingolipid delta-4 desaturase activity	3/104	11/13944	6.36761e-05	4	3	0.0215134	Wa8730a014g001670, Wa8730a014g002160, Wa8730a014g002180
