# Supplementary material for: Streamlined spatial and environmental expression signatures characterize the minimalist duckweedWolffia australiana
Source: HighWire-hosted journal article supplement (doi:10.1101/gr.279091.124), 2024-07-01
Supplement: Supplemental_Dataset_S3.xlsx [file Supplemental_Dataset_S3.xlsx]

## Sheet: SC A vs SC C
Dataset S3. Differentially Expressed Genes for Dusk Supercluster A vs Supercluster C
Genes showing significant differential expression (log2FC>1 & p_val_adj <0.05 & PCT1 > 10%) in the given supercluster versus all other cells in the dataset
PCT1: Percentage of cells within the Supercluster expressing the gene
PCT2: Percentage of cells outside the Supercluster expressing the gene
Gene	Ave. Log2 FC	p Value	p Value Adj.	PCT1	PCT2	Arabidopsis orthologues	Arabidopsis gene names	Arabidopsis gene description
Wa8730a009g001610	5.59146	4.05667e-163	5.65581e-159	0.72	0.112	AT5G59320	LTP3	Predicted to encode a PR (pathogenesis-related) protein. Belongs to the lipid transfer protein (PR-14) family with the following members: At2g38540/LTP1, At2g38530/LTP2, At5g59320/LTP3, At5g59310/LTP4, At3g51600/LTP5, At3g08770/LTP6, At2g15050/LTP7, At2g18370/LTP8, At2g15325/LTP9, At5g01870/LTP10, At4g33355/LTP11, At3g51590/LTP12, At5g44265/LTP13, At5g62065/LTP14, At4g08530/LTP15.
Wa8730a008g000530	4.52149	3.9829e-178	5.55295e-174	0.756	0.12
Wa8730a001g001120	4.05364	9.21027e-179	1.2841e-174	0.741	0.079
Wa8730a008g003960	4.01438	8.76063e-155	1.22141e-150	0.885	0.54
Wa8730a008g003430	3.82987	1.56875e-78	2.18715e-74	0.427	0.041
Wa8730a001g007340	3.59487	6.27292e-188	8.74571e-184	0.794	0.118	AT2G18800;AT2G06850;AT4G30270;AT4G14130;AT4G25810;AT5G57550	ATXTH21, XTH21;EXGT-A1, EXT, XTH4;MERI-5, MERI5B, SEN4, XTH24;XTH15, XTR7;XTH23, XTR6;XTH25, XTR3	xyloglucan endotransglucosylase/hydrolase 21;endoxyloglucan transferase (EXGT-A1) gene;encodes a protein similar to endo xyloglucan transferase in sequence. It is also very similar to BRU1 in soybean, which is involved in brassinosteroid response.;xyloglucan endotransglycosylase-related protein (XTR7);xyloglucan endotransglycosylase-related protein (XTR6);xyloglucan endotransglycosylase-related p…
Wa8730a015g005520	3.37753	2.16964e-168	3.02491e-164	0.675	0.022
Wa8730a009g003660	3.32159	1.62882e-52	2.2709e-48	0.598	0.309	AT2G38530	LP2, LTP2, cdf3	Involved in lipid transfer between membranes. Belongs to a family of Lipid transfer proteins. Sequence similarity to other plant/Arabidopsis LPT genes but highest similarity to LPT1. Stress and pathogen-inducible motifs found in the upstream region. Expressed in flower, leaves and siliques but absent in roots. Predicted to be a member of PR-14 pathogenesis-related protein family with the followin…
Wa8730a006g005060	3.3194	1.35927e-192	1.89509e-188	0.795	0.112	AT5G15290;AT1G14160	CASP5;	Uncharacterised protein family (UPF0497);Uncharacterised protein family (UPF0497)
Wa8730a004g007430	3.20775	7.79009e-213	1.08609e-208	0.938	0.563
Wa8730a017g001990	3.1203	2.09875e-172	2.92608e-168	0.743	0.102
Wa8730a001g004950	3.07909	3.92241e-181	5.46863e-177	0.816	0.197
Wa8730a009g004870	3.07853	2.91709e-21	4.06701e-17	0.132	0.012
Wa8730a002g005100	3.0323	2.72808e-06	0.0380349	0.172	0.102
Wa8730a020g002750	2.97573	1.44419e-159	2.01349e-155	0.64	0.012	AT1G67730;AT1G24470	ATKCR1, KCR1, YBR159;ATKCR2, KCR2	Encodes one of the two Arabidopsis homologues to YBR159w encoding a S. cerevisiae beta-ketoacyl reductase (KCR), which catalyzes the first reduction during VLCFA (very long chain fatty acids, >18 carbon) elongation: KCR1 (At1g67730), KCR2 (At1g24470). Complementation of the yeast ybr159Delta mutant demonstrated that the two KCR proteins are divergent and that only AtKCR1 can restore heterologous …
Wa8730a013g001880	2.91574	4.51767e-116	6.29854e-112	0.517	0.019	AT1G07240	UGT71C5	Encodes a UDP-glucosyltransferase that plays a role in abscisic acid (ABA) glucosylation from ABA to ABA-glucose ester and regulates ABA homeostasis, thereby influencing the ABA signal network.
Wa8730a014g001630	2.90867	3.67871e-129	5.12886e-125	0.572	0.031
Wa8730a015g005080	2.88165	5.56902e-168	7.76433e-164	0.674	0.021
Wa8730a008g000170	2.87499	1.8269e-70	2.54707e-66	0.362	0.022
Wa8730a008g004660	2.83862	2.58518e-64	3.60426e-60	0.314	0.007
Wa8730a014g001620	2.7968	2.13936e-100	2.9827e-96	0.463	0.017
Wa8730a001g011170	2.76824	1.36862e-170	1.90813e-166	0.789	0.195	AT5G02540;AT2G37540;AT4G11410	;;	NAD(P)-binding Rossmann-fold superfamily protein;NAD(P)-binding Rossmann-fold superfamily protein;NAD(P)-binding Rossmann-fold superfamily protein
Wa8730a005g003480	2.76081	1.78612e-89	2.49021e-85	0.48	0.053	AT5G25610	ATRD22, RD22	responsive to dehydration 22 (RD22) mediated by ABA
Wa8730a002g009150	2.71518	3.30914e-117	4.6136e-113	0.505	0.007	AT1G65060;AT4G19010	4CL3;	encodes an isoform of 4-coumarate:CoA ligase (4CL), which is involved in the last step of the general phenylpropanoid pathway. mRNA levels are not induced in response to wounding or to fungal infection by P. parasitica. mRNA is expressed in flowers, to a lesser degree in mature leaves and siliques and marginally in seedling roots and bolting stems of mature plants. The catalytic efficiency was in…
Wa8730a018g000750	2.61715	5.75806e-106	8.02789e-102	0.507	0.033	AT3G55120	A11, AtCHI, CFI, CHI, TT5	Catalyzes the conversion of chalcones into flavanones. Required for the accumulation of purple anthocyanins in leaves and stems.
Wa8730a019g001620	2.54728	2.07989e-150	2.89979e-146	0.629	0.021	AT3G66658;AT1G44170	ALDH22A1;ALDH3H1, ALDH4	Encodes a putative aldehyde dehydrogenase. The gene is not responsive to osmotic stress and is expressed constitutively at a low level in plantlets and root cultures.;Encodes a protein similar to the aldehyde dehydrogenase cp-ADH from C.plantagineum. Constitutively expressed at low levels.
Wa8730a009g001730	2.54177	8.38918e-153	1.16962e-148	0.794	0.283	AT2G41290;AT1G08470;AT3G57030;AT3G51440	SSL2;SSL3;;	Although this enzyme is predicted to encode a strictosidine synthase (SS), it lacks a conserved catalytic glutamate residue found in active SS enzymes and it is not expected to have SS activity.;Although this enzyme is predicted to encode a strictosidine synthase (SS), it lacks a conserved catalytic glutamate residue found in active SS enzymes and it is not expected to have SS activity.;Calcium-d…
Wa8730a012g003470	2.53746	2.57848e-103	3.59492e-99	0.647	0.208	AT1G53830;AT3G14310;AT4G33220;AT5G49180;AT5G20860;AT3G43270	ATPME2, PME2;ATPME3, OZS2, PME3;ATPME44, PME44;;;	encodes a pectin methylesterase;encodes a pectin methylesterase, targeted by a cellulose binding protein (CBP) from the parasitic nematode Heterodera schachtii during parasitism.;pectin methylesterase 44;Encodes a putative pectin methylesterase. The gene is preferentially expressed in floral buds.;Plant invertase/pectin methylesterase inhibitor superfamily;Plant invertase/pectin methylesterase in…
Wa8730a008g000510	2.47108	8.72668e-44	1.21667e-39	0.436	0.171
Wa8730a006g002600	2.42422	1.03633e-102	1.44485e-98	0.456	0.005	AT1G79460	ATKS, ATKS1, GA2, KS, KS1	Encodes for a protein with ent-kaurene synthase B activity which catalyzes the second step in the cyclization of GGPP to ent-kaurene in the gibberellins biosynthetic pathway.
Wa8730a003g005260	2.41726	5.40874e-105	7.54087e-101	0.73	0.354	AT1G68530;AT1G25450;AT2G26640;AT4G34510;AT5G43760;AT1G19440	CER6, CUT1, G2, KCS6, POP1;CER60, KCS5;KCS11;KCS17;KCS20;KCS4	Encodes KCS6, a member of the 3-ketoacyl-CoA synthase family involved in the biosynthesis of VLCFA (very long chain fatty acids).;Encodes KCS5, a member of the 3-ketoacyl-CoA synthase family involved in the biosynthesis of VLCFA (very long chain fatty acids).;Encodes KCS11, a member of the 3-ketoacyl-CoA synthase family involved in the biosynthesis of VLCFA (very long chain fatty acids).;Encodes …
Wa8730a005g008830	2.38051	3.5368e-133	4.931e-129	0.809	0.351	AT1G30020		Protein of unknown function, DUF538
Wa8730a010g004870	2.36888	7.00503e-118	9.76642e-114	0.63	0.129	AT5G48230	AACT2, ACAT2, EMB1276	Encodes an acetoacetyl-CoA thiolase that generates the bulk of the acetoacetyl-CoA precursor needed for the cytosolic localized, mevalonate-derived isoprenoids biosynthetic pathway. Loss-of-function mutants are embryo lethal.
Wa8730a003g005060	2.34297	1.01113e-101	1.40972e-97	0.457	0.009	AT1G68530;AT1G25450;AT2G26640;AT4G34510;AT5G43760;AT1G19440	CER6, CUT1, G2, KCS6, POP1;CER60, KCS5;KCS11;KCS17;KCS20;KCS4	Encodes KCS6, a member of the 3-ketoacyl-CoA synthase family involved in the biosynthesis of VLCFA (very long chain fatty acids).;Encodes KCS5, a member of the 3-ketoacyl-CoA synthase family involved in the biosynthesis of VLCFA (very long chain fatty acids).;Encodes KCS11, a member of the 3-ketoacyl-CoA synthase family involved in the biosynthesis of VLCFA (very long chain fatty acids).;Encodes …
Wa8730a001g011890	2.32531	7.21128e-137	1.0054e-132	0.835	0.439	AT5G59530;AT2G44800;AT5G43450	;;	2-oxoglutarate (2OG) and Fe(II)-dependent oxygenase superfamily protein;2-oxoglutarate (2OG) and Fe(II)-dependent oxygenase superfamily protein;encodes a protein whose sequence is similar to ACC oxidase
Wa8730a017g002740	2.28346	5.23979e-110	7.30532e-106	0.62	0.145	AT2G16530;AT1G72590	;	Encodes polyprenol reductase involved in N-gylcosylation. Mutants are defective in pollen development. Knockouts are embryo lethal;Encodes a polyphenol reductase.
Wa8730a018g002300	2.27741	1.14667e-81	1.59868e-77	0.582	0.167	AT5G57800	CER3, FLP1, WAX2, YRE	encodes a transmembrane protein with similarity to the sterol desaturase family at the N-terminus and to the short-chain dehydrogenase/reductase family at the C-terminus. Mutant analyses indicate this protein is involved in cuticle membrane and wax biosynthesis.
Wa8730a014g005820	2.22814	6.98654e-108	9.74064e-104	0.642	0.179	AT3G10280;AT4G34510;AT1G04220;AT5G43760;AT1G19440;AT2G16280	KCS14;KCS17;KCS2;KCS20;KCS4;KCS9	Encodes KCS14, a member of the 3-ketoacyl-CoA synthase family involved in the biosynthesis of VLCFA (very long chain fatty acids).;Encodes KCS17, a member of the 3-ketoacyl-CoA synthase family involved in the biosynthesis of VLCFA (very long chain fatty acids).;Encodes KCS2, a member of the 3-ketoacyl-CoA synthase family involved in the biosynthesis of VLCFA (very long chain fatty acids).;Encodes…
Wa8730a009g002590	2.1942	1.29807e-115	1.80977e-111	0.709	0.221	AT3G16770;AT2G47520;AT3G23220;AT1G53910	ATEBP, EBP, ERF72, RAP2.3;AtERF71, ERF71, HRE2;ESE1;RAP2.12	Encodes a member of the ERF (ethylene response factor) subfamily B-2 of the plant specific ERF/AP2 transcription factor family (RAP2.3). The protein contains one AP2 domain. There are 5 members in this subfamily including RAP2.2 AND RAP2.12.It is localized to the nucleus and acts as a transcriptional activator through the GCC-box. It has been identified as a suppressor of Bax-induced cell death b…
Wa8730a011g004850	2.18031	1.08102e-114	1.50716e-110	0.539	0.042
Wa8730a015g001060	2.17858	8.10234e-120	1.12963e-115	0.626	0.096	AT2G18960;AT1G17260;AT4G30190;AT5G57350;AT2G24520;AT2G07560;AT1G80660	AHA1, HA1, OST2, PMA;AHA10;AHA2, HA2, PMA2;AHA3, ATAHA3, HA3;AHA5, HA5;AHA6, HA6;AHA9, HA9	Encodes a plasma membrane proton ATPase. Mutants have a reduced ability to close their stomata in response to drought and are affected in stomatal but not seed responsiveness to ABA.;belongs to H+-APTase gene family, involved in proanthocyanidin biosynthesis, disturbs the vacuolar biogenesis and acidification process;belongs to the P-type ATPase superfamily of cation-transporting ATPases, pumps p…
Wa8730a015g003690	2.1605	1.95164e-111	2.72098e-107	0.543	0.046	AT3G07680	p24beta2	Encodes an Golgi-localized p24 protein. Interacts with p24delta5 at ER export sites for ER exit and coupled transport to the Golgi apparatus. The mRNA is cell-to-cell mobile.
Wa8730a009g002200	2.0479	3.25345e-110	4.53597e-106	0.52	0.037	AT3G05020;AT5G27200	ACP, ACP1;ACP5	encodes an acyl carrier protein expressed in leaves, roots, and dry seeds. Protein is not regulated by light.;encodes an acyl carrier protein
Wa8730a007g006900	2.04511	5.56048e-118	7.75242e-114	0.611	0.088	AT4G34240;AT1G44170	ALDH3, ALDH3I1;ALDH3H1, ALDH4	Aldehyde dehydrogenase induced by ABA and dehydration;Encodes a protein similar to the aldehyde dehydrogenase cp-ADH from C.plantagineum. Constitutively expressed at low levels.
Wa8730a006g004320	2.03027	8.65919e-102	1.20726e-97	0.636	0.184	AT2G41480;AT5G64120;AT1G14540;AT5G66390;AT2G34060;AT5G15180;AT5G39580;AT3G03670;AT1G49570	AtPRX25, PRX25;AtPRX71, PRX71;PER4;PRX72;;;;;	Encodes a cationic cell-wall-bound peroxidase homolog that is involved in the lignification of cell walls.;encodes a cell wall bound peroxidase that is induced by hypo-osmolarity;Peroxidase superfamily protein;Encodes a peroxidase that is involved in lignin biosynthesis.;Peroxidase superfamily protein;Peroxidase superfamily protein;Peroxidase superfamily protein;Peroxidase superfamily protein;Per…
Wa8730a010g004880	2.01091	4.35316e-109	6.06918e-105	0.76	0.401	AT5G55850;AT5G63270;AT5G40645	NOI;;	NOI protein;RPM1-interacting protein 4 (RIN4) family protein;RPM1-interacting protein 4 (RIN4) family protein
Wa8730a008g000640	1.95108	1.0845e-108	1.51202e-104	0.47	0.002
Wa8730a016g000410	1.94135	2.14727e-65	2.99373e-61	0.309	0.002
Wa8730a004g002220	1.92825	4.10425e-62	5.72215e-58	0.308	0.009	AT5G55620;AT5G41761	;	;
Wa8730a003g003400	1.86496	2.79794e-84	3.90088e-80	0.411	0.017	AT4G16442		Uncharacterised protein family (UPF0497)
Wa8730a016g001400	1.79798	1.24426e-98	1.73475e-94	0.72	0.298
Wa8730a018g003530	1.78564	5.90993e-77	8.23963e-73	0.64	0.288	AT1G60810;AT1G09430	ACLA-2;ACLA-3	One of the three genes encoding subunit A of the trimeric enzyme ATP Citrate lyase;Encodes subunit A of the heteromeric enzyme ATP citrate lyase (ACL). In animals, ACL is encoded by a single gene; ACL in Arabidopsis is composed of two polypeptides, ACLA (encoded by 3 genes) and ACLB (encoded by 2 genes). The holoenzyme has an A(4)B(4)stoichiometry. Expression of both ACLA and ACLB but not of eith…
Wa8730a006g004490	1.76135	1.9524e-87	2.72204e-83	0.691	0.331	AT1G24470	ATKCR2, KCR2	Encodes one of the two Arabidopsis homologues to YBR159w encoding a S. cerevisiae beta-ketoacyl reductase (KCR), which catalyzes the first reduction during VLCFA (very long chain fatty acids, >18 carbon) elongation: KCR1 (At1g67730), KCR2 (At1g24470). Complementation of the yeast ybr159Delta mutant demonstrated that the two KCR proteins are divergent and that only AtKCR1 can restore heterologous …
Wa8730a006g006410	1.75425	2.44194e-97	3.40455e-93	0.603	0.138	AT1G21900	p24delta5	Encodes an ER-localized p24 protein. Interacts with p24beta2 at ER export sites for ER exit and coupled transport to the Golgi apparatus. Once in the Golgi, p24delta5 interacts very efficiently with the COPI machinery for retrograde transport back to the ER.
Wa8730a009g005650	1.75398	1.71473e-39	2.39067e-35	0.623	0.398	AT1G27350		Ribosome associated membrane protein RAMP4
Wa8730a011g004580	1.75259	8.64907e-50	1.20585e-45	0.246	0.004	AT5G57800	CER3, FLP1, WAX2, YRE	encodes a transmembrane protein with similarity to the sterol desaturase family at the N-terminus and to the short-chain dehydrogenase/reductase family at the C-terminus. Mutant analyses indicate this protein is involved in cuticle membrane and wax biosynthesis.
Wa8730a012g001710	1.74237	1.88064e-85	2.62199e-81	0.4	0.01	AT5G63790	ANAC102, NAC102	Encodes a member of the NAC family of transcription factors. ANAC102 appears to have a role in mediating response to low oxygen stress (hypoxia) in germinating seedlings.
Wa8730a006g002880	1.73574	4.05613e-87	5.65505e-83	0.477	0.06	AT3G25400
Wa8730a011g004730	1.71005	3.55112e-56	4.95097e-52	0.318	0.029	AT5G57800	CER3, FLP1, WAX2, YRE	encodes a transmembrane protein with similarity to the sterol desaturase family at the N-terminus and to the short-chain dehydrogenase/reductase family at the C-terminus. Mutant analyses indicate this protein is involved in cuticle membrane and wax biosynthesis.
Wa8730a001g010900	1.69546	4.67083e-65	6.51207e-61	0.515	0.165	AT5G16710	DHAR3	The protein undergoes thiolation following treatment with the oxidant tert-butylhydroperoxide.
Wa8730a019g002640	1.68458	1.8088e-84	2.52183e-80	0.506	0.086	AT5G19140	AILP1, ATAILP1	Aluminium induced protein with YGL and LRDR motifs
Wa8730a011g003900	1.67933	1.07477e-71	1.49844e-67	0.422	0.058	AT4G34480;AT5G67460;AT4G26830;AT5G55180	;;;	O-Glycosyl hydrolases family 17 protein;O-Glycosyl hydrolases family 17 protein;O-Glycosyl hydrolases family 17 protein;O-Glycosyl hydrolases family 17 protein
Wa8730a006g007010	1.64949	6.13519e-36	8.55368e-32	0.356	0.11	AT1G72610;AT5G20630	ATGER1, GER1, GLP1;ATGER3, GER3, GLP3, GLP3A, GLP3B	germin-like protein (GLP1);Encodes a germin-like protein. Its transcripts are more abundant in RNA from leaves collected in the evening, suggesting some kind of circadian regulation.
Wa8730a007g004260	1.63675	3.28519e-76	4.58021e-72	0.354	0.004	AT4G08910;AT1G22250;AT1G78170	;;	;;
Wa8730a015g004500	1.61893	1.38928e-63	1.93694e-59	0.564	0.234	AT1G60010;AT1G10530	;	;
Wa8730a009g005630	1.60479	1.06689e-111	1.48746e-107	0.913	0.826
Wa8730a002g009950	1.58849	2.47732e-92	3.45388e-88	0.423	0.007	AT2G28630;AT5G04530	KCS12;KCS19	Encodes KCS12, a member of the 3-ketoacyl-CoA synthase family involved in the biosynthesis of VLCFA (very long chain fatty acids).;Encodes KCS19, a member of the 3-ketoacyl-CoA synthase family involved in the biosynthesis of VLCFA (very long chain fatty acids).
Wa8730a013g005140	1.55821	6.2735e-45	8.74651e-41	0.471	0.174
Wa8730a007g008940	1.55497	2.62766e-77	3.66348e-73	0.455	0.069
Wa8730a013g004710	1.52988	1.28603e-78	1.79299e-74	0.682	0.33	AT5G43360;AT2G32830;AT3G54700	ATPT4, PHT1;3, PHT3;PHT1;5, PHT5;PHT1;7	Encodes Pht1;3, a member of the Pht1 family of phosphate transporters which include: Pht1;1/At5g43350, Pht1;2/At5g43370, Pht1;3/At5g43360, Pht1;4/At2g38940, Pht1;5/At2g32830, Pht1;6/At5g43340, Pht1;7/At3g54700, Pht1;8/At1g20860, Pht1;9/At1g76430 (Plant Journal 2002, 31:341).;Encodes Pht1;5, a member of the Pht1 family of phosphate transporters which include: Pht1;1/At5g43350, Pht1;2/At5g43370, Ph…
Wa8730a011g004700	1.52171	1.11822e-29	1.55902e-25	0.166	0.009	AT5G57800	CER3, FLP1, WAX2, YRE	encodes a transmembrane protein with similarity to the sterol desaturase family at the N-terminus and to the short-chain dehydrogenase/reductase family at the C-terminus. Mutant analyses indicate this protein is involved in cuticle membrane and wax biosynthesis.
Wa8730a001g007240	1.51147	7.30762e-52	1.01883e-47	0.392	0.088	AT3G10320;AT2G41640;AT3G57380	;;	MUCI21 is a GT61 protein required for the production of highly branched xylan in seed coat mucilage. MUCI21 likely decorates xylan with xylose side chains that seem to be necessary for pectin attachment to the seed surface.;Glycosyltransferase family 61 protein;Glycosyltransferase family 61 protein
Wa8730a004g004940	1.51135	1.09795e-60	1.53076e-56	0.288	0.001	AT2G20835
Wa8730a019g003490	1.51027	4.64089e-87	6.47033e-83	0.488	0.066	AT4G01900	GLB1, PII	encodes a PII protein that may function as part of a signal transduction network involved in perceiving the status of carbon and organic nitrogen. Forms a protein complex with N-acetylglutamate kinase and regulates the kinase activity by relieving the feedback inhibition of the kinase by arginine. Regulates acetyl-CoA carboxylase activity.
Wa8730a015g004980	1.50825	1.41031e-65	1.96625e-61	0.55	0.191	AT4G34135;AT2G15490;AT1G24100;AT2G23250	UGT73B2;UGT73B4;UGT74B1;UGT84B2	The At4g34135 gene encodes a flavonol 7-O-glucosyltransferase (EC 2.4.1.237) that glucosylates also with a 20 fold lower activity flavonols (kaempferol and quercetin) at the 3-O-position.;UDP-glycosyltransferase 73B4;Encodes a UDP-glucose:thiohydroximate S-glucosyltransferase, involved in glucosinolate biosynthesis;UDP-glucosyl transferase 84B2
Wa8730a012g003090	1.49359	2.65829e-73	3.70619e-69	0.535	0.154	AT3G02780	IDI2, IPIAT1, IPP2	Encodes a protein with isopentenyl diphosphate:dimethylallyl diphosphate isomerase activity. There is genetic evidence that it functions in the mevalonate, but not the MEP biosynthetic pathway.
Wa8730a001g003100	1.48386	2.85997e-66	3.98737e-62	0.565	0.225	AT4G03180;AT3G06390	;	;Uncharacterised protein family (UPF0497)
Wa8730a012g001190	1.48202	1.00386e-54	1.39958e-50	0.42	0.102	AT3G12203;AT1G33540;AT5G09640;AT3G52000	scpl17;scpl18;SCPL19, SNG2;scpl36	serine carboxypeptidase-like 17;serine carboxypeptidase-like 18;encodes a serine carboxypeptidase-like (SCPL) protein. Mutants accumulate sinapoylglucose instead of sinapoylcholine, and have increased levels of choline and decreased activity of the enzyme sinapoylglucose:choline sinapoyltransferase.;serine carboxypeptidase-like 36
Wa8730a020g002780	1.48171	3.65067e-91	5.08976e-87	0.41	0.004	AT1G67730;AT1G24470	ATKCR1, KCR1, YBR159;ATKCR2, KCR2	Encodes one of the two Arabidopsis homologues to YBR159w encoding a S. cerevisiae beta-ketoacyl reductase (KCR), which catalyzes the first reduction during VLCFA (very long chain fatty acids, >18 carbon) elongation: KCR1 (At1g67730), KCR2 (At1g24470). Complementation of the yeast ybr159Delta mutant demonstrated that the two KCR proteins are divergent and that only AtKCR1 can restore heterologous …
Wa8730a007g003940	1.47625	1.35721e-25	1.89222e-21	0.156	0.014	AT5G13930	ATCHS, CHS, TT4	Encodes chalcone synthase (CHS), a key enzyme involved in the biosynthesis of flavonoids. Required for the accumulation of purple anthocyanins in leaves and stems. Also involved in the regulation of auxin transport and the modulation of root gravitropism.
Wa8730a004g002680	1.472	6.89701e-86	9.6158e-82	0.43	0.025
Wa8730a008g000650	1.4559	2.50952e-103	3.49877e-99	0.928	0.963
Wa8730a015g003450	1.45035	1.01192e-73	1.41082e-69	0.408	0.04	AT4G12920;AT3G02740;AT5G10770	UND;;	Eukaryotic aspartyl protease family protein;Eukaryotic aspartyl protease family protein;Eukaryotic aspartyl protease family protein
Wa8730a008g004200	1.44733	1.01691e-59	1.41777e-55	0.288	0.004	AT3G20395;AT1G12760;AT1G63170	;;	RING/U-box superfamily protein;Zinc finger, C3HC4 type (RING finger) family protein;Zinc finger, C3HC4 type (RING finger) family protein
Wa8730a019g003750	1.44209	2.15756e-67	3.00808e-63	0.491	0.127	AT5G02400;AT3G09400;AT2G46920;AT3G17090	PLL2;PLL3;POL;	Encodes a protein with similarity to the POL locus which is a novel protein phosphatase 2C. Ubiquitously expressed. No phenotype observed in homozygous null mutant background.;Similar to POLTERGEIST (POL) protein phosphatase 2C. No phenotype observed in plants homozygous for a null allele. Ubiquitously expressed.;Pol mutations are recessive, partial suppressors of meristem defects in strong clv1 …
Wa8730a009g006620	1.44179	2.50048e-128	3.48617e-124	0.956	0.885	AT2G21660;AT4G39260;AT3G03920;AT2G14160	ATGRP7, CCR2, GR-RBP7, GRP7;ATGRP8, CCR1, GR-RBP8, GRP8;;	Encodes a small glycine-rich RNA binding protein that is part of a negative-feedback loop through which AtGRP7 regulates the circadian oscillations of its own transcript. Gene expression is induced by cold. GRP7 appears to promote stomatal opening and reduce tolerance under salt and dehydration stress conditions, but, promotes stomatal closing and thereby increases stress tolerance under conditio…
Wa8730a008g004080	1.43472	5.3064e-56	7.39818e-52	0.384	0.076	AT1G11840	ATGLX1, GLX1	Encodes a glyoxalase I homolog ATGLX1.
Wa8730a005g001350	1.43152	2.07919e-12	2.89881e-08	0.141	0.045	AT4G32320;AT1G14540;AT1G71695;AT1G68850;AT5G19890;AT2G37130;AT1G44970;AT4G36430;AT1G49570	APX6;PER4;;;;;;;	Encodes a cytosolic ascorbate peroxidase APX6. Ascorbate peroxidases are enzymes that scavenge hydrogen peroxide in plant cells. Eight types of APX have been described for Arabidopsis: three cytosolic (APX1, APX2, APX6), two chloroplastic types (stromal sAPX, thylakoid tAPX), and three microsomal (APX3, APX4, APX5) isoforms.;Peroxidase superfamily protein;Peroxidase superfamily protein;Peroxidase…
Wa8730a012g004670	1.42427	2.2081e-32	3.07854e-28	0.294	0.082	AT4G39980;AT4G33510;AT1G22410	DHS1;DHS2;	Encodes a 2-deoxy-D-arabino-heptulosonate 7-phosphate (DAHP) synthase, which catalyzes the first committed step in aromatic amino acid biosynthesis. Gene expression is induced by wounding and pathogenic bacteria Pseudomonas syringae.;Enzyme catalyzing the first committed step in aromatic amino acid biosynthesis;Class-II DAHP synthetase family protein
Wa8730a016g000380	1.42059	6.6609e-27	9.28663e-23	0.165	0.015	AT1G69640;AT1G14290	SBH1;SBH2	Encodes one of the two redundant sphingoid base hydroxylases (SBH). Involved in sphingolipid trihydroxy long-chain base (4-hydroxysphinganine) biosynthesis. Double mutants of SBHs were dwarfed and not able to progress from vegetative to reproductive growth.;Encodes one of the two redundant sphingoid base hydroxylases (SBH). Involved in sphingolipid trihydroxy long-chain base (4-hydroxysphinganine…
Wa8730a002g008940	1.40599	2.2727e-106	3.16859e-102	0.951	0.866	AT4G01470;AT5G47450;AT1G17810;AT4G17340;AT2G36830;AT1G31885	ATTIP1.3, GAMMA-TIP3, TIP1;3;ATTIP2;3, DELTA-TIP3, TIP2;3;BETA-TIP;DELTA-TIP2, TIP2;2;GAMMA-TIP, GAMMA-TIP1, TIP1;1;NIP3;1	Encodes AtTIP1;3, functions as water and urea channels in pollen.;Tonoplast intrinsic protein, transports ammonium (NH3) and methylammonium across the tonoplast membrane, gene expression shows diurnal regulation and is upregulated by ammonium (NH3).;beta-tonoplast intrinsic protein (beta-TIP) mRNA, complete;tonoplast intrinsic protein 2;2;Encodes a tonoplast intrinsic protein, which functions as …
Wa8730a004g004850	1.40594	2.84702e-51	3.96932e-47	0.57	0.294	AT3G21690;AT1G61890;AT4G21910;AT1G11670	;;;	MATE efflux family protein;MATE efflux family protein;MATE efflux family protein;MATE efflux family protein
Wa8730a008g005930	1.40384	2.58422e-64	3.60292e-60	0.31	0.005	AT4G21380;AT4G28350;AT1G50610;AT4G03230;AT1G61610;AT4G27290;AT1G11300	ARK3, RK3;LecRK-VII.2;PRK5;;;;	encodes a putative receptor-like serine/threonine protein kinases that is similar to Brassica self-incompatibility (S) locus. Expressed in root. Shoot expression limited to limited to the root-hypocotyl transition zone and at the base of lateral roots as well as in axillary buds, and pedicels.;Concanavalin A-like lectin protein kinase family protein;Leucine-rich repeat protein kinase family prote…
Wa8730a010g002100	1.39948	8.32452e-52	1.1606e-47	0.587	0.297	AT2G43050;AT5G53370;AT3G06830	ATPMEPCRD;ATPMEPCRF, PMEPCRF;	Plant invertase/pectin methylesterase inhibitor superfamily;pectin methylesterase PCR fragment F;Plant invertase/pectin methylesterase inhibitor superfamily
Wa8730a007g004870	1.39246	1.15382e-61	1.60866e-57	0.5	0.146	AT4G10060;AT5G49900;AT1G33700	;;	Beta-glucosidase, GBA2 type family protein;Beta-glucosidase, GBA2 type family protein;Beta-glucosidase, GBA2 type family protein
Wa8730a016g000330	1.38956	5.85046e-58	8.15671e-54	0.603	0.253	AT3G47710;AT1G26945	BHLH161, BNQ3;KDR, PRE6	BNQ3 belongs to a family of atypical non-DNA binding basic helix-loop-helix (bHLH) proteins that heterodimerize with and negatively regulate bHLH transcription factors. Directly and negatively regulated by AP3 and PI in petals. Required for appropriate regulation of flowering time.May also have a role in regulating light responses.;Encodes a basic helix-loop-helix (bHLH) protein involved in blue/…
Wa8730a013g003830	1.38734	1.757e-26	2.44961e-22	0.5	0.29
Wa8730a007g003870	1.36391	4.11082e-69	5.73131e-65	0.407	0.055	AT5G13400		Major facilitator superfamily protein
Wa8730a020g003060	1.36295	1.35912e-66	1.89489e-62	0.442	0.082	AT1G24360		NAD(P)-binding Rossmann-fold superfamily protein
Wa8730a008g003940	1.35611	4.03666e-34	5.62791e-30	0.986	0.996
Wa8730a020g002800	1.32084	1.81844e-71	2.53527e-67	0.338	0.005	AT1G67730;AT1G24470;AT5G65205	ATKCR1, KCR1, YBR159;ATKCR2, KCR2;	Encodes one of the two Arabidopsis homologues to YBR159w encoding a S. cerevisiae beta-ketoacyl reductase (KCR), which catalyzes the first reduction during VLCFA (very long chain fatty acids, >18 carbon) elongation: KCR1 (At1g67730), KCR2 (At1g24470). Complementation of the yeast ybr159Delta mutant demonstrated that the two KCR proteins are divergent and that only AtKCR1 can restore heterologous …
Wa8730a009g001620	1.31716	2.42144e-21	3.37597e-17	0.138	0.015	AT5G05270	AtCHIL, CHIL	Chalcone-flavanone isomerase family protein
Wa8730a006g000440	1.3119	5.74678e-128	8.01216e-124	0.991	0.985	AT5G54770	THI1, THI4, TZ	Encodes a thiamine biosynthetic gene that has a dual function in thiamine biosynthesis and mitochondrial DNA damage tolerance. It appears to be involved in producing the thiazole portion of thiamine (vitamin B1). A crystal structure of the protein reveals that it forms a 2-ring homo-octamer.
Wa8730a015g001170	1.30408	2.82671e-67	3.941e-63	0.323	0.005	AT1G16060;AT1G79700	ADAP, WRI3;WRI4	Encodes ADAP, an AP2-domain protein that interacts with ARIA. ADAP is a positive regulator of the ABA response and is also involved in regulating seedling growth.;WRI4 encodes an AP2/ERF-type transcriptional activator that specifically controls cuticular wax biosynthesis in Arabidopsis stems. It also functions to activate transcription of genes involved fatty acid biosynthesis during seed and flo…
Wa8730a013g002080	1.2985	7.84109e-44	1.0932e-39	0.477	0.196	AT4G11820	FKP1, HMGS, MVA1	Encodes a protein with hydroxymethylglutaryl-CoA synthase activity which was characterized by phenotypical complementation of the S. cerevisiae mutant.
Wa8730a007g003310	1.29544	3.07128e-38	4.28198e-34	0.273	0.045	AT1G74110	CYP78A10	member of CYP78A
Wa8730a004g007170	1.29268	2.31532e-48	3.22802e-44	0.483	0.184	AT1G06460	ACD31.2, ACD32.1	ACD32.1 encodes an alpha-crystallin domain containing protein with homology to small heat shock proteins.
Wa8730a007g007620	1.28805	4.53369e-41	6.32087e-37	0.31	0.061
Wa8730a003g006100	1.2874	3.31739e-73	4.6251e-69	0.385	0.025	AT1G68300		Adenine nucleotide alpha hydrolases-like superfamily protein
Wa8730a017g002730	1.28156	4.07254e-61	5.67794e-57	0.752	0.541	AT1G75600;AT1G13370	;	Histone superfamily protein;Histone superfamily protein
Wa8730a004g005840	1.26947	2.04858e-49	2.85614e-45	0.342	0.06	AT4G37540;AT1G67100;AT1G68510	LBD39;LBD40;LBD42	LOB domain-containing protein 39;LOB domain-containing protein 40;LOB domain-containing protein 42
Wa8730a007g009040	1.26621	1.17304e-49	1.63545e-45	0.685	0.427	AT1G35140;AT5G09440	EXL1, PHI-1;EXL4	At1g35140 (At1g35140/T32G9_32) mRNA, complete cds;EXORDIUM like 4
Wa8730a008g002540	1.26142	7.59625e-66	1.05907e-61	0.402	0.057	AT5G10480	PAS2, PEP	Protein tyrosine phosphatase-like involved in cell division and differentiation. Interacts with CDKA;1 only in its phosphorylated form, preventing dephosphorylation. Overexpression slowed down cell division in suspension cell cultures at the G2-to-M transition and early mitosis and inhibited Arabidopsis seedling growth. Localized in the cytoplasm of dividing cells but moved into the nucleus upon …
Wa8730a013g004070	1.2546	6.21212e-66	8.66094e-62	0.336	0.015	AT5G23210;AT5G08260;AT3G63470	SCPL34;scpl35;scpl40	serine carboxypeptidase-like 34;serine carboxypeptidase-like 35;serine carboxypeptidase-like 40
Wa8730a003g005030	1.24614	5.19375e-48	7.24113e-44	0.486	0.189	AT5G62630;AT1G74790	HIPL2;	hipl2 protein precursor;catalytics
Wa8730a011g002460	1.23664	1.87651e-60	2.61623e-56	0.428	0.093	AT5G61320;AT1G64950;AT3G03470;AT2G12190	CYP89A3;CYP89A5;CYP89A9;	member of CYP89A;member of CYP89A;member of CYP89A;Cytochrome P450 superfamily protein
Wa8730a007g002350	1.2292	2.9956e-66	4.17647e-62	0.338	0.016
Wa8730a016g003000	1.22322	7.41105e-38	1.03325e-33	0.773	0.696	AT1G68530;AT1G25450;AT2G26640;AT1G19440;AT1G71160	CER6, CUT1, G2, KCS6, POP1;CER60, KCS5;KCS11;KCS4;KCS7	Encodes KCS6, a member of the 3-ketoacyl-CoA synthase family involved in the biosynthesis of VLCFA (very long chain fatty acids).;Encodes KCS5, a member of the 3-ketoacyl-CoA synthase family involved in the biosynthesis of VLCFA (very long chain fatty acids).;Encodes KCS11, a member of the 3-ketoacyl-CoA synthase family involved in the biosynthesis of VLCFA (very long chain fatty acids).;Encodes …
Wa8730a007g006660	1.21001	6.33227e-46	8.82845e-42	0.294	0.038	AT1G21680		DPP6 N-terminal domain-like protein
Wa8730a005g005530	1.20678	2.62479e-76	3.65948e-72	0.356	0.004	AT3G49190		O-acyltransferase (WSD1-like) family protein
Wa8730a016g002030	1.20601	4.3724e-50	6.09599e-46	0.683	0.475
Wa8730a003g006990	1.18401	1.52545e-62	2.12678e-58	0.405	0.066	AT1G68530;AT2G26250;AT1G04220;AT1G19440	CER6, CUT1, G2, KCS6, POP1;FDH, KCS10;KCS2;KCS4	Encodes KCS6, a member of the 3-ketoacyl-CoA synthase family involved in the biosynthesis of VLCFA (very long chain fatty acids).;epidermis-specific, encodes KCS10, a putative 3-ketoacyl-CoA synthase. probably involved in the synthesis of long-chain lipids found in the cuticle.;Encodes KCS2, a member of the 3-ketoacyl-CoA synthase family involved in the biosynthesis of VLCFA (very long chain fatt…
Wa8730a019g001460	1.1751	1.35049e-37	1.88285e-33	0.485	0.211	AT2G30490;AT2G40890	ATC4H, C4H, CYP73A5, REF3;CYP98A3	Encodes a cinnamate-4-hydroxylase. Mutations in this gene impact phenylpropanoid metabolism, growth and development.;encodes coumarate 3-hydroxylase (C3H), a P450-dependent monooxygenase. Involved in lignin biosynthesis and flavonoid biosynthesis. Also affects the biosynthesis of coumarins such as scopoletin and scopolin as a branching-out-pathway from the phenylpropanoid acid level.
Wa8730a001g004140	1.175	1.0389e-54	1.44843e-50	0.401	0.087	AT4G02100;AT2G47440;AT1G02650;AT3G62570	;;;	Heat shock protein DnaJ with tetratricopeptide repeat;Tetratricopeptide repeat (TPR)-like superfamily protein;Tetratricopeptide repeat (TPR)-like superfamily protein;Tetratricopeptide repeat (TPR)-like superfamily protein
Wa8730a002g004140	1.1736	1.05626e-62	1.47264e-58	0.321	0.014	AT2G17730;AT1G74410;AT4G35840;AT5G37270;AT5G66070	NIP2;;;;	Intrinsic thylakoid membrane protein that fixes RPOTmp on the stromal side of the thylakoid membrane.;RING/U-box superfamily protein;RING/U-box superfamily protein;RING/U-box superfamily protein;RING/U-box superfamily protein
Wa8730a005g001370	1.17099	2.1291e-43	2.96839e-39	0.309	0.053	AT2G28305;AT5G26140;AT2G37210;AT3G53450;AT5G03270;AT5G11950	ATLOG1, LOG1;ATLOG9, LOG9;LOG3;LOG4;LOG6;LOG8	Putative lysine decarboxylase family protein;Putative lysine decarboxylase family protein;Encodes a protein of unknown function. It has been crystallized and shown to be structurally almost identical to the protein encoded by At5g11950.;Putative lysine decarboxylase family protein;lysine decarboxylase family protein;Encodes a protein of unknown function. It has been crystallized and shown to be s…
Wa8730a002g007490	1.16548	2.38774e-49	3.32898e-45	0.553	0.259	AT2G38040	CAC3	encodes the carboxyltransferase alpha subunit of acetyl-CoA carboxylase, involved in de novo fatty acid biosynthesis
Wa8730a004g004950	1.16368	2.25785e-52	3.14789e-48	0.253	0.001	AT2G20835
Wa8730a007g002140	1.16235	8.78371e-37	1.22462e-32	0.32	0.077	AT5G48500
Wa8730a016g002580	1.16012	1.44433e-49	2.01369e-45	0.549	0.226	AT1G65820		microsomal glutathione s-transferase, putative
Wa8730a008g005750	1.15993	5.699e-39	7.94555e-35	0.49	0.211	AT1G11260;AT1G50310;AT4G21480	ATSTP1, STP1;ATSTP9, STP9;STP12	Encodes a H+/hexose cotransporter.;sugar transporter 9;Putative sugar transporter. Expressed in nematode-induced root syncytia.
Wa8730a011g000210	1.15981	1.2063e-38	1.68182e-34	0.439	0.18	AT5G16240;AT3G02630	;	Plant stearoyl-acyl-carrier-protein desaturase family protein;Plant stearoyl-acyl-carrier-protein desaturase family protein
Wa8730a006g006040	1.15307	1.55344e-64	2.1658e-60	0.331	0.015
Wa8730a012g005240	1.1411	3.80554e-51	5.30569e-47	0.289	0.021	AT3G28910;AT1G74650;AT4G12350;AT1G08810;AT3G47600	ATMYB30, MYB30;ATMYB31, ATY13, MYB31;AtMYB42, MYB42;AtMYB60, MYB60;ATMYB94, ATMYBCP70, MYB94	transcription factor myb homologue;Member of the R2R3 factor gene family.;Encodes a putative transcription factor (MYB42).;putative transcription factor of the R2R3-MYB gene family. Transcript increases under conditions that promote stomatal opening (white and blue light, abi1-1 mutation) and decreases under conditions that trigger stomatal closure (ABA, desiccation, darkness), with the exception…
Wa8730a018g000020	1.13219	8.51237e-47	1.18679e-42	0.657	0.424	AT3G11250;AT2G40010	;	Ribosomal protein L10 family protein;Ribosomal protein L10 family protein
Wa8730a007g008540	1.13022	8.43094e-66	1.17544e-61	0.814	0.645	AT3G52590;AT2G36170	EMB2167, ERD16, HAP4, UBQ1;RPL40A, UBQ2	Ubiquitin extension protein;Ubiquitin supergroup;Ribosomal protein L40e
Wa8730a010g003570	1.12823	1.3321e-40	1.85721e-36	0.544	0.278	AT1G13390;AT1G68490;AT3G02555	;;	;;
Wa8730a004g003130	1.11929	4.88156e-26	6.80587e-22	0.471	0.257	AT3G24540	AtPERK3, PERK3	Encodes a member of the proline-rich extensin-like receptor kinase (PERK) family. This family consists of 15 predicted receptor kinases (PMID: 15653807).
Wa8730a005g002930	1.10082	4.61523e-30	6.43456e-26	0.367	0.148	AT5G11650		alpha/beta-Hydrolases superfamily protein
Wa8730a014g003780	1.09357	3.74359e-44	5.21931e-40	0.633	0.398	AT3G60245		Zinc-binding ribosomal protein family protein
Wa8730a015g003760	1.07914	1.51911e-52	2.11795e-48	0.321	0.035	AT5G55730;AT4G12730	FLA1;FLA2	fasciclin-like arabinogalactan-protein 1 (Fla1);AF333971 Arabidopsis thaliana fasciclin-like arabinogalactan-protein 2 (Fla2) mRNA, complete cds
Wa8730a013g005120	1.078	2.58554e-39	3.60476e-35	0.35	0.094
Wa8730a001g009150	1.07727	7.60344e-40	1.06007e-35	0.444	0.176
Wa8730a004g002960	1.07582	5.42851e-36	7.56842e-32	0.411	0.154	AT4G29780;AT5G12010	;	;
Wa8730a001g008780	1.06563	1.23482e-60	1.72158e-56	0.296	0.005	AT2G05990	ENR1, MOD1	Encodes enoyl-ACP reductase a component of the fatty acid synthase complex. A reduced function mutation in this gene, mod1, was found in a screen for premature cell death mutants. Mutant plants have reduced lipid level and pleiotropic morphological defects, including chlorotic and abnormally shaped leaves.
Wa8730a006g001720	1.06177	8.28525e-52	1.15513e-47	0.76	0.576	AT5G47930		Zinc-binding ribosomal protein family protein
Wa8730a003g006060	1.05819	1.21404e-39	1.69262e-35	0.621	0.386	AT5G10360	EMB3010, RPS6B	RPS6A and RPS6B are fully redundant and essential during gametogenesis.
Wa8730a003g006910	1.05618	6.29029e-40	8.76992e-36	0.236	0.019	AT3G63410	APG1, E37, IEP37, VTE3	Encodes a MPBQ/MSBQ methyltransferase located in the chloroplast inner envelope membrane. Mutant plants lack plastoquinone (PQ), suggesting that the APG1 protein is involved in the methylation step of PQ biosynthesis. The gene product is also involved in tocopherol (vitamin E) biosynthesis.
Wa8730a014g000630	1.05353	3.33068e-28	4.64363e-24	0.681	0.494
Wa8730a014g001330	1.05324	7.96552e-34	1.11055e-29	0.74	0.582	AT2G03680;AT1G26355;AT1G69230;AT3G02180;AT5G15600	SKU6, SPR1;SP1L1;SP1L2;SP1L3;SP1L4	The SPR1 gene encodes a plant-specific 12-kD protein which has a repeated motif at both ends, separated by a predicted rod-like domain, suggesting that it may act as an intermolecular linker. Ubiquitously expressed and belongs to a six-member gene family in Arabidopsis; expressed in transgenic seedlings localized to microtubules within the cortical array, preprophase band, phragmoplast, and mitot…
Wa8730a008g004210	1.05052	8.12656e-10	1.133e-05	0.452	0.347	AT4G21960	PRXR1	Encodes AT4g21960 (AT4g21960/T8O5_170).
Wa8730a002g007630	1.04971	1.28154e-31	1.78673e-27	0.332	0.115	AT5G38630	ACYB-1, CYB-1	Encodes for cytochrome b561.
Wa8730a009g000760	1.04953	1.46247e-47	2.03898e-43	0.73	0.529	AT5G02960;AT3G09680	;	Ribosomal protein S12/S23 family protein;Ribosomal protein S12/S23 family protein
Wa8730a001g012110	1.04307	1.81767e-28	2.5342e-24	0.146	0.002	AT3G54040		PAR1 protein
Wa8730a014g006080	1.04185	3.50389e-40	4.88513e-36	0.54	0.287
Wa8730a007g003750	1.04082	3.88168e-46	5.41183e-42	0.737	0.572	AT5G13330;AT5G51190;AT2G33710;AT5G61890	Rap2.6L;;;	encodes a member of the ERF (ethylene response factor) subfamily B-4 of ERF/AP2 transcription factor family. The protein contains one AP2 domain. There are 7 members in this subfamily.;encodes a member of the ERF (ethylene response factor) subfamily B-3 of ERF/AP2 transcription factor family. The protein contains one AP2 domain. There are 18 members in this subfamily including ATERF-1, ATERF-2, A…
Wa8730a001g004070	1.03866	2.46707e-43	3.43959e-39	0.277	0.033	AT2G32460;AT3G62610;AT5G49330;AT2G47460;AT3G23250;AT4G28110;AT5G54230;AT3G13540;AT1G56160;AT5G56110;AT4G26930	ATM1, ATMYB101, MYB101;ATMYB11, MYB11, PFG2;ATMYB111, MYB111, PFG3;ATMYB12, MYB12, PFG1;ATMYB15, ATY19, MYB15;AtMYB41, MYB41;AtMYB49, MYB49;ATMYB5, MYB5;ATMYB72, MYB72;ATMYB80, AtMYB103, MS188, MYB103, MYB80;AtMYB97, MYB97	Member of the R2R3 factor gene family.;Member of the R2R3 factor gene family.;Member of the R2R3 factor gene family.;MYB12 belongs to subgroup 7 of the R2R3-MYB family. It strongly activates the promoters of chalcone synthase (CHS), flavanone 3-hydroxylase (F3H), flavonol synthase (FLS) and - to a lesser extent - chalcone flavanone isomerase (CHI), but cannot activate the promoters of flavonoid-3…
Wa8730a003g000920	1.03808	5.65113e-34	7.87881e-30	0.322	0.092
Wa8730a012g004760	1.03248	2.63582e-51	3.67487e-47	0.316	0.037	AT5G26340;AT1G77210;AT1G50310;AT1G34580	ATSTP13, MSS1, STP13;AtSTP14, STP14;ATSTP9, STP9;	Encodes a protein with high affinity, hexose-specific/H+ symporter activity. The activity of the transporter appears to be negatively regulated by phosphorylation. Importantly, microarray analysis, as well as the study of the expression of this gene in mutants involved in programmed cell death (PCD) demonstrated a tight correlation between this gene's expression and PCD.;AtSTP14 belongs to the fa…
Wa8730a017g003810	1.03176	2.41114e-51	3.36161e-47	0.256	0.005
Wa8730a010g002940	1.02636	4.72707e-39	6.59048e-35	0.648	0.433
Wa8730a006g001790	1.02479	6.61684e-35	9.2252e-31	0.467	0.21	AT3G22310;AT5G40490;AT1G15830	ATRH9, PMH1;;	Sequence similarity ot DEAD-box RNA helicases. Binds RNA and DNA. Involved in drought, salt and cold stress responses.;HLP1 is a member of the conserved hnRNP A/B family and contains RNA Recognition Motifs (RRM).It binds mRNA and appears to be involved in targeting alternative polyadenylation (APA). APA targets include genes involved in flowering. Loss of HLP1 function results causes late floweri…
Wa8730a002g009040	1.0154	2.72225e-54	3.79536e-50	0.276	0.009
Wa8730a003g004710	1.01532	8.1085e-43	1.13049e-38	0.717	0.555	AT5G64140	RPS28	Encodes a putative ribosomal protein S28.
Wa8730a005g005630	1.01225	9.04986e-49	1.26173e-44	0.267	0.015	AT4G20430;AT5G45650	;	Subtilase family protein;subtilase family protein
Wa8730a008g005470	1.00743	8.7788e-38	1.22394e-33	0.801	0.655	AT5G54500;AT4G36750;AT4G27270	FQR1;;	Encodes a flavin mononucleotide-binding flavodoxin-like quinone reductase that is a primary auxin-response gene.;Quinone reductase family protein;Quinone reductase family protein
Wa8730a011g000310	1.00093	4.73553e-48	6.60227e-44	0.36	0.074	AT2G35740;AT3G03090;AT5G17010	ATINT3, INT3;AtVGT1, VGT1;	nositol transporter 3;Encodes a vacuolar membrane-localized glucose transporter that can also transport fructose. Mutations in these gene have effects on seed germination and time to flowering.;Major facilitator superfamily protein
Wa8730a018g001000	1.00009	2.48615e-40	3.46619e-36	0.71	0.531	AT1G07930;AT5G60390	;	GTP binding Elongation factor Tu family protein;GTP binding Elongation factor Tu family protein
Wa8730a004g003260	-1.00445	1.92237e-47	2.68017e-43	0.004	0.205	AT3G24420		alpha/beta-Hydrolases superfamily protein
Wa8730a010g006700	-1.0073	3.86136e-74	5.38351e-70	0.007	0.311	AT2G24390		AIG2-like (avirulence induced gene) family protein
Wa8730a009g004260	-1.01837	1.87631e-35	2.61596e-31	0.59	0.751	AT1G02335;AT3G62020;AT1G09560;AT3G05930;AT3G04200	GL22, PDGLP2;GLP10;GLP5, PDGLP1;GLP8;	Encodes a plasodesmata-located protein involved in regulating primary root growth by controlling phloem-mediated allocation of resources between the primary and lateral root meristems.;germin-like protein (GLP10);germin-like protein (GLP5);germin-like protein (GLP8);RmlC-like cupins superfamily protein
Wa8730a011g002640	-1.01853	6.91005e-68	9.634e-64	0.031	0.345	AT1G80760;AT2G29870	NIP6, NIP6;1, NLM7;	Encodes a protein with boron transporter activity. It helps to preferentially direct boron to young developing tissues in the shoot, such as immature leaves, under low boron conditions. This boron channel appears to be impermeable to water, unlike the closely related NIP5;1 boron transporter. This protein also allows the transport of glycerol, urea, and formimide but not larger uncharged solutes …
Wa8730a001g010580	-1.01914	1.09201e-42	1.52248e-38	0.026	0.239	AT3G09590;AT4G33720;AT4G31470	;;	CAP (Cysteine-rich secretory proteins, Antigen 5, and Pathogenesis-related 1 protein) superfamily protein;CAP (Cysteine-rich secretory proteins, Antigen 5, and Pathogenesis-related 1 protein) superfamily protein;CAP (Cysteine-rich secretory proteins, Antigen 5, and Pathogenesis-related 1 protein) superfamily protein
Wa8730a011g005690	-1.02261	3.62419e-42	5.05284e-38	0.06	0.3
Wa8730a015g000680	-1.02361	4.05134e-44	5.64838e-40	0.535	0.722
Wa8730a001g007510	-1.02892	1.03253e-75	1.43955e-71	0.749	0.886	AT1G51650		ATP synthase epsilon chain, mitochondrial
Wa8730a012g000820	-1.02915	9.30388e-56	1.29715e-51	0.597	0.792	AT1G71950		SPI-1 is a member of the I9 inhibitor family. It is an inhibitor of SBT4.13 subtilase.
Wa8730a016g000390	-1.03303	5.31781e-73	7.41409e-69	0.016	0.328
Wa8730a019g000800	-1.0344	2.94658e-92	4.10812e-88	0.791	0.939
Wa8730a009g004350	-1.05085	2.79087e-64	3.89104e-60	0.022	0.313	AT1G02520;AT3G62150;AT4G01820;AT2G47000	ABCB11, MDR8, PGP11;ABCB21, PGP21;ABCB3, MDR3, PGP3;ABCB4, ATPGP4, AtABCB4, MDR4, PGP4	Encodes an ATP-binding cassette (ABC) transporter. Expressed in the vascular tissue of primary stem. The mRNA is cell-to-cell mobile.;Encodes a facultative transporter controlling auxin concentrations in plant cells.;member of MDR subfamily;Multidrug resistance P-glycoprotein (MDR/PGP) subfamily of ABC transporters. Functions in the basipetal redirection of auxin from the root tip. Exhibits apola…
Wa8730a011g003030	-1.05434	2.77521e-39	3.86919e-35	0.077	0.314	AT4G19690;AT3G12750;AT1G31260	ATIRT1, IRT1;AtZIP1, ZIP1;ZIP10	Fe(II) transport protein (IRT1);A member of Zrt- and Irt-related protein (ZIP) family. transcript is induced in response to zinc deficiency in the root.;member of Fe(II) transporter isolog family
Wa8730a009g000440	-1.05571	1.12716e-84	1.57149e-80	0.767	0.913	AT3G55440	ATCTIMC, CYTOTPI, TPI	Encodes triosephosphate isomerase.
Wa8730a010g001200	-1.08277	8.60556e-84	1.19979e-79	0.689	0.859	AT4G29350;AT5G56600;AT2G19770	PFN2, PRF2, PRO2;PFN3, PRF3;PRF5	Encodes profilin2, a low-molecular weight, actin monomer-binding protein that regulates the organization of actin cytoskeleton. Expressed in vegetative organs. The first intron of PRF2 enhances gene expression.;Encodes profilin3, a low-molecular weight, actin monomer-binding protein that regulates the organization of actin cytoskeleton. Originally known as profilin5, and later named profilin3. Ex…
Wa8730a019g003170	-1.08606	9.49393e-88	1.32364e-83	0.731	0.914	AT3G10300;AT5G04170	;	Calcium-binding EF-hand family protein;Calcium-binding EF-hand family protein
Wa8730a013g005520	-1.08768	1.7664e-68	2.46271e-64	0.068	0.422
Wa8730a001g006760	-1.09251	9.20361e-30	1.28317e-25	0.242	0.485
Wa8730a016g000500	-1.11643	2.5187e-58	3.51157e-54	0.329	0.666	AT5G09960;AT5G64850	;	;
Wa8730a015g003240	-1.11901	1.59722e-55	2.22684e-51	0.221	0.582	AT3G30842;AT1G15520	ABCG38, ATPDR10, PDR10;ABCG40, ATABCG40, ATPDR12, PDR12	pleiotropic drug resistance 10;ABC transporter family involved in ABA transport and resistance to lead. Localizes to plasma membrane. Upregulated by lead. Expressed in leaves, flowers, stomata and roots.
Wa8730a001g006600	-1.12561	1.17244e-53	1.63462e-49	0.387	0.66
Wa8730a014g001670	-1.12986	1.96318e-88	2.73706e-84	0.005	0.354
Wa8730a020g001670	-1.13559	1.50737e-45	2.10157e-41	0.418	0.665	AT5G63400;AT4G25280;AT5G50370	ADK1;;	encodes a protein similar to adenylate kinase.;P-loop containing nucleoside triphosphate hydrolases superfamily protein;Adenylate kinase family protein
Wa8730a004g004750	-1.14512	7.01692e-76	9.78298e-72	0.624	0.847
Wa8730a017g002190	-1.14648	1.9208e-62	2.67798e-58	0.021	0.301	AT2G17120	CL-1, LYM2, LYP1	Induction of chitin-responsive genes by chitin treatment is not blocked in the mutant. It contains a C-terminal GPI anchor signal and is an ortholog of OsCEBiP.
Wa8730a007g007580	-1.15099	1.28668e-43	1.79389e-39	0.273	0.538
Wa8730a002g003240	-1.15416	1.15143e-57	1.60532e-53	0.014	0.268	AT1G12110	ATNRT1, AtNPF6.3, B-1, CHL1, CHL1-1, NPF6.3, NRT1, NRT1.1	Encodes NRT1.1 (CHL1), a dual-affinity nitrate transporter. The protein is expressed in guard cells and function in stomatal opening. Mutants have less transpiration and are more tolerant to drought. Expressed in lateral roots. Involved in nitrate signaling which enables the plant root system to detect and exploit nitrate-rich soil patches. Comparing to the wild type, the mutant displays a strong…
Wa8730a013g005830	-1.16083	4.07846e-94	5.68619e-90	0.744	0.891	AT1G04410	c-NAD-MDH1	predicted to encode a cytosolic malate dehydrogenase.
Wa8730a016g001990	-1.16147	3.22751e-64	4.49979e-60	0.484	0.793
Wa8730a010g005880	-1.16294	4.84025e-37	6.74828e-33	0.162	0.416	AT1G80920	AtJ8, AtToc12, DJC22, J8, Toc12	A nuclear encoded soluble protein found in the chloroplast stroma.
Wa8730a004g001700	-1.16328	5.08308e-41	7.08683e-37	0.354	0.646	AT5G60490;AT5G44130;AT2G20520	AtFLA12, FLA12;FLA13;FLA6	Encodes a member of fasciclin-like arabinogalactan proteins (FLAs) containing a cell adhesion fasciclin (FAS) domain. Mutations result in altered stem biomechanics with reduced tensile strength and reduced tensile modulus of elasticity, as well as altered cell wall architecture and composition, with increased cellulose microfibril angle, reduced arabinose, galactose and cellulose content.;FASCICL…
Wa8730a015g004220	-1.16603	3.00102e-72	4.18402e-68	0.569	0.815	AT3G02360		6-phosphogluconate dehydrogenase family protein
Wa8730a013g005770	-1.1825	1.29368e-60	1.80365e-56	0.124	0.463	AT4G14365;AT3G23280	XBAT34;XBAT35	XB3 ortholog 4 in Arabidopsis thaliana;Encodes a ubiquitin ligase that is a novel player in ethylene signaling involved in negatively regulating apical hook curvature, with alternative splicing controlling dual targeting to the nuclear and cytoplasmic compartments.
Wa8730a006g001340	-1.19615	1.93823e-64	2.70228e-60	0.601	0.797	AT1G79550	PGK	Encodes cytosolic phosphoglycerate kinase (PGK).
Wa8730a003g000340	-1.19695	1.10483e-49	1.54036e-45	0.425	0.687	AT3G19450;AT4G34230;AT4G37970	ATCAD4, CAD, CAD-C, CAD4;ATCAD5, CAD-5, CAD5;ATCAD6, CAD6	Encodes a catalytically active cinnamyl alcohol dehydrogenase which uses p-coumaryl aldehyde as a preferred substrate. It can also use caffeyl, coniferyl and d-hydroxyconiferyl aldehydes as substrates.;Encodes a catalytically active cinnamyl alcohol dehydrogenase which uses p-coumaryl aldehyde as a preferred substrate. It can also use sinapyl, caffeyl, coniferyl and d-hydroxyconiferyl aldehydes a…
Wa8730a002g002720	-1.19764	7.92571e-59	1.105e-54	0.358	0.679	AT3G60780;AT2G45360;AT1G62840;AT1G12320;AT5G62280	;;;;	Protein of unknown function (DUF1442);Protein of unknown function (DUF1442);Protein of unknown function (DUF1442);Protein of unknown function (DUF1442);Protein of unknown function (DUF1442)
Wa8730a002g006740	-1.19907	2.34879e-44	3.27469e-40	0.196	0.485	AT1G66120;AT2G17650;AT1G21540;AT1G75960	AAE11, AtAAE11;;;	AMP-dependent synthetase and ligase family protein;AMP-dependent synthetase and ligase family protein;AMP-dependent synthetase and ligase family protein;AMP-dependent synthetase and ligase family protein
Wa8730a009g004310	-1.20728	6.18023e-78	8.61647e-74	0.038	0.395	AT1G02335;AT3G62020;AT1G09560;AT3G05930;AT3G04200	GL22, PDGLP2;GLP10;GLP5, PDGLP1;GLP8;	Encodes a plasodesmata-located protein involved in regulating primary root growth by controlling phloem-mediated allocation of resources between the primary and lateral root meristems.;germin-like protein (GLP10);germin-like protein (GLP5);germin-like protein (GLP8);RmlC-like cupins superfamily protein
Wa8730a004g003300	-1.20781	6.63752e-80	9.25403e-76	0.005	0.326
Wa8730a006g003200	-1.21261	3.61951e-79	5.04632e-75	0.037	0.39
Wa8730a007g001470	-1.23075	6.41749e-87	8.94726e-83	0.652	0.85	AT4G25130	MSRA4, PMSR4	Encodes a chloroplast-localized methionine sulfoxide reductase that is a member of the MSRA family. Involved in protection of chloroplasts from oxidative stress.
Wa8730a020g002340	-1.23448	1.35163e-64	1.88445e-60	0.589	0.798	AT1G22840	ATCYTC-A, CYTC-1	Encodes cytochrome c. Contains two site II (TGGGCC/T) elements, which interact with a TCP-domain transcription factor, and a downstream internal telomeric repeat, and are required for expression of the Cytc-1 gene. Promoter directs preferential expression in root and shoot meristems and in anthers.
Wa8730a003g003040	-1.23499	1.47419e-73	2.05532e-69	0.094	0.465	AT5G61130;AT5G08000;AT1G18650;AT1G69295;AT4G13600;AT1G26450;AT1G13830;AT2G03505	AtPDCB1, PDCB1;E13L3, PDCB2;PDCB3;PDCB4;;;;	Encodes a plasmodesmatal localized protein with callose binding activity. The function of PDCB1 is unknown but overexpression leads to the hyperaccumulation of callose.;Encodes a member of the X8-GPI family of proteins. It localizes to the plasmodesmata and binds callose.;Encodes a member of the X8-GPI family of proteins. It localizes to the plasmodesmata and is predicted to bind callose.;Encodes…
Wa8730a010g002420	-1.25049	1.89687e-52	2.64461e-48	0.371	0.656	AT1G53310;AT2G42600;AT3G14940	ATPEPC1, ATPPC1, PEPC1, PPC1;ATPPC2, PPC2;ATPPC3, PPC3	Encodes one of four Arabidopsis phosphoenolpyruvate carboxylase proteins.;Encodes one of four Arabidopsis phosphoenolpyruvate carboxylase proteins.;Encodes a cytosolic phosphoenolpyruvate carboxylase (PEPC) that has activity when expressed in E.coli. Its mRNA is most abundantly expressed in roots and siliques. PPC3 belongs to the plant-type PEPC family. It can form an enzymatically active complex…
Wa8730a015g004370	-1.25527	1.36859e-54	1.90808e-50	0.294	0.605	AT3G01470;AT1G69780;AT2G22430	ATHB-1, ATHB1, HAT5, HB-1, HD-ZIP-1;ATHB13;ATHB6, HB6	Encodes a homeodomain leucine zipper class I (HD-Zip I) transcriptional activator involved in leaf development.;Encodes a homeodomain leucine zipper class I (HD-Zip I) protein.;Encodes a homeodomain leucine zipper class I (HD-Zip I) protein that is a target of the protein phosphatase ABI1 and regulates hormone responses in Arabidopsis.
Wa8730a016g002960	-1.27808	1.07847e-110	1.50361e-106	0.73	0.908	AT1G22300;AT5G10450;AT1G78300;AT4G09000;AT1G26480;AT5G16050;AT3G02520	14-3-3EPSILON, GF14, GRF10;14-3-3lambda, AFT1, GRF6;14-3-3OMEGA, GF14, GRF2;GF14, GRF1;GF14, GRF12;GF14, GRF5;GF14, GRF7	Encodes a 14-3-3 protein. This protein is reported to interact with the BZR1 transcription factor involved in brassinosteroid signaling and may affect the nucleocytoplasmic shuttling of BZR1;Encodes a member of the 14-3-3 gene family that is a lambda isoform (14-3-3&#955;). Interacts with APX3 (ascorbate peroxidase) and AKR2 , suggesting a role in mediating oxidative metabolism in stress response…
Wa8730a012g004800	-1.28012	1.81235e-54	2.52677e-50	0.315	0.625	AT4G08685;AT1G78040	SAH7;	Encodes a protein, expressed in leaves, with similarity to pollen allergens.;Pollen Ole e 1 allergen and extensin family protein
Wa8730a001g007430	-1.29001	3.51806e-90	4.90488e-86	0.133	0.581	AT4G25850;AT5G57240	ORP4B;ORP4C	OSBP(oxysterol binding protein)-related protein 4B;OSBP(oxysterol binding protein)-related protein 4C
Wa8730a005g002760	-1.2963	8.76482e-72	1.22199e-67	0.175	0.55	AT4G29220;AT4G26270;AT4G32840;AT5G56630	PFK1;PFK3;PFK6;PFK7	phosphofructokinase 1;phosphofructokinase 3;phosphofructokinase 6;phosphofructokinase 7
Wa8730a003g005930	-1.29997	6.64578e-54	9.26555e-50	0.297	0.614	AT3G19320;AT1G49750;AT4G06744	;;	Leucine-rich repeat (LRR) family protein;Leucine-rich repeat (LRR) family protein;Leucine-rich repeat (LRR) family protein
Wa8730a010g000090	-1.30085	8.35542e-73	1.16491e-68	0.662	0.854
Wa8730a012g005020	-1.30441	4.0779e-62	5.68541e-58	0.018	0.295	AT1G14290	SBH2	Encodes one of the two redundant sphingoid base hydroxylases (SBH). Involved in sphingolipid trihydroxy long-chain base (4-hydroxysphinganine) biosynthesis. Double mutants of SBHs were dwarfed and not able to progress from vegetative to reproductive growth.
Wa8730a001g011970	-1.31119	5.80397e-64	8.0919e-60	0.415	0.701	AT3G53990		Encodes universal stress protein (USP). Functions as a molecular chaperone under heat shock and oxidative stress conditions. Chaperone activity and assembly into complexes is redox regulated.
Wa8730a015g004730	-1.31151	4.9881e-67	6.95442e-63	0.061	0.398	AT3G28345	ABCB15, MDR13	Encodes an ATP-binding cassette (ABC) transporter. Expressed in the vascular tissue of primary stem.
Wa8730a010g000690	-1.31556	1.18768e-82	1.65587e-78	0.018	0.365	AT4G31800;AT4G22070	ATWRKY18, WRKY18;ATWRKY31, WRKY31	Pathogen-induced transcription factor. Binds W-box sequences in vitro. Forms protein complexes with itself and with WRKY40 and WRKY60. Constitutive expression of WRKY18 enhanced resistance to P. syringae, but its coexpression with WRKY40 or WRKY60 made plants more susceptible to both P. syringae and B. cinerea. WRKY18, WRKY40, and WRKY60 have partially redundant roles in response to the hemibiotr…
Wa8730a007g002110	-1.32148	9.76656e-14	1.36165e-09	0.065	0.175
Wa8730a003g008790	-1.33331	2.32068e-70	3.2355e-66	0.215	0.586	AT5G06440;AT3G11720	;	;Polyketide cyclase/dehydrase and lipid transport superfamily protein
Wa8730a014g002860	-1.35476	2.64752e-85	3.69117e-81	0.09	0.495	AT2G45190;AT1G08465;AT2G26580	AFO, FIL, YAB1;YAB2;YAB5	Encodes a member of the YABBY family of transcriptional regulators that is involved in abaxial cell type specification in leaves and fruits. YAB1 acts in a non-cell autonomous fashion within the meristem to affect phyllotactic patterning. The non-autonomous effect on the central region of the meristem is mediated through the activity if Lateral Suppressor (LAS).;Member of the YABBY family of Arab…
Wa8730a009g003160	-1.40598	1.94928e-91	2.71769e-87	0.136	0.593
Wa8730a020g003020	-1.42929	3.59435e-76	5.01124e-72	0.425	0.751	AT1G24400;AT5G40780;AT1G67640;AT3G01760	AATL2, ATLHT2, LHT2;LHT1;;	High-affinity transporter for neutral and acidic amino acids, expressed in tapetum tissue of anthers;Encodes LHT1 (lysine histidine transporter), a high-affinity transporter for cellular amino acid uptake in both root epidermis and leaf mesophyll.;Transmembrane amino acid transporter family protein;Encodes an amino acid transporter expressed in the root that is involved in the uptake of acidic am…
Wa8730a008g004040	-1.43017	3.42381e-86	4.77348e-82	0.033	0.409	AT4G19960;AT1G31120;AT2G35060	ATKUP9, HAK9, KT9, KUP9;KUP10;KUP11	Encodes a potassium ion transmembrane transporter. Also mediates cesium uptake when expressed in E. coli.;potassium transporter;potassium transporter
Wa8730a003g004980	-1.44605	1.20395e-77	1.67855e-73	0.009	0.328	AT3G51590	LTP12	Encodes a member of the lipid transfer protein family. Proteins of this family are generally small (~9 kD), basic, expressed abundantly and contain eight Cys residues. The proteins can bind fatty acids and acylCoA esters and can transfer several different phospholipids. They are localized to the cell wall. The LTP12 promoter is active exclusively in the tapetum during the uninucleate microspore a…
Wa8730a016g002350	-1.48532	3.82361e-86	5.33087e-82	0.223	0.672	AT1G37130;AT1G77760	ATNR2, B29, CHL3, NIA2, NIA2-1, NR, NR2;GNR1, NIA1, NR1	Identified as a mutant resistant to chlorate. Encodes nitrate reductase structural gene. Involved in nitrate assimilation. Has nitrate reductase activity. Up-regulated by the fungus P. indica. Binds transcription factor At2g35940.;Encodes the cytosolic minor isoform of nitrate reductase (NR). Involved in the first step of nitrate assimilation, it contributes about 15% of the nitrate reductase act…
Wa8730a007g005010	-1.4993	6.32201e-98	8.81414e-94	0.326	0.753	AT1G09400		FMN-linked oxidoreductases superfamily protein
Wa8730a018g002950	-1.50677	1.11782e-81	1.55847e-77	0.389	0.744
Wa8730a001g007820	-1.52232	4.51933e-77	6.30085e-73	0.172	0.558	AT2G18960;AT1G17260;AT5G62670;AT4G30190;AT5G57350;AT2G24520;AT2G07560;AT1G80660	AHA1, HA1, OST2, PMA;AHA10;AHA11, HA11;AHA2, HA2, PMA2;AHA3, ATAHA3, HA3;AHA5, HA5;AHA6, HA6;AHA9, HA9	Encodes a plasma membrane proton ATPase. Mutants have a reduced ability to close their stomata in response to drought and are affected in stomatal but not seed responsiveness to ABA.;belongs to H+-APTase gene family, involved in proanthocyanidin biosynthesis, disturbs the vacuolar biogenesis and acidification process;H(+)-ATPase 11;belongs to the P-type ATPase superfamily of cation-transporting A…
Wa8730a009g003140	-1.5322	1.97972e-97	2.76013e-93	0.055	0.483
Wa8730a016g003520	-1.53545	7.62155e-108	1.0626e-103	0.808	0.929	AT5G37600;AT3G17820;AT5G35630;AT1G66200;AT5G16570;AT1G48470	ATGLN1;1, ATGSR1, GLN1;1, GSR;ATGSKB6, GLN1.3, GLN1;3;ATGSL1, GLN2, GS2;ATGSR2, GLN1;2, GSR2;GLN1;4;GLN1;5	encodes a cytosolic glutamine synthetase, the enzyme has high affinity with substrate ammonium;encodes a cytosolic glutamine synthetase, the enzyme has low affinity with substrate ammonium;chloroplastic glutamine synthetase;encodes a cytosolic glutamate synthetase, this enzyme has low affinity with substrate ammonium;Encodes a cytosolic glutamine synthetase, the enzyme has high affinity with subs…
Wa8730a008g003840	-1.54553	2.39937e-84	3.3452e-80	0.018	0.372	AT4G19690;AT3G12750;AT2G30080;AT1G31260;AT2G32270;AT1G05300;AT2G04032	ATIRT1, IRT1;AtZIP1, ZIP1;ATZIP6, ZIP6;ZIP10;ZIP3;ZIP5;ZIP7	Fe(II) transport protein (IRT1);A member of Zrt- and Irt-related protein (ZIP) family. transcript is induced in response to zinc deficiency in the root.;member of Fe(II) transporter isolog family. Gene expression is not regulated by iron, copper, or zinc deficiency or excess.;member of Fe(II) transporter isolog family;A member of Zrt- and Irt-related protein (ZIP) family. transcript is induced in…
Wa8730a013g004680	-1.55084	2.47171e-100	3.44606e-96	0.042	0.464	AT5G43360;AT2G32830;AT3G54700	ATPT4, PHT1;3, PHT3;PHT1;5, PHT5;PHT1;7	Encodes Pht1;3, a member of the Pht1 family of phosphate transporters which include: Pht1;1/At5g43350, Pht1;2/At5g43370, Pht1;3/At5g43360, Pht1;4/At2g38940, Pht1;5/At2g32830, Pht1;6/At5g43340, Pht1;7/At3g54700, Pht1;8/At1g20860, Pht1;9/At1g76430 (Plant Journal 2002, 31:341).;Encodes Pht1;5, a member of the Pht1 family of phosphate transporters which include: Pht1;1/At5g43350, Pht1;2/At5g43370, Ph…
Wa8730a006g004140	-1.61734	2.19486e-73	3.06007e-69	0.012	0.319	AT2G41480;AT5G64120;AT5G66390;AT1G05260;AT2G22420;AT2G34060;AT3G21770;AT5G15180;AT5G39580;AT1G49570;AT1G14550	AtPRX25, PRX25;AtPRX71, PRX71;PRX72;RCI3, RCI3A;;;;;;;	Encodes a cationic cell-wall-bound peroxidase homolog that is involved in the lignification of cell walls.;encodes a cell wall bound peroxidase that is induced by hypo-osmolarity;Encodes a peroxidase that is involved in lignin biosynthesis.;Encodes a cold-inducible cationic peroxidase that is involved in the stress response. In response to low temperature, RCI3 transcripts accumulate in the aeria…
Wa8730a004g006810	-1.61989	2.72431e-97	3.79823e-93	0.314	0.754	AT5G44130	FLA13	FASCICLIN-like arabinogalactan protein 13 precursor
Wa8730a015g003250	-1.64501	3.90925e-59	5.45028e-55	0.053	0.354	AT3G30842;AT1G15520	ABCG38, ATPDR10, PDR10;ABCG40, ATABCG40, ATPDR12, PDR12	pleiotropic drug resistance 10;ABC transporter family involved in ABA transport and resistance to lead. Localizes to plasma membrane. Upregulated by lead. Expressed in leaves, flowers, stomata and roots.
Wa8730a001g006060	-1.64529	1.28848e-91	1.7964e-87	0.21	0.639	AT3G10960	ATAZG1, AZG1	Encodes a homolog of the adenine-guanine-hypoxanthine transporter AzgA of Aspergillus nidulans. Function as a plant adenine-guanine transporter. Two closely related genes exist in Arabidopsis: AT3G10960 (Azg1) and AT5G50300 (Azg2).
Wa8730a009g003530	-1.65288	1.70122e-114	2.37184e-110	0.997	0.998	AT2G38530	LP2, LTP2, cdf3	Involved in lipid transfer between membranes. Belongs to a family of Lipid transfer proteins. Sequence similarity to other plant/Arabidopsis LPT genes but highest similarity to LPT1. Stress and pathogen-inducible motifs found in the upstream region. Expressed in flower, leaves and siliques but absent in roots. Predicted to be a member of PR-14 pathogenesis-related protein family with the followin…
Wa8730a005g003170	-1.66147	6.32474e-154	8.81795e-150	0.909	0.989	AT1G73190;AT3G16240;AT4G01470;AT2G36830;AT2G25810;AT1G52180	ALPHA-TIP, TIP3;1;AQP1, ATTIP2;1, DELTA-TIP, DELTA-TIP1, TIP2;1;ATTIP1.3, GAMMA-TIP3, TIP1;3;GAMMA-TIP, GAMMA-TIP1, TIP1;1;TIP4;1;	Moves to the Protein Storage Vacuole in a Golgi independent manner;Delta tonoplast intrinsic protein, functions as a water channel and ammonium (NH3) transporter. Highly expressed in flower, shoot, and stem. Expression shows diurnal regulation and is induced by ammonium (NH3). Protein localized to vacuolar membrane.;Encodes AtTIP1;3, functions as water and urea channels in pollen.;Encodes a tonop…
Wa8730a009g003220	-1.66889	1.5942e-97	2.22264e-93	0.059	0.502
Wa8730a020g002990	-1.67742	3.69247e-173	5.14804e-169	0.886	0.985	AT1G13440;AT3G04120;AT1G79530;AT1G16300	GAPC-2, GAPC2;GAPC, GAPC-1, GAPC1;GAPCP-1;GAPCP-2	The expression level of GAPC-2 is upregulated in Arabidopsis seedlings exposed to cadmium.;encodes cytosolic GADPH (C subunit) involved in the glycolytic pathway but also interacts with H2O2 potentially placing it in a signalling cascade induced by ROS.;Encodes one of the chloroplast/plastid localized GAPDH isoforms (GAPCp1/At1g79530 and GAPCp2/At1g16300). gapcp double mutants display a drastic p…
Wa8730a006g004370	-1.70139	5.10638e-91	7.11931e-87	0.089	0.506	AT2G41480;AT5G64120;AT5G66390;AT1G05260;AT2G34060;AT3G21770;AT5G15180;AT5G39580;AT3G03670;AT1G49570	AtPRX25, PRX25;AtPRX71, PRX71;PRX72;RCI3, RCI3A;;;;;;	Encodes a cationic cell-wall-bound peroxidase homolog that is involved in the lignification of cell walls.;encodes a cell wall bound peroxidase that is induced by hypo-osmolarity;Encodes a peroxidase that is involved in lignin biosynthesis.;Encodes a cold-inducible cationic peroxidase that is involved in the stress response. In response to low temperature, RCI3 transcripts accumulate in the aeria…
Wa8730a002g001530	-1.71016	4.64005e-124	6.46916e-120	0.451	0.876	AT4G24130		Protein of unknown function, DUF538
Wa8730a003g001330	-1.71257	1.27722e-72	1.7807e-68	0.086	0.462	AT4G37850;AT2G22750	;	basic helix-loop-helix (bHLH) DNA-binding superfamily protein;basic helix-loop-helix (bHLH) DNA-binding superfamily protein
Wa8730a005g001430	-1.72253	1.35703e-121	1.89197e-117	0.052	0.556	AT1G13140;AT4G39490;AT5G02900;AT4G32170;AT5G52320;AT2G21910;AT1G47620	CYP86C3;CYP96A10;CYP96A13;CYP96A2;CYP96A4;CYP96A5;CYP96A8	member of CYP86C;member of CYP96A;member of CYP96A;member of CYP96A;member of CYP96A;member of CYP96A;member of CYP96A
Wa8730a011g003440	-1.73872	2.23566e-90	3.11696e-86	0.156	0.584	AT1G30270	ATCIPK23, CIPK23, LKS1, PKS17, SnRK3.23	Arabidopsis thaliana CBL-interacting protein kinase 23. CIPK23 serves as a positive regulator of the potassium transporter AKT1 by directly phosphorylating AKT1. CIPK23 is activated by the binding of two calcineurin B-like proteins, CBL1 and CBL9.
Wa8730a004g003310	-1.743	2.67747e-123	3.73293e-119	0.028	0.51
Wa8730a003g001030	-1.86878	4.25695e-107	5.93505e-103	0.368	0.797	AT2G16060	AHB1, ARATH, ATGLB1, GLB1, HB1, NSHB1	Encodes a class 1 nonsymbiotic hemoglobin induced by low oxygen levels with very high oxygen affinity. It is not likely to be a hemoglobin transporter because of its extremely high affinity for oxygen.
Wa8730a009g001780	-1.89814	3.84058e-119	5.35454e-115	0.044	0.531	AT3G63110;AT5G19040;AT3G23630	ATIPT3, IPT3;ATIPT5, IPT5;ATIPT7, IPT7	Encodes cytokinin synthase involved in cytokinin biosynthesis. IPT3 subcellular localization is modulated by farnesylation- when farnesylated it is localized to the nucleus, otherwise to the chloroplast.;Encodes cytokinin synthase.;Encodes an isopentenyl transferase involved in cytokinin biosynthesis.
Wa8730a003g000980	-1.9419	9.49431e-134	1.3237e-129	0.377	0.842	AT2G22860;AT3G49780;AT4G37720	ATPSK2, PSK2;ATPSK3, ATPSK4, PSK4;ATPSK6, PSK6	Phytosulfokine 2 precursor, coding for a unique plant peptide growth factor.;Phytosulfokine 3 precursor, coding for a unique plant peptide growth factor. Plants overexpressing this gene (under a 35S promoter), develop normal cotyledons and hypocotyls but their growth, in particular that of their roots, was faster than that of wildtype.;Probable phytosulfokines 6 precursor, coding for a unique pla…
Wa8730a013g004170	-1.97294	1.29202e-106	1.80134e-102	0.097	0.557	AT1G17860		Kunitz family trypsin and protease inhibitor protein
Wa8730a017g002540	-1.97976	3.86486e-122	5.38839e-118	0.376	0.811	AT2G45960;AT3G61430;AT1G01620;AT4G00430;AT4G23400;AT2G37170;AT2G39010;AT4G35100;AT2G16850	ATHH2, PIP1;2, PIP1B, TMP-A;ATPIP1, PIP1, PIP1;1, PIP1A;PIP1;3, PIP1C, TMP-B;PIP1;4, PIP1E, TMP-C;PIP1;5, PIP1D;PIP2;2, PIP2B;PIP2;6, PIP2E;PIP2;7, PIP3, PIP3A, SIMIP;PIP2;8, PIP3B	a member of the plasma membrane intrinsic protein subfamily PIP1. localizes to the plasma membrane and exhibits water transport activity in Xenopus oocyte. expressed ubiquitously and protein level decreases slightly during leaf development.;a member of the plasma membrane intrinsic protein subfamily PIP1. localizes to the plasma membrane and exhibits water transport activity in Xenopus oocyte. ex…
Wa8730a013g001900	-2.06171	1.80803e-113	2.52075e-109	0.016	0.462	AT4G12310;AT2G45570;AT2G46660;AT1G01190	CYP706A5;CYP76C2;CYP78A6, EOD3;CYP78A8	member of CYP706A;member of CYP76C;member of CYP78A;member of CYP78A
Wa8730a016g002860	-2.09026	1.3614e-165	1.89807e-161	0.226	0.847	AT1G68610;AT3G18470;AT1G49030	PCR11;;	Target promoter of the male germline-specific transcription factor DUO1.;PLAC8 family protein;PLAC8 family protein
Wa8730a001g011180	-2.13374	3.33603e-149	4.65109e-145	0.18	0.749	AT5G02540;AT2G37540;AT4G11410	;;	NAD(P)-binding Rossmann-fold superfamily protein;NAD(P)-binding Rossmann-fold superfamily protein;NAD(P)-binding Rossmann-fold superfamily protein
Wa8730a014g002160	-2.16387	2.11721e-138	2.95182e-134	0.034	0.571
Wa8730a004g001070	-2.1925	2.00435e-145	2.79446e-141	0.382	0.855	AT5G60770;AT1G12940	ATNRT2.4, NRT2.4;ATNRT2.5, NRT2.5	member of High affinity nitrate transporter family;member of High affinity nitrate transporter family
Wa8730a006g002120	-2.20301	4.86743e-188	6.78617e-184	0.774	0.973	AT5G50200;AT4G24715	ATNRT3.1, NRT3.1, WR3;NA	Wound-responsive gene 3 (WR3). Encodes a high-affinity nitrate transporter. Up-regulated by nitrate. Involved in jasmonic acid-independent wound signal transduction.;NA
Wa8730a020g000810	-2.23581	3.48133e-91	4.85367e-87	0.036	0.423	AT3G52720;AT2G28210;AT5G04180;AT1G08080	ACA1, ATACA1, CAH1;ACA2, ATACA2;ACA3, ATACA3;ACA7, ATACA7	Encodes a putative alpha carbonic anhydrase (CAH1) located in the chloroplast stroma. Most chloroplast proteins are encoded by the nuclear genome and imported with the help of sorting signals that are intrinsic parts of the polypeptides. CAH1 takes an alternative route through the secretory pathway, and becomes N-glycosylated before entering the chloroplast.;alpha carbonic anhydrase 2;alpha carbo…
Wa8730a007g008670	-2.41673	1.47625e-139	2.05818e-135	0.233	0.768	AT3G29260;AT4G03140	;	NAD(P)-binding Rossmann-fold superfamily protein;NAD(P)-binding Rossmann-fold superfamily protein
Wa8730a014g002180	-2.57284	4.09758e-186	5.71284e-182	0.068	0.742
Wa8730a003g005380	-2.72132	9.58984e-116	1.33702e-111	0.082	0.567	AT3G46860;AT5G43570	;	Predicted to encode a PR (pathogenesis-related) peptide that belongs to the PR-6 proteinase inhibitor family. Six putative PR-6-type protein encoding genes are found in Arabidopsis: At2g38900, At2g38870, At5g43570, At5g43580, At3g50020 and At3g46860.;Predicted to encode a PR (pathogenesis-related) peptide that belongs to the PR-6 proteinase inhibitor family. Six putative PR-6-type protein encodin…
Wa8730a001g000280	-2.74535	9.71623e-201	1.35464e-196	0.077	0.779	AT3G12500;AT4G01700;AT1G02360	ATHCHIB, B-CHI, CHI-B, HCHIB, PR-3, PR3;;	encodes a basic chitinase involved in ethylene/jasmonic acid mediated signalling pathway during systemic acquired resistance based on expression analyses.;Chitinase family protein;Chitinase family protein
Wa8730a001g007090	-2.7514	6.65513e-98	9.27859e-94	0.054	0.474	AT2G41480;AT5G05340	AtPRX25, PRX25;PRX52	Encodes a cationic cell-wall-bound peroxidase homolog that is involved in the lignification of cell walls.;Encodes a protein with sequence similarity to peroxidases that is involved in lignin biosynthesis. Loss of function mutations show abnormal development of xylem fibers and reduced levels of lignin biosynthetic enxymes.
Wa8730a001g006770	-2.76485	1.61936e-112	2.25771e-108	0.07	0.538
Wa8730a015g000910	-2.98469	6.54366e-115	9.12317e-111	0.061	0.535	AT4G31500;AT5G07990	ATR4, CYP83B1, RED1, RNT1, SUR2;CYP75B1, D501, TT7	Encodes an oxime-metabolizing enzyme in the biosynthetic pathway of glucosinolates. Is required for phytochrome signal transduction in red light. Mutation confers auxin overproduction.;Required for flavonoid 3' hydroxylase activity.
Wa8730a014g002170	-3.00259	2.60401e-230	3.63051e-226	0.089	0.866
Wa8730a008g001340	-3.06075	4.75851e-131	6.63432e-127	0.238	0.751
Wa8730a012g004900	-3.20109	2.73783e-213	3.81709e-209	0.039	0.754	AT5G10180;AT1G78000;AT4G08620;AT1G22150	AST68, SULTR2;1;SEL1, SULTR1;2;SULTR1;1;SULTR1;3	Encodes a low-affinity sulfate transporter expressed in the root cap and central cylinder, where it is induced by sulfur starvation. Expression in the shoot vascular system is not induced by sulfur starvation.;Encodes a sulfate transporter that can restore sulfate uptake capacity of a yeast mutant lacking sulfate transporter genes.;Encodes a sulfate transporter. Contains STAS domain. Expressed in…
Wa8730a008g000620	-3.61054	5.32773e-236	7.42793e-232	0.354	0.964
Wa8730a008g001000	-3.74941	1.67371e-229	2.33349e-225	0.157	0.88
Wa8730a003g005480	-4.50787	3.16225e-244	4.4088e-240	0.436	0.958

## Sheet: SC B vs SC D
Dataset S3. Differentially Expressed Genes for Dusk Supercluster B vs Supercluster D
Genes showing significant differential expression (log2FC>1 & p_val_adj <0.05 & PCT1 > 10%) in the given supercluster versus all other cells in the dataset
PCT1: Percentage of cells within the Supercluster expressing the gene
PCT2: Percentage of cells outside the Supercluster expressing the gene
Gene	Ave. Log2 FC	p Value	p Value Adj.	PCT1	PCT2	Arabidopsis orthologues	Arabidopsis gene names	Arabidopsis gene description
Wa8730a010g004750	3.64596	2.56927e-45	3.58208e-41	0.366	0.055	AT4G09600;AT1G10588	GASA3;	One of GASA gene family which is related to a GA-stimulated transcript (GAST) from tomato.;Encodes a Gibberellin-regulated GASA/GAST/Snakin family protein
Wa8730a010g002220	3.14757	2.34751e-58	3.2729e-54	0.512	0.12	AT5G53880
Wa8730a006g002770	2.72595	8.38547e-17	1.1691e-12	0.292	0.12	AT1G22450	ATCOX6B2, COX6B	subunit 6b of cytochrome c oxidase
Wa8730a010g004730	2.41591	3.6383e-33	5.07252e-29	0.311	0.06	AT4G09600;AT1G10588	GASA3;	One of GASA gene family which is related to a GA-stimulated transcript (GAST) from tomato.;Encodes a Gibberellin-regulated GASA/GAST/Snakin family protein
Wa8730a005g003250	2.15162	1.88474e-48	2.62771e-44	0.499	0.145	AT1G73190;AT3G16240;AT4G01470;AT2G36830;AT2G25810;AT1G52180	ALPHA-TIP, TIP3;1;AQP1, ATTIP2;1, DELTA-TIP, DELTA-TIP1, TIP2;1;ATTIP1.3, GAMMA-TIP3, TIP1;3;GAMMA-TIP, GAMMA-TIP1, TIP1;1;TIP4;1;	Moves to the Protein Storage Vacuole in a Golgi independent manner;Delta tonoplast intrinsic protein, functions as a water channel and ammonium (NH3) transporter. Highly expressed in flower, shoot, and stem. Expression shows diurnal regulation and is induced by ammonium (NH3). Protein localized to vacuolar membrane.;Encodes AtTIP1;3, functions as water and urea channels in pollen.;Encodes a tonop…
Wa8730a014g000600	1.91503	6.75444e-38	9.41704e-34	0.417	0.116
Wa8730a008g004210	1.68296	2.8398e-26	3.95926e-22	0.605	0.37	AT4G21960	PRXR1	Encodes AT4g21960 (AT4g21960/T8O5_170).
Wa8730a013g004500	1.63127	3.38662e-48	4.72162e-44	0.514	0.157	AT5G62700;AT5G44340;AT5G23860	TUB3;TUB4;TUB8	encodes tubulin beta-2/beta-3 chain;beta tubulin gene;beta-tubulin, preferentially expressed in endodermal and phloem cells of primary roots and in the vascular tissues of leaves, stems, and flowers.
Wa8730a010g004740	1.58803	1.8919e-26	2.63769e-22	0.185	0.008	AT4G09600;AT1G10588	GASA3;	One of GASA gene family which is related to a GA-stimulated transcript (GAST) from tomato.;Encodes a Gibberellin-regulated GASA/GAST/Snakin family protein
Wa8730a009g000730	1.54382	2.1655e-28	3.01914e-24	0.644	0.414	AT3G46010;AT5G59890;AT4G00680	ADF1, ATADF1, atadf;ADF4, ATADF4;ADF8	Actin-depolymerizing factor (ADF) and cofilin define a family of actin-binding proteins essential for the rapid turnover of filamentous actin in vivo.;actin depolymerizing factor 4 (ADF4) mRNA, complete cds;actin depolymerizing factor 8
Wa8730a005g004040	1.5027	1.45113e-32	2.02317e-28	0.654	0.38	AT2G46330;AT3G61640;AT5G53250	AGP16, ATAGP16;AGP20, AtAGP20;AGP22, ATAGP22	Encodes arabinogalactan protein (AGP16).;arabinogalactan protein 20;arabinogalactan protein 22
Wa8730a017g001190	1.49142	7.38203e-66	1.0292e-61	0.92	0.706
Wa8730a001g012480	1.46043	2.17832e-49	3.03701e-45	0.951	0.872	AT2G45960;AT3G53420;AT2G37180;AT5G60660;AT2G39010;AT4G35100	ATHH2, PIP1;2, PIP1B, TMP-A;AtPIP2;1, PIP2, PIP2;1, PIP2A;PIP2;3, PIP2C, RD28;PIP2;4, PIP2F;PIP2;6, PIP2E;PIP2;7, PIP3, PIP3A, SIMIP	a member of the plasma membrane intrinsic protein subfamily PIP1. localizes to the plasma membrane and exhibits water transport activity in Xenopus oocyte. expressed ubiquitously and protein level decreases slightly during leaf development.;a member of the plasma membrane intrinsic protein subfamily PIP2. localizes to the plasma membrane and exhibits water transport activity in Xenopus oocyte. ex…
Wa8730a009g005910	1.37767	1.23193e-67	1.71756e-63	0.921	0.775	AT5G54270	LHCB3, LHCB3*1	Lhcb3 protein is a component of the main light harvesting chlorophyll a/b-protein complex of Photosystem II (LHC II).
Wa8730a012g004780	1.32756	1.7855e-31	2.48935e-27	0.862	0.714	AT4G39730;AT2G22170;AT5G65158	PLAT1;PLAT2;PLAT3	Lipase/lipooxygenase, PLAT/LH2 family protein;Lipase/lipooxygenase, PLAT/LH2 family protein;Lipase/lipooxygenase, PLAT/LH2 family protein
Wa8730a006g005790	1.311	4.60838e-40	6.425e-36	0.762	0.507	AT1G15820	CP24, LHCB6	Lhcb6 protein (Lhcb6), light harvesting complex of photosystem II.
Wa8730a005g005360	1.29139	5.28876e-49	7.37359e-45	0.866	0.653	AT4G20260	ATPCAP1, MDP25, PCAP1	Encodes a Ca2+ and Cu2+ binding protein. N-terminal myristylation on glycine 2 appears to enable it to associate tightly with the plasma membrane. Recombinant PCaP1 interacts strongly with phosphatidylinositol 3,5-bisphosphate (PtdIns(3,5)P2) and PtdIns (3,4,5)P3, and weakly with PtdIns(3,5)P2 and PtdIns(4,5). It also interacts with calmodulin (CaM) in a calcium-dependent manner. CaM does not int…
Wa8730a017g003860	1.27826	2.10142e-40	2.92979e-36	0.783	0.559	AT1G29930;AT5G54270	AB140, CAB1, CAB140, LHCB1.3;LHCB3, LHCB3*1	Subunit of light-harvesting complex II (LHCII),which absorbs light and transfers energy to the photosynthetic reaction center.;Lhcb3 protein is a component of the main light harvesting chlorophyll a/b-protein complex of Photosystem II (LHC II).
Wa8730a004g004970	1.27424	6.88706e-27	9.60194e-23	0.473	0.207	AT1G29920;AT2G34430;AT1G61520;AT3G27690;AT5G54270	AB165, CAB2, LHCB1.1;LHB1B1, LHCB1.4;LHCA3;LHCB2, LHCB2.3, LHCB2.4;LHCB3, LHCB3*1	Encodes lhcb1.1 a component of the LHCIIb light harvesting complex associated with photosystem II.;Photosystem II type I chlorophyll a/b-binding protein;PSI type III chlorophyll a/b-binding protein (Lhca3*1);Encodes Lhcb2.4. Belongs to the Lhc super-gene family encodes the light-harvesting chlorophyll a/b-binding (LHC) proteins that constitute the antenna system of the photosynthetic apparatus.;L…
Wa8730a003g000890	1.27263	4.67945e-18	6.52409e-14	0.249	0.078	AT2G14580;AT3G19690;AT4G33720;AT1G50060;AT5G57625;AT4G31470;AT4G30320	ATPRB1, PRB1;;;;;;	pathogenesis related protein, encodes a basic PR1-like protein. Expresses in flowers, roots, and not in leaves and responses to ethylene and methyl jasmonate. Salicylic acid represses gene expression.;CAP (Cysteine-rich secretory proteins, Antigen 5, and Pathogenesis-related 1 protein) superfamily protein;CAP (Cysteine-rich secretory proteins, Antigen 5, and Pathogenesis-related 1 protein) superf…
Wa8730a020g000340	1.26025	1.15945e-12	1.61651e-08	0.594	0.475
Wa8730a006g002040	1.21899	1.93321e-26	2.69528e-22	0.549	0.284	AT3G26650;AT1G13440;AT1G79530;AT1G16300	GAPA, GAPA-1;GAPC-2, GAPC2;GAPCP-1;GAPCP-2	Encodes one of the two subunits forming the photosynthetic glyceraldehyde-3-phosphate dehydrogenase (GAPDH) and as such a constituent of the supramolecular complex with phosphoribulokinase (PRK) thought to be linked by a small peptide encoded by CP12-2. GapA-1 is coordinately expressed by light with PRK and CP12-2. The enzyme activity, tested in leaf protein extracts dropped significantly after e…
Wa8730a013g005950	1.21703	3.55302e-35	4.95361e-31	0.628	0.318	AT3G53420;AT1G01620;AT4G00430;AT2G37170;AT3G54820	AtPIP2;1, PIP2, PIP2;1, PIP2A;PIP1;3, PIP1C, TMP-B;PIP1;4, PIP1E, TMP-C;PIP2;2, PIP2B;PIP2;5, PIP2D	a member of the plasma membrane intrinsic protein subfamily PIP2. localizes to the plasma membrane and exhibits water transport activity in Xenopus oocyte. expressed specifically in the vascular bundles and protein level increases slightly during leaf dev. When expressed in yeast cells can conduct hydrogen peroxide into those cells.;a member of the plasma membrane intrinsic protein subfamily PIP1…
Wa8730a009g004140	1.21682	9.74011e-26	1.35797e-21	0.305	0.079	AT5G16730;AT3G05900	;	Encodes a microtubule-associated protein. The mRNA is cell-to-cell mobile.;neurofilament protein-related
Wa8730a017g001210	1.17769	2.41822e-28	3.37148e-24	0.568	0.292
Wa8730a004g001700	1.15632	6.09782e-22	8.50158e-18	0.736	0.561	AT5G60490;AT5G44130;AT2G20520	AtFLA12, FLA12;FLA13;FLA6	Encodes a member of fasciclin-like arabinogalactan proteins (FLAs) containing a cell adhesion fasciclin (FAS) domain. Mutations result in altered stem biomechanics with reduced tensile strength and reduced tensile modulus of elasticity, as well as altered cell wall architecture and composition, with increased cellulose microfibril angle, reduced arabinose, galactose and cellulose content.;FASCICL…
Wa8730a008g005160	1.14179	7.75073e-27	1.08061e-22	0.358	0.11	AT4G37800;AT1G11545;AT4G03210	XTH7;XTH8;XTH9	xyloglucan endotransglucosylase/hydrolase 7;xyloglucan endotransglucosylase/hydrolase 8;encodes a member of xyloglucan endotransglucosylase/hydrolases (XTHs) that catalyze the cleavage and molecular grafting of xyloglucan chains function in loosening and rearrangement of the cell wall. Gene is expressed in shoot apex region, flower buds, flower stalks and internodes bearing flowers.
Wa8730a013g005830	1.11905	5.60288e-37	7.81153e-33	0.73	0.43	AT1G04410	c-NAD-MDH1	predicted to encode a cytosolic malate dehydrogenase.
Wa8730a001g011970	1.08022	1.63178e-14	2.27502e-10	0.407	0.223	AT3G53990		Encodes universal stress protein (USP). Functions as a molecular chaperone under heat shock and oxidative stress conditions. Chaperone activity and assembly into complexes is redox regulated.
Wa8730a005g003780	1.07674	7.17585e-10	1.00046e-05	0.184	0.073	AT4G23630;AT4G11220;AT5G41600;AT1G64090;AT4G01230;AT2G46170;AT3G61560	BTI1, RTNLB1;BTI2, RTNLB2;BTI3, RTNLB4;RTNLB3;;;	VIRB2-interacting protein 1;VIRB2-interacting protein 2;VIRB2-interacting protein 3;Reticulan like protein B3;Reticulon family protein;Reticulon family protein;Reticulon family protein
Wa8730a013g004640	1.0604	2.4872e-18	3.46765e-14	0.347	0.147	AT3G09840;AT3G53230;AT5G03340;AT3G54830	ATCDC48, CDC48, CDC48A;AtCDC48B;AtCDC48C;	Encodes a cell division cycle protein, a member of AAA-type ATPases gene family. Expressed throughout the plant in regions of cell division. Within the cell, sub-cellular localization varies depending on the stage of the cell cycle.Mutants in which the expression of CDC48A is altered show defects in cytokinesis, cell expansion and cell differentiation.;CDC48 is induced upon oilseed rape mosaic to…
Wa8730a020g002990	1.05066	2.20967e-26	3.08072e-22	0.846	0.695	AT1G13440;AT3G04120;AT1G79530;AT1G16300	GAPC-2, GAPC2;GAPC, GAPC-1, GAPC1;GAPCP-1;GAPCP-2	The expression level of GAPC-2 is upregulated in Arabidopsis seedlings exposed to cadmium.;encodes cytosolic GADPH (C subunit) involved in the glycolytic pathway but also interacts with H2O2 potentially placing it in a signalling cascade induced by ROS.;Encodes one of the chloroplast/plastid localized GAPDH isoforms (GAPCp1/At1g79530 and GAPCp2/At1g16300). gapcp double mutants display a drastic p…
Wa8730a006g001200	1.04996	6.90935e-20	9.63301e-16	0.465	0.246	AT3G22120;AT4G15160;AT1G62500	CWLP;;	cell wall-plasma membrane linker protein homolog (CWLP);Bifunctional inhibitor/lipid-transfer protein/seed storage 2S albumin superfamily protein;Bifunctional inhibitor/lipid-transfer protein/seed storage 2S albumin superfamily protein
Wa8730a012g004800	1.04735	8.08053e-19	1.12659e-14	0.452	0.233	AT4G08685;AT1G78040	SAH7;	Encodes a protein, expressed in leaves, with similarity to pollen allergens.;Pollen Ole e 1 allergen and extensin family protein
Wa8730a018g002280	1.04204	7.98243e-29	1.11291e-24	0.635	0.367	AT2G47400;AT3G62410	CP12, CP12-1;CP12, CP12-2	CP12-1 encodes a small peptide found in the chloroplast stroma. It belongs to the CP12 gene family thought to be involved in the formation of a supramolecular complex with glyceraldehyde-3-phosphate dehydrogenase (GAPDH) and phosphoribulokinase (PRK) embedded in the Calvin cycle.;CP12-2 encodes a small peptide found in the chloroplast stroma. It belongs to the CP12 gene family thought to be invol…
Wa8730a001g008310	1.02716	2.50085e-34	3.48668e-30	0.831	0.661	AT1G15820	CP24, LHCB6	Lhcb6 protein (Lhcb6), light harvesting complex of photosystem II.
Wa8730a005g003920	1.02043	3.70423e-31	5.16443e-27	0.698	0.422	AT4G11150;AT1G64200	TUF, TUFF, VHA-E1, emb2448;VHA-E3	Encodes a vacuolar H+-ATPase subunit E isoform 1 which is required for Golgi organization and vacuole function in embryogenesis.;vacuolar H+-ATPase subunit E isoform 3
Wa8730a007g000790	1.01682	1.6385e-19	2.2844e-15	0.693	0.499
Wa8730a010g004460	-1.00266	1.36291e-16	1.90017e-12	0.219	0.396	AT5G42380;AT1G76650	CML37;CML38	calmodulin like 37;calmodulin-like 38
Wa8730a014g001710	-1.00543	8.20037e-25	1.1433e-20	0.011	0.163	AT5G59490;AT3G62040	;	Haloacid dehalogenase-like hydrolase (HAD) superfamily protein;Haloacid dehalogenase-like hydrolase (HAD) superfamily protein
Wa8730a006g000980	-1.00969	2.04881e-13	2.85645e-09	0.373	0.514	AT3G22120;AT4G15160;AT1G62500	CWLP;;	cell wall-plasma membrane linker protein homolog (CWLP);Bifunctional inhibitor/lipid-transfer protein/seed storage 2S albumin superfamily protein;Bifunctional inhibitor/lipid-transfer protein/seed storage 2S albumin superfamily protein
Wa8730a004g005870	-1.01405	1.58458e-24	2.20922e-20	0.095	0.312	AT1G68670;AT4G37180;AT1G25550	;;	HHO2 is a HRS1 homolog. Induced in roots by low Pi and is likely involved in maintaining phosphate homeostasis. It is target of PHR1.;myb family transcription factor, contains Pfam domain, PF00249: Myb-like DNA-binding domain l; also isolated as a putative cytoskeletal protein in a yeast screen;myb-like transcription factor family protein
Wa8730a017g003320	-1.01785	3.17609e-19	4.4281e-15	0.139	0.33	AT5G53750		CBS domain-containing protein
Wa8730a015g000740	-1.01941	6.69673e-18	9.33658e-14	0.123	0.3	AT4G31550;AT2G24570	ATWRKY11, WRKY11;ATWRKY17, WRKY17	member of WRKY Transcription Factor; Group II-d; negative regulator of basal resistance to Pseudomonas syringae.;member of WRKY Transcription Factor; Group II-d; negative regulator of basal resistance to Pseudomonas syringae.
Wa8730a007g003310	-1.02122	4.96052e-15	6.91596e-11	0.191	0.359	AT1G74110	CYP78A10	member of CYP78A
Wa8730a015g004340	-1.02752	2.93204e-26	4.08785e-22	0.027	0.205	AT1G10560;AT1G60190;AT3G07360;AT1G49780;AT3G01400;AT4G12710	ATPUB18, PUB18;AtPUB19, PUB19;ATPUB9, PUB9;PUB26;;	Encodes a protein containing a UND, a U-box, and an ARM domain. This protein has E3 ubiquitin ligase activity based on in vitro assays.;Encodes PUB19, a plant U-box armadillo repeat protein. Involved in salt inhibition of germination together with PUB18. The mRNA is cell-to-cell mobile.;Encodes a protein containing a U-box and an ARM domain. This protein has E3 ubiquitin ligase activity based on …
Wa8730a006g000510	-1.03064	1.43485e-25	2.00047e-21	0.127	0.357	AT3G15210;AT3G20310;AT1G12980	ATERF-4, ATERF4, ERF4, RAP2.5;ATERF-7, ATERF7, ERF7;DRN, ESR1	Encodes a member of the ERF (ethylene response factor) subfamily B-1 of ERF/AP2 transcription factor family (ATERF-4). The protein contains one AP2 domain. Acts as a negative regulator of JA-responsive defense gene expression and resistance to the necrotrophic fungal pathogen Fusarium oxysporum and antagonizes JA inhibition of root elongation.;Encodes a member of the ERF (ethylene response factor…
Wa8730a014g004040	-1.03316	6.58824e-15	9.18532e-11	0.143	0.305	AT5G15730;AT4G00300;AT2G28970;AT5G24010	AtCRLK2, CRLK2;;;	Protein kinase superfamily protein;AT4G00300 has been split into two loci based on new cDNA evidence provided by Aleksander Riise Hansen of University of Copenhagen: AT4G00300.2 becomes AT4G00300.1; a new locus AT4G00295 is created. See comments field for AT4G00295 annotation.;Leucine-rich repeat protein kinase family protein;Protein kinase superfamily protein
Wa8730a011g005220	-1.034	8.99221e-21	1.25369e-16	0.553	0.69	AT2G25090;AT4G30960;AT5G58380;AT5G45820;AT5G25110;AT5G10930	AtCIPK16, CIPK16, SnRK3.18;ATCIPK6, CIPK6, SIP3, SNRK3.14;CIPK10, PKS2, SIP1, SNRK3.8;CIPK20, PKS18, SnRK3.6;CIPK25, SnRK3.25;CIPK5, SnRK3.24	Encodes a member of the SNF1-related kinase (SnRK) gene family (SnRK3.18), which has also been reported as a member of the CBL-interacting protein kinases (CIPK16).;Encodes CBL-interacting protein kinase 6 (CIPK6). Required for development and salt tolerance.;Encodes a CBL-interacting protein kinase with similarity to SOS protein kinase.;Encodes a CBL-interacting serine/threonine protein kinase c…
Wa8730a005g006560	-1.03869	3.1422e-23	4.38086e-19	0.059	0.244
Wa8730a007g008470	-1.04102	1.31806e-10	1.83764e-06	0.285	0.415	AT5G42100;AT2G27500;AT4G34480;AT4G18340;AT2G16230	ATBG_PPAP, BG_PPAP;;;;	encodes a plasmodesmal (Pd)-associated membrane protein involved in plasmodesmal callose degradation, i.e. beta-1,3-glucanase (EC 3.2.1.39), and functions in the gating of Pd;Glycosyl hydrolase superfamily protein;O-Glycosyl hydrolases family 17 protein;Glycosyl hydrolase superfamily protein;O-Glycosyl hydrolases family 17 protein
Wa8730a018g000340	-1.04864	8.39502e-16	1.17043e-11	0.127	0.288	AT5G59570;AT3G46640;AT3G10760	BOA;LUX, PCL1;	Encodes BOA (BROTHER OF LUX ARRHYTHMO), a component of the circadian clock. The mRNA is cell-to-cell mobile.;Encodes a myb family transcription factor with a single Myb DNA-binding domain (type SHAQKYF) that is unique to plants and is essential for circadian rhythms, specifically for transcriptional regulation within the circadian clock. LUX is required for normal rhythmic expression of multiple …
Wa8730a011g005690	-1.04896	3.2984e-14	4.59863e-10	0.069	0.207
Wa8730a014g001270	-1.04959	1.26065e-17	1.75759e-13	0.266	0.452	AT1G27350		Ribosome associated membrane protein RAMP4
Wa8730a018g002050	-1.05685	3.84895e-21	5.36621e-17	0.083	0.267	AT2G40950;AT3G10800;AT3G56660	BZIP17;BZIP28;BZIP49	bZIP17 appears to regulate transcription as part of a salt and osmotic stress response. zip17 mutants show enhanced inhibition of primary root elongation in response to NaCl. Several salt-responsive genes, such as ATHB-7 show a reduced transcriptional response to a salt treatment in zip17 mutant seedlings. myc:bZIP17 undergoes proteolytic processing in salt-treated wild type seedlings, but not in…
Wa8730a007g002590	-1.06105	2.5586e-16	3.5672e-12	0.172	0.344	AT3G25160		ER lumen protein retaining receptor family protein
Wa8730a004g008550	-1.06332	1.38453e-07	0.00193031	0.101	0.194	AT3G16340;AT2G26910;AT1G15520	ABCG29, ATPDR1, AtABCG29, PDR1;ABCG32, ATPDR4, AtABCG32, PDR4, PEC1;ABCG40, ATABCG40, ATPDR12, PDR12	Encodes a p-coumaryl alcohol exporter involved in lignin biosynthesis.;Encodes a member of the PLEIOTROPIC DRUG RESISTANCE family of ATP binding cassette transporters. Required for the formation of a functional cuticle.;ABC transporter family involved in ABA transport and resistance to lead. Localizes to plasma membrane. Upregulated by lead. Expressed in leaves, flowers, stomata and roots.
Wa8730a015g004620	-1.0648	1.22772e-09	1.71169e-05	0.147	0.262
Wa8730a019g000700	-1.07306	2.05807e-18	2.86936e-14	0.041	0.187	AT5G59820;AT2G37430;AT2G28710;AT1G02030;AT5G03510;AT3G46070;AT3G53600	AtZAT12, RHL41, ZAT12;ZAT11;;;;;	Encodes a zinc finger protein involved in high light and cold acclimation. Overexpression of this putative transcription factor increases the expression level of 9 cold-responsive genes and represses the expression level of 15 cold-responsive genes, including CBF genes. Also, lines overexpressing this gene exhibits a small but reproducible increase in freeze tolerance. Because of the repression o…
Wa8730a004g005080	-1.07396	2.03338e-18	2.83494e-14	0.101	0.276	AT4G05070		Wound-responsive family protein
Wa8730a008g000930	-1.07554	1.46933e-15	2.04854e-11	0.087	0.237	AT5G44240	ALA2	Expression is upregulated in the shoot of cax1/cax3 mutant. The mRNA is cell-to-cell mobile.
Wa8730a002g003960	-1.07879	1.57039e-15	2.18944e-11	0.044	0.173	AT5G37690;AT5G41890;AT1G75890	;;	SGNH hydrolase-type esterase superfamily protein;GDSL-motif esterase/acyltransferase/lipase. Enzyme group with broad substrate specificity that may catalyze acyltransfer or hydrolase reactions with lipid and non-lipid substrates.;GDSL-motif esterase/acyltransferase/lipase. Enzyme group with broad substrate specificity that may catalyze acyltransfer or hydrolase reactions with lipid and non-lipid …
Wa8730a008g004320	-1.08192	1.35282e-16	1.88611e-12	0.281	0.447	AT4G04610;AT1G62180;AT4G21990	APR, APR1, ATAPR1, PRH19;APR2, APSR, ATAPR2, PRH, PRH43;APR3, ATAPR3, PRH-26, PRH26	Encodes a protein disulfide isomerase-like (PDIL) protein, a member of a multigene family within the thioredoxin (TRX) superfamily. This protein also belongs to the adenosine 5'-phosphosulfate reductase-like (APRL) group.;encodes a adenosine 5'-phosphosulfate reductase, involved in sulfate assimilation. Is a major effect locus for natural variation of shoot sulfate content in Arabidopsis.;Encodes…
Wa8730a009g001030	-1.09106	6.65685e-24	9.28099e-20	0.063	0.254	AT2G40180;AT5G59220;AT2G30020;AT1G07160	ATHPP2C5, PP2C5;HAI1, SAG113;;	Encodes PP2C5, a member of the PP2C family phosphatases. PP2C5 acts as a MAPK phosphatase that positively regulates seed germination, stomatal closure and ABA-inducible gene expression.;Encodes a member of the PP2C family (Clade A protein phosphatases type 2C). Functions as a negative regulator of osmotic stress and ABA signaling.;Encodes AP2C1. Belongs to the clade B of the PP2C-superfamily. Act…
Wa8730a009g004010	-1.09226	3.55531e-22	4.95681e-18	0.381	0.577	AT2G47260;AT5G49520;AT3G62340;AT5G13080	ATWRKY23, WRKY23;ATWRKY48, WRKY48;AtWRKY68, WRKY68;ATWRKY75, WRKY75	Encodes a member of WRKY Transcription Factor; Group I. Involved in nematode feeding site establishment.;Encodes WRKY48, a member of the WRKY Transcription Factor. WRKY48 is a stress- and pathogen-induced transcriptional activator that represses plant basal defense.;member of WRKY Transcription Factor; Group II-c;WRKY75 is one of several transcription factors induced during Pi deprivation. It is …
Wa8730a010g004760	-1.09516	1.75648e-11	2.44889e-07	0.099	0.221
Wa8730a017g000010	-1.09784	8.16908e-21	1.13893e-16	0.342	0.535
Wa8730a002g004680	-1.09867	8.60002e-24	1.19901e-19	0.089	0.297	AT5G38280;AT1G75800;AT5G24620;AT1G77700;AT2G17860;AT4G36010;AT4G38670;AT1G20030	PR5K;;;;;;;	putative receptor serine/threonine kinase PR5K (PR5K) mRNA, PR5-like receptor kinase;Pathogenesis-related thaumatin superfamily protein;Pathogenesis-related thaumatin superfamily protein;Pathogenesis-related thaumatin superfamily protein;Pathogenesis-related thaumatin superfamily protein;Pathogenesis-related thaumatin superfamily protein;Pathogenesis-related thaumatin superfamily protein;Pathogen…
Wa8730a015g006060	-1.10186	1.51061e-27	2.10609e-23	0.023	0.204	AT3G01840;AT2G23770;AT5G35370	LYK2;LYK4;	Encodes a putative LysM-containing receptor-like kinase. Induction of chitin-responsive genes by chitin treatment is not blocked in the mutant. Based on protein sequence alignment analysis, it was determined to be a pseudo kinase since lack of the ATP-binding P-loop in the kinase domain.;Encodes a putative LysM-containing receptor-like kinase LYK4. Shares overlapping function with LYK5 in mediati…
Wa8730a013g004270	-1.10452	6.73639e-21	9.39187e-17	0.384	0.569	AT5G43830;AT4G27450	;	Aluminium induced protein with YGL and LRDR motifs;Aluminium induced protein with YGL and LRDR motifs
Wa8730a012g005080	-1.10572	1.87547e-18	2.61478e-14	0.251	0.428	AT5G09930;AT5G64840;AT4G33460;AT2G22120	ABCF2;ABCF5, ATGCN5, GCN5;ABCI10, ATNAP13, EMB2751;	member of GCN subfamily;member of GCN subfamily;member of NAP subfamily;RING/FYVE/PHD zinc finger superfamily protein
Wa8730a002g002720	-1.11363	7.39934e-20	1.03162e-15	0.236	0.435	AT3G60780;AT2G45360;AT1G62840;AT1G12320;AT5G62280	;;;;	Protein of unknown function (DUF1442);Protein of unknown function (DUF1442);Protein of unknown function (DUF1442);Protein of unknown function (DUF1442);Protein of unknown function (DUF1442)
Wa8730a003g004130	-1.11397	2.00875e-23	2.8006e-19	0.054	0.241	AT5G11420;AT2G41810;AT3G08030	;;	Protein of unknown function, DUF642;Protein of unknown function, DUF642;The mRNA of this gene is expressed in viable seeds. Its detection in a dry seed lot has potential for use as a molecular marker for germination performance as absence of expression correlates with decreased germination.
Wa8730a002g005830	-1.11847	6.62442e-15	9.23576e-11	0.251	0.414	AT1G76520;AT5G65980;AT2G17500;AT1G20925	;;;	Auxin efflux carrier family protein;Auxin efflux carrier family protein;Auxin efflux carrier family protein;Auxin efflux carrier family protein
Wa8730a004g000220	-1.12034	1.35691e-23	1.89181e-19	0.072	0.265
Wa8730a001g001150	-1.12562	2.05729e-17	2.86827e-13	0.192	0.372	AT5G12140;AT3G12490;AT2G40880	ATCYS1, CYS1;ATCYS6, ATCYSB, CYSB;ATCYSA, CYSA, FL3-27	Encodes a cystatin.;Encodes a protein with cysteine proteinase inhibitor activity. Overexpression increases tolerance to abiotic stressors (i.e.salt,osmitic, cold stress).;Encodes a protein with cysteine proteinase inhibitor activity. Overexpression increases tolerance to abiotic stressors (i.e.salt,osmitic, cold stress).
Wa8730a015g002360	-1.1284	3.72886e-22	5.19878e-18	0.17	0.38	AT4G32030
Wa8730a012g004060	-1.12982	6.61529e-30	9.22304e-26	0.018	0.207	AT5G37500;AT3G02850	GORK;SKOR	Encodes a guard cell outward potassium channel. Belongs to the Shaker family K+ channel. This family includes five groups based on phylogenetic analysis (FEBS Letters (2007) 581: 2357): I (inward rectifying channel): AKT1 (AT2G26650), AKT5 (AT4G32500) and SPIK (also known as AKT6, AT2G25600); II (inward rectifying channel): KAT1 (AT5G46240) and KAT2 (AT4G18290); III (weakly inward rectifying chan…
Wa8730a015g004800	-1.13188	5.97146e-18	8.3254e-14	0.102	0.27
Wa8730a004g006020	-1.13245	2.86723e-20	3.9975e-16	0.116	0.305	AT1G29395	COR413-TM1, COR413IM1, COR414-TM1	Integral membrane protein in the inner envelope of chloroplasts. Provide freezing tolerance. Expression is induced by short-term cold-treatment, water deprivation, and abscisic acid treatment.
Wa8730a004g008440	-1.13579	1.12509e-24	1.5686e-20	0.166	0.397
Wa8730a015g005040	-1.1383	1.9935e-16	2.77934e-12	0.155	0.323
Wa8730a019g001080	-1.13941	2.61206e-25	3.64173e-21	0.082	0.291	AT2G30250;AT2G38470;AT5G07100	ATWRKY25, WRKY25;ATWRKY33, WRKY33;WRKY26	member of WRKY Transcription Factor; Group I. Located in nucleus. Involved in response to various abiotic stresses - especially salt stress.;Member of the plant WRKY transcription factor family. Regulates the antagonistic relationship between defense pathways mediating responses to P. syringae and necrotrophic fungal pathogens. Located in nucleus. Involved in response to various abiotic stresses …
Wa8730a009g005900	-1.14109	5.38733e-24	7.51102e-20	0.144	0.363	AT1G49160	WNK7	Encodes a member of the WNK family (9 members in all) of protein kinases, the structural design of which is clearly distinct from those of other known protein kinases, such as receptor-like kinases and mitogen-activated protein kinases. Its
Wa8730a017g003260	-1.14171	1.13088e-22	1.57668e-18	0.044	0.218	AT3G19970		alpha/beta-Hydrolases superfamily protein
Wa8730a012g004840	-1.14217	1.37627e-25	1.91879e-21	0.086	0.294	AT1G78080;AT1G22190;AT2G22200;AT4G39780;AT5G65130;AT1G36060	AtWIND1, RAP2.4, WIND1;RAP2.4;;;;	Encodes a member of the DREB subfamily A-6 of ERF/AP2 transcription factor family (RAP2.4). The protein contains one AP2 domain. Role in mediating light and ethylene signaling.;The gene encodes a putative transcription factor belongings to the abiotic stress-associated DREB A-6 clade. The mRNA is cell-to-cell mobile.;encodes a member of the DREB subfamily A-6 of ERF/AP2 transcription factor famil…
Wa8730a005g004220	-1.14249	3.57621e-25	4.98595e-21	0.045	0.236	AT4G01070;AT1G01420;AT5G26310	GT72B1, UGT72B1;UGT72B3;UGT72E3	the glycosyltransferase (UGT72B1) is involved in metabolizing xenobiotica (chloroaniline and chlorophenole). Comparison between wild type and knock-out mutant demonstrates the central role of this gene for metabolizing chloroaniline but significantly less for chlorophenole. The glucosyltransferase preferred UDP-xylose over UDP-glucose indicating its (additional) functioning as a xylosyltransferas…
Wa8730a001g002830	-1.14407	2.42012e-22	3.37413e-18	0.206	0.426	AT1G09070;AT1G12810	(ATSRC2, AtSRC2, SRC2;	SRC2 specifically binds the peptide PIEPPPHH, and moves from ER to a vacuole fraction where it gets internalized. Involved in Protein Storage Vacuole targeting.;proline-rich family protein
Wa8730a004g008620	-1.14472	4.76203e-17	6.63922e-13	0.074	0.228	AT1G15460;AT4G32510;AT5G25430	ATBOR4, BOR4;;	Encodes a efflux-type boron transporter. Over-expression improved plant growth under B toxic conditions.;HCO3- transporter family;HCO3- transporter family
Wa8730a001g005860	-1.14674	3.03674e-33	4.23382e-29	0.016	0.221	AT2G33050;AT1G58190;AT3G51740	AtRLP26, RLP26;AtRLP9, RLP9;IMK2	receptor like protein 26;receptor like protein 9;encodes a leucine-repeat receptor kinase expressed in inflorescence meristem. Locus association was made from performing sequence analysis with IMK3 (MRLK) whose locus association was provided by the authors.
Wa8730a003g002080	-1.14987	1.44071e-32	2.00864e-28	0.518	0.708	AT5G67450;AT3G19580;AT5G43170;AT1G27730;AT3G49930;AT1G49900	AZF1, ZF1;AZF2, ZF2;AZF3, ZF3;STZ, ZAT10;;	Encodes zinc-finger protein. mRNA levels are elevated in response to low temperature, cold temperatures and high salt. The protein is localized to the nucleus and acts as a transcriptional repressor.;Encodes zinc finger protein. mRNA levels are upregulated in response to ABA, high salt, and mild dessication. The protein is localized to the nucleus and acts as a transcriptional repressor.;Encodes …
Wa8730a002g004950	-1.15082	4.30034e-19	5.99553e-15	0.018	0.145	AT4G30150
Wa8730a001g011840	-1.15769	1.65196e-23	2.30316e-19	0.041	0.215	AT3G11410;AT1G07430;AT5G59220;AT2G29380	AHG3, ATPP2CA, PP2CA;AIP1, AtAIP1, HAI2, HON;HAI1, SAG113;HAI3	Encodes protein phosphatase 2C. Negative regulator of ABA signalling. Expressed in seeds during germination. mRNA up-regulated by drought and ABA.;Encodes a member of the group A protein phosphatase 2C (PP2C) family that is responsible for negatively regulating seed dormancy.;Encodes a member of the PP2C family (Clade A protein phosphatases type 2C). Functions as a negative regulator of osmotic s…
Wa8730a002g001840	-1.16119	3.52031e-24	4.90801e-20	0.165	0.391	AT4G39090;AT3G49340;AT2G21430	RD19, RD19A;;	Similar to cysteine proteinases, induced by desiccation but not abscisic acid. Required for RRS1-R mediated resistance against Ralstonia solanacearum. Interacts with the R. solanacearum type III effector PopP2. RD19 associates with PopP2 to form a nuclear complex that is required for activation of the RRS1-Rmediated resistance response.;Cysteine proteinases superfamily protein;Papain family cyste…
Wa8730a005g004510	-1.16511	1.5156e-24	2.11304e-20	0.031	0.204	AT5G53050		alpha/beta-Hydrolases superfamily protein
Wa8730a007g001150	-1.16606	1.64206e-21	2.28936e-17	0.161	0.368
Wa8730a007g002110	-1.17078	4.8108e-11	6.70721e-07	0.044	0.144
Wa8730a001g004200	-1.17336	6.44143e-25	8.98064e-21	0.072	0.273	AT4G02075;AT1G02610	PIT1;	RING/FYVE/PHD zinc finger superfamily protein;RING/FYVE/PHD zinc finger superfamily protein
Wa8730a016g001100	-1.17341	2.56641e-24	3.57809e-20	0.139	0.357	AT5G09360;AT1G21860;AT4G39830	LAC14;sks7;	putative laccase, a member of laccase family of genes (17 members in Arabidopsis).;SKU5 similar 7;Cupredoxin superfamily protein
Wa8730a009g000380	-1.17714	1.5327e-13	2.1369e-09	0.105	0.244	AT3G53880;AT2G37770	AKR4C11;AKR4C9, ChlAKR	NAD(P)-linked oxidoreductase superfamily protein;Encodes an NADPH-dependent aldo-keto reductase that can act on a wide variety of substrates in vitro including saturated and unsaturated aldehydes, steroids, and sugars. GFP-tagged AKR4C9 localizes to the chloroplast where it may play a role in detoxifying reactive carbonyl compounds that threaten to impair the photosynthetic process. Transcript le…
Wa8730a006g000870	-1.18867	7.26847e-23	1.01337e-18	0.041	0.212	AT1G79350	EMB1135	Encodes the Arabidopsis thaliana orthologue of metazoan Strawberry notch, a highly conserved co-activator of the developmental regulator Notch. It mediates stress-induced chromatin memory by modulating nucleosome occupancy by interacting with chromatin remodeling proteins of the ISWI and SWI/SNF classes.
Wa8730a011g002000	-1.19187	1.05126e-31	1.46567e-27	0.037	0.254
Wa8730a001g010390	-1.20141	8.17855e-27	1.14025e-22	0.069	0.284
Wa8730a005g002190	-1.20504	9.43854e-20	1.31592e-15	0.11	0.294	AT4G33050;AT3G13600;AT3G52870;AT5G57010;AT2G26190	AtIQM1, EDA39, IQM1;;;;	Encodes a calmodulin-binding protein involved in stomatal movement.;calmodulin-binding family protein;IQ calmodulin-binding motif family protein;calmodulin-binding family protein;calmodulin-binding family protein
Wa8730a002g009830	-1.20784	5.65377e-20	7.88248e-16	0.063	0.229	AT3G23530		Cyclopropane-fatty-acyl-phospholipid synthase
Wa8730a008g005120	-1.20995	3.5111e-61	4.89518e-57	0.856	0.937	AT4G05320	UBI10, UBQ10	One of five polyubiquitin genes in A. thaliana. These genes encode the highly conserved 76-amino acid protein ubiquitin that is covalently attached to substrate proteins targeting most for degradation. Polyubiquitin genes are characterized by the presence of tandem repeats of the 228 bp that encode a ubiquitin monomer. Induced by salicylic acid. Independent of NPR1 for their induction by salicyli…
Wa8730a003g006850	-1.21193	4.43933e-26	6.18931e-22	0.042	0.234	AT1G74410		RING/U-box superfamily protein
Wa8730a009g001650	-1.22849	4.89236e-10	6.82093e-06	0.09	0.2	AT2G29890;AT2G41740;AT3G57410	ATVLN1, VLN1;ATVLN2, VLN2;ATVLN3, VLN3	Encodes a ubiquitously expressed villin-like protein, whose mRNA may be alternatively processed. Villin belongs to a superfamily of actin binding proteins called the villin/gelsolin family. Animal villins are involved in actin binding. VLN1 protein co-localizes with actin filaments in several assays. VLN1 binds and bundles F-actin in a calcium-independent manner. It does not nucleate, cap or seve…
Wa8730a010g000100	-1.23161	8.24578e-32	1.14963e-27	0.03	0.242	AT3G16340;AT3G53480	ABCG29, ATPDR1, AtABCG29, PDR1;ABCG37, ATPDR9, PDR9, PIS1	Encodes a p-coumaryl alcohol exporter involved in lignin biosynthesis.;Negative regulator of auxin polar transport inhibitors. ABCG37 regulates auxin distribution and homeostasis in roots by excluding IBA from the root apex, but does not act directly in basipetal transport. ABCG37 and ABCG36 act redundantly at outermost root plasma membranes and, transport IBA out of the cells.
Wa8730a017g003290	-1.25089	3.80755e-16	5.30849e-12	0.094	0.25	AT4G04955	ALN, ATALN	Encodes an allantoinase which is involved in allantoin degradation and assimilation. Gene expression was induced when allantoin was added to the medium. The insertion mutant, ataln m2-1, did not grow well on the MS medium where allantoin, instead of ammonium nitrate, was supplied.
Wa8730a017g003160	-1.25153	1.60443e-28	2.23689e-24	0.087	0.312
Wa8730a018g001130	-1.25384	6.93021e-22	9.6621e-18	0.098	0.294	AT2G38280	ATAMPD, FAC1	Encodes a protein with in vitro AMP deaminase activity that is involved in embryogenesis. Homozygous mutant embryos fail to develop past the zygote stage.
Wa8730a006g002900	-1.25536	5.33676e-10	7.44051e-06	0.124	0.241	AT3G25230;AT5G48570	ATFKBP62, FKBP62, ROF1;ATFKBP65, FKBP65, ROF2	Encodes a a high molecular weight member of the FK506 binding protein (FKBP) family. It has three FKBP12-like domains, tetratricopeptide repeats, and a putative calmodulin binding domain. Modulates thermotolerance by interacting with HSP90.1 and affecting the accumulation of HsfA2-regulated sHSPs.;Encodes one of the 36 carboxylate clamp (CC)-tetratricopeptide repeat (TPR) proteins (Prasad 2010, P…
Wa8730a009g003680	-1.25663	1.0245e-29	1.42836e-25	0.234	0.485	AT2G41430	CID1, ERD15, LSR1	Encodes hydrophilic protein lacking Cys residues that is expressed in response to drought stress, light stress and treatment with plant-growth-promoting rhizobacteria (Paenibacillus polymyxa), possibly revealing a connection between responses to biotic and abiotic stress. Also identified as a CTC Interacting Domain (CID) protein in a yeast two hybrid screen using the PAB2 protein as bait. Contain…
Wa8730a003g001270	-1.26099	3.12546e-31	4.35751e-27	0.097	0.346	AT4G37790;AT2G22800	HAT22;HAT9	Encodes homeobox protein HAT22, member of the HD-Zip II family.;Encodes homeobox protein HAT9.
Wa8730a010g003610	-1.27775	4.16145e-28	5.8019e-24	0.045	0.25
Wa8730a009g003530	-1.27859	3.31719e-25	4.62483e-21	0.873	0.94	AT2G38530	LP2, LTP2, cdf3	Involved in lipid transfer between membranes. Belongs to a family of Lipid transfer proteins. Sequence similarity to other plant/Arabidopsis LPT genes but highest similarity to LPT1. Stress and pathogen-inducible motifs found in the upstream region. Expressed in flower, leaves and siliques but absent in roots. Predicted to be a member of PR-14 pathogenesis-related protein family with the followin…
Wa8730a003g007810	-1.28207	7.0606e-17	9.84389e-13	0.203	0.37	AT5G58375;AT5G18150;AT5G14602	;;	Methyltransferase-related protein;Methyltransferase-related protein;
Wa8730a007g000440	-1.28723	6.63587e-25	9.25172e-21	0.173	0.396	AT1G76900;AT1G43640	AtTLP1, TLP1;AtTLP5, TLP5	Member of TLP family;Member of TLP family
Wa8730a008g003440	-1.29221	1.47797e-16	2.06058e-12	0.202	0.373	AT1G30640;AT3G23310;AT2G20470	;;	Protein kinase family protein;AGC (cAMP-dependent, cGMP-dependent and protein kinase C) kinase family protein;AGC (cAMP-dependent, cGMP-dependent and protein kinase C) kinase family protein
Wa8730a015g004640	-1.30374	1.17465e-16	1.6377e-12	0.196	0.375	AT3G48180;AT1G24405	;	;
Wa8730a014g006110	-1.31894	1.78059e-30	2.4825e-26	0.129	0.384	AT1G14370;AT4G35600;AT2G17220;AT3G55450;AT1G76360;AT1G18160;AT5G03320	APK2A, Kin1, PBL2;CST, CX32, Kin4;Kin3;PBL1;;;	Encodes protein kinase APK2a.;plant-type connexin (gap junction-type protein), a component of plasmodesmata;Encodes a putative serine/threonine-specific protein kinase kin3. Protein is N-myristoylated.;PBS1-like 1;Protein kinase superfamily protein;Protein kinase superfamily protein;Protein kinase superfamily protein
Wa8730a019g000710	-1.32083	1.11783e-31	1.55847e-27	0.187	0.457	AT3G55150;AT2G39380;AT3G09520;AT1G07725;AT5G59730;AT2G28650	ATEXO70H1, EXO70H1;ATEXO70H2, EXO70H2;ATEXO70H4, EXO70H4;ATEXO70H6, EXO70H6;ATEXO70H7, EXO70H7;ATEXO70H8, EXO70H8	A member of EXO70 gene family, putative exocyst subunits, conserved in land plants. Arabidopsis thaliana contains 23 putative EXO70 genes, which can be classified into eight clusters on the phylogenetic tree.;A member of EXO70 gene family, putative exocyst subunits, conserved in land plants. Arabidopsis thaliana contains 23 putative EXO70 genes, which can be classified into eight clusters on the …
Wa8730a004g004350	-1.3219	9.89738e-30	1.37989e-25	0.102	0.344	AT5G11210	ATGLR2.5, GLR2.5	member of Putative ligand-gated ion channel subunit family
Wa8730a012g000770	-1.32672	9.80943e-10	1.36763e-05	0.112	0.223	AT5G08720		Encodes PIN2 PROMOTER BINDING PROTEIN 1 (PPP1), an evolutionary conserved plant-specific DNA binding protein that acts on transcription of PIN genes. Also named as HCF145. Mutations in HCF145 have reduced level of the tricistronic psaA-psaB-rps (small-subunit ribosomal protein)14 mRNA which encodes for the major subunits of the photosystem I (PSI). HCF145 binds to the 5'UTR of PSAA via a novel TM…
Wa8730a014g005560	-1.33047	4.89337e-19	6.82234e-15	0.098	0.271	AT4G35040;AT2G16770	bZIP19;bZIP23	Basic-region leucine zipper (bZIP19) transcription factor involved in the adaptation to zinc deficiency. Binds ZDRE motifs.;Basic-region leucine zipper (bZIP23) transcription factor involved in the adaptation to zinc deficiency. Binds ZDRE motifs.
Wa8730a006g005110	-1.33196	1.61811e-19	2.25597e-15	0.123	0.31	AT5G07340		Calreticulin family protein
Wa8730a002g004460	-1.3343	6.33453e-48	8.8316e-44	0.512	0.803	AT4G38580;AT1G71050;AT4G35060;AT5G66110	ATFP6, FP6, HIPP26;HIPP20;HIPP25;HIPP27	putative farnesylated protein (At4g38580) mRNA, complete;Heavy metal transport/detoxification superfamily protein ;Heavy metal transport/detoxification superfamily protein ;Heavy metal transport/detoxification superfamily protein
Wa8730a001g007240	-1.33692	1.67723e-24	2.33839e-20	0.178	0.399	AT3G10320;AT2G41640;AT3G57380	;;	MUCI21 is a GT61 protein required for the production of highly branched xylan in seed coat mucilage. MUCI21 likely decorates xylan with xylose side chains that seem to be necessary for pectin attachment to the seed surface.;Glycosyltransferase family 61 protein;Glycosyltransferase family 61 protein
Wa8730a003g004430	-1.34112	8.27337e-32	1.15347e-27	0.018	0.215	AT1G55020;AT3G22400	ATLOX1, LOX1;ATLOX5, LOX5	lipoxygenase, a defense gene conferring resistance Xanthomonas campestris;Encodes lipoxygenase5 (LOX5). LOX5 activity in roots facilitates green peach aphid colonization of Arabidopsis foliage by promoting green peach aphid feeding from sieve element and water consumption from xylem.
Wa8730a011g000990	-1.34437	4.88133e-30	6.80556e-26	0.262	0.519	AT4G18780;AT5G16910;AT3G03050;AT1G32180	ATCESA8, CESA8, IRX1, LEW2;ATCSLD2, CSLD2;ATCSLD3, CSLD3, KJK, RHD7;ATCSLD6, CSLD6	Encodes a member of the cellulose synthase family involved in secondary cell wall biosynthesis. Mutants have abnormal xylem formation, reduced cellulose content, and enhanced drought and osmotic stress tolerance. Mediates resistance towards bacterial pathogens via ABA. Confers resistance towards bacterial and fungal pathogens, independent of salicylic acid, ethylene and jasmonate signaling.;encod…
Wa8730a018g000530	-1.34709	1.96262e-24	2.73629e-20	0.213	0.433	AT3G10330	AtTFIIB2, TFIIB2	Cyclin-like family protein
Wa8730a015g001540	-1.35476	6.79282e-21	9.47055e-17	0.129	0.32	AT4G30210	AR2, ATR2	Encodes NADPH-cytochrome P450 reductase that catalyzes the first oxidative step of the phenylpropanoid general pathway.
Wa8730a007g000990	-1.35612	3.15708e-09	4.4016e-05	0.127	0.244
Wa8730a016g001520	-1.35995	8.13146e-15	1.13369e-10	0.294	0.446	AT1G35140;AT5G64260;AT5G09440;AT4G08950	EXL1, PHI-1;EXL2;EXL4;EXO	At1g35140 (At1g35140/T32G9_32) mRNA, complete cds;EXORDIUM like 2;EXORDIUM like 4;Phosphate-responsive 1 family protein
Wa8730a015g003100	-1.36882	6.56594e-16	9.15424e-12	0.027	0.145	AT1G54510;AT3G04810;AT3G20860;AT3G12200;AT1G15530	ATNEK1, NEK1;ATNEK2, NEK2;ATNEK5, NEK5;AtNek7, Nek7;LecRK-S.1	Encodes AtNEK1, a member of the NIMA-related serine/threonine kinases (Neks) that have been linked to cell-cycle regulation in fungi and mammals. Plant Neks might be involved in plant development processes.;Encodes AtNek2, a member of the NIMA-related serine/threonine kinases (Neks) that have been linked to cell-cycle regulation in fungi and mammals. Plant Neks might be involved in plant developm…
Wa8730a003g000100	-1.3719	3.51238e-32	4.89696e-28	0.108	0.362	AT5G10550;AT5G65630;AT1G17790	GTE2;GTE7;	This gene is predicted to encode a bromodomain-containing protein. A plant line expressing RNAi constructs targeted against GTE7 shows some resistance to agrobacterium-mediated root transformation.;This gene is predicted to encode a bromodomain-containing protein. Plant lines expressing RNAi constructs targeted against GTE7 show some resistance to agrobacterium-mediated root transformation.;DNA-b…
Wa8730a003g005710	-1.37412	1.06019e-26	1.47811e-22	0.069	0.279	AT4G08580		microfibrillar-associated protein-related
Wa8730a014g000910	-1.37496	4.65112e-34	6.48459e-30	0.123	0.393	AT5G67450;AT3G19580;AT5G43170;AT1G27730;AT2G28710;AT3G49930;AT1G49900	AZF1, ZF1;AZF2, ZF2;AZF3, ZF3;STZ, ZAT10;;;	Encodes zinc-finger protein. mRNA levels are elevated in response to low temperature, cold temperatures and high salt. The protein is localized to the nucleus and acts as a transcriptional repressor.;Encodes zinc finger protein. mRNA levels are upregulated in response to ABA, high salt, and mild dessication. The protein is localized to the nucleus and acts as a transcriptional repressor.;Encodes …
Wa8730a005g006990	-1.38017	1.50139e-36	2.09323e-32	0.042	0.289	AT3G27870;AT1G68710;AT1G26130	;;	ATPase E1-E2 type family protein / haloacid dehalogenase-like hydrolase family protein;ATPase E1-E2 type family protein / haloacid dehalogenase-like hydrolase family protein;ATPase E1-E2 type family protein / haloacid dehalogenase-like hydrolase family protein
Wa8730a010g001140	-1.38094	5.13844e-36	7.16401e-32	0.2	0.493	AT4G29190;AT2G25900;AT2G19810;AT1G03790;AT5G44260	AtC3H49, AtOZF2, AtTZF3, OZF2, TZF3;ATCTH, ATTZF1;AtOZF1, AtTZF2, OZF1, TZF2;AtTZF4, SOM, TZF4;AtTZF5, TZF5	Zinc finger C-x8-C-x5-C-x3-H type family protein;putative Cys3His zinc finger protein (ATCTH) mRNA, complete;Encodes Oxidation-related Zinc Finger 1 (OZF1), a plasma membrane protein involved in oxidative stress.;Encodes SOMNUS (SOM), a nucleus-localized CCCH-type zinc finger protein. SOM negatively regulates light-dependent seed germination downstream of PIL5 (AT2G20180).;Encodes a Tandem CCCH Z…
Wa8730a001g002190	-1.39606	6.4381e-28	8.976e-24	0.089	0.317	AT5G19120;AT1G03220	;	Eukaryotic aspartyl protease family protein;Eukaryotic aspartyl protease family protein
Wa8730a010g004440	-1.40316	9.93194e-16	1.38471e-11	0.067	0.21
Wa8730a006g002200	-1.41317	4.48477e-40	6.25266e-36	0.192	0.494	AT5G63130;AT3G26510	;	Octicosapeptide/Phox/Bem1p family protein;Octicosapeptide/Phox/Bem1p family protein
Wa8730a009g006540	-1.42188	2.91909e-28	4.0698e-24	0.189	0.425	AT1G69260;AT1G13740;AT3G29575	AFP1;AFP2;AFP3	ABI five binding protein;Encodes a member of a small plant-specific gene family whose members interact with ABI5 and appear to be involved in mediating stress responses. AFP2 mutants affect a number of ABA mediated processes such as germination and response to osmotic and sugar stress. AFP2 nuclear localization is stress dependent.;ABI five binding protein 3
Wa8730a015g004730	-1.42235	1.01516e-17	1.41534e-13	0.031	0.165	AT3G28345	ABCB15, MDR13	Encodes an ATP-binding cassette (ABC) transporter. Expressed in the vascular tissue of primary stem.
Wa8730a010g001960	-1.4252	2.75698e-34	3.84379e-30	0.17	0.451	AT2G31090;AT2G20562	;	Encodes a signalling peptide influencing lateral organ separation.;Encodes a putative signalling peptide with similarity to TAX1. No known function has been demonstrated yet.
Wa8730a013g005140	-1.42774	3.87026e-37	5.39591e-33	0.037	0.284
Wa8730a001g010360	-1.43219	1.03775e-25	1.44684e-21	0.142	0.367
Wa8730a012g000410	-1.44436	6.13297e-35	8.55059e-31	0.061	0.312	AT2G27350	OTLD1	Encodes an otubain-like histone deubiquitinase involved in chromatin modification and regulation of plant gene expression.
Wa8730a006g001210	-1.45382	3.33589e-25	4.6509e-21	0.106	0.325	AT2G32210;AT3G22240	;	;
Wa8730a001g012190	-1.45472	1.89887e-33	2.6474e-29	0.031	0.252	AT5G01100;AT3G54100;AT2G37980	FRB1;;	O-fucosyltransferase family protein;O-fucosyltransferase family protein;O-fucosyltransferase family protein
Wa8730a001g004430	-1.45519	3.7894e-27	5.28319e-23	0.125	0.352	AT1G08320	TGA9, bZIP21	bZIP transcription factor family protein
Wa8730a016g004470	-1.4642	7.19868e-23	1.00364e-18	0.238	0.444	AT1G60420	AtNRX1, NRX1	Reduce transmission through pollen.
Wa8730a010g004820	-1.46667	2.21309e-32	3.08548e-28	0.015	0.212	AT5G15730;AT5G47850;AT4G31250	AtCRLK2, CRLK2;CCR4;	Protein kinase superfamily protein;CRINKLY4 related 4;Leucine-rich repeat protein kinase family protein
Wa8730a005g008320	-1.47657	7.76127e-42	1.08208e-37	0.011	0.252	AT1G26150;AT1G70740;AT1G49100;AT1G29740	AtPERK10, PERK10;;;	Encodes a member of the proline-rich extensin-like receptor kinase (PERK) family. This family consists of 15 predicted receptor kinases (PMID: 15653807).;Protein kinase superfamily protein;Leucine-rich repeat protein kinase family protein;Leucine-rich repeat transmembrane protein kinase
Wa8730a006g004380	-1.47751	1.42076e-28	1.98082e-24	0.193	0.443	AT3G07570		Cytochrome b561/ferric reductase transmembrane with DOMON related domain
Wa8730a007g002120	-1.4827	1.61052e-34	2.24539e-30	0.048	0.284	AT3G25560;AT4G13810;AT5G48380;AT2G31880;AT1G12040;AT1G62440;AT1G78530;AT1G05700	AtNIK2, NIK2;AtRLP47, RLP47;BIR1;EVR, SOBIR1;LRX1;LRX2;;	NSP-interacting kinase 2;receptor like protein 47;Encodes a BAK1-interacting receptor-like kinase named BIR1. Negatively regulates multiple plant resistance signaling pathways, one of which is the SOBIR1(AT2G31880)-dependent pathway.;Encodes a putative leucine rich repeat transmembrane protein that is expressed in response to Pseudomonas syringae. Expression of SRRLK may be required for silencing…
Wa8730a005g001590	-1.48846	1.01874e-30	1.42033e-26	0.074	0.31	AT5G12020;AT5G51440	HSP17.6II;	17.6 kDa class II heat shock protein;HSP20-like chaperones superfamily protein
Wa8730a004g008230	-1.49323	2.61811e-33	3.65017e-29	0.023	0.234
Wa8730a017g001840	-1.49815	9.50807e-38	1.32561e-33	0.094	0.376	AT5G51460;AT4G12430;AT4G22590	ATTPPA, TPPA;TPPF;TPPG	homologous to the C-terminal part of microbial trehalose-6-phosphate phosphatases;Haloacid dehalogenase-like hydrolase (HAD) superfamily protein;Haloacid dehalogenase-like hydrolase (HAD) superfamily protein
Wa8730a017g002860	-1.51052	4.25008e-36	5.92546e-32	0.3	0.564	AT4G02600;AT5G65970;AT2G39200;AT1G11310;AT2G17480	ATMLO1, MLO1;ATMLO10, MLO10;ATMLO12, MLO12;ATMLO2, MLO2, PMR2;ATMLO8, MLO8	A member of a large family of seven-transmembrane domain proteins specific to plants, homologs of the barley mildew resistance locus o (MLO) protein. The Arabidopsis genome contains 15 genes encoding MLO proteins, with localization in plasma membrane. Phylogenetic analysis revealed four clades of closely-related AtMLO genes. ATMLO1 belongs to the clade II, with ATMLO13 and ATMLO15. The gene is ex…
Wa8730a016g003850	-1.51225	7.98143e-52	1.11277e-47	0.435	0.74	AT5G17330;AT1G65960;AT2G02010;AT3G17760	GAD, GAD1;GAD2;GAD4;GAD5	Encodes one of two isoforms of glutamate decarboxylase.;glutamate decarboxylase (GAD2);glutamate decarboxylase 4;glutamate decarboxylase 5
Wa8730a020g001370	-1.51303	6.96563e-23	9.71148e-19	0.211	0.418	AT2G33480;AT5G13180	ANAC041, NAC041;ANAC083, NAC083, VNI2	NAC domain containing protein 41;Encodes a NAC domain transcription factor that interacts with VND7 and negatively regulates xylem vessel formation.
Wa8730a009g006210	-1.53496	4.18452e-40	5.83406e-36	0.068	0.342	AT1G27770;AT3G57330;AT4G37640;AT2G22950	ACA1, PEA1;ACA11;ACA2;ACA7	Encodes a chloroplast envelope Ca2+-ATPase with an N-terminal autoinhibitor.;Lesion mimic phenotype when mutation in the gene is combined with a mutation in ACA4. Lesion mimic phenotype of double knockout can be suppressed by nutritional supplements that increase anion levels (e.g. 15 mM Nitrate, Chloride, or Phosphate);Encodes a calmodulin-regulated Ca(2+)-pump located in the endoplasmic reticul…
Wa8730a012g004170	-1.53716	1.52607e-35	2.12764e-31	0.112	0.381	AT1G78720;AT2G34250;AT1G29310	;;	SecY protein transport family protein;SecY protein transport family protein;SecY protein transport family protein
Wa8730a008g003990	-1.54527	5.81475e-18	8.10693e-14	0.353	0.52	AT2G32240
Wa8730a020g001680	-1.5504	1.21313e-26	1.69135e-22	0.075	0.286	AT1G17420;AT1G67560	ATLOX3, LOX3;ATLOX6, LOX6	Lipoxygenase;PLAT/LH2 domain-containing lipoxygenase family protein
Wa8730a006g001290	-1.55121	8.55936e-13	1.19335e-08	0.226	0.365	AT2G32210;AT3G22240	;	;
Wa8730a011g005910	-1.5593	1.12323e-37	1.566e-33	0.274	0.559	AT5G57123;AT4G29905;AT5G10695	;;	;;
Wa8730a003g004240	-1.56402	5.11853e-35	7.13626e-31	0.125	0.402	AT2G41870;AT3G57540	;	Remorin family protein;Remorin family protein
Wa8730a019g000660	-1.56768	1.26709e-34	1.76657e-30	0.067	0.32	AT5G59820;AT2G37430;AT2G28710;AT1G02030;AT5G03510;AT3G46070;AT3G53600	AtZAT12, RHL41, ZAT12;ZAT11;;;;;	Encodes a zinc finger protein involved in high light and cold acclimation. Overexpression of this putative transcription factor increases the expression level of 9 cold-responsive genes and represses the expression level of 15 cold-responsive genes, including CBF genes. Also, lines overexpressing this gene exhibits a small but reproducible increase in freeze tolerance. Because of the repression o…
Wa8730a014g006640	-1.57067	7.46365e-08	0.00104058	0.049	0.129
Wa8730a017g002000	-1.57217	2.35232e-24	3.27961e-20	0.387	0.553	AT4G12030;AT4G22840	BASS5, BAT5;	Required for the biosynthesis of methionine-derived glucosinolates. Involved in the transport of 2-keto acids between chloroplasts and the cytosol.;Sodium Bile acid symporter family
Wa8730a006g001280	-1.61335	5.00437e-26	6.97709e-22	0.117	0.339	AT2G32210;AT3G22240	;	;
Wa8730a007g000380	-1.61849	8.29735e-51	1.15682e-46	0.266	0.616	AT3G44260;AT5G22250	AtCAF1a, CAF1a;AtCAF1b, CAF1b	Encodes one of the homologs of the yeast CCR4-associated factor 1: AT3G44260 (CAF1a), AT5G22250 (CAF1b). Has mRNA deadenylation activity. Also plays a role in plant defense responses.;Encodes one of the homologs of the yeast CCR4-associated factor 1: AT3G44260 (CAF1a), AT5G22250 (CAF1b). Has mRNA deadenylation activity. Also plays a role in plant defense responses.
Wa8730a015g001580	-1.61977	1.24552e-20	1.7365e-16	0.119	0.312	AT4G30280;AT5G48070;AT2G18800;AT4G25810;AT5G57550	ATXTH18, XTH18;ATXTH20, XTH20;ATXTH21, XTH21;XTH23, XTR6;XTH25, XTR3	Encodes a xyloglucan endotransglucosylase/hydrolase with only only the endotransglucosylase (XET; EC 2.4.1.207) activity towards xyloglucan and non-detectable endohydrolytic (XEH; EC 3.2.1.151) activity. Expressed in the mature or basal regions of both the main and lateral roots, but not in the tip of these roots where cell division occurs.;putative xyloglucan endotransglycosylase/hydrolase, expr…
Wa8730a014g003980	-1.6217	9.67512e-39	1.34891e-34	0.05	0.312
Wa8730a014g000630	-1.62374	6.64028e-24	9.25787e-20	0.42	0.596
Wa8730a005g005110	-1.62704	2.80413e-37	3.90952e-33	0.072	0.341	AT5G42830		HXXXD-type acyl-transferase family protein
Wa8730a001g011310	-1.62957	2.11285e-40	2.94573e-36	0.146	0.46	AT5G02500;AT3G12580;AT3G09440	AT-HSC70-1, AtHsp70-1, HSC70, HSC70-1, HSP70-1;ATHSP70, HSP70;	encodes a member of heat shock protein 70 family.;heat shock protein 70;Heat shock protein 70 (Hsp 70) family protein
Wa8730a001g003830	-1.63134	5.07616e-48	7.07719e-44	0.059	0.378	AT3G16720;AT2G47560;AT4G15975	ATL2, TL2;;	RING-H2 protein induced after exposure to chitin or inactivated crude cellulase preparations.;RING/U-box superfamily protein;RING/U-box superfamily protein
Wa8730a004g008240	-1.6377	1.15596e-37	1.61165e-33	0.087	0.365
Wa8730a003g000840	-1.65251	1.66078e-37	2.31546e-33	0.076	0.346	AT5G66650;AT4G36820;AT2G23790;AT5G42610	;;;	Protein of unknown function (DUF607);Protein of unknown function (DUF607);Protein of unknown function (DUF607);Protein of unknown function (DUF607)
Wa8730a017g002670	-1.65552	7.64759e-39	1.06623e-34	0.063	0.331	AT2G17890;AT4G36070;AT5G66210;AT5G24430	CPK16;CPK18;CPK28;	member of Calcium Dependent Protein Kinase;member of Calcium Dependent Protein Kinase;member of Calcium Dependent Protein Kinase;Calcium-dependent protein kinase (CDPK) family protein
Wa8730a011g005620	-1.6556	2.13939e-42	2.98274e-38	0.056	0.338	AT2G24720;AT4G31710;AT5G11180	ATGLR2.2, GLR2.2;ATGLR2.4, AUG8, GLR2.4;ATGLR2.6, GLR2.6	member of Putative ligand-gated ion channel subunit family;member of Putative ligand-gated ion channel subunit family;member of Putative ligand-gated ion channel subunit family
Wa8730a013g005360	-1.67526	5.12651e-52	7.14738e-48	0.074	0.414	AT3G23920	AtBAM1, BAM1, BMY7, TR-BAMY	Encodes a chloroplast beta-amylase. Is necessary for leaf starch breakdown in the absence of BAM3.
Wa8730a014g004410	-1.67879	1.65546e-58	2.30805e-54	0.379	0.701
Wa8730a011g003790	-1.68322	1.40853e-43	1.96377e-39	0.184	0.509	AT5G57620;AT5G67300;AT4G37260	AtMYB36, MYB36;ATMYB44, ATMYBR1, MYB44, MYBR1;ATMYB73, MYB73	Encodes a putative transcription factor (MYB36).;Member of the R2R3 factor MYB gene family involved in mediating plant responses to a variety of abiotic stimiuli.;Member of the R2R3 factor gene family.
Wa8730a007g006500	-1.68541	2.23978e-50	3.1227e-46	0.138	0.483
Wa8730a014g001980	-1.70068	8.65264e-38	1.20635e-33	0.054	0.313
Wa8730a015g002550	-1.70184	2.63623e-44	3.67543e-40	0.109	0.423	AT1G42990	ATBZIP60, BZIP60	AtbZIP60 consists of a bZIP DNA binding domain followed by a putative transmembrane domain. GFP fusions containing the first 260 amino acids (AtbZIP60deltaC) are nuclear-localized. AtbZIP60 is upregulated by the addition of tunicamycin (ER stress response inductor), DTT (inhibitor of disulfide bond formation) and azetin-2-carboxylate (proline analog perturbing protein structure). Upon ER stress t…
Wa8730a015g005840	-1.7022	3.34406e-38	4.66229e-34	0.016	0.246
Wa8730a015g001790	-1.70873	6.24986e-79	8.71355e-75	0.698	0.893	AT1G80920	AtJ8, AtToc12, DJC22, J8, Toc12	A nuclear encoded soluble protein found in the chloroplast stroma.
Wa8730a014g000450	-1.71087	1.19436e-45	1.66518e-41	0.11	0.43	AT1G49560;AT4G37180	;	Homeodomain-like superfamily protein;myb family transcription factor, contains Pfam domain, PF00249: Myb-like DNA-binding domain l; also isolated as a putative cytoskeletal protein in a yeast screen
Wa8730a010g006210	-1.71452	1.11996e-38	1.56145e-34	0.082	0.363	AT2G24580		FAD-dependent oxidoreductase family protein
Wa8730a001g003140	-1.71746	3.35196e-47	4.6733e-43	0.332	0.64	AT5G18670	BAM9, BMY3	putative beta-amylase BMY3 (BMY3)
Wa8730a005g003350	-1.72403	1.42419e-51	1.9856e-47	0.414	0.696	AT1G52245;AT3G16120	NA;	NA;Dynein light chain type 1 family protein
Wa8730a001g011500	-1.72842	1.7084e-45	2.38186e-41	0.05	0.339	AT2G29735;AT3G55430;AT4G34480;AT2G39640;AT3G46570	NA;;;;	NA;O-Glycosyl hydrolases family 17 protein;O-Glycosyl hydrolases family 17 protein;glycosyl hydrolase family 17 protein;Glycosyl hydrolase superfamily protein
Wa8730a001g005110	-1.73169	5.71306e-56	7.96515e-52	0.221	0.588	AT2G33480;AT3G15170;AT3G29035;AT5G18270;AT5G39610;AT3G04060;AT3G12977	ANAC041, NAC041;ANAC054, ATNAC1, CUC1;ANAC059, ATNAC3, NAC3, ORS1;ANAC087;ANAC092, ATNAC2, ATNAC6, NAC2, NAC6, ORE1;NAC046, anac046;	NAC domain containing protein 41;Encodes a transcription factor involved in shoot apical meristem formation and auxin-mediated lateral root formation. The gene is thought not to be involved in stress responses (NaCl, auxins, ethylene). <i>Cuc</i> mutant was first recognized at the heart stage, where embryos lacking two distinct bulges of cotyledonary primordia were observed.;Encodes a protein wit…
Wa8730a008g002350	-1.7359	5.21978e-33	7.27742e-29	0.129	0.389	AT5G11540	AtGulLO3, GulLO3	Encodes a homolog of rat L-gulono-1,4-lactone (L-GulL) oxidase that is involved in the biosynthesis of L-ascorbic acid.
Wa8730a008g005080	-1.73802	1.37538e-19	1.91756e-15	0.091	0.265	AT4G21215
Wa8730a005g006290	-1.73923	9.6982e-28	1.35212e-23	0.037	0.231	AT2G21490	LEA	dehydrin LEA
Wa8730a014g005520	-1.7466	2.18225e-30	3.04249e-26	0.14	0.388	AT2G17730;AT4G35840;AT5G66070	NIP2;;	Intrinsic thylakoid membrane protein that fixes RPOTmp on the stromal side of the thylakoid membrane.;RING/U-box superfamily protein;RING/U-box superfamily protein
Wa8730a007g006910	-1.75178	6.89076e-58	9.6071e-54	0.365	0.693	AT1G01720;AT5G63790;AT5G08790;AT1G77450	ANAC002, ATAF1;ANAC102, NAC102;ATAF2, anac081;NAC032, anac032	Belongs to a large family of putative transcriptional activators with NAC domain. Transcript level increases in response to wounding and abscisic acid. ATAF1 attentuates ABA signaling and sythesis. Mutants are hyposensitive to ABA.;Encodes a member of the NAC family of transcription factors. ANAC102 appears to have a role in mediating response to low oxygen stress (hypoxia) in germinating seedlin…
Wa8730a003g006350	-1.75927	6.51963e-45	9.08967e-41	0.042	0.326	AT5G09410;AT2G22300;AT1G77680	CAMTA1, EICBP.B;CAMTA3, SR1;	calmodulin-binding protein, similar to another ethylene-upregulated calmodulin-binding protein ER1 GI:11612392 from (Nicotiana tabacum);Encodes a putative CAM binding transcription factor. Loss of function mutations show enhanced resistance to fungal and bacterial pathogens suggesting that CAMTA functions to suppress defense responses.;Ribonuclease II/R family protein
Wa8730a003g006290	-1.78845	2.58693e-43	3.60669e-39	0.087	0.389	AT1G78230;AT3G17920	;	Outer arm dynein light chain 1 protein;Outer arm dynein light chain 1 protein
Wa8730a007g002940	-1.82736	2.74895e-26	3.83258e-22	0.068	0.273	AT4G24960;AT5G50720;AT2G42820	ATHVA22D, HVA22D;ATHVA22E, HVA22E;HVA22F	Homologous to a eukaryote specific ABA- and stress-inducible gene first isolated from barley. Groups in one subfamily with ATHVA22E. Along with other members of the ATHVA22 family, it may be involved in regulation of autophagy during development.;Encodes one of five HVA22 homologs in Arabidopsis. HVA22 is an ABA- and stress-inducible gene first isolated from barley. Members of this gene family ha…
Wa8730a009g002950	-1.83071	2.54609e-32	3.54975e-28	0.127	0.388	AT2G38870		Predicted to encode a PR (pathogenesis-related) peptide that belongs to the PR-6 proteinase inhibitor family. Six putative PR-6-type protein encoding genes are found in Arabidopsis: At2g38900, At2g38870, At5g43570, At5g43580, At3g50020 and At3g46860.
Wa8730a001g005100	-1.8315	1.97616e-45	2.75517e-41	0.104	0.418	AT5G04930	ALA1	Encodes a putative aminophospholipid translocase (p-type ATPase) involved in chilling response.
Wa8730a005g006550	-1.85543	8.96436e-63	1.24981e-58	0.192	0.591	AT3G27880;AT5G14730	;	Protein of unknown function (DUF1645);
Wa8730a019g000760	-1.86952	9.92232e-61	1.38337e-56	0.113	0.509	AT5G03540;AT3G55150;AT2G39380;AT3G09520;AT1G07725;AT5G59730;AT2G28650	ATEXO70A1, EXO70A1;ATEXO70H1, EXO70H1;ATEXO70H2, EXO70H2;ATEXO70H4, EXO70H4;ATEXO70H6, EXO70H6;ATEXO70H7, EXO70H7;ATEXO70H8, EXO70H8	AtEXO70A1 is a member of EXO70 gene family, putative exocyst subunits, conserved in land plants. Arabidopsis thaliana contains 23 putative EXO70 genes, which can be classified into nine clusters on the phylogenetic tree;A member of EXO70 gene family, putative exocyst subunits, conserved in land plants. Arabidopsis thaliana contains 23 putative EXO70 genes, which can be classified into eight clust…
Wa8730a016g001540	-1.87296	1.53014e-37	2.13332e-33	0.173	0.462	AT1G35140;AT5G64260;AT5G09440;AT4G08950	EXL1, PHI-1;EXL2;EXL4;EXO	At1g35140 (At1g35140/T32G9_32) mRNA, complete cds;EXORDIUM like 2;EXORDIUM like 4;Phosphate-responsive 1 family protein
Wa8730a007g006300	-1.88088	3.31617e-46	4.62341e-42	0.046	0.342	AT2G18193;AT3G50940;AT3G28580	;;	P-loop containing nucleoside triphosphate hydrolases superfamily protein;P-loop containing nucleoside triphosphate hydrolases superfamily protein;P-loop containing nucleoside triphosphate hydrolases superfamily protein
Wa8730a018g001290	-1.88127	1.96397e-36	2.73817e-32	0.071	0.333	AT2G40340;AT2G38340;AT5G05410;AT3G11020;AT5G18450	AtERF48, DREB2C;DREB19;DREB2, DREB2A;DREB2, DREB2B;	Encodes a member of the DREB subfamily A-2 of ERF/AP2 transcription factor family. The protein contains one AP2 domain. There are eight members in this subfamily including DREB2A AND DREB2B that are involved in response to drought.;encodes a member of the DREB subfamily A-2 of ERF/AP2 transcription factor family. The protein contains one AP2 domain. There are eight members in this subfamily inclu…
Wa8730a016g001550	-1.88914	3.41583e-48	4.76235e-44	0.247	0.569	AT1G35140;AT5G64260;AT5G09440;AT4G08950	EXL1, PHI-1;EXL2;EXL4;EXO	At1g35140 (At1g35140/T32G9_32) mRNA, complete cds;EXORDIUM like 2;EXORDIUM like 4;Phosphate-responsive 1 family protein
Wa8730a019g002340	-1.89181	2.40167e-25	3.3484e-21	0.109	0.318	AT4G15610;AT3G06390	;	Uncharacterised protein family (UPF0497);Uncharacterised protein family (UPF0497)
Wa8730a016g001560	-1.90281	7.47196e-40	1.04174e-35	0.256	0.546	AT1G35140;AT5G64260;AT5G09440;AT4G08950	EXL1, PHI-1;EXL2;EXL4;EXO	At1g35140 (At1g35140/T32G9_32) mRNA, complete cds;EXORDIUM like 2;EXORDIUM like 4;Phosphate-responsive 1 family protein
Wa8730a018g001940	-1.92614	4.84317e-40	6.75235e-36	0.109	0.397	AT2G41010;AT3G56880	ATCAMBP25, CAMBP25;	Encodes a novel calmodulin binding protein whose gene expression is induced by dehydration and ionic (salt) and non-ionic (mannitol) osmotic stress. Lines over-expressing this gene are more sensitive and anti-sense lines are more tolerant to osmotic stress, suggesting this gene may be a negative regulator of response to osmotic stress.;VQ motif-containing protein
Wa8730a002g001220	-1.93466	9.93938e-49	1.38575e-44	0.097	0.43	AT5G52640;AT4G24190;AT5G56030	ATHS83, ATHSP90.1, AtHsp90-1, HSP81-1, HSP81.1, HSP83, HSP90.1;AtHsp90-7, AtHsp90.7, HSP90.7, SHD;AtHsp90.2, ERD8, HSP81-2, HSP81.2, HSP90.2	Encodes a cytosolic heat shock protein AtHSP90.1. AtHSP90.1 interacts with disease resistance signaling components SGT1b and RAR1 and is required for RPS2-mediated resistance.;encodes an ortholog of GRP94, an ER-resident HSP90-like protein and is involved in regulation of meristem size and organization. Single and double mutant analyses suggest that SHD may be required for the correct folding and…
Wa8730a005g003750	-1.9368	1.68838e-38	2.35394e-34	0.102	0.383	AT3G25780	AOC3	Encodes allene oxide cyclase, one of the enzymes involved in jasmonic acid biosynthesis. One of four genes in Arabidopsis that encode this enzyme. mRNA expression is upregulated in senescing leaves. Note: Nomenclature for Arabidopsis allene oxide cyclase 3 (AOC3, AT3G25780) gene is based on Stenzel et al. 2003 Plant Molecular Biology 51:895-911. AOC3 (AT3G25780) is also referred to as AOC2 in He …
Wa8730a009g004130	-1.94226	4.18913e-27	5.84049e-23	0.117	0.339	AT1G02520;AT3G62150;AT4G01820;AT2G47000	ABCB11, MDR8, PGP11;ABCB21, PGP21;ABCB3, MDR3, PGP3;ABCB4, ATPGP4, AtABCB4, MDR4, PGP4	Encodes an ATP-binding cassette (ABC) transporter. Expressed in the vascular tissue of primary stem. The mRNA is cell-to-cell mobile.;Encodes a facultative transporter controlling auxin concentrations in plant cells.;member of MDR subfamily;Multidrug resistance P-glycoprotein (MDR/PGP) subfamily of ABC transporters. Functions in the basipetal redirection of auxin from the root tip. Exhibits apola…
Wa8730a017g002540	-1.95888	2.64122e-41	3.68239e-37	0.128	0.438	AT2G45960;AT3G61430;AT1G01620;AT4G00430;AT4G23400;AT2G37170;AT2G39010;AT4G35100;AT2G16850	ATHH2, PIP1;2, PIP1B, TMP-A;ATPIP1, PIP1, PIP1;1, PIP1A;PIP1;3, PIP1C, TMP-B;PIP1;4, PIP1E, TMP-C;PIP1;5, PIP1D;PIP2;2, PIP2B;PIP2;6, PIP2E;PIP2;7, PIP3, PIP3A, SIMIP;PIP2;8, PIP3B	a member of the plasma membrane intrinsic protein subfamily PIP1. localizes to the plasma membrane and exhibits water transport activity in Xenopus oocyte. expressed ubiquitously and protein level decreases slightly during leaf development.;a member of the plasma membrane intrinsic protein subfamily PIP1. localizes to the plasma membrane and exhibits water transport activity in Xenopus oocyte. ex…
Wa8730a007g004510	-1.96387	1.95045e-44	2.71931e-40	0.312	0.609	AT1G28200;AT5G13200	FIP1;	VirF-interacting protein FIP1;Encodes a protein with unknown function that is involved in hormone mediated regulation of seed germination/dormancy.
Wa8730a001g006070	-1.9803	2.82971e-64	3.94518e-60	0.228	0.619	AT3G10940	LSF2	Encodes a protein with a predicted dual-specificity phosphatase domain, similar to the glucan phosphorylases SEX4 and LSF1, however, it lacks the carbohydrate binding domain present in those proteins. Has phosphoglucan phosphatase activity. It binds to starch and specifically hydrolyzes phosphate from the C3-position.
Wa8730a012g001430	-1.99163	4.1225e-37	5.74758e-33	0.012	0.229	AT5G63450;AT3G48520;AT1G34540;AT5G08250	CYP94B1;CYP94B3;CYP94D1;	member of CYP94B;member of CYP94B;member of CYP94D;Cytochrome P450 superfamily protein
Wa8730a010g000800	-2.01062	5.95608e-61	8.30396e-57	0.04	0.401	AT4G26080;AT5G57050;AT1G72770;AT1G17550	ABI1, AtABI1;ABI2, AtABI2;AtHAB1, HAB1;AtHAB2, HAB2	Involved in abscisic acid (ABA) signal transduction. Negative regulator of ABA promotion of stomatal closure.;Encodes a protein phosphatase 2C and is involved in ABA signal transduction. Binds fibrillin preprotein in vitro and in vivo.;mutant has ABA hypersensitive inhibition of seed germination; Protein Phosphatase 2C; regulates the activation of the Snf1-related kinase OST1 by abscisic acid.;Pr…
Wa8730a013g001840	-2.0134	4.19729e-56	5.85187e-52	0.056	0.402	AT2G46620		P-loop containing nucleoside triphosphate hydrolases superfamily protein
Wa8730a004g008480	-2.01341	2.65024e-52	3.69496e-48	0.214	0.57	AT3G24500	ATMBF1C, MBF1C	One of three genes in A. thaliana encoding multiprotein bridging factor 1, a highly conserved transcriptional coactivator. May serve as a bridging factor between a bZIP factor and TBP. Its expression is specifically elevated in response to pathogen infection, salinity, drought, heat, hydrogen peroxide, and application of abscisic acid or salicylic acid. Constitutive expression enhances the tolera…
Wa8730a004g006810	-2.0209	3.85558e-51	5.37545e-47	0.169	0.514	AT5G44130	FLA13	FASCICLIN-like arabinogalactan protein 13 precursor
Wa8730a010g006490	-2.04096	1.54549e-81	2.15472e-77	0.657	0.874	AT4G28050;AT2G23810;AT4G30430	TET7;TET8;TET9	Member of TETRASPANIN family;Member of TETRASPANIN family;Member of TETRASPANIN family
Wa8730a002g001010	-2.07496	3.06043e-56	4.26686e-52	0.131	0.499	AT1G01570		Protein of unknown function (DUF604)
Wa8730a015g001570	-2.08311	1.01899e-34	1.42067e-30	0.177	0.457	AT5G48540		receptor-like protein kinase-related family protein
Wa8730a005g005240	-2.09902	2.01407e-57	2.80802e-53	0.287	0.643	AT5G42050		DCD (Development and Cell Death) domain protein
Wa8730a001g007370	-2.14834	1.06636e-74	1.48673e-70	0.266	0.685	AT4G31550;AT2G24570	ATWRKY11, WRKY11;ATWRKY17, WRKY17	member of WRKY Transcription Factor; Group II-d; negative regulator of basal resistance to Pseudomonas syringae.;member of WRKY Transcription Factor; Group II-d; negative regulator of basal resistance to Pseudomonas syringae.
Wa8730a004g000410	-2.15691	8.68616e-74	1.21102e-69	0.229	0.667	AT1G53170;AT3G23240;AT1G04370;AT2G31230	ATERF-8, ATERF8, ERF8;ATERF1, ERF1;ATERF14, ERF14;ATERF15, ERF15	encodes a member of the ERF (ethylene response factor) subfamily B-1 of ERF/AP2 transcription factor family (ATERF-8). The protein contains one AP2 domain. There are 15 members in this subfamily including ATERF-3, ATERF-4, ATERF-7, and leafy petiole.;encodes a member of the ERF (ethylene response factor) subfamily B-3 of ERF/AP2 transcription factor family (ERF1). The protein contains one AP2 dom…
Wa8730a019g000680	-2.17728	1.02057e-68	1.42288e-64	0.214	0.628	AT5G59820;AT2G37430;AT3G46090;AT2G28710;AT1G02030;AT5G03510;AT3G53600	AtZAT12, RHL41, ZAT12;ZAT11;ZAT7;;;;	Encodes a zinc finger protein involved in high light and cold acclimation. Overexpression of this putative transcription factor increases the expression level of 9 cold-responsive genes and represses the expression level of 15 cold-responsive genes, including CBF genes. Also, lines overexpressing this gene exhibits a small but reproducible increase in freeze tolerance. Because of the repression o…
Wa8730a014g005470	-2.18001	4.39662e-63	6.12976e-59	0.259	0.643	AT5G66050		Wound-responsive family protein
Wa8730a005g008260	-2.18889	4.33957e-56	6.05023e-52	0.15	0.52	AT1G70770;AT1G23170	;	Protein of unknown function DUF2359, transmembrane;Protein of unknown function DUF2359, transmembrane
Wa8730a013g004490	-2.19175	2.5539e-85	3.56064e-81	0.578	0.837	AT2G31570;AT3G63080;AT1G63460	ATGPX2, GPX2;ATGPX5, GPX5, MEE42;ATGPX8, GPX8	glutathione peroxidase GPx;Encodes glutathione peroxidase.;Encodes GPX8 (glutathione peroxidase 8). Involved in the suppression of oxidative damages in nucleus and cytosol. The mRNA is cell-to-cell mobile.
Wa8730a002g003450	-2.192	4.69267e-64	6.54252e-60	0.208	0.601	AT2G35710;AT4G16600	PGSIP7;PGSIP8	Nucleotide-diphospho-sugar transferases superfamily protein;Nucleotide-diphospho-sugar transferases superfamily protein
Wa8730a010g003440	-2.19203	4.18424e-67	5.83366e-63	0.203	0.614	AT3G49940;AT1G67100;AT3G02550;AT1G68510	LBD38;LBD40;LBD41;LBD42	LOB domain-containing protein 38;LOB domain-containing protein 40;LOB domain-containing protein 41;LOB domain-containing protein 42
Wa8730a005g006600	-2.20037	1.94457e-34	2.71111e-30	0.377	0.595	AT3G03270;AT5G14680;AT3G58450	;;	HRU1 is a hypoxia induced universal stress protein. It exists as two splice variants with AT3G03270.2 , which contains a putative dimerization domain, the predominant transcript found under anoxia. It is induced by RAP2.12. Subcellular localization is dynamic; under anoxia the localization of HRU1 shifts from cytoplasm to the plasma membrane.;Adenine nucleotide alpha hydrolases-like superfamily p…
Wa8730a003g005740	-2.20289	4.92837e-19	6.87114e-15	0.086	0.252	AT3G46860;AT5G43570	;	Predicted to encode a PR (pathogenesis-related) peptide that belongs to the PR-6 proteinase inhibitor family. Six putative PR-6-type protein encoding genes are found in Arabidopsis: At2g38900, At2g38870, At5g43570, At5g43580, At3g50020 and At3g46860.;Predicted to encode a PR (pathogenesis-related) peptide that belongs to the PR-6 proteinase inhibitor family. Six putative PR-6-type protein encodin…
Wa8730a001g006690	-2.20331	3.42203e-85	4.77099e-81	0.237	0.708	AT2G40180;AT2G30020;AT1G07160	ATHPP2C5, PP2C5;;	Encodes PP2C5, a member of the PP2C family phosphatases. PP2C5 acts as a MAPK phosphatase that positively regulates seed germination, stomatal closure and ABA-inducible gene expression.;Encodes AP2C1. Belongs to the clade B of the PP2C-superfamily. Acts as a MAPK phosphatase that negatively regulates MPK4 and MPK6.;Protein phosphatase 2C family protein
Wa8730a017g003480	-2.21622	5.46076e-75	7.61339e-71	0.386	0.742	AT5G03380;AT2G28090;AT2G36950	;;	Heavy metal transport/detoxification superfamily protein ;Heavy metal transport/detoxification superfamily protein ;Heavy metal transport/detoxification superfamily protein
Wa8730a010g005120	-2.22403	9.69783e-73	1.35207e-68	0.195	0.619	AT4G30600		signal recognition particle receptor alpha subunit family protein
Wa8730a019g002370	-2.22582	1.05205e-32	1.46677e-28	0.26	0.512	AT4G15610;AT3G06390	;	Uncharacterised protein family (UPF0497);Uncharacterised protein family (UPF0497)
Wa8730a018g000270	-2.28686	1.73931e-80	2.42495e-76	0.146	0.612	AT3G11410;AT1G07430;AT5G59220;AT2G29380	AHG3, ATPP2CA, PP2CA;AIP1, AtAIP1, HAI2, HON;HAI1, SAG113;HAI3	Encodes protein phosphatase 2C. Negative regulator of ABA signalling. Expressed in seeds during germination. mRNA up-regulated by drought and ABA.;Encodes a member of the group A protein phosphatase 2C (PP2C) family that is responsible for negatively regulating seed dormancy.;Encodes a member of the PP2C family (Clade A protein phosphatases type 2C). Functions as a negative regulator of osmotic s…
Wa8730a011g005230	-2.30582	1.80269e-63	2.51331e-59	0.149	0.541	AT4G31800;AT1G80840;AT2G25000	ATWRKY18, WRKY18;ATWRKY40, WRKY40;ATWRKY60, WRKY60	Pathogen-induced transcription factor. Binds W-box sequences in vitro. Forms protein complexes with itself and with WRKY40 and WRKY60. Constitutive expression of WRKY18 enhanced resistance to P. syringae, but its coexpression with WRKY40 or WRKY60 made plants more susceptible to both P. syringae and B. cinerea. WRKY18, WRKY40, and WRKY60 have partially redundant roles in response to the hemibiotr…
Wa8730a003g001330	-2.31458	1.68826e-50	2.35377e-46	0.112	0.457	AT4G37850;AT2G22750	;	basic helix-loop-helix (bHLH) DNA-binding superfamily protein;basic helix-loop-helix (bHLH) DNA-binding superfamily protein
Wa8730a003g005730	-2.32796	7.02777e-23	9.79812e-19	0.079	0.268	AT3G46860;AT5G43570	;	Predicted to encode a PR (pathogenesis-related) peptide that belongs to the PR-6 proteinase inhibitor family. Six putative PR-6-type protein encoding genes are found in Arabidopsis: At2g38900, At2g38870, At5g43570, At5g43580, At3g50020 and At3g46860.;Predicted to encode a PR (pathogenesis-related) peptide that belongs to the PR-6 proteinase inhibitor family. Six putative PR-6-type protein encodin…
Wa8730a020g000110	-2.3334	7.676e-68	1.07019e-63	0.044	0.431	AT1G71960;AT2G36380;AT1G66950	ABCG25, ATABCG25;ABCG34, ATPDR6, PDR6;ABCG39, ATPDR11, PDR11	Encodes a plasma membrane localized ABC transporter involved in abscisic acid transport and responses.;pleiotropic drug resistance 6;Encodes a plasma membrane-localized ABC transporter. Confers tolerance to herbicide paraquat.
Wa8730a014g001210	-2.34189	1.93919e-70	2.70362e-66	0.074	0.485	AT2G03450;AT1G13900	ATPAP9, PAP9;PAP2	purple acid phosphatase 9;Encodes a dual-localized acid phosphatase (mitochondria and chloroplast) that modulates carbon metabolism.
Wa8730a015g006070	-2.34714	1.05989e-55	1.4777e-51	0.071	0.417
Wa8730a011g004200	-2.35149	3.11027e-44	4.33634e-40	0.076	0.375
Wa8730a001g012130	-2.36139	7.0832e-56	9.8754e-52	0.267	0.627	AT3G54040		PAR1 protein
Wa8730a019g001830	-2.3653	3.7829e-132	5.27411e-128	0.584	0.919	AT1G01720;AT1G52890;AT4G27410	ANAC002, ATAF1;ANAC019, NAC019;ANAC072, RD26	Belongs to a large family of putative transcriptional activators with NAC domain. Transcript level increases in response to wounding and abscisic acid. ATAF1 attentuates ABA signaling and sythesis. Mutants are hyposensitive to ABA.;encodes a NAC transcription factor whose expression is induced by drought, high salt, and abscisic acid. This gene binds to ERD1 promoter in vitro.;Encodes a NAC trans…
Wa8730a004g003130	-2.37256	1.45014e-57	2.02179e-53	0.15	0.52	AT3G24540	AtPERK3, PERK3	Encodes a member of the proline-rich extensin-like receptor kinase (PERK) family. This family consists of 15 predicted receptor kinases (PMID: 15653807).
Wa8730a010g004450	-2.37683	3.11242e-41	4.33934e-37	0.101	0.393
Wa8730a007g000980	-2.39008	3.85652e-58	5.37675e-54	0.123	0.494	AT3G01770;AT5G14270;AT3G27260;AT5G63320	ATBET10, BET10;ATBET9, BET9;GTE8;NPX1	bromodomain and extraterminal domain protein 10;bromodomain and extraterminal domain protein 9;Kinase like protein with similarity to yeast BDF1 and human RING3 protein, which have two bromodomains GTE8 has a single bromodomain;Encodes NPX1 (Nuclear Protein X1), a nuclear factor regulating abscisic acid responses.
Wa8730a004g007490	-2.39644	3.1932e-96	4.45197e-92	0.467	0.84	AT3G24530		AAA-type ATPase family protein / ankyrin repeat family protein
Wa8730a006g003250	-2.39958	2.06834e-14	2.88367e-10	0.098	0.241	AT2G43590		Chitinase family protein
Wa8730a015g005970	-2.44038	1.24006e-60	1.7289e-56	0.131	0.517
Wa8730a001g000910	-2.5073	3.39752e-50	4.73682e-46	0.238	0.583
Wa8730a010g005650	-2.5323	5.83756e-94	8.13872e-90	0.264	0.73	AT3G19940		Encodes a hexose-H(+) symporter that catalyzes the high-affinity uptake of glucose, galactose and mannose that is induced under low-glucose conditions in pollen tubes.
Wa8730a015g003250	-2.53806	3.37272e-34	4.70225e-30	0.031	0.255	AT3G30842;AT1G15520	ABCG38, ATPDR10, PDR10;ABCG40, ATABCG40, ATPDR12, PDR12	pleiotropic drug resistance 10;ABC transporter family involved in ABA transport and resistance to lead. Localizes to plasma membrane. Upregulated by lead. Expressed in leaves, flowers, stomata and roots.
Wa8730a010g001420	-2.54464	2.65781e-51	3.70551e-47	0.071	0.402
Wa8730a015g004680	-2.67365	2.60972e-88	3.63847e-84	0.191	0.662	AT3G28340;AT1G13250;AT1G24170;AT1G70090	GATL10, GolS8;GATL3;GATL8, LGT9;GATL9, LGT8	Encodes a protein with putative galacturonosyltransferase activity.;Encodes a protein with putative galacturonosyltransferase activity.;Encodes a protein with putative galacturonosyltransferase activity.;Encodes a protein with putative galacturonosyltransferase activity.
Wa8730a014g001820	-2.79998	1.13642e-88	1.5844e-84	0.134	0.619	AT1G74800;AT1G27120	;	Encodes a Golgi-localized hydroxyproline galactosyltransferase GALT5. Functions together with GALT2 as redundant GALTs that control AGP (arabinogalactan-proteins) O-glycosylation, which is essential for normal growth and development. Mutants display multiple phenotypes including reduced root hair growth.;Encodes a Golgi-localized hydroxyproline-O-galactosyltransferase.
Wa8730a016g003310	-2.80195	2.71015e-66	3.77849e-62	0.044	0.423	AT3G14310;AT4G33220;AT1G11580;AT4G02330;AT1G23200;AT5G20860;AT3G60730;AT1G02810;AT4G15980	ATPME3, OZS2, PME3;ATPME44, PME44;ATPMEPCRA, PMEPCRA;ATPMEPCRB, AtPME41, PME41;;;;;	encodes a pectin methylesterase, targeted by a cellulose binding protein (CBP) from the parasitic nematode Heterodera schachtii during parasitism.;pectin methylesterase 44;methylesterase PCR A;Encodes a pectin methylesterase that is sensitive to chilling stress and brassinosteroid regulation.;Encodes a pectin methyl esterase involved in embryo development.;Plant invertase/pectin methylesterase in…
Wa8730a015g001560	-2.81361	3.79063e-72	5.2849e-68	0.178	0.607	AT5G48540		receptor-like protein kinase-related family protein
Wa8730a007g007160	-2.82093	5.33827e-73	7.44261e-69	0.04	0.443	AT1G35660
Wa8730a019g001460	-2.8815	9.31243e-112	1.29834e-107	0.109	0.674	AT2G30490;AT2G40890	ATC4H, C4H, CYP73A5, REF3;CYP98A3	Encodes a cinnamate-4-hydroxylase. Mutations in this gene impact phenylpropanoid metabolism, growth and development.;encodes coumarate 3-hydroxylase (C3H), a P450-dependent monooxygenase. Involved in lignin biosynthesis and flavonoid biosynthesis. Also affects the biosynthesis of coumarins such as scopoletin and scopolin as a branching-out-pathway from the phenylpropanoid acid level.
Wa8730a012g004810	-2.94629	2.94585e-120	4.10711e-116	0.277	0.806	AT5G65110	ACX2, ATACX2	Encodes an acyl-CoA oxidase presumably involved in long chain fatty acid biosynthesis.
Wa8730a013g001140	-2.9782	1.23361e-96	1.7199e-92	0.312	0.756	AT5G47120;AT4G17580	ATBI-1, ATBI1, BI-1, BI1;	Encodes BI-1, a homolog of mammalian Bax inhibitor 1. Functions as an attenuator of biotic and abiotic types of cell death. Bax-induced cell death can be downregulated by ectopically expressing AtBI in planta.;Bax inhibitor-1 family protein
Wa8730a015g003240	-2.98631	1.53333e-79	2.13778e-75	0.074	0.519	AT3G30842;AT1G15520	ABCG38, ATPDR10, PDR10;ABCG40, ATABCG40, ATPDR12, PDR12	pleiotropic drug resistance 10;ABC transporter family involved in ABA transport and resistance to lead. Localizes to plasma membrane. Upregulated by lead. Expressed in leaves, flowers, stomata and roots.
Wa8730a004g002910	-3.07175	7.48697e-61	1.04383e-56	0.09	0.465	AT5G42180;AT4G25980;AT4G30170;AT4G17690;AT4G36430;AT5G19880;AT4G11290	PER64;;;;;;	Peroxidase superfamily protein;Peroxidase superfamily protein;Peroxidase family protein;Peroxidase superfamily protein;Peroxidase superfamily protein;Peroxidase superfamily protein;Peroxidase superfamily protein
Wa8730a008g005470	-3.42163	3.85064e-125	5.36856e-121	0.432	0.879	AT5G54500;AT4G36750;AT4G27270	FQR1;;	Encodes a flavin mononucleotide-binding flavodoxin-like quinone reductase that is a primary auxin-response gene.;Quinone reductase family protein;Quinone reductase family protein

## Sheet: SC A GO (vs SC C)
Dataset S3. Enriched GO terms for Differentially Expressed Genes for Dusk Supercluster A versus Supercluster C
GO	Name	Ratio in Study	Ratio in Pop.	p Value	Depth	Study Count	p Value (BH-FDR)	Study Items
GO:0010025	wax biosynthetic process	12/168	48/13944	3.01e-13	5	12	1.37e-09	Wa8730a011g004580, Wa8730a011g004700, Wa8730a011g004730, Wa8730a011g004850, Wa8730a012g005240, Wa8730a013g005120, Wa8730a013g005140, Wa8730a014g005820, Wa8730a015g005080, Wa8730a015g005520, Wa8730a016g003000, Wa8730a018g002300
GO:0010166	wax metabolic process	12/168	49/13944	3.95e-13	4	12	1.37e-09	Wa8730a011g004580, Wa8730a011g004700, Wa8730a011g004730, Wa8730a011g004850, Wa8730a012g005240, Wa8730a013g005120, Wa8730a013g005140, Wa8730a014g005820, Wa8730a015g005080, Wa8730a015g005520, Wa8730a016g003000, Wa8730a018g002300
GO:1901570	fatty acid derivative biosynthetic process	12/168	51/13944	6.66e-13	4	12	1.53e-09	Wa8730a011g004580, Wa8730a011g004700, Wa8730a011g004730, Wa8730a011g004850, Wa8730a012g005240, Wa8730a013g005120, Wa8730a013g005140, Wa8730a014g005820, Wa8730a015g005080, Wa8730a015g005520, Wa8730a016g003000, Wa8730a018g002300
GO:1901568	fatty acid derivative metabolic process	12/168	61/13944	6.58e-12	3	12	1.14e-08	Wa8730a011g004580, Wa8730a011g004700, Wa8730a011g004730, Wa8730a011g004850, Wa8730a012g005240, Wa8730a013g005120, Wa8730a013g005140, Wa8730a014g005820, Wa8730a015g005080, Wa8730a015g005520, Wa8730a016g003000, Wa8730a018g002300
GO:0120251	hydrocarbon biosynthetic process	8/168	21/13944	6.69e-11	4	8	9.25e-08	Wa8730a001g011890, Wa8730a008g003940, Wa8730a011g004580, Wa8730a011g004700, Wa8730a011g004730, Wa8730a013g005120, Wa8730a013g005140, Wa8730a018g002300
GO:0120252	hydrocarbon metabolic process	8/168	27/13944	6.86e-10	3	8	7.91e-07	Wa8730a001g011890, Wa8730a008g003940, Wa8730a011g004580, Wa8730a011g004700, Wa8730a011g004730, Wa8730a013g005120, Wa8730a013g005140, Wa8730a018g002300
GO:0006723	cuticle hydrocarbon biosynthetic process	6/168	12/13944	2.43e-09	5	6	1.87e-06	Wa8730a011g004580, Wa8730a011g004700, Wa8730a011g004730, Wa8730a013g005120, Wa8730a013g005140, Wa8730a018g002300
GO:0043446	cellular alkane metabolic process	6/168	12/13944	2.43e-09	4	6	1.87e-06	Wa8730a011g004580, Wa8730a011g004700, Wa8730a011g004730, Wa8730a013g005120, Wa8730a013g005140, Wa8730a018g002300
GO:0043447	alkane biosynthetic process	6/168	12/13944	2.43e-09	5	6	1.87e-06	Wa8730a011g004580, Wa8730a011g004700, Wa8730a011g004730, Wa8730a013g005120, Wa8730a013g005140, Wa8730a018g002300
GO:0006629	lipid metabolic process	22/168	428/13944	9.35e-09	3	22	6.47e-06	Wa8730a001g008780, Wa8730a006g002600, Wa8730a006g004490, Wa8730a007g004870, Wa8730a008g002540, Wa8730a010g004870, Wa8730a011g004580, Wa8730a011g004700, Wa8730a011g004730, Wa8730a011g004850, Wa8730a012g003090, Wa8730a013g002080, Wa8730a013g005120, Wa8730a013g005140, Wa8730a015g005080, Wa8730a015g005520, Wa8730a016g002030, Wa8730a017g002740, Wa8730a018g002300, Wa8730a018g003530, Wa8730a020g002750, …
GO:0048235	pollen sperm cell differentiation	6/168	29/13944	1.06e-06	4	6	0.000664	Wa8730a011g004580, Wa8730a011g004700, Wa8730a011g004730, Wa8730a013g005120, Wa8730a013g005140, Wa8730a018g002300
GO:0042335	cuticle development	6/168	30/13944	1.31e-06	3	6	0.000753	Wa8730a011g004580, Wa8730a011g004700, Wa8730a011g004730, Wa8730a013g005120, Wa8730a013g005140, Wa8730a018g002300
GO:1901576	organic substance biosynthetic process	35/168	1255/13944	2.05e-06	3	35	0.001089	Wa8730a001g004070, Wa8730a001g008780, Wa8730a001g011890, Wa8730a003g005060, Wa8730a003g005260, Wa8730a005g001350, Wa8730a006g000440, Wa8730a006g002600, Wa8730a006g004490, Wa8730a008g002540, Wa8730a008g003940, Wa8730a009g001620, Wa8730a010g002940, Wa8730a011g004580, Wa8730a011g004700, Wa8730a011g004730, Wa8730a011g004850, Wa8730a012g003090, Wa8730a012g005240, Wa8730a013g002080, Wa8730a013g005120, …
GO:0009058	biosynthetic process	35/168	1302/13944	5.6e-06	2	35	0.002767	Wa8730a001g004070, Wa8730a001g008780, Wa8730a001g011890, Wa8730a003g005060, Wa8730a003g005260, Wa8730a005g001350, Wa8730a006g000440, Wa8730a006g002600, Wa8730a006g004490, Wa8730a008g002540, Wa8730a008g003940, Wa8730a009g001620, Wa8730a010g002940, Wa8730a011g004580, Wa8730a011g004700, Wa8730a011g004730, Wa8730a011g004850, Wa8730a012g003090, Wa8730a012g005240, Wa8730a013g002080, Wa8730a013g005120, …
GO:0044255	cellular lipid metabolic process	16/168	378/13944	1.34e-05	4	16	0.00584	Wa8730a001g008780, Wa8730a006g002600, Wa8730a006g004490, Wa8730a007g004870, Wa8730a008g002540, Wa8730a010g004870, Wa8730a011g004850, Wa8730a012g003090, Wa8730a013g002080, Wa8730a015g005080, Wa8730a015g005520, Wa8730a016g002030, Wa8730a017g002740, Wa8730a018g003530, Wa8730a020g002750, Wa8730a020g002800
GO:0055046	microgametogenesis	6/168	44/13944	1.35e-05	2	6	0.00584	Wa8730a011g004580, Wa8730a011g004700, Wa8730a011g004730, Wa8730a013g005120, Wa8730a013g005140, Wa8730a018g002300
GO:0042761	very long-chain fatty acid biosynthetic process	4/168	18/13944	5.45e-05	9	4	0.021091	Wa8730a006g004490, Wa8730a008g002540, Wa8730a020g002750, Wa8730a020g002800
GO:0006633	fatty acid biosynthetic process	6/168	56/13944	5.52e-05	8	6	0.021091	Wa8730a001g008780, Wa8730a006g004490, Wa8730a008g002540, Wa8730a018g003530, Wa8730a020g002750, Wa8730a020g002800
GO:0009813	flavonoid biosynthetic process	5/168	35/13944	5.8e-05	4	5	0.021091	Wa8730a001g004070, Wa8730a009g001620, Wa8730a015g004980, Wa8730a018g000750, Wa8730a019g003490
GO:0006631	fatty acid metabolic process	8/168	113/13944	6.57e-05	7	8	0.021858	Wa8730a001g008780, Wa8730a006g004490, Wa8730a008g002540, Wa8730a010g004870, Wa8730a016g002030, Wa8730a018g003530, Wa8730a020g002750, Wa8730a020g002800
GO:0008610	lipid biosynthetic process	12/168	259/13944	7.1e-05	4	12	0.021858	Wa8730a001g008780, Wa8730a006g002600, Wa8730a006g004490, Wa8730a008g002540, Wa8730a011g004850, Wa8730a012g003090, Wa8730a013g002080, Wa8730a015g005080, Wa8730a015g005520, Wa8730a018g003530, Wa8730a020g002750, Wa8730a020g002800
GO:0048232	male gamete generation	6/168	67/13944	0.000152	4	6	0.042673	Wa8730a011g004580, Wa8730a011g004700, Wa8730a011g004730, Wa8730a013g005120, Wa8730a013g005140, Wa8730a018g002300
GO:0080167	response to karrikin	6/168	68/13944	0.000165	3	6	0.042673	Wa8730a003g006990, Wa8730a006g005060, Wa8730a009g001620, Wa8730a012g005240, Wa8730a015g004980, Wa8730a018g000750
GO:0009812	flavonoid metabolic process	5/168	44/13944	0.000178	3	5	0.042673	Wa8730a001g004070, Wa8730a009g001620, Wa8730a015g004980, Wa8730a018g000750, Wa8730a019g003490
GO:0000038	very long-chain fatty acid metabolic process	4/168	24/13944	0.000179	8	4	0.042673	Wa8730a006g004490, Wa8730a008g002540, Wa8730a020g002750, Wa8730a020g002800
GO:0043170	macromolecule metabolic process	12/168	2515/13944	6.96e-05	3	12	0.021858	Wa8730a001g010900, Wa8730a005g005630, Wa8730a006g001790, Wa8730a008g003940, Wa8730a008g004200, Wa8730a010g002940, Wa8730a013g004070, Wa8730a015g003690, Wa8730a017g002740, Wa8730a017g003810, Wa8730a018g001000, Wa8730a019g003750
GO:0090304	nucleic acid metabolic process	2/168	1196/13944	7.27e-05	5	2	0.021858	Wa8730a006g001790, Wa8730a010g002940
GO:0006996	organelle organization	1/168	954/13944	0.000158	4	1	0.042673	Wa8730a017g002730
GO:0046483	heterocycle metabolic process	5/168	1543/13944	0.000175	3	5	0.042673	Wa8730a006g000440, Wa8730a006g001790, Wa8730a010g002940, Wa8730a013g002080, Wa8730a018g003530
GO:0005783	endoplasmic reticulum	26/168	549/13944	2.07e-09	5	26	2.22e-06	Wa8730a001g011890, Wa8730a002g009950, Wa8730a003g006990, Wa8730a006g004490, Wa8730a007g004870, Wa8730a007g006900, Wa8730a008g002540, Wa8730a009g001620, Wa8730a009g001730, Wa8730a011g004580, Wa8730a011g004700, Wa8730a011g004730, Wa8730a011g004850, Wa8730a013g005120, Wa8730a013g005140, Wa8730a014g005820, Wa8730a015g005080, Wa8730a015g005520, Wa8730a016g003000, Wa8730a017g002740, Wa8730a018g000750, …
GO:0012505	endomembrane system	29/168	1104/13944	6.55e-05	2	29	0.035187	Wa8730a001g011890, Wa8730a002g009950, Wa8730a003g006990, Wa8730a005g001350, Wa8730a005g003480, Wa8730a006g004490, Wa8730a007g004870, Wa8730a007g006900, Wa8730a008g002540, Wa8730a009g001620, Wa8730a009g001730, Wa8730a011g004580, Wa8730a011g004700, Wa8730a011g004730, Wa8730a011g004850, Wa8730a013g005120, Wa8730a013g005140, Wa8730a014g005820, Wa8730a015g001060, Wa8730a015g005080, Wa8730a015g005520, …
GO:0045703	ketoreductase activity	4/168	8/13944	1.37e-06	4	4	0.002785	Wa8730a006g004490, Wa8730a020g002750, Wa8730a020g002780, Wa8730a020g002800
GO:0009922	fatty acid elongase activity	4/168	9/13944	2.44e-06	6	4	0.002785	Wa8730a003g005060, Wa8730a003g005260, Wa8730a014g005820, Wa8730a016g003000
GO:0016746	transferase activity, transferring acyl groups	10/168	129/13944	3.53e-06	3	10	0.002785	Wa8730a003g005060, Wa8730a003g005260, Wa8730a010g004870, Wa8730a011g004850, Wa8730a013g002080, Wa8730a014g005820, Wa8730a015g005080, Wa8730a015g005520, Wa8730a016g003000, Wa8730a018g003530
GO:0016491	oxidoreductase activity	18/168	465/13944	1.28e-05	2	18	0.006066	Wa8730a001g008780, Wa8730a001g010900, Wa8730a001g011890, Wa8730a006g004320, Wa8730a006g004490, Wa8730a007g006900, Wa8730a008g004210, Wa8730a011g004580, Wa8730a011g004700, Wa8730a011g004730, Wa8730a013g005120, Wa8730a013g005140, Wa8730a017g002740, Wa8730a018g002300, Wa8730a019g001620, Wa8730a020g002750, Wa8730a020g002780, Wa8730a020g002800
GO:0004312	fatty acid synthase activity	4/168	15/13944	2.5e-05	5	4	0.009862	Wa8730a003g005060, Wa8730a003g005260, Wa8730a014g005820, Wa8730a016g003000
GO:0018454	acetoacetyl-CoA reductase activity	3/168	7/13944	5.8e-05	5	3	0.019606	Wa8730a006g004490, Wa8730a020g002750, Wa8730a020g002800
GO:0016747	transferase activity, transferring acyl groups other than amino-acyl groups	8/168	118/13944	8.93e-05	4	8	0.026404	Wa8730a003g005060, Wa8730a003g005260, Wa8730a010g004870, Wa8730a011g004850, Wa8730a014g005820, Wa8730a015g005080, Wa8730a015g005520, Wa8730a016g003000
GO:0045430	chalcone isomerase activity	2/168	2/13944	0.000144	4	2	0.03792	Wa8730a009g001620, Wa8730a018g000750
GO:0005515	protein binding	0/168	980/13944	1e-05	2	0	0.005927

## Sheet: SC C GO (vs SC A)
Dataset S3. Enriched GO terms for Differentially Expressed Genes for Dusk Supercluster C versus Supercluster A
GO	Name	Ratio in Study	Ratio in Pop.	p Value	Depth	Study Count	p Value (BH-FDR)	Study Items
GO:0046520	sphingoid biosynthetic process	8/109	15/13944	6.60503e-14	8	8	4.56738e-10	Wa8730a009g003140, Wa8730a009g003160, Wa8730a009g003220, Wa8730a012g005020, Wa8730a014g001670, Wa8730a014g002160, Wa8730a014g002170, Wa8730a014g002180
GO:0046519	sphingoid metabolic process	9/109	27/13944	3.24626e-13	7	9	1.12239e-09	Wa8730a009g003140, Wa8730a009g003160, Wa8730a009g003220, Wa8730a012g005020, Wa8730a014g001670, Wa8730a014g002160, Wa8730a014g002170, Wa8730a014g002180, Wa8730a016g000390
GO:0030148	sphingolipid biosynthetic process	9/109	36/13944	6.15132e-12	7	9	1.41788e-08	Wa8730a009g003140, Wa8730a009g003160, Wa8730a009g003220, Wa8730a012g005020, Wa8730a014g001670, Wa8730a014g002160, Wa8730a014g002170, Wa8730a014g002180, Wa8730a016g000390
GO:0097164	ammonium ion metabolic process	9/109	42/13944	2.80237e-11	3	9	4.8446e-08	Wa8730a009g003140, Wa8730a009g003160, Wa8730a009g003220, Wa8730a012g005020, Wa8730a014g001670, Wa8730a014g002160, Wa8730a014g002170, Wa8730a014g002180, Wa8730a016g000390
GO:0006665	sphingolipid metabolic process	9/109	44/13944	4.39817e-11	6	9	6.08267e-08	Wa8730a009g003140, Wa8730a009g003160, Wa8730a009g003220, Wa8730a012g005020, Wa8730a014g001670, Wa8730a014g002160, Wa8730a014g002170, Wa8730a014g002180, Wa8730a016g000390
GO:0046467	membrane lipid biosynthetic process	9/109	66/13944	1.99129e-09	6	9	2.29496e-06	Wa8730a009g003140, Wa8730a009g003160, Wa8730a009g003220, Wa8730a012g005020, Wa8730a014g001670, Wa8730a014g002160, Wa8730a014g002170, Wa8730a014g002180, Wa8730a016g000390
GO:0009640	photomorphogenesis	8/109	47/13944	2.62486e-09	6	8	2.59298e-06	Wa8730a009g003140, Wa8730a009g003160, Wa8730a009g003220, Wa8730a012g005020, Wa8730a014g001670, Wa8730a014g002160, Wa8730a014g002170, Wa8730a014g002180
GO:0006643	membrane lipid metabolic process	9/109	73/13944	4.99126e-09	5	9	4.31432e-06	Wa8730a009g003140, Wa8730a009g003160, Wa8730a009g003220, Wa8730a012g005020, Wa8730a014g001670, Wa8730a014g002160, Wa8730a014g002170, Wa8730a014g002180, Wa8730a016g000390
GO:0055085	transmembrane transport	18/109	504/13944	6.48499e-08	4	18	4.98263e-05	Wa8730a001g006060, Wa8730a001g006600, Wa8730a002g003240, Wa8730a004g001070, Wa8730a005g003170, Wa8730a006g002120, Wa8730a008g003840, Wa8730a008g004040, Wa8730a009g004350, Wa8730a010g000090, Wa8730a011g002640, Wa8730a011g003030, Wa8730a011g003440, Wa8730a012g004900, Wa8730a015g003240, Wa8730a015g003250, Wa8730a015g004730, Wa8730a017g002540
GO:0034220	ion transmembrane transport	15/109	408/13944	6.29682e-07	5	15	0.000435425	Wa8730a001g006060, Wa8730a001g006600, Wa8730a002g003240, Wa8730a004g001070, Wa8730a005g003170, Wa8730a006g002120, Wa8730a008g003840, Wa8730a008g004040, Wa8730a010g000090, Wa8730a011g002640, Wa8730a011g003030, Wa8730a011g003440, Wa8730a012g004900, Wa8730a015g004730, Wa8730a017g002540
GO:0009639	response to red or far red light	8/109	97/13944	8.73594e-07	5	8	0.000549173	Wa8730a009g003140, Wa8730a009g003160, Wa8730a009g003220, Wa8730a012g005020, Wa8730a014g001670, Wa8730a014g002160, Wa8730a014g002170, Wa8730a014g002180
GO:0010167	response to nitrate	4/109	16/13944	5.98114e-06	4	4	0.00301507	Wa8730a002g003240, Wa8730a004g001070, Wa8730a006g002120, Wa8730a016g001990
GO:0006810	transport	22/109	984/13944	6.10427e-06	3	22	0.00301507	Wa8730a001g006060, Wa8730a001g006600, Wa8730a002g003240, Wa8730a003g004980, Wa8730a004g001070, Wa8730a005g003170, Wa8730a006g002120, Wa8730a008g003840, Wa8730a008g004040, Wa8730a009g003530, Wa8730a009g004260, Wa8730a009g004310, Wa8730a009g004350, Wa8730a010g000090, Wa8730a011g002640, Wa8730a011g003030, Wa8730a011g003440, Wa8730a012g004900, Wa8730a015g003240, Wa8730a015g003250, Wa8730a015g004730, …
GO:0051234	establishment of localization	22/109	1017/13944	1.03167e-05	2	22	0.004756	Wa8730a001g006060, Wa8730a001g006600, Wa8730a002g003240, Wa8730a003g004980, Wa8730a004g001070, Wa8730a005g003170, Wa8730a006g002120, Wa8730a008g003840, Wa8730a008g004040, Wa8730a009g003530, Wa8730a009g004260, Wa8730a009g004310, Wa8730a009g004350, Wa8730a010g000090, Wa8730a011g002640, Wa8730a011g003030, Wa8730a011g003440, Wa8730a012g004900, Wa8730a015g003240, Wa8730a015g003250, Wa8730a015g004730, …
GO:0006811	ion transport	17/109	656/13944	1.25222e-05	4	17	0.00541196	Wa8730a001g006060, Wa8730a001g006600, Wa8730a002g003240, Wa8730a003g004980, Wa8730a004g001070, Wa8730a005g003170, Wa8730a006g002120, Wa8730a008g003840, Wa8730a008g004040, Wa8730a009g003530, Wa8730a010g000090, Wa8730a011g002640, Wa8730a011g003030, Wa8730a011g003440, Wa8730a012g004900, Wa8730a015g004730, Wa8730a017g002540
GO:0015698	inorganic anion transport	5/109	40/13944	1.4084e-05	6	5	0.00572887	Wa8730a002g003240, Wa8730a004g001070, Wa8730a006g002120, Wa8730a011g002640, Wa8730a012g004900
GO:0009416	response to light stimulus	13/109	418/13944	2.24819e-05	4	13	0.0085772	Wa8730a001g006760, Wa8730a001g006770, Wa8730a009g003140, Wa8730a009g003160, Wa8730a009g003220, Wa8730a010g005880, Wa8730a012g005020, Wa8730a014g001670, Wa8730a014g002160, Wa8730a014g002170, Wa8730a014g002180, Wa8730a015g004370, Wa8730a016g002350
GO:0098660	inorganic ion transmembrane transport	9/109	197/13944	2.35671e-05	6	9	0.0085772	Wa8730a001g006600, Wa8730a005g003170, Wa8730a008g003840, Wa8730a008g004040, Wa8730a011g002640, Wa8730a011g003030, Wa8730a011g003440, Wa8730a012g004900, Wa8730a015g004730
GO:0008610	lipid biosynthetic process	10/109	259/13944	3.48828e-05	4	10	0.0118556	Wa8730a005g001430, Wa8730a009g003140, Wa8730a009g003160, Wa8730a009g003220, Wa8730a012g005020, Wa8730a014g001670, Wa8730a014g002160, Wa8730a014g002170, Wa8730a014g002180, Wa8730a016g000390
GO:0051179	localization	22/109	1103/13944	3.63158e-05	1	22	0.0118556	Wa8730a001g006060, Wa8730a001g006600, Wa8730a002g003240, Wa8730a003g004980, Wa8730a004g001070, Wa8730a005g003170, Wa8730a006g002120, Wa8730a008g003840, Wa8730a008g004040, Wa8730a009g003530, Wa8730a009g004260, Wa8730a009g004310, Wa8730a009g004350, Wa8730a010g000090, Wa8730a011g002640, Wa8730a011g003030, Wa8730a011g003440, Wa8730a012g004900, Wa8730a015g003240, Wa8730a015g003250, Wa8730a015g004730, …
GO:0015706	nitrate transport	3/109	9/13944	3.77185e-05	7	3	0.0118556	Wa8730a002g003240, Wa8730a004g001070, Wa8730a006g002120
GO:0009314	response to radiation	13/109	460/13944	6.04673e-05	3	13	0.0181796	Wa8730a001g006760, Wa8730a001g006770, Wa8730a009g003140, Wa8730a009g003160, Wa8730a009g003220, Wa8730a010g005880, Wa8730a012g005020, Wa8730a014g001670, Wa8730a014g002160, Wa8730a014g002170, Wa8730a014g002180, Wa8730a015g004370, Wa8730a016g002350
GO:1901566	organonitrogen compound biosynthetic process	14/109	548/13944	9.16966e-05	4	14	0.0264201	Wa8730a001g006760, Wa8730a001g006770, Wa8730a005g002760, Wa8730a009g000440, Wa8730a009g003140, Wa8730a009g003160, Wa8730a009g003220, Wa8730a012g005020, Wa8730a014g001670, Wa8730a014g002160, Wa8730a014g002170, Wa8730a014g002180, Wa8730a015g004730, Wa8730a016g000390
GO:0043170	macromolecule metabolic process	3/109	2515/13944	1.93353e-06	3	3	0.0011142	Wa8730a009g001780, Wa8730a011g003440, Wa8730a013g005770
GO:0044260	cellular macromolecule metabolic process	2/109	1707/13944	0.000172509	4	2	0.047716	Wa8730a011g003440, Wa8730a013g005770
GO:0016020	membrane	39/109	2296/13944	8.19362e-07	2	39	0.000491509	Wa8730a001g006600, Wa8730a001g007510, Wa8730a001g007820, Wa8730a002g003240, Wa8730a003g003040, Wa8730a003g004980, Wa8730a004g001070, Wa8730a004g001700, Wa8730a005g002760, Wa8730a005g003170, Wa8730a006g002120, Wa8730a008g003840, Wa8730a008g004040, Wa8730a009g000440, Wa8730a009g003140, Wa8730a009g003160, Wa8730a009g003220, Wa8730a009g003530, Wa8730a009g004350, Wa8730a010g000090, Wa8730a011g002640, …
GO:0071944	cell periphery	29/109	1421/13944	9.15286e-07	2	29	0.000491509	Wa8730a001g006600, Wa8730a001g007090, Wa8730a001g007820, Wa8730a002g003240, Wa8730a003g003040, Wa8730a004g001070, Wa8730a004g001700, Wa8730a005g002760, Wa8730a005g003170, Wa8730a006g002120, Wa8730a006g004140, Wa8730a006g004370, Wa8730a008g003840, Wa8730a009g000440, Wa8730a009g003530, Wa8730a009g004260, Wa8730a009g004310, Wa8730a009g004350, Wa8730a011g002640, Wa8730a011g003030, Wa8730a011g003440, …
GO:0055044	symplast	14/109	419/13944	4.68724e-06	2	14	0.000961565	Wa8730a001g007090, Wa8730a003g003040, Wa8730a004g001700, Wa8730a005g003170, Wa8730a006g004140, Wa8730a006g004370, Wa8730a009g000440, Wa8730a009g003530, Wa8730a009g004260, Wa8730a009g004310, Wa8730a009g004350, Wa8730a013g005830, Wa8730a017g002190, Wa8730a017g002540
GO:0009506	plasmodesma	14/109	419/13944	4.68724e-06	5	14	0.000961565	Wa8730a001g007090, Wa8730a003g003040, Wa8730a004g001700, Wa8730a005g003170, Wa8730a006g004140, Wa8730a006g004370, Wa8730a009g000440, Wa8730a009g003530, Wa8730a009g004260, Wa8730a009g004310, Wa8730a009g004350, Wa8730a013g005830, Wa8730a017g002190, Wa8730a017g002540
GO:0070161	anchoring junction	14/109	424/13944	5.37187e-06	3	14	0.000961565	Wa8730a001g007090, Wa8730a003g003040, Wa8730a004g001700, Wa8730a005g003170, Wa8730a006g004140, Wa8730a006g004370, Wa8730a009g000440, Wa8730a009g003530, Wa8730a009g004260, Wa8730a009g004310, Wa8730a009g004350, Wa8730a013g005830, Wa8730a017g002190, Wa8730a017g002540
GO:0005911	cell-cell junction	14/109	424/13944	5.37187e-06	4	14	0.000961565	Wa8730a001g007090, Wa8730a003g003040, Wa8730a004g001700, Wa8730a005g003170, Wa8730a006g004140, Wa8730a006g004370, Wa8730a009g000440, Wa8730a009g003530, Wa8730a009g004260, Wa8730a009g004310, Wa8730a009g004350, Wa8730a013g005830, Wa8730a017g002190, Wa8730a017g002540
GO:0030054	cell junction	14/109	435/13944	7.20007e-06	2	14	0.0011047	Wa8730a001g007090, Wa8730a003g003040, Wa8730a004g001700, Wa8730a005g003170, Wa8730a006g004140, Wa8730a006g004370, Wa8730a009g000440, Wa8730a009g003530, Wa8730a009g004260, Wa8730a009g004310, Wa8730a009g004350, Wa8730a013g005830, Wa8730a017g002190, Wa8730a017g002540
GO:0005886	plasma membrane	23/109	1185/13944	3.58221e-05	3	23	0.00480911	Wa8730a001g006600, Wa8730a001g007820, Wa8730a002g003240, Wa8730a003g003040, Wa8730a004g001070, Wa8730a004g001700, Wa8730a005g002760, Wa8730a005g003170, Wa8730a006g002120, Wa8730a008g003840, Wa8730a009g000440, Wa8730a009g003530, Wa8730a009g004350, Wa8730a011g002640, Wa8730a011g003030, Wa8730a011g003440, Wa8730a012g004900, Wa8730a013g005830, Wa8730a015g003240, Wa8730a015g003250, Wa8730a016g002350, …
GO:0005789	endoplasmic reticulum membrane	9/109	232/13944	8.4237e-05	4	9	0.00833261	Wa8730a009g003140, Wa8730a009g003160, Wa8730a009g003220, Wa8730a012g005020, Wa8730a014g001670, Wa8730a014g002160, Wa8730a014g002170, Wa8730a014g002180, Wa8730a016g000390
GO:0042175	nuclear outer membrane-endoplasmic reticulum membrane network	9/109	233/13944	8.70569e-05	3	9	0.00833261	Wa8730a009g003140, Wa8730a009g003160, Wa8730a009g003220, Wa8730a012g005020, Wa8730a014g001670, Wa8730a014g002160, Wa8730a014g002170, Wa8730a014g002180, Wa8730a016g000390
GO:0098827	endoplasmic reticulum subcompartment	9/109	235/13944	9.29354e-05	3	9	0.00833261	Wa8730a009g003140, Wa8730a009g003160, Wa8730a009g003220, Wa8730a012g005020, Wa8730a014g001670, Wa8730a014g002160, Wa8730a014g002170, Wa8730a014g002180, Wa8730a016g000390
GO:0005618	cell wall	10/109	293/13944	9.80634e-05	3	10	0.00833261	Wa8730a001g007090, Wa8730a004g001700, Wa8730a005g003170, Wa8730a006g004140, Wa8730a006g004370, Wa8730a009g000440, Wa8730a009g003530, Wa8730a009g004260, Wa8730a009g004310, Wa8730a013g004170
GO:0030312	external encapsulating structure	10/109	294/13944	0.00010086	2	10	0.00833261	Wa8730a001g007090, Wa8730a004g001700, Wa8730a005g003170, Wa8730a006g004140, Wa8730a006g004370, Wa8730a009g000440, Wa8730a009g003530, Wa8730a009g004260, Wa8730a009g004310, Wa8730a013g004170
GO:0031090	organelle membrane	17/109	847/13944	0.000294755	3	17	0.0226119	Wa8730a001g006600, Wa8730a001g007510, Wa8730a004g001070, Wa8730a005g003170, Wa8730a009g000440, Wa8730a009g003140, Wa8730a009g003160, Wa8730a009g003220, Wa8730a009g004350, Wa8730a010g000090, Wa8730a012g005020, Wa8730a013g005830, Wa8730a014g001670, Wa8730a014g002160, Wa8730a014g002170, Wa8730a014g002180, Wa8730a016g000390
GO:0005794	Golgi apparatus	12/109	475/13944	0.000332675	5	12	0.0238195	Wa8730a001g006600, Wa8730a004g001700, Wa8730a005g003170, Wa8730a009g003140, Wa8730a009g003160, Wa8730a009g003220, Wa8730a009g003530, Wa8730a012g005020, Wa8730a014g001670, Wa8730a014g002160, Wa8730a014g002170, Wa8730a014g002180
GO:0005576	extracellular region	8/109	230/13944	0.000440976	2	8	0.0296005	Wa8730a003g005480, Wa8730a009g000440, Wa8730a009g003530, Wa8730a010g002420, Wa8730a013g004170, Wa8730a013g005830, Wa8730a016g000390, Wa8730a016g001990
GO:0009505	plant-type cell wall	6/109	130/13944	0.000540577	4	6	0.0322926	Wa8730a001g007090, Wa8730a004g001700, Wa8730a005g003170, Wa8730a006g004140, Wa8730a006g004370, Wa8730a009g003530
GO:0031226	intrinsic component of plasma membrane	7/109	181/13944	0.000541217	3	7	0.0322926	Wa8730a003g003040, Wa8730a004g001700, Wa8730a005g003170, Wa8730a011g002640, Wa8730a012g004900, Wa8730a017g002190, Wa8730a017g002540
GO:0042284	sphingolipid delta-4 desaturase activity	8/109	11/13944	1.73795e-15	4	8	4.11025e-12	Wa8730a009g003140, Wa8730a009g003160, Wa8730a009g003220, Wa8730a012g005020, Wa8730a014g001670, Wa8730a014g002160, Wa8730a014g002170, Wa8730a014g002180
GO:0016705	oxidoreductase activity, acting on paired donors, with incorporation or reduction of molecular oxygen	11/109	91/13944	1.1189e-10	3	11	1.3231e-07	Wa8730a005g001430, Wa8730a009g003140, Wa8730a009g003160, Wa8730a009g003220, Wa8730a012g005020, Wa8730a013g001900, Wa8730a014g001670, Wa8730a014g002160, Wa8730a014g002170, Wa8730a014g002180, Wa8730a015g000910
GO:0016491	oxidoreductase activity	19/109	465/13944	3.002e-09	2	19	2.36658e-06	Wa8730a001g007090, Wa8730a005g001430, Wa8730a006g004140, Wa8730a006g004370, Wa8730a009g003140, Wa8730a009g003160, Wa8730a009g003220, Wa8730a012g005020, Wa8730a013g001900, Wa8730a013g005830, Wa8730a014g001670, Wa8730a014g002160, Wa8730a014g002170, Wa8730a014g002180, Wa8730a015g000910, Wa8730a016g000390, Wa8730a016g001990, Wa8730a016g002350, Wa8730a018g002950
GO:0022857	transmembrane transporter activity	16/109	432/13944	2.32012e-07	2	16	0.000129458	Wa8730a001g006060, Wa8730a001g006600, Wa8730a002g003240, Wa8730a004g001070, Wa8730a005g003170, Wa8730a006g002120, Wa8730a008g003840, Wa8730a008g004040, Wa8730a009g004350, Wa8730a010g000090, Wa8730a011g002640, Wa8730a011g003030, Wa8730a012g004900, Wa8730a015g003240, Wa8730a015g003250, Wa8730a017g002540
GO:0005215	transporter activity	17/109	495/13944	2.73696e-07	1	17	0.000129458	Wa8730a001g006060, Wa8730a001g006600, Wa8730a002g003240, Wa8730a004g001070, Wa8730a005g003170, Wa8730a006g002120, Wa8730a008g003840, Wa8730a008g004040, Wa8730a009g003530, Wa8730a009g004350, Wa8730a010g000090, Wa8730a011g002640, Wa8730a011g003030, Wa8730a012g004900, Wa8730a015g003240, Wa8730a015g003250, Wa8730a017g002540
GO:0015075	ion transmembrane transporter activity	12/109	331/13944	1.04504e-05	3	12	0.00367516	Wa8730a001g006060, Wa8730a001g006600, Wa8730a002g003240, Wa8730a004g001070, Wa8730a005g003170, Wa8730a006g002120, Wa8730a008g003840, Wa8730a008g004040, Wa8730a010g000090, Wa8730a011g002640, Wa8730a011g003030, Wa8730a012g004900
GO:0015103	inorganic anion transmembrane transporter activity	5/109	38/13944	1.08779e-05	5	5	0.00367516	Wa8730a002g003240, Wa8730a004g001070, Wa8730a006g002120, Wa8730a011g002640, Wa8730a012g004900
GO:0015112	nitrate transmembrane transporter activity	3/109	8/13944	2.52897e-05	6	3	0.00747626	Wa8730a002g003240, Wa8730a004g001070, Wa8730a006g002120
GO:0015318	inorganic molecular entity transmembrane transporter activity	10/109	271/13944	5.11605e-05	3	10	0.0134438	Wa8730a002g003240, Wa8730a004g001070, Wa8730a005g003170, Wa8730a006g002120, Wa8730a008g003840, Wa8730a008g004040, Wa8730a011g002640, Wa8730a011g003030, Wa8730a012g004900, Wa8730a017g002540
GO:0015250	water channel activity	3/109	13/13944	0.000125525	5	3	0.0269879	Wa8730a005g003170, Wa8730a011g002640, Wa8730a017g002540
GO:0005372	water transmembrane transporter activity	3/109	13/13944	0.000125525	4	3	0.0269879	Wa8730a005g003170, Wa8730a011g002640, Wa8730a017g002540
GO:0008509	anion transmembrane transporter activity	8/109	206/13944	0.000209983	4	8	0.0413842	Wa8730a001g006060, Wa8730a002g003240, Wa8730a004g001070, Wa8730a005g003170, Wa8730a006g002120, Wa8730a010g000090, Wa8730a011g002640, Wa8730a012g004900

## Sheet: SC B GO (vs SC D)
Dataset S3. Enriched GO terms for Differentially Expressed Genes for Dusk Supercluster B versus Supercluster D
GO	Name	Ratio in Study	Ratio in Pop.	p Value	Depth	Study Count	p Value (BH-FDR)	Study Items
GO:0009768	photosynthesis, light harvesting in photosystem I	4/38	14/13944	4.60199e-08	5	4	0.000318228	Wa8730a001g008310, Wa8730a004g004970, Wa8730a006g005790, Wa8730a009g005910
GO:0009765	photosynthesis, light harvesting	4/38	31/13944	1.39935e-06	4	4	0.00357195	Wa8730a001g008310, Wa8730a004g004970, Wa8730a006g005790, Wa8730a009g005910
GO:0071280	cellular response to copper ion	2/38	2/13944	7.23172e-06	6	2	0.00357195	Wa8730a005g005360, Wa8730a010g002220
GO:0031115	negative regulation of microtubule polymerization	2/38	2/13944	7.23172e-06	10	2	0.00357195	Wa8730a005g005360, Wa8730a010g002220
GO:0006498	N-terminal protein lipidation	2/38	2/13944	7.23172e-06	8	2	0.00357195	Wa8730a005g005360, Wa8730a010g002220
GO:0031117	positive regulation of microtubule depolymerization	2/38	2/13944	7.23172e-06	10	2	0.00357195	Wa8730a005g005360, Wa8730a010g002220
GO:0018377	protein myristoylation	2/38	2/13944	7.23172e-06	8	2	0.00357195	Wa8730a005g005360, Wa8730a010g002220
GO:0010350	cellular response to magnesium starvation	2/38	2/13944	7.23172e-06	7	2	0.00357195	Wa8730a005g005360, Wa8730a010g002220
GO:0071325	cellular response to mannitol stimulus	2/38	2/13944	7.23172e-06	6	2	0.00357195	Wa8730a005g005360, Wa8730a010g002220
GO:0035864	response to potassium ion	2/38	2/13944	7.23172e-06	5	2	0.00357195	Wa8730a005g005360, Wa8730a010g002220
GO:0035865	cellular response to potassium ion	2/38	2/13944	7.23172e-06	6	2	0.00357195	Wa8730a005g005360, Wa8730a010g002220
GO:0072709	cellular response to sorbitol	2/38	2/13944	7.23172e-06	6	2	0.00357195	Wa8730a005g005360, Wa8730a010g002220
GO:0009769	photosynthesis, light harvesting in photosystem II	2/38	2/13944	7.23172e-06	5	2	0.00357195	Wa8730a004g004970, Wa8730a009g005910
GO:0006499	N-terminal protein myristoylation	2/38	2/13944	7.23172e-06	9	2	0.00357195	Wa8730a005g005360, Wa8730a010g002220
GO:0031111	negative regulation of microtubule polymerization or depolymerization	2/38	3/13944	2.16578e-05	9	2	0.00713161	Wa8730a005g005360, Wa8730a010g002220
GO:0071286	cellular response to magnesium ion	2/38	3/13944	2.16578e-05	6	2	0.00713161	Wa8730a005g005360, Wa8730a010g002220
GO:1901881	positive regulation of protein depolymerization	2/38	3/13944	2.16578e-05	7	2	0.00713161	Wa8730a005g005360, Wa8730a010g002220
GO:0031114	regulation of microtubule depolymerization	2/38	3/13944	2.16578e-05	9	2	0.00713161	Wa8730a005g005360, Wa8730a010g002220
GO:0075733	intracellular transport of virus	2/38	3/13944	2.16578e-05	6	2	0.00713161	Wa8730a005g005360, Wa8730a010g002220
GO:0032026	response to magnesium ion	2/38	3/13944	2.16578e-05	5	2	0.00713161	Wa8730a005g005360, Wa8730a010g002220
GO:0043243	positive regulation of protein-containing complex disassembly	2/38	3/13944	2.16578e-05	6	2	0.00713161	Wa8730a005g005360, Wa8730a010g002220
GO:0009409	response to cold	6/38	220/13944	2.60835e-05	4	6	0.00819853	Wa8730a001g008310, Wa8730a005g003920, Wa8730a005g005360, Wa8730a009g005910, Wa8730a010g002220, Wa8730a012g004780
GO:0009735	response to cytokinin	5/38	135/13944	3.0665e-05	5	5	0.00921949	Wa8730a001g008310, Wa8730a005g003920, Wa8730a005g005360, Wa8730a010g002220, Wa8730a013g005830
GO:0019684	photosynthesis, light reaction	4/38	72/13944	4.22362e-05	4	4	0.010679	Wa8730a001g008310, Wa8730a004g004970, Wa8730a006g005790, Wa8730a009g005910
GO:0031112	positive regulation of microtubule polymerization or depolymerization	2/38	4/13944	4.32411e-05	9	2	0.010679	Wa8730a005g005360, Wa8730a010g002220
GO:0031113	regulation of microtubule polymerization	2/38	4/13944	4.32411e-05	9	2	0.010679	Wa8730a005g005360, Wa8730a010g002220
GO:0072708	response to sorbitol	2/38	4/13944	4.32411e-05	5	2	0.010679	Wa8730a005g005360, Wa8730a010g002220
GO:0051511	negative regulation of unidimensional cell growth	2/38	4/13944	4.32411e-05	7	2	0.010679	Wa8730a005g005360, Wa8730a010g002220
GO:0031110	regulation of microtubule polymerization or depolymerization	2/38	5/13944	7.19445e-05	8	2	0.017155	Wa8730a005g005360, Wa8730a010g002220
GO:0015979	photosynthesis	4/38	86/13944	8.48334e-05	3	4	0.0195541	Wa8730a001g008310, Wa8730a004g004970, Wa8730a006g005790, Wa8730a009g005910
GO:0006091	generation of precursor metabolites and energy	5/38	172/13944	9.72594e-05	3	5	0.0216951	Wa8730a001g008310, Wa8730a004g004970, Wa8730a006g005790, Wa8730a009g005910, Wa8730a013g005830
GO:0019058	viral life cycle	2/38	6/13944	0.000107731	4	2	0.0225745	Wa8730a005g005360, Wa8730a010g002220
GO:0046794	transport of virus	2/38	6/13944	0.000107731	5	2	0.0225745	Wa8730a005g005360, Wa8730a010g002220
GO:0070507	regulation of microtubule cytoskeleton organization	2/38	7/13944	0.000150564	7	2	0.0289208	Wa8730a005g005360, Wa8730a010g002220
GO:0046688	response to copper ion	2/38	7/13944	0.000150564	5	2	0.0289208	Wa8730a005g005360, Wa8730a010g002220
GO:0071219	cellular response to molecule of bacterial origin	2/38	7/13944	0.000150564	5	2	0.0289208	Wa8730a005g005360, Wa8730a010g002220
GO:0010555	response to mannitol	2/38	8/13944	0.000200407	5	2	0.0346453	Wa8730a005g005360, Wa8730a010g002220
GO:0044766	multi-organism transport	2/38	8/13944	0.000200407	4	2	0.0346453	Wa8730a005g005360, Wa8730a010g002220
GO:1902579	multi-organism localization	2/38	8/13944	0.000200407	2	2	0.0346453	Wa8730a005g005360, Wa8730a010g002220
GO:0009645	response to low light intensity stimulus	2/38	8/13944	0.000200407	6	2	0.0346453	Wa8730a001g008310, Wa8730a009g005910
GO:0009266	response to temperature stimulus	6/38	321/13944	0.00021061	3	6	0.0355212	Wa8730a001g008310, Wa8730a005g003920, Wa8730a005g005360, Wa8730a009g005910, Wa8730a010g002220, Wa8730a012g004780
GO:0032886	regulation of microtubule-based process	2/38	9/13944	0.000257223	4	2	0.0423499	Wa8730a005g005360, Wa8730a010g002220
GO:0010287	plastoglobule	4/38	53/13944	1.24756e-05	2	4	0.0133988	Wa8730a001g008310, Wa8730a004g004970, Wa8730a006g005790, Wa8730a009g005910
GO:0031409	pigment binding	4/38	13/13944	3.29356e-08	2	4	7.78927e-05	Wa8730a001g008310, Wa8730a004g004970, Wa8730a006g005790, Wa8730a009g005910
GO:0016168	chlorophyll binding	4/38	16/13944	8.33464e-08	4	4	9.85572e-05	Wa8730a001g008310, Wa8730a004g004970, Wa8730a006g005790, Wa8730a009g005910
GO:0046906	tetrapyrrole binding	4/38	27/13944	7.86621e-07	3	4	0.00062012	Wa8730a001g008310, Wa8730a004g004970, Wa8730a006g005790, Wa8730a009g005910
GO:0043325	phosphatidylinositol-3,4-bisphosphate binding	2/38	2/13944	7.23172e-06	4	2	0.00427576	Wa8730a005g005360, Wa8730a010g002220
GO:0005547	phosphatidylinositol-3,4,5-trisphosphate binding	2/38	3/13944	2.16578e-05	6	2	0.0102441	Wa8730a005g005360, Wa8730a010g002220
GO:0080025	phosphatidylinositol-3,5-bisphosphate binding	2/38	6/13944	0.000107731	7	2	0.042464	Wa8730a005g005360, Wa8730a010g002220
GO:0043168	anion binding	6/38	298/13944	0.000140587	3	6	0.0474985	Wa8730a001g008310, Wa8730a004g004970, Wa8730a005g005360, Wa8730a006g005790, Wa8730a009g005910, Wa8730a010g002220

## Sheet: SC D GO (vs SC B)
Dataset S3. Enriched GO terms for Differentially Expressed Genes for Dusk Supercluster D versus Supercluster B
GO	Name	Ratio in Study	Ratio in Pop.	p Value	Depth	Study Count	p Value (BH-FDR)	Study Items
GO:0010200	response to chitin	13/241	68/13944	1.20065e-10	5	13	8.30247e-07	Wa8730a001g003830, Wa8730a001g007370, Wa8730a003g006850, Wa8730a006g000510, Wa8730a011g003790, Wa8730a012g004840, Wa8730a015g000740, Wa8730a015g002550, Wa8730a015g006060, Wa8730a019g000660, Wa8730a019g000680, Wa8730a019g000700, Wa8730a019g001080
GO:1901700	response to oxygen-containing compound	41/241	795/13944	2.48372e-10	3	41	8.58745e-07	Wa8730a001g001150, Wa8730a001g003830, Wa8730a001g004430, Wa8730a001g007370, Wa8730a001g011840, Wa8730a003g001270, Wa8730a003g004240, Wa8730a003g006850, Wa8730a004g000410, Wa8730a004g005870, Wa8730a004g006020, Wa8730a004g008480, Wa8730a005g003750, Wa8730a006g000510, Wa8730a007g000980, Wa8730a007g002940, Wa8730a009g003530, Wa8730a009g003680, Wa8730a010g000800, Wa8730a010g001140, Wa8730a010g001420, …
GO:0042493	response to drug	23/241	288/13944	1.03489e-09	3	23	2.38541e-06	Wa8730a001g003830, Wa8730a001g004430, Wa8730a001g007370, Wa8730a003g006850, Wa8730a004g008620, Wa8730a005g003750, Wa8730a006g000510, Wa8730a009g004130, Wa8730a010g001420, Wa8730a010g004460, Wa8730a011g003790, Wa8730a012g004840, Wa8730a014g004410, Wa8730a015g000740, Wa8730a015g002550, Wa8730a015g006060, Wa8730a017g002000, Wa8730a018g001290, Wa8730a019g000660, Wa8730a019g000680, Wa8730a019g000700, …
GO:0042221	response to chemical	53/241	1392/13944	2.62451e-08	2	53	4.53711e-05	Wa8730a001g001150, Wa8730a001g003830, Wa8730a001g004430, Wa8730a001g007370, Wa8730a001g011840, Wa8730a002g005830, Wa8730a003g001270, Wa8730a003g004240, Wa8730a003g006850, Wa8730a004g000410, Wa8730a004g002910, Wa8730a004g005870, Wa8730a004g006020, Wa8730a004g008480, Wa8730a004g008620, Wa8730a005g003750, Wa8730a005g004220, Wa8730a006g000510, Wa8730a006g003250, Wa8730a007g000980, Wa8730a007g002940, …
GO:0010243	response to organonitrogen compound	15/241	146/13944	3.37299e-08	4	15	4.66485e-05	Wa8730a001g003830, Wa8730a001g007370, Wa8730a003g006850, Wa8730a005g003750, Wa8730a006g000510, Wa8730a006g003250, Wa8730a011g003790, Wa8730a012g004840, Wa8730a015g000740, Wa8730a015g002550, Wa8730a015g006060, Wa8730a019g000660, Wa8730a019g000680, Wa8730a019g000700, Wa8730a019g001080
GO:0001101	response to acid chemical	29/241	578/13944	2.48133e-07	3	29	0.000190649	Wa8730a001g001150, Wa8730a001g004430, Wa8730a001g011840, Wa8730a003g001270, Wa8730a003g004240, Wa8730a004g000410, Wa8730a004g005870, Wa8730a004g006020, Wa8730a004g008480, Wa8730a005g003750, Wa8730a006g000510, Wa8730a007g000980, Wa8730a007g002940, Wa8730a009g003530, Wa8730a009g003680, Wa8730a010g000800, Wa8730a010g001140, Wa8730a010g003440, Wa8730a010g004460, Wa8730a011g003790, Wa8730a013g001140, …
GO:0009414	response to water deprivation	15/241	177/13944	4.30802e-07	5	15	0.000270818	Wa8730a001g001150, Wa8730a003g001270, Wa8730a004g005870, Wa8730a004g006020, Wa8730a004g008480, Wa8730a007g002940, Wa8730a009g003530, Wa8730a009g003680, Wa8730a010g000800, Wa8730a011g003790, Wa8730a013g001140, Wa8730a013g005360, Wa8730a018g000270, Wa8730a018g001290, Wa8730a019g001080
GO:0009415	response to water	15/241	180/13944	5.34994e-07	4	15	0.00030829	Wa8730a001g001150, Wa8730a003g001270, Wa8730a004g005870, Wa8730a004g006020, Wa8730a004g008480, Wa8730a007g002940, Wa8730a009g003530, Wa8730a009g003680, Wa8730a010g000800, Wa8730a011g003790, Wa8730a013g001140, Wa8730a013g005360, Wa8730a018g000270, Wa8730a018g001290, Wa8730a019g001080
GO:0010033	response to organic substance	38/241	939/13944	7.85342e-07	3	38	0.000387903	Wa8730a001g003830, Wa8730a001g004430, Wa8730a001g007370, Wa8730a001g011840, Wa8730a002g005830, Wa8730a003g001270, Wa8730a003g004240, Wa8730a003g006850, Wa8730a004g000410, Wa8730a004g005870, Wa8730a004g006020, Wa8730a004g008480, Wa8730a005g003750, Wa8730a006g000510, Wa8730a006g003250, Wa8730a007g000980, Wa8730a007g002940, Wa8730a009g004130, Wa8730a010g000800, Wa8730a010g001140, Wa8730a010g003440, …
GO:1901698	response to nitrogen compound	16/241	218/13944	1.22881e-06	3	16	0.000566484	Wa8730a001g003830, Wa8730a001g007370, Wa8730a003g006850, Wa8730a004g005870, Wa8730a005g003750, Wa8730a006g000510, Wa8730a006g003250, Wa8730a011g003790, Wa8730a012g004840, Wa8730a015g000740, Wa8730a015g002550, Wa8730a015g006060, Wa8730a019g000660, Wa8730a019g000680, Wa8730a019g000700, Wa8730a019g001080
GO:0010035	response to inorganic substance	25/241	495/13944	1.57713e-06	3	25	0.000681614	Wa8730a001g001150, Wa8730a003g001270, Wa8730a004g005870, Wa8730a004g006020, Wa8730a004g008480, Wa8730a005g003750, Wa8730a006g003250, Wa8730a007g002940, Wa8730a009g003530, Wa8730a009g003680, Wa8730a010g000800, Wa8730a010g001420, Wa8730a010g004460, Wa8730a011g003790, Wa8730a013g001140, Wa8730a013g004490, Wa8730a013g005360, Wa8730a014g005560, Wa8730a016g003850, Wa8730a018g000270, Wa8730a018g001290, …
GO:0070887	cellular response to chemical stimulus	26/241	541/13944	2.41694e-06	3	26	0.000983127	Wa8730a001g003830, Wa8730a001g004430, Wa8730a001g011840, Wa8730a003g001270, Wa8730a003g004240, Wa8730a004g000410, Wa8730a004g002910, Wa8730a004g005870, Wa8730a004g006020, Wa8730a004g008480, Wa8730a004g008620, Wa8730a005g003750, Wa8730a005g004220, Wa8730a006g000510, Wa8730a010g000800, Wa8730a010g001140, Wa8730a013g004490, Wa8730a015g002550, Wa8730a015g006060, Wa8730a017g002670, Wa8730a018g000270, …
GO:0009737	response to abscisic acid	17/241	270/13944	4.64836e-06	5	17	0.00169176	Wa8730a001g011840, Wa8730a003g001270, Wa8730a003g004240, Wa8730a004g005870, Wa8730a004g006020, Wa8730a004g008480, Wa8730a005g003750, Wa8730a006g000510, Wa8730a007g000980, Wa8730a007g002940, Wa8730a010g000800, Wa8730a011g003790, Wa8730a017g002540, Wa8730a017g002670, Wa8730a018g000270, Wa8730a018g001130, Wa8730a018g001290
GO:0097305	response to alcohol	17/241	276/13944	6.23103e-06	4	17	0.00215438	Wa8730a001g011840, Wa8730a003g001270, Wa8730a003g004240, Wa8730a004g005870, Wa8730a004g006020, Wa8730a004g008480, Wa8730a005g003750, Wa8730a006g000510, Wa8730a007g000980, Wa8730a007g002940, Wa8730a010g000800, Wa8730a011g003790, Wa8730a017g002540, Wa8730a017g002670, Wa8730a018g000270, Wa8730a018g001130, Wa8730a018g001290
GO:0071289	cellular response to nickel ion	3/241	5/13944	4.97014e-05	6	3	0.0132187	Wa8730a019g000660, Wa8730a019g000680, Wa8730a019g000700
GO:0010045	response to nickel cation	3/241	5/13944	4.97014e-05	5	3	0.0132187	Wa8730a019g000660, Wa8730a019g000680, Wa8730a019g000700
GO:0033993	response to lipid	18/241	375/13944	9.31109e-05	4	18	0.0229951	Wa8730a001g011840, Wa8730a003g001270, Wa8730a003g004240, Wa8730a004g005870, Wa8730a004g006020, Wa8730a004g008480, Wa8730a005g003750, Wa8730a006g000510, Wa8730a007g000980, Wa8730a007g002940, Wa8730a010g000800, Wa8730a010g003440, Wa8730a011g003790, Wa8730a017g002540, Wa8730a017g002670, Wa8730a018g000270, Wa8730a018g001130, Wa8730a018g001290
GO:0007154	cell communication	26/241	672/13944	0.000108869	2	26	0.0257211	Wa8730a001g004430, Wa8730a001g011840, Wa8730a003g001270, Wa8730a003g004240, Wa8730a004g000410, Wa8730a004g005870, Wa8730a004g006020, Wa8730a004g008480, Wa8730a004g008620, Wa8730a005g003750, Wa8730a006g000510, Wa8730a007g000980, Wa8730a009g005900, Wa8730a010g000800, Wa8730a010g001140, Wa8730a013g001140, Wa8730a014g006110, Wa8730a015g002550, Wa8730a015g006060, Wa8730a017g002670, Wa8730a017g003290, …
GO:0009408	response to heat	9/241	109/13944	0.00011261	4	9	0.0257211	Wa8730a004g008480, Wa8730a006g002900, Wa8730a010g001420, Wa8730a018g001290, Wa8730a018g002050, Wa8730a019g000660, Wa8730a019g000680, Wa8730a019g000700, Wa8730a019g001080
GO:0071229	cellular response to acid chemical	12/241	190/13944	0.000116301	4	12	0.0257211	Wa8730a001g004430, Wa8730a001g011840, Wa8730a003g001270, Wa8730a003g004240, Wa8730a004g000410, Wa8730a004g006020, Wa8730a005g003750, Wa8730a006g000510, Wa8730a010g000800, Wa8730a010g001140, Wa8730a017g002670, Wa8730a018g000270
GO:0009755	hormone-mediated signaling pathway	13/241	220/13944	0.000119028	5	13	0.0257211	Wa8730a001g011840, Wa8730a003g001270, Wa8730a003g004240, Wa8730a004g000410, Wa8730a004g005870, Wa8730a004g008480, Wa8730a005g003750, Wa8730a006g000510, Wa8730a010g000800, Wa8730a010g001140, Wa8730a017g002670, Wa8730a018g000270, Wa8730a018g000340
GO:0009631	cold acclimation	4/241	17/13944	0.000173518	5	4	0.0363599	Wa8730a004g006020, Wa8730a019g000660, Wa8730a019g000680, Wa8730a019g000700
GO:0071495	cellular response to endogenous stimulus	15/241	293/13944	0.000179316	3	15	0.0364697	Wa8730a001g004430, Wa8730a001g011840, Wa8730a003g001270, Wa8730a003g004240, Wa8730a004g000410, Wa8730a004g005870, Wa8730a004g008480, Wa8730a005g003750, Wa8730a006g000510, Wa8730a010g000800, Wa8730a010g001140, Wa8730a015g006060, Wa8730a017g002670, Wa8730a018g000270, Wa8730a018g000340
GO:0034641	cellular nitrogen compound metabolic process	6/241	1681/13944	1.1916e-07	3	6	0.000137332	Wa8730a003g006350, Wa8730a005g003350, Wa8730a007g000380, Wa8730a015g004730, Wa8730a017g003290, Wa8730a019g001080
GO:0090304	nucleic acid metabolic process	2/241	1196/13944	1.65119e-07	5	2	0.000163114	Wa8730a003g006350, Wa8730a007g000380
GO:0046483	heterocycle metabolic process	5/241	1543/13944	2.14889e-07	3	5	0.000185745	Wa8730a003g006350, Wa8730a007g000380, Wa8730a015g004730, Wa8730a017g003290, Wa8730a019g001080
GO:0006139	nucleobase-containing compound metabolic process	4/241	1390/13944	3.58079e-07	4	4	0.000247612	Wa8730a003g006350, Wa8730a007g000380, Wa8730a015g004730, Wa8730a017g003290
GO:0006807	nitrogen compound metabolic process	21/241	2865/13944	7.24963e-07	2	21	0.000385625	Wa8730a001g003830, Wa8730a001g004200, Wa8730a003g006350, Wa8730a003g006850, Wa8730a005g003350, Wa8730a006g002900, Wa8730a007g000380, Wa8730a009g005900, Wa8730a010g000800, Wa8730a011g003790, Wa8730a014g001980, Wa8730a014g006110, Wa8730a015g003100, Wa8730a015g004730, Wa8730a015g004800, Wa8730a015g006060, Wa8730a017g002000, Wa8730a017g002670, Wa8730a017g003290, Wa8730a018g000270, Wa8730a019g001080
GO:1901360	organic cyclic compound metabolic process	8/241	1662/13944	2.90987e-06	3	8	0.00111788	Wa8730a003g006350, Wa8730a004g002910, Wa8730a005g004220, Wa8730a007g000380, Wa8730a015g001540, Wa8730a015g004730, Wa8730a017g003290, Wa8730a019g001080
GO:0006725	cellular aromatic compound metabolic process	8/241	1595/13944	8.45447e-06	3	8	0.00278394	Wa8730a003g006350, Wa8730a004g002910, Wa8730a005g004220, Wa8730a007g000380, Wa8730a015g001540, Wa8730a015g004730, Wa8730a017g003290, Wa8730a019g001080
GO:0016070	RNA metabolic process	2/241	923/13944	1.89834e-05	6	2	0.00596682	Wa8730a003g006350, Wa8730a007g000380
GO:0043170	macromolecule metabolic process	20/241	2515/13944	2.09482e-05	3	20	0.00629813	Wa8730a001g003830, Wa8730a001g004200, Wa8730a001g006070, Wa8730a002g003450, Wa8730a003g006350, Wa8730a003g006850, Wa8730a005g005110, Wa8730a006g002900, Wa8730a007g000380, Wa8730a009g005900, Wa8730a010g000800, Wa8730a013g005360, Wa8730a014g001980, Wa8730a014g006110, Wa8730a015g003100, Wa8730a015g004680, Wa8730a015g004800, Wa8730a015g006060, Wa8730a017g002670, Wa8730a018g000270
GO:0044238	primary metabolic process	29/241	3163/13944	3.4093e-05	2	29	0.00982306	Wa8730a001g003830, Wa8730a001g004200, Wa8730a001g006070, Wa8730a002g003450, Wa8730a002g009830, Wa8730a003g004430, Wa8730a003g006350, Wa8730a003g006850, Wa8730a006g002900, Wa8730a007g000380, Wa8730a009g005900, Wa8730a010g000800, Wa8730a012g004810, Wa8730a013g001140, Wa8730a013g005140, Wa8730a013g005360, Wa8730a014g001980, Wa8730a014g006110, Wa8730a015g003100, Wa8730a015g004680, Wa8730a015g004730, …
GO:0010467	gene expression	1/241	720/13944	8.63482e-05	4	1	0.0221147	Wa8730a003g006350
GO:0071704	organic substance metabolic process	36/241	3470/13944	0.000213028	2	36	0.0420883	Wa8730a001g003830, Wa8730a001g004200, Wa8730a001g006070, Wa8730a002g003450, Wa8730a002g009830, Wa8730a003g004430, Wa8730a003g006350, Wa8730a003g006850, Wa8730a004g002910, Wa8730a005g003750, Wa8730a005g004220, Wa8730a005g005110, Wa8730a006g002900, Wa8730a007g000380, Wa8730a009g005900, Wa8730a010g000800, Wa8730a011g003790, Wa8730a012g004810, Wa8730a013g001140, Wa8730a013g005140, Wa8730a013g005360, …
GO:0005886	plasma membrane	39/241	1185/13944	9.2791e-05	3	39	0.0498288	Wa8730a001g003830, Wa8730a001g005100, Wa8730a002g004460, Wa8730a003g004240, Wa8730a003g006290, Wa8730a004g008230, Wa8730a004g008620, Wa8730a005g003750, Wa8730a005g006600, Wa8730a005g006990, Wa8730a006g003250, Wa8730a006g005110, Wa8730a007g000440, Wa8730a007g008470, Wa8730a009g003530, Wa8730a009g004130, Wa8730a009g006210, Wa8730a010g001140, Wa8730a010g004460, Wa8730a010g005650, Wa8730a011g000990, …
GO:0032991	protein-containing complex	6/241	1331/13944	2.11742e-05	1	6	0.0227411	Wa8730a003g006350, Wa8730a005g003350, Wa8730a007g000380, Wa8730a015g004800, Wa8730a019g000710, Wa8730a019g000760
GO:0003700	DNA-binding transcription factor activity	24/241	519/13944	1.15164e-05	2	24	0.0148402	Wa8730a001g004430, Wa8730a001g005110, Wa8730a001g007370, Wa8730a003g001270, Wa8730a003g001330, Wa8730a004g000410, Wa8730a004g005870, Wa8730a004g008480, Wa8730a006g000510, Wa8730a007g000440, Wa8730a010g001140, Wa8730a011g003790, Wa8730a012g004840, Wa8730a014g000450, Wa8730a014g005560, Wa8730a015g000740, Wa8730a015g002550, Wa8730a018g000340, Wa8730a018g001290, Wa8730a018g002050, Wa8730a019g000660, …
GO:0042626	ATPase-coupled transmembrane transporter activity	9/241	87/13944	1.88248e-05	5	9	0.0148402	Wa8730a001g005100, Wa8730a004g008230, Wa8730a004g008240, Wa8730a005g006990, Wa8730a009g004130, Wa8730a009g006210, Wa8730a015g003240, Wa8730a015g003250, Wa8730a020g000110
GO:0015399	primary active transmembrane transporter activity	9/241	87/13944	1.88248e-05	4	9	0.0148402	Wa8730a001g005100, Wa8730a004g008230, Wa8730a004g008240, Wa8730a005g006990, Wa8730a009g004130, Wa8730a009g006210, Wa8730a015g003240, Wa8730a015g003250, Wa8730a020g000110
GO:0004866	endopeptidase inhibitor activity	3/241	6/13944	9.81322e-05	5	3	0.0480096	Wa8730a001g001150, Wa8730a010g004440, Wa8730a010g004450
GO:0140110	transcription regulator activity	24/241	580/13944	0.0001015	1	24	0.0480096	Wa8730a001g004430, Wa8730a001g005110, Wa8730a001g007370, Wa8730a003g001270, Wa8730a003g001330, Wa8730a004g000410, Wa8730a004g005870, Wa8730a004g008480, Wa8730a006g000510, Wa8730a007g000440, Wa8730a010g001140, Wa8730a011g003790, Wa8730a012g004840, Wa8730a014g000450, Wa8730a014g005560, Wa8730a015g000740, Wa8730a015g002550, Wa8730a018g000340, Wa8730a018g001290, Wa8730a018g002050, Wa8730a019g000660, …
