# Supplementary material for: Streamlined spatial and environmental expression signatures characterize the minimalist duckweedWolffia australiana
Source: HighWire-hosted journal article supplement (doi:10.1101/gr.279091.124), 2024-07-01
Supplement: Supplemental_Dataset_S4.xlsx [file Supplemental_Dataset_S4.xlsx]

## Sheet: Dusk C0 DEGs
Dataset S4. Differentially Expressed Genes for Dusk Cluster 0
Genes showing significant differential expression (log2FC>1 & p_val_adj <0.05 & PCT1 > 10%) in the given cluster versus all other cells in the dataset
PCT1: Percentage of cells within the cluster expressing the gene
PCT2: Percentage of cells outside the cluster expressing the gene
Gene	Ave. Log2 FC	p Value	p Value Adj.	PCT1	PCT2	Arabidopsis orthologues	Arabidopsis gene names	Arabidopsis gene description
Wa8730a003g005480	3.5489	4.04265e-263	5.63627e-259	0.959	0.516
Wa8730a008g000620	3.22661	1.99543e-274	2.78202e-270	0.975	0.395
Wa8730a008g001000	3.19003	2.83715e-301	3.95555e-297	0.886	0.192
Wa8730a014g002170	2.90542	0	0	0.867	0.137
Wa8730a008g001340	2.89377	1.76183e-156	2.45634e-152	0.737	0.258
Wa8730a015g000910	2.59499	2.00298e-161	2.79256e-157	0.53	0.087	AT4G31500 AT5G07990	ATR4, CYP83B1, RED1, RNT1, SUR2 CYP75B1, D501, TT7	Encodes an oxime-metabolizing enzyme in the biosynthetic pathway of glucosinolates. Is required for phytochrome signal transduction in red light. Mutation confers auxin overproduction. Required for flavonoid 3' hydroxylase activity.
Wa8730a009g003530	2.50557	1.26008e-224	1.7568e-220	0.998	0.947	AT2G38530	LP2, LTP2, cdf3	Involved in lipid transfer between membranes. Belongs to a family of Lipid transfer proteins. Sequence similarity to other plant/Arabidopsis LPT genes but highest similarity to LPT1. Stress and pathogen-inducible motifs found in the upstream region. Expressed in flower, leaves and siliques but absent in roots. Predicted to be a member of PR-14 pathogenesis-related protein family with the followin…
Wa8730a012g004900	2.47146	1.06498e-273	1.48479e-269	0.744	0.098	AT5G10180 AT1G78000 AT4G08620 AT1G22150	AST68, SULTR2 1 SEL1, SULTR1 2 SULTR1 1 SULTR1 3	Encodes a low-affinity sulfate transporter expressed in the root cap and central cylinder, where it is induced by sulfur starvation. Expression in the shoot vascular system is not induced by sulfur starvation. Encodes a sulfate transporter that can restore sulfate uptake capacity of a yeast mutant lacking sulfate transporter genes. Encodes a sulfate transporter. Contains STAS domain. Expressed in…
Wa8730a001g000280	2.42706	3.87562e-267	5.40339e-263	0.764	0.119	AT3G12500 AT4G01700 AT1G02360	ATHCHIB, B-CHI, CHI-B, HCHIB, PR-3, PR3	encodes a basic chitinase involved in ethylene/jasmonic acid mediated signalling pathway during systemic acquired resistance based on expression analyses. Chitinase family protein Chitinase family protein
Wa8730a001g007090	2.38933	2.27358e-114	3.16983e-110	0.456	0.096	AT2G41480 AT5G05340	AtPRX25, PRX25 PRX52	Encodes a cationic cell-wall-bound peroxidase homolog that is involved in the lignification of cell walls. Encodes a protein with sequence similarity to peroxidases that is involved in lignin biosynthesis. Loss of function mutations show abnormal development of xylem fibers and reduced levels of lignin biosynthetic enxymes.
Wa8730a014g002180	2.32153	3.02329e-256	4.21507e-252	0.722	0.098
Wa8730a006g002120	2.30476	2.66116e-226	3.71018e-222	0.975	0.705	AT5G50200 AT4G24715	ATNRT3.1, NRT3.1, WR3 NA	Wound-responsive gene 3 (WR3). Encodes a high-affinity nitrate transporter. Up-regulated by nitrate. Involved in jasmonic acid-independent wound signal transduction. NA
Wa8730a002g001530	2.24061	1.20949e-216	1.68627e-212	0.875	0.287	AT4G24130		Protein of unknown function, DUF538
Wa8730a003g005380	2.15553	2.43502e-138	3.39491e-134	0.56	0.127	AT3G46860 AT5G43570		Predicted to encode a PR (pathogenesis-related) peptide that belongs to the PR-6 proteinase inhibitor family. Six putative PR-6-type protein encoding genes are found in Arabidopsis: At2g38900, At2g38870, At5g43570, At5g43580, At3g50020 and At3g46860. Predicted to encode a PR (pathogenesis-related) peptide that belongs to the PR-6 proteinase inhibitor family. Six putative PR-6-type protein encodin…
Wa8730a001g011180	2.01348	1.37829e-186	1.92161e-182	0.723	0.188	AT5G02540 AT2G37540 AT4G11410		NAD(P)-binding Rossmann-fold superfamily protein NAD(P)-binding Rossmann-fold superfamily protein NAD(P)-binding Rossmann-fold superfamily protein
Wa8730a003g000980	2.01203	5.58855e-185	7.79156e-181	0.84	0.3	AT2G22860 AT3G49780 AT4G37720	ATPSK2, PSK2 ATPSK3, ATPSK4, PSK4 ATPSK6, PSK6	Phytosulfokine 2 precursor, coding for a unique plant peptide growth factor. Phytosulfokine 3 precursor, coding for a unique plant peptide growth factor. Plants overexpressing this gene (under a 35S promoter), develop normal cotyledons and hypocotyls but their growth, in particular that of their roots, was faster than that of wildtype. Probable phytosulfokines 6 precursor, coding for a unique pla…
Wa8730a016g003520	1.89087	1.74899e-170	2.43845e-166	0.929	0.672	AT5G37600 AT3G17820 AT5G35630 AT1G66200 AT5G16570 AT1G48470	ATGLN1 1, ATGSR1, GLN1 1, GSR ATGSKB6, GLN1.3, GLN1 3 ATGSL1, GLN2, GS2 ATGSR2, GLN1 2, GSR2 GLN1 4 GLN1 5	encodes a cytosolic glutamine synthetase, the enzyme has high affinity with substrate ammonium encodes a cytosolic glutamine synthetase, the enzyme has low affinity with substrate ammonium chloroplastic glutamine synthetase encodes a cytosolic glutamate synthetase, this enzyme has low affinity with substrate ammonium Encodes a cytosolic glutamine synthetase, the enzyme has high affinity with subs…
Wa8730a014g002160	1.82217	8.44769e-178	1.17778e-173	0.538	0.072
Wa8730a004g001070	1.79263	5.59341e-138	7.79834e-134	0.839	0.433	AT5G60770 AT1G12940	ATNRT2.4, NRT2.4 ATNRT2.5, NRT2.5	member of High affinity nitrate transporter family member of High affinity nitrate transporter family
Wa8730a009g003220	1.74144	8.31961e-145	1.15992e-140	0.484	0.075
Wa8730a007g008670	1.72699	2.21817e-114	3.09257e-110	0.758	0.348	AT3G29260 AT4G03140		NAD(P)-binding Rossmann-fold superfamily protein NAD(P)-binding Rossmann-fold superfamily protein
Wa8730a007g005010	1.72	1.7647e-145	2.46035e-141	0.726	0.247	AT1G09400		FMN-linked oxidoreductases superfamily protein
Wa8730a020g002990	1.71702	3.08159e-202	4.29635e-198	0.986	0.834	AT1G13440 AT3G04120 AT1G79530 AT1G16300	GAPC-2, GAPC2 GAPC, GAPC-1, GAPC1 GAPCP-1 GAPCP-2	The expression level of GAPC-2 is upregulated in Arabidopsis seedlings exposed to cadmium. encodes cytosolic GADPH (C subunit) involved in the glycolytic pathway but also interacts with H2O2 potentially placing it in a signalling cascade induced by ROS. Encodes one of the chloroplast/plastid localized GAPDH isoforms (GAPCp1/At1g79530 and GAPCp2/At1g16300). gapcp double mutants display a drastic p…
Wa8730a020g000810	1.65958	2.11094e-98	2.94308e-94	0.373	0.066	AT3G52720 AT2G28210 AT5G04180 AT1G08080	ACA1, ATACA1, CAH1 ACA2, ATACA2 ACA3, ATACA3 ACA7, ATACA7	Encodes a putative alpha carbonic anhydrase (CAH1) located in the chloroplast stroma. Most chloroplast proteins are encoded by the nuclear genome and imported with the help of sorting signals that are intrinsic parts of the polypeptides. CAH1 takes an alternative route through the secretory pathway, and becomes N-glycosylated before entering the chloroplast. alpha carbonic anhydrase 2 alpha carbo…
Wa8730a016g002860	1.63853	3.89989e-144	5.43722e-140	0.824	0.327	AT1G68610 AT3G18470 AT1G49030	PCR11	Target promoter of the male germline-specific transcription factor DUO1. PLAC8 family protein PLAC8 family protein
Wa8730a013g004170	1.6274	1.08363e-112	1.5108e-108	0.538	0.144	AT1G17860		Kunitz family trypsin and protease inhibitor protein
Wa8730a003g001030	1.62262	7.95479e-99	1.10906e-94	0.775	0.431	AT2G16060	AHB1, ARATH, ATGLB1, GLB1, HB1, NSHB1	Encodes a class 1 nonsymbiotic hemoglobin induced by low oxygen levels with very high oxygen affinity. It is not likely to be a hemoglobin transporter because of its extremely high affinity for oxygen.
Wa8730a009g003160	1.60218	2.11682e-149	2.95127e-145	0.568	0.111
Wa8730a005g001430	1.59285	1.60322e-163	2.23521e-159	0.527	0.077	AT1G13140 AT4G39490 AT5G02900 AT4G32170 AT5G52320 AT2G21910 AT1G47620	CYP86C3 CYP96A10 CYP96A13 CYP96A2 CYP96A4 CYP96A5 CYP96A8	member of CYP86C member of CYP96A member of CYP96A member of CYP96A member of CYP96A member of CYP96A member of CYP96A
Wa8730a001g006060	1.5147	6.53851e-107	9.11599e-103	0.601	0.2	AT3G10960	ATAZG1, AZG1	Encodes a homolog of the adenine-guanine-hypoxanthine transporter AzgA of Aspergillus nidulans. Function as a plant adenine-guanine transporter. Two closely related genes exist in Arabidopsis: AT3G10960 (Azg1) and AT5G50300 (Azg2).
Wa8730a016g001330	1.51248	3.74002e-116	5.21434e-112	0.696	0.254	AT1G22250 AT4G08910 AT1G78170
Wa8730a004g003310	1.48313	1.98766e-139	2.7712e-135	0.47	0.074
Wa8730a018g002950	1.48271	1.20549e-93	1.68069e-89	0.717	0.366
Wa8730a013g001900	1.41801	3.47576e-97	4.84591e-93	0.411	0.082	AT4G12310 AT2G45570 AT2G46660 AT1G01190	CYP706A5 CYP76C2 CYP78A6, EOD3 CYP78A8	member of CYP706A member of CYP76C member of CYP78A member of CYP78A
Wa8730a006g004140	1.41351	3.29298e-97	4.59107e-93	0.307	0.039	AT2G41480 AT5G64120 AT5G66390 AT1G05260 AT2G22420 AT2G34060 AT3G21770 AT5G15180 AT5G39580 AT1G49570 AT1G14550	AtPRX25, PRX25 AtPRX71, PRX71 PRX72 RCI3, RCI3A	Encodes a cationic cell-wall-bound peroxidase homolog that is involved in the lignification of cell walls. encodes a cell wall bound peroxidase that is induced by hypo-osmolarity Encodes a peroxidase that is involved in lignin biosynthesis. Encodes a cold-inducible cationic peroxidase that is involved in the stress response. In response to low temperature, RCI3 transcripts accumulate in the aeria…
Wa8730a013g004680	1.40922	5.2299e-138	7.29153e-134	0.441	0.062	AT5G43360 AT2G32830 AT3G54700	ATPT4, PHT1 3, PHT3 PHT1 5, PHT5 PHT1 7	Encodes Pht1 3, a member of the Pht1 family of phosphate transporters which include: Pht1 1/At5g43350, Pht1 2/At5g43370, Pht1 3/At5g43360, Pht1 4/At2g38940, Pht1 5/At2g32830, Pht1 6/At5g43340, Pht1 7/At3g54700, Pht1 8/At1g20860, Pht1 9/At1g76430 (Plant Journal 2002, 31:341). Encodes Pht1 5, a member of the Pht1 family of phosphate transporters which include: Pht1 1/At5g43350, Pht1 2/At5g43370, Ph…
Wa8730a006g004370	1.40321	6.62814e-106	9.24096e-102	0.449	0.093	AT2G41480 AT5G64120 AT5G66390 AT1G05260 AT2G34060 AT3G21770 AT5G15180 AT5G39580 AT3G03670 AT1G49570	AtPRX25, PRX25 AtPRX71, PRX71 PRX72 RCI3, RCI3A	Encodes a cationic cell-wall-bound peroxidase homolog that is involved in the lignification of cell walls. encodes a cell wall bound peroxidase that is induced by hypo-osmolarity Encodes a peroxidase that is involved in lignin biosynthesis. Encodes a cold-inducible cationic peroxidase that is involved in the stress response. In response to low temperature, RCI3 transcripts accumulate in the aeria…
Wa8730a017g002540	1.36325	9.70176e-111	1.35262e-106	0.777	0.358	AT2G45960 AT3G61430 AT1G01620 AT4G00430 AT4G23400 AT2G37170 AT2G39010 AT4G35100 AT2G16850	ATHH2, PIP1 2, PIP1B, TMP-A ATPIP1, PIP1, PIP1 1, PIP1A PIP1 3, PIP1C, TMP-B PIP1 4, PIP1E, TMP-C PIP1 5, PIP1D PIP2 2, PIP2B PIP2 6, PIP2E PIP2 7, PIP3, PIP3A, SIMIP PIP2 8, PIP3B	a member of the plasma membrane intrinsic protein subfamily PIP1. localizes to the plasma membrane and exhibits water transport activity in Xenopus oocyte. expressed ubiquitously and protein level decreases slightly during leaf development. a member of the plasma membrane intrinsic protein subfamily PIP1. localizes to the plasma membrane and exhibits water transport activity in Xenopus oocyte. ex…
Wa8730a020g002340	1.36038	6.66953e-86	9.29866e-82	0.778	0.525	AT1G22840	ATCYTC-A, CYTC-1	Encodes cytochrome c. Contains two site II (TGGGCC/T) elements, which interact with a TCP-domain transcription factor, and a downstream internal telomeric repeat, and are required for expression of the Cytc-1 gene. Promoter directs preferential expression in root and shoot meristems and in anthers.
Wa8730a012g000820	1.33924	8.17596e-94	1.13989e-89	0.78	0.493	AT1G71950		SPI-1 is a member of the I9 inhibitor family. It is an inhibitor of SBT4.13 subtilase.
Wa8730a003g008790	1.31767	8.07877e-88	1.12634e-83	0.541	0.185	AT5G06440 AT3G11720		Polyketide cyclase/dehydrase and lipid transport superfamily protein
Wa8730a013g005830	1.30046	2.32306e-120	3.23881e-116	0.884	0.674	AT1G04410	c-NAD-MDH1	predicted to encode a cytosolic malate dehydrogenase.
Wa8730a008g003840	1.28751	5.46391e-92	7.61778e-88	0.345	0.059	AT4G19690 AT3G12750 AT2G30080 AT1G31260 AT2G32270 AT1G05300 AT2G04032	ATIRT1, IRT1 AtZIP1, ZIP1 ATZIP6, ZIP6 ZIP10 ZIP3 ZIP5 ZIP7	Fe(II) transport protein (IRT1) A member of Zrt- and Irt-related protein (ZIP) family. transcript is induced in response to zinc deficiency in the root. member of Fe(II) transporter isolog family. Gene expression is not regulated by iron, copper, or zinc deficiency or excess. member of Fe(II) transporter isolog family A member of Zrt- and Irt-related protein (ZIP) family. transcript is induced in…
Wa8730a016g002960	1.27863	4.34293e-121	6.05492e-117	0.897	0.703	AT1G22300 AT5G10450 AT1G78300 AT4G09000 AT1G26480 AT5G16050 AT3G02520	14-3-3EPSILON, GF14, GRF10 14-3-3lambda, AFT1, GRF6 14-3-3OMEGA, GF14, GRF2 GF14, GRF1 GF14, GRF12 GF14, GRF5 GF14, GRF7	Encodes a 14-3-3 protein. This protein is reported to interact with the BZR1 transcription factor involved in brassinosteroid signaling and may affect the nucleocytoplasmic shuttling of BZR1 Encodes a member of the 14-3-3 gene family that is a lambda isoform (14-3-3&#955 ). Interacts with APX3 (ascorbate peroxidase) and AKR2 , suggesting a role in mediating oxidative metabolism in stress response…
Wa8730a005g002760	1.2474	2.39281e-84	3.33605e-80	0.513	0.171	AT4G29220 AT4G26270 AT4G32840 AT5G56630	PFK1 PFK3 PFK6 PFK7	phosphofructokinase 1 phosphofructokinase 3 phosphofructokinase 6 phosphofructokinase 7
Wa8730a020g000340	1.24606	7.01457e-92	9.77971e-88	0.913	0.658
Wa8730a009g004260	1.24546	1.25237e-64	1.74605e-60	0.733	0.49	AT1G02335 AT3G62020 AT1G09560 AT3G05930 AT3G04200	GL22, PDGLP2 GLP10 GLP5, PDGLP1 GLP8	Encodes a plasodesmata-located protein involved in regulating primary root growth by controlling phloem-mediated allocation of resources between the primary and lateral root meristems. germin-like protein (GLP10) germin-like protein (GLP5) germin-like protein (GLP8) RmlC-like cupins superfamily protein
Wa8730a020g001670	1.23675	1.10086e-64	1.53482e-60	0.655	0.368	AT5G63400 AT4G25280 AT5G50370	ADK1	encodes a protein similar to adenylate kinase. P-loop containing nucleoside triphosphate hydrolases superfamily protein Adenylate kinase family protein
Wa8730a017g000040	1.23237	2.56575e-86	3.57717e-82	0.755	0.362
Wa8730a010g000090	1.22591	2.91403e-76	4.06274e-72	0.837	0.622
Wa8730a007g001470	1.22552	3.62062e-97	5.04787e-93	0.84	0.643	AT4G25130	MSRA4, PMSR4	Encodes a chloroplast-localized methionine sulfoxide reductase that is a member of the MSRA family. Involved in protection of chloroplasts from oxidative stress.
Wa8730a009g004310	1.22454	2.16038e-104	3.012e-100	0.375	0.062	AT1G02335 AT3G62020 AT1G09560 AT3G05930 AT3G04200	GL22, PDGLP2 GLP10 GLP5, PDGLP1 GLP8	Encodes a plasodesmata-located protein involved in regulating primary root growth by controlling phloem-mediated allocation of resources between the primary and lateral root meristems. germin-like protein (GLP10) germin-like protein (GLP5) germin-like protein (GLP8) RmlC-like cupins superfamily protein
Wa8730a006g001340	1.19994	5.36893e-72	7.48536e-68	0.769	0.56	AT1G79550	PGK	Encodes cytosolic phosphoglycerate kinase (PGK).
Wa8730a009g003140	1.19001	2.95259e-87	4.1165e-83	0.443	0.113
Wa8730a014g002860	1.18665	3.11956e-87	4.34929e-83	0.459	0.124	AT2G45190 AT1G08465 AT2G26580	AFO, FIL, YAB1 YAB2 YAB5	Encodes a member of the YABBY family of transcriptional regulators that is involved in abaxial cell type specification in leaves and fruits. YAB1 acts in a non-cell autonomous fashion within the meristem to affect phyllotactic patterning. The non-autonomous effect on the central region of the meristem is mediated through the activity if Lateral Suppressor (LAS). Member of the YABBY family of Arab…
Wa8730a001g007430	1.17244	1.4435e-91	2.01253e-87	0.528	0.162	AT4G25850 AT5G57240	ORP4B ORP4C	OSBP(oxysterol binding protein)-related protein 4B OSBP(oxysterol binding protein)-related protein 4C
Wa8730a007g002110	1.16473	3.7604e-09	5.24275e-05	0.166	0.088
Wa8730a003g000340	1.16239	8.58316e-66	1.19666e-61	0.663	0.335	AT3G19450 AT4G34230 AT4G37970	ATCAD4, CAD, CAD-C, CAD4 ATCAD5, CAD-5, CAD5 ATCAD6, CAD6	Encodes a catalytically active cinnamyl alcohol dehydrogenase which uses p-coumaryl aldehyde as a preferred substrate. It can also use caffeyl, coniferyl and d-hydroxyconiferyl aldehydes as substrates. Encodes a catalytically active cinnamyl alcohol dehydrogenase which uses p-coumaryl aldehyde as a preferred substrate. It can also use sinapyl, caffeyl, coniferyl and d-hydroxyconiferyl aldehydes a…
Wa8730a009g000440	1.1623	2.15367e-109	3.00265e-105	0.9	0.728	AT3G55440	ATCTIMC, CYTOTPI, TPI	Encodes triosephosphate isomerase.
Wa8730a019g003170	1.12889	5.01474e-107	6.99155e-103	0.902	0.674	AT3G10300 AT5G04170		Calcium-binding EF-hand family protein Calcium-binding EF-hand family protein
Wa8730a012g005020	1.10995	6.4442e-72	8.98451e-68	0.269	0.043	AT1G14290	SBH2	Encodes one of the two redundant sphingoid base hydroxylases (SBH). Involved in sphingolipid trihydroxy long-chain base (4-hydroxysphinganine) biosynthesis. Double mutants of SBHs were dwarfed and not able to progress from vegetative to reproductive growth.
Wa8730a010g000690	1.10331	2.27347e-87	3.16968e-83	0.326	0.054	AT4G31800 AT4G22070	ATWRKY18, WRKY18 ATWRKY31, WRKY31	Pathogen-induced transcription factor. Binds W-box sequences in vitro. Forms protein complexes with itself and with WRKY40 and WRKY60. Constitutive expression of WRKY18 enhanced resistance to P. syringae, but its coexpression with WRKY40 or WRKY60 made plants more susceptible to both P. syringae and B. cinerea. WRKY18, WRKY40, and WRKY60 have partially redundant roles in response to the hemibiotr…
Wa8730a001g007510	1.1024	1.30328e-90	1.81703e-86	0.867	0.692	AT1G51650		ATP synthase epsilon chain, mitochondrial
Wa8730a004g006810	1.10085	9.0749e-73	1.26522e-68	0.714	0.361	AT5G44130	FLA13	FASCICLIN-like arabinogalactan protein 13 precursor
Wa8730a001g006600	1.10064	7.51674e-61	1.04798e-56	0.641	0.363
Wa8730a005g006790	1.09429	4.09753e-116	5.71278e-112	0.951	0.84	AT5G63030 AT5G40370	GRXC1 GRXC2	Thioredoxin superfamily protein Glutaredoxin family protein
Wa8730a007g007580	1.08495	9.25686e-48	1.29059e-43	0.513	0.263
Wa8730a013g001590	1.08474	3.47853e-49	4.84977e-45	0.634	0.397
Wa8730a015g000680	1.08122	1.20568e-55	1.68095e-51	0.706	0.497
Wa8730a001g011970	1.06166	1.72001e-64	2.39804e-60	0.68	0.391	AT3G53990		Encodes universal stress protein (USP). Functions as a molecular chaperone under heat shock and oxidative stress conditions. Chaperone activity and assembly into complexes is redox regulated.
Wa8730a016g000670	1.05639	1.72424e-101	2.40394e-97	0.892	0.76
Wa8730a004g002520	1.04857	7.12289e-67	9.93073e-63	0.752	0.503	AT2G31490
Wa8730a003g004980	1.04251	9.79447e-86	1.36555e-81	0.291	0.04	AT3G51590	LTP12	Encodes a member of the lipid transfer protein family. Proteins of this family are generally small (~9 kD), basic, expressed abundantly and contain eight Cys residues. The proteins can bind fatty acids and acylCoA esters and can transfer several different phospholipids. They are localized to the cell wall. The LTP12 promoter is active exclusively in the tapetum during the uninucleate microspore a…
Wa8730a006g003200	1.03579	1.50533e-85	2.09873e-81	0.34	0.062
Wa8730a014g001670	1.03472	8.90725e-111	1.24185e-106	0.329	0.039
Wa8730a005g006310	1.0294	1.60066e-54	2.23164e-50	0.693	0.474
Wa8730a013g005630	1.02766	1.07928e-44	1.50473e-40	0.608	0.378	AT2G33470	ATGLTP1, GLTP1	glycolipid transfer protein 1
Wa8730a007g000220	1.0149	9.49939e-47	1.3244e-42	0.665	0.449
Wa8730a008g005720	1.01363	5.65557e-46	7.885e-42	0.348	0.126
Wa8730a015g002300	1.00689	9.03468e-64	1.25962e-59	0.687	0.386	AT5G13500 AT5G25265 AT2G25260
Wa8730a005g008580	1.00317	3.32453e-43	4.63506e-39	0.519	0.288

## Sheet: Dusk C1 DEGs
Dataset S4. Differentially Expressed Genes for Dusk Cluster 1
Genes showing significant differential expression (log2FC>1 & p_val_adj <0.05 & PCT1 > 10%) in the given cluster versus all other cells in the dataset
PCT1: Percentage of cells within the cluster expressing the gene
PCT2: Percentage of cells outside the cluster expressing the gene
Gene	Ave. Log2 FC	p Value	p Value Adj.	PCT1	PCT2	Arabidopsis orthologues	Arabidopsis gene names	Arabidopsis gene description
Wa8730a008g000530	2.49803	9.42696e-190	1.31431e-185	0.835	0.203
Wa8730a009g001610	2.28959	4.59309e-119	6.40368e-115	0.725	0.234	AT5G59320	LTP3	Predicted to encode a PR (pathogenesis-related) protein. Belongs to the lipid transfer protein (PR-14) family with the following members: At2g38540/LTP1, At2g38530/LTP2, At5g59320/LTP3, At5g59310/LTP4, At3g51600/LTP5, At3g08770/LTP6, At2g15050/LTP7, At2g18370/LTP8, At2g15325/LTP9, At5g01870/LTP10, At4g33355/LTP11, At3g51590/LTP12, At5g44265/LTP13, At5g62065/LTP14, At4g08530/LTP15.
Wa8730a001g001120	2.14226	3.04472e-140	4.24496e-136	0.754	0.213
Wa8730a008g000170	2.09426	2.55793e-51	3.56626e-47	0.33	0.091
Wa8730a008g000510	2.06526	1.66879e-50	2.32663e-46	0.424	0.154
Wa8730a008g003960	1.70529	1.6308e-83	2.27367e-79	0.905	0.663
Wa8730a004g007430	1.66201	6.18988e-117	8.62993e-113	0.925	0.602
Wa8730a001g007340	1.64086	2.85866e-102	3.98555e-98	0.725	0.246	AT2G18800 AT2G06850 AT4G30270 AT4G14130 AT4G25810 AT5G57550	ATXTH21, XTH21 EXGT-A1, EXT, XTH4 MERI-5, MERI5B, SEN4, XTH24 XTH15, XTR7 XTH23, XTR6 XTH25, XTR3	xyloglucan endotransglucosylase/hydrolase 21 endoxyloglucan transferase (EXGT-A1) gene encodes a protein similar to endo xyloglucan transferase in sequence. It is also very similar to BRU1 in soybean, which is involved in brassinosteroid response. xyloglucan endotransglycosylase-related protein (XTR7) xyloglucan endotransglycosylase-related protein (XTR6) xyloglucan endotransglycosylase-related p…
Wa8730a015g005520	1.63657	1.11904e-84	1.56017e-80	0.582	0.174
Wa8730a002g009150	1.55988	1.01703e-72	1.41795e-68	0.448	0.118	AT1G65060 AT4G19010	4CL3	encodes an isoform of 4-coumarate:CoA ligase (4CL), which is involved in the last step of the general phenylpropanoid pathway. mRNA levels are not induced in response to wounding or to fungal infection by P. parasitica. mRNA is expressed in flowers, to a lesser degree in mature leaves and siliques and marginally in seedling roots and bolting stems of mature plants. The catalytic efficiency was in…
Wa8730a020g002750	1.52621	6.66321e-72	9.28985e-68	0.519	0.158	AT1G67730 AT1G24470	ATKCR1, KCR1, YBR159 ATKCR2, KCR2	Encodes one of the two Arabidopsis homologues to YBR159w encoding a S. cerevisiae beta-ketoacyl reductase (KCR), which catalyzes the first reduction during VLCFA (very long chain fatty acids, >18 carbon) elongation: KCR1 (At1g67730), KCR2 (At1g24470). Complementation of the yeast ybr159Delta mutant demonstrated that the two KCR proteins are divergent and that only AtKCR1 can restore heterologous …
Wa8730a004g002220	1.5191	6.03133e-42	8.40888e-38	0.273	0.073	AT5G55620 AT5G41761
Wa8730a013g001880	1.50967	6.20422e-69	8.64992e-65	0.468	0.135	AT1G07240	UGT71C5	Encodes a UDP-glucosyltransferase that plays a role in abscisic acid (ABA) glucosylation from ABA to ABA-glucose ester and regulates ABA homeostasis, thereby influencing the ABA signal network.
Wa8730a001g004950	1.47896	7.77712e-81	1.08429e-76	0.725	0.326
Wa8730a006g005060	1.47893	3.97825e-82	5.54648e-78	0.664	0.237	AT5G15290 AT1G14160	CASP5	Uncharacterised protein family (UPF0497) Uncharacterised protein family (UPF0497)
Wa8730a008g000650	1.47456	1.2932e-104	1.80298e-100	0.965	0.654
Wa8730a019g001620	1.43935	7.99854e-57	1.11516e-52	0.475	0.167	AT3G66658 AT1G44170	ALDH22A1 ALDH3H1, ALDH4	Encodes a putative aldehyde dehydrogenase. The gene is not responsive to osmotic stress and is expressed constitutively at a low level in plantlets and root cultures. Encodes a protein similar to the aldehyde dehydrogenase cp-ADH from C.plantagineum. Constitutively expressed at low levels.
Wa8730a001g011170	1.43598	1.86154e-66	2.59536e-62	0.675	0.326	AT5G02540 AT2G37540 AT4G11410		NAD(P)-binding Rossmann-fold superfamily protein NAD(P)-binding Rossmann-fold superfamily protein NAD(P)-binding Rossmann-fold superfamily protein
Wa8730a011g004850	1.42452	5.36128e-48	7.47469e-44	0.413	0.151
Wa8730a012g003470	1.41657	1.9815e-46	2.76261e-42	0.554	0.27	AT1G53830 AT3G14310 AT4G33220 AT5G49180 AT5G20860 AT3G43270	ATPME2, PME2 ATPME3, OZS2, PME3 ATPME44, PME44	encodes a pectin methylesterase encodes a pectin methylesterase, targeted by a cellulose binding protein (CBP) from the parasitic nematode Heterodera schachtii during parasitism. pectin methylesterase 44 Encodes a putative pectin methylesterase. The gene is preferentially expressed in floral buds. Plant invertase/pectin methylesterase inhibitor superfamily Plant invertase/pectin methylesterase in…
Wa8730a009g005630	1.41352	2.68735e-80	3.7467e-76	0.875	0.695
Wa8730a009g001730	1.4083	3.00174e-66	4.18503e-62	0.664	0.306	AT2G41290 AT1G08470 AT3G57030 AT3G51440	SSL2 SSL3	Although this enzyme is predicted to encode a strictosidine synthase (SS), it lacks a conserved catalytic glutamate residue found in active SS enzymes and it is not expected to have SS activity. Although this enzyme is predicted to encode a strictosidine synthase (SS), it lacks a conserved catalytic glutamate residue found in active SS enzymes and it is not expected to have SS activity. Calcium-d…
Wa8730a008g000640	1.39214	4.23212e-52	5.90042e-48	0.369	0.114
Wa8730a015g005080	1.39166	3.21328e-67	4.47995e-63	0.538	0.176
Wa8730a017g001990	1.39131	2.39184e-58	3.3347e-54	0.653	0.343
Wa8730a010g004880	1.37402	3.2233e-47	4.49392e-43	0.633	0.387	AT5G55850 AT5G63270 AT5G40645	NOI	NOI protein RPM1-interacting protein 4 (RIN4) family protein RPM1-interacting protein 4 (RIN4) family protein
Wa8730a012g001710	1.32358	5.25065e-34	7.32046e-30	0.319	0.12	AT5G63790	ANAC102, NAC102	Encodes a member of the NAC family of transcription factors. ANAC102 appears to have a role in mediating response to low oxygen stress (hypoxia) in germinating seedlings.
Wa8730a017g002740	1.31448	9.65081e-43	1.34552e-38	0.523	0.26	AT2G16530 AT1G72590		Encodes polyprenol reductase involved in N-gylcosylation. Mutants are defective in pollen development. Knockouts are embryo lethal Encodes a polyphenol reductase.
Wa8730a001g011890	1.30051	4.45733e-59	6.2144e-55	0.771	0.501	AT5G59530 AT2G44800 AT5G43450		2-oxoglutarate (2OG) and Fe(II)-dependent oxygenase superfamily protein 2-oxoglutarate (2OG) and Fe(II)-dependent oxygenase superfamily protein encodes a protein whose sequence is similar to ACC oxidase
Wa8730a010g004870	1.2887	3.73047e-29	5.20103e-25	0.473	0.271	AT5G48230	AACT2, ACAT2, EMB1276	Encodes an acetoacetyl-CoA thiolase that generates the bulk of the acetoacetyl-CoA precursor needed for the cytosolic localized, mevalonate-derived isoprenoids biosynthetic pathway. Loss-of-function mutants are embryo lethal.
Wa8730a009g002200	1.23087	3.7443e-38	5.2203e-34	0.38	0.149	AT3G05020 AT5G27200	ACP, ACP1 ACP5	encodes an acyl carrier protein expressed in leaves, roots, and dry seeds. Protein is not regulated by light. encodes an acyl carrier protein
Wa8730a015g003690	1.22766	6.62233e-37	9.23286e-33	0.387	0.154	AT3G07680	p24beta2	Encodes an Golgi-localized p24 protein. Interacts with p24delta5 at ER export sites for ER exit and coupled transport to the Golgi apparatus. The mRNA is cell-to-cell mobile.
Wa8730a006g002600	1.17687	3.96561e-38	5.52886e-34	0.341	0.115	AT1G79460	ATKS, ATKS1, GA2, KS, KS1	Encodes for a protein with ent-kaurene synthase B activity which catalyzes the second step in the cyclization of GGPP to ent-kaurene in the gibberellins biosynthetic pathway.
Wa8730a007g006900	1.16684	2.03056e-29	2.831e-25	0.514	0.32	AT4G34240 AT1G44170	ALDH3, ALDH3I1 ALDH3H1, ALDH4	Aldehyde dehydrogenase induced by ABA and dehydration Encodes a protein similar to the aldehyde dehydrogenase cp-ADH from C.plantagineum. Constitutively expressed at low levels.
Wa8730a003g005060	1.16157	8.15886e-43	1.13751e-38	0.358	0.114	AT1G68530 AT1G25450 AT2G26640 AT4G34510 AT5G43760 AT1G19440	CER6, CUT1, G2, KCS6, POP1 CER60, KCS5 KCS11 KCS17 KCS20 KCS4	Encodes KCS6, a member of the 3-ketoacyl-CoA synthase family involved in the biosynthesis of VLCFA (very long chain fatty acids). Encodes KCS5, a member of the 3-ketoacyl-CoA synthase family involved in the biosynthesis of VLCFA (very long chain fatty acids). Encodes KCS11, a member of the 3-ketoacyl-CoA synthase family involved in the biosynthesis of VLCFA (very long chain fatty acids). Encodes …
Wa8730a018g000750	1.15261	1.51701e-45	2.11502e-41	0.411	0.144	AT3G55120	A11, AtCHI, CFI, CHI, TT5	Catalyzes the conversion of chalcones into flavanones. Required for the accumulation of purple anthocyanins in leaves and stems.
Wa8730a015g004500	1.13811	1.7956e-20	2.50342e-16	0.418	0.265	AT1G60010 AT1G10530
Wa8730a014g005820	1.13132	2.33456e-42	3.25484e-38	0.501	0.217	AT3G10280 AT4G34510 AT1G04220 AT5G43760 AT1G19440 AT2G16280	KCS14 KCS17 KCS2 KCS20 KCS4 KCS9	Encodes KCS14, a member of the 3-ketoacyl-CoA synthase family involved in the biosynthesis of VLCFA (very long chain fatty acids). Encodes KCS17, a member of the 3-ketoacyl-CoA synthase family involved in the biosynthesis of VLCFA (very long chain fatty acids). Encodes KCS2, a member of the 3-ketoacyl-CoA synthase family involved in the biosynthesis of VLCFA (very long chain fatty acids). Encodes…
Wa8730a005g003480	1.12888	6.71135e-38	9.35696e-34	0.389	0.152	AT5G25610	ATRD22, RD22	responsive to dehydration 22 (RD22) mediated by ABA
Wa8730a019g002640	1.12725	4.68688e-19	6.53445e-15	0.404	0.256	AT5G19140	AILP1, ATAILP1	Aluminium induced protein with YGL and LRDR motifs
Wa8730a009g002590	1.12085	6.57802e-34	9.17108e-30	0.666	0.49	AT3G16770 AT2G47520 AT3G23220 AT1G53910	ATEBP, EBP, ERF72, RAP2.3 AtERF71, ERF71, HRE2 ESE1 RAP2.12	Encodes a member of the ERF (ethylene response factor) subfamily B-2 of the plant specific ERF/AP2 transcription factor family (RAP2.3). The protein contains one AP2 domain. There are 5 members in this subfamily including RAP2.2 AND RAP2.12.It is localized to the nucleus and acts as a transcriptional activator through the GCC-box. It has been identified as a suppressor of Bax-induced cell death b…
Wa8730a005g008830	1.11717	7.8909e-53	1.10015e-48	0.719	0.417	AT1G30020		Protein of unknown function, DUF538
Wa8730a016g001400	1.10837	1.19818e-36	1.6705e-32	0.554	0.306
Wa8730a001g010900	1.09967	8.53707e-22	1.19024e-17	0.382	0.21	AT5G16710	DHAR3	The protein undergoes thiolation following treatment with the oxidant tert-butylhydroperoxide.
Wa8730a011g000210	1.05242	1.04809e-15	1.46124e-11	0.334	0.203	AT5G16240 AT3G02630		Plant stearoyl-acyl-carrier-protein desaturase family protein Plant stearoyl-acyl-carrier-protein desaturase family protein
Wa8730a014g001630	1.04371	1.51311e-41	2.10957e-37	0.437	0.165
Wa8730a004g007170	1.03072	2.25464e-12	3.14342e-08	0.356	0.253	AT1G06460	ACD31.2, ACD32.1	ACD32.1 encodes an alpha-crystallin domain containing protein with homology to small heat shock proteins.
Wa8730a006g002880	1.01816	9.0095e-17	1.25611e-12	0.299	0.161	AT3G25400
Wa8730a014g001620	1.00778	1.38571e-23	1.93196e-19	0.316	0.134
Wa8730a007g004260	1.00302	2.11164e-19	2.94405e-15	0.231	0.095	AT4G08910 AT1G22250 AT1G78170
Wa8730a016g003000	1.0008	1.86965e-26	2.60666e-22	0.635	0.423	AT1G68530 AT1G25450 AT2G26640 AT1G19440 AT1G71160	CER6, CUT1, G2, KCS6, POP1 CER60, KCS5 KCS11 KCS4 KCS7	Encodes KCS6, a member of the 3-ketoacyl-CoA synthase family involved in the biosynthesis of VLCFA (very long chain fatty acids). Encodes KCS5, a member of the 3-ketoacyl-CoA synthase family involved in the biosynthesis of VLCFA (very long chain fatty acids). Encodes KCS11, a member of the 3-ketoacyl-CoA synthase family involved in the biosynthesis of VLCFA (very long chain fatty acids). Encodes …

## Sheet: Dusk C2 DEGs
Dataset S4. Differentially Expressed Genes for Dusk Cluster 2
Genes showing significant differential expression (log2FC>1 & p_val_adj <0.05 & PCT1 > 10%) in the given cluster versus all other cells in the dataset
PCT1: Percentage of cells within the cluster expressing the gene
PCT2: Percentage of cells outside the cluster expressing the gene
Gene	Ave. Log2 FC	p Value	p Value Adj.	PCT1	PCT2	Arabidopsis orthologues	Arabidopsis gene names	Arabidopsis gene description
Wa8730a006g002780	2.88269	1.35788e-31	1.89316e-27	0.783	0.571
Wa8730a006g002770	2.64739	1.3686e-38	1.90811e-34	0.311	0.098	AT1G22450	ATCOX6B2, COX6B	subunit 6b of cytochrome c oxidase
Wa8730a020g003110	2.1157	2.09628e-10	2.92263e-06	0.351	0.237	AT1G24577
Wa8730a009g002620	1.69661	1.11714e-15	1.55752e-11	0.983	0.987
Wa8730a005g004040	1.57468	1.15217e-61	1.60635e-57	0.663	0.305	AT2G46330 AT3G61640 AT5G53250	AGP16, ATAGP16 AGP20, AtAGP20 AGP22, ATAGP22	Encodes arabinogalactan protein (AGP16). arabinogalactan protein 20 arabinogalactan protein 22
Wa8730a001g008310	1.57191	1.0784e-67	1.50351e-63	0.823	0.585	AT1G15820	CP24, LHCB6	Lhcb6 protein (Lhcb6), light harvesting complex of photosystem II.
Wa8730a005g003780	1.44296	3.24e-15	4.51721e-11	0.17	0.065	AT4G23630 AT4G11220 AT5G41600 AT1G64090 AT4G01230 AT2G46170 AT3G61560	BTI1, RTNLB1 BTI2, RTNLB2 BTI3, RTNLB4 RTNLB3	VIRB2-interacting protein 1 VIRB2-interacting protein 2 VIRB2-interacting protein 3 Reticulan like protein B3 Reticulon family protein Reticulon family protein Reticulon family protein
Wa8730a002g009940	1.4166	5.36977e-39	7.48654e-35	0.113	0.01	AT3G23450
Wa8730a012g004140	1.41443	2.74005e-12	3.82017e-08	0.37	0.235	AT5G37600 AT3G17820 AT1G66200 AT1G48470	ATGLN1 1, ATGSR1, GLN1 1, GSR ATGSKB6, GLN1.3, GLN1 3 ATGSR2, GLN1 2, GSR2 GLN1 5	encodes a cytosolic glutamine synthetase, the enzyme has high affinity with substrate ammonium encodes a cytosolic glutamine synthetase, the enzyme has low affinity with substrate ammonium encodes a cytosolic glutamate synthetase, this enzyme has low affinity with substrate ammonium Encodes cytosolic glutamine synthase isozyme. Expression of mRNA is not detectable in roots.
Wa8730a010g003550	1.36359	3.41339e-117	4.75895e-113	1	0.997	AT1G67090 AT5G38410	RBCS1A RBCS3B	Encodes a member of the Rubisco small subunit (RBCS) multigene family: RBCS1A (At1g67090), RBCS1B (At5g38430), RBCS2B (At5g38420), and RBCS3B (At5g38410). Functions to yield sufficient Rubisco content for leaf photosynthetic capacity. Encodes a member of the Rubisco small subunit (RBCS) multigene family: RBCS1A (At1g67090), RBCS1B (At5g38430), RBCS2B (At5g38420), and RBCS3B (At5g38410). Functions…
Wa8730a014g005090	1.32301	1.49616e-60	2.08594e-56	0.637	0.269	AT1G12090 AT4G00165 AT4G22460 AT1G62510 AT2G45180 AT4G12510	ELP	extensin-like protein (ELP) Bifunctional inhibitor/lipid-transfer protein/seed storage 2S albumin superfamily protein Bifunctional inhibitor/lipid-transfer protein/seed storage 2S albumin superfamily protein Bifunctional inhibitor/lipid-transfer protein/seed storage 2S albumin superfamily protein Bifunctional inhibitor/lipid-transfer protein/seed storage 2S albumin superfamily protein Encodes a m…
Wa8730a009g000490	1.31164	1.92977e-104	2.69048e-100	0.995	0.991	AT2G39730 AT5G59250	RCA	Rubisco activase, a nuclear-encoded chloroplast protein that consists of two isoforms arising from alternative splicing in most plants. Required for the light activation of rubisco. Major facilitator superfamily protein
Wa8730a007g005080	1.16182	5.07195e-70	7.07131e-66	0.96	0.876	AT4G10340	LHCB5	photosystem II encoding the light-harvesting chlorophyll a/b binding protein CP26 of the antenna system of the photosynthetic apparatus
Wa8730a005g007240	1.11866	1.01293e-53	1.41223e-49	0.884	0.737	AT1G67090 AT5G38430	RBCS1A RBCS1B	Encodes a member of the Rubisco small subunit (RBCS) multigene family: RBCS1A (At1g67090), RBCS1B (At5g38430), RBCS2B (At5g38420), and RBCS3B (At5g38410). Functions to yield sufficient Rubisco content for leaf photosynthetic capacity. Encodes a member of the Rubisco small subunit (RBCS) multigene family: RBCS1A (At1g67090), RBCS1B (At5g38430), RBCS2B (At5g38420), and RBCS3B (At5g38410).
Wa8730a002g003250	1.10055	6.15528e-26	8.58168e-22	0.217	0.065	AT1G12090 AT4G00165 AT4G22460 AT2G45180 AT1G62510 AT5G46900 AT4G12510	ELP	extensin-like protein (ELP) Bifunctional inhibitor/lipid-transfer protein/seed storage 2S albumin superfamily protein Bifunctional inhibitor/lipid-transfer protein/seed storage 2S albumin superfamily protein Bifunctional inhibitor/lipid-transfer protein/seed storage 2S albumin superfamily protein Bifunctional inhibitor/lipid-transfer protein/seed storage 2S albumin superfamily protein Bifunctiona…
Wa8730a005g008430	1.08622	2.97895e-42	4.15325e-38	0.807	0.565	AT1G67090 AT5G38430	RBCS1A RBCS1B	Encodes a member of the Rubisco small subunit (RBCS) multigene family: RBCS1A (At1g67090), RBCS1B (At5g38430), RBCS2B (At5g38420), and RBCS3B (At5g38410). Functions to yield sufficient Rubisco content for leaf photosynthetic capacity. Encodes a member of the Rubisco small subunit (RBCS) multigene family: RBCS1A (At1g67090), RBCS1B (At5g38430), RBCS2B (At5g38420), and RBCS3B (At5g38410).
Wa8730a009g004480	1.08367	1.7504e-72	2.44041e-68	0.96	0.916
Wa8730a006g005790	1.08341	1.06565e-30	1.48573e-26	0.715	0.522	AT1G15820	CP24, LHCB6	Lhcb6 protein (Lhcb6), light harvesting complex of photosystem II.
Wa8730a006g007000	1.06731	5.50506e-42	7.67515e-38	0.292	0.077	AT1G72610 AT5G20630	ATGER1, GER1, GLP1 ATGER3, GER3, GLP3, GLP3A, GLP3B	germin-like protein (GLP1) Encodes a germin-like protein. Its transcripts are more abundant in RNA from leaves collected in the evening, suggesting some kind of circadian regulation.
Wa8730a008g004910	1.06391	2.85513e-09	3.98063e-05	0.502	0.378
Wa8730a010g002810	1.05891	1.52264e-69	2.12287e-65	0.983	0.987	AT1G23730 AT1G70410	ATBCA3, BCA3 ATBCA4, BCA4, CA4	beta carbonic anhydrase 3 Encodes a putative beta-carbonic anhydrase betaCA4. Together with betaCA1 (At3g01500) regulates CO2-controlled stomatal movements in guard cells.
Wa8730a018g003740	1.0514	1.92123e-51	2.67858e-47	0.906	0.832	AT1G09340	CRB, CSP41B, HIP1.3	Encodes CHLOROPLAST RNA BINDING (CRB), a putative RNA-binding protein. CRB is important for the proper functioning of the chloroplast. Mutations in CRB also affects the circadian system, altering the expression of both oscillator and output genes.
Wa8730a009g005910	1.04824	4.38993e-47	6.12044e-43	0.882	0.741	AT5G54270	LHCB3, LHCB3*1	Lhcb3 protein is a component of the main light harvesting chlorophyll a/b-protein complex of Photosystem II (LHC II).
Wa8730a006g004690	1.03629	5.91201e-26	8.24253e-22	0.493	0.252	AT5G15230 AT3G02885 AT1G74670	GASA4 GASA5 GASA6	gibberellin-regulated (GASA4) GASA5, is involved in the regulation of seedling thermotolerance. Gibberellin-regulated family protein
Wa8730a008g004450	1.02216	3.32974e-65	4.64232e-61	0.979	0.956	AT4G21280 AT4G05180	PSBQ, PSBQ-1, PSBQA PSBQ, PSBQ-2, PSII-Q	Encodes the PsbQ subunit of the oxygen evolving complex of photosystem II. Encodes the PsbQ subunit of the oxygen evolving complex of photosystem II.
Wa8730a005g007230	1.00603	2.11719e-42	2.95178e-38	0.781	0.537	AT1G67090 AT5G38420	RBCS1A RBCS2B	Encodes a member of the Rubisco small subunit (RBCS) multigene family: RBCS1A (At1g67090), RBCS1B (At5g38430), RBCS2B (At5g38420), and RBCS3B (At5g38410). Functions to yield sufficient Rubisco content for leaf photosynthetic capacity. Encodes a member of the Rubisco small subunit (RBCS) multigene family: RBCS1A (At1g67090), RBCS1B (At5g38430), RBCS2B (At5g38420), and RBCS3B (At5g38410).
Wa8730a006g005330	1.00245	5.61871e-80	7.83361e-76	0.988	0.979	AT1G12900 AT1G42970 AT3G04120	GAPA-2 GAPB GAPC, GAPC-1, GAPC1	glyceraldehyde 3-phosphate dehydrogenase A subunit 2 Encodes chloroplast localized glyceraldehyde-3-phosphate dehydrogenase that can use both NADH and NADPH to reduce 1,3-diphosphate glycerate. It forms A2B2 heterotetramers with GapA forms of the GADPH enzyme. These complexes are active in the light under reducing conditions, but show reduced NADPH-dependent activity in response to oxidized thior…

## Sheet: Dusk C3 DEGs
Dataset S4. Differentially Expressed Genes for Dusk Cluster 3
Genes showing significant differential expression (log2FC>1 & p_val_adj <0.05 & PCT1 > 10%) in the given cluster versus all other cells in the dataset
PCT1: Percentage of cells within the cluster expressing the gene
PCT2: Percentage of cells outside the cluster expressing the gene
Gene	Ave. Log2 FC	p Value	p Value Adj.	PCT1	PCT2	Arabidopsis orthologues	Arabidopsis gene names	Arabidopsis gene description
Wa8730a002g005100	3.98008	3.18489e-24	4.44037e-20	0.285	0.106
Wa8730a018g002300	2.97425	8.15038e-206	1.13633e-201	0.873	0.183	AT5G57800	CER3, FLP1, WAX2, YRE	encodes a transmembrane protein with similarity to the sterol desaturase family at the N-terminus and to the short-chain dehydrogenase/reductase family at the C-terminus. Mutant analyses indicate this protein is involved in cuticle membrane and wax biosynthesis.
Wa8730a005g003480	2.66352	1.25035e-183	1.74324e-179	0.749	0.115	AT5G25610	ATRD22, RD22	responsive to dehydration 22 (RD22) mediated by ABA
Wa8730a003g005260	2.61088	8.43333e-193	1.17577e-188	0.949	0.284	AT1G68530 AT1G25450 AT2G26640 AT4G34510 AT5G43760 AT1G19440	CER6, CUT1, G2, KCS6, POP1 CER60, KCS5 KCS11 KCS17 KCS20 KCS4	Encodes KCS6, a member of the 3-ketoacyl-CoA synthase family involved in the biosynthesis of VLCFA (very long chain fatty acids). Encodes KCS5, a member of the 3-ketoacyl-CoA synthase family involved in the biosynthesis of VLCFA (very long chain fatty acids). Encodes KCS11, a member of the 3-ketoacyl-CoA synthase family involved in the biosynthesis of VLCFA (very long chain fatty acids). Encodes …
Wa8730a018g000750	2.54987	1.85925e-230	2.59217e-226	0.806	0.104	AT3G55120	A11, AtCHI, CFI, CHI, TT5	Catalyzes the conversion of chalcones into flavanones. Required for the accumulation of purple anthocyanins in leaves and stems.
Wa8730a014g001630	2.48184	2.48237e-210	3.46092e-206	0.811	0.128
Wa8730a013g003830	2.46338	1.06361e-43	1.48288e-39	0.634	0.303
Wa8730a013g001880	2.43341	3.7511e-206	5.22978e-202	0.772	0.108	AT1G07240	UGT71C5	Encodes a UDP-glucosyltransferase that plays a role in abscisic acid (ABA) glucosylation from ABA to ABA-glucose ester and regulates ABA homeostasis, thereby influencing the ABA signal network.
Wa8730a009g003660	2.42368	2.64578e-60	3.68875e-56	0.732	0.332	AT2G38530	LP2, LTP2, cdf3	Involved in lipid transfer between membranes. Belongs to a family of Lipid transfer proteins. Sequence similarity to other plant/Arabidopsis LPT genes but highest similarity to LPT1. Stress and pathogen-inducible motifs found in the upstream region. Expressed in flower, leaves and siliques but absent in roots. Predicted to be a member of PR-14 pathogenesis-related protein family with the followin…
Wa8730a006g002600	2.39673	9.31594e-264	1.29883e-259	0.766	0.069	AT1G79460	ATKS, ATKS1, GA2, KS, KS1	Encodes for a protein with ent-kaurene synthase B activity which catalyzes the second step in the cyclization of GGPP to ent-kaurene in the gibberellins biosynthetic pathway.
Wa8730a013g005140	2.33312	3.20967e-159	4.47492e-155	0.811	0.187
Wa8730a002g004860	2.25459	7.36692e-35	1.0271e-30	0.166	0.027	AT2G27380 AT1G20130	ATEPR1, EPR1	Encodes an extensin like gene involved in seed germination. GDSL-motif esterase/acyltransferase/lipase. Enzyme group with broad substrate specificity that may catalyze acyltransfer or hydrolase reactions with lipid and non-lipid substrates.
Wa8730a012g003470	2.25424	1.57849e-182	2.20073e-178	0.918	0.234	AT1G53830 AT3G14310 AT4G33220 AT5G49180 AT5G20860 AT3G43270	ATPME2, PME2 ATPME3, OZS2, PME3 ATPME44, PME44	encodes a pectin methylesterase encodes a pectin methylesterase, targeted by a cellulose binding protein (CBP) from the parasitic nematode Heterodera schachtii during parasitism. pectin methylesterase 44 Encodes a putative pectin methylesterase. The gene is preferentially expressed in floral buds. Plant invertase/pectin methylesterase inhibitor superfamily Plant invertase/pectin methylesterase in…
Wa8730a001g004950	2.24179	2.35002e-169	3.2764e-165	0.966	0.31
Wa8730a014g005820	2.22477	2.52561e-201	3.52121e-197	0.879	0.179	AT3G10280 AT4G34510 AT1G04220 AT5G43760 AT1G19440 AT2G16280	KCS14 KCS17 KCS2 KCS20 KCS4 KCS9	Encodes KCS14, a member of the 3-ketoacyl-CoA synthase family involved in the biosynthesis of VLCFA (very long chain fatty acids). Encodes KCS17, a member of the 3-ketoacyl-CoA synthase family involved in the biosynthesis of VLCFA (very long chain fatty acids). Encodes KCS2, a member of the 3-ketoacyl-CoA synthase family involved in the biosynthesis of VLCFA (very long chain fatty acids). Encodes…
Wa8730a001g001120	2.22112	6.218e-156	8.66914e-152	0.865	0.219
Wa8730a014g001620	2.2153	7.4526e-197	1.03904e-192	0.71	0.091
Wa8730a007g003940	2.19872	1.72533e-124	2.40545e-120	0.344	0.025	AT5G13930	ATCHS, CHS, TT4	Encodes chalcone synthase (CHS), a key enzyme involved in the biosynthesis of flavonoids. Required for the accumulation of purple anthocyanins in leaves and stems. Also involved in the regulation of auxin transport and the modulation of root gravitropism.
Wa8730a001g007340	2.07043	2.87167e-154	4.00368e-150	0.904	0.24	AT2G18800 AT2G06850 AT4G30270 AT4G14130 AT4G25810 AT5G57550	ATXTH21, XTH21 EXGT-A1, EXT, XTH4 MERI-5, MERI5B, SEN4, XTH24 XTH15, XTR7 XTH23, XTR6 XTH25, XTR3	xyloglucan endotransglucosylase/hydrolase 21 endoxyloglucan transferase (EXGT-A1) gene encodes a protein similar to endo xyloglucan transferase in sequence. It is also very similar to BRU1 in soybean, which is involved in brassinosteroid response. xyloglucan endotransglycosylase-related protein (XTR7) xyloglucan endotransglycosylase-related protein (XTR6) xyloglucan endotransglycosylase-related p…
Wa8730a002g009150	2.04867	3.38593e-160	4.72066e-156	0.67	0.102	AT1G65060 AT4G19010	4CL3	encodes an isoform of 4-coumarate:CoA ligase (4CL), which is involved in the last step of the general phenylpropanoid pathway. mRNA levels are not induced in response to wounding or to fungal infection by P. parasitica. mRNA is expressed in flowers, to a lesser degree in mature leaves and siliques and marginally in seedling roots and bolting stems of mature plants. The catalytic efficiency was in…
Wa8730a015g005080	2.02767	8.79773e-218	1.22658e-213	0.893	0.144
Wa8730a008g000530	2.02716	1.70678e-106	2.37959e-102	0.758	0.235
Wa8730a011g004580	2.02408	4.68013e-173	6.52504e-169	0.476	0.035	AT5G57800	CER3, FLP1, WAX2, YRE	encodes a transmembrane protein with similarity to the sterol desaturase family at the N-terminus and to the short-chain dehydrogenase/reductase family at the C-terminus. Mutant analyses indicate this protein is involved in cuticle membrane and wax biosynthesis.
Wa8730a011g004730	2.00632	7.76004e-208	1.0819e-203	0.6	0.051	AT5G57800	CER3, FLP1, WAX2, YRE	encodes a transmembrane protein with similarity to the sterol desaturase family at the N-terminus and to the short-chain dehydrogenase/reductase family at the C-terminus. Mutant analyses indicate this protein is involved in cuticle membrane and wax biosynthesis.
Wa8730a009g001610	2.00617	9.43165e-99	1.31496e-94	0.758	0.248	AT5G59320	LTP3	Predicted to encode a PR (pathogenesis-related) protein. Belongs to the lipid transfer protein (PR-14) family with the following members: At2g38540/LTP1, At2g38530/LTP2, At5g59320/LTP3, At5g59310/LTP4, At3g51600/LTP5, At3g08770/LTP6, At2g15050/LTP7, At2g18370/LTP8, At2g15325/LTP9, At5g01870/LTP10, At4g33355/LTP11, At3g51590/LTP12, At5g44265/LTP13, At5g62065/LTP14, At4g08530/LTP15.
Wa8730a017g001990	1.95296	5.47056e-150	7.62705e-146	0.944	0.317
Wa8730a004g007430	1.95256	1.24817e-112	1.7402e-108	0.963	0.608
Wa8730a001g011170	1.94305	7.69537e-158	1.07289e-153	0.935	0.305	AT5G02540 AT2G37540 AT4G11410		NAD(P)-binding Rossmann-fold superfamily protein NAD(P)-binding Rossmann-fold superfamily protein NAD(P)-binding Rossmann-fold superfamily protein
Wa8730a009g001620	1.94111	2.22771e-100	3.10587e-96	0.29	0.023	AT5G05270	AtCHIL, CHIL	Chalcone-flavanone isomerase family protein
Wa8730a015g005520	1.92132	4.0273e-168	5.61486e-164	0.825	0.157
Wa8730a020g002750	1.90442	4.94336e-192	6.89204e-188	0.825	0.132	AT1G67730 AT1G24470	ATKCR1, KCR1, YBR159 ATKCR2, KCR2	Encodes one of the two Arabidopsis homologues to YBR159w encoding a S. cerevisiae beta-ketoacyl reductase (KCR), which catalyzes the first reduction during VLCFA (very long chain fatty acids, >18 carbon) elongation: KCR1 (At1g67730), KCR2 (At1g24470). Complementation of the yeast ybr159Delta mutant demonstrated that the two KCR proteins are divergent and that only AtKCR1 can restore heterologous …
Wa8730a017g002740	1.87098	8.79919e-155	1.22678e-150	0.865	0.226	AT2G16530 AT1G72590		Encodes polyprenol reductase involved in N-gylcosylation. Mutants are defective in pollen development. Knockouts are embryo lethal Encodes a polyphenol reductase.
Wa8730a012g001190	1.78299	3.17398e-187	4.42516e-183	0.741	0.111	AT3G12203 AT1G33540 AT5G09640 AT3G52000	scpl17 scpl18 SCPL19, SNG2 scpl36	serine carboxypeptidase-like 17 serine carboxypeptidase-like 18 encodes a serine carboxypeptidase-like (SCPL) protein. Mutants accumulate sinapoylglucose instead of sinapoylcholine, and have increased levels of choline and decreased activity of the enzyme sinapoylglucose:choline sinapoyltransferase. serine carboxypeptidase-like 36
Wa8730a018g003530	1.774	2.55639e-139	3.56412e-135	0.901	0.278	AT1G60810 AT1G09430	ACLA-2 ACLA-3	One of the three genes encoding subunit A of the trimeric enzyme ATP Citrate lyase Encodes subunit A of the heteromeric enzyme ATP citrate lyase (ACL). In animals, ACL is encoded by a single gene ACL in Arabidopsis is composed of two polypeptides, ACLA (encoded by 3 genes) and ACLB (encoded by 2 genes). The holoenzyme has an A(4)B(4)stoichiometry. Expression of both ACLA and ACLB but not of eithe…
Wa8730a008g000170	1.75386	1.88439e-104	2.62721e-100	0.49	0.079
Wa8730a019g001620	1.75234	3.92092e-197	5.46655e-193	0.842	0.132	AT3G66658 AT1G44170	ALDH22A1 ALDH3H1, ALDH4	Encodes a putative aldehyde dehydrogenase. The gene is not responsive to osmotic stress and is expressed constitutively at a low level in plantlets and root cultures. Encodes a protein similar to the aldehyde dehydrogenase cp-ADH from C.plantagineum. Constitutively expressed at low levels.
Wa8730a009g001730	1.7476	1.16146e-145	1.61931e-141	0.924	0.286	AT2G41290 AT1G08470 AT3G57030 AT3G51440	SSL2 SSL3	Although this enzyme is predicted to encode a strictosidine synthase (SS), it lacks a conserved catalytic glutamate residue found in active SS enzymes and it is not expected to have SS activity. Although this enzyme is predicted to encode a strictosidine synthase (SS), it lacks a conserved catalytic glutamate residue found in active SS enzymes and it is not expected to have SS activity. Calcium-d…
Wa8730a001g010900	1.70734	1.24218e-149	1.73185e-145	0.775	0.166	AT5G16710	DHAR3	The protein undergoes thiolation following treatment with the oxidant tert-butylhydroperoxide.
Wa8730a014g000630	1.69028	6.8846e-92	9.59851e-88	0.941	0.507
Wa8730a008g004080	1.6862	1.66234e-182	2.31764e-178	0.693	0.098	AT1G11840	ATGLX1, GLX1	Encodes a glyoxalase I homolog ATGLX1.
Wa8730a007g007620	1.67453	1.47222e-132	2.05257e-128	0.535	0.075
Wa8730a006g005060	1.64266	3.34566e-152	4.66452e-148	0.913	0.221	AT5G15290 AT1G14160	CASP5	Uncharacterised protein family (UPF0497) Uncharacterised protein family (UPF0497)
Wa8730a016g000400	1.63394	1.0806e-22	1.50658e-18	0.124	0.024	AT5G15160	BHLH134, BNQ2	BNQ2 belongs to a family of atypical non-DNA binding basic helix-loop-helix (bHLH) proteins that heterodimerize with and negatively regulate bHLH transcription factors. Directly and negatively regulated by AP3 and PI in petals.Required for appropriate regulation of flowering time.
Wa8730a005g008830	1.60109	5.28201e-98	7.36418e-94	0.904	0.404	AT1G30020		Protein of unknown function, DUF538
Wa8730a011g001270	1.59037	1.13302e-168	1.57965e-164	0.761	0.135	AT1G76470 AT1G65010		NAD(P)-binding Rossmann-fold superfamily protein Putative role in flower development. Comparison of SALK_061426C to Columbia wild type in normal lighting and under low light of 33 micromoles per meter-squared per second resulted in a trend toward earlier bolting in the mutant under low light (P=0.055) (Ann Stapleton and Patrick Pridgen, 2009, personal communication).
Wa8730a012g004670	1.5902	3.66163e-113	5.10504e-109	0.521	0.086	AT4G39980 AT4G33510 AT1G22410	DHS1 DHS2	Encodes a 2-deoxy-D-arabino-heptulosonate 7-phosphate (DAHP) synthase, which catalyzes the first committed step in aromatic amino acid biosynthesis. Gene expression is induced by wounding and pathogenic bacteria Pseudomonas syringae. Enzyme catalyzing the first committed step in aromatic amino acid biosynthesis Class-II DAHP synthetase family protein
Wa8730a010g004870	1.58786	8.32907e-134	1.16124e-129	0.845	0.231	AT5G48230	AACT2, ACAT2, EMB1276	Encodes an acetoacetyl-CoA thiolase that generates the bulk of the acetoacetyl-CoA precursor needed for the cytosolic localized, mevalonate-derived isoprenoids biosynthetic pathway. Loss-of-function mutants are embryo lethal.
Wa8730a004g002220	1.58628	5.7931e-144	8.07674e-140	0.496	0.052	AT5G55620 AT5G41761
Wa8730a001g011890	1.57819	1.20138e-96	1.67496e-92	0.935	0.49	AT5G59530 AT2G44800 AT5G43450		2-oxoglutarate (2OG) and Fe(II)-dependent oxygenase superfamily protein 2-oxoglutarate (2OG) and Fe(II)-dependent oxygenase superfamily protein encodes a protein whose sequence is similar to ACC oxidase
Wa8730a006g004320	1.57184	2.08391e-122	2.90538e-118	0.87	0.287	AT2G41480 AT5G64120 AT1G14540 AT5G66390 AT2G34060 AT5G15180 AT5G39580 AT3G03670 AT1G49570	AtPRX25, PRX25 AtPRX71, PRX71 PER4 PRX72	Encodes a cationic cell-wall-bound peroxidase homolog that is involved in the lignification of cell walls. encodes a cell wall bound peroxidase that is induced by hypo-osmolarity Peroxidase superfamily protein Encodes a peroxidase that is involved in lignin biosynthesis. Peroxidase superfamily protein Peroxidase superfamily protein Peroxidase superfamily protein Peroxidase superfamily protein Per…
Wa8730a006g004490	1.56843	4.06853e-119	5.67235e-115	0.887	0.31	AT1G24470	ATKCR2, KCR2	Encodes one of the two Arabidopsis homologues to YBR159w encoding a S. cerevisiae beta-ketoacyl reductase (KCR), which catalyzes the first reduction during VLCFA (very long chain fatty acids, >18 carbon) elongation: KCR1 (At1g67730), KCR2 (At1g24470). Complementation of the yeast ybr159Delta mutant demonstrated that the two KCR proteins are divergent and that only AtKCR1 can restore heterologous …
Wa8730a008g005930	1.56392	3.93405e-256	5.48485e-252	0.625	0.035	AT4G21380 AT4G28350 AT1G50610 AT4G03230 AT1G61610 AT4G27290 AT1G11300	ARK3, RK3 LecRK-VII.2 PRK5	encodes a putative receptor-like serine/threonine protein kinases that is similar to Brassica self-incompatibility (S) locus. Expressed in root. Shoot expression limited to limited to the root-hypocotyl transition zone and at the base of lateral roots as well as in axillary buds, and pedicels. Concanavalin A-like lectin protein kinase family protein Leucine-rich repeat protein kinase family prote…
Wa8730a016g000380	1.54876	3.48293e-81	4.8559e-77	0.296	0.034	AT1G69640 AT1G14290	SBH1 SBH2	Encodes one of the two redundant sphingoid base hydroxylases (SBH). Involved in sphingolipid trihydroxy long-chain base (4-hydroxysphinganine) biosynthesis. Double mutants of SBHs were dwarfed and not able to progress from vegetative to reproductive growth. Encodes one of the two redundant sphingoid base hydroxylases (SBH). Involved in sphingolipid trihydroxy long-chain base (4-hydroxysphinganine…
Wa8730a003g000920	1.53306	8.46217e-186	1.1798e-181	0.648	0.075
Wa8730a013g005120	1.5316	1.65714e-170	2.31038e-166	0.662	0.091
Wa8730a011g004850	1.50662	3.87051e-156	5.39627e-152	0.727	0.121
Wa8730a015g004980	1.5006	2.37742e-140	3.3146e-136	0.82	0.202	AT4G34135 AT2G15490 AT1G24100 AT2G23250	UGT73B2 UGT73B4 UGT74B1 UGT84B2	The At4g34135 gene encodes a flavonol 7-O-glucosyltransferase (EC 2.4.1.237) that glucosylates also with a 20 fold lower activity flavonols (kaempferol and quercetin) at the 3-O-position. UDP-glycosyltransferase 73B4 Encodes a UDP-glucose:thiohydroximate S-glucosyltransferase, involved in glucosinolate biosynthesis UDP-glucosyl transferase 84B2
Wa8730a016g003000	1.47072	4.92139e-93	6.8614e-89	0.907	0.396	AT1G68530 AT1G25450 AT2G26640 AT1G19440 AT1G71160	CER6, CUT1, G2, KCS6, POP1 CER60, KCS5 KCS11 KCS4 KCS7	Encodes KCS6, a member of the 3-ketoacyl-CoA synthase family involved in the biosynthesis of VLCFA (very long chain fatty acids). Encodes KCS5, a member of the 3-ketoacyl-CoA synthase family involved in the biosynthesis of VLCFA (very long chain fatty acids). Encodes KCS11, a member of the 3-ketoacyl-CoA synthase family involved in the biosynthesis of VLCFA (very long chain fatty acids). Encodes …
Wa8730a009g002200	1.44178	2.80603e-160	3.91217e-156	0.721	0.114	AT3G05020 AT5G27200	ACP, ACP1 ACP5	encodes an acyl carrier protein expressed in leaves, roots, and dry seeds. Protein is not regulated by light. encodes an acyl carrier protein
Wa8730a007g006660	1.44059	1.12529e-154	1.56889e-150	0.566	0.07	AT1G21680		DPP6 N-terminal domain-like protein
Wa8730a008g000510	1.43764	7.55249e-49	1.05297e-44	0.479	0.157
Wa8730a004g004850	1.42998	5.90857e-113	8.23773e-109	0.848	0.285	AT3G21690 AT1G61890 AT4G21910 AT1G11670		MATE efflux family protein MATE efflux family protein MATE efflux family protein MATE efflux family protein
Wa8730a015g005880	1.42838	1.09055e-110	1.52044e-106	0.665	0.153	AT2G24150	HHP3	heptahelical transmembrane protein HHP3
Wa8730a006g002880	1.42833	3.80153e-165	5.30009e-161	0.721	0.112	AT3G25400
Wa8730a001g009230	1.4231	1.72142e-76	2.40001e-72	0.217	0.016	AT1G50520 AT4G12330 AT5G48000 AT1G13090	CYP705A27 CYP706A7 CYP708, CYP708A2, THAH, THAH1 CYP71B28	member of CYP705A member of CYP706A Encodes a member of the CYP708A family of cytochrome P450 enzymes. THAH appears to add a hydroxyl group to the triterpene thalianol. thah1 mutants have an elevated accumulation of thalianol. thah1-1 mutants have longer roots than wild type plants. Thalian-diol and desaturated thalian-diol are lost from the root extracts of thah1-1 mutants. Overexpression of the…
Wa8730a008g003960	1.41301	1.96917e-34	2.74542e-30	0.862	0.677
Wa8730a016g002580	1.4033	1.2453e-123	1.7362e-119	0.797	0.197	AT1G65820		microsomal glutathione s-transferase, putative
Wa8730a016g001110	1.39035	1.21518e-115	1.6942e-111	0.811	0.221	AT1G36160	ACC1, AT-ACC1, EMB22, GK, GSD1, PAS3, SFR3	Encodes acetyl-CoA carboxylase. Mutant displays uncoordinated cell divisions which are enhanced by cytokinins. Mutant also has aberrant organization of the apical region in the embryo and abnormal root and shoot development. Essential for very long chain fatty acid elongation.
Wa8730a016g000330	1.38828	1.69113e-102	2.35778e-98	0.794	0.239	AT3G47710 AT1G26945	BHLH161, BNQ3 KDR, PRE6	BNQ3 belongs to a family of atypical non-DNA binding basic helix-loop-helix (bHLH) proteins that heterodimerize with and negatively regulate bHLH transcription factors. Directly and negatively regulated by AP3 and PI in petals. Required for appropriate regulation of flowering time.May also have a role in regulating light responses. Encodes a basic helix-loop-helix (bHLH) protein involved in blue/…
Wa8730a013g004070	1.38644	1.51614e-223	2.1138e-219	0.651	0.054	AT5G23210 AT5G08260 AT3G63470	SCPL34 scpl35 scpl40	serine carboxypeptidase-like 34 serine carboxypeptidase-like 35 serine carboxypeptidase-like 40
Wa8730a007g005460	1.37897	2.44964e-84	3.41529e-80	0.91	0.405
Wa8730a004g004940	1.37701	8.51684e-124	1.18742e-119	0.442	0.049	AT2G20835
Wa8730a007g004260	1.35231	8.97228e-164	1.25091e-159	0.558	0.058	AT4G08910 AT1G22250 AT1G78170
Wa8730a007g003870	1.3476	5.87386e-183	8.18934e-179	0.69	0.09	AT5G13400		Major facilitator superfamily protein
Wa8730a015g004500	1.34296	2.50672e-108	3.49486e-104	0.78	0.225	AT1G60010 AT1G10530
Wa8730a011g003900	1.34004	6.5186e-108	9.08824e-104	0.701	0.172	AT4G34480 AT5G67460 AT4G26830 AT5G55180		O-Glycosyl hydrolases family 17 protein O-Glycosyl hydrolases family 17 protein O-Glycosyl hydrolases family 17 protein O-Glycosyl hydrolases family 17 protein
Wa8730a003g006910	1.33986	1.44411e-110	2.01337e-106	0.42	0.05	AT3G63410	APG1, E37, IEP37, VTE3	Encodes a MPBQ/MSBQ methyltransferase located in the chloroplast inner envelope membrane. Mutant plants lack plastoquinone (PQ), suggesting that the APG1 protein is involved in the methylation step of PQ biosynthesis. The gene product is also involved in tocopherol (vitamin E) biosynthesis.
Wa8730a003g003400	1.33618	2.44137e-136	3.40376e-132	0.586	0.083	AT4G16442		Uncharacterised protein family (UPF0497)
Wa8730a010g004880	1.33153	7.0025e-91	9.76288e-87	0.876	0.365	AT5G55850 AT5G63270 AT5G40645	NOI	NOI protein RPM1-interacting protein 4 (RIN4) family protein RPM1-interacting protein 4 (RIN4) family protein
Wa8730a008g004660	1.32382	2.54156e-58	3.54345e-54	0.358	0.073
Wa8730a005g001370	1.32117	2.23566e-117	3.11696e-113	0.589	0.107	AT2G28305 AT5G26140 AT2G37210 AT3G53450 AT5G03270 AT5G11950	ATLOG1, LOG1 ATLOG9, LOG9 LOG3 LOG4 LOG6 LOG8	Putative lysine decarboxylase family protein Putative lysine decarboxylase family protein Encodes a protein of unknown function. It has been crystallized and shown to be structurally almost identical to the protein encoded by At5g11950. Putative lysine decarboxylase family protein lysine decarboxylase family protein Encodes a protein of unknown function. It has been crystallized and shown to be s…
Wa8730a010g004190	1.31749	4.90854e-106	6.84349e-102	0.231	0.009	AT1G67980 AT4G26220	CCOAMT CCoAOMT7	Encodes S-adenosyl-L-methionine: transcaffeoyl Coenzyme A 3-O-methyltransferase. Encodes a caffeoyl-coenzyme A O-methyltransferase (CCoAOMT)-like protein with a strong preference for methylating the para position of flavanones and dihydroflavonols, whereas flavones and flavonols are methylated in the meta-position.
Wa8730a003g005030	1.31226	3.58114e-141	4.99282e-137	0.755	0.155	AT5G62630 AT1G74790	HIPL2	hipl2 protein precursor catalytics
Wa8730a015g003450	1.30835	2.14148e-145	2.98565e-141	0.676	0.112	AT4G12920 AT3G02740 AT5G10770	UND	Eukaryotic aspartyl protease family protein Eukaryotic aspartyl protease family protein Eukaryotic aspartyl protease family protein
Wa8730a005g002930	1.29767	1.80378e-101	2.51483e-97	0.634	0.15	AT5G11650		alpha/beta-Hydrolases superfamily protein
Wa8730a010g004460	1.29729	4.6433e-43	6.47369e-39	0.727	0.355	AT5G42380 AT1G76650	CML37 CML38	calmodulin like 37 calmodulin-like 38
Wa8730a011g000940	1.29638	1.30328e-86	1.81703e-82	0.208	0.01	AT3G21240 AT1G65060	4CL2, AT4CL2 4CL3	encodes an isoform of 4-coumarate:CoA ligase (4CL), which is involved in the last step of the general phenylpropanoid pathway. The catalytic efficiency was in the following (descending) order: p-coumaric acid, caffeic acid, ferulic acid, 5-OH-ferulic acid and cinnamic acid. At4CL2 was unable to use sinapic acid as substrate. encodes an isoform of 4-coumarate:CoA ligase (4CL), which is involved in…
Wa8730a015g001170	1.29179	1.31426e-172	1.83234e-168	0.546	0.05	AT1G16060 AT1G79700	ADAP, WRI3 WRI4	Encodes ADAP, an AP2-domain protein that interacts with ARIA. ADAP is a positive regulator of the ABA response and is also involved in regulating seedling growth. WRI4 encodes an AP2/ERF-type transcriptional activator that specifically controls cuticular wax biosynthesis in Arabidopsis stems. It also functions to activate transcription of genes involved fatty acid biosynthesis during seed and flo…
Wa8730a007g002140	1.28961	1.96873e-72	2.74481e-68	0.482	0.111	AT5G48500
Wa8730a009g005630	1.28675	4.53462e-69	6.32217e-65	0.944	0.693
Wa8730a002g009950	1.28563	1.97097e-188	2.74792e-184	0.67	0.074	AT2G28630 AT5G04530	KCS12 KCS19	Encodes KCS12, a member of the 3-ketoacyl-CoA synthase family involved in the biosynthesis of VLCFA (very long chain fatty acids). Encodes KCS19, a member of the 3-ketoacyl-CoA synthase family involved in the biosynthesis of VLCFA (very long chain fatty acids).
Wa8730a001g003580	1.2822	8.54091e-118	1.19077e-113	0.496	0.072	AT3G62700 AT2G47800 AT1G71330	ABCC14, ATMRP10, MRP10 ABCC4, ATMRP4, EST3, MRP4 ATNAP5, NAP5	member of MRP subfamily Encodes a plasma membrane localized ATPase transporter involved in multidrug transport. The expression of this gene is upregulated by herbicide safeners such as benoxacor, fluxofenim and fenclorim. member of NAP subfamily
Wa8730a003g005060	1.28027	3.19287e-104	4.45149e-100	0.552	0.098	AT1G68530 AT1G25450 AT2G26640 AT4G34510 AT5G43760 AT1G19440	CER6, CUT1, G2, KCS6, POP1 CER60, KCS5 KCS11 KCS17 KCS20 KCS4	Encodes KCS6, a member of the 3-ketoacyl-CoA synthase family involved in the biosynthesis of VLCFA (very long chain fatty acids). Encodes KCS5, a member of the 3-ketoacyl-CoA synthase family involved in the biosynthesis of VLCFA (very long chain fatty acids). Encodes KCS11, a member of the 3-ketoacyl-CoA synthase family involved in the biosynthesis of VLCFA (very long chain fatty acids). Encodes …
Wa8730a007g009040	1.27822	2.91964e-59	4.07056e-55	0.845	0.487	AT1G35140 AT5G09440	EXL1, PHI-1 EXL4	At1g35140 (At1g35140/T32G9_32) mRNA, complete cds EXORDIUM like 4
Wa8730a002g008940	1.27382	2.23755e-82	3.11959e-78	0.98	0.842	AT4G01470 AT5G47450 AT1G17810 AT4G17340 AT2G36830 AT1G31885	ATTIP1.3, GAMMA-TIP3, TIP1 3 ATTIP2 3, DELTA-TIP3, TIP2 3 BETA-TIP DELTA-TIP2, TIP2 2 GAMMA-TIP, GAMMA-TIP1, TIP1 1 NIP3 1	Encodes AtTIP1 3, functions as water and urea channels in pollen. Tonoplast intrinsic protein, transports ammonium (NH3) and methylammonium across the tonoplast membrane, gene expression shows diurnal regulation and is upregulated by ammonium (NH3). beta-tonoplast intrinsic protein (beta-TIP) mRNA, complete tonoplast intrinsic protein 2 2 Encodes a tonoplast intrinsic protein, which functions as …
Wa8730a012g001710	1.26678	2.43947e-132	3.40111e-128	0.594	0.092	AT5G63790	ANAC102, NAC102	Encodes a member of the NAC family of transcription factors. ANAC102 appears to have a role in mediating response to low oxygen stress (hypoxia) in germinating seedlings.
Wa8730a009g001170	1.26488	5.2938e-140	7.38062e-136	0.42	0.035	AT3G55500 AT5G05290 AT5G39300 AT2G37640 AT2G28950 AT2G40610 AT5G02260	ATEXP16, ATEXPA16, ATHEXP, EXP16, EXPA16 ATEXP2, ATEXPA2, ATHEXP, EXP2, EXPA2 ATEXP25, ATEXPA25, ATHEXP, EXP25, EXPA25 ATEXP3, ATEXPA3, ATHEXP, EXP3 ATEXP6, ATEXPA6, ATHEXP, EXPA6 ATEXP8, ATEXPA8, ATHEXP, EXP8, EXPA8 ATEXP9, ATEXPA9, ATHEXP, EXP9, EXPA9	expansin-like protein. Naming convention from the Expansin Working Group (Kende et al, 2004. Plant Mol Bio). Involved in the formation of nematode-induced syncytia in roots of Arabidopsis thaliana. Encodes an expansin. Naming convention from the Expansin Working Group (Kende et al, 2004. Plant Mol Bio) member of Alpha-Expansin Gene Family. Naming convention from the Expansin Working Group (Kende …
Wa8730a016g001400	1.25892	2.29655e-105	3.20185e-101	0.862	0.276
Wa8730a019g003750	1.24827	3.22707e-139	4.49919e-135	0.727	0.143	AT5G02400 AT3G09400 AT2G46920 AT3G17090	PLL2 PLL3 POL	Encodes a protein with similarity to the POL locus which is a novel protein phosphatase 2C. Ubiquitously expressed. No phenotype observed in homozygous null mutant background. Similar to POLTERGEIST (POL) protein phosphatase 2C. No phenotype observed in plants homozygous for a null allele. Ubiquitously expressed. Pol mutations are recessive, partial suppressors of meristem defects in strong clv1 …
Wa8730a004g002680	1.24803	2.62124e-166	3.65453e-162	0.676	0.093
Wa8730a011g004700	1.24649	3.20217e-72	4.46446e-68	0.268	0.03	AT5G57800	CER3, FLP1, WAX2, YRE	encodes a transmembrane protein with similarity to the sterol desaturase family at the N-terminus and to the short-chain dehydrogenase/reductase family at the C-terminus. Mutant analyses indicate this protein is involved in cuticle membrane and wax biosynthesis.
Wa8730a017g003810	1.24448	7.76856e-198	1.08309e-193	0.51	0.031
Wa8730a004g004950	1.23892	2.53952e-138	3.5406e-134	0.428	0.038	AT2G20835
Wa8730a008g002540	1.20433	8.93583e-173	1.24583e-168	0.682	0.092	AT5G10480	PAS2, PEP	Protein tyrosine phosphatase-like involved in cell division and differentiation. Interacts with CDKA 1 only in its phosphorylated form, preventing dephosphorylation. Overexpression slowed down cell division in suspension cell cultures at the G2-to-M transition and early mitosis and inhibited Arabidopsis seedling growth. Localized in the cytoplasm of dividing cells but moved into the nucleus upon …
Wa8730a020g002780	1.2026	4.2908e-181	5.98223e-177	0.645	0.072	AT1G67730 AT1G24470	ATKCR1, KCR1, YBR159 ATKCR2, KCR2	Encodes one of the two Arabidopsis homologues to YBR159w encoding a S. cerevisiae beta-ketoacyl reductase (KCR), which catalyzes the first reduction during VLCFA (very long chain fatty acids, >18 carbon) elongation: KCR1 (At1g67730), KCR2 (At1g24470). Complementation of the yeast ybr159Delta mutant demonstrated that the two KCR proteins are divergent and that only AtKCR1 can restore heterologous …
Wa8730a007g002540	1.20178	8.63605e-75	1.20404e-70	0.961	0.64	AT3G23820 AT2G47650	GAE6 UXS4	UDP-D-glucuronate 4-epimerase encodes a protein similar to UDP-glucuronic acid decarboxylase. UDP-glucuronic acid decarboxylase produces UDP-xylose, which is a substrate for many cell wall carbohydrates including hemicellulose and pectin. UDP-xylose is also known to feedback regulate several cell wall biosynthetic enzymes.
Wa8730a004g005840	1.19743	2.60496e-128	3.63184e-124	0.586	0.095	AT4G37540 AT1G67100 AT1G68510	LBD39 LBD40 LBD42	LOB domain-containing protein 39 LOB domain-containing protein 40 LOB domain-containing protein 42
Wa8730a008g000640	1.1937	2.20894e-141	3.07971e-137	0.628	0.09
Wa8730a001g004070	1.19301	9.33451e-156	1.30142e-151	0.527	0.055	AT2G32460 AT3G62610 AT5G49330 AT2G47460 AT3G23250 AT4G28110 AT5G54230 AT3G13540 AT1G56160 AT5G56110 AT4G26930	ATM1, ATMYB101, MYB101 ATMYB11, MYB11, PFG2 ATMYB111, MYB111, PFG3 ATMYB12, MYB12, PFG1 ATMYB15, ATY19, MYB15 AtMYB41, MYB41 AtMYB49, MYB49 ATMYB5, MYB5 ATMYB72, MYB72 ATMYB80, AtMYB103, MS188, MYB103, MYB80 AtMYB97, MYB97	Member of the R2R3 factor gene family. Member of the R2R3 factor gene family. Member of the R2R3 factor gene family. MYB12 belongs to subgroup 7 of the R2R3-MYB family. It strongly activates the promoters of chalcone synthase (CHS), flavanone 3-hydroxylase (F3H), flavonol synthase (FLS) and - to a lesser extent - chalcone flavanone isomerase (CHI), but cannot activate the promoters of flavonoid-3…
Wa8730a001g008130	1.19123	9.51173e-53	1.32613e-48	0.868	0.585	AT5G11070
Wa8730a010g002100	1.18963	2.64948e-83	3.6939e-79	0.842	0.334	AT2G43050 AT5G53370 AT3G06830	ATPMEPCRD ATPMEPCRF, PMEPCRF	Plant invertase/pectin methylesterase inhibitor superfamily pectin methylesterase PCR fragment F Plant invertase/pectin methylesterase inhibitor superfamily
Wa8730a003g006990	1.18695	5.98367e-182	8.34244e-178	0.685	0.084	AT1G68530 AT2G26250 AT1G04220 AT1G19440	CER6, CUT1, G2, KCS6, POP1 FDH, KCS10 KCS2 KCS4	Encodes KCS6, a member of the 3-ketoacyl-CoA synthase family involved in the biosynthesis of VLCFA (very long chain fatty acids). epidermis-specific, encodes KCS10, a putative 3-ketoacyl-CoA synthase. probably involved in the synthesis of long-chain lipids found in the cuticle. Encodes KCS2, a member of the 3-ketoacyl-CoA synthase family involved in the biosynthesis of VLCFA (very long chain fatt…
Wa8730a011g002460	1.16911	1.27059e-147	1.77145e-143	0.673	0.108	AT5G61320 AT1G64950 AT3G03470 AT2G12190	CYP89A3 CYP89A5 CYP89A9	member of CYP89A member of CYP89A member of CYP89A Cytochrome P450 superfamily protein
Wa8730a008g000650	1.16734	1.83591e-42	2.55963e-38	0.848	0.68
Wa8730a012g004550	1.16591	9.56527e-83	1.33359e-78	0.597	0.152	AT4G24380 AT5G65400		alpha/beta-Hydrolases superfamily protein
Wa8730a005g005530	1.16415	4.6751e-198	6.51802e-194	0.606	0.053	AT3G49190		O-acyltransferase (WSD1-like) family protein
Wa8730a013g002970	1.16239	1.58159e-49	2.20505e-45	0.73	0.343
Wa8730a005g004920	1.15742	6.89637e-51	9.61492e-47	0.183	0.02
Wa8730a001g004140	1.15635	4.25247e-134	5.9288e-130	0.687	0.131	AT4G02100 AT2G47440 AT1G02650 AT3G62570		Heat shock protein DnaJ with tetratricopeptide repeat Tetratricopeptide repeat (TPR)-like superfamily protein Tetratricopeptide repeat (TPR)-like superfamily protein Tetratricopeptide repeat (TPR)-like superfamily protein
Wa8730a019g000710	1.15597	6.36887e-62	8.87947e-58	0.8	0.366	AT3G55150 AT2G39380 AT3G09520 AT1G07725 AT5G59730 AT2G28650	ATEXO70H1, EXO70H1 ATEXO70H2, EXO70H2 ATEXO70H4, EXO70H4 ATEXO70H6, EXO70H6 ATEXO70H7, EXO70H7 ATEXO70H8, EXO70H8	A member of EXO70 gene family, putative exocyst subunits, conserved in land plants. Arabidopsis thaliana contains 23 putative EXO70 genes, which can be classified into eight clusters on the phylogenetic tree. A member of EXO70 gene family, putative exocyst subunits, conserved in land plants. Arabidopsis thaliana contains 23 putative EXO70 genes, which can be classified into eight clusters on the …
Wa8730a001g003100	1.14864	7.63815e-89	1.06491e-84	0.766	0.26	AT4G03180 AT3G06390		Uncharacterised protein family (UPF0497)
Wa8730a009g000250	1.14847	5.22067e-83	7.27866e-79	0.961	0.608
Wa8730a004g002960	1.1483	1.27526e-85	1.77797e-81	0.679	0.194	AT4G29780 AT5G12010
Wa8730a007g002350	1.14531	2.38913e-157	3.33093e-153	0.592	0.073
Wa8730a006g007010	1.14321	8.86468e-24	1.23591e-19	0.538	0.273	AT1G72610 AT5G20630	ATGER1, GER1, GLP1 ATGER3, GER3, GLP3, GLP3A, GLP3B	germin-like protein (GLP1) Encodes a germin-like protein. Its transcripts are more abundant in RNA from leaves collected in the evening, suggesting some kind of circadian regulation.
Wa8730a007g006900	1.13375	2.11556e-89	2.94952e-85	0.823	0.288	AT4G34240 AT1G44170	ALDH3, ALDH3I1 ALDH3H1, ALDH4	Aldehyde dehydrogenase induced by ABA and dehydration Encodes a protein similar to the aldehyde dehydrogenase cp-ADH from C.plantagineum. Constitutively expressed at low levels.
Wa8730a011g000210	1.13362	2.20749e-103	3.07769e-99	0.673	0.165	AT5G16240 AT3G02630		Plant stearoyl-acyl-carrier-protein desaturase family protein Plant stearoyl-acyl-carrier-protein desaturase family protein
Wa8730a003g005690	1.1334	1.11832e-69	1.55917e-65	0.763	0.291	AT3G19320 AT1G49750 AT4G06744 AT1G25320		Leucine-rich repeat (LRR) family protein Leucine-rich repeat (LRR) family protein Leucine-rich repeat (LRR) family protein Leucine-rich repeat protein kinase family protein
Wa8730a002g007490	1.12819	2.1739e-102	3.03085e-98	0.811	0.249	AT2G38040	CAC3	encodes the carboxyltransferase alpha subunit of acetyl-CoA carboxylase, involved in de novo fatty acid biosynthesis
Wa8730a012g004760	1.12815	6.2826e-184	8.75921e-180	0.583	0.055	AT5G26340 AT1G77210 AT1G50310 AT1G34580	ATSTP13, MSS1, STP13 AtSTP14, STP14 ATSTP9, STP9	Encodes a protein with high affinity, hexose-specific/H+ symporter activity. The activity of the transporter appears to be negatively regulated by phosphorylation. Importantly, microarray analysis, as well as the study of the expression of this gene in mutants involved in programmed cell death (PCD) demonstrated a tight correlation between this gene's expression and PCD. AtSTP14 belongs to the fa…
Wa8730a003g003270	1.11893	4.16794e-73	5.81094e-69	0.414	0.079	AT5G64260	EXL2	EXORDIUM like 2
Wa8730a002g007630	1.1182	7.47138e-92	1.04166e-87	0.563	0.126	AT5G38630	ACYB-1, CYB-1	Encodes for cytochrome b561.
Wa8730a011g003410	1.11396	2.82182e-86	3.93419e-82	0.468	0.086	AT1G30360	ERD4	Early-responsive to dehydration stress protein (ERD4)
Wa8730a013g004710	1.10429	1.82211e-76	2.54038e-72	0.842	0.361	AT5G43360 AT2G32830 AT3G54700	ATPT4, PHT1 3, PHT3 PHT1 5, PHT5 PHT1 7	Encodes Pht1 3, a member of the Pht1 family of phosphate transporters which include: Pht1 1/At5g43350, Pht1 2/At5g43370, Pht1 3/At5g43360, Pht1 4/At2g38940, Pht1 5/At2g32830, Pht1 6/At5g43340, Pht1 7/At3g54700, Pht1 8/At1g20860, Pht1 9/At1g76430 (Plant Journal 2002, 31:341). Encodes Pht1 5, a member of the Pht1 family of phosphate transporters which include: Pht1 1/At5g43350, Pht1 2/At5g43370, Ph…
Wa8730a014g004410	1.10165	5.34372e-47	7.45021e-43	0.887	0.558
Wa8730a019g003580	1.10126	2.32242e-111	3.23792e-107	0.693	0.161	AT3G17120
Wa8730a007g000670	1.0971	3.89934e-73	5.43646e-69	0.693	0.234	AT1G21326		VQ motif-containing protein
Wa8730a014g005310	1.0935	9.46453e-60	1.31954e-55	0.532	0.158	AT5G24530 AT4G16770 AT4G10490 AT4G25310	DMR6	Encodes a putative 2OG-Fe(II) oxygenase that is defense-associated but required for susceptibility to downy mildew. 2-oxoglutarate (2OG) and Fe(II)-dependent oxygenase superfamily protein 2-oxoglutarate (2OG) and Fe(II)-dependent oxygenase superfamily protein 2-oxoglutarate (2OG) and Fe(II)-dependent oxygenase superfamily protein
Wa8730a009g004010	1.08979	4.50801e-68	6.28506e-64	0.915	0.51	AT2G47260 AT5G49520 AT3G62340 AT5G13080	ATWRKY23, WRKY23 ATWRKY48, WRKY48 AtWRKY68, WRKY68 ATWRKY75, WRKY75	Encodes a member of WRKY Transcription Factor Group I. Involved in nematode feeding site establishment. Encodes WRKY48, a member of the WRKY Transcription Factor. WRKY48 is a stress- and pathogen-induced transcriptional activator that represses plant basal defense. member of WRKY Transcription Factor Group II-c WRKY75 is one of several transcription factors induced during Pi deprivation. It is nu…
Wa8730a017g002730	1.08496	1.9488e-62	2.71702e-58	0.901	0.539	AT1G75600 AT1G13370		Histone superfamily protein Histone superfamily protein
Wa8730a004g004080	1.07878	4.7946e-60	6.68463e-56	0.321	0.059	AT1G16500 AT1G79160
Wa8730a001g007240	1.0754	1.14904e-53	1.60199e-49	0.606	0.223	AT3G10320 AT2G41640 AT3G57380		MUCI21 is a GT61 protein required for the production of highly branched xylan in seed coat mucilage. MUCI21 likely decorates xylan with xylose side chains that seem to be necessary for pectin attachment to the seed surface. Glycosyltransferase family 61 protein Glycosyltransferase family 61 protein
Wa8730a002g001260	1.07487	2.48155e-76	3.45978e-72	0.777	0.298	AT4G24040	ATTRE1, TRE1	Encodes a trehalase, member of Glycoside Hydrolase Family 37.
Wa8730a016g000240	1.06918	1.91716e-153	2.67291e-149	0.561	0.068	AT3G28910 AT1G74650 AT3G47600	ATMYB30, MYB30 ATMYB31, ATY13, MYB31 ATMYB94, ATMYBCP70, MYB94	transcription factor myb homologue Member of the R2R3 factor gene family. Encodes a putative transcription factor (MYB94).
Wa8730a020g003060	1.06017	1.1929e-126	1.66314e-122	0.713	0.148	AT1G24360		NAD(P)-binding Rossmann-fold superfamily protein
Wa8730a009g000590	1.05971	1.29221e-90	1.8016e-86	0.834	0.292	AT2G38050 AT3G55360	ATDET2, DET2, DWF6 ATTSC13, CER10, ECR, TSC13	Similar to mammalian steroid-5-alpha-reductase. Involved in the brassinolide biosynthetic pathway. Enoyl-CoA reductase is involved in all very long chain fatty acids (VLCFA) elongation reactions that are required for cuticular wax, storage lipid and sphingolipid metabolism. The protein is located in the ER, but in contrast to its yeast homolog TSC13 is not particularly enriched in the nuclear env…
Wa8730a010g002840	1.05635	3.77876e-113	5.26835e-109	0.276	0.014
Wa8730a003g006850	1.05528	2.48371e-38	3.46279e-34	0.372	0.115	AT1G74410		RING/U-box superfamily protein
Wa8730a019g003490	1.05185	2.50832e-115	3.4971e-111	0.738	0.173	AT4G01900	GLB1, PII	encodes a PII protein that may function as part of a signal transduction network involved in perceiving the status of carbon and organic nitrogen. Forms a protein complex with N-acetylglutamate kinase and regulates the kinase activity by relieving the feedback inhibition of the kinase by arginine. Regulates acetyl-CoA carboxylase activity.
Wa8730a002g005090	1.0512	1.87478e-53	2.61382e-49	0.104	0.003
Wa8730a007g000880	1.05094	2.75028e-49	3.83444e-45	0.718	0.315	AT3G53190 AT3G01270 AT3G27400 AT4G24780 AT1G67750 AT5G04310 AT5G63180 AT3G24670 AT5G48900 AT4G13710 AT1G04680		Pectin lyase-like superfamily protein Pectate lyase family protein Encodes a pectate lyase involved in response to nematodes. Encodes a pectate lyase involved in response to nematodes. Pectate lyase family protein Pectin lyase-like superfamily protein Pectin lyase-like superfamily protein Pectin lyase-like superfamily protein Pectin lyase-like superfamily protein Pectin lyase-like superfamily pro…
Wa8730a005g005630	1.04826	6.70347e-124	9.34598e-120	0.513	0.069	AT4G20430 AT5G45650		Subtilase family protein subtilase family protein
Wa8730a017g002260	1.0462	4.20024e-66	5.85597e-62	0.251	0.03
Wa8730a010g003570	1.04398	6.75318e-77	9.41529e-73	0.856	0.348	AT1G13390 AT1G68490 AT3G02555
Wa8730a013g002080	1.04268	4.44828e-104	6.20179e-100	0.699	0.169	AT4G11820	FKP1, HMGS, MVA1	Encodes a protein with hydroxymethylglutaryl-CoA synthase activity which was characterized by phenotypical complementation of the S. cerevisiae mutant.
Wa8730a004g003130	1.04223	5.14942e-54	7.17933e-50	0.735	0.302	AT3G24540	AtPERK3, PERK3	Encodes a member of the proline-rich extensin-like receptor kinase (PERK) family. This family consists of 15 predicted receptor kinases (PMID: 15653807).
Wa8730a015g002060	1.03723	7.24789e-80	1.0105e-75	0.668	0.201	AT2G24270	ALDH11A3	Encodes a protein with non-phosphorylating NADP-dependent glyceraldehyde-3-phosphate dehydrogenase activity. The activity of the enzyme was determined from leaf extracts the enzyme has not been purified to confirm activity.
Wa8730a015g003690	1.03576	2.57542e-114	3.59065e-110	0.668	0.126	AT3G07680	p24beta2	Encodes an Golgi-localized p24 protein. Interacts with p24delta5 at ER export sites for ER exit and coupled transport to the Golgi apparatus. The mRNA is cell-to-cell mobile.
Wa8730a011g000310	1.03184	3.49024e-128	4.8661e-124	0.614	0.104	AT2G35740 AT3G03090 AT5G17010	ATINT3, INT3 AtVGT1, VGT1	nositol transporter 3 Encodes a vacuolar membrane-localized glucose transporter that can also transport fructose. Mutations in these gene have effects on seed germination and time to flowering. Major facilitator superfamily protein
Wa8730a014g005700	1.02686	1.17252e-24	1.63473e-20	0.721	0.47	AT4G36040 AT2G17880	DJC23, J11 DJC24	Chaperone DnaJ-domain superfamily protein Chaperone DnaJ-domain superfamily protein
Wa8730a013g006060	1.0241	7.90848e-123	1.1026e-118	0.665	0.129	AT2G28450 AT3G09760		zinc finger (CCCH-type) family protein RING/U-box superfamily protein
Wa8730a006g006710	1.0232	1.09037e-53	1.5202e-49	0.448	0.126	AT1G12880 AT2G01670 AT1G14860 AT1G73540 AT1G18300	NUDT12, atnudt12 NUDT17, atnudt17 NUDT18, atnudt18 NUDT21, atnudt21 NUDT4, atnudt4	nudix hydrolase homolog 12 nudix hydrolase homolog 17 nudix hydrolase homolog 18 nudix hydrolase homolog 21 nudix hydrolase homolog 4
Wa8730a011g000730	1.02136	2.14235e-89	2.98686e-85	0.606	0.147	AT4G19120 AT1G31850	ERD3	S-adenosyl-L-methionine-dependent methyltransferases superfamily protein S-adenosyl-L-methionine-dependent methyltransferases superfamily protein
Wa8730a004g008850	1.01659	7.80385e-66	1.08801e-61	0.746	0.279	AT2G25490 AT5G25350 AT3G15770 AT1G15350 AT4G32342	EBF1, FBL6 EBF2	Encodes an F-box protein involved in the ubiquitin/proteasome-dependent proteolysis of EIN3. Arabidopsis thaliana EIN3-binding F-box protein 2 (EBF2) mRNA. Part of the SCF complex, it is located in the nucleus and is involved in the ethylene-response pathway.
Wa8730a012g000110	1.01494	2.83749e-50	3.95602e-46	0.175	0.019	AT5G22740 AT2G35650	ATCSLA02, ATCSLA2, CSLA02, CSLA2 ATCSLA07, ATCSLA7, CSLA07, CSLA7	encodes a beta-mannan synthase based on in vitro enzyme assays from heterologously expressed protein a member of Glycosyltransferase- Family 2 and encodes a beta-mannan synthase based on in vitro enzyme assays from heterologously expressed protein. Mutants exhibit defects in pollen tube growth and embryo development. The defective embryonic development was associated with reduced proliferation an…
Wa8730a003g002060	1.00456	4.99976e-65	6.97067e-61	0.738	0.282	AT5G67420 AT3G49940 AT4G37540	ASL39, LBD37 LBD38 LBD39	Encodes a LOB-domain protein involved in nitrogen metabolism and affecting leaf morphogenesis. LOB domain-containing protein 38 LOB domain-containing protein 39
Wa8730a011g000990	1.00258	3.59333e-61	5.00982e-57	0.82	0.357	AT4G18780 AT5G16910 AT3G03050 AT1G32180	ATCESA8, CESA8, IRX1, LEW2 ATCSLD2, CSLD2 ATCSLD3, CSLD3, KJK, RHD7 ATCSLD6, CSLD6	Encodes a member of the cellulose synthase family involved in secondary cell wall biosynthesis. Mutants have abnormal xylem formation, reduced cellulose content, and enhanced drought and osmotic stress tolerance. Mediates resistance towards bacterial pathogens via ABA. Confers resistance towards bacterial and fungal pathogens, independent of salicylic acid, ethylene and jasmonate signaling. encod…

## Sheet: Dusk C4 DEGs
Dataset S4. Differentially Expressed Genes for Dusk Cluster 4
Genes showing significant differential expression (log2FC>1 & p_val_adj <0.05 & PCT1 > 10%) in the given cluster versus all other cells in the dataset
PCT1: Percentage of cells within the cluster expressing the gene
PCT2: Percentage of cells outside the cluster expressing the gene
Gene	Ave. Log2 FC	p Value	p Value Adj.	PCT1	PCT2	Arabidopsis orthologues	Arabidopsis gene names	Arabidopsis gene description
Wa8730a006g003250	2.75399	6.16403e-31	8.59389e-27	0.309	0.109	AT2G43590		Chitinase family protein
Wa8730a001g000910	2.48124	1.389e-60	1.93654e-56	0.616	0.261
Wa8730a003g005730	2.44856	1.16503e-37	1.62429e-33	0.307	0.089	AT3G46860 AT5G43570		Predicted to encode a PR (pathogenesis-related) peptide that belongs to the PR-6 proteinase inhibitor family. Six putative PR-6-type protein encoding genes are found in Arabidopsis: At2g38900, At2g38870, At5g43570, At5g43580, At3g50020 and At3g46860. Predicted to encode a PR (pathogenesis-related) peptide that belongs to the PR-6 proteinase inhibitor family. Six putative PR-6-type protein encodin…
Wa8730a003g005740	2.33163	2.51067e-42	3.50038e-38	0.318	0.087	AT3G46860 AT5G43570		Predicted to encode a PR (pathogenesis-related) peptide that belongs to the PR-6 proteinase inhibitor family. Six putative PR-6-type protein encoding genes are found in Arabidopsis: At2g38900, At2g38870, At5g43570, At5g43580, At3g50020 and At3g46860. Predicted to encode a PR (pathogenesis-related) peptide that belongs to the PR-6 proteinase inhibitor family. Six putative PR-6-type protein encodin…
Wa8730a010g004450	2.16767	1.32735e-39	1.85059e-35	0.418	0.159
Wa8730a009g002950	2.07222	6.18559e-34	8.62395e-30	0.444	0.202	AT2G38870		Predicted to encode a PR (pathogenesis-related) peptide that belongs to the PR-6 proteinase inhibitor family. Six putative PR-6-type protein encoding genes are found in Arabidopsis: At2g38900, At2g38870, At5g43570, At5g43580, At3g50020 and At3g46860.
Wa8730a004g002910	2.03759	4.10365e-71	5.72131e-67	0.496	0.136	AT5G42180 AT4G25980 AT4G30170 AT4G17690 AT4G36430 AT5G19880 AT4G11290	PER64	Peroxidase superfamily protein Peroxidase superfamily protein Peroxidase family protein Peroxidase superfamily protein Peroxidase superfamily protein Peroxidase superfamily protein Peroxidase superfamily protein
Wa8730a014g006640	2.02121	1.52679e-23	2.12865e-19	0.175	0.044
Wa8730a015g001560	1.84622	9.1579e-58	1.27679e-53	0.645	0.3	AT5G48540		receptor-like protein kinase-related family protein
Wa8730a019g000680	1.84179	1.84624e-62	2.57403e-58	0.625	0.261	AT5G59820 AT2G37430 AT3G46090 AT2G28710 AT1G02030 AT5G03510 AT3G53600	AtZAT12, RHL41, ZAT12 ZAT11 ZAT7	Encodes a zinc finger protein involved in high light and cold acclimation. Overexpression of this putative transcription factor increases the expression level of 9 cold-responsive genes and represses the expression level of 15 cold-responsive genes, including CBF genes. Also, lines overexpressing this gene exhibits a small but reproducible increase in freeze tolerance. Because of the repression o…
Wa8730a019g002370	1.67686	6.09707e-17	8.50054e-13	0.536	0.404	AT4G15610 AT3G06390		Uncharacterised protein family (UPF0497) Uncharacterised protein family (UPF0497)
Wa8730a019g002340	1.60819	6.19979e-14	8.64375e-10	0.358	0.227	AT4G15610 AT3G06390		Uncharacterised protein family (UPF0497) Uncharacterised protein family (UPF0497)
Wa8730a006g000980	1.58255	1.47162e-37	2.05173e-33	0.499	0.231	AT3G22120 AT4G15160 AT1G62500	CWLP	cell wall-plasma membrane linker protein homolog (CWLP) Bifunctional inhibitor/lipid-transfer protein/seed storage 2S albumin superfamily protein Bifunctional inhibitor/lipid-transfer protein/seed storage 2S albumin superfamily protein
Wa8730a007g006300	1.57949	5.07656e-48	7.07774e-44	0.327	0.081	AT2G18193 AT3G50940 AT3G28580		P-loop containing nucleoside triphosphate hydrolases superfamily protein P-loop containing nucleoside triphosphate hydrolases superfamily protein P-loop containing nucleoside triphosphate hydrolases superfamily protein
Wa8730a019g000660	1.49267	3.14159e-38	4.38e-34	0.347	0.11	AT5G59820 AT2G37430 AT2G28710 AT1G02030 AT5G03510 AT3G46070 AT3G53600	AtZAT12, RHL41, ZAT12 ZAT11	Encodes a zinc finger protein involved in high light and cold acclimation. Overexpression of this putative transcription factor increases the expression level of 9 cold-responsive genes and represses the expression level of 15 cold-responsive genes, including CBF genes. Also, lines overexpressing this gene exhibits a small but reproducible increase in freeze tolerance. Because of the repression o…
Wa8730a006g001210	1.46322	1.29712e-31	1.80845e-27	0.335	0.118	AT2G32210 AT3G22240
Wa8730a002g001010	1.41014	6.52158e-32	9.09238e-28	0.433	0.189	AT1G01570		Protein of unknown function (DUF604)
Wa8730a005g003350	1.3497	2.63491e-37	3.67359e-33	0.696	0.488	AT1G52245 AT3G16120	NA	NA Dynein light chain type 1 family protein
Wa8730a006g001290	1.34535	5.8317e-15	8.13055e-11	0.344	0.19	AT2G32210 AT3G22240
Wa8730a010g006490	1.32158	3.74084e-43	5.21548e-39	0.831	0.686	AT4G28050 AT2G23810 AT4G30430	TET7 TET8 TET9	Member of TETRASPANIN family Member of TETRASPANIN family Member of TETRASPANIN family
Wa8730a009g002980	1.30955	3.9637e-24	5.5262e-20	0.115	0.019	AT2G38870		Predicted to encode a PR (pathogenesis-related) peptide that belongs to the PR-6 proteinase inhibitor family. Six putative PR-6-type protein encoding genes are found in Arabidopsis: At2g38900, At2g38870, At5g43570, At5g43580, At3g50020 and At3g46860.
Wa8730a005g005110	1.28494	1.68836e-31	2.35391e-27	0.321	0.107	AT5G42830		HXXXD-type acyl-transferase family protein
Wa8730a019g000760	1.26837	2.45613e-36	3.42434e-32	0.43	0.168	AT5G03540 AT3G55150 AT2G39380 AT3G09520 AT1G07725 AT5G59730 AT2G28650	ATEXO70A1, EXO70A1 ATEXO70H1, EXO70H1 ATEXO70H2, EXO70H2 ATEXO70H4, EXO70H4 ATEXO70H6, EXO70H6 ATEXO70H7, EXO70H7 ATEXO70H8, EXO70H8	AtEXO70A1 is a member of EXO70 gene family, putative exocyst subunits, conserved in land plants. Arabidopsis thaliana contains 23 putative EXO70 genes, which can be classified into nine clusters on the phylogenetic tree A member of EXO70 gene family, putative exocyst subunits, conserved in land plants. Arabidopsis thaliana contains 23 putative EXO70 genes, which can be classified into eight clust…
Wa8730a015g001570	1.25202	4.32428e-09	6.02891e-05	0.453	0.349	AT5G48540		receptor-like protein kinase-related family protein
Wa8730a002g003800	1.2316	1.24644e-08	0.000173779	0.12	0.048	AT4G35160 AT5G37170 AT1G77530		Encodes a cytosolic N-acetylserotonin O-methyltransferase that can convert N-acetylserotonin to melatonin and serotonin to 5-methoxytryptamine in the process of melatonin synthesis. It does not have caffeic acid O- methyltransferase activity. O-methyltransferase family protein O-methyltransferase family protein
Wa8730a005g008430	1.22522	4.19747e-47	5.85211e-43	0.799	0.572	AT1G67090 AT5G38430	RBCS1A RBCS1B	Encodes a member of the Rubisco small subunit (RBCS) multigene family: RBCS1A (At1g67090), RBCS1B (At5g38430), RBCS2B (At5g38420), and RBCS3B (At5g38410). Functions to yield sufficient Rubisco content for leaf photosynthetic capacity. Encodes a member of the Rubisco small subunit (RBCS) multigene family: RBCS1A (At1g67090), RBCS1B (At5g38430), RBCS2B (At5g38420), and RBCS3B (At5g38410).
Wa8730a015g004680	1.22106	8.82296e-34	1.2301e-29	0.602	0.34	AT3G28340 AT1G13250 AT1G24170 AT1G70090	GATL10, GolS8 GATL3 GATL8, LGT9 GATL9, LGT8	Encodes a protein with putative galacturonosyltransferase activity. Encodes a protein with putative galacturonosyltransferase activity. Encodes a protein with putative galacturonosyltransferase activity. Encodes a protein with putative galacturonosyltransferase activity.
Wa8730a006g001110	1.20987	1.45901e-30	2.03415e-26	0.255	0.072	AT4G15160 AT1G62500 AT3G22142		Bifunctional inhibitor/lipid-transfer protein/seed storage 2S albumin superfamily protein Bifunctional inhibitor/lipid-transfer protein/seed storage 2S albumin superfamily protein Encodes a Protease inhibitor/seed storage/LTP family protein
Wa8730a002g004460	1.19788	2.08409e-45	2.90564e-41	0.742	0.435	AT4G38580 AT1G71050 AT4G35060 AT5G66110	ATFP6, FP6, HIPP26 HIPP20 HIPP25 HIPP27	putative farnesylated protein (At4g38580) mRNA, complete Heavy metal transport/detoxification superfamily protein Heavy metal transport/detoxification superfamily protein Heavy metal transport/detoxification superfamily protein
Wa8730a016g001550	1.19779	8.66419e-21	1.20796e-16	0.507	0.329	AT1G35140 AT5G64260 AT5G09440 AT4G08950	EXL1, PHI-1 EXL2 EXL4 EXO	At1g35140 (At1g35140/T32G9_32) mRNA, complete cds EXORDIUM like 2 EXORDIUM like 4 Phosphate-responsive 1 family protein
Wa8730a012g001430	1.19291	6.00168e-31	8.36754e-27	0.209	0.048	AT5G63450 AT3G48520 AT1G34540 AT5G08250	CYP94B1 CYP94B3 CYP94D1	member of CYP94B member of CYP94B member of CYP94D Cytochrome P450 superfamily protein
Wa8730a015g000860	1.18663	4.86363e-36	6.78087e-32	0.668	0.375	AT5G48070 AT2G18800 AT4G30270 AT4G25810 AT5G57550	ATXTH20, XTH20 ATXTH21, XTH21 MERI-5, MERI5B, SEN4, XTH24 XTH23, XTR6 XTH25, XTR3	putative xyloglucan endotransglycosylase/hydrolase, expressed primarily in the stele of mature non-elongating regions of both the main and the lateral root. Is expressed in lateral root primordia but expression ceases after lateral root begins to grow. xyloglucan endotransglucosylase/hydrolase 21 encodes a protein similar to endo xyloglucan transferase in sequence. It is also very similar to BRU1…
Wa8730a002g003970	1.1864	1.88859e-26	2.63307e-22	0.321	0.123	AT5G37690 AT5G41890 AT1G20132 AT1G75880		SGNH hydrolase-type esterase superfamily protein GDSL-motif esterase/acyltransferase/lipase. Enzyme group with broad substrate specificity that may catalyze acyltransfer or hydrolase reactions with lipid and non-lipid substrates. GDSL-motif esterase/acyltransferase/lipase. Enzyme group with broad substrate specificity that may catalyze acyltransfer or hydrolase reactions with lipid and non-lipid …
Wa8730a006g001280	1.16683	1.80222e-16	2.51266e-12	0.33	0.168	AT2G32210 AT3G22240
Wa8730a008g004500	1.1619	1.95016e-11	2.71891e-07	0.12	0.04	AT2G32300 AT1G22480	UCC1	Encodes a uclacyanin, a protein precursor that is closely related to precursors of stellacyanins and a blue copper protein from pea pods. Cupredoxin superfamily protein
Wa8730a001g010390	1.1443	2.1501e-23	2.99767e-19	0.307	0.123
Wa8730a002g003450	1.13285	3.22798e-22	4.50045e-18	0.521	0.322	AT2G35710 AT4G16600	PGSIP7 PGSIP8	Nucleotide-diphospho-sugar transferases superfamily protein Nucleotide-diphospho-sugar transferases superfamily protein
Wa8730a005g007240	1.12585	1.03728e-56	1.44618e-52	0.911	0.737	AT1G67090 AT5G38430	RBCS1A RBCS1B	Encodes a member of the Rubisco small subunit (RBCS) multigene family: RBCS1A (At1g67090), RBCS1B (At5g38430), RBCS2B (At5g38420), and RBCS3B (At5g38410). Functions to yield sufficient Rubisco content for leaf photosynthetic capacity. Encodes a member of the Rubisco small subunit (RBCS) multigene family: RBCS1A (At1g67090), RBCS1B (At5g38430), RBCS2B (At5g38420), and RBCS3B (At5g38410).
Wa8730a013g001840	1.11834	1.57061e-20	2.18975e-16	0.307	0.132	AT2G46620		P-loop containing nucleoside triphosphate hydrolases superfamily protein
Wa8730a005g007230	1.1095	5.30682e-41	7.39877e-37	0.771	0.545	AT1G67090 AT5G38420	RBCS1A RBCS2B	Encodes a member of the Rubisco small subunit (RBCS) multigene family: RBCS1A (At1g67090), RBCS1B (At5g38430), RBCS2B (At5g38420), and RBCS3B (At5g38410). Functions to yield sufficient Rubisco content for leaf photosynthetic capacity. Encodes a member of the Rubisco small subunit (RBCS) multigene family: RBCS1A (At1g67090), RBCS1B (At5g38430), RBCS2B (At5g38420), and RBCS3B (At5g38410).
Wa8730a013g004860	1.0845	6.20482e-43	8.65076e-39	0.845	0.674
Wa8730a001g005110	1.08041	4.70858e-25	6.5647e-21	0.521	0.3	AT2G33480 AT3G15170 AT3G29035 AT5G18270 AT5G39610 AT3G04060 AT3G12977	ANAC041, NAC041 ANAC054, ATNAC1, CUC1 ANAC059, ATNAC3, NAC3, ORS1 ANAC087 ANAC092, ATNAC2, ATNAC6, NAC2, NAC6, ORE1 NAC046, anac046	NAC domain containing protein 41 Encodes a transcription factor involved in shoot apical meristem formation and auxin-mediated lateral root formation. The gene is thought not to be involved in stress responses (NaCl, auxins, ethylene). <i>Cuc</i> mutant was first recognized at the heart stage, where embryos lacking two distinct bulges of cotyledonary primordia were observed. Encodes a protein wit…
Wa8730a003g001710	1.0789	2.38023e-24	3.31852e-20	0.378	0.173	AT3G18830 AT4G36670 AT2G16120 AT2G20780 AT2G18480 AT1G19450	ATPLT5, ATPMT5, PMT5 AtPLT6, AtPMT6, PLT6, PMT6 ATPMT1, PMT1	This gene encodes a plasma membrane-localized polyol/cyclitol/monosaccharide-H+-symporter. The symporter is able to catalyze the energy-dependent membrane passage of a wide range of linear polyols (three to six carbon backbone), of cyclic polyols (<i>myo</i>-inositol), and of numerous monosaccharides, including pyranose ring-forming and furanose ring-forming hexoses and pentoses. This gene belong…
Wa8730a001g011310	1.07779	5.10463e-28	7.11687e-24	0.415	0.18	AT5G02500 AT3G12580 AT3G09440	AT-HSC70-1, AtHsp70-1, HSC70, HSC70-1, HSP70-1 ATHSP70, HSP70	encodes a member of heat shock protein 70 family. heat shock protein 70 Heat shock protein 70 (Hsp 70) family protein
Wa8730a005g003750	1.07333	5.05793e-12	7.05177e-08	0.352	0.219	AT3G25780	AOC3	Encodes allene oxide cyclase, one of the enzymes involved in jasmonic acid biosynthesis. One of four genes in Arabidopsis that encode this enzyme. mRNA expression is upregulated in senescing leaves. Note: Nomenclature for Arabidopsis allene oxide cyclase 3 (AOC3, AT3G25780) gene is based on Stenzel et al. 2003 Plant Molecular Biology 51:895-911. AOC3 (AT3G25780) is also referred to as AOC2 in He …
Wa8730a005g001780	1.06143	9.89855e-27	1.38006e-22	0.143	0.027	AT1G14540 AT1G71695 AT1G68850 AT5G19890 AT4G25980 AT1G44970 AT4G36430 AT1G49570	PER4	Peroxidase superfamily protein Peroxidase superfamily protein Peroxidase superfamily protein Peroxidase superfamily protein Peroxidase superfamily protein Peroxidase superfamily protein Peroxidase superfamily protein Peroxidase superfamily protein
Wa8730a001g010360	1.06022	4.19469e-21	5.84823e-17	0.332	0.148
Wa8730a007g006500	1.05936	4.33951e-16	6.05015e-12	0.404	0.241
Wa8730a016g003310	1.05672	9.54414e-29	1.33064e-24	0.364	0.14	AT3G14310 AT4G33220 AT1G11580 AT4G02330 AT1G23200 AT5G20860 AT3G60730 AT1G02810 AT4G15980	ATPME3, OZS2, PME3 ATPME44, PME44 ATPMEPCRA, PMEPCRA ATPMEPCRB, AtPME41, PME41	encodes a pectin methylesterase, targeted by a cellulose binding protein (CBP) from the parasitic nematode Heterodera schachtii during parasitism. pectin methylesterase 44 methylesterase PCR A Encodes a pectin methylesterase that is sensitive to chilling stress and brassinosteroid regulation. Encodes a pectin methyl esterase involved in embryo development. Plant invertase/pectin methylesterase in…
Wa8730a005g001590	1.05437	6.054e-25	8.44049e-21	0.304	0.113	AT5G12020 AT5G51440	HSP17.6II	17.6 kDa class II heat shock protein HSP20-like chaperones superfamily protein
Wa8730a011g005910	1.05201	1.71447e-20	2.39032e-16	0.539	0.355	AT5G57123 AT4G29905 AT5G10695
Wa8730a016g004010	1.0517	8.82732e-19	1.2307e-14	0.278	0.118
Wa8730a008g002350	1.05044	1.70255e-15	2.3737e-11	0.344	0.185	AT5G11540	AtGulLO3, GulLO3	Encodes a homolog of rat L-gulono-1,4-lactone (L-GulL) oxidase that is involved in the biosynthesis of L-ascorbic acid.
Wa8730a010g004440	1.04483	3.71486e-10	5.17925e-06	0.235	0.122
Wa8730a001g007370	1.04133	6.84964e-33	9.54977e-29	0.656	0.396	AT4G31550 AT2G24570	ATWRKY11, WRKY11 ATWRKY17, WRKY17	member of WRKY Transcription Factor Group II-d negative regulator of basal resistance to Pseudomonas syringae. member of WRKY Transcription Factor Group II-d negative regulator of basal resistance to Pseudomonas syringae.
Wa8730a001g012130	1.02583	1.98281e-20	2.76443e-16	0.665	0.463	AT3G54040		PAR1 protein
Wa8730a014g001210	1.01111	4.17614e-19	5.82238e-15	0.37	0.184	AT2G03450 AT1G13900	ATPAP9, PAP9 PAP2	purple acid phosphatase 9 Encodes a dual-localized acid phosphatase (mitochondria and chloroplast) that modulates carbon metabolism.
Wa8730a001g001130	1.00954	7.32464e-07	0.010212	0.335	0.249	AT3G57270 AT4G31140	BG1	encodes a member of glycosyl hydrolase family 17 O-Glycosyl hydrolases family 17 protein
Wa8730a001g002190	1.00785	2.91312e-07	0.00406147	0.295	0.2	AT5G19120 AT1G03220		Eukaryotic aspartyl protease family protein Eukaryotic aspartyl protease family protein

## Sheet: Dusk C5 DEGs
Dataset S4. Differentially Expressed Genes for Dusk Cluster 5
Genes showing significant differential expression (log2FC>1 & p_val_adj <0.05 & PCT1 > 10%) in the given cluster versus all other cells in the dataset
PCT1: Percentage of cells within the cluster expressing the gene
PCT2: Percentage of cells outside the cluster expressing the gene
Gene	Ave. Log2 FC	p Value	p Value Adj.	PCT1	PCT2	Arabidopsis orthologues	Arabidopsis gene names	Arabidopsis gene description
Wa8730a010g004750	4.63974	1.32626e-279	1.84907e-275	0.719	0.053	AT4G09600 AT1G10588	GASA3	One of GASA gene family which is related to a GA-stimulated transcript (GAST) from tomato. Encodes a Gibberellin-regulated GASA/GAST/Snakin family protein
Wa8730a010g002220	3.81651	1.43861e-191	2.00571e-187	0.79	0.145	AT5G53880
Wa8730a010g004730	3.5307	2.69085e-249	3.75159e-245	0.668	0.052	AT4G09600 AT1G10588	GASA3	One of GASA gene family which is related to a GA-stimulated transcript (GAST) from tomato. Encodes a Gibberellin-regulated GASA/GAST/Snakin family protein
Wa8730a005g003250	2.55465	1.42566e-173	1.98766e-169	0.852	0.206	AT1G73190 AT3G16240 AT4G01470 AT2G36830 AT2G25810 AT1G52180	ALPHA-TIP, TIP3 1 AQP1, ATTIP2 1, DELTA-TIP, DELTA-TIP1, TIP2 1 ATTIP1.3, GAMMA-TIP3, TIP1 3 GAMMA-TIP, GAMMA-TIP1, TIP1 1 TIP4 1	Moves to the Protein Storage Vacuole in a Golgi independent manner Delta tonoplast intrinsic protein, functions as a water channel and ammonium (NH3) transporter. Highly expressed in flower, shoot, and stem. Expression shows diurnal regulation and is induced by ammonium (NH3). Protein localized to vacuolar membrane. Encodes AtTIP1 3, functions as water and urea channels in pollen. Encodes a tonop…
Wa8730a010g004740	2.53488	1.01104e-225	1.40959e-221	0.426	0.009	AT4G09600 AT1G10588	GASA3	One of GASA gene family which is related to a GA-stimulated transcript (GAST) from tomato. Encodes a Gibberellin-regulated GASA/GAST/Snakin family protein
Wa8730a005g003170	2.29752	1.23618e-147	1.72349e-143	1	0.96	AT1G73190 AT3G16240 AT4G01470 AT2G36830 AT2G25810 AT1G52180	ALPHA-TIP, TIP3 1 AQP1, ATTIP2 1, DELTA-TIP, DELTA-TIP1, TIP2 1 ATTIP1.3, GAMMA-TIP3, TIP1 3 GAMMA-TIP, GAMMA-TIP1, TIP1 1 TIP4 1	Moves to the Protein Storage Vacuole in a Golgi independent manner Delta tonoplast intrinsic protein, functions as a water channel and ammonium (NH3) transporter. Highly expressed in flower, shoot, and stem. Expression shows diurnal regulation and is induced by ammonium (NH3). Protein localized to vacuolar membrane. Encodes AtTIP1 3, functions as water and urea channels in pollen. Encodes a tonop…
Wa8730a014g000600	2.15619	1.52374e-90	2.1244e-86	0.761	0.304
Wa8730a006g001200	2.1411	1.19888e-134	1.67148e-130	0.674	0.134	AT3G22120 AT4G15160 AT1G62500	CWLP	cell wall-plasma membrane linker protein homolog (CWLP) Bifunctional inhibitor/lipid-transfer protein/seed storage 2S albumin superfamily protein Bifunctional inhibitor/lipid-transfer protein/seed storage 2S albumin superfamily protein
Wa8730a013g005950	2.04634	1.88724e-107	2.63119e-103	0.803	0.308	AT3G53420 AT1G01620 AT4G00430 AT2G37170 AT3G54820	AtPIP2 1, PIP2, PIP2 1, PIP2A PIP1 3, PIP1C, TMP-B PIP1 4, PIP1E, TMP-C PIP2 2, PIP2B PIP2 5, PIP2D	a member of the plasma membrane intrinsic protein subfamily PIP2. localizes to the plasma membrane and exhibits water transport activity in Xenopus oocyte. expressed specifically in the vascular bundles and protein level increases slightly during leaf dev. When expressed in yeast cells can conduct hydrogen peroxide into those cells. a member of the plasma membrane intrinsic protein subfamily PIP1…
Wa8730a009g000730	2.03844	1.30383e-87	1.8178e-83	0.826	0.432	AT3G46010 AT5G59890 AT4G00680	ADF1, ATADF1, atadf ADF4, ATADF4 ADF8	Actin-depolymerizing factor (ADF) and cofilin define a family of actin-binding proteins essential for the rapid turnover of filamentous actin in vivo. actin depolymerizing factor 4 (ADF4) mRNA, complete cds actin depolymerizing factor 8
Wa8730a017g003860	2.01484	8.58762e-92	1.19729e-87	0.858	0.463	AT1G29930 AT5G54270	AB140, CAB1, CAB140, LHCB1.3 LHCB3, LHCB3*1	Subunit of light-harvesting complex II (LHCII),which absorbs light and transfers energy to the photosynthetic reaction center. Lhcb3 protein is a component of the main light harvesting chlorophyll a/b-protein complex of Photosystem II (LHC II).
Wa8730a015g000860	1.94825	3.03021e-88	4.22472e-84	0.823	0.362	AT5G48070 AT2G18800 AT4G30270 AT4G25810 AT5G57550	ATXTH20, XTH20 ATXTH21, XTH21 MERI-5, MERI5B, SEN4, XTH24 XTH23, XTR6 XTH25, XTR3	putative xyloglucan endotransglycosylase/hydrolase, expressed primarily in the stele of mature non-elongating regions of both the main and the lateral root. Is expressed in lateral root primordia but expression ceases after lateral root begins to grow. xyloglucan endotransglucosylase/hydrolase 21 encodes a protein similar to endo xyloglucan transferase in sequence. It is also very similar to BRU1…
Wa8730a004g001700	1.8969	3.85978e-82	5.3813e-78	0.887	0.522	AT5G60490 AT5G44130 AT2G20520	AtFLA12, FLA12 FLA13 FLA6	Encodes a member of fasciclin-like arabinogalactan proteins (FLAs) containing a cell adhesion fasciclin (FAS) domain. Mutations result in altered stem biomechanics with reduced tensile strength and reduced tensile modulus of elasticity, as well as altered cell wall architecture and composition, with increased cellulose microfibril angle, reduced arabinose, galactose and cellulose content. FASCICL…
Wa8730a001g012480	1.89385	3.23187e-125	4.50587e-121	1	0.908	AT2G45960 AT3G53420 AT2G37180 AT5G60660 AT2G39010 AT4G35100	ATHH2, PIP1 2, PIP1B, TMP-A AtPIP2 1, PIP2, PIP2 1, PIP2A PIP2 3, PIP2C, RD28 PIP2 4, PIP2F PIP2 6, PIP2E PIP2 7, PIP3, PIP3A, SIMIP	a member of the plasma membrane intrinsic protein subfamily PIP1. localizes to the plasma membrane and exhibits water transport activity in Xenopus oocyte. expressed ubiquitously and protein level decreases slightly during leaf development. a member of the plasma membrane intrinsic protein subfamily PIP2. localizes to the plasma membrane and exhibits water transport activity in Xenopus oocyte. ex…
Wa8730a009g005910	1.79425	2.59399e-106	3.61653e-102	0.974	0.737	AT5G54270	LHCB3, LHCB3*1	Lhcb3 protein is a component of the main light harvesting chlorophyll a/b-protein complex of Photosystem II (LHC II).
Wa8730a003g000890	1.77053	2.08161e-73	2.90218e-69	0.532	0.142	AT2G14580 AT3G19690 AT4G33720 AT1G50060 AT5G57625 AT4G31470 AT4G30320	ATPRB1, PRB1	pathogenesis related protein, encodes a basic PR1-like protein. Expresses in flowers, roots, and not in leaves and responses to ethylene and methyl jasmonate. Salicylic acid represses gene expression. CAP (Cysteine-rich secretory proteins, Antigen 5, and Pathogenesis-related 1 protein) superfamily protein CAP (Cysteine-rich secretory proteins, Antigen 5, and Pathogenesis-related 1 protein) superf…
Wa8730a013g004500	1.67864	1.24867e-62	1.7409e-58	0.645	0.269	AT5G62700 AT5G44340 AT5G23860	TUB3 TUB4 TUB8	encodes tubulin beta-2/beta-3 chain beta tubulin gene beta-tubulin, preferentially expressed in endodermal and phloem cells of primary roots and in the vascular tissues of leaves, stems, and flowers.
Wa8730a018g000770	1.67747	3.71022e-150	5.17279e-146	0.439	0.034	AT2G37330	ALS3	Encodes an ABC transporter-like protein, without an ATPase domain, required for aluminum (Al) resistance/tolerance and may function to redistribute accumulated Al away from sensitive tissues in order to protect the growing root from the toxic effects of Al.
Wa8730a015g005510	1.65496	3.77304e-98	5.26038e-94	0.342	0.036
Wa8730a009g004140	1.65448	3.83392e-87	5.34525e-83	0.474	0.092	AT5G16730 AT3G05900		Encodes a microtubule-associated protein. The mRNA is cell-to-cell mobile. neurofilament protein-related
Wa8730a006g001380	1.6521	1.08195e-87	1.50846e-83	0.503	0.108
Wa8730a013g004640	1.64158	2.00465e-58	2.79489e-54	0.477	0.139	AT3G09840 AT3G53230 AT5G03340 AT3G54830	ATCDC48, CDC48, CDC48A AtCDC48B AtCDC48C	Encodes a cell division cycle protein, a member of AAA-type ATPases gene family. Expressed throughout the plant in regions of cell division. Within the cell, sub-cellular localization varies depending on the stage of the cell cycle.Mutants in which the expression of CDC48A is altered show defects in cytokinesis, cell expansion and cell differentiation. CDC48 is induced upon oilseed rape mosaic to…
Wa8730a005g004040	1.61732	4.17285e-38	5.81778e-34	0.642	0.322	AT2G46330 AT3G61640 AT5G53250	AGP16, ATAGP16 AGP20, AtAGP20 AGP22, ATAGP22	Encodes arabinogalactan protein (AGP16). arabinogalactan protein 20 arabinogalactan protein 22
Wa8730a017g001190	1.58718	9.22766e-106	1.28652e-101	0.977	0.841
Wa8730a004g004970	1.58701	3.37291e-44	4.7025e-40	0.555	0.244	AT1G29920 AT2G34430 AT1G61520 AT3G27690 AT5G54270	AB165, CAB2, LHCB1.1 LHB1B1, LHCB1.4 LHCA3 LHCB2, LHCB2.3, LHCB2.4 LHCB3, LHCB3*1	Encodes lhcb1.1 a component of the LHCIIb light harvesting complex associated with photosystem II. Photosystem II type I chlorophyll a/b-binding protein PSI type III chlorophyll a/b-binding protein (Lhca3*1) Encodes Lhcb2.4. Belongs to the Lhc super-gene family encodes the light-harvesting chlorophyll a/b-binding (LHC) proteins that constitute the antenna system of the photosynthetic apparatus. L…
Wa8730a008g004210	1.58391	1.32808e-23	1.85161e-19	0.629	0.424	AT4G21960	PRXR1	Encodes AT4g21960 (AT4g21960/T8O5_170).
Wa8730a008g005160	1.58174	3.84913e-71	5.36646e-67	0.523	0.14	AT4G37800 AT1G11545 AT4G03210	XTH7 XTH8 XTH9	xyloglucan endotransglucosylase/hydrolase 7 xyloglucan endotransglucosylase/hydrolase 8 encodes a member of xyloglucan endotransglucosylase/hydrolases (XTHs) that catalyze the cleavage and molecular grafting of xyloglucan chains function in loosening and rearrangement of the cell wall. Gene is expressed in shoot apex region, flower buds, flower stalks and internodes bearing flowers.
Wa8730a016g002350	1.58108	7.49709e-73	1.04524e-68	0.842	0.456	AT1G37130 AT1G77760	ATNR2, B29, CHL3, NIA2, NIA2-1, NR, NR2 GNR1, NIA1, NR1	Identified as a mutant resistant to chlorate. Encodes nitrate reductase structural gene. Involved in nitrate assimilation. Has nitrate reductase activity. Up-regulated by the fungus P. indica. Binds transcription factor At2g35940. Encodes the cytosolic minor isoform of nitrate reductase (NR). Involved in the first step of nitrate assimilation, it contributes about 15% of the nitrate reductase act…
Wa8730a007g000790	1.54019	3.54227e-63	4.93863e-59	0.874	0.618
Wa8730a012g005370	1.5275	7.57059e-69	1.05549e-64	0.845	0.484	AT3G47470	CAB4, LHCA4	Encodes a chlorophyll a/b-binding protein that is more similar to the PSI Cab proteins than the PSII cab proteins. The predicted protein is about 20 amino acids shorter than most known Cab proteins.
Wa8730a006g005790	1.5137	3.08402e-57	4.29974e-53	0.826	0.517	AT1G15820	CP24, LHCB6	Lhcb6 protein (Lhcb6), light harvesting complex of photosystem II.
Wa8730a005g005360	1.50267	9.03024e-89	1.259e-84	0.961	0.757	AT4G20260	ATPCAP1, MDP25, PCAP1	Encodes a Ca2+ and Cu2+ binding protein. N-terminal myristylation on glycine 2 appears to enable it to associate tightly with the plasma membrane. Recombinant PCaP1 interacts strongly with phosphatidylinositol 3,5-bisphosphate (PtdIns(3,5)P2) and PtdIns (3,4,5)P3, and weakly with PtdIns(3,5)P2 and PtdIns(4,5). It also interacts with calmodulin (CaM) in a calcium-dependent manner. CaM does not int…
Wa8730a005g007220	1.42923	1.91912e-47	2.67564e-43	0.597	0.252	AT1G29930 AT3G27690	AB140, CAB1, CAB140, LHCB1.3 LHCB2, LHCB2.3, LHCB2.4	Subunit of light-harvesting complex II (LHCII),which absorbs light and transfers energy to the photosynthetic reaction center. Encodes Lhcb2.4. Belongs to the Lhc super-gene family encodes the light-harvesting chlorophyll a/b-binding (LHC) proteins that constitute the antenna system of the photosynthetic apparatus.
Wa8730a006g002770	1.4148	9.27049e-16	1.29249e-11	0.265	0.111	AT1G22450	ATCOX6B2, COX6B	subunit 6b of cytochrome c oxidase
Wa8730a012g001530	1.40186	2.92522e-43	4.07833e-39	0.539	0.221	AT5G40890 AT3G27170 AT5G49890	ATCLC-A, ATCLCA, CLC-A, CLCA ATCLC-B, CLC-B ATCLC-C, CLC-C	Encodes a member of the voltage-dependent chloride channel. Also functions as a NO3-/H+ exchanger that serves to accumulate nitrate nutrient in vacuoles. Mutants homozygous for the T-DNA insertion mutation have reduced nitrate uptake capacity in high nitrate environment and exhibit hypersensitivity to chlorate. member of Anion channel protein family member of Anion channel protein family
Wa8730a001g006760	1.39757	1.52231e-39	2.12241e-35	0.745	0.442
Wa8730a001g005450	1.394	1.75116e-47	2.44147e-43	0.748	0.487	AT2G33070 AT3G07720	ATNSP2, NSP2	Encodes a nitrile-specifier protein NSP2. NSP2 is one out of five (At3g16400/NSP1, At2g33070/NSP2, At3g16390/NSP3, At3g16410/NSP4 and At5g48180/NSP5) A. thaliana epithiospecifier protein (ESP) homologues that promote simple nitrile, but not epithionitrile or thiocyanate formation. Galactose oxidase/kelch repeat superfamily protein
Wa8730a017g001020	1.38306	1.06806e-71	1.48909e-67	0.535	0.141	AT1G01490		Heavy metal transport/detoxification superfamily protein
Wa8730a007g002830	1.35361	9.56571e-71	1.33365e-66	0.926	0.739
Wa8730a004g005110	1.35103	3.54729e-48	4.94563e-44	0.471	0.162	AT4G05150 AT3G18230 AT5G49920		Octicosapeptide/Phox/Bem1p family protein Octicosapeptide/Phox/Bem1p family protein Octicosapeptide/Phox/Bem1p family protein
Wa8730a009g000670	1.344	2.07674e-73	2.89538e-69	0.958	0.774	AT3G54890 AT3G08940	LHCA1 LHCB4.2	Encodes a component of the light harvesting complex associated with photosystem I. Lhcb4.2 protein (Lhcb4.2, protein involved in the light harvesting complex of photosystem II
Wa8730a001g009440	1.31948	3.2822e-46	4.57605e-42	0.606	0.269
Wa8730a015g000790	1.3112	7.50209e-16	1.04594e-11	0.461	0.278	AT5G48070 AT2G18800 AT4G30270 AT4G25810 AT5G57550	ATXTH20, XTH20 ATXTH21, XTH21 MERI-5, MERI5B, SEN4, XTH24 XTH23, XTR6 XTH25, XTR3	putative xyloglucan endotransglycosylase/hydrolase, expressed primarily in the stele of mature non-elongating regions of both the main and the lateral root. Is expressed in lateral root primordia but expression ceases after lateral root begins to grow. xyloglucan endotransglucosylase/hydrolase 21 encodes a protein similar to endo xyloglucan transferase in sequence. It is also very similar to BRU1…
Wa8730a005g004460	1.29032	1.01259e-58	1.41175e-54	0.587	0.203	AT2G34070 AT1G29050 AT2G42570 AT2G31110 AT3G14850	TBL37 TBL38 TBL39 TBL40 TBL41	Encodes a member of the TBL (TRICHOME BIREFRINGENCE-LIKE) gene family containing a plant-specific DUF231 (domain of unknown function) domain. TBL gene family has 46 members, two of which (TBR/AT5G06700 and TBL3/AT5G01360) have been shown to be involved in the synthesis and deposition of secondary wall cellulose, presumably by influencing the esterification state of pectic polymers. A nomenclature…
Wa8730a003g007760	1.27915	8.32659e-39	1.16089e-34	0.426	0.152	AT5G37680	ARLA1A, ATARLA1A	A member of ARF-like GTPase family. A thaliana has 21 members, in two subfamilies, ARF and ARL GTPases.
Wa8730a006g002040	1.27486	1.48431e-30	2.06942e-26	0.723	0.494	AT3G26650 AT1G13440 AT1G79530 AT1G16300	GAPA, GAPA-1 GAPC-2, GAPC2 GAPCP-1 GAPCP-2	Encodes one of the two subunits forming the photosynthetic glyceraldehyde-3-phosphate dehydrogenase (GAPDH) and as such a constituent of the supramolecular complex with phosphoribulokinase (PRK) thought to be linked by a small peptide encoded by CP12-2. GapA-1 is coordinately expressed by light with PRK and CP12-2. The enzyme activity, tested in leaf protein extracts dropped significantly after e…
Wa8730a006g003100	1.27194	1.42456e-78	1.98612e-74	0.326	0.042	AT1G05000	AtPFA-DSP1, PFA-DSP1	Encodes an atypical dual-speci&#64257 city phosphatase.
Wa8730a012g002730	1.20667	1.46023e-59	2.03585e-55	0.881	0.649	AT3G25070	RIN4	Encodes a member of the R protein complex and may represent a virulence target of type III pili effector proteins (virulence factors) from bacterial pathogens, which is 'guarded' by R protein complex (RPM1 and RPS2 proteins). RIN4 physically interacts with RPS2 and RPM1 in vivo. Bacterial avirulence (Avr) effectors AvrB, AvrRpm1, and AvrRpt2 induce a mobility shift in RIN4 and expression of AvrRp…
Wa8730a001g006790	1.19634	1.89146e-19	2.63707e-15	0.419	0.216
Wa8730a013g002050	1.15014	2.71331e-58	3.78289e-54	0.3	0.05	AT4G22990 AT1G63010 AT4G11810		Encodes a member of the PHOSPHATE TRANSPORTER 5 family (PHT5 3). Overexpression of PHT5:3 leads to Pi sequestration into vacuoles and altered regulation of Pi starvation-responsive genes. Encodes an SPX domain protein that transports Pi into the vacuole and is essential for phosphate homeostasis. Encodes an SPX domain protein that transports Pi into the vacuole. Overexpression of PHT5:2 leads to …
Wa8730a006g002780	1.13946	5.61459e-16	7.82786e-12	0.703	0.589
Wa8730a017g004030	1.13676	9.95034e-48	1.38728e-43	0.313	0.068
Wa8730a010g003680	1.12549	6.8604e-53	9.56476e-49	0.348	0.077	AT3G14770 AT1G66770	AtSWEET2, SWEET2 AtSWEET6, SWEET6	Nodulin MtN3 family protein Nodulin MtN3 family protein
Wa8730a011g000860	1.08237	9.22111e-37	1.28561e-32	0.752	0.484	AT1G78900	VHA-A	Encodes catalytic subunit A of the vacuolar ATP synthase. Mutants are devoid of vacuolar ATPase activity as subunit A is encoded only by this gene and show strong defects in male gametophyte development and in Golgi stack morphology.
Wa8730a007g005080	1.0738	2.67424e-67	3.72842e-63	0.974	0.878	AT4G10340	LHCB5	photosystem II encoding the light-harvesting chlorophyll a/b binding protein CP26 of the antenna system of the photosynthetic apparatus
Wa8730a011g000410	1.04874	8.04253e-28	1.12129e-23	0.684	0.441	AT3G03150 AT5G17165
Wa8730a001g008310	1.04542	6.33759e-43	8.83586e-39	0.842	0.592	AT1G15820	CP24, LHCB6	Lhcb6 protein (Lhcb6), light harvesting complex of photosystem II.
Wa8730a016g001990	1.03387	2.42456e-47	3.38033e-43	0.871	0.631
Wa8730a014g003530	1.03365	6.69903e-38	9.33979e-34	0.826	0.615	AT2G01850 AT1G14720 AT4G13090 AT4G18990 AT1G32170	ATXTH27, EXGT-A3, XTH27 ATXTH28, EXGT-A2, XTH28, XTR2 XTH2 XTH29 XTH30, XTR4	EXGT-A3 has homology to xyloglucan endotransglucosylases/hydrolases (XTHs). Mutants in this gene show a lesion mimic phenotype associated with leaf maturation and a reduction in the number of tertiary veins. Individual tracheary elements in the mutants are shorter, but phloem transport activity is not severely affected. EXGT-A3 plays a role in xyloglucan degradation in the differentiating trachea…
Wa8730a002g001850	1.01699	1.71093e-23	2.38538e-19	0.523	0.294	AT2G21410 AT4G39080	VHA-A2 VHA-A3	Vacuolar proton ATPase subunit VHA-a isoform 2. Localized in the tonoplast. Required for efficient nutrient storage but not for sodium accumulation. Vacuolar proton ATPase subunit VHA-a isoform 3. Localized in the tonoplast.
Wa8730a020g001280	1.01646	2.0694e-37	2.88516e-33	0.455	0.167	AT3G27170	ATCLC-B, CLC-B	member of Anion channel protein family
Wa8730a017g001590	1.00164	1.15675e-19	1.61274e-15	0.319	0.138

## Sheet: Dusk C6 DEGs
Dataset S4. Differentially Expressed Genes for Dusk Cluster 6
Genes showing significant differential expression (log2FC>1 & p_val_adj <0.05 & PCT1 > 10%) in the given cluster versus all other cells in the dataset
PCT1: Percentage of cells within the cluster expressing the gene
PCT2: Percentage of cells outside the cluster expressing the gene
Gene	Ave. Log2 FC	p Value	p Value Adj.	PCT1	PCT2	Arabidopsis orthologues	Arabidopsis gene names	Arabidopsis gene description
Wa8730a007g007160	3.39883	4.76619e-231	6.64502e-227	0.807	0.1	AT1G35660
Wa8730a008g005470	2.98324	2.16157e-108	3.01366e-104	0.963	0.668	AT5G54500 AT4G36750 AT4G27270	FQR1	Encodes a flavin mononucleotide-binding flavodoxin-like quinone reductase that is a primary auxin-response gene. Quinone reductase family protein Quinone reductase family protein
Wa8730a010g001420	2.96316	3.479e-110	4.85042e-106	0.6	0.115
Wa8730a013g001140	2.89678	6.0056e-112	8.37301e-108	0.93	0.506	AT5G47120 AT4G17580	ATBI-1, ATBI1, BI-1, BI1	Encodes BI-1, a homolog of mammalian Bax inhibitor 1. Functions as an attenuator of biotic and abiotic types of cell death. Bax-induced cell death can be downregulated by ectopically expressing AtBI in planta. Bax inhibitor-1 family protein
Wa8730a005g006600	2.84816	5.17989e-90	7.2218e-86	0.826	0.398	AT3G03270 AT5G14680 AT3G58450		HRU1 is a hypoxia induced universal stress protein. It exists as two splice variants with AT3G03270.2 , which contains a putative dimerization domain, the predominant transcript found under anoxia. It is induced by RAP2.12. Subcellular localization is dynamic under anoxia the localization of HRU1 shifts from cytoplasm to the plasma membrane. Adenine nucleotide alpha hydrolases-like superfamily pr…
Wa8730a012g004810	2.84744	9.7295e-133	1.35649e-128	0.937	0.372	AT5G65110	ACX2, ATACX2	Encodes an acyl-CoA oxidase presumably involved in long chain fatty acid biosynthesis.
Wa8730a015g005970	2.73292	3.23519e-95	4.51051e-91	0.752	0.257
Wa8730a007g000980	2.71134	5.12499e-119	7.14525e-115	0.767	0.208	AT3G01770 AT5G14270 AT3G27260 AT5G63320	ATBET10, BET10 ATBET9, BET9 GTE8 NPX1	bromodomain and extraterminal domain protein 10 bromodomain and extraterminal domain protein 9 Kinase like protein with similarity to yeast BDF1 and human RING3 protein, which have two bromodomains GTE8 has a single bromodomain Encodes NPX1 (Nuclear Protein X1), a nuclear factor regulating abscisic acid responses.
Wa8730a011g004200	2.69613	1.31389e-83	1.83183e-79	0.541	0.123
Wa8730a014g001820	2.69534	1.91261e-106	2.66656e-102	0.774	0.241	AT1G74800 AT1G27120		Encodes a Golgi-localized hydroxyproline galactosyltransferase GALT5. Functions together with GALT2 as redundant GALTs that control AGP (arabinogalactan-proteins) O-glycosylation, which is essential for normal growth and development. Mutants display multiple phenotypes including reduced root hair growth. Encodes a Golgi-localized hydroxyproline-O-galactosyltransferase.
Wa8730a015g006070	2.66874	2.7276e-136	3.80282e-132	0.752	0.165
Wa8730a016g003310	2.66008	2.72642e-64	3.80118e-60	0.5	0.134	AT3G14310 AT4G33220 AT1G11580 AT4G02330 AT1G23200 AT5G20860 AT3G60730 AT1G02810 AT4G15980	ATPME3, OZS2, PME3 ATPME44, PME44 ATPMEPCRA, PMEPCRA ATPMEPCRB, AtPME41, PME41	encodes a pectin methylesterase, targeted by a cellulose binding protein (CBP) from the parasitic nematode Heterodera schachtii during parasitism. pectin methylesterase 44 methylesterase PCR A Encodes a pectin methylesterase that is sensitive to chilling stress and brassinosteroid regulation. Encodes a pectin methyl esterase involved in embryo development. Plant invertase/pectin methylesterase in…
Wa8730a020g000110	2.54712	2.35012e-121	3.27654e-117	0.63	0.117	AT1G71960 AT2G36380 AT1G66950	ABCG25, ATABCG25 ABCG34, ATPDR6, PDR6 ABCG39, ATPDR11, PDR11	Encodes a plasma membrane localized ABC transporter involved in abscisic acid transport and responses. pleiotropic drug resistance 6 Encodes a plasma membrane-localized ABC transporter. Confers tolerance to herbicide paraquat.
Wa8730a005g008260	2.53905	9.97885e-101	1.39125e-96	0.807	0.303	AT1G70770 AT1G23170		Protein of unknown function DUF2359, transmembrane Protein of unknown function DUF2359, transmembrane
Wa8730a018g000270	2.47094	1.79406e-124	2.50128e-120	0.822	0.236	AT3G11410 AT1G07430 AT5G59220 AT2G29380	AHG3, ATPP2CA, PP2CA AIP1, AtAIP1, HAI2, HON HAI1, SAG113 HAI3	Encodes protein phosphatase 2C. Negative regulator of ABA signalling. Expressed in seeds during germination. mRNA up-regulated by drought and ABA. Encodes a member of the group A protein phosphatase 2C (PP2C) family that is responsible for negatively regulating seed dormancy. Encodes a member of the PP2C family (Clade A protein phosphatases type 2C). Functions as a negative regulator of osmotic s…
Wa8730a008g005080	2.45599	1.09477e-60	1.52633e-56	0.433	0.104	AT4G21215
Wa8730a008g003990	2.45172	3.3161e-60	4.6233e-56	0.741	0.372	AT2G32240
Wa8730a010g000800	2.41753	3.96729e-146	5.53119e-142	0.674	0.107	AT4G26080 AT5G57050 AT1G72770 AT1G17550	ABI1, AtABI1 ABI2, AtABI2 AtHAB1, HAB1 AtHAB2, HAB2	Involved in abscisic acid (ABA) signal transduction. Negative regulator of ABA promotion of stomatal closure. Encodes a protein phosphatase 2C and is involved in ABA signal transduction. Binds fibrillin preprotein in vitro and in vivo. mutant has ABA hypersensitive inhibition of seed germination Protein Phosphatase 2C regulates the activation of the Snf1-related kinase OST1 by abscisic acid. Prot…
Wa8730a015g003250	2.37589	1.16953e-16	1.63056e-12	0.322	0.15	AT3G30842 AT1G15520	ABCG38, ATPDR10, PDR10 ABCG40, ATABCG40, ATPDR12, PDR12	pleiotropic drug resistance 10 ABC transporter family involved in ABA transport and resistance to lead. Localizes to plasma membrane. Upregulated by lead. Expressed in leaves, flowers, stomata and roots.
Wa8730a003g006350	2.37567	1.76919e-153	2.4666e-149	0.622	0.084	AT5G09410 AT2G22300 AT1G77680	CAMTA1, EICBP.B CAMTA3, SR1	calmodulin-binding protein, similar to another ethylene-upregulated calmodulin-binding protein ER1 GI:11612392 from (Nicotiana tabacum) Encodes a putative CAM binding transcription factor. Loss of function mutations show enhanced resistance to fungal and bacterial pathogens suggesting that CAMTA functions to suppress defense responses. Ribonuclease II/R family protein
Wa8730a004g002910	2.37102	2.20997e-35	3.08114e-31	0.426	0.152	AT5G42180 AT4G25980 AT4G30170 AT4G17690 AT4G36430 AT5G19880 AT4G11290	PER64	Peroxidase superfamily protein Peroxidase superfamily protein Peroxidase family protein Peroxidase superfamily protein Peroxidase superfamily protein Peroxidase superfamily protein Peroxidase superfamily protein
Wa8730a015g003240	2.33648	7.80099e-69	1.08761e-64	0.733	0.3	AT3G30842 AT1G15520	ABCG38, ATPDR10, PDR10 ABCG40, ATABCG40, ATPDR12, PDR12	pleiotropic drug resistance 10 ABC transporter family involved in ABA transport and resistance to lead. Localizes to plasma membrane. Upregulated by lead. Expressed in leaves, flowers, stomata and roots.
Wa8730a018g001940	2.31214	3.74482e-93	5.22103e-89	0.589	0.131	AT2G41010 AT3G56880	ATCAMBP25, CAMBP25	Encodes a novel calmodulin binding protein whose gene expression is induced by dehydration and ionic (salt) and non-ionic (mannitol) osmotic stress. Lines over-expressing this gene are more sensitive and anti-sense lines are more tolerant to osmotic stress, suggesting this gene may be a negative regulator of response to osmotic stress. VQ motif-containing protein
Wa8730a004g003130	2.29962	1.4856e-80	2.07123e-76	0.781	0.311	AT3G24540	AtPERK3, PERK3	Encodes a member of the proline-rich extensin-like receptor kinase (PERK) family. This family consists of 15 predicted receptor kinases (PMID: 15653807).
Wa8730a017g002670	2.27868	1.88439e-126	2.62722e-122	0.619	0.106	AT2G17890 AT4G36070 AT5G66210 AT5G24430	CPK16 CPK18 CPK28	member of Calcium Dependent Protein Kinase member of Calcium Dependent Protein Kinase member of Calcium Dependent Protein Kinase Calcium-dependent protein kinase (CDPK) family protein
Wa8730a002g001220	2.27603	2.8651e-87	3.99452e-83	0.57	0.128	AT5G52640 AT4G24190 AT5G56030	ATHS83, ATHSP90.1, AtHsp90-1, HSP81-1, HSP81.1, HSP83, HSP90.1 AtHsp90-7, AtHsp90.7, HSP90.7, SHD AtHsp90.2, ERD8, HSP81-2, HSP81.2, HSP90.2	Encodes a cytosolic heat shock protein AtHSP90.1. AtHSP90.1 interacts with disease resistance signaling components SGT1b and RAR1 and is required for RPS2-mediated resistance. encodes an ortholog of GRP94, an ER-resident HSP90-like protein and is involved in regulation of meristem size and organization. Single and double mutant analyses suggest that SHD may be required for the correct folding and…
Wa8730a004g007490	2.24533	8.34681e-75	1.16371e-70	0.904	0.565	AT3G24530		AAA-type ATPase family protein / ankyrin repeat family protein
Wa8730a015g005840	2.23926	2.41553e-104	3.36773e-100	0.411	0.048
Wa8730a010g005650	2.20015	5.26431e-86	7.33951e-82	0.87	0.448	AT3G19940		Encodes a hexose-H(+) symporter that catalyzes the high-affinity uptake of glucose, galactose and mannose that is induced under low-glucose conditions in pollen tubes.
Wa8730a015g004680	2.19061	1.3626e-65	1.89973e-61	0.741	0.334	AT3G28340 AT1G13250 AT1G24170 AT1G70090	GATL10, GolS8 GATL3 GATL8, LGT9 GATL9, LGT8	Encodes a protein with putative galacturonosyltransferase activity. Encodes a protein with putative galacturonosyltransferase activity. Encodes a protein with putative galacturonosyltransferase activity. Encodes a protein with putative galacturonosyltransferase activity.
Wa8730a009g001650	2.18964	4.61858e-91	6.43922e-87	0.389	0.05	AT2G29890 AT2G41740 AT3G57410	ATVLN1, VLN1 ATVLN2, VLN2 ATVLN3, VLN3	Encodes a ubiquitously expressed villin-like protein, whose mRNA may be alternatively processed. Villin belongs to a superfamily of actin binding proteins called the villin/gelsolin family. Animal villins are involved in actin binding. VLN1 protein co-localizes with actin filaments in several assays. VLN1 binds and bundles F-actin in a calcium-independent manner. It does not nucleate, cap or seve…
Wa8730a014g001210	2.18713	3.21903e-88	4.48797e-84	0.633	0.165	AT2G03450 AT1G13900	ATPAP9, PAP9 PAP2	purple acid phosphatase 9 Encodes a dual-localized acid phosphatase (mitochondria and chloroplast) that modulates carbon metabolism.
Wa8730a005g006290	2.18061	4.33917e-76	6.04967e-72	0.359	0.051	AT2G21490	LEA	dehydrin LEA
Wa8730a019g001460	2.16214	1.06942e-80	1.49099e-76	0.785	0.325	AT2G30490 AT2G40890	ATC4H, C4H, CYP73A5, REF3 CYP98A3	Encodes a cinnamate-4-hydroxylase. Mutations in this gene impact phenylpropanoid metabolism, growth and development. encodes coumarate 3-hydroxylase (C3H), a P450-dependent monooxygenase. Involved in lignin biosynthesis and flavonoid biosynthesis. Also affects the biosynthesis of coumarins such as scopoletin and scopolin as a branching-out-pathway from the phenylpropanoid acid level.
Wa8730a010g004820	2.14423	1.34001e-137	1.86824e-133	0.43	0.035	AT5G15730 AT5G47850 AT4G31250	AtCRLK2, CRLK2 CCR4	Protein kinase superfamily protein CRINKLY4 related 4 Leucine-rich repeat protein kinase family protein
Wa8730a017g002000	2.11562	2.14255e-62	2.98714e-58	0.763	0.417	AT4G12030 AT4G22840	BASS5, BAT5	Required for the biosynthesis of methionine-derived glucosinolates. Involved in the transport of 2-keto acids between chloroplasts and the cytosol. Sodium Bile acid symporter family
Wa8730a014g005470	2.10569	2.3026e-56	3.21029e-52	0.744	0.375	AT5G66050		Wound-responsive family protein
Wa8730a005g008320	2.09461	4.71019e-158	6.56694e-154	0.526	0.049	AT1G26150 AT1G70740 AT1G49100 AT1G29740	AtPERK10, PERK10	Encodes a member of the proline-rich extensin-like receptor kinase (PERK) family. This family consists of 15 predicted receptor kinases (PMID: 15653807). Protein kinase superfamily protein Leucine-rich repeat protein kinase family protein Leucine-rich repeat transmembrane protein kinase
Wa8730a020g001680	2.08993	5.45832e-77	7.60999e-73	0.415	0.072	AT1G17420 AT1G67560	ATLOX3, LOX3 ATLOX6, LOX6	Lipoxygenase PLAT/LH2 domain-containing lipoxygenase family protein
Wa8730a003g001330	2.04928	3.74789e-44	5.22531e-40	0.578	0.231	AT4G37850 AT2G22750		basic helix-loop-helix (bHLH) DNA-binding superfamily protein basic helix-loop-helix (bHLH) DNA-binding superfamily protein
Wa8730a001g006690	2.04307	4.79387e-90	6.68361e-86	0.837	0.331	AT2G40180 AT2G30020 AT1G07160	ATHPP2C5, PP2C5	Encodes PP2C5, a member of the PP2C family phosphatases. PP2C5 acts as a MAPK phosphatase that positively regulates seed germination, stomatal closure and ABA-inducible gene expression. Encodes AP2C1. Belongs to the clade B of the PP2C-superfamily. Acts as a MAPK phosphatase that negatively regulates MPK4 and MPK6. Protein phosphatase 2C family protein
Wa8730a010g005120	2.03657	9.03257e-81	1.25932e-76	0.807	0.361	AT4G30600		signal recognition particle receptor alpha subunit family protein
Wa8730a017g003480	2.03405	1.2172e-75	1.69703e-71	0.878	0.495	AT5G03380 AT2G28090 AT2G36950		Heavy metal transport/detoxification superfamily protein Heavy metal transport/detoxification superfamily protein Heavy metal transport/detoxification superfamily protein
Wa8730a012g000770	2.02993	4.69537e-33	6.54629e-29	0.337	0.103	AT5G08720		Encodes PIN2 PROMOTER BINDING PROTEIN 1 (PPP1), an evolutionary conserved plant-specific DNA binding protein that acts on transcription of PIN genes. Also named as HCF145. Mutations in HCF145 have reduced level of the tricistronic psaA-psaB-rps (small-subunit ribosomal protein)14 mRNA which encodes for the major subunits of the photosystem I (PSI). HCF145 binds to the 5'UTR of PSAA via a novel TM…
Wa8730a007g000990	2.01376	8.15402e-21	1.13683e-16	0.415	0.202
Wa8730a002g004460	2.00599	5.43742e-81	7.58085e-77	0.881	0.43	AT4G38580 AT1G71050 AT4G35060 AT5G66110	ATFP6, FP6, HIPP26 HIPP20 HIPP25 HIPP27	putative farnesylated protein (At4g38580) mRNA, complete Heavy metal transport/detoxification superfamily protein Heavy metal transport/detoxification superfamily protein Heavy metal transport/detoxification superfamily protein
Wa8730a001g003140	2.00387	6.02232e-85	8.39632e-81	0.841	0.358	AT5G18670	BAM9, BMY3	putative beta-amylase BMY3 (BMY3)
Wa8730a002g003450	2.00122	2.89194e-60	4.03194e-56	0.704	0.31	AT2G35710 AT4G16600	PGSIP7 PGSIP8	Nucleotide-diphospho-sugar transferases superfamily protein Nucleotide-diphospho-sugar transferases superfamily protein
Wa8730a013g001840	1.99889	4.0485e-79	5.64441e-75	0.526	0.116	AT2G46620		P-loop containing nucleoside triphosphate hydrolases superfamily protein
Wa8730a002g009830	1.97323	3.54213e-104	4.93843e-100	0.441	0.057	AT3G23530		Cyclopropane-fatty-acyl-phospholipid synthase
Wa8730a004g000410	1.94385	2.19643e-74	3.06226e-70	0.781	0.311	AT1G53170 AT3G23240 AT1G04370 AT2G31230	ATERF-8, ATERF8, ERF8 ATERF1, ERF1 ATERF14, ERF14 ATERF15, ERF15	encodes a member of the ERF (ethylene response factor) subfamily B-1 of ERF/AP2 transcription factor family (ATERF-8). The protein contains one AP2 domain. There are 15 members in this subfamily including ATERF-3, ATERF-4, ATERF-7, and leafy petiole. encodes a member of the ERF (ethylene response factor) subfamily B-3 of ERF/AP2 transcription factor family (ERF1). The protein contains one AP2 dom…
Wa8730a001g006070	1.93002	4.07851e-78	5.68626e-74	0.77	0.301	AT3G10940	LSF2	Encodes a protein with a predicted dual-specificity phosphatase domain, similar to the glucan phosphorylases SEX4 and LSF1, however, it lacks the carbohydrate binding domain present in those proteins. Has phosphoglucan phosphatase activity. It binds to starch and specifically hydrolyzes phosphate from the C3-position.
Wa8730a015g001560	1.91937	1.1134e-24	1.5523e-20	0.559	0.317	AT5G48540		receptor-like protein kinase-related family protein
Wa8730a017g003290	1.91232	7.3157e-55	1.01995e-50	0.441	0.116	AT4G04955	ALN, ATALN	Encodes an allantoinase which is involved in allantoin degradation and assimilation. Gene expression was induced when allantoin was added to the medium. The insertion mutant, ataln m2-1, did not grow well on the MS medium where allantoin, instead of ammonium nitrate, was supplied.
Wa8730a007g008470	1.90081	6.16449e-44	8.59454e-40	0.563	0.227	AT5G42100 AT2G27500 AT4G34480 AT4G18340 AT2G16230	ATBG_PPAP, BG_PPAP	encodes a plasmodesmal (Pd)-associated membrane protein involved in plasmodesmal callose degradation, i.e. beta-1,3-glucanase (EC 3.2.1.39), and functions in the gating of Pd Glycosyl hydrolase superfamily protein O-Glycosyl hydrolases family 17 protein Glycosyl hydrolase superfamily protein O-Glycosyl hydrolases family 17 protein
Wa8730a010g006490	1.89636	1.25694e-71	1.75243e-67	0.93	0.681	AT4G28050 AT2G23810 AT4G30430	TET7 TET8 TET9	Member of TETRASPANIN family Member of TETRASPANIN family Member of TETRASPANIN family
Wa8730a012g001430	1.8885	2.63642e-41	3.6757e-37	0.256	0.048	AT5G63450 AT3G48520 AT1G34540 AT5G08250	CYP94B1 CYP94B3 CYP94D1	member of CYP94B member of CYP94B member of CYP94D Cytochrome P450 superfamily protein
Wa8730a002g001010	1.86104	7.11994e-64	9.92662e-60	0.585	0.182	AT1G01570		Protein of unknown function (DUF604)
Wa8730a012g004170	1.85501	6.51901e-64	9.0888e-60	0.559	0.171	AT1G78720 AT2G34250 AT1G29310		SecY protein transport family protein SecY protein transport family protein SecY protein transport family protein
Wa8730a017g001840	1.84413	4.35027e-77	6.06514e-73	0.581	0.154	AT5G51460 AT4G12430 AT4G22590	ATTPPA, TPPA TPPF TPPG	homologous to the C-terminal part of microbial trehalose-6-phosphate phosphatases Haloacid dehalogenase-like hydrolase (HAD) superfamily protein Haloacid dehalogenase-like hydrolase (HAD) superfamily protein
Wa8730a017g003260	1.83387	2.34365e-90	3.26752e-86	0.419	0.06	AT3G19970		alpha/beta-Hydrolases superfamily protein
Wa8730a007g004510	1.83194	5.74819e-35	8.01412e-31	0.689	0.412	AT1G28200 AT5G13200	FIP1	VirF-interacting protein FIP1 Encodes a protein with unknown function that is involved in hormone mediated regulation of seed germination/dormancy.
Wa8730a007g002940	1.8301	5.07652e-32	7.07768e-28	0.33	0.098	AT4G24960 AT5G50720 AT2G42820	ATHVA22D, HVA22D ATHVA22E, HVA22E HVA22F	Homologous to a eukaryote specific ABA- and stress-inducible gene first isolated from barley. Groups in one subfamily with ATHVA22E. Along with other members of the ATHVA22 family, it may be involved in regulation of autophagy during development. Encodes one of five HVA22 homologs in Arabidopsis. HVA22 is an ABA- and stress-inducible gene first isolated from barley. Members of this gene family ha…
Wa8730a010g003440	1.82133	1.43197e-58	1.99645e-54	0.722	0.314	AT3G49940 AT1G67100 AT3G02550 AT1G68510	LBD38 LBD40 LBD41 LBD42	LOB domain-containing protein 38 LOB domain-containing protein 40 LOB domain-containing protein 41 LOB domain-containing protein 42
Wa8730a006g000870	1.80662	2.8972e-74	4.03927e-70	0.385	0.064	AT1G79350	EMB1135	Encodes the Arabidopsis thaliana orthologue of metazoan Strawberry notch, a highly conserved co-activator of the developmental regulator Notch. It mediates stress-induced chromatin memory by modulating nucleosome occupancy by interacting with chromatin remodeling proteins of the ISWI and SWI/SNF classes.
Wa8730a011g005230	1.79833	4.39243e-57	6.12392e-53	0.704	0.308	AT4G31800 AT1G80840 AT2G25000	ATWRKY18, WRKY18 ATWRKY40, WRKY40 ATWRKY60, WRKY60	Pathogen-induced transcription factor. Binds W-box sequences in vitro. Forms protein complexes with itself and with WRKY40 and WRKY60. Constitutive expression of WRKY18 enhanced resistance to P. syringae, but its coexpression with WRKY40 or WRKY60 made plants more susceptible to both P. syringae and B. cinerea. WRKY18, WRKY40, and WRKY60 have partially redundant roles in response to the hemibiotr…
Wa8730a014g003980	1.79659	8.2182e-54	1.14578e-49	0.463	0.131
Wa8730a014g000450	1.79568	2.05324e-64	2.86263e-60	0.615	0.203	AT1G49560 AT4G37180		Homeodomain-like superfamily protein myb family transcription factor, contains Pfam domain, PF00249: Myb-like DNA-binding domain l also isolated as a putative cytoskeletal protein in a yeast screen
Wa8730a009g000380	1.79289	1.85656e-45	2.58841e-41	0.422	0.126	AT3G53880 AT2G37770	AKR4C11 AKR4C9, ChlAKR	NAD(P)-linked oxidoreductase superfamily protein Encodes an NADPH-dependent aldo-keto reductase that can act on a wide variety of substrates in vitro including saturated and unsaturated aldehydes, steroids, and sugars. GFP-tagged AKR4C9 localizes to the chloroplast where it may play a role in detoxifying reactive carbonyl compounds that threaten to impair the photosynthetic process. Transcript le…
Wa8730a001g011500	1.77477	9.76317e-81	1.36118e-76	0.452	0.082	AT2G29735 AT3G55430 AT4G34480 AT2G39640 AT3G46570	NA	NA O-Glycosyl hydrolases family 17 protein O-Glycosyl hydrolases family 17 protein glycosyl hydrolase family 17 protein Glycosyl hydrolase superfamily protein
Wa8730a006g002900	1.77426	2.32886e-24	3.2469e-20	0.348	0.134	AT3G25230 AT5G48570	ATFKBP62, FKBP62, ROF1 ATFKBP65, FKBP65, ROF2	Encodes a a high molecular weight member of the FK506 binding protein (FKBP) family. It has three FKBP12-like domains, tetratricopeptide repeats, and a putative calmodulin binding domain. Modulates thermotolerance by interacting with HSP90.1 and affecting the accumulation of HsfA2-regulated sHSPs. Encodes one of the 36 carboxylate clamp (CC)-tetratricopeptide repeat (TPR) proteins (Prasad 2010, P…
Wa8730a001g005100	1.76977	3.43248e-46	4.78556e-42	0.563	0.228	AT5G04930	ALA1	Encodes a putative aminophospholipid translocase (p-type ATPase) involved in chilling response.
Wa8730a019g000760	1.76685	3.04761e-77	4.24897e-73	0.611	0.158	AT5G03540 AT3G55150 AT2G39380 AT3G09520 AT1G07725 AT5G59730 AT2G28650	ATEXO70A1, EXO70A1 ATEXO70H1, EXO70H1 ATEXO70H2, EXO70H2 ATEXO70H4, EXO70H4 ATEXO70H6, EXO70H6 ATEXO70H7, EXO70H7 ATEXO70H8, EXO70H8	AtEXO70A1 is a member of EXO70 gene family, putative exocyst subunits, conserved in land plants. Arabidopsis thaliana contains 23 putative EXO70 genes, which can be classified into nine clusters on the phylogenetic tree A member of EXO70 gene family, putative exocyst subunits, conserved in land plants. Arabidopsis thaliana contains 23 putative EXO70 genes, which can be classified into eight clust…
Wa8730a018g001130	1.75996	2.53268e-69	3.53106e-65	0.541	0.141	AT2G38280	ATAMPD, FAC1	Encodes a protein with in vitro AMP deaminase activity that is involved in embryogenesis. Homozygous mutant embryos fail to develop past the zygote stage.
Wa8730a015g004620	1.75979	7.04501e-40	9.82215e-36	0.459	0.168
Wa8730a012g000410	1.74708	1.27982e-65	1.78432e-61	0.504	0.127	AT2G27350	OTLD1	Encodes an otubain-like histone deubiquitinase involved in chromatin modification and regulation of plant gene expression.
Wa8730a011g005220	1.73206	4.90835e-53	6.84322e-49	0.789	0.436	AT2G25090 AT4G30960 AT5G58380 AT5G45820 AT5G25110 AT5G10930	AtCIPK16, CIPK16, SnRK3.18 ATCIPK6, CIPK6, SIP3, SNRK3.14 CIPK10, PKS2, SIP1, SNRK3.8 CIPK20, PKS18, SnRK3.6 CIPK25, SnRK3.25 CIPK5, SnRK3.24	Encodes a member of the SNF1-related kinase (SnRK) gene family (SnRK3.18), which has also been reported as a member of the CBL-interacting protein kinases (CIPK16). Encodes CBL-interacting protein kinase 6 (CIPK6). Required for development and salt tolerance. Encodes a CBL-interacting protein kinase with similarity to SOS protein kinase. Encodes a CBL-interacting serine/threonine protein kinase c…
Wa8730a003g000840	1.72723	1.6344e-39	2.27868e-35	0.433	0.145	AT5G66650 AT4G36820 AT2G23790 AT5G42610		Protein of unknown function (DUF607) Protein of unknown function (DUF607) Protein of unknown function (DUF607) Protein of unknown function (DUF607)
Wa8730a004g008480	1.72573	9.64707e-47	1.34499e-42	0.652	0.28	AT3G24500	ATMBF1C, MBF1C	One of three genes in A. thaliana encoding multiprotein bridging factor 1, a highly conserved transcriptional coactivator. May serve as a bridging factor between a bZIP factor and TBP. Its expression is specifically elevated in response to pathogen infection, salinity, drought, heat, hydrogen peroxide, and application of abscisic acid or salicylic acid. Constitutive expression enhances the tolera…
Wa8730a008g003440	1.72081	5.7678e-39	8.04147e-35	0.581	0.274	AT1G30640 AT3G23310 AT2G20470		Protein kinase family protein AGC (cAMP-dependent, cGMP-dependent and protein kinase C) kinase family protein AGC (cAMP-dependent, cGMP-dependent and protein kinase C) kinase family protein
Wa8730a003g006290	1.71792	1.61547e-47	2.25228e-43	0.511	0.173	AT1G78230 AT3G17920		Outer arm dynein light chain 1 protein Outer arm dynein light chain 1 protein
Wa8730a003g005710	1.71427	2.30692e-52	3.21631e-48	0.47	0.135	AT4G08580		microfibrillar-associated protein-related
Wa8730a013g005360	1.71298	1.99034e-76	2.77493e-72	0.548	0.129	AT3G23920	AtBAM1, BAM1, BMY7, TR-BAMY	Encodes a chloroplast beta-amylase. Is necessary for leaf starch breakdown in the absence of BAM3.
Wa8730a020g001370	1.71147	4.13953e-26	5.77133e-22	0.533	0.298	AT2G33480 AT5G13180	ANAC041, NAC041 ANAC083, NAC083, VNI2	NAC domain containing protein 41 Encodes a NAC domain transcription factor that interacts with VND7 and negatively regulates xylem vessel formation.
Wa8730a005g004510	1.70834	1.19457e-73	1.66547e-69	0.389	0.066	AT5G53050		alpha/beta-Hydrolases superfamily protein
Wa8730a015g003100	1.69076	1.85236e-13	2.58255e-09	0.248	0.11	AT1G54510 AT3G04810 AT3G20860 AT3G12200 AT1G15530	ATNEK1, NEK1 ATNEK2, NEK2 ATNEK5, NEK5 AtNek7, Nek7 LecRK-S.1	Encodes AtNEK1, a member of the NIMA-related serine/threonine kinases (Neks) that have been linked to cell-cycle regulation in fungi and mammals. Plant Neks might be involved in plant development processes. Encodes AtNek2, a member of the NIMA-related serine/threonine kinases (Neks) that have been linked to cell-cycle regulation in fungi and mammals. Plant Neks might be involved in plant developm…
Wa8730a013g004490	1.66017	2.41535e-54	3.36747e-50	0.904	0.743	AT2G31570 AT3G63080 AT1G63460	ATGPX2, GPX2 ATGPX5, GPX5, MEE42 ATGPX8, GPX8	glutathione peroxidase GPx Encodes glutathione peroxidase. Encodes GPX8 (glutathione peroxidase 8). Involved in the suppression of oxidative damages in nucleus and cytosol. The mRNA is cell-to-cell mobile.
Wa8730a001g004430	1.65492	3.36156e-38	4.68669e-34	0.548	0.248	AT1G08320	TGA9, bZIP21	bZIP transcription factor family protein
Wa8730a014g005560	1.65242	3.502e-39	4.88249e-35	0.459	0.163	AT4G35040 AT2G16770	bZIP19 bZIP23	Basic-region leucine zipper (bZIP19) transcription factor involved in the adaptation to zinc deficiency. Binds ZDRE motifs. Basic-region leucine zipper (bZIP23) transcription factor involved in the adaptation to zinc deficiency. Binds ZDRE motifs.
Wa8730a005g005240	1.64953	5.57069e-43	7.76666e-39	0.781	0.494	AT5G42050		DCD (Development and Cell Death) domain protein
Wa8730a019g001830	1.64365	5.78298e-78	8.06264e-74	0.952	0.716	AT1G01720 AT1G52890 AT4G27410	ANAC002, ATAF1 ANAC019, NAC019 ANAC072, RD26	Belongs to a large family of putative transcriptional activators with NAC domain. Transcript level increases in response to wounding and abscisic acid. ATAF1 attentuates ABA signaling and sythesis. Mutants are hyposensitive to ABA. encodes a NAC transcription factor whose expression is induced by drought, high salt, and abscisic acid. This gene binds to ERD1 promoter in vitro. Encodes a NAC trans…
Wa8730a005g006990	1.64069	2.36289e-62	3.29435e-58	0.448	0.107	AT3G27870 AT1G68710 AT1G26130		ATPase E1-E2 type family protein / haloacid dehalogenase-like hydrolase family protein ATPase E1-E2 type family protein / haloacid dehalogenase-like hydrolase family protein ATPase E1-E2 type family protein / haloacid dehalogenase-like hydrolase family protein
Wa8730a001g011310	1.63547	1.96885e-44	2.74498e-40	0.519	0.177	AT5G02500 AT3G12580 AT3G09440	AT-HSC70-1, AtHsp70-1, HSC70, HSC70-1, HSP70-1 ATHSP70, HSP70	encodes a member of heat shock protein 70 family. heat shock protein 70 Heat shock protein 70 (Hsp 70) family protein
Wa8730a004g008620	1.63377	6.67505e-37	9.30636e-33	0.348	0.102	AT1G15460 AT4G32510 AT5G25430	ATBOR4, BOR4	Encodes a efflux-type boron transporter. Over-expression improved plant growth under B toxic conditions. HCO3- transporter family HCO3- transporter family
Wa8730a008g002350	1.63083	1.49618e-31	2.08597e-27	0.448	0.18	AT5G11540	AtGulLO3, GulLO3	Encodes a homolog of rat L-gulono-1,4-lactone (L-GulL) oxidase that is involved in the biosynthesis of L-ascorbic acid.
Wa8730a001g007370	1.61182	2.9768e-45	4.15026e-41	0.722	0.397	AT4G31550 AT2G24570	ATWRKY11, WRKY11 ATWRKY17, WRKY17	member of WRKY Transcription Factor Group II-d negative regulator of basal resistance to Pseudomonas syringae. member of WRKY Transcription Factor Group II-d negative regulator of basal resistance to Pseudomonas syringae.
Wa8730a016g001550	1.59516	3.89285e-41	5.42741e-37	0.648	0.321	AT1G35140 AT5G64260 AT5G09440 AT4G08950	EXL1, PHI-1 EXL2 EXL4 EXO	At1g35140 (At1g35140/T32G9_32) mRNA, complete cds EXORDIUM like 2 EXORDIUM like 4 Phosphate-responsive 1 family protein
Wa8730a001g002610	1.5916	2.41161e-36	3.36227e-32	0.685	0.38	AT4G15530	PPDK	Encodes a dual-targeted protein believed to act as a pyruvate, orthophosphate dikinase. These enzymes are normally associated with C4 photosynthesis which does not occur in Arabidopsis. However, PPDK may play a role in remobilizing nitrogen during leaf senescence in Arabidopsis. The product of the long transcript (.1 gene model) was shown to be targeted to the chloroplast, whereas the shorter tra…
Wa8730a009g006210	1.59111	4.13823e-55	5.76952e-51	0.5	0.151	AT1G27770 AT3G57330 AT4G37640 AT2G22950	ACA1, PEA1 ACA11 ACA2 ACA7	Encodes a chloroplast envelope Ca2+-ATPase with an N-terminal autoinhibitor. Lesion mimic phenotype when mutation in the gene is combined with a mutation in ACA4. Lesion mimic phenotype of double knockout can be suppressed by nutritional supplements that increase anion levels (e.g. 15 mM Nitrate, Chloride, or Phosphate) Encodes a calmodulin-regulated Ca(2+)-pump located in the endoplasmic reticul…
Wa8730a002g004950	1.57511	1.39354e-57	1.94288e-53	0.296	0.047	AT4G30150
Wa8730a012g004060	1.57511	5.22638e-71	7.28662e-67	0.37	0.06	AT5G37500 AT3G02850	GORK SKOR	Encodes a guard cell outward potassium channel. Belongs to the Shaker family K+ channel. This family includes five groups based on phylogenetic analysis (FEBS Letters (2007) 581: 2357): I (inward rectifying channel): AKT1 (AT2G26650), AKT5 (AT4G32500) and SPIK (also known as AKT6, AT2G25600) II (inward rectifying channel): KAT1 (AT5G46240) and KAT2 (AT4G18290) III (weakly inward rectifying channe…
Wa8730a006g001290	1.57076	2.67216e-19	3.72553e-15	0.393	0.19	AT2G32210 AT3G22240
Wa8730a002g005400	1.5685	2.40699e-32	3.35583e-28	0.47	0.188	AT1G32900	GBSS1	UDP-Glycosyltransferase superfamily protein
Wa8730a004g004350	1.56166	6.80065e-70	9.48147e-66	0.456	0.092	AT5G11210	ATGLR2.5, GLR2.5	member of Putative ligand-gated ion channel subunit family
Wa8730a001g012190	1.54662	5.31632e-32	7.41201e-28	0.33	0.102	AT5G01100 AT3G54100 AT2G37980	FRB1	O-fucosyltransferase family protein O-fucosyltransferase family protein O-fucosyltransferase family protein
Wa8730a005g008250	1.54527	4.05257e-73	5.65009e-69	0.256	0.024	AT1G26370	RID1	RNA helicase family protein
Wa8730a008g002490	1.544	8.70355e-52	1.21345e-47	0.385	0.09	AT3G50380		Protein of unknown function (DUF1162)
Wa8730a005g003750	1.54286	1.96219e-20	2.73569e-16	0.422	0.216	AT3G25780	AOC3	Encodes allene oxide cyclase, one of the enzymes involved in jasmonic acid biosynthesis. One of four genes in Arabidopsis that encode this enzyme. mRNA expression is upregulated in senescing leaves. Note: Nomenclature for Arabidopsis allene oxide cyclase 3 (AOC3, AT3G25780) gene is based on Stenzel et al. 2003 Plant Molecular Biology 51:895-911. AOC3 (AT3G25780) is also referred to as AOC2 in He …
Wa8730a010g000100	1.53387	2.65482e-79	3.70135e-75	0.378	0.054	AT3G16340 AT3G53480	ABCG29, ATPDR1, AtABCG29, PDR1 ABCG37, ATPDR9, PDR9, PIS1	Encodes a p-coumaryl alcohol exporter involved in lignin biosynthesis. Negative regulator of auxin polar transport inhibitors. ABCG37 regulates auxin distribution and homeostasis in roots by excluding IBA from the root apex, but does not act directly in basipetal transport. ABCG37 and ABCG36 act redundantly at outermost root plasma membranes and, transport IBA out of the cells.
Wa8730a008g003600	1.53292	5.34327e-51	7.44959e-47	0.419	0.11
Wa8730a011g005620	1.52589	2.12658e-35	2.96488e-31	0.452	0.171	AT2G24720 AT4G31710 AT5G11180	ATGLR2.2, GLR2.2 ATGLR2.4, AUG8, GLR2.4 ATGLR2.6, GLR2.6	member of Putative ligand-gated ion channel subunit family member of Putative ligand-gated ion channel subunit family member of Putative ligand-gated ion channel subunit family
Wa8730a016g001540	1.52548	3.75054e-17	5.229e-13	0.511	0.314	AT1G35140 AT5G64260 AT5G09440 AT4G08950	EXL1, PHI-1 EXL2 EXL4 EXO	At1g35140 (At1g35140/T32G9_32) mRNA, complete cds EXORDIUM like 2 EXORDIUM like 4 Phosphate-responsive 1 family protein
Wa8730a003g004430	1.52369	5.34029e-85	7.44543e-81	0.322	0.034	AT1G55020 AT3G22400	ATLOX1, LOX1 ATLOX5, LOX5	lipoxygenase, a defense gene conferring resistance Xanthomonas campestris Encodes lipoxygenase5 (LOX5). LOX5 activity in roots facilitates green peach aphid colonization of Arabidopsis foliage by promoting green peach aphid feeding from sieve element and water consumption from xylem.
Wa8730a015g004800	1.52089	3.04106e-37	4.23985e-33	0.456	0.17
Wa8730a004g004700	1.51934	1.68987e-63	2.35602e-59	0.289	0.04	AT5G54800 AT1G61800	ATGPT1, GPT1 ATGPT2, GPT2	Encodes glucose6-Phosphate/phosphate transporter 1. Essential for pollen maturation and embryo sac development. glucose6-Phosphate/phosphate transporter 2
Wa8730a006g004080	1.51554	2.1284e-77	2.96742e-73	0.4	0.066	AT1G33680 AT4G10070 AT5G50940		KH domain-containing protein KH domain-containing protein RNA-binding KH domain-containing protein
Wa8730a002g005830	1.51394	4.3832e-34	6.11106e-30	0.563	0.257	AT1G76520 AT5G65980 AT2G17500 AT1G20925		Auxin efflux carrier family protein Auxin efflux carrier family protein Auxin efflux carrier family protein Auxin efflux carrier family protein
Wa8730a004g008230	1.50301	1.10013e-40	1.5338e-36	0.341	0.087
Wa8730a011g003790	1.50167	6.19815e-33	8.64147e-29	0.615	0.306	AT5G57620 AT5G67300 AT4G37260	AtMYB36, MYB36 ATMYB44, ATMYBR1, MYB44, MYBR1 ATMYB73, MYB73	Encodes a putative transcription factor (MYB36). Member of the R2R3 factor MYB gene family involved in mediating plant responses to a variety of abiotic stimiuli. Member of the R2R3 factor gene family.
Wa8730a001g005110	1.50154	1.83487e-51	2.55817e-47	0.674	0.292	AT2G33480 AT3G15170 AT3G29035 AT5G18270 AT5G39610 AT3G04060 AT3G12977	ANAC041, NAC041 ANAC054, ATNAC1, CUC1 ANAC059, ATNAC3, NAC3, ORS1 ANAC087 ANAC092, ATNAC2, ATNAC6, NAC2, NAC6, ORE1 NAC046, anac046	NAC domain containing protein 41 Encodes a transcription factor involved in shoot apical meristem formation and auxin-mediated lateral root formation. The gene is thought not to be involved in stress responses (NaCl, auxins, ethylene). <i>Cuc</i> mutant was first recognized at the heart stage, where embryos lacking two distinct bulges of cotyledonary primordia were observed. Encodes a protein wit…
Wa8730a011g003230	1.50105	1.5993e-15	2.22974e-11	0.226	0.084	AT1G73680	ALPHA, alpha-DOX2	Encodes an alpha dioxygenase. Recombinant protein catalyzes the conversion of a wide range of fatty acids into 2(R)-hydroperoxy derivatives.
Wa8730a003g004240	1.5	1.60278e-36	2.2346e-32	0.463	0.169	AT2G41870 AT3G57540		Remorin family protein Remorin family protein
Wa8730a004g008440	1.49347	2.3448e-58	3.26912e-54	0.53	0.152
Wa8730a007g006910	1.49336	1.15606e-42	1.61178e-38	0.778	0.5	AT1G01720 AT5G63790 AT5G08790 AT1G77450	ANAC002, ATAF1 ANAC102, NAC102 ATAF2, anac081 NAC032, anac032	Belongs to a large family of putative transcriptional activators with NAC domain. Transcript level increases in response to wounding and abscisic acid. ATAF1 attentuates ABA signaling and sythesis. Mutants are hyposensitive to ABA. Encodes a member of the NAC family of transcription factors. ANAC102 appears to have a role in mediating response to low oxygen stress (hypoxia) in germinating seedlin…
Wa8730a012g004920	1.48591	4.09184e-58	5.70484e-54	0.385	0.081	AT4G33500		Protein phosphatase 2C family protein
Wa8730a015g005040	1.48425	1.37315e-36	1.91444e-32	0.541	0.241
Wa8730a001g004200	1.48214	1.44862e-53	2.01966e-49	0.467	0.131	AT4G02075 AT1G02610	PIT1	RING/FYVE/PHD zinc finger superfamily protein RING/FYVE/PHD zinc finger superfamily protein
Wa8730a008g000930	1.46636	2.22643e-32	3.10408e-28	0.404	0.146	AT5G44240	ALA2	Expression is upregulated in the shoot of cax1/cax3 mutant. The mRNA is cell-to-cell mobile.
Wa8730a001g003830	1.46264	4.67538e-44	6.51841e-40	0.467	0.148	AT3G16720 AT2G47560 AT4G15975	ATL2, TL2	RING-H2 protein induced after exposure to chitin or inactivated crude cellulase preparations. RING/U-box superfamily protein RING/U-box superfamily protein
Wa8730a019g000680	1.45817	1.29397e-44	1.80406e-40	0.633	0.27	AT5G59820 AT2G37430 AT3G46090 AT2G28710 AT1G02030 AT5G03510 AT3G53600	AtZAT12, RHL41, ZAT12 ZAT11 ZAT7	Encodes a zinc finger protein involved in high light and cold acclimation. Overexpression of this putative transcription factor increases the expression level of 9 cold-responsive genes and represses the expression level of 15 cold-responsive genes, including CBF genes. Also, lines overexpressing this gene exhibits a small but reproducible increase in freeze tolerance. Because of the repression o…
Wa8730a019g001080	1.45507	1.46279e-40	2.03942e-36	0.459	0.16	AT2G30250 AT2G38470 AT5G07100	ATWRKY25, WRKY25 ATWRKY33, WRKY33 WRKY26	member of WRKY Transcription Factor Group I. Located in nucleus. Involved in response to various abiotic stresses - especially salt stress. Member of the plant WRKY transcription factor family. Regulates the antagonistic relationship between defense pathways mediating responses to P. syringae and necrotrophic fungal pathogens. Located in nucleus. Involved in response to various abiotic stresses -…
Wa8730a001g005860	1.45346	8.5261e-74	1.18871e-69	0.37	0.057	AT2G33050 AT1G58190 AT3G51740	AtRLP26, RLP26 AtRLP9, RLP9 IMK2	receptor like protein 26 receptor like protein 9 encodes a leucine-repeat receptor kinase expressed in inflorescence meristem. Locus association was made from performing sequence analysis with IMK3 (MRLK) whose locus association was provided by the authors.
Wa8730a005g004060	1.4532	9.51947e-21	1.32721e-16	0.426	0.214	AT5G53460	GLT1	NADH-dependent glutamate synthase
Wa8730a019g002860	1.45247	4.69102e-36	6.54021e-32	0.396	0.131	AT3G06170		Serinc-domain containing serine and sphingolipid biosynthesis protein
Wa8730a018g001290	1.44505	2.5717e-21	3.58547e-17	0.374	0.157	AT2G40340 AT2G38340 AT5G05410 AT3G11020 AT5G18450	AtERF48, DREB2C DREB19 DREB2, DREB2A DREB2, DREB2B	Encodes a member of the DREB subfamily A-2 of ERF/AP2 transcription factor family. The protein contains one AP2 domain. There are eight members in this subfamily including DREB2A AND DREB2B that are involved in response to drought. encodes a member of the DREB subfamily A-2 of ERF/AP2 transcription factor family. The protein contains one AP2 domain. There are eight members in this subfamily inclu…
Wa8730a007g006300	1.44505	4.81301e-46	6.7103e-42	0.363	0.084	AT2G18193 AT3G50940 AT3G28580		P-loop containing nucleoside triphosphate hydrolases superfamily protein P-loop containing nucleoside triphosphate hydrolases superfamily protein P-loop containing nucleoside triphosphate hydrolases superfamily protein
Wa8730a010g006210	1.44192	1.1159e-27	1.55578e-23	0.404	0.157	AT2G24580		FAD-dependent oxidoreductase family protein
Wa8730a007g002120	1.4409	2.40361e-35	3.35111e-31	0.352	0.105	AT3G25560 AT4G13810 AT5G48380 AT2G31880 AT1G12040 AT1G62440 AT1G78530 AT1G05700	AtNIK2, NIK2 AtRLP47, RLP47 BIR1 EVR, SOBIR1 LRX1 LRX2	NSP-interacting kinase 2 receptor like protein 47 Encodes a BAK1-interacting receptor-like kinase named BIR1. Negatively regulates multiple plant resistance signaling pathways, one of which is the SOBIR1(AT2G31880)-dependent pathway. Encodes a putative leucine rich repeat transmembrane protein that is expressed in response to Pseudomonas syringae. Expression of SRRLK may be required for silencing…
Wa8730a018g000530	1.42662	5.26471e-33	7.34006e-29	0.626	0.325	AT3G10330	AtTFIIB2, TFIIB2	Cyclin-like family protein
Wa8730a017g002010	1.42486	4.48814e-31	6.25736e-27	0.419	0.162	AT4G22850 AT2G02370 AT4G12000 AT1G12450		SNARE associated Golgi protein family SNARE associated Golgi protein family SNARE associated Golgi protein family SNARE associated Golgi protein family
Wa8730a005g001920	1.4228	8.4716e-54	1.18111e-49	0.626	0.225	AT1G45130 AT3G13750 AT4G26140 AT3G52840 AT4G36360 AT5G56870 AT2G28470	AtBGAL5, BGAL5 BGAL1 BGAL12 BGAL2 BGAL3 BGAL4 BGAL8	beta-galactosidase 5 beta-galactosidase, glycosyl hydrolase family 35 putative beta-galactosidase beta-galactosidase 2 putative beta-galactosidase (BGAL3 gene) beta-galactosidase 4 putative beta-galactosidase (BGAL8 gene)
Wa8730a001g001440	1.41554	4.34002e-55	6.05086e-51	0.278	0.042	AT5G19380 AT5G12170	CLT1 CLT3	Encodes one of the CRT-Like transporters (CLT1/AT5G19380, CLT2/AT4G24460, CLT3/AT5G12170). Required for glutathione homeostasis and stress responses. Mutants lacking these transporters are heavy metal-sensitive, glutathione(GSH)-deficient, and hypersensitive to Phytophthora infection. Encodes one of the CRT-Like transporters (CLT1/AT5G19380, CLT2/AT4G24460, CLT3/AT5G12170). Required for glutathio…
Wa8730a014g004040	1.40556	3.25124e-40	4.53288e-36	0.444	0.148	AT5G15730 AT4G00300 AT2G28970 AT5G24010	AtCRLK2, CRLK2	Protein kinase superfamily protein AT4G00300 has been split into two loci based on new cDNA evidence provided by Aleksander Riise Hansen of University of Copenhagen: AT4G00300.2 becomes AT4G00300.1 a new locus AT4G00295 is created. See comments field for AT4G00295 annotation. Leucine-rich repeat protein kinase family protein Protein kinase superfamily protein
Wa8730a001g000570	1.40207	1.74564e-61	2.43377e-57	0.311	0.047	AT1G02400 AT1G47990	ATGA2OX4, ATGA2OX6, DTA1, GA2OX6 ATGA2OX4, GA2OX4	Encodes a gibberellin 2-oxidase that acts on C19 gibberellins but not C20 gibberellins. Encodes a gibberellin 2-oxidase that acts on C19 gibberellins. AtGA2OX4 expression is responsive to cytokinin and KNOX activities.
Wa8730a015g004340	1.39058	2.142e-63	2.98638e-59	0.367	0.066	AT1G10560 AT1G60190 AT3G07360 AT1G49780 AT3G01400 AT4G12710	ATPUB18, PUB18 AtPUB19, PUB19 ATPUB9, PUB9 PUB26	Encodes a protein containing a UND, a U-box, and an ARM domain. This protein has E3 ubiquitin ligase activity based on in vitro assays. Encodes PUB19, a plant U-box armadillo repeat protein. Involved in salt inhibition of germination together with PUB18. The mRNA is cell-to-cell mobile. Encodes a protein containing a U-box and an ARM domain. This protein has E3 ubiquitin ligase activity based on …
Wa8730a003g000100	1.38887	1.08409e-42	1.51143e-38	0.526	0.193	AT5G10550 AT5G65630 AT1G17790	GTE2 GTE7	This gene is predicted to encode a bromodomain-containing protein. A plant line expressing RNAi constructs targeted against GTE7 shows some resistance to agrobacterium-mediated root transformation. This gene is predicted to encode a bromodomain-containing protein. Plant lines expressing RNAi constructs targeted against GTE7 show some resistance to agrobacterium-mediated root transformation. DNA-b…
Wa8730a008g004320	1.38552	1.07219e-30	1.49485e-26	0.541	0.259	AT4G04610 AT1G62180 AT4G21990	APR, APR1, ATAPR1, PRH19 APR2, APSR, ATAPR2, PRH, PRH43 APR3, ATAPR3, PRH-26, PRH26	Encodes a protein disulfide isomerase-like (PDIL) protein, a member of a multigene family within the thioredoxin (TRX) superfamily. This protein also belongs to the adenosine 5'-phosphosulfate reductase-like (APRL) group. encodes a adenosine 5'-phosphosulfate reductase, involved in sulfate assimilation. Is a major effect locus for natural variation of shoot sulfate content in Arabidopsis. Encodes…
Wa8730a012g005080	1.38331	6.72119e-37	9.37069e-33	0.578	0.273	AT5G09930 AT5G64840 AT4G33460 AT2G22120	ABCF2 ABCF5, ATGCN5, GCN5 ABCI10, ATNAP13, EMB2751	member of GCN subfamily member of GCN subfamily member of NAP subfamily RING/FYVE/PHD zinc finger superfamily protein
Wa8730a004g006020	1.37077	5.14672e-44	7.17556e-40	0.452	0.14	AT1G29395	COR413-TM1, COR413IM1, COR414-TM1	Integral membrane protein in the inner envelope of chloroplasts. Provide freezing tolerance. Expression is induced by short-term cold-treatment, water deprivation, and abscisic acid treatment.
Wa8730a014g001980	1.36825	8.63889e-18	1.20443e-13	0.363	0.175
Wa8730a017g002860	1.36524	1.03433e-33	1.44206e-29	0.7	0.429	AT4G02600 AT5G65970 AT2G39200 AT1G11310 AT2G17480	ATMLO1, MLO1 ATMLO10, MLO10 ATMLO12, MLO12 ATMLO2, MLO2, PMR2 ATMLO8, MLO8	A member of a large family of seven-transmembrane domain proteins specific to plants, homologs of the barley mildew resistance locus o (MLO) protein. The Arabidopsis genome contains 15 genes encoding MLO proteins, with localization in plasma membrane. Phylogenetic analysis revealed four clades of closely-related AtMLO genes. ATMLO1 belongs to the clade II, with ATMLO13 and ATMLO15. The gene is ex…
Wa8730a007g007390	1.35271	3.33709e-46	4.65257e-42	0.456	0.137	AT3G11670	DGD1	Responsible for the final assembly of galactolipids in photosynthetic membranes. Provides stability to the PS I core complex (e.g. subunits PsaD, PsaE).
Wa8730a007g006500	1.35154	4.62112e-45	6.44276e-41	0.585	0.228
Wa8730a011g003090	1.35039	6.87234e-38	9.58142e-34	0.3	0.074	AT2G13790 AT4G20140 AT1G56130	ATSERK4, BAK7, BKK1, SERK4 GSO1	somatic embryogenesis receptor-like kinase 4 Encodes GASSHO1 (GSO1), a putative leucine-rich repeat transmembrane-type receptor kinase. GSO1 and a homolog GSO2 (At5g44700) are required for the formation of a normal epidermal surface during embryogenesis. Leucine-rich repeat transmembrane protein kinase
Wa8730a005g005110	1.34891	9.07469e-36	1.26519e-31	0.367	0.108	AT5G42830		HXXXD-type acyl-transferase family protein
Wa8730a001g000910	1.32882	2.80899e-25	3.91629e-21	0.541	0.278
Wa8730a011g005250	1.32855	2.31398e-67	3.22614e-63	0.27	0.031	AT4G31890 AT2G25130		ARM repeat superfamily protein ARM repeat superfamily protein
Wa8730a018g000340	1.32043	5.277e-25	7.3572e-21	0.444	0.208	AT5G59570 AT3G46640 AT3G10760	BOA LUX, PCL1	Encodes BOA (BROTHER OF LUX ARRHYTHMO), a component of the circadian clock. The mRNA is cell-to-cell mobile. Encodes a myb family transcription factor with a single Myb DNA-binding domain (type SHAQKYF) that is unique to plants and is essential for circadian rhythms, specifically for transcriptional regulation within the circadian clock. LUX is required for normal rhythmic expression of multiple …
Wa8730a007g001450	1.31804	1.75651e-17	2.44893e-13	0.3	0.123	AT3G48360 AT5G63160	ATBT2, BT2 BT1	encodes a protein (BT2) that is an essential component of the TAC1-mediated telomerase activation pathway. Acts redundantly with BT3 and BT1 during female gametophyte development and with BT3 during male gametophyte development. BT2 also mediates multiple responses to nutrients, stresses, and hormones. BTB and TAZ domain protein. Short-lived nuclear-cytoplasmic protein targeted for degradation by…
Wa8730a001g009400	1.31271	3.53558e-36	4.92931e-32	0.441	0.159	AT2G34210		Transcription elongation factor Spt5
Wa8730a010g000810	1.3099	1.55339e-63	2.16574e-59	0.23	0.022	AT3G16380	PAB6	polyadenylate-binding protein, putative / PABP, putative, similar to polyadenylate-binding protein (poly(A)-binding protein) from {Arabidopsis thaliana} SP:P42731, (Cucumis sativus) GI:7528270, {Homo sapiens} SP:Q13310, {Arabidopsis thaliana} SP:Q05196 contains InterPro entry IPR000504: RNA-binding region RNP-1 (RNA recognition motif) (RRM). Member of the class III family of PABP proteins.
Wa8730a005g001280	1.3095	2.51374e-63	3.50466e-59	0.467	0.104	AT1G13150 AT4G39490 AT5G02900 AT4G32170 AT5G52320 AT2G21910 AT1G47620	CYP86C4 CYP96A10 CYP96A13 CYP96A2 CYP96A4 CYP96A5 CYP96A8	member of CYP86C member of CYP96A member of CYP96A member of CYP96A member of CYP96A member of CYP96A member of CYP96A
Wa8730a017g003280	1.30428	2.23945e-42	3.12224e-38	0.304	0.066
Wa8730a018g002160	1.30282	7.77655e-19	1.08421e-14	0.626	0.446
Wa8730a019g001270	1.30149	3.61143e-52	5.03505e-48	0.337	0.068	AT3G56320		PAP/OAS1 substrate-binding domain superfamily
Wa8730a005g002190	1.29813	2.66681e-33	3.71806e-29	0.385	0.128	AT4G33050 AT3G13600 AT3G52870 AT5G57010 AT2G26190	AtIQM1, EDA39, IQM1	Encodes a calmodulin-binding protein involved in stomatal movement. calmodulin-binding family protein IQ calmodulin-binding motif family protein calmodulin-binding family protein calmodulin-binding family protein
Wa8730a007g006870	1.29674	7.96065e-20	1.10987e-15	0.333	0.143	AT5G63970	RGLG3	Encodes a ubiquitin ligase that is an essential upstream modulator of JA signaling in response to various stimuli.
Wa8730a003g002120	1.29455	6.10234e-31	8.50789e-27	0.559	0.279	AT1G27760	ATSAT32, SAT32	Encodes a protein with similarity to human interferon-related developmental regulator (IFRD)that is involved in salt tolerance. Loss of function mutations are hypersensitive to salt stress and have reduced fertility. SAT32 is found in the cytoplasm but appears to translocate to the nucleus when plants are subject to salt stress.
Wa8730a001g010360	1.28471	6.29582e-31	8.77764e-27	0.411	0.146
Wa8730a015g002550	1.26601	1.64601e-21	2.29487e-17	0.467	0.239	AT1G42990	ATBZIP60, BZIP60	AtbZIP60 consists of a bZIP DNA binding domain followed by a putative transmembrane domain. GFP fusions containing the first 260 amino acids (AtbZIP60deltaC) are nuclear-localized. AtbZIP60 is upregulated by the addition of tunicamycin (ER stress response inductor), DTT (inhibitor of disulfide bond formation) and azetin-2-carboxylate (proline analog perturbing protein structure). Upon ER stress t…
Wa8730a014g001710	1.2605	1.2605e-48	1.75739e-44	0.259	0.041	AT5G59490 AT3G62040		Haloacid dehalogenase-like hydrolase (HAD) superfamily protein Haloacid dehalogenase-like hydrolase (HAD) superfamily protein
Wa8730a006g001280	1.25906	6.66669e-16	9.2947e-12	0.352	0.17	AT2G32210 AT3G22240
Wa8730a010g003610	1.25691	9.09341e-34	1.2678e-29	0.3	0.076
Wa8730a011g002000	1.25675	7.15183e-51	9.97108e-47	0.348	0.072
Wa8730a005g003350	1.2487	7.27223e-25	1.01389e-20	0.696	0.494	AT1G52245 AT3G16120	NA	NA Dynein light chain type 1 family protein
Wa8730a016g000830	1.24486	4.23049e-26	5.89814e-22	0.452	0.193
Wa8730a007g002230	1.2385	1.37903e-53	1.92265e-49	0.326	0.061	AT1G78560 AT3G25410		Sodium Bile acid symporter family Sodium Bile acid symporter family
Wa8730a003g006850	1.22466	3.64064e-24	5.07578e-20	0.344	0.125	AT1G74410		RING/U-box superfamily protein
Wa8730a015g006060	1.21275	5.11833e-33	7.13597e-29	0.337	0.1	AT3G01840 AT2G23770 AT5G35370	LYK2 LYK4	Encodes a putative LysM-containing receptor-like kinase. Induction of chitin-responsive genes by chitin treatment is not blocked in the mutant. Based on protein sequence alignment analysis, it was determined to be a pseudo kinase since lack of the ATP-binding P-loop in the kinase domain. Encodes a putative LysM-containing receptor-like kinase LYK4. Shares overlapping function with LYK5 in mediati…
Wa8730a004g003870	1.21272	1.5581e-35	2.17231e-31	0.237	0.048
Wa8730a009g000430	1.21113	2.00052e-33	2.78913e-29	0.33	0.095	AT2G39650		Protein of unknown function (DUF506)
Wa8730a009g006540	1.2099	1.46191e-24	2.0382e-20	0.522	0.273	AT1G69260 AT1G13740 AT3G29575	AFP1 AFP2 AFP3	ABI five binding protein Encodes a member of a small plant-specific gene family whose members interact with ABI5 and appear to be involved in mediating stress responses. AFP2 mutants affect a number of ABA mediated processes such as germination and response to osmotic and sugar stress. AFP2 nuclear localization is stress dependent. ABI five binding protein 3
Wa8730a007g004870	1.20944	5.4312e-11	7.57218e-07	0.426	0.277	AT4G10060 AT5G49900 AT1G33700		Beta-glucosidase, GBA2 type family protein Beta-glucosidase, GBA2 type family protein Beta-glucosidase, GBA2 type family protein
Wa8730a005g006550	1.20638	9.40668e-38	1.31148e-33	0.681	0.341	AT3G27880 AT5G14730		Protein of unknown function (DUF1645)
Wa8730a012g000970	1.20604	9.94205e-25	1.38612e-20	0.559	0.297	AT1G22530 AT4G09160 AT1G72160	PATL2	PATELLIN 2 SEC14 cytosolic factor family protein / phosphoglyceride transfer family protein Sec14p-like phosphatidylinositol transfer family protein
Wa8730a017g003320	1.20509	4.46718e-33	6.22815e-29	0.433	0.152	AT5G53750		CBS domain-containing protein
Wa8730a015g000860	1.20416	3.00074e-50	4.18363e-46	0.796	0.371	AT5G48070 AT2G18800 AT4G30270 AT4G25810 AT5G57550	ATXTH20, XTH20 ATXTH21, XTH21 MERI-5, MERI5B, SEN4, XTH24 XTH23, XTR6 XTH25, XTR3	putative xyloglucan endotransglycosylase/hydrolase, expressed primarily in the stele of mature non-elongating regions of both the main and the lateral root. Is expressed in lateral root primordia but expression ceases after lateral root begins to grow. xyloglucan endotransglucosylase/hydrolase 21 encodes a protein similar to endo xyloglucan transferase in sequence. It is also very similar to BRU1…
Wa8730a016g001520	1.20116	1.11096e-09	1.54889e-05	0.504	0.358	AT1G35140 AT5G64260 AT5G09440 AT4G08950	EXL1, PHI-1 EXL2 EXL4 EXO	At1g35140 (At1g35140/T32G9_32) mRNA, complete cds EXORDIUM like 2 EXORDIUM like 4 Phosphate-responsive 1 family protein
Wa8730a014g005520	1.19803	2.3091e-11	3.21935e-07	0.489	0.327	AT2G17730 AT4G35840 AT5G66070	NIP2	Intrinsic thylakoid membrane protein that fixes RPOTmp on the stromal side of the thylakoid membrane. RING/U-box superfamily protein RING/U-box superfamily protein
Wa8730a014g006110	1.19264	6.37596e-30	8.88937e-26	0.459	0.192	AT1G14370 AT4G35600 AT2G17220 AT3G55450 AT1G76360 AT1G18160 AT5G03320	APK2A, Kin1, PBL2 CST, CX32, Kin4 Kin3 PBL1	Encodes protein kinase APK2a. plant-type connexin (gap junction-type protein), a component of plasmodesmata Encodes a putative serine/threonine-specific protein kinase kin3. Protein is N-myristoylated. PBS1-like 1 Protein kinase superfamily protein Protein kinase superfamily protein Protein kinase superfamily protein
Wa8730a015g001540	1.19105	1.31352e-11	1.83131e-07	0.419	0.279	AT4G30210	AR2, ATR2	Encodes NADPH-cytochrome P450 reductase that catalyzes the first oxidative step of the phenylpropanoid general pathway.
Wa8730a005g006560	1.18937	6.9784e-35	9.72928e-31	0.367	0.115
Wa8730a011g002140	1.18664	3.12168e-28	4.35225e-24	0.396	0.155	AT2G44710		RNA-binding (RRM/RBD/RNP motifs) family protein
Wa8730a002g004470	1.18434	1.02693e-32	1.43175e-28	0.474	0.196	AT1G20110		Encodes a protein that is localized to the peripheral membrane of late endosomal compartments. Involved in the regulation of mulitivesicular/prevacuolar compartment protein sorting. Loss of function mutations are embryo lethal. Regulates IRT1-dependent metal transport and metal homeostasis. The mRNA is cell-to-cell mobile.
Wa8730a012g004840	1.18415	2.46431e-38	3.43575e-34	0.441	0.148	AT1G78080 AT1G22190 AT2G22200 AT4G39780 AT5G65130 AT1G36060	AtWIND1, RAP2.4, WIND1 RAP2.4	Encodes a member of the DREB subfamily A-6 of ERF/AP2 transcription factor family (RAP2.4). The protein contains one AP2 domain. Role in mediating light and ethylene signaling. The gene encodes a putative transcription factor belongings to the abiotic stress-associated DREB A-6 clade. The mRNA is cell-to-cell mobile. encodes a member of the DREB subfamily A-6 of ERF/AP2 transcription factor famil…
Wa8730a007g007570	1.18344	6.18815e-35	8.62752e-31	0.381	0.116	AT1G43670	AtcFBP, FBP, FINS1	Encodes a fructose-1,6-bisphosphatase. This enzyme, in addition to catalyzing the formation of fructose-6-phosphate for sucrose biosynthesis, appears to play a role in fructose-mediated signaling that is independent of its enzymatic activity. atcfbp-1/fins1 mutants have reduced photosynthetic rates, elevated levels of starch and reduced levels of sucrose during the day. Although the protein is ex…
Wa8730a007g004310	1.18063	4.88565e-41	6.81157e-37	0.256	0.048
Wa8730a002g000190	1.18035	8.06734e-23	1.12475e-18	0.274	0.091	AT4G28220 AT4G05020 AT4G21490 AT2G20800	NDB1 NDB2 NDB3 NDB4	NAD(P)H dehydrogenase B1 NAD(P)H dehydrogenase B2 NAD(P)H dehydrogenase B3 NAD(P)H dehydrogenase B4
Wa8730a005g004220	1.17952	1.0422e-30	1.45304e-26	0.27	0.068	AT4G01070 AT1G01420 AT5G26310	GT72B1, UGT72B1 UGT72B3 UGT72E3	the glycosyltransferase (UGT72B1) is involved in metabolizing xenobiotica (chloroaniline and chlorophenole). Comparison between wild type and knock-out mutant demonstrates the central role of this gene for metabolizing chloroaniline but significantly less for chlorophenole. The glucosyltransferase preferred UDP-xylose over UDP-glucose indicating its (additional) functioning as a xylosyltransferas…
Wa8730a004g008240	1.17934	2.24766e-27	3.13368e-23	0.493	0.227
Wa8730a012g001880	1.17811	9.62272e-30	1.3416e-25	0.385	0.14	AT4G09150 AT1G22930		T-complex protein 11 T-complex protein 11
Wa8730a012g004660	1.17185	1.55736e-14	2.17127e-10	0.307	0.145
Wa8730a015g000790	1.16755	4.62953e-29	6.4545e-25	0.574	0.27	AT5G48070 AT2G18800 AT4G30270 AT4G25810 AT5G57550	ATXTH20, XTH20 ATXTH21, XTH21 MERI-5, MERI5B, SEN4, XTH24 XTH23, XTR6 XTH25, XTR3	putative xyloglucan endotransglycosylase/hydrolase, expressed primarily in the stele of mature non-elongating regions of both the main and the lateral root. Is expressed in lateral root primordia but expression ceases after lateral root begins to grow. xyloglucan endotransglucosylase/hydrolase 21 encodes a protein similar to endo xyloglucan transferase in sequence. It is also very similar to BRU1…
Wa8730a011g003700	1.16448	4.83571e-19	6.74195e-15	0.604	0.408
Wa8730a013g002640	1.16301	1.02647e-46	1.4311e-42	0.196	0.023	AT5G24470 AT2G46790	APRR5, PRR5 APRR9, PRR9, TL1	Encodes a pseudo-response regulator whose mutation affects various circadian-associated biological events such as flowering time in the long-day photoperiod conditions, red light sensitivity of seedlings during early photomorphogenesis, and the period of free-running rhythms of certain clock-controlled genes including CCA1 and APRR1/TOC1 in constant white light. Acts as transcriptional repressor …
Wa8730a011g002170	1.16041	5.8626e-57	8.17363e-53	0.248	0.031
Wa8730a002g008420	1.1567	5.61839e-55	7.83317e-51	0.274	0.041	AT5G60760		P-loop containing nucleoside triphosphate hydrolases superfamily protein
Wa8730a003g004130	1.15576	1.88933e-32	2.6341e-28	0.311	0.085	AT5G11420 AT2G41810 AT3G08030		Protein of unknown function, DUF642 Protein of unknown function, DUF642 The mRNA of this gene is expressed in viable seeds. Its detection in a dry seed lot has potential for use as a molecular marker for germination performance as absence of expression correlates with decreased germination.
Wa8730a004g003140	1.15404	1.98397e-59	2.76605e-55	0.259	0.032
Wa8730a010g006350	1.15159	3.29399e-19	4.59248e-15	0.33	0.136	AT5G57610		Protein kinase superfamily protein with octicosapeptide/Phox/Bem1p domain
Wa8730a004g000030	1.15066	3.55121e-45	4.95109e-41	0.237	0.037	AT1G23290 AT1G70600	RPL27A, RPL27AB	Encodes a ribosomal protein L27A, a constituent of the large subunit of the ribosomal complex. Regulated by TCP20. Ribosomal protein L18e/L15 superfamily protein
Wa8730a005g001700	1.14861	3.71709e-23	5.18237e-19	0.519	0.276	AT4G36700		RmlC-like cupins superfamily protein
Wa8730a013g001000	1.14598	4.33003e-33	6.03693e-29	0.259	0.061
Wa8730a001g002860	1.14297	9.48932e-13	1.323e-08	0.263	0.122	AT3G05410		Photosystem II reaction center PsbP family protein
Wa8730a008g005120	1.1373	1.5929e-47	2.22082e-43	0.959	0.882	AT4G05320	UBI10, UBQ10	One of five polyubiquitin genes in A. thaliana. These genes encode the highly conserved 76-amino acid protein ubiquitin that is covalently attached to substrate proteins targeting most for degradation. Polyubiquitin genes are characterized by the presence of tandem repeats of the 228 bp that encode a ubiquitin monomer. Induced by salicylic acid. Independent of NPR1 for their induction by salicyli…
Wa8730a006g006910	1.13664	1.12069e-34	1.56247e-30	0.148	0.018	AT1G72830 AT1G54160 AT3G14020 AT1G17590 AT3G20910	ATHAP2C, HAP2C, NF-YA3 NF-YA5, NFYA5 NF-YA6 NF-YA8 NF-YA9	Encodes a subunit of CCAAT-binding complex, binds to CCAAT box motif present in some plant promoter sequences. One of three members of this class (HAP2A, HAP2B, HAP2C), it is expressed in vegetative and reproductive tissues. Encodes a member of the CCAAT-binding transcription factor (CBF-B/NF-YA) family. Expression is upregulated in response to ABA and drought. This regulation appears to be media…
Wa8730a007g000380	1.13263	4.77463e-25	6.65679e-21	0.681	0.418	AT3G44260 AT5G22250	AtCAF1a, CAF1a AtCAF1b, CAF1b	Encodes one of the homologs of the yeast CCR4-associated factor 1: AT3G44260 (CAF1a), AT5G22250 (CAF1b). Has mRNA deadenylation activity. Also plays a role in plant defense responses. Encodes one of the homologs of the yeast CCR4-associated factor 1: AT3G44260 (CAF1a), AT5G22250 (CAF1b). Has mRNA deadenylation activity. Also plays a role in plant defense responses.
Wa8730a003g008350	1.12116	3.96439e-37	5.52715e-33	0.378	0.114	AT3G13445	TBP1, TFIID-1	TBP (TATA binding protein) associates with TAF(II)s (TBP-associated factors) to form the TFIID general transcription factor complex
Wa8730a015g001570	1.1207	2.85089e-07	0.00397472	0.463	0.351	AT5G48540		receptor-like protein kinase-related family protein
Wa8730a002g001840	1.11824	8.50001e-21	1.18507e-16	0.526	0.3	AT4G39090 AT3G49340 AT2G21430	RD19, RD19A	Similar to cysteine proteinases, induced by desiccation but not abscisic acid. Required for RRS1-R mediated resistance against Ralstonia solanacearum. Interacts with the R. solanacearum type III effector PopP2. RD19 associates with PopP2 to form a nuclear complex that is required for activation of the RRS1-Rmediated resistance response. Cysteine proteinases superfamily protein Papain family cyste…
Wa8730a004g005340	1.11814	4.66989e-18	6.51075e-14	0.196	0.059	AT4G39210 AT2G21590	APL3 APL4	Encodes the large subunit of ADP-Glucose Pyrophosphorylase which catalyzes the first, rate limiting step in starch biosynthesis. The large subunit plays a regulatory role whereas the small subunit (ApS) is the catalytic isoform. Four isoforms (ApL1-4) have been identified. ApL3 is the major large subunit isoform present in inflorescences, fruits and roots. Encodes the large subunit of ADP-glucose…
Wa8730a001g003900	1.1132	6.49294e-17	9.05246e-13	0.359	0.171	AT3G16850 AT3G62110 AT3G06770 AT5G49215		Pectin lyase-like superfamily protein Pectin lyase-like superfamily protein Pectin lyase-like superfamily protein Pectin lyase-like superfamily protein
Wa8730a020g001280	1.1124	2.38238e-20	3.32152e-16	0.4	0.176	AT3G27170	ATCLC-B, CLC-B	member of Anion channel protein family
Wa8730a007g001880	1.1096	5.75746e-23	8.02705e-19	0.322	0.119	AT1G48090		calcium-dependent lipid-binding family protein
Wa8730a004g007970	1.10623	4.71296e-21	6.57081e-17	0.278	0.099	AT1G03930 AT3G23340 AT5G57015 AT1G72710 AT2G19470 AT4G28540 AT5G44100	ADK1, CKL9ALPHA, CKL9BETA ckl10 ckl12 CKL2 ckl5 CKL6, PAPK1 ckl7	Phosphorylates serine, threonine, and tyrosine casein kinase I-like 10 casein kinase I-like 12 Encodes a member of the casein kinase 1 protein family that is localized to the cytoplasm and nucleus. casein kinase I-like 5 casein kinase I-like 6 casein kinase I-like 7
Wa8730a008g005490	1.09886	1.87547e-13	2.61477e-09	0.359	0.197
Wa8730a012g003880	1.09583	1.81457e-21	2.52987e-17	0.33	0.131
Wa8730a005g004230	1.09418	7.49165e-45	1.04449e-40	0.256	0.043	AT1G64350	SEH1H	seh1-like protein
Wa8730a014g000630	1.09212	9.59773e-35	1.33811e-30	0.844	0.529
Wa8730a007g003230	1.09157	1.45663e-39	2.03084e-35	0.219	0.036	AT5G41100 AT2G33490 AT3G26910		hydroxyproline-rich glycoprotein family protein hydroxyproline-rich glycoprotein family protein
Wa8730a011g000990	1.08483	8.82643e-32	1.23058e-27	0.704	0.382	AT4G18780 AT5G16910 AT3G03050 AT1G32180	ATCESA8, CESA8, IRX1, LEW2 ATCSLD2, CSLD2 ATCSLD3, CSLD3, KJK, RHD7 ATCSLD6, CSLD6	Encodes a member of the cellulose synthase family involved in secondary cell wall biosynthesis. Mutants have abnormal xylem formation, reduced cellulose content, and enhanced drought and osmotic stress tolerance. Mediates resistance towards bacterial pathogens via ABA. Confers resistance towards bacterial and fungal pathogens, independent of salicylic acid, ethylene and jasmonate signaling. encod…
Wa8730a008g005630	1.08236	3.1708e-15	4.42072e-11	0.485	0.301	AT3G13200	EMB2769	Cwf15 / Cwc15 cell cycle control family protein
Wa8730a008g005980	1.08133	3.7753e-39	5.26352e-35	0.285	0.063	AT1G61140 AT1G11100 AT1G50410	EDA16	SNF2 domain-containing protein / helicase domain-containing protein / zinc finger protein-related SNF2 domain-containing protein / helicase domain-containing protein / zinc finger protein-related Encodes a member of the SNF2 family of helicase-like proteins and is involved in RNA-directed DNA methylation. It is functionally redundant with FRG1.
Wa8730a010g004450	1.08096	3.96013e-16	5.52121e-12	0.359	0.171
Wa8730a001g002460	1.0778	1.17193e-19	1.6339e-15	0.215	0.066	AT3G63120 AT3G60550 AT3G05327	CYCP1 1 CYCP3 2	cyclin p1 1 cyclin p3 2 Cyclin family protein
Wa8730a016g004470	1.06641	1.15538e-11	1.61083e-07	0.537	0.399	AT1G60420	AtNRX1, NRX1	Reduce transmission through pollen.
Wa8730a006g002200	1.05908	4.53278e-25	6.31961e-21	0.563	0.306	AT5G63130 AT3G26510		Octicosapeptide/Phox/Bem1p family protein Octicosapeptide/Phox/Bem1p family protein
Wa8730a012g001940	1.05889	2.09531e-43	2.92128e-39	0.219	0.032	AT2G31600 AT1G05860
Wa8730a012g002120	1.05848	6.39588e-20	8.91713e-16	0.304	0.119	AT5G05070 AT3G48760 AT5G50020 AT3G26935 AT4G24630 AT5G41060		DHHC-type zinc finger family protein DHHC-type zinc finger family protein DHHC-type zinc finger family protein DHHC-type zinc finger family protein DHHC-type zinc finger family protein DHHC-type zinc finger family protein
Wa8730a010g004760	1.05831	8.52614e-08	0.00118871	0.319	0.202
Wa8730a006g000980	1.05544	1.24114e-27	1.7304e-23	0.533	0.235	AT3G22120 AT4G15160 AT1G62500	CWLP	cell wall-plasma membrane linker protein homolog (CWLP) Bifunctional inhibitor/lipid-transfer protein/seed storage 2S albumin superfamily protein Bifunctional inhibitor/lipid-transfer protein/seed storage 2S albumin superfamily protein
Wa8730a016g001560	1.04517	8.8256e-11	1.23046e-06	0.604	0.457	AT1G35140 AT5G64260 AT5G09440 AT4G08950	EXL1, PHI-1 EXL2 EXL4 EXO	At1g35140 (At1g35140/T32G9_32) mRNA, complete cds EXORDIUM like 2 EXORDIUM like 4 Phosphate-responsive 1 family protein
Wa8730a014g000910	1.0449	9.23628e-22	1.28772e-17	0.47	0.232	AT5G67450 AT3G19580 AT5G43170 AT1G27730 AT2G28710 AT3G49930 AT1G49900	AZF1, ZF1 AZF2, ZF2 AZF3, ZF3 STZ, ZAT10	Encodes zinc-finger protein. mRNA levels are elevated in response to low temperature, cold temperatures and high salt. The protein is localized to the nucleus and acts as a transcriptional repressor. Encodes zinc finger protein. mRNA levels are upregulated in response to ABA, high salt, and mild dessication. The protein is localized to the nucleus and acts as a transcriptional repressor. Encodes …
Wa8730a001g007240	1.04411	6.57405e-25	9.16554e-21	0.519	0.242	AT3G10320 AT2G41640 AT3G57380		MUCI21 is a GT61 protein required for the production of highly branched xylan in seed coat mucilage. MUCI21 likely decorates xylan with xylose side chains that seem to be necessary for pectin attachment to the seed surface. Glycosyltransferase family 61 protein Glycosyltransferase family 61 protein
Wa8730a018g002050	1.04355	4.66756e-18	6.50751e-14	0.378	0.183	AT2G40950 AT3G10800 AT3G56660	BZIP17 BZIP28 BZIP49	bZIP17 appears to regulate transcription as part of a salt and osmotic stress response. zip17 mutants show enhanced inhibition of primary root elongation in response to NaCl. Several salt-responsive genes, such as ATHB-7 show a reduced transcriptional response to a salt treatment in zip17 mutant seedlings. myc:bZIP17 undergoes proteolytic processing in salt-treated wild type seedlings, but not in…
Wa8730a017g003240	1.0408	4.83002e-36	6.73402e-32	0.248	0.052	AT5G23130		Peptidoglycan-binding LysM domain-containing protein
Wa8730a017g000450	1.03918	4.90035e-30	6.83207e-26	0.219	0.047	AT5G18070	DRT101	encodes a novel protein involved in DNA repair from UV damage. Isolated by functional complementation of E. coli UV-sensitive mutants (UVR genes).
Wa8730a009g000500	1.03871	2.76992e-16	3.86183e-12	0.426	0.236	AT1G07470 AT5G59230		Transcription factor IIA, alpha/beta subunit transcription factor-related
Wa8730a005g006050	1.02504	8.64355e-41	1.20508e-36	0.215	0.033	AT1G16905 AT1G78830		Curculin-like (mannose-binding) lectin family protein Curculin-like (mannose-binding) lectin family protein
Wa8730a010g005150	1.01946	1.5396e-24	2.14651e-20	0.37	0.144
Wa8730a006g002540	1.01875	1.625e-18	2.26558e-14	0.27	0.1	AT4G13630 AT1G04890		Protein of unknown function, DUF593 Protein of unknown function, DUF593
Wa8730a001g004510	1.01609	7.05781e-50	9.84e-46	0.23	0.031	AT1G56570 AT4G20760 AT5G37570 AT5G04780	PGN	Encodes a mitochondria-localized pentatricopeptide repeat protein PGN. Functions in defense against necrotrophic fungi and abiotic stress tolerance. NAD(P)-binding Rossmann-fold superfamily protein Pentatricopeptide repeat (PPR-like) superfamily protein Pentatricopeptide repeat (PPR) superfamily protein
Wa8730a010g005110	1.015	3.7641e-24	5.2479e-20	0.226	0.06	AT5G55230 AT4G26760	ATMAP65-1, MAP65-1 MAP65-2	Binds and bundles microtubules. Plays a role in stabilizing anti-parallel microtubules in the central spindle at anaphase to early cytokinesis but is not essential at the midline of the phragmoplast at later stages. The timing with which the MAP65-1 was targeted to the spindle appears to be regulated by a phosphorylation sensitive switch. Enhances microtubule polymerization, promotes nucleation a…
Wa8730a009g000640	1.01052	3.02137e-18	4.2124e-14	0.263	0.098	AT4G00900 AT1G07670	ATECA2, ECA2 ATECA4, ECA4	Type IIA (SERCA-type) Ca2+ ATPase, catalyzes the efflux of calcium from the cytoplasm. endomembrane-type CA-ATPase 4
Wa8730a017g003160	1.00923	6.71531e-16	9.36249e-12	0.419	0.229
Wa8730a012g001640	1.00851	2.27464e-12	3.1713e-08	0.226	0.097	AT1G05640 AT2G31820		Ankyrin repeat family protein Ankyrin repeat family protein
Wa8730a006g001210	1.00786	7.36425e-18	1.02672e-13	0.311	0.126	AT2G32210 AT3G22240
Wa8730a009g000420	1.00737	3.15553e-18	4.39943e-14	0.248	0.088	AT3G20320	ABCI15, TGD2	Encodes a permease-like component of an ABC transporter involved in lipid transfer from ER to chloroplast. A phosphatidic acid-binding protein with a predicted mycobacterial cell entry domain. It is tethered to the inner chloroplast envelope membrane facing the outer envelope membrane. Presumed bacterial orthologs of TGD1 and TGD2 in Gram-negative bacteria are typically organized in transcription…
Wa8730a002g009470	1.00727	2.7784e-24	3.87364e-20	0.507	0.254	AT5G18930	BUD2, SAMDC4	Adenosylmethionine decarboxylase family protein
Wa8730a004g001380	1.00332	5.71673e-44	7.97027e-40	0.207	0.029	AT4G27900 AT5G53420		CCT motif family protein CCT motif family protein
Wa8730a008g001890	1.00305	1.12309e-23	1.56581e-19	0.274	0.087	AT4G34870 AT5G67530	ATCYP1, ROC5 ATPUB49, PUB49	belongs to cyclophilin family plant U-box 49
Wa8730a002g008080	1.00291	6.41548e-27	8.94446e-23	0.319	0.105	AT2G27950 AT5G04460		Ring/U-Box superfamily protein RING/U-box superfamily protein
Wa8730a005g002880	1.00215	4.56674e-19	6.36695e-15	0.196	0.057	AT2G19900 AT5G11670 AT5G25880 AT1G79750	ATNADP-ME1, NADP-ME1 ATNADP-ME2, NADP-ME2 ATNADP-ME3, NADP-ME3 ATNADP-ME4, NADP-ME4	The malic enzyme (EC 1.1.1.40) encoded by AtNADP-ME1 is expressed in response to developmental and cell-specific signals. The enzyme is active in vitro and appears to function as a homohexamer or homooctamer. It is believed to be a cytosolic protein. The malic enzyme (EC 1.1.1.40) encoded by AtNADP-ME2 is presumably a cytosolic enzyme involved in malate metabolism and possibly assisting the oxida…
Wa8730a004g005440	1.00044	5.05779e-14	7.05157e-10	0.219	0.085

## Sheet: Dusk C7 DEGs
Dataset S4. Differentially Expressed Genes for Dusk Cluster 7
Genes showing significant differential expression (log2FC>1 & p_val_adj <0.05 & PCT1 > 10%) in the given cluster versus all other cells in the dataset
PCT1: Percentage of cells within the cluster expressing the gene
PCT2: Percentage of cells outside the cluster expressing the gene
Gene	Ave. Log2 FC	p Value	p Value Adj.	PCT1	PCT2	Arabidopsis orthologues	Arabidopsis gene names	Arabidopsis gene description
Wa8730a008g003430	4.8983	4.09039e-170	5.70282e-166	0.813	0.111
Wa8730a009g004870	4.82995	9.70577e-121	1.35318e-116	0.412	0.029
Wa8730a002g004080	3.87604	3.17697e-14	4.42933e-10	0.137	0.031	AT1G75930 AT5G37690 AT5G41890 AT4G16230 AT1G20120	EXL6	member of Lipase proteins SGNH hydrolase-type esterase superfamily protein GDSL-motif esterase/acyltransferase/lipase. Enzyme group with broad substrate specificity that may catalyze acyltransfer or hydrolase reactions with lipid and non-lipid substrates. GDSL-motif esterase/acyltransferase/lipase. Enzyme group with broad substrate specificity that may catalyze acyltransfer or hydrolase reactions…
Wa8730a005g001350	3.43164	1.37373e-115	1.91526e-111	0.44	0.036	AT4G32320 AT1G14540 AT1G71695 AT1G68850 AT5G19890 AT2G37130 AT1G44970 AT4G36430 AT1G49570	APX6 PER4	Encodes a cytosolic ascorbate peroxidase APX6. Ascorbate peroxidases are enzymes that scavenge hydrogen peroxide in plant cells. Eight types of APX have been described for Arabidopsis: three cytosolic (APX1, APX2, APX6), two chloroplastic types (stromal sAPX, thylakoid tAPX), and three microsomal (APX3, APX4, APX5) isoforms. Peroxidase superfamily protein Peroxidase superfamily protein Peroxidase…
Wa8730a009g004900	3.42138	2.12858e-105	2.96767e-101	0.231	0.006
Wa8730a009g005650	3.15814	5.92927e-102	8.26659e-98	0.945	0.364	AT1G27350		Ribosome associated membrane protein RAMP4
Wa8730a008g004660	2.87463	1.11397e-66	1.5531e-62	0.473	0.083
Wa8730a016g000410	2.85109	3.44929e-94	4.80899e-90	0.522	0.073
Wa8730a007g002980	2.45893	3.52796e-06	0.0491868	0.225	0.123
Wa8730a013g003600	2.42914	8.95811e-16	1.24894e-11	0.104	0.017	AT2G02147	LCR73	Encodes a member of a family of small,secreted, cysteine rich protein with sequence similarity to the PCP (pollen coat protein) gene family.
Wa8730a006g005060	2.24676	4.17095e-93	5.81515e-89	0.896	0.262	AT5G15290 AT1G14160	CASP5	Uncharacterised protein family (UPF0497) Uncharacterised protein family (UPF0497)
Wa8730a008g000650	2.07617	2.28882e-83	3.19107e-79	0.995	0.681
Wa8730a015g003690	1.99562	1.23152e-82	1.71698e-78	0.692	0.156	AT3G07680	p24beta2	Encodes an Golgi-localized p24 protein. Interacts with p24delta5 at ER export sites for ER exit and coupled transport to the Golgi apparatus. The mRNA is cell-to-cell mobile.
Wa8730a003g005060	1.93871	1.14894e-51	1.60185e-47	0.516	0.127	AT1G68530 AT1G25450 AT2G26640 AT4G34510 AT5G43760 AT1G19440	CER6, CUT1, G2, KCS6, POP1 CER60, KCS5 KCS11 KCS17 KCS20 KCS4	Encodes KCS6, a member of the 3-ketoacyl-CoA synthase family involved in the biosynthesis of VLCFA (very long chain fatty acids). Encodes KCS5, a member of the 3-ketoacyl-CoA synthase family involved in the biosynthesis of VLCFA (very long chain fatty acids). Encodes KCS11, a member of the 3-ketoacyl-CoA synthase family involved in the biosynthesis of VLCFA (very long chain fatty acids). Encodes …
Wa8730a009g003660	1.88827	2.16345e-17	3.01628e-13	0.643	0.36	AT2G38530	LP2, LTP2, cdf3	Involved in lipid transfer between membranes. Belongs to a family of Lipid transfer proteins. Sequence similarity to other plant/Arabidopsis LPT genes but highest similarity to LPT1. Stress and pathogen-inducible motifs found in the upstream region. Expressed in flower, leaves and siliques but absent in roots. Predicted to be a member of PR-14 pathogenesis-related protein family with the followin…
Wa8730a016g001400	1.85422	1.90351e-68	2.65387e-64	0.857	0.31
Wa8730a012g005240	1.83424	9.26226e-89	1.29134e-84	0.527	0.079	AT3G28910 AT1G74650 AT4G12350 AT1G08810 AT3G47600	ATMYB30, MYB30 ATMYB31, ATY13, MYB31 AtMYB42, MYB42 AtMYB60, MYB60 ATMYB94, ATMYBCP70, MYB94	transcription factor myb homologue Member of the R2R3 factor gene family. Encodes a putative transcription factor (MYB42). putative transcription factor of the R2R3-MYB gene family. Transcript increases under conditions that promote stomatal opening (white and blue light, abi1-1 mutation) and decreases under conditions that trigger stomatal closure (ABA, desiccation, darkness), with the exception…
Wa8730a001g012110	1.78695	6.77228e-62	9.44192e-58	0.302	0.033	AT3G54040		PAR1 protein
Wa8730a001g000420	1.77024	6.4957e-60	9.0563e-56	0.687	0.217	AT3G05970 AT2G47240 AT1G64400	ATLACS6, LACS6 CER8, LACS1 LACS3	encode peroxisomal long-chain acyl-CoA synthetase (LACS) isozymes Encodes an acyl-CoA synthetase that acts on long-chain and very-long-chain fatty acids, involved in cuticular wax and cutin biosynthesis AMP-dependent synthetase and ligase family protein
Wa8730a005g008830	1.74258	7.74368e-45	1.07962e-40	0.852	0.436	AT1G30020		Protein of unknown function, DUF538
Wa8730a009g001730	1.73442	1.48768e-59	2.07413e-55	0.868	0.327	AT2G41290 AT1G08470 AT3G57030 AT3G51440	SSL2 SSL3	Although this enzyme is predicted to encode a strictosidine synthase (SS), it lacks a conserved catalytic glutamate residue found in active SS enzymes and it is not expected to have SS activity. Although this enzyme is predicted to encode a strictosidine synthase (SS), it lacks a conserved catalytic glutamate residue found in active SS enzymes and it is not expected to have SS activity. Calcium-d…
Wa8730a006g006410	1.71824	2.76455e-53	3.85433e-49	0.753	0.292	AT1G21900	p24delta5	Encodes an ER-localized p24 protein. Interacts with p24beta2 at ER export sites for ER exit and coupled transport to the Golgi apparatus. Once in the Golgi, p24delta5 interacts very efficiently with the COPI machinery for retrograde transport back to the ER.
Wa8730a016g003000	1.70294	3.57475e-46	4.98392e-42	0.857	0.429	AT1G68530 AT1G25450 AT2G26640 AT1G19440 AT1G71160	CER6, CUT1, G2, KCS6, POP1 CER60, KCS5 KCS11 KCS4 KCS7	Encodes KCS6, a member of the 3-ketoacyl-CoA synthase family involved in the biosynthesis of VLCFA (very long chain fatty acids). Encodes KCS5, a member of the 3-ketoacyl-CoA synthase family involved in the biosynthesis of VLCFA (very long chain fatty acids). Encodes KCS11, a member of the 3-ketoacyl-CoA synthase family involved in the biosynthesis of VLCFA (very long chain fatty acids). Encodes …
Wa8730a009g001610	1.6919	5.79822e-29	8.08387e-25	0.632	0.285	AT5G59320	LTP3	Predicted to encode a PR (pathogenesis-related) protein. Belongs to the lipid transfer protein (PR-14) family with the following members: At2g38540/LTP1, At2g38530/LTP2, At5g59320/LTP3, At5g59310/LTP4, At3g51600/LTP5, At3g08770/LTP6, At2g15050/LTP7, At2g18370/LTP8, At2g15325/LTP9, At5g01870/LTP10, At4g33355/LTP11, At3g51590/LTP12, At5g44265/LTP13, At5g62065/LTP14, At4g08530/LTP15.
Wa8730a010g003880	1.61442	9.06194e-20	1.26342e-15	0.159	0.03	AT5G38970	ATBR6OX, BR6OX, BR6OX1, CYP85A1	Encodes a polypeptide involved in the C-6 oxidation of brassinosteroids. Heterologous expression of the protein in yeast conferred the ability to catalyze multiple reactions in which the C-6 position of 6-deoxocastasterone, 6-deoxotyphasterol, 3-dehydro-6-deoxoteasterone and 6-deoxoteasterone are oxidized.
Wa8730a020g001820	1.60413	2.45635e-63	3.42464e-59	0.951	0.601	AT1G22530	PATL2	PATELLIN 2
Wa8730a001g007340	1.60225	3.5164e-43	4.90256e-39	0.753	0.288	AT2G18800 AT2G06850 AT4G30270 AT4G14130 AT4G25810 AT5G57550	ATXTH21, XTH21 EXGT-A1, EXT, XTH4 MERI-5, MERI5B, SEN4, XTH24 XTH15, XTR7 XTH23, XTR6 XTH25, XTR3	xyloglucan endotransglucosylase/hydrolase 21 endoxyloglucan transferase (EXGT-A1) gene encodes a protein similar to endo xyloglucan transferase in sequence. It is also very similar to BRU1 in soybean, which is involved in brassinosteroid response. xyloglucan endotransglycosylase-related protein (XTR7) xyloglucan endotransglycosylase-related protein (XTR6) xyloglucan endotransglycosylase-related p…
Wa8730a016g001530	1.55826	2.69525e-59	3.75771e-55	0.341	0.045	AT1G35140 AT5G64260 AT5G09440 AT4G08950	EXL1, PHI-1 EXL2 EXL4 EXO	At1g35140 (At1g35140/T32G9_32) mRNA, complete cds EXORDIUM like 2 EXORDIUM like 4 Phosphate-responsive 1 family protein
Wa8730a015g005520	1.55579	5.06572e-39	7.06263e-35	0.615	0.209
Wa8730a014g006440	1.55355	6.11182e-30	8.5211e-26	0.533	0.209	AT5G28540	BIP1	Encodes the luminal binding protein BiP, an ER-localized member of the HSP70 family. BiP is composed of an N-terminal ATP binding domain and a C-terminal domain that binds to hydrophobic patches on improperly/incompletely folded proteins in an ATP-dependent manner. Involved in polar nuclei fusion during proliferation of endosperm nuclei.
Wa8730a020g003070	1.54474	2.56543e-31	3.57673e-27	0.67	0.312	AT3G26690 AT1G12880	ATNUDT13, ATNUDX13, NUDX13 NUDT12, atnudt12	Encodes AtNUDT13, a mitochondrial Nudix hydrolase specific for long-chain diadenosine polyphosphates. nudix hydrolase homolog 12
Wa8730a008g003960	1.50185	5.60002e-23	7.80754e-19	0.879	0.687
Wa8730a004g007740	1.49074	2.18139e-19	3.0413e-15	0.39	0.146	AT1G03870	FLA9	fasciclin-like arabinogalactan-protein 9 (Fla9)
Wa8730a007g000880	1.47631	1.20513e-11	1.68019e-07	0.549	0.349	AT3G53190 AT3G01270 AT3G27400 AT4G24780 AT1G67750 AT5G04310 AT5G63180 AT3G24670 AT5G48900 AT4G13710 AT1G04680		Pectin lyase-like superfamily protein Pectate lyase family protein Encodes a pectate lyase involved in response to nematodes. Encodes a pectate lyase involved in response to nematodes. Pectate lyase family protein Pectin lyase-like superfamily protein Pectin lyase-like superfamily protein Pectin lyase-like superfamily protein Pectin lyase-like superfamily protein Pectin lyase-like superfamily pro…
Wa8730a009g005630	1.43585	8.59438e-46	1.19823e-41	0.951	0.707
Wa8730a013g000840	1.42392	3.59859e-53	5.01715e-49	0.703	0.237
Wa8730a003g000890	1.41846	5.18186e-23	7.22456e-19	0.44	0.164	AT2G14580 AT3G19690 AT4G33720 AT1G50060 AT5G57625 AT4G31470 AT4G30320	ATPRB1, PRB1	pathogenesis related protein, encodes a basic PR1-like protein. Expresses in flowers, roots, and not in leaves and responses to ethylene and methyl jasmonate. Salicylic acid represses gene expression. CAP (Cysteine-rich secretory proteins, Antigen 5, and Pathogenesis-related 1 protein) superfamily protein CAP (Cysteine-rich secretory proteins, Antigen 5, and Pathogenesis-related 1 protein) superf…
Wa8730a010g004880	1.40054	4.59919e-48	6.41219e-44	0.852	0.396	AT5G55850 AT5G63270 AT5G40645	NOI	NOI protein RPM1-interacting protein 4 (RIN4) family protein RPM1-interacting protein 4 (RIN4) family protein
Wa8730a018g003650	1.39061	4.61419e-32	6.4331e-28	0.346	0.086	AT1G02390 AT4G01950	ATGPAT2, GPAT2 ATGPAT3, GPAT3	Encodes a member of a family of proteins with glycerol-3-phosphate acyltransferase activity. Encodes a member of a family of proteins with glycerol-3-phosphate acyltransferase activity.
Wa8730a016g002030	1.38474	1.54184e-40	2.14963e-36	0.824	0.43
Wa8730a009g001590	1.36993	7.24752e-33	1.01045e-28	0.94	0.641	AT3G55500 AT5G05290 AT5G39280 AT2G37640 AT2G28950 AT2G40610 AT5G02260	ATEXP16, ATEXPA16, ATHEXP, EXP16, EXPA16 ATEXP2, ATEXPA2, ATHEXP, EXP2, EXPA2 ATEXP23, ATEXPA23, ATHEXP, EXPA23 ATEXP3, ATEXPA3, ATHEXP, EXP3 ATEXP6, ATEXPA6, ATHEXP, EXPA6 ATEXP8, ATEXPA8, ATHEXP, EXP8, EXPA8 ATEXP9, ATEXPA9, ATHEXP, EXP9, EXPA9	expansin-like protein. Naming convention from the Expansin Working Group (Kende et al, 2004. Plant Mol Bio). Involved in the formation of nematode-induced syncytia in roots of Arabidopsis thaliana. Encodes an expansin. Naming convention from the Expansin Working Group (Kende et al, 2004. Plant Mol Bio) member of Alpha-Expansin Gene Family. Naming convention from the Expansin Working Group (Kende …
Wa8730a015g000890	1.34935	2.36082e-26	3.29145e-22	0.808	0.52	AT4G30290 AT5G48070 AT2G18800 AT4G25810 AT5G57550	ATXTH19, XTH19 ATXTH20, XTH20 ATXTH21, XTH21 XTH23, XTR6 XTH25, XTR3	Encodes a xyloglucan endotransglucosylase/hydrolase with only only the endotransglucosylase (XET EC 2.4.1.207) activity towards xyloglucan and non-detectable endohydrolytic (XEH EC 3.2.1.151) activity. Expressed throughout both the main and the lateral root, with intensive expression at the dividing and elongating regions. Is expressed in lateral root primordia but expression ceases after lateral…
Wa8730a019g001770	1.33359	1.01522e-39	1.41543e-35	0.835	0.407
Wa8730a009g000590	1.32997	3.14414e-43	4.38357e-39	0.758	0.328	AT2G38050 AT3G55360	ATDET2, DET2, DWF6 ATTSC13, CER10, ECR, TSC13	Similar to mammalian steroid-5-alpha-reductase. Involved in the brassinolide biosynthetic pathway. Enoyl-CoA reductase is involved in all very long chain fatty acids (VLCFA) elongation reactions that are required for cuticular wax, storage lipid and sphingolipid metabolism. The protein is located in the ER, but in contrast to its yeast homolog TSC13 is not particularly enriched in the nuclear env…
Wa8730a016g000330	1.31013	2.48704e-27	3.46743e-23	0.632	0.281	AT3G47710 AT1G26945	BHLH161, BNQ3 KDR, PRE6	BNQ3 belongs to a family of atypical non-DNA binding basic helix-loop-helix (bHLH) proteins that heterodimerize with and negatively regulate bHLH transcription factors. Directly and negatively regulated by AP3 and PI in petals. Required for appropriate regulation of flowering time.May also have a role in regulating light responses. Encodes a basic helix-loop-helix (bHLH) protein involved in blue/…
Wa8730a003g003400	1.30608	9.78975e-36	1.36489e-31	0.451	0.121	AT4G16442		Uncharacterised protein family (UPF0497)
Wa8730a006g006420	1.30012	1.45008e-72	2.0217e-68	0.456	0.069	AT1G21900	p24delta5	Encodes an ER-localized p24 protein. Interacts with p24beta2 at ER export sites for ER exit and coupled transport to the Golgi apparatus. Once in the Golgi, p24delta5 interacts very efficiently with the COPI machinery for retrograde transport back to the ER.
Wa8730a020g002750	1.29525	9.30763e-36	1.29767e-31	0.582	0.188	AT1G67730 AT1G24470	ATKCR1, KCR1, YBR159 ATKCR2, KCR2	Encodes one of the two Arabidopsis homologues to YBR159w encoding a S. cerevisiae beta-ketoacyl reductase (KCR), which catalyzes the first reduction during VLCFA (very long chain fatty acids, >18 carbon) elongation: KCR1 (At1g67730), KCR2 (At1g24470). Complementation of the yeast ybr159Delta mutant demonstrated that the two KCR proteins are divergent and that only AtKCR1 can restore heterologous …
Wa8730a014g001620	1.2946	5.91909e-13	8.25239e-09	0.346	0.149
Wa8730a008g003940	1.28556	3.65136e-27	5.09072e-23	0.978	0.982
Wa8730a006g003540	1.26938	9.20247e-36	1.28301e-31	0.599	0.226	AT3G01720 AT5G13500 AT2G25260
Wa8730a002g009950	1.26702	7.44735e-40	1.03831e-35	0.462	0.121	AT2G28630 AT5G04530	KCS12 KCS19	Encodes KCS12, a member of the 3-ketoacyl-CoA synthase family involved in the biosynthesis of VLCFA (very long chain fatty acids). Encodes KCS19, a member of the 3-ketoacyl-CoA synthase family involved in the biosynthesis of VLCFA (very long chain fatty acids).
Wa8730a004g007430	1.2547	1.82763e-35	2.54808e-31	0.918	0.632
Wa8730a013g004710	1.24811	1.33602e-36	1.86267e-32	0.797	0.392	AT5G43360 AT2G32830 AT3G54700	ATPT4, PHT1 3, PHT3 PHT1 5, PHT5 PHT1 7	Encodes Pht1 3, a member of the Pht1 family of phosphate transporters which include: Pht1 1/At5g43350, Pht1 2/At5g43370, Pht1 3/At5g43360, Pht1 4/At2g38940, Pht1 5/At2g32830, Pht1 6/At5g43340, Pht1 7/At3g54700, Pht1 8/At1g20860, Pht1 9/At1g76430 (Plant Journal 2002, 31:341). Encodes Pht1 5, a member of the Pht1 family of phosphate transporters which include: Pht1 1/At5g43350, Pht1 2/At5g43370, Ph…
Wa8730a004g007210	1.24629	1.15941e-26	1.61644e-22	0.604	0.278	AT5G45650 AT4G15040		subtilase family protein Subtilisin-like serine endopeptidase family protein
Wa8730a002g001530	1.22031	3.06872e-23	4.27841e-19	0.731	0.385	AT4G24130		Protein of unknown function, DUF538
Wa8730a007g003770	1.2194	5.91894e-42	8.25219e-38	0.874	0.437	AT1G78460		SOUL heme-binding family protein
Wa8730a003g007090	1.20238	4.34576e-33	6.05886e-29	0.648	0.292	AT3G22845		emp24/gp25L/p24 family/GOLD family protein
Wa8730a010g002380	1.20015	4.82123e-34	6.72176e-30	0.648	0.263	AT3G15050	IQD10	IQ-domain 10
Wa8730a020g002800	1.19415	8.00114e-39	1.11552e-34	0.396	0.093	AT1G67730 AT1G24470 AT5G65205	ATKCR1, KCR1, YBR159 ATKCR2, KCR2	Encodes one of the two Arabidopsis homologues to YBR159w encoding a S. cerevisiae beta-ketoacyl reductase (KCR), which catalyzes the first reduction during VLCFA (very long chain fatty acids, >18 carbon) elongation: KCR1 (At1g67730), KCR2 (At1g24470). Complementation of the yeast ybr159Delta mutant demonstrated that the two KCR proteins are divergent and that only AtKCR1 can restore heterologous …
Wa8730a009g004750	1.18598	7.6364e-38	1.06467e-33	0.511	0.157
Wa8730a001g007230	1.18457	2.73944e-34	3.81932e-30	0.797	0.446	AT4G31130		Protein of unknown function (DUF1218)
Wa8730a015g005150	1.17855	1.59062e-39	2.21764e-35	0.462	0.125
Wa8730a007g005460	1.17373	3.37442e-29	4.70462e-25	0.813	0.44
Wa8730a018g001030	1.1716	1.04452e-34	1.45627e-30	0.714	0.343	AT3G53370 AT3G09735 AT2G37120		S1FA-like DNA-binding protein S1FA-like DNA-binding protein S1FA-like DNA-binding protein
Wa8730a002g000620	1.15977	7.35924e-41	1.02603e-36	0.396	0.09	AT1G51460 AT3G53480	ABCG13 ABCG37, ATPDR9, PDR9, PIS1	ABCG13 encodes a member of the ATP-binding cassette (ABC) transporter family protein. Mutants show defects in petal elongation resulting in a folded petal phenotype. Negative regulator of auxin polar transport inhibitors. ABCG37 regulates auxin distribution and homeostasis in roots by excluding IBA from the root apex, but does not act directly in basipetal transport. ABCG37 and ABCG36 act redunda…
Wa8730a009g003530	1.15779	2.30699e-48	3.21641e-44	1	0.955	AT2G38530	LP2, LTP2, cdf3	Involved in lipid transfer between membranes. Belongs to a family of Lipid transfer proteins. Sequence similarity to other plant/Arabidopsis LPT genes but highest similarity to LPT1. Stress and pathogen-inducible motifs found in the upstream region. Expressed in flower, leaves and siliques but absent in roots. Predicted to be a member of PR-14 pathogenesis-related protein family with the followin…
Wa8730a003g005030	1.15109	7.99843e-25	1.11514e-20	0.505	0.205	AT5G62630 AT1G74790	HIPL2	hipl2 protein precursor catalytics
Wa8730a009g001970	1.14986	1.50043e-18	2.0919e-14	0.368	0.142	AT3G23600		alpha/beta-Hydrolases superfamily protein
Wa8730a007g003780	1.14545	3.59475e-36	5.0118e-32	0.819	0.41	AT1G78460		SOUL heme-binding family protein
Wa8730a015g005080	1.13658	4.62562e-31	6.44904e-27	0.588	0.206
Wa8730a015g002300	1.13588	4.4576e-35	6.21479e-31	0.813	0.424	AT5G13500 AT5G25265 AT2G25260
Wa8730a002g007680	1.13554	2.01186e-36	2.80494e-32	0.846	0.448	AT5G23760		Copper transport protein family
Wa8730a005g003530	1.13527	1.08793e-21	1.51679e-17	0.401	0.149	AT4G01250 AT5G52830 AT4G23550	AtWRKY22, WRKY22 ATWRKY27, WRKY27 ATWRKY29, WRKY29	member of WRKY Transcription Factor Group II-e Encodes a WRKY transcription factor WRKY27. Mutation in Arabidopsis WRKY27 results in delayed symptom development in response to the bacterial wilt pathogen Ralstonia solanacearum. Encodes WRKY DNA-binding protein 29 (WRKY29).
Wa8730a002g002980	1.12761	6.48679e-35	9.04389e-31	0.44	0.125	AT4G12390 AT1G23205 AT3G47380 AT1G62770 AT4G25260 AT5G62360	PME1	pectin methylesterase inhibitor 1 Plant invertase/pectin methylesterase inhibitor superfamily protein Plant invertase/pectin methylesterase inhibitor superfamily protein Plant invertase/pectin methylesterase inhibitor superfamily protein Plant invertase/pectin methylesterase inhibitor superfamily protein Plant invertase/pectin methylesterase inhibitor superfamily protein
Wa8730a002g005420	1.09839	2.92462e-26	4.0775e-22	0.725	0.404	AT5G24760 AT1G64710 AT1G32780 AT5G42250		GroES-like zinc-binding dehydrogenase family protein GroES-like zinc-binding dehydrogenase family protein GroES-like zinc-binding dehydrogenase family protein Zinc-binding alcohol dehydrogenase family protein
Wa8730a003g002920	1.092	4.23889e-36	5.90986e-32	0.346	0.077	AT1G26560	BGLU40	beta glucosidase 40
Wa8730a014g000700	1.0913	9.63741e-29	1.34365e-24	0.709	0.368	AT1G75110 AT1G19360	RRA2 RRA3	Encodes an arabinosyltransferase that modifies extensin proteins in root hair cells. Encodes an arabinosyltransferase that modifies extensin proteins in root hair cells.
Wa8730a010g005500	1.08085	7.35409e-43	1.02531e-38	0.319	0.056
Wa8730a002g004880	1.08048	2.31343e-45	3.22539e-41	0.995	0.909
Wa8730a010g001700	1.0789	3.27188e-18	4.56165e-14	0.33	0.118	AT5G53340		Encodes a hydroxyproline O-galactosyltransferase.
Wa8730a009g003160	1.07465	3.91648e-20	5.46036e-16	0.462	0.187
Wa8730a019g001620	1.07404	1.14109e-36	1.59091e-32	0.599	0.188	AT3G66658 AT1G44170	ALDH22A1 ALDH3H1, ALDH4	Encodes a putative aldehyde dehydrogenase. The gene is not responsive to osmotic stress and is expressed constitutively at a low level in plantlets and root cultures. Encodes a protein similar to the aldehyde dehydrogenase cp-ADH from C.plantagineum. Constitutively expressed at low levels.
Wa8730a010g006120	1.07062	5.84935e-26	8.15517e-22	0.445	0.16
Wa8730a010g004870	1.06571	2.17622e-23	3.03409e-19	0.604	0.282	AT5G48230	AACT2, ACAT2, EMB1276	Encodes an acetoacetyl-CoA thiolase that generates the bulk of the acetoacetyl-CoA precursor needed for the cytosolic localized, mevalonate-derived isoprenoids biosynthetic pathway. Loss-of-function mutants are embryo lethal.
Wa8730a016g002540	1.06483	6.81346e-30	9.49932e-26	0.665	0.288	AT1G65820		microsomal glutathione s-transferase, putative
Wa8730a009g002200	1.0592	9.49006e-27	1.3231e-22	0.478	0.165	AT3G05020 AT5G27200	ACP, ACP1 ACP5	encodes an acyl carrier protein expressed in leaves, roots, and dry seeds. Protein is not regulated by light. encodes an acyl carrier protein
Wa8730a008g001980	1.0485	3.58018e-06	0.0499148	0.121	0.046
Wa8730a002g000560	1.04757	8.68317e-24	1.21061e-19	0.379	0.126	AT3G52970	CYP76G1	member of CYP76G
Wa8730a006g004490	1.04735	2.71908e-35	3.79094e-31	0.769	0.351	AT1G24470	ATKCR2, KCR2	Encodes one of the two Arabidopsis homologues to YBR159w encoding a S. cerevisiae beta-ketoacyl reductase (KCR), which catalyzes the first reduction during VLCFA (very long chain fatty acids, >18 carbon) elongation: KCR1 (At1g67730), KCR2 (At1g24470). Complementation of the yeast ybr159Delta mutant demonstrated that the two KCR proteins are divergent and that only AtKCR1 can restore heterologous …
Wa8730a013g002080	1.04581	2.64428e-17	3.68665e-13	0.467	0.214	AT4G11820	FKP1, HMGS, MVA1	Encodes a protein with hydroxymethylglutaryl-CoA synthase activity which was characterized by phenotypical complementation of the S. cerevisiae mutant.
Wa8730a009g003340	1.03671	1.52628e-24	2.12795e-20	0.516	0.214	AT3G54180 AT2G38620 AT1G09600	CDC2B, CDKB1 1 CDKB1 2	Arabidopsis homolog of yeast cdc2, a protein kinase (cyclin-dependent kinase) that plays a central role in control of the mitotic cell cycle. Encodes a member of a plant specific family of cyclin dependent kinases. Protein kinase superfamily protein
Wa8730a007g005010	1.02399	1.2203e-21	1.70134e-17	0.665	0.324	AT1G09400		FMN-linked oxidoreductases superfamily protein
Wa8730a020g002780	1.01146	8.84893e-33	1.23372e-28	0.423	0.119	AT1G67730 AT1G24470	ATKCR1, KCR1, YBR159 ATKCR2, KCR2	Encodes one of the two Arabidopsis homologues to YBR159w encoding a S. cerevisiae beta-ketoacyl reductase (KCR), which catalyzes the first reduction during VLCFA (very long chain fatty acids, >18 carbon) elongation: KCR1 (At1g67730), KCR2 (At1g24470). Complementation of the yeast ybr159Delta mutant demonstrated that the two KCR proteins are divergent and that only AtKCR1 can restore heterologous …
Wa8730a002g010160	1.01088	2.7983e-32	3.90138e-28	0.286	0.059	AT3G23410 AT4G28570 AT1G03990 AT4G19380	ATFAO3, FAO3	Encodes a fatty alcohol oxidase. Long-chain fatty alcohol dehydrogenase family protein Long-chain fatty alcohol dehydrogenase family protein Long-chain fatty alcohol dehydrogenase family protein
Wa8730a003g006990	1.00994	8.6e-35	1.19901e-30	0.462	0.133	AT1G68530 AT2G26250 AT1G04220 AT1G19440	CER6, CUT1, G2, KCS6, POP1 FDH, KCS10 KCS2 KCS4	Encodes KCS6, a member of the 3-ketoacyl-CoA synthase family involved in the biosynthesis of VLCFA (very long chain fatty acids). epidermis-specific, encodes KCS10, a putative 3-ketoacyl-CoA synthase. probably involved in the synthesis of long-chain lipids found in the cuticle. Encodes KCS2, a member of the 3-ketoacyl-CoA synthase family involved in the biosynthesis of VLCFA (very long chain fatt…

## Sheet: Dusk C8 DEGs
Dataset S4. Differentially Expressed Genes for Dusk Cluster 8
Genes showing significant differential expression (log2FC>1 & p_val_adj <0.05 & PCT1 > 10%) in the given cluster versus all other cells in the dataset
PCT1: Percentage of cells within the cluster expressing the gene
PCT2: Percentage of cells outside the cluster expressing the gene
Gene	Ave. Log2 FC	p Value	p Value Adj.	PCT1	PCT2	Arabidopsis orthologues	Arabidopsis gene names	Arabidopsis gene description
Wa8730a001g006770	3.18068	1.33197e-123	1.85704e-119	0.891	0.198
Wa8730a00Ug000080	2.5742	1.08388e-28	1.51115e-24	0.27	0.056
Wa8730a020g000810	1.90002	3.71904e-83	5.18509e-79	0.603	0.099	AT3G52720 AT2G28210 AT5G04180 AT1G08080	ACA1, ATACA1, CAH1 ACA2, ATACA2 ACA3, ATACA3 ACA7, ATACA7	Encodes a putative alpha carbonic anhydrase (CAH1) located in the chloroplast stroma. Most chloroplast proteins are encoded by the nuclear genome and imported with the help of sorting signals that are intrinsic parts of the polypeptides. CAH1 takes an alternative route through the secretory pathway, and becomes N-glycosylated before entering the chloroplast. alpha carbonic anhydrase 2 alpha carbo…
Wa8730a015g003250	1.89508	1.21539e-89	1.69449e-85	0.713	0.133	AT3G30842 AT1G15520	ABCG38, ATPDR10, PDR10 ABCG40, ATABCG40, ATPDR12, PDR12	pleiotropic drug resistance 10 ABC transporter family involved in ABA transport and resistance to lead. Localizes to plasma membrane. Upregulated by lead. Expressed in leaves, flowers, stomata and roots.
Wa8730a017g002540	1.84335	2.37791e-60	3.31528e-56	0.937	0.413	AT2G45960 AT3G61430 AT1G01620 AT4G00430 AT4G23400 AT2G37170 AT2G39010 AT4G35100 AT2G16850	ATHH2, PIP1 2, PIP1B, TMP-A ATPIP1, PIP1, PIP1 1, PIP1A PIP1 3, PIP1C, TMP-B PIP1 4, PIP1E, TMP-C PIP1 5, PIP1D PIP2 2, PIP2B PIP2 6, PIP2E PIP2 7, PIP3, PIP3A, SIMIP PIP2 8, PIP3B	a member of the plasma membrane intrinsic protein subfamily PIP1. localizes to the plasma membrane and exhibits water transport activity in Xenopus oocyte. expressed ubiquitously and protein level decreases slightly during leaf development. a member of the plasma membrane intrinsic protein subfamily PIP1. localizes to the plasma membrane and exhibits water transport activity in Xenopus oocyte. ex…
Wa8730a009g001780	1.83616	4.15826e-86	5.79744e-82	0.805	0.188	AT3G63110 AT5G19040 AT3G23630	ATIPT3, IPT3 ATIPT5, IPT5 ATIPT7, IPT7	Encodes cytokinin synthase involved in cytokinin biosynthesis. IPT3 subcellular localization is modulated by farnesylation- when farnesylated it is localized to the nucleus, otherwise to the chloroplast. Encodes cytokinin synthase. Encodes an isopentenyl transferase involved in cytokinin biosynthesis.
Wa8730a003g001330	1.82981	7.54643e-69	1.05212e-64	0.828	0.228	AT4G37850 AT2G22750		basic helix-loop-helix (bHLH) DNA-binding superfamily protein basic helix-loop-helix (bHLH) DNA-binding superfamily protein
Wa8730a012g004900	1.78352	9.91811e-75	1.38278e-70	0.793	0.194	AT5G10180 AT1G78000 AT4G08620 AT1G22150	AST68, SULTR2 1 SEL1, SULTR1 2 SULTR1 1 SULTR1 3	Encodes a low-affinity sulfate transporter expressed in the root cap and central cylinder, where it is induced by sulfur starvation. Expression in the shoot vascular system is not induced by sulfur starvation. Encodes a sulfate transporter that can restore sulfate uptake capacity of a yeast mutant lacking sulfate transporter genes. Encodes a sulfate transporter. Contains STAS domain. Expressed in…
Wa8730a008g001000	1.73464	1.9207e-57	2.67783e-53	0.856	0.3
Wa8730a013g005740	1.7235	5.25829e-125	7.3311e-121	0.678	0.088	AT4G14365 AT3G23280	XBAT34 XBAT35	XB3 ortholog 4 in Arabidopsis thaliana Encodes a ubiquitin ligase that is a novel player in ethylene signaling involved in negatively regulating apical hook curvature, with alternative splicing controlling dual targeting to the nuclear and cytoplasmic compartments.
Wa8730a006g004370	1.68723	2.29362e-92	3.19776e-88	0.713	0.133	AT2G41480 AT5G64120 AT5G66390 AT1G05260 AT2G34060 AT3G21770 AT5G15180 AT5G39580 AT3G03670 AT1G49570	AtPRX25, PRX25 AtPRX71, PRX71 PRX72 RCI3, RCI3A	Encodes a cationic cell-wall-bound peroxidase homolog that is involved in the lignification of cell walls. encodes a cell wall bound peroxidase that is induced by hypo-osmolarity Encodes a peroxidase that is involved in lignin biosynthesis. Encodes a cold-inducible cationic peroxidase that is involved in the stress response. In response to low temperature, RCI3 transcripts accumulate in the aeria…
Wa8730a011g003440	1.66251	8.65817e-68	1.20712e-63	0.885	0.297	AT1G30270	ATCIPK23, CIPK23, LKS1, PKS17, SnRK3.23	Arabidopsis thaliana CBL-interacting protein kinase 23. CIPK23 serves as a positive regulator of the potassium transporter AKT1 by directly phosphorylating AKT1. CIPK23 is activated by the binding of two calcineurin B-like proteins, CBL1 and CBL9.
Wa8730a015g001600	1.65478	1.44025e-35	2.00799e-31	0.563	0.185	AT4G30280 AT5G48070 AT2G18800 AT4G25810 AT5G57550	ATXTH18, XTH18 ATXTH20, XTH20 ATXTH21, XTH21 XTH23, XTR6 XTH25, XTR3	Encodes a xyloglucan endotransglucosylase/hydrolase with only only the endotransglucosylase (XET EC 2.4.1.207) activity towards xyloglucan and non-detectable endohydrolytic (XEH EC 3.2.1.151) activity. Expressed in the mature or basal regions of both the main and lateral roots, but not in the tip of these roots where cell division occurs. putative xyloglucan endotransglycosylase/hydrolase, expres…
Wa8730a013g001900	1.63597	2.94227e-80	4.10211e-76	0.644	0.119	AT4G12310 AT2G45570 AT2G46660 AT1G01190	CYP706A5 CYP76C2 CYP78A6, EOD3 CYP78A8	member of CYP706A member of CYP76C member of CYP78A member of CYP78A
Wa8730a014g002160	1.60034	5.81993e-78	8.11414e-74	0.69	0.135
Wa8730a015g001580	1.60007	5.91525e-29	8.24705e-25	0.724	0.332	AT4G30280 AT5G48070 AT2G18800 AT4G25810 AT5G57550	ATXTH18, XTH18 ATXTH20, XTH20 ATXTH21, XTH21 XTH23, XTR6 XTH25, XTR3	Encodes a xyloglucan endotransglucosylase/hydrolase with only only the endotransglucosylase (XET EC 2.4.1.207) activity towards xyloglucan and non-detectable endohydrolytic (XEH EC 3.2.1.151) activity. Expressed in the mature or basal regions of both the main and lateral roots, but not in the tip of these roots where cell division occurs. putative xyloglucan endotransglycosylase/hydrolase, expres…
Wa8730a010g001140	1.55848	6.88004e-21	9.59215e-17	0.661	0.323	AT4G29190 AT2G25900 AT2G19810 AT1G03790 AT5G44260	AtC3H49, AtOZF2, AtTZF3, OZF2, TZF3 ATCTH, ATTZF1 AtOZF1, AtTZF2, OZF1, TZF2 AtTZF4, SOM, TZF4 AtTZF5, TZF5	Zinc finger C-x8-C-x5-C-x3-H type family protein putative Cys3His zinc finger protein (ATCTH) mRNA, complete Encodes Oxidation-related Zinc Finger 1 (OZF1), a plasma membrane protein involved in oxidative stress. Encodes SOMNUS (SOM), a nucleus-localized CCCH-type zinc finger protein. SOM negatively regulates light-dependent seed germination downstream of PIL5 (AT2G20180). Encodes a Tandem CCCH Z…
Wa8730a005g003160	1.53646	7.39523e-52	1.03104e-47	0.724	0.22	AT4G28940		Phosphorylase superfamily protein
Wa8730a008g000620	1.49042	8.44996e-44	1.17809e-39	0.925	0.487
Wa8730a001g000280	1.48755	1.49365e-70	2.08245e-66	0.833	0.214	AT3G12500 AT4G01700 AT1G02360	ATHCHIB, B-CHI, CHI-B, HCHIB, PR-3, PR3	encodes a basic chitinase involved in ethylene/jasmonic acid mediated signalling pathway during systemic acquired resistance based on expression analyses. Chitinase family protein Chitinase family protein
Wa8730a008g004040	1.48191	2.59468e-84	3.61751e-80	0.69	0.13	AT4G19960 AT1G31120 AT2G35060	ATKUP9, HAK9, KT9, KUP9 KUP10 KUP11	Encodes a potassium ion transmembrane transporter. Also mediates cesium uptake when expressed in E. coli. potassium transporter potassium transporter
Wa8730a014g002180	1.48158	9.29508e-77	1.29592e-72	0.816	0.189
Wa8730a003g005480	1.46397	4.30548e-43	6.0027e-39	0.954	0.584
Wa8730a001g003150	1.4544	1.42831e-54	1.99135e-50	0.782	0.243	AT5G18680 AT2G47900 AT1G47270 AT3G06380	AtTLP11, TLP11 AtTLP3, TLP3 AtTLP6, TLP6 ATTLP9, TLP9	Member of TLP family Member of TLP family Member of TLP family Member of TLP family
Wa8730a008g001340	1.43475	6.1653e-42	8.59566e-38	0.799	0.328
Wa8730a003g004980	1.42619	7.68134e-68	1.07093e-63	0.46	0.069	AT3G51590	LTP12	Encodes a member of the lipid transfer protein family. Proteins of this family are generally small (~9 kD), basic, expressed abundantly and contain eight Cys residues. The proteins can bind fatty acids and acylCoA esters and can transfer several different phospholipids. They are localized to the cell wall. The LTP12 promoter is active exclusively in the tapetum during the uninucleate microspore a…
Wa8730a016g002860	1.4176	4.36471e-53	6.08527e-49	0.931	0.397	AT1G68610 AT3G18470 AT1G49030	PCR11	Target promoter of the male germline-specific transcription factor DUO1. PLAC8 family protein PLAC8 family protein
Wa8730a008g000450	1.41063	7.91701e-40	1.10379e-35	0.822	0.377
Wa8730a004g008250	1.40583	4.81585e-128	6.71426e-124	0.523	0.044
Wa8730a013g005520	1.40193	3.0843e-84	4.30013e-80	0.724	0.145
Wa8730a015g004730	1.40104	1.142e-71	1.59217e-67	0.649	0.132	AT3G28345	ABCB15, MDR13	Encodes an ATP-binding cassette (ABC) transporter. Expressed in the vascular tissue of primary stem.
Wa8730a006g004380	1.401	7.5244e-42	1.04905e-37	0.914	0.457	AT3G07570		Cytochrome b561/ferric reductase transmembrane with DOMON related domain
Wa8730a018g002470	1.38987	1.5899e-53	2.21664e-49	0.839	0.288	AT4G02330 AT5G27870 AT3G05620 AT5G49180 AT3G10720 AT1G02810 AT2G47550 AT5G04970 AT4G15980 AT3G06830	ATPMEPCRB, AtPME41, PME41	Encodes a pectin methylesterase that is sensitive to chilling stress and brassinosteroid regulation. Plant invertase/pectin methylesterase inhibitor superfamily Plant invertase/pectin methylesterase inhibitor superfamily Encodes a putative pectin methylesterase. The gene is preferentially expressed in floral buds. Plant invertase/pectin methylesterase inhibitor superfamily Plant invertase/pectin …
Wa8730a003g000980	1.38841	2.1051e-43	2.93493e-39	0.851	0.383	AT2G22860 AT3G49780 AT4G37720	ATPSK2, PSK2 ATPSK3, ATPSK4, PSK4 ATPSK6, PSK6	Phytosulfokine 2 precursor, coding for a unique plant peptide growth factor. Phytosulfokine 3 precursor, coding for a unique plant peptide growth factor. Plants overexpressing this gene (under a 35S promoter), develop normal cotyledons and hypocotyls but their growth, in particular that of their roots, was faster than that of wildtype. Probable phytosulfokines 6 precursor, coding for a unique pla…
Wa8730a015g001790	1.38313	3.59576e-18	5.01321e-14	0.948	0.788	AT1G80920	AtJ8, AtToc12, DJC22, J8, Toc12	A nuclear encoded soluble protein found in the chloroplast stroma.
Wa8730a013g005770	1.37241	4.70834e-58	6.56437e-54	0.667	0.172	AT4G14365 AT3G23280	XBAT34 XBAT35	XB3 ortholog 4 in Arabidopsis thaliana Encodes a ubiquitin ligase that is a novel player in ethylene signaling involved in negatively regulating apical hook curvature, with alternative splicing controlling dual targeting to the nuclear and cytoplasmic compartments.
Wa8730a014g002170	1.36237	3.84616e-62	5.36231e-58	0.862	0.249
Wa8730a015g000910	1.35385	1.33688e-38	1.86387e-34	0.552	0.154	AT4G31500 AT5G07990	ATR4, CYP83B1, RED1, RNT1, SUR2 CYP75B1, D501, TT7	Encodes an oxime-metabolizing enzyme in the biosynthetic pathway of glucosinolates. Is required for phytochrome signal transduction in red light. Mutation confers auxin overproduction. Required for flavonoid 3' hydroxylase activity.
Wa8730a004g001070	1.35299	3.98501e-37	5.55591e-33	0.914	0.491	AT5G60770 AT1G12940	ATNRT2.4, NRT2.4 ATNRT2.5, NRT2.5	member of High affinity nitrate transporter family member of High affinity nitrate transporter family
Wa8730a019g003710	1.34798	2.89859e-70	4.04121e-66	0.684	0.154	AT1G09530 AT2G46970 AT4G02590	PAP3, PIF3, POC1 PIL1 UNE12	Transcription factor interacting with photoreceptors phyA and phyB. Forms a ternary complex in vitro with G-box element of the promoters of LHY, CCA1. Acts as a negative regulator of phyB signalling. It degrades rapidly after irradiation of dark grown seedlings in a process controlled by phytochromes. Does not play a significant role in controlling light input and function of the circadian clockw…
Wa8730a015g000890	1.3467	1.11026e-45	1.54792e-41	0.977	0.511	AT4G30290 AT5G48070 AT2G18800 AT4G25810 AT5G57550	ATXTH19, XTH19 ATXTH20, XTH20 ATXTH21, XTH21 XTH23, XTR6 XTH25, XTR3	Encodes a xyloglucan endotransglucosylase/hydrolase with only only the endotransglucosylase (XET EC 2.4.1.207) activity towards xyloglucan and non-detectable endohydrolytic (XEH EC 3.2.1.151) activity. Expressed throughout both the main and the lateral root, with intensive expression at the dividing and elongating regions. Is expressed in lateral root primordia but expression ceases after lateral…
Wa8730a007g008020	1.30882	2.02867e-59	2.82838e-55	0.707	0.189	AT1G34370 AT5G22890	AtSTOP1, STOP1 STOP2	Encodes a putative nuclear Cys(2)His(2)-type zinc finger protein involved in H+ and Al3+ rhizotoxicity. In mutants exposed to aluminum stress, there is no induction of AtALMT1, an malate transporter known to be involved in the mediation of aluminum toxicity. An unique homologue of STOP1 (AT1G34370) in Arabidopsis genome. Transformation to the stop1-mutant activated several genes that are regulate…
Wa8730a001g012130	1.30583	4.67671e-17	6.52028e-13	0.747	0.47	AT3G54040		PAR1 protein
Wa8730a001g008770	1.30192	6.86874e-45	9.57639e-41	0.586	0.163
Wa8730a005g006550	1.28479	1.18309e-24	1.64946e-20	0.741	0.348	AT3G27880 AT5G14730		Protein of unknown function (DUF1645)
Wa8730a001g007820	1.27592	2.29449e-57	3.19898e-53	0.799	0.251	AT2G18960 AT1G17260 AT5G62670 AT4G30190 AT5G57350 AT2G24520 AT2G07560 AT1G80660	AHA1, HA1, OST2, PMA AHA10 AHA11, HA11 AHA2, HA2, PMA2 AHA3, ATAHA3, HA3 AHA5, HA5 AHA6, HA6 AHA9, HA9	Encodes a plasma membrane proton ATPase. Mutants have a reduced ability to close their stomata in response to drought and are affected in stomatal but not seed responsiveness to ABA. belongs to H+-APTase gene family, involved in proanthocyanidin biosynthesis, disturbs the vacuolar biogenesis and acidification process H(+)-ATPase 11 belongs to the P-type ATPase superfamily of cation-transporting A…
Wa8730a011g002730	1.27443	4.90943e-54	6.84473e-50	0.523	0.11
Wa8730a014g000630	1.24966	2.62098e-39	3.65417e-35	0.948	0.533
Wa8730a002g006740	1.24151	4.03765e-43	5.62929e-39	0.672	0.223	AT1G66120 AT2G17650 AT1G21540 AT1G75960	AAE11, AtAAE11	AMP-dependent synthetase and ligase family protein AMP-dependent synthetase and ligase family protein AMP-dependent synthetase and ligase family protein AMP-dependent synthetase and ligase family protein
Wa8730a015g004370	1.23937	6.39301e-42	8.91314e-38	0.81	0.349	AT3G01470 AT1G69780 AT2G22430	ATHB-1, ATHB1, HAT5, HB-1, HD-ZIP-1 ATHB13 ATHB6, HB6	Encodes a homeodomain leucine zipper class I (HD-Zip I) transcriptional activator involved in leaf development. Encodes a homeodomain leucine zipper class I (HD-Zip I) protein. Encodes a homeodomain leucine zipper class I (HD-Zip I) protein that is a target of the protein phosphatase ABI1 and regulates hormone responses in Arabidopsis.
Wa8730a001g006060	1.22874	1.88107e-51	2.62259e-47	0.776	0.251	AT3G10960	ATAZG1, AZG1	Encodes a homolog of the adenine-guanine-hypoxanthine transporter AzgA of Aspergillus nidulans. Function as a plant adenine-guanine transporter. Two closely related genes exist in Arabidopsis: AT3G10960 (Azg1) and AT5G50300 (Azg2).
Wa8730a002g001530	1.22734	4.67066e-43	6.51183e-39	0.879	0.378	AT4G24130		Protein of unknown function, DUF538
Wa8730a017g003890	1.22662	1.94617e-82	2.71335e-78	0.58	0.094	AT1G13300 AT1G68670 AT1G25550	HRS1	Overexpression confers hypersensitivity to low phosphate-elicited inhibition of primary root growth. HHO2 is a HRS1 homolog. Induced in roots by low Pi and is likely involved in maintaining phosphate homeostasis. It is target of PHR1. myb-like transcription factor family protein
Wa8730a004g006810	1.21855	1.38535e-42	1.93146e-38	0.902	0.404	AT5G44130	FLA13	FASCICLIN-like arabinogalactan protein 13 precursor
Wa8730a016g003520	1.21843	5.21298e-26	7.26794e-22	0.931	0.711	AT5G37600 AT3G17820 AT5G35630 AT1G66200 AT5G16570 AT1G48470	ATGLN1 1, ATGSR1, GLN1 1, GSR ATGSKB6, GLN1.3, GLN1 3 ATGSL1, GLN2, GS2 ATGSR2, GLN1 2, GSR2 GLN1 4 GLN1 5	encodes a cytosolic glutamine synthetase, the enzyme has high affinity with substrate ammonium encodes a cytosolic glutamine synthetase, the enzyme has low affinity with substrate ammonium chloroplastic glutamine synthetase encodes a cytosolic glutamate synthetase, this enzyme has low affinity with substrate ammonium Encodes a cytosolic glutamine synthetase, the enzyme has high affinity with subs…
Wa8730a001g011180	1.21582	2.79057e-57	3.89061e-53	0.845	0.263	AT5G02540 AT2G37540 AT4G11410		NAD(P)-binding Rossmann-fold superfamily protein NAD(P)-binding Rossmann-fold superfamily protein NAD(P)-binding Rossmann-fold superfamily protein
Wa8730a006g003980	1.21473	1.75889e-55	2.45224e-51	0.603	0.148	AT3G59310		Eukaryotic protein of unknown function (DUF914)
Wa8730a001g008060	1.2079	1.07191e-63	1.49446e-59	0.759	0.205	AT5G62570 AT5G57580 AT4G31000 AT2G24300	CBP60a	Calmodulin binding protein-like Calmodulin-binding protein Calmodulin-binding protein Calmodulin-binding protein
Wa8730a013g005780	1.20685	1.95224e-74	2.72181e-70	0.552	0.095	AT4G14365 AT3G23280	XBAT34 XBAT35	XB3 ortholog 4 in Arabidopsis thaliana Encodes a ubiquitin ligase that is a novel player in ethylene signaling involved in negatively regulating apical hook curvature, with alternative splicing controlling dual targeting to the nuclear and cytoplasmic compartments.
Wa8730a006g002120	1.20632	3.88101e-37	5.4109e-33	0.966	0.747	AT5G50200 AT4G24715	ATNRT3.1, NRT3.1, WR3 NA	Wound-responsive gene 3 (WR3). Encodes a high-affinity nitrate transporter. Up-regulated by nitrate. Involved in jasmonic acid-independent wound signal transduction. NA
Wa8730a012g005020	1.18988	1.54191e-45	2.14973e-41	0.391	0.071	AT1G14290	SBH2	Encodes one of the two redundant sphingoid base hydroxylases (SBH). Involved in sphingolipid trihydroxy long-chain base (4-hydroxysphinganine) biosynthesis. Double mutants of SBHs were dwarfed and not able to progress from vegetative to reproductive growth.
Wa8730a020g003020	1.18917	3.01759e-41	4.20712e-37	0.943	0.508	AT1G24400 AT5G40780 AT1G67640 AT3G01760	AATL2, ATLHT2, LHT2 LHT1	High-affinity transporter for neutral and acidic amino acids, expressed in tapetum tissue of anthers Encodes LHT1 (lysine histidine transporter), a high-affinity transporter for cellular amino acid uptake in both root epidermis and leaf mesophyll. Transmembrane amino acid transporter family protein Encodes an amino acid transporter expressed in the root that is involved in the uptake of acidic am…
Wa8730a007g005010	1.18124	5.29988e-48	7.3891e-44	0.851	0.314	AT1G09400		FMN-linked oxidoreductases superfamily protein
Wa8730a001g007430	1.17123	2.60047e-64	3.62557e-60	0.77	0.204	AT4G25850 AT5G57240	ORP4B ORP4C	OSBP(oxysterol binding protein)-related protein 4B OSBP(oxysterol binding protein)-related protein 4C
Wa8730a009g005210	1.1674	1.23977e-63	1.72849e-59	0.736	0.194	AT5G20960 AT3G43600 AT1G50780	AAO1, AO1, AOalpha, AT-AO1, ATAO, AtAO1 AAO2, AO3, AOgamma, AtAO3, atAO-2	Encodes aldehyde oxidase AA01. Encodes an aldehyde oxidase. AAO2 does not appear to act on abscisic aldehyde in vitro but it is possible that it may function in abscisic acid biosynthesis when the activity of At2g27150 (AAO3), the primary abscisic aldehyde oxidase, is lost. 2Fe-2S ferredoxin-like superfamily protein
Wa8730a002g002720	1.16707	1.86291e-36	2.59728e-32	0.839	0.402	AT3G60780 AT2G45360 AT1G62840 AT1G12320 AT5G62280		Protein of unknown function (DUF1442) Protein of unknown function (DUF1442) Protein of unknown function (DUF1442) Protein of unknown function (DUF1442) Protein of unknown function (DUF1442)
Wa8730a015g003240	1.16544	7.25868e-50	1.01201e-45	0.851	0.307	AT3G30842 AT1G15520	ABCG38, ATPDR10, PDR10 ABCG40, ATABCG40, ATPDR12, PDR12	pleiotropic drug resistance 10 ABC transporter family involved in ABA transport and resistance to lead. Localizes to plasma membrane. Upregulated by lead. Expressed in leaves, flowers, stomata and roots.
Wa8730a009g006930	1.1633	1.10744e-40	1.54399e-36	0.713	0.243	AT2G22860 AT3G49780 AT4G37720	ATPSK2, PSK2 ATPSK3, ATPSK4, PSK4 ATPSK6, PSK6	Phytosulfokine 2 precursor, coding for a unique plant peptide growth factor. Phytosulfokine 3 precursor, coding for a unique plant peptide growth factor. Plants overexpressing this gene (under a 35S promoter), develop normal cotyledons and hypocotyls but their growth, in particular that of their roots, was faster than that of wildtype. Probable phytosulfokines 6 precursor, coding for a unique pla…
Wa8730a003g008790	1.16074	4.46179e-54	6.22063e-50	0.747	0.228	AT5G06440 AT3G11720		Polyketide cyclase/dehydrase and lipid transport superfamily protein
Wa8730a005g001430	1.15516	2.03172e-67	2.83262e-63	0.661	0.139	AT1G13140 AT4G39490 AT5G02900 AT4G32170 AT5G52320 AT2G21910 AT1G47620	CYP86C3 CYP96A10 CYP96A13 CYP96A2 CYP96A4 CYP96A5 CYP96A8	member of CYP86C member of CYP96A member of CYP96A member of CYP96A member of CYP96A member of CYP96A member of CYP96A
Wa8730a011g003030	1.12612	4.60431e-49	6.41933e-45	0.46	0.093	AT4G19690 AT3G12750 AT1G31260	ATIRT1, IRT1 AtZIP1, ZIP1 ZIP10	Fe(II) transport protein (IRT1) A member of Zrt- and Irt-related protein (ZIP) family. transcript is induced in response to zinc deficiency in the root. member of Fe(II) transporter isolog family
Wa8730a008g003840	1.11976	2.59872e-48	3.62314e-44	0.471	0.095	AT4G19690 AT3G12750 AT2G30080 AT1G31260 AT2G32270 AT1G05300 AT2G04032	ATIRT1, IRT1 AtZIP1, ZIP1 ATZIP6, ZIP6 ZIP10 ZIP3 ZIP5 ZIP7	Fe(II) transport protein (IRT1) A member of Zrt- and Irt-related protein (ZIP) family. transcript is induced in response to zinc deficiency in the root. member of Fe(II) transporter isolog family. Gene expression is not regulated by iron, copper, or zinc deficiency or excess. member of Fe(II) transporter isolog family A member of Zrt- and Irt-related protein (ZIP) family. transcript is induced in…
Wa8730a004g003310	1.11344	1.2229e-74	1.70497e-70	0.655	0.124
Wa8730a011g005590	1.11157	2.60784e-49	3.63585e-45	0.793	0.253	AT5G57800	CER3, FLP1, WAX2, YRE	encodes a transmembrane protein with similarity to the sterol desaturase family at the N-terminus and to the short-chain dehydrogenase/reductase family at the C-terminus. Mutant analyses indicate this protein is involved in cuticle membrane and wax biosynthesis.
Wa8730a012g000970	1.10937	1.22557e-32	1.70869e-28	0.736	0.295	AT1G22530 AT4G09160 AT1G72160	PATL2	PATELLIN 2 SEC14 cytosolic factor family protein / phosphoglyceride transfer family protein Sec14p-like phosphatidylinositol transfer family protein
Wa8730a015g000850	1.1083	3.13254e-75	4.36739e-71	0.379	0.04	AT4G30290 AT5G48070 AT2G18800 AT4G25810 AT5G57550	ATXTH19, XTH19 ATXTH20, XTH20 ATXTH21, XTH21 XTH23, XTR6 XTH25, XTR3	Encodes a xyloglucan endotransglucosylase/hydrolase with only only the endotransglucosylase (XET EC 2.4.1.207) activity towards xyloglucan and non-detectable endohydrolytic (XEH EC 3.2.1.151) activity. Expressed throughout both the main and the lateral root, with intensive expression at the dividing and elongating regions. Is expressed in lateral root primordia but expression ceases after lateral…
Wa8730a001g007090	1.10623	2.11267e-38	2.94549e-34	0.54	0.146	AT2G41480 AT5G05340	AtPRX25, PRX25 PRX52	Encodes a cationic cell-wall-bound peroxidase homolog that is involved in the lignification of cell walls. Encodes a protein with sequence similarity to peroxidases that is involved in lignin biosynthesis. Loss of function mutations show abnormal development of xylem fibers and reduced levels of lignin biosynthetic enxymes.
Wa8730a007g005500	1.09781	1.21941e-37	1.70011e-33	0.868	0.407	AT5G49720 AT4G24260 AT4G09740	ATGH9A1, DEC, GH9A1, IRX2, KOR, KOR1, RSW2, TSD1 ATGH9A3, GH9A3, KOR3 AtGH9B14, GH9B14	Encodes a membrane-bound endo-1,4-beta-D-glucanase, involved in cellulose biosynthesis. Loss-of-function mutants have severe cellulose-deficient phenotypes. During cell elongation, KOR1 is associated with Golgi apparatus and early endosome. Inhibition of cellulose biosynthesis promoted a redistribution of KOR1 in subcellular locations. These observations suggest that deposition of cellulose invol…
Wa8730a007g002940	1.0937	1.41353e-08	0.000197074	0.253	0.11	AT4G24960 AT5G50720 AT2G42820	ATHVA22D, HVA22D ATHVA22E, HVA22E HVA22F	Homologous to a eukaryote specific ABA- and stress-inducible gene first isolated from barley. Groups in one subfamily with ATHVA22E. Along with other members of the ATHVA22 family, it may be involved in regulation of autophagy during development. Encodes one of five HVA22 homologs in Arabidopsis. HVA22 is an ABA- and stress-inducible gene first isolated from barley. Members of this gene family ha…
Wa8730a009g003160	1.09088	1.14206e-54	1.59226e-50	0.684	0.175
Wa8730a005g000930	1.0865	1.44053e-27	2.00839e-23	0.902	0.565	AT1G15670 AT1G80440 AT2G21950	KFB01, KMD2 KFB20, KMD1 SKIP6	Encodes a member of a family of F-box proteins, called the KISS ME DEADLY (KMD) family, that targets type-B ARR proteins for degradation and is involved in the negative regulation of the cytokinin response. Also named as KFB1, a member of a group of Kelch repeat F-box proteins that negatively regulate phenylpropanoid biosynthesis by targeting the phenypropanoid biosynthesis enzyme phenylalanine a…
Wa8730a001g001570	1.08477	4.65879e-107	6.49528e-103	0.506	0.05	AT5G49760 AT1G69730 AT4G31100		Leucine-rich repeat protein kinase family protein Wall-associated kinase family protein wall-associated kinase, putative
Wa8730a006g006710	1.08222	2.51974e-45	3.51302e-41	0.552	0.139	AT1G12880 AT2G01670 AT1G14860 AT1G73540 AT1G18300	NUDT12, atnudt12 NUDT17, atnudt17 NUDT18, atnudt18 NUDT21, atnudt21 NUDT4, atnudt4	nudix hydrolase homolog 12 nudix hydrolase homolog 17 nudix hydrolase homolog 18 nudix hydrolase homolog 21 nudix hydrolase homolog 4
Wa8730a009g003140	1.08088	4.75936e-54	6.6355e-50	0.626	0.153
Wa8730a016g004290	1.07563	5.50988e-51	7.68187e-47	0.58	0.14	AT1G14370 AT2G26290 AT2G05940 AT5G22050 AT1G67510 AT1G16760 AT1G72540 AT5G35580	APK2A, Kin1, PBL2 ARSK1 RIPK	Encodes protein kinase APK2a. root-specific kinase 1 Encodes a receptor-like cytoplasmic kinase that phosphorylates the host target RIN4, leading to the activation of a plant innate immune receptor RPM1. Protein kinase superfamily protein Leucine-rich repeat protein kinase family protein Protein kinase protein with adenine nucleotide alpha hydrolases-like domain Protein kinase superfamily protein…
Wa8730a002g003240	1.06107	7.37209e-49	1.02782e-44	0.494	0.107	AT1G12110	ATNRT1, AtNPF6.3, B-1, CHL1, CHL1-1, NPF6.3, NRT1, NRT1.1	Encodes NRT1.1 (CHL1), a dual-affinity nitrate transporter. The protein is expressed in guard cells and function in stomatal opening. Mutants have less transpiration and are more tolerant to drought. Expressed in lateral roots. Involved in nitrate signaling which enables the plant root system to detect and exploit nitrate-rich soil patches. Comparing to the wild type, the mutant displays a strong…
Wa8730a016g001640	1.06092	1.76386e-27	2.45918e-23	0.598	0.233	AT1G35140 AT5G64260 AT5G09440 AT4G08950	EXL1, PHI-1 EXL2 EXL4 EXO	At1g35140 (At1g35140/T32G9_32) mRNA, complete cds EXORDIUM like 2 EXORDIUM like 4 Phosphate-responsive 1 family protein
Wa8730a009g003220	1.05039	1.7394e-48	2.42507e-44	0.569	0.133
Wa8730a006g005390	1.04984	2.62169e-43	3.65516e-39	0.724	0.253
Wa8730a009g004350	1.04806	2.13386e-75	2.97503e-71	0.483	0.067	AT1G02520 AT3G62150 AT4G01820 AT2G47000	ABCB11, MDR8, PGP11 ABCB21, PGP21 ABCB3, MDR3, PGP3 ABCB4, ATPGP4, AtABCB4, MDR4, PGP4	Encodes an ATP-binding cassette (ABC) transporter. Expressed in the vascular tissue of primary stem. The mRNA is cell-to-cell mobile. Encodes a facultative transporter controlling auxin concentrations in plant cells. member of MDR subfamily Multidrug resistance P-glycoprotein (MDR/PGP) subfamily of ABC transporters. Functions in the basipetal redirection of auxin from the root tip. Exhibits apola…
Wa8730a011g001280	1.04758	7.8844e-60	1.09924e-55	0.678	0.167	AT5G46710 AT4G17900 AT1G32700		PLATZ transcription factor family protein PLATZ transcription factor family protein PLATZ transcription factor family protein
Wa8730a001g003140	1.04318	5.48577e-22	7.64826e-18	0.759	0.378	AT5G18670	BAM9, BMY3	putative beta-amylase BMY3 (BMY3)
Wa8730a004g007780	1.04213	2.09098e-48	2.91524e-44	0.678	0.198	AT1G51800 AT4G29180 AT5G25930 AT3G08680 AT5G56790 AT1G49100 AT1G05700 AT1G26970	IOS1 RHS16	The gene encodes a putative member of the LRR-RLK protein family. Expressin and mutant analysis revealed that it contributes to the interaction between Arabidopsis and Hyaloperonospora arabidopsidis. and The mRNA is cell-to-cell mobile. root hair specific 16 Protein kinase family protein with leucine-rich repeat domain Leucine-rich repeat protein kinase family protein Protein kinase superfamily p…
Wa8730a006g003200	1.03822	1.08351e-77	1.51063e-73	0.569	0.091
Wa8730a019g000710	1.03759	3.08883e-28	4.30645e-24	0.822	0.391	AT3G55150 AT2G39380 AT3G09520 AT1G07725 AT5G59730 AT2G28650	ATEXO70H1, EXO70H1 ATEXO70H2, EXO70H2 ATEXO70H4, EXO70H4 ATEXO70H6, EXO70H6 ATEXO70H7, EXO70H7 ATEXO70H8, EXO70H8	A member of EXO70 gene family, putative exocyst subunits, conserved in land plants. Arabidopsis thaliana contains 23 putative EXO70 genes, which can be classified into eight clusters on the phylogenetic tree. A member of EXO70 gene family, putative exocyst subunits, conserved in land plants. Arabidopsis thaliana contains 23 putative EXO70 genes, which can be classified into eight clusters on the …
Wa8730a010g002420	1.03385	1.9293e-31	2.68983e-27	0.839	0.422	AT1G53310 AT2G42600 AT3G14940	ATPEPC1, ATPPC1, PEPC1, PPC1 ATPPC2, PPC2 ATPPC3, PPC3	Encodes one of four Arabidopsis phosphoenolpyruvate carboxylase proteins. Encodes one of four Arabidopsis phosphoenolpyruvate carboxylase proteins. Encodes a cytosolic phosphoenolpyruvate carboxylase (PEPC) that has activity when expressed in E.coli. Its mRNA is most abundantly expressed in roots and siliques. PPC3 belongs to the plant-type PEPC family. It can form an enzymatically active complex…
Wa8730a007g006890	1.03176	3.60841e-22	5.03085e-18	0.822	0.448	AT1G77260 AT3G51070 AT5G64030 AT2G12875		S-adenosyl-L-methionine-dependent methyltransferases superfamily protein S-adenosyl-L-methionine-dependent methyltransferases superfamily protein S-adenosyl-L-methionine-dependent methyltransferases superfamily protein
Wa8730a004g007210	1.03079	2.66219e-37	3.71162e-33	0.741	0.271	AT5G45650 AT4G15040		subtilase family protein Subtilisin-like serine endopeptidase family protein
Wa8730a010g000690	1.02238	3.46045e-64	4.82456e-60	0.506	0.086	AT4G31800 AT4G22070	ATWRKY18, WRKY18 ATWRKY31, WRKY31	Pathogen-induced transcription factor. Binds W-box sequences in vitro. Forms protein complexes with itself and with WRKY40 and WRKY60. Constitutive expression of WRKY18 enhanced resistance to P. syringae, but its coexpression with WRKY40 or WRKY60 made plants more susceptible to both P. syringae and B. cinerea. WRKY18, WRKY40, and WRKY60 have partially redundant roles in response to the hemibiotr…
Wa8730a013g004680	1.01971	1.04563e-55	1.45782e-51	0.546	0.115	AT5G43360 AT2G32830 AT3G54700	ATPT4, PHT1 3, PHT3 PHT1 5, PHT5 PHT1 7	Encodes Pht1 3, a member of the Pht1 family of phosphate transporters which include: Pht1 1/At5g43350, Pht1 2/At5g43370, Pht1 3/At5g43360, Pht1 4/At2g38940, Pht1 5/At2g32830, Pht1 6/At5g43340, Pht1 7/At3g54700, Pht1 8/At1g20860, Pht1 9/At1g76430 (Plant Journal 2002, 31:341). Encodes Pht1 5, a member of the Pht1 family of phosphate transporters which include: Pht1 1/At5g43350, Pht1 2/At5g43370, Ph…
Wa8730a004g003260	1.01736	2.04892e-57	2.85661e-53	0.333	0.041	AT3G24420		alpha/beta-Hydrolases superfamily protein
Wa8730a006g004140	1.01453	1.11858e-34	1.55953e-30	0.362	0.077	AT2G41480 AT5G64120 AT5G66390 AT1G05260 AT2G22420 AT2G34060 AT3G21770 AT5G15180 AT5G39580 AT1G49570 AT1G14550	AtPRX25, PRX25 AtPRX71, PRX71 PRX72 RCI3, RCI3A	Encodes a cationic cell-wall-bound peroxidase homolog that is involved in the lignification of cell walls. encodes a cell wall bound peroxidase that is induced by hypo-osmolarity Encodes a peroxidase that is involved in lignin biosynthesis. Encodes a cold-inducible cationic peroxidase that is involved in the stress response. In response to low temperature, RCI3 transcripts accumulate in the aeria…
Wa8730a015g001400	1.01155	3.4307e-38	4.78308e-34	0.776	0.311	AT2G18700 AT1G68020	ATTPS11, ATTPSB, TPS11 ATTPS6, TPS6	Encodes an enzyme putatively involved in trehalose biosynthesis. The protein has a trehalose synthase (TPS)-like domain that may or may not be active as well as a trehalose phosphatase (TPP)-like domain. Encodes an enzyme putatively involved in trehalose biosynthesis. The protein has a trehalose synthase (TPS)-like domain and a trehalose phosphatase (TPP)-like domain. It can complement a yeast mu…
Wa8730a007g006910	1.0104	1.04375e-16	1.4552e-12	0.822	0.506	AT1G01720 AT5G63790 AT5G08790 AT1G77450	ANAC002, ATAF1 ANAC102, NAC102 ATAF2, anac081 NAC032, anac032	Belongs to a large family of putative transcriptional activators with NAC domain. Transcript level increases in response to wounding and abscisic acid. ATAF1 attentuates ABA signaling and sythesis. Mutants are hyposensitive to ABA. Encodes a member of the NAC family of transcription factors. ANAC102 appears to have a role in mediating response to low oxygen stress (hypoxia) in germinating seedlin…
Wa8730a001g006240	1.00821	1.39865e-34	1.95e-30	0.943	0.666

## Sheet: Highly Localized DEGs
Dataset S4. Differentially Expressed Genes Showing Strong Localization Within a Given Cluster
Genes showing significant differential expression (log2FC>1 & p_val_adj <0.05) in a given cluster versus all other cells in the dataset, but expressing in fewer than 25% of cells in that cluster (PCT1 < 0.25), and 5% of cells outside of that cluster (PCT2 < 0.05)
PCT1: Percentage of cells within the cluster expressing the gene
PCT2: Percentage of cells outside the cluster expressing the gene
Gene	Ave. Log2 FC	p Value	p Value Adj.	Cluster	PCT1	PCT2	Arabidopsis orthologues	Arabidopsis gene names	Arabidopsis gene description
Wa8730a002g009940	1.4166	5.36977e-39	7.48654e-35	2	0.113	0.01	AT3G23450
Wa8730a002g005090	1.0512	1.87478e-53	2.61382e-49	3	0.104	0.003
Wa8730a010g004190	1.31749	4.90854e-106	6.84349e-102	3	0.231	0.009	AT1G67980 AT4G26220	CCOAMT CCoAOMT7	Encodes S-adenosyl-L-methionine: transcaffeoyl Coenzyme A 3-O-methyltransferase. Encodes a caffeoyl-coenzyme A O-methyltransferase (CCoAOMT)-like protein with a strong preference for methylating the para position of flavanones and dihydroflavonols, whereas flavones and flavonols are methylated in the meta-position.
Wa8730a011g000940	1.29638	1.30328e-86	1.81703e-82	3	0.208	0.01	AT3G21240 AT1G65060	4CL2, AT4CL2 4CL3	encodes an isoform of 4-coumarate:CoA ligase (4CL), which is involved in the last step of the general phenylpropanoid pathway. The catalytic efficiency was in the following (descending) order: p-coumaric acid, caffeic acid, ferulic acid, 5-OH-ferulic acid and cinnamic acid. At4CL2 was unable to use sinapic acid as substrate. encodes an isoform of 4-coumarate:CoA ligase (4CL), which is involved in…
Wa8730a001g009230	1.4231	1.72142e-76	2.40001e-72	3	0.217	0.016	AT1G50520 AT4G12330 AT5G48000 AT1G13090	CYP705A27 CYP706A7 CYP708, CYP708A2, THAH, THAH1 CYP71B28	member of CYP705A member of CYP706A Encodes a member of the CYP708A family of cytochrome P450 enzymes. THAH appears to add a hydroxyl group to the triterpene thalianol. thah1 mutants have an elevated accumulation of thalianol. thah1-1 mutants have longer roots than wild type plants. Thalian-diol and desaturated thalian-diol are lost from the root extracts of thah1-1 mutants. Overexpression of the…
Wa8730a012g000110	1.01494	2.83749e-50	3.95602e-46	3	0.175	0.019	AT5G22740 AT2G35650	ATCSLA02, ATCSLA2, CSLA02, CSLA2 ATCSLA07, ATCSLA7, CSLA07, CSLA7	encodes a beta-mannan synthase based on in vitro enzyme assays from heterologously expressed protein a member of Glycosyltransferase- Family 2 and encodes a beta-mannan synthase based on in vitro enzyme assays from heterologously expressed protein. Mutants exhibit defects in pollen tube growth and embryo development. The defective embryonic development was associated with reduced proliferation an…
Wa8730a005g004920	1.15742	6.89637e-51	9.61492e-47	3	0.183	0.02
Wa8730a016g000400	1.63394	1.0806e-22	1.50658e-18	3	0.124	0.024	AT5G15160	BHLH134, BNQ2	BNQ2 belongs to a family of atypical non-DNA binding basic helix-loop-helix (bHLH) proteins that heterodimerize with and negatively regulate bHLH transcription factors. Directly and negatively regulated by AP3 and PI in petals.Required for appropriate regulation of flowering time.
Wa8730a002g004860	2.25459	7.36692e-35	1.0271e-30	3	0.166	0.027	AT2G27380 AT1G20130	ATEPR1, EPR1	Encodes an extensin like gene involved in seed germination. GDSL-motif esterase/acyltransferase/lipase. Enzyme group with broad substrate specificity that may catalyze acyltransfer or hydrolase reactions with lipid and non-lipid substrates.
Wa8730a009g002980	1.30955	3.9637e-24	5.5262e-20	4	0.115	0.019	AT2G38870		Predicted to encode a PR (pathogenesis-related) peptide that belongs to the PR-6 proteinase inhibitor family. Six putative PR-6-type protein encoding genes are found in Arabidopsis: At2g38900, At2g38870, At5g43570, At5g43580, At3g50020 and At3g46860.
Wa8730a005g001780	1.06143	9.89855e-27	1.38006e-22	4	0.143	0.027	AT1G14540 AT1G71695 AT1G68850 AT5G19890 AT4G25980 AT1G44970 AT4G36430 AT1G49570	PER4	Peroxidase superfamily protein Peroxidase superfamily protein Peroxidase superfamily protein Peroxidase superfamily protein Peroxidase superfamily protein Peroxidase superfamily protein Peroxidase superfamily protein Peroxidase superfamily protein
Wa8730a008g004500	1.1619	1.95016e-11	2.71891e-07	4	0.12	0.04	AT2G32300 AT1G22480	UCC1	Encodes a uclacyanin, a protein precursor that is closely related to precursors of stellacyanins and a blue copper protein from pea pods. Cupredoxin superfamily protein
Wa8730a014g006640	2.02121	1.52679e-23	2.12865e-19	4	0.175	0.044
Wa8730a002g003800	1.2316	1.24644e-08	0.000173779	4	0.12	0.048	AT4G35160 AT5G37170 AT1G77530		Encodes a cytosolic N-acetylserotonin O-methyltransferase that can convert N-acetylserotonin to melatonin and serotonin to 5-methoxytryptamine in the process of melatonin synthesis. It does not have caffeic acid O- methyltransferase activity. O-methyltransferase family protein O-methyltransferase family protein
Wa8730a012g001430	1.19291	6.00168e-31	8.36754e-27	4	0.209	0.048	AT5G63450 AT3G48520 AT1G34540 AT5G08250	CYP94B1 CYP94B3 CYP94D1	member of CYP94B member of CYP94B member of CYP94D Cytochrome P450 superfamily protein
Wa8730a006g006910	1.13664	1.12069e-34	1.56247e-30	6	0.148	0.018	AT1G72830 AT1G54160 AT3G14020 AT1G17590 AT3G20910	ATHAP2C, HAP2C, NF-YA3 NF-YA5, NFYA5 NF-YA6 NF-YA8 NF-YA9	Encodes a subunit of CCAAT-binding complex, binds to CCAAT box motif present in some plant promoter sequences. One of three members of this class (HAP2A, HAP2B, HAP2C), it is expressed in vegetative and reproductive tissues. Encodes a member of the CCAAT-binding transcription factor (CBF-B/NF-YA) family. Expression is upregulated in response to ABA and drought. This regulation appears to be media…
Wa8730a010g000810	1.3099	1.55339e-63	2.16574e-59	6	0.23	0.022	AT3G16380	PAB6	polyadenylate-binding protein, putative / PABP, putative, similar to polyadenylate-binding protein (poly(A)-binding protein) from {Arabidopsis thaliana} SP:P42731, (Cucumis sativus) GI:7528270, {Homo sapiens} SP:Q13310, {Arabidopsis thaliana} SP:Q05196 contains InterPro entry IPR000504: RNA-binding region RNP-1 (RNA recognition motif) (RRM). Member of the class III family of PABP proteins.
Wa8730a013g002640	1.16301	1.02647e-46	1.4311e-42	6	0.196	0.023	AT5G24470 AT2G46790	APRR5, PRR5 APRR9, PRR9, TL1	Encodes a pseudo-response regulator whose mutation affects various circadian-associated biological events such as flowering time in the long-day photoperiod conditions, red light sensitivity of seedlings during early photomorphogenesis, and the period of free-running rhythms of certain clock-controlled genes including CCA1 and APRR1/TOC1 in constant white light. Acts as transcriptional repressor …
Wa8730a004g001380	1.00332	5.71673e-44	7.97027e-40	6	0.207	0.029	AT4G27900 AT5G53420		CCT motif family protein CCT motif family protein
Wa8730a011g002170	1.16041	5.8626e-57	8.17363e-53	6	0.248	0.031
Wa8730a001g004510	1.01609	7.05781e-50	9.84e-46	6	0.23	0.031	AT1G56570 AT4G20760 AT5G37570 AT5G04780	PGN	Encodes a mitochondria-localized pentatricopeptide repeat protein PGN. Functions in defense against necrotrophic fungi and abiotic stress tolerance. NAD(P)-binding Rossmann-fold superfamily protein Pentatricopeptide repeat (PPR-like) superfamily protein Pentatricopeptide repeat (PPR) superfamily protein
Wa8730a012g001940	1.05889	2.09531e-43	2.92128e-39	6	0.219	0.032	AT2G31600 AT1G05860
Wa8730a005g006050	1.02504	8.64355e-41	1.20508e-36	6	0.215	0.033	AT1G16905 AT1G78830		Curculin-like (mannose-binding) lectin family protein Curculin-like (mannose-binding) lectin family protein
Wa8730a007g003230	1.09157	1.45663e-39	2.03084e-35	6	0.219	0.036	AT5G41100 AT2G33490 AT3G26910		hydroxyproline-rich glycoprotein family protein hydroxyproline-rich glycoprotein family protein
Wa8730a004g000030	1.15066	3.55121e-45	4.95109e-41	6	0.237	0.037	AT1G23290 AT1G70600	RPL27A, RPL27AB	Encodes a ribosomal protein L27A, a constituent of the large subunit of the ribosomal complex. Regulated by TCP20. Ribosomal protein L18e/L15 superfamily protein
Wa8730a017g000450	1.03918	4.90035e-30	6.83207e-26	6	0.219	0.047	AT5G18070	DRT101	encodes a novel protein involved in DNA repair from UV damage. Isolated by functional complementation of E. coli UV-sensitive mutants (UVR genes).
Wa8730a004g003870	1.21272	1.5581e-35	2.17231e-31	6	0.237	0.048
Wa8730a009g004900	3.42138	2.12858e-105	2.96767e-101	7	0.231	0.006
Wa8730a013g003600	2.42914	8.95811e-16	1.24894e-11	7	0.104	0.017	AT2G02147	LCR73	Encodes a member of a family of small,secreted, cysteine rich protein with sequence similarity to the PCP (pollen coat protein) gene family.
Wa8730a010g003880	1.61442	9.06194e-20	1.26342e-15	7	0.159	0.03	AT5G38970	ATBR6OX, BR6OX, BR6OX1, CYP85A1	Encodes a polypeptide involved in the C-6 oxidation of brassinosteroids. Heterologous expression of the protein in yeast conferred the ability to catalyze multiple reactions in which the C-6 position of 6-deoxocastasterone, 6-deoxotyphasterol, 3-dehydro-6-deoxoteasterone and 6-deoxoteasterone are oxidized.
Wa8730a002g004080	3.87604	3.17697e-14	4.42933e-10	7	0.137	0.031	AT1G75930 AT5G37690 AT5G41890 AT4G16230 AT1G20120	EXL6	member of Lipase proteins SGNH hydrolase-type esterase superfamily protein GDSL-motif esterase/acyltransferase/lipase. Enzyme group with broad substrate specificity that may catalyze acyltransfer or hydrolase reactions with lipid and non-lipid substrates. GDSL-motif esterase/acyltransferase/lipase. Enzyme group with broad substrate specificity that may catalyze acyltransfer or hydrolase reactions…
Wa8730a008g001980	1.0485	3.58018e-06	0.0499148	7	0.121	0.046

[truncated: 9 more sheets: C0 GO, C1 GO, C2 GO, C3 GO, C4 GO, C5 GO, C6 GO, C7 GO, C8 GO]
