# Supplementary material for: Streamlined spatial and environmental expression signatures characterize the minimalist duckweedWolffia australiana
Source: HighWire-hosted journal article supplement (doi:10.1101/gr.279091.124), 2024-07-01
Supplement: Supplemental_Dataset_S5.xlsx [file Supplemental_Dataset_S5.xlsx]

## Sheet: Stomatal DEGs
Dataset S5. Differentially Expressed Genes for Isolated Stomatal Cells
Genes showing significant differential expression (log2FC>1 & p_val_adj <0.05 & PCT1 > 10%) in the given supercluster versus all other cells in the dataset
PCT1: Percentage of cells within the Supercluster expressing the gene
PCT2: Percentage of cells outside the Supercluster expressing the gene
Wolffia genes highlighted in yellow have Arabidopsis orthologues expressed in the stomatal lineage (Lopez-Anido et al., 2021)
Gene	Ave. Log2 FC	p Value	p Value Adj.	PCT1	PCT2	Arabidopsis orthologues	Arabidopsis gene names	Arabidopsis gene description
Wa8730a005g008440	1.78419	0	0	0.625	0	AT1G48480;AT1G68400;AT1G18390	RKL1;;	Arabidopsis thaliana receptor-like protein kinase (RKL1) gene;leucine-rich repeat transmembrane protein kinase family protein;Encodes a plasma membrane localized protein involved in ABA signaling.
Wa8730a001g007660	1.61865	0	0	0.438	0
Wa8730a014g004900	2.62788	0	0	0.344	0	AT1G75620;AT1G14430;AT1G19900;AT5G19580	;;;	glyoxal oxidase-related protein;glyoxal oxidase-related protein;glyoxal oxidase-related protein;glyoxal oxidase-related protein
Wa8730a014g007210	1.14735	0	0	0.344	0	AT2G33280;AT1G64890;AT1G04570	;;	Major facilitator superfamily protein;Major facilitator superfamily protein;Major facilitator superfamily protein
Wa8730a004g003750	1.10603	0	0	0.312	0
Wa8730a006g004840	1.84479	0	0	0.312	0	AT1G24070	ATCSLA10, CSLA10	encodes a gene similar to cellulose synthase
Wa8730a003g000200	1.17257	0	0	0.281	0	AT4G38000;AT3G50410;AT5G65590;AT4G24060;AT5G66940	DOF4.7;OBP1;SCAP1;;	DNA binding with one finger 4.7;Arabidopsis Dof protein containing a single 51-amino acid zinc finger DNA-binding domain, which may play an important roles in plant growth and development.;Encodes a plant-specific Dof-type transcription factor expressed in maturing guard cells, but not in guard mother cells. It regulates essential processes of stomatal guard cell maturation and functions as a key…
Wa8730a003g003640	2.17923	0	0	0.281	0	AT3G22420;AT5G55560	ATWNK2, WNK2, ZIK3;	Encodes a member of the WNK family (9 members in all) of protein kinases, the structural design of which is clearly distinct from those of other known protein kinases, such as receptor-like kinases and mitogen-activated protein kinases. Its transcription is under the control of circadian rhythms.;Protein kinase superfamily protein
Wa8730a015g002650	2.68023	7.81075e-280	1.08897e-275	0.281	0	AT3G05370;AT3G12610;AT5G06940;AT5G12940;AT3G20820;AT3G57830	AtRLP31, RLP31;DRT100;;;;	receptor like protein 31;Plays role in DNA-damage repair/toleration. Partially complements RecA- phenotypes.;Leucine-rich repeat receptor-like protein kinase family protein;Leucine-rich repeat (LRR) family protein;Leucine-rich repeat (LRR) family protein;Leucine-rich repeat protein kinase family protein
Wa8730a013g004880	1.01235	2.86133e-304	3.98927e-300	0.25	0	AT3G54920;AT3G53190;AT5G09280;AT3G24670;AT1G04680;AT4G13710;AT5G63180;AT3G07010;AT5G04310	PMR6;;;;;;;;	Powdery mildew resistant mutant encodes a pectate lyase-like protein;Pectin lyase-like superfamily protein;Pectin lyase-like superfamily protein;Pectin lyase-like superfamily protein;Pectin lyase-like superfamily protein;Pectin lyase-like superfamily protein;Pectin lyase-like superfamily protein;Pectin lyase-like superfamily protein;Pectin lyase-like superfamily protein
Wa8730a008g004330	1.69217	1.17997e-228	1.64512e-224	0.188	0	AT4G28090;AT4G37160;AT4G22010;AT1G21850	sks10;sks15;sks4;sks8	SKU5 similar 10;SKU5 similar 15;SKU5 similar 4;SKU5 similar 8
Wa8730a010g002030	2.34817	1.52648e-171	2.12822e-167	0.188	0	AT4G18970;AT5G41890;AT5G45670;AT1G29660	;;;	GDSL-motif esterase/acyltransferase/lipase. Enzyme group with broad substrate specificity that may catalyze acyltransfer or hydrolase reactions with lipid and non-lipid substrates.;GDSL-motif esterase/acyltransferase/lipase. Enzyme group with broad substrate specificity that may catalyze acyltransfer or hydrolase reactions with lipid and non-lipid substrates.;GDSL-motif esterase/acyltransferase/l…
Wa8730a012g001400	1.5747	4.31364e-159	6.01408e-155	0.156	0	AT1G71691;AT1G33811;AT5G08460;AT1G29670	;;;	GDSL-motif esterase/acyltransferase/lipase. Enzyme group with broad substrate specificity that may catalyze acyltransfer or hydrolase reactions with lipid and non-lipid substrates.;GDSL-motif esterase/acyltransferase/lipase. Enzyme group with broad substrate specificity that may catalyze acyltransfer or hydrolase reactions with lipid and non-lipid substrates.;GDSL-motif esterase/acyltransferase/l…
Wa8730a001g011350	3.91122	0	0	0.812	0.001	AT1G07645	ATDSI-1VOC, DSI-1VOC	dessication-induced 1VOC superfamily protein
Wa8730a019g003870	3.10834	0	0	0.562	0.001
Wa8730a019g001580	2.02674	3.39544e-306	4.73393e-302	0.344	0.001
Wa8730a017g002850	1.32727	4.90198e-306	6.83434e-302	0.344	0.001	AT2G42000	AtMT4a	AtMT4a is a member of Type 4 metallothionein (MT) genes. It is involved in the early develoment of the embryo and in the accumulation of metal ions especially Zn in the seeds.
Wa8730a018g002390	2.04304	9.27432e-203	1.29303e-198	0.25	0.001	AT4G02330;AT3G05620;AT5G49180;AT3G10720;AT1G02810;AT2G47550;AT5G04970;AT4G15980;AT3G06830	ATPMEPCRB, AtPME41, PME41;;;;;;;;	Encodes a pectin methylesterase that is sensitive to chilling stress and brassinosteroid regulation.;Plant invertase/pectin methylesterase inhibitor superfamily;Encodes a putative pectin methylesterase. The gene is preferentially expressed in floral buds.;Plant invertase/pectin methylesterase inhibitor superfamily;Plant invertase/pectin methylesterase inhibitor superfamily;Plant invertase/pectin …
Wa8730a016g000630	3.0147	4.28709e-152	5.97706e-148	0.25	0.001	AT1G34245;AT1G71866	EPF2;	Encodes a secretory peptide EPF2 expressed in proliferating cells of the stomatal lineage, known as meristemoids, and in guard mother cells, the progenitors of stomata. Controls asymmetric cell divisions during stomatal development. EPF2 is related to EPF1, also involved in stomatal development.;
Wa8730a002g000080	5.57118	0	0	0.844	0.002	AT4G21620		glycine-rich protein
Wa8730a017g001630	3.944	0	0	0.688	0.002	AT1G12480	CDI3, OZS1, RCD3, SLAC1	Encodes a membrane protein with 10 predicted transmembrane helices. SLAC1 is a multispanning membrane protein expressed predominantly in guard cells that plays a role in regulating cellular ion homeostasis and S-type anion currents. SLAC1 is important for normal stomatal closure in response to a variety of signals including elevated CO2, ozone, ABA, darkness, and humidity. SLAC1:GFP localizes to …
Wa8730a018g003250	1.03496	1.31237e-255	1.8297e-251	0.406	0.002	AT3G17640;AT4G03010	;	Leucine-rich repeat (LRR) family protein;RNI-like superfamily protein
Wa8730a002g009220	1.68273	6.45565e-248	9.00047e-244	0.375	0.002	AT1G65060;AT1G62940;AT4G19010	4CL3;ACOS5;	encodes an isoform of 4-coumarate:CoA ligase (4CL), which is involved in the last step of the general phenylpropanoid pathway. mRNA levels are not induced in response to wounding or to fungal infection by P. parasitica. mRNA is expressed in flowers, to a lesser degree in mature leaves and siliques and marginally in seedling roots and bolting stems of mature plants. The catalytic efficiency was in…
Wa8730a010g002350	1.02616	6.19278e-164	8.63398e-160	0.312	0.002
Wa8730a007g004070	1.40127	9.71758e-64	1.35483e-59	0.156	0.002	AT1G11580;AT2G43050;AT1G23200;AT3G27980;AT5G51490	ATPMEPCRA, PMEPCRA;ATPMEPCRD;;;	methylesterase PCR A;Plant invertase/pectin methylesterase inhibitor superfamily;Encodes a pectin methyl esterase involved in embryo development.;Plant invertase/pectin methylesterase inhibitor superfamily;Plant invertase/pectin methylesterase inhibitor superfamily
Wa8730a018g000570	3.13854	0	0	0.625	0.003	AT3G53720	ATCHX20, CHX20	member of Putative Na+/H+ antiporter family. Involved in the osmoregulation through K(+) fluxes and possibly pH modulation of an active endomembrane system in guard cells.
Wa8730a002g008510	2.46656	0	0	0.5	0.003
Wa8730a017g003850	2.20055	7.80758e-195	1.08853e-190	0.375	0.003	AT1G68560	ATXYL1, AXY3, TRG1, XYL1	Encodes a bifunctional alpha-l-arabinofuranosidase/beta-d-xylosidase that belongs to family 3 of glycoside hydrolases.
Wa8730a010g004690	3.67789	1.57614e-183	2.19745e-179	0.344	0.003
Wa8730a014g006750	2.27217	4.81263e-97	6.70977e-93	0.25	0.003	AT4G00360;AT2G45970;AT5G23190	ATT1, CYP86A2;CYP86A8, LCR;CYP86B1	Encodes a member of the CYP86A subfamily of cytochrome p450 genes. Expressed at moderate levels in flowers, leaves, roots and stems.;Encodes a member of the CYP86A subfamily of cytochrome p450 genes. Expressed at moderate levels in flowers, leaves, roots and stems.;cytochrome P450 CYP86B1, nuclear gene for chloroplast product. CYP86B1 is a very long chain fatty acid hydroxylase specifically invol…
Wa8730a013g002820	1.25633	5.31667e-97	7.4125e-93	0.25	0.003	AT1G20380;AT1G76140	;	Prolyl oligopeptidase family protein;Prolyl oligopeptidase family protein
Wa8730a013g005940	1.56967	1.64444e-280	2.29268e-276	0.531	0.004	AT1G01340;AT4G01010;AT2G28260	ACBK1, ATCNGC10, CNGC10;ATCNGC13, CNGC13;ATCNGC15, CNGC15	member of Cyclic nucleotide gated channel family;member of Cyclic nucleotide gated channel family;member of Cyclic nucleotide gated channel family
Wa8730a002g004320	4.17193	1.02306e-170	1.42635e-166	0.375	0.004	AT4G34230;AT4G39330	ATCAD5, CAD-5, CAD5;ATCAD9, CAD9	Encodes a catalytically active cinnamyl alcohol dehydrogenase which uses p-coumaryl aldehyde as a preferred substrate. It can also use sinapyl, caffeyl, coniferyl and d-hydroxyconiferyl aldehydes as substrates.;cinnamyl alcohol dehydrogenase 9
Wa8730a011g003610	1.24869	1.45323e-95	2.02609e-91	0.281	0.004	AT5G61250;AT5G07830	AtGUS1, GUS1;AtGUS2, GUS2	Belongs to the plant glycoside hydrolase family 79. Encodes a protein with several posttranslational modification sites including O-&#946;-GlcNAc attachment sites and serine-, threonine- and tyrosine-phosphorylation sites, suggesting that this protein is extensively modified posttranslationally. The protein is predicted (WoLF PSORT program) to be secreted.;Belongs to the plant glycoside hydrolase…
Wa8730a005g001930	4.47936	4.44504e-64	6.19727e-60	0.219	0.004	AT1G71120;AT5G03810;AT3G16370;AT4G28780;AT3G53100	GLIP6;;;;	Contains lipase signature motif and GDSL domain.;GDSL-motif esterase/acyltransferase/lipase. Enzyme group with broad substrate specificity that may catalyze acyltransfer or hydrolase reactions with lipid and non-lipid substrates.;GDSL-motif esterase/acyltransferase/lipase. Enzyme group with broad substrate specificity that may catalyze acyltransfer or hydrolase reactions with lipid and non-lipid …
Wa8730a003g007260	2.19762	1.33326e-260	1.85883e-256	0.562	0.005	AT1G53830;AT3G14310;AT4G33220;AT2G26440;AT3G43270;AT5G20860;AT3G47400	ATPME2, PME2;ATPME3, OZS2, PME3;ATPME44, PME44;PME12;;;	encodes a pectin methylesterase;encodes a pectin methylesterase, targeted by a cellulose binding protein (CBP) from the parasitic nematode Heterodera schachtii during parasitism.;pectin methylesterase 44;Plant invertase/pectin methylesterase inhibitor superfamily;Plant invertase/pectin methylesterase inhibitor superfamily;Plant invertase/pectin methylesterase inhibitor superfamily;Plant invertase…
Wa8730a008g005110	1.55736	1.90715e-147	2.65895e-143	0.406	0.005
Wa8730a002g010320	1.1135	1.41667e-146	1.97512e-142	0.375	0.005	AT3G04520	THA2	Encodes a threonine aldolase, involved in threonine degradation to glycine. Expressed in vascular tissue through out the plant.
Wa8730a002g005980	1.93098	1.36232e-176	1.89935e-172	0.469	0.006	AT5G06750;AT5G66080;AT3G17090	APD8;APD9;	Protein phosphatase 2C family protein;Protein phosphatase 2C family protein;Protein phosphatase 2C family protein
Wa8730a005g003950	1.46881	6.52315e-164	9.09458e-160	0.438	0.006	AT3G61610;AT4G23730;AT4G25900	;;	Galactose mutarotase-like superfamily protein;Galactose mutarotase-like superfamily protein;Galactose mutarotase-like superfamily protein
Wa8730a003g000490	1.50197	6.20955e-106	8.65736e-102	0.344	0.006	AT1G58370;AT4G33860	ATXYN1, RXF12;	Encodes a protein with xylanase activity.;Glycosyl hydrolase family 10 protein
Wa8730a005g005710	1.2827	2.52018e-47	3.51363e-43	0.219	0.006	AT1G29680;AT5G45690;AT4G18920	;;	Protein of unknown function (DUF1264);Protein of unknown function (DUF1264);Protein of unknown function (DUF1264)
Wa8730a009g002960	1.0663	8.53549e-24	1.19002e-19	0.156	0.006	AT2G38870		Predicted to encode a PR (pathogenesis-related) peptide that belongs to the PR-6 proteinase inhibitor family. Six putative PR-6-type protein encoding genes are found in Arabidopsis: At2g38900, At2g38870, At5g43570, At5g43580, At3g50020 and At3g46860.
Wa8730a012g005070	2.32112	1.33169e-239	1.85664e-235	0.594	0.007	AT4G33680	AGD2	Involved in disease resistance against Pseudomonas syringae. mutants have elevated SA levels, a low level of spontaneous cell death, callose deposition, and enlarged cells in leaves. genetically maps on chr 4 between L23H3 and nga1139.
Wa8730a004g006160	2.52362	1.96676e-202	2.74206e-198	0.531	0.007	AT1G75640;AT5G50000;AT3G22750;AT4G14780;AT5G58520	;;;;	Encodes a Leucine-Rich Repeat Receptor-Like Kinase MUSTACHES (MUS). Regulates stomatal bilateral symmetry.;Protein kinase superfamily protein;Protein kinase superfamily protein;Protein kinase superfamily protein;Protein kinase superfamily protein
Wa8730a014g001320	2.47528	5.25354e-127	7.32448e-123	0.406	0.007	AT3G29970		B12D protein
Wa8730a010g000560	1.2545	8.21718e-65	1.14564e-60	0.281	0.007	AT1G14390;AT4G28650;AT2G02780	;;	Leucine-rich repeat protein kinase family protein;Encodes one of the two putative eLRR kinase closely related to PXY (At1g08590/PXL1 and At4g28650/PXL2). Insertion mutants in either pxl1 or pxl2 do not exhibit an obvious phenotype in the stem; double-mutant combinations of a Col allele, of pxy (pxy-3) with pxl1 and pxl2, generate a more severe vascular phenotype than pxy-3 alone, suggesting that …
Wa8730a006g001180	2.23611	1.05767e-20	1.47461e-16	0.156	0.007	AT3G22120;AT4G15160;AT1G62500	CWLP;;	cell wall-plasma membrane linker protein homolog (CWLP);Bifunctional inhibitor/lipid-transfer protein/seed storage 2S albumin superfamily protein;Bifunctional inhibitor/lipid-transfer protein/seed storage 2S albumin superfamily protein
Wa8730a001g011340	4.19407	0	0	0.75	0.008	AT3G55390		Uncharacterised protein family (UPF0497)
Wa8730a005g005210	2.52543	6.28409e-51	8.76127e-47	0.281	0.009	AT3G12700;AT2G42980;AT1G01300;AT3G61820	NANA;;;	Encodes an aspartic protease has an important regulatory function in chloroplasts that not only influences photosynthetic carbon metabolism but also plastid and nuclear gene expression.;Eukaryotic aspartyl protease family protein;Eukaryotic aspartyl protease family protein;Eukaryotic aspartyl protease family protein
Wa8730a013g000080	1.51961	1.21489e-31	1.69381e-27	0.219	0.009	AT4G19380		Long-chain fatty alcohol dehydrogenase family protein
Wa8730a014g006920	2.92634	2.54422e-31	3.54715e-27	0.219	0.009	AT5G23940	DCR, EMB3009, PEL3	Encodes PERMEABLE LEAVES3 (PEL3), a putative acyl-transferase. Mutation in this locus results in altered trichome phenotype (trcichomes become tangled during leaf expansion). Additional phenotype includes altered cuticle layer.
Wa8730a002g001370	3.62701	0	0	0.844	0.01	AT5G54490;AT2G46600	PBP1;	Encodes a PINOID (PID)-binding protein containing putative EF-hand calcium-binding motifs. The interaction is dependent on the presence of calcium. mRNA expression is up-regulated by auxin. Not a phosphorylation target of PID, likely acts upstream of PID to regulate the activity of this protein in response to changes in calcium levels.;Calcium-binding EF-hand family protein
Wa8730a005g005510	4.36485	6.79694e-80	9.4763e-76	0.375	0.01	AT5G53390;AT3G49190	FOP1, WSD11;	Encodes a member of the bifunctional wax ester synthase/diacylglycerol acyltransferase gene family, WSD11, which is expressed in elongating petals and localized to the plasma membrane.;O-acyltransferase (WSD1-like) family protein
Wa8730a005g002610	1.91395	9.49998e-58	1.32449e-53	0.312	0.01	AT2G36710;AT5G19730	;	Pectin lyase-like superfamily protein;Pectin lyase-like superfamily protein
Wa8730a003g003700	5.39732	6.26556e-96	8.73545e-92	0.438	0.011	AT1G18580;AT5G47780;AT5G15780	GAUT11;GAUT4;	Encodes a protein with putative galacturonosyltransferase activity.;Encodes a protein with putative galacturonosyltransferase activity.;Pollen Ole e 1 allergen and extensin family protein
Wa8730a005g006030	1.55051	1.90059e-83	2.6498e-79	0.406	0.011	AT1G32240;AT2G42660	KAN2;	Encodes a member of the KANADI family of putative transcription factors. Together with KAN1, this gene appears to be involved in the development of the carpel and the outer integument of the ovule.Along with KAN1 and KAN4 appears to regulate the proper localization of PIN1 in early embryogenesis.;Homeodomain-like superfamily protein
Wa8730a016g003050	2.79391	4.42828e-53	6.17391e-49	0.312	0.011	AT2G01340;AT1G71015;AT5G37840	At17.1;;	Encodes a protein whose expression is responsive to nematode infection.;;
Wa8730a005g002240	2.40786	6.17961e-50	8.61561e-46	0.312	0.012	AT1G72970;AT5G51950;AT1G12570	EDA17, HTH;;	Originally identified as a mutation that causes floral organs to fuse together. About 10-20% of mutants also have defects in ovules. Mutants have reduced fertility most likely as because of fusions that pistil emergence. The protein has similarity to the mandelonitrile lyase family of FAD containing oxidoreductases and is predicted to be secreted (SignalP).It is expressed in all tissue layers of …
Wa8730a009g000690	1.58006	1.12319e-37	1.56595e-33	0.281	0.013	AT3G46180;AT5G59740;AT5G02580;AT3G55240	ATUTR5, UTR5;;;	UDP-galactose transporter 5;UDP-N-acetylglucosamine (UAA) transporter family;Plant protein 1589 of unknown function;Overexpression leads to PEL (Pseudo-Etiolation in Light) phenotype.
Wa8730a004g008540	1.39777	4.07965e-37	5.68785e-33	0.281	0.013	AT1G49490;AT3G22800;AT5G25550;AT4G28380;AT3G24480	;;;;	Leucine-rich repeat (LRR) family protein;Leucine-rich repeat (LRR) family protein;Leucine-rich repeat (LRR) family protein;Leucine-rich repeat (LRR) family protein;Leucine-rich repeat (LRR) family protein
Wa8730a001g002240	1.51488	8.37728e-101	1.16796e-96	0.5	0.014	AT2G48010;AT1G54820;AT1G69730	RKF3;;	receptor-like serine/threonine kinase (RKF3);Protein kinase superfamily protein;Wall-associated kinase family protein
Wa8730a019g000880	1.29612	4.2205e-51	5.88421e-47	0.344	0.014	AT3G45640;AT1G01560;AT1G07880;AT5G18700	ATMAPK3, ATMPK3, MPK3;ATMPK11, MPK11;ATMPK13;EMB3013, RUK	Encodes a mitogen-activated kinase whose mRNA levels increase in response to touch, cold, salinity stress and chitin oligomers.Also functions in ovule development. Heterozygous MPK3 mutants in a homozygous MPK6 background are female sterile due to defects in integument development. MPK3 can be dephosphorylated by MKP2 in vitro.;member of MAP Kinase;member of MAP Kinase;Encodes a microtubule-assoc…
Wa8730a004g004450	6.66472	1.04245e-145	1.45338e-141	0.625	0.015	AT3G23450
Wa8730a001g010690	1.31085	8.23275e-47	1.14781e-42	0.344	0.015	AT3G12890;AT5G59990	ASML2;	Encodes a protein belonging to a class of CCT (CONSTANS, CONSTANS-like, TOC1) domain proteins. The protein contains a 43 amino acid-long sequence with high homology to the CCT domain but does not have any B-box or GATA-type zinc finger domains. Functions as a transcriptional activator and regulates the expression of at least a subset of sugar-inducible genes.;CCT motif family protein
Wa8730a004g004460	7.66053	1.30245e-139	1.81588e-135	0.625	0.016	AT4G21620;AT3G23450	;	glycine-rich protein;
Wa8730a002g003570	1.62678	9.03154e-10	1.25918e-05	0.156	0.016	AT5G42180;AT5G66390;AT1G71695;AT5G24070;AT4G33420;AT2G38390;AT5G51890;AT2G18140;AT1G77100;AT2G35380;AT4G26010;AT3G03670	PER64;PRX72;;;;;;;;;;	Peroxidase superfamily protein;Encodes a peroxidase that is involved in lignin biosynthesis.;Peroxidase superfamily protein;Peroxidase superfamily protein;Peroxidase superfamily protein;Peroxidase superfamily protein;encodes peroxidase involved in the lignification of tracheary elements (TE) in roots;Peroxidase superfamily protein;Peroxidase superfamily protein;Peroxidase superfamily protein;Pero…
Wa8730a006g003780	1.57101	2.29797e-96	3.20383e-92	0.531	0.017
Wa8730a012g001370	2.26817	1.18163e-49	1.64743e-45	0.375	0.017
Wa8730a016g004070	1.14767	2.44851e-18	3.41372e-14	0.219	0.017	AT1G17420;AT1G72520;AT1G67560	ATLOX3, LOX3;ATLOX4, LOX4;ATLOX6, LOX6	Lipoxygenase;PLAT/LH2 domain-containing lipoxygenase family protein;PLAT/LH2 domain-containing lipoxygenase family protein
Wa8730a003g005720	1.58024	1.4712e-13	2.05115e-09	0.188	0.017	AT5G43580	UPI	Predicted to encode a PR (pathogenesis-related) peptide that belongs to the PR-6 proteinase inhibitor family. Six putative PR-6-type protein encoding genes are found in Arabidopsis: At2g38900, At2g38870, At5g43570, At5g43580, At3g50020 and At3g46860.
Wa8730a006g002230	1.43666	4.32001e-74	6.02296e-70	0.469	0.018	AT4G14480;AT5G14720	;	Encodes a putative Ser/Thr protein kinase, BLUS1 (BLUE LIGHT SIGNALING1). BLUS1 functions as a phototropin substrate and primary regulator of stomatal control to enhance photosynthetic CO2 assimilation under natural light conditions.;Protein kinase superfamily protein
Wa8730a019g002350	1.30066	1.83706e-27	2.56123e-23	0.281	0.018	AT4G15610		Uncharacterised protein family (UPF0497)
Wa8730a014g004020	2.00553	1.48119e-129	2.06508e-125	0.656	0.019	AT4G00295;AT4G11350;AT5G41460;AT1G07850;AT1G01570	NA;;;;	NA;Protein of unknown function (DUF604);Protein of unknown function (DUF604);Protein of unknown function (DUF604);Protein of unknown function (DUF604)
Wa8730a001g011360	1.94742	6.75335e-31	9.41552e-27	0.312	0.019	AT4G11650;AT5G02140;AT2G28790	ATOSM34, OSM34;;	osmotin-like protein;Pathogenesis-related thaumatin superfamily protein;Pathogenesis-related thaumatin superfamily protein
Wa8730a003g000710	3.41372	4.51609e-26	6.29633e-22	0.281	0.019	AT1G49430;AT1G64400;AT4G23850;AT1G47550	LACS2, LRD2;LACS3;LACS4;SEC3A	Encodes a long chain acyl-CoA synthetase that catalyzes the synthesis of omega-hydroxy fatty acyl-CoA intermediates in the pathway to cutin synthesis. Required for repression of lateral root formation.;AMP-dependent synthetase and ligase family protein;AMP-dependent synthetase and ligase family protein;Encodes a member of the exocyst complex gene family. The exocyst is a protein complex involved …
Wa8730a016g002640	2.67512	1.75201e-116	2.44265e-112	0.625	0.02
Wa8730a014g003590	2.2432	1.70655e-105	2.37927e-101	0.594	0.02	AT4G13420	ATHAK5, HAK5	Encodes a protein of the KUP/HAK/KT potassium channel class that is upregulated in the roots by K levels.
Wa8730a005g000240	1.8467	1.24841e-72	1.74054e-68	0.5	0.021
Wa8730a002g009940	3.3333	6.5429e-28	9.12212e-24	0.312	0.022	AT3G23450
Wa8730a016g004660	1.27835	2.06277e-13	2.87592e-09	0.219	0.023	AT1G72390	PHL
Wa8730a014g000010	4.11684	1.81357e-73	2.52848e-69	0.531	0.024	AT4G37870;AT5G65690	PCK1, PEPCK;PCK2, PEPCK	Encodes a putative phosphoenolpyruvate carboxykinase (ATP-dependent).;Encodes a putative phosphoenolpyruvate carboxykinase (ATP-dependent).
Wa8730a010g004020	1.38686	2.00839e-40	2.80009e-36	0.406	0.025	AT5G16480	AtPFA-DSP5, PFA-DSP5	Encodes an atypical dual-speci&#64257;city phosphatase.
Wa8730a001g009590	1.1884	2.36069e-12	3.29128e-08	0.219	0.025	AT4G31760		Peroxidase superfamily protein
Wa8730a019g002360	1.32782	1.31741e-14	1.83673e-10	0.25	0.027
Wa8730a001g010560	1.35294	1.40106e-10	1.95336e-06	0.219	0.029	AT3G45850;AT2G37420;AT2G28620	;;	P-loop containing nucleoside triphosphate hydrolases superfamily protein;ATP binding microtubule motor family protein;Mutants have radially swollen roots but do not exhibit defects in abundance or orientation of cortical microtubules, nor are microfibrils reduced. Cellulose synthesis is also unchanged with respect to wild type. There is a disruption in the normal pattern of cell wall placement.
Wa8730a001g005050	2.62814	4.13374e-57	5.76326e-53	0.531	0.031	AT3G12820;AT5G35550;AT3G28910;AT1G08810	AtMYB10, MYB10;ATMYB123, ATTT2, MYB123, TT2;ATMYB30, MYB30;AtMYB60, MYB60	Member of the R2R3 factor gene family.;TT2 encodes a R2R3 MYB domain putative transcription factor that acts as a key determinant in the proanthocyanidin accumulation of developing seed. It is thought that a ternary complex composed of TT2, TT8 and TTG1 is necessary for correct expression of BAN in seed endothelium.;transcription factor myb homologue;putative transcription factor of the R2R3-MYB …
Wa8730a006g000630	1.0511	1.03877e-36	1.44825e-32	0.438	0.032	AT4G26970	ACO2	Encodes an aconitase that can catalyze the conversion of citrate to isocitrate through a cis-aconitate intermediate, indicating that it may participate in the TCA cycle and other primary metabolic pathways. The protein is believed to accumulate in the mitochondria and the cytosol. It affects CSD2 (At2g28190 - a superoxide dismutase) transcript levels and may play a role in the response to oxidati…
Wa8730a009g003360	1.37198	1.1344e-36	1.58158e-32	0.438	0.033	AT4G01230;AT3G61560;AT3G18260	;;	Reticulon family protein;Reticulon family protein;Reticulon family protein
Wa8730a016g004810	2.08245	3.21495e-27	4.48228e-23	0.375	0.033	AT1G53830;AT3G14310;AT4G33220;AT2G26440;AT5G20860;AT3G43270;AT1G02810;AT4G15980	ATPME2, PME2;ATPME3, OZS2, PME3;ATPME44, PME44;PME12;;;;	encodes a pectin methylesterase;encodes a pectin methylesterase, targeted by a cellulose binding protein (CBP) from the parasitic nematode Heterodera schachtii during parasitism.;pectin methylesterase 44;Plant invertase/pectin methylesterase inhibitor superfamily;Plant invertase/pectin methylesterase inhibitor superfamily;Plant invertase/pectin methylesterase inhibitor superfamily;Plant invertase…
Wa8730a001g000860	1.13431	4.57414e-26	6.37727e-22	0.375	0.033	AT5G26770;AT3G05830;AT1G09470	;;	NEAP2 is a member of a small family containing coiled-coil domains, a nuclear localization signal and a C-terminal predicted transmembrane domain. It localizes to the nuclear periphery. Mutants have altered nuclear morphology and chromatin structure.;Encodes alpha-helical IF (intermediate filament)-like protein.;NEAP3 is a member of a small family containing coiled-coil domains, a nuclear localiz…
Wa8730a020g001720	1.02275	4.848e-15	6.75908e-11	0.281	0.033	AT3G26940;AT5G13160;AT3G59350;AT1G06700;AT2G43230	CDG1;PBS1;;;	Receptor-like cytoplasmic kinase, RLCKVII subfamily. Overexpression causes abnormal differential and elongation growth after organ differentiation.;Mutant is defective in perception of Pseudomonas syringae avirulence gene avrPphB. Encodes a putative serine-threonine kinase.;Protein kinase superfamily protein;Protein kinase superfamily protein;Protein kinase superfamily protein
Wa8730a014g000040	1.13714	1.35359e-14	1.88718e-10	0.281	0.033
Wa8730a013g000360	1.31284	5.15319e-09	7.18458e-05	0.219	0.033
Wa8730a002g007790	1.22472	9.52329e-35	1.32774e-30	0.438	0.034	AT1G63520		Protein of unknown function (DUF3527)
Wa8730a002g004710	1.15481	1.96809e-21	2.74391e-17	0.344	0.034	AT4G24230	ACBP3	acyl-CoA-binding protein ACBP3. Localized extracellularly in transiently expressed tobacco BY-2 cells and onion epidermal cells. Binds arachidonyl-CoA with high affinity.
Wa8730a004g008520	2.264	5.48306e-43	7.64448e-39	0.5	0.036	AT3G16340;AT2G26910;AT1G15520	ABCG29, ATPDR1, AtABCG29, PDR1;ABCG32, ATPDR4, AtABCG32, PDR4, PEC1;ABCG40, ATABCG40, ATPDR12, PDR12	Encodes a p-coumaryl alcohol exporter involved in lignin biosynthesis.;Encodes a member of the PLEIOTROPIC DRUG RESISTANCE family of ATP binding cassette transporters. Required for the formation of a functional cuticle.;ABC transporter family involved in ABA transport and resistance to lead. Localizes to plasma membrane. Upregulated by lead. Expressed in leaves, flowers, stomata and roots.
Wa8730a002g004860	5.33015	7.05526e-14	9.83644e-10	0.281	0.036	AT2G27380;AT1G20130	ATEPR1, EPR1;	Encodes an extensin like gene involved in seed germination.;GDSL-motif esterase/acyltransferase/lipase. Enzyme group with broad substrate specificity that may catalyze acyltransfer or hydrolase reactions with lipid and non-lipid substrates.
Wa8730a011g000160	2.86855	7.66074e-67	1.06806e-62	0.625	0.037	AT4G19420;AT5G45280	;	Pectinacetylesterase family protein;Pectinacetylesterase family protein
Wa8730a019g003810	2.52863	1.33627e-84	1.86303e-80	0.719	0.038
Wa8730a014g003110	2.11662	9.67602e-23	1.34903e-18	0.375	0.039	AT4G19420;AT5G23870;AT5G45280;AT3G62060	;;;	Pectinacetylesterase family protein;Encodes a pectin acetylesterase that removes cell wall acetate associated with pectin formation in Arabidopsis leaves.;Pectinacetylesterase family protein;Pectinacetylesterase family protein
Wa8730a011g002520	1.64017	3.40164e-19	4.74256e-15	0.344	0.039	AT5G52810		NAD(P)-binding Rossmann-fold superfamily protein
Wa8730a001g003660	3.83706	2.52555e-30	3.52113e-26	0.438	0.041	AT3G14310;AT2G26450	ATPME3, OZS2, PME3;	encodes a pectin methylesterase, targeted by a cellulose binding protein (CBP) from the parasitic nematode Heterodera schachtii during parasitism.;Plant invertase/pectin methylesterase inhibitor superfamily
Wa8730a005g000790	3.02214	6.07939e-15	8.47588e-11	0.312	0.041	AT3G16340;AT2G28070;AT2G26910;AT2G36380;AT1G15520	ABCG29, ATPDR1, AtABCG29, PDR1;ABCG3;ABCG32, ATPDR4, AtABCG32, PDR4, PEC1;ABCG34, ATPDR6, PDR6;ABCG40, ATABCG40, ATPDR12, PDR12	Encodes a p-coumaryl alcohol exporter involved in lignin biosynthesis.;ABC-2 type transporter family protein;Encodes a member of the PLEIOTROPIC DRUG RESISTANCE family of ATP binding cassette transporters. Required for the formation of a functional cuticle.;pleiotropic drug resistance 6;ABC transporter family involved in ABA transport and resistance to lead. Localizes to plasma membrane. Upregula…
Wa8730a001g001240	1.30712	4.39919e-24	6.13335e-20	0.406	0.042	AT2G40840	DPE2	Encodes a cytosolic protein with transglucosidase and amylomaltase activity. It is an essential component of the pathway from starch to sucrose and cellular metabolism in leaves at night. The protein binds to heteroglycans and utilizes glucose, mannose and xylose as acceptors. Fucose and galactose can also act as acceptors but less efficiently than the previous three. It was also was also recentl…
Wa8730a008g000020	3.20439	1.74072e-17	2.42691e-13	0.344	0.043
Wa8730a011g000940	1.80185	4.29623e-14	5.98981e-10	0.312	0.043	AT3G21240;AT1G65060	4CL2, AT4CL2;4CL3	encodes an isoform of 4-coumarate:CoA ligase (4CL), which is involved in the last step of the general phenylpropanoid pathway. The catalytic efficiency was in the following (descending) order: p-coumaric acid, caffeic acid, ferulic acid, 5-OH-ferulic acid and cinnamic acid. At4CL2 was unable to use sinapic acid as substrate.;encodes an isoform of 4-coumarate:CoA ligase (4CL), which is involved in…
Wa8730a016g001040	2.40392	5.72918e-24	7.98762e-20	0.406	0.044	AT5G10050;AT5G65205	;	NAD(P)-binding Rossmann-fold superfamily protein;NAD(P)-binding Rossmann-fold superfamily protein
Wa8730a020g002790	1.01332	4.08622e-11	5.69701e-07	0.281	0.044	AT1G67730;AT1G24470	ATKCR1, KCR1, YBR159;ATKCR2, KCR2	Encodes one of the two Arabidopsis homologues to YBR159w encoding a S. cerevisiae beta-ketoacyl reductase (KCR), which catalyzes the first reduction during VLCFA (very long chain fatty acids, >18 carbon) elongation: KCR1 (At1g67730), KCR2 (At1g24470). Complementation of the yeast ybr159Delta mutant demonstrated that the two KCR proteins are divergent and that only AtKCR1 can restore heterologous …
Wa8730a011g001250	1.49656	1.71398e-19	2.38964e-15	0.375	0.045	AT5G46540;AT4G18050	ABCB7, PGP7;ABCB9, PGP9	P-glycoprotein 7;P-glycoprotein 9
Wa8730a008g004250	1.10065	2.52003e-18	3.51342e-14	0.375	0.046	AT1G22015;AT2G32430;AT1G11730;AT4G26940;AT1G05170	DD46;;;;	Galactosyltransferase family protein;Galactosyltransferase family protein;Galactosyltransferase family protein;Galactosyltransferase family protein;Galactosyltransferase family protein
Wa8730a004g002930	1.14385	1.07491e-12	1.49864e-08	0.312	0.046	AT5G42180;AT4G33420;AT4G25980;AT4G17690;AT4G36430;AT5G19880;AT4G11290	PER64;;;;;;	Peroxidase superfamily protein;Peroxidase superfamily protein;Peroxidase superfamily protein;Peroxidase superfamily protein;Peroxidase superfamily protein;Peroxidase superfamily protein;Peroxidase superfamily protein
Wa8730a009g005480	1.11178	2.99024e-06	0.0416899	0.219	0.048	AT3G23050;AT4G14550;AT3G04730;AT3G15540	AXR2, IAA7;IAA14, SLR;IAA16;IAA19, MSG2	Transcription regulator acting as repressor of auxin-inducible gene expression. Plays role in the control of gravitropic growth and development in light-grown seedlings. Auxin induces the degradation of the protein in a dosage-dependent manner in a process mediated by AtRac1. Auxin induced the relocalization of the protein within the nucleus from a diffused nucleoplasmic pattern to a discrete par…
Wa8730a013g000470	1.00678	8.00348e-10	1.11584e-05	0.281	0.049
Wa8730a012g005050	1.56068	2.35792e-27	3.28741e-23	0.469	0.051	AT4G08550		electron carriers;protein disulfide oxidoreductases
Wa8730a011g002070	1.58445	4.50318e-42	6.27833e-38	0.594	0.052	AT4G17615;AT5G47100;AT5G24270;AT1G64480	ATCBL1, CBL1, SCABP5;ATCBL9, CBL9;ATSOS3, CBL4, SOS3;CBL8	Member of AtCBL (Calcineurin B-like Calcium Sensor Proteins) family. Protein level is increased upon high salt, mannitol, and cold stresses. CBL1 interacts with CIPK23 and recruits the kinase to the plasma membrane where the substrate(s) of CIPK23 may reside. CBL1 localization is regulated by protein modification including myristolation and acylation.;member of AtCBLs (Calcineurin B-like Calcium …
Wa8730a005g003040	1.14718	4.09431e-16	5.70828e-12	0.375	0.053	AT4G32790;AT5G11610;AT5G25820;AT5G19670	;;;	Exostosin family protein;Exostosin family protein;Exostosin family protein;Exostosin family protein
Wa8730a007g002340	6.78412	3.13537e-48	4.37133e-44	0.625	0.054	AT5G48485	DIR1	encodes a putative apoplastic lipid transfer protein that is involved in systemic acquired resistance. Mutants in this gene exhibit wild-type local resistance to avirulent and virulent Pseudomonas syringae, but pathogenesis-related gene expression is abolished in uninoculated distant leaves and fail to develop SAR to virulent Pseudomonas or Peronospora parasitica.
Wa8730a007g006280	2.03148	4.15842e-28	5.79767e-24	0.5	0.054	AT1G77120;AT1G22440;AT5G42250	ADH, ADH1, ATADH, ATADH1;;	Catalyzes the reduction of acetaldehyde using NADH as reductant. Requires zinc for activity. Dimer. Anaerobic response polypeptide (ANP). Fermentation. The protein undergoes thiolation following treatment with the oxidant tert-butylhydroperoxide.;Zinc-binding alcohol dehydrogenase family protein;Zinc-binding alcohol dehydrogenase family protein
Wa8730a003g000940	1.22597	5.97505e-28	8.33041e-24	0.5	0.054	AT5G65890	ACR1	Member of ACT domain containing protein family. ACT domains are amino acid binding domains. Shows strongest expression in flowers and siliques.
Wa8730a016g002100	1.56582	5.46462e-31	7.61877e-27	0.531	0.056	AT1G45207;AT4G36970	;	Remorin family protein;Remorin family protein
Wa8730a010g005560	2.78197	2.17465e-32	3.03189e-28	0.531	0.057	AT4G26330;AT5G59090	ATSBT3.18, UNE17;ATSBT4.12, SBT4.12	Subtilisin-like serine endopeptidase family protein;subtilase 4.12
Wa8730a009g001050	1.21459	2.29762e-12	3.20334e-08	0.344	0.057	AT5G01320		Thiamine pyrophosphate dependent pyruvate decarboxylase family protein
Wa8730a009g006750	2.13963	8.56331e-24	1.1939e-19	0.469	0.058	AT3G49680;AT1G50090;AT1G68790;AT5G65770	ATBCAT-3, BCAT3;AtBCAT7, BCAT7;CRWN3, LINC3;CRWN4, LINC4	Encodes a chloroplast branched-chain amino acid aminotransferase. Complements the yeast leu/iso-leu/val auxotrophy mutant.;D-aminoacid aminotransferase-like PLP-dependent enzymes superfamily protein;little nuclei3;Encodes a protein that localizes to the nuclear periphery and affects nuclear morphology.
Wa8730a010g001470	1.35782	3.15402e-20	4.39733e-16	0.438	0.059	AT5G25770		alpha/beta-Hydrolases superfamily protein
Wa8730a009g001170	2.14609	2.71202e-17	3.78109e-13	0.406	0.059	AT3G55500;AT5G05290;AT5G39300;AT2G37640;AT2G28950;AT2G40610;AT5G02260	ATEXP16, ATEXPA16, ATHEXP, EXP16, EXPA16;ATEXP2, ATEXPA2, ATHEXP, EXP2, EXPA2;ATEXP25, ATEXPA25, ATHEXP, EXP25, EXPA25;ATEXP3, ATEXPA3, ATHEXP, EXP3;ATEXP6, ATEXPA6, ATHEXP, EXPA6;ATEXP8, ATEXPA8, ATHEXP, EXP8, EXPA8;ATEXP9, ATEXPA9, ATHEXP, EXP9, EXPA9	expansin-like protein. Naming convention from the Expansin Working Group (Kende et al, 2004. Plant Mol Bio). Involved in the formation of nematode-induced syncytia in roots of Arabidopsis thaliana.;Encodes an expansin. Naming convention from the Expansin Working Group (Kende et al, 2004. Plant Mol Bio);member of Alpha-Expansin Gene Family. Naming convention from the Expansin Working Group (Kende …
Wa8730a001g005420	1.30295	2.81329e-24	3.92229e-20	0.5	0.062	AT3G13380;AT4G20140;AT5G38280;AT1G06840;AT2G33170;AT5G35370;AT3G51990;AT5G02070	BRL3;GSO1;PR5K;;;;;	Similar to BRI, brassinosteroid receptor protein.;Encodes GASSHO1 (GSO1), a putative leucine-rich repeat transmembrane-type receptor kinase. GSO1 and a homolog GSO2 (At5g44700) are required for the formation of a normal epidermal surface during embryogenesis.;putative receptor serine/threonine kinase PR5K (PR5K) mRNA, PR5-like receptor kinase;Leucine-rich repeat protein kinase family protein;Leuc…
Wa8730a012g002350	1.03271	4.19037e-13	5.84221e-09	0.375	0.062	AT5G04710		Zn-dependent exopeptidases superfamily protein
Wa8730a019g003690	3.71771	4.79099e-75	6.6796e-71	0.844	0.064	AT3G09410;AT2G46930;AT3G05910;AT1G57590;AT1G09550;AT5G26670	;;;;;	Pectinacetylesterase family protein;Encodes a pectin acetylesterase that removes cell wall acetate associated with pectin formation in Arabidopsis leaves.;Pectinacetylesterase family protein;Pectinacetylesterase family protein;Pectinacetylesterase family protein;Pectinacetylesterase family protein
Wa8730a002g006470	2.91024	6.03469e-63	8.41356e-59	0.781	0.065	AT5G24380;AT5G53550;AT5G41000;AT3G17650;AT1G65730	ATYSL2, YSL2;ATYSL3, YSL3;AtYSL4, YSL4;PDE321, YSL5;YSL7	closest Arabidopsis homolog of Zea maize metal-phytosiderophore/metal-nicotianamine transporter ZmYS1;YELLOW STRIPE like 3;Arabidopsis thaliana metal-nicotianamine transporter YSL4;Arabidopsis thaliana metal-nicotianamine transporter YSL5;Arabidopsis thaliana metal-nicotianamine transporter YSL4
Wa8730a012g003560	1.03434	1.40919e-10	1.9647e-06	0.344	0.066	AT3G43220;AT3G14205;AT1G17340;AT5G20840	;;;	Phosphoinositide phosphatase family protein;Phosphoinositide phosphatase family protein;Phosphoinositide phosphatase family protein;Phosphoinositide phosphatase family protein
Wa8730a005g003560	1.4103	5.91918e-15	8.25252e-11	0.406	0.067	AT4G01100;AT1G79900;AT4G11440	ADNT1;ATMBAC2, BAC2;	adenine nucleotide transporter 1;encodes a mitochondrial ornithine transporter that exports ornithine from the mitochondria to the cytosol;Mitochondrial substrate carrier family protein
Wa8730a004g002920	1.80047	2.24161e-14	3.12525e-10	0.406	0.067	AT5G42180;AT4G33420;AT4G25980;AT4G17690;AT4G36430;AT5G19880;AT4G11290	PER64;;;;;;	Peroxidase superfamily protein;Peroxidase superfamily protein;Peroxidase superfamily protein;Peroxidase superfamily protein;Peroxidase superfamily protein;Peroxidase superfamily protein;Peroxidase superfamily protein
Wa8730a002g008350	1.03518	1.65117e-10	2.30207e-06	0.344	0.067	AT3G23170
Wa8730a005g004540	1.50308	3.87291e-22	5.39961e-18	0.5	0.069	AT5G53030;AT4G27810	;	;
Wa8730a010g000100	1.68249	6.60955e-14	9.21503e-10	0.406	0.069	AT3G16340;AT3G53480	ABCG29, ATPDR1, AtABCG29, PDR1;ABCG37, ATPDR9, PDR9, PIS1	Encodes a p-coumaryl alcohol exporter involved in lignin biosynthesis.;Negative regulator of auxin polar transport inhibitors. ABCG37 regulates auxin distribution and homeostasis in roots by excluding IBA from the root apex, but does not act directly in basipetal transport. ABCG37 and ABCG36 act redundantly at outermost root plasma membranes and, transport IBA out of the cells.
Wa8730a009g002480	1.71789	2.1491e-08	0.000299627	0.312	0.069	AT1G02860;AT2G38920	BAH1, NLA;	Encodes a likely ubiquitin E3 ligase with RING and SPX domains that is involved in mediating immune responses. Targeted by MIR827.;SPX (SYG1/Pho81/XPR1) domain-containing protein / zinc finger (C3HC4-type RING finger) protein-related
Wa8730a009g003090	1.37619	6.51238e-19	9.07956e-15	0.469	0.071	AT2G41140;AT3G56760	ATCBK3, ATCRK1, CRK1;	Encodes CDPK-related kinase 1 (CRK1).;Protein kinase superfamily protein
Wa8730a012g004060	1.15946	7.94666e-23	1.10792e-18	0.531	0.072	AT5G37500;AT3G02850	GORK;SKOR	Encodes a guard cell outward potassium channel. Belongs to the Shaker family K+ channel. This family includes five groups based on phylogenetic analysis (FEBS Letters (2007) 581: 2357): I (inward rectifying channel): AKT1 (AT2G26650), AKT5 (AT4G32500) and SPIK (also known as AKT6, AT2G25600); II (inward rectifying channel): KAT1 (AT5G46240) and KAT2 (AT4G18290); III (weakly inward rectifying chan…
Wa8730a013g005170	1.24821	7.59504e-21	1.0589e-16	0.5	0.073	AT2G20240	TRM17	Protein of unknown function (DUF3741)
Wa8730a007g007600	1.44773	1.92244e-09	2.68027e-05	0.344	0.074	AT5G64700;AT3G18200;AT3G53210	UMAMIT21;UMAMIT4;UMAMIT6	nodulin MtN21-like transporter family protein;nodulin MtN21-like transporter family protein;nodulin MtN21-like transporter family protein
Wa8730a001g009230	3.25257	6.30574e-27	8.79147e-23	0.562	0.075	AT1G50520;AT4G12330;AT5G48000;AT1G13090	CYP705A27;CYP706A7;CYP708, CYP708A2, THAH, THAH1;CYP71B28	member of CYP705A;member of CYP706A;Encodes a member of the CYP708A family of cytochrome P450 enzymes. THAH appears to add a hydroxyl group to the triterpene thalianol. thah1 mutants have an elevated accumulation of thalianol. thah1-1 mutants have longer roots than wild type plants. Thalian-diol and desaturated thalian-diol are lost from the root extracts of thah1-1 mutants. Overexpression of the…
Wa8730a007g004590	1.07853	3.68591e-12	5.1389e-08	0.406	0.077	AT1G28420;AT1G72070	HB-1, RLT1;	homeobox-1;Chaperone DnaJ-domain superfamily protein
Wa8730a002g001920	1.04604	8.44664e-12	1.17763e-07	0.406	0.077	AT5G56840		myb-like transcription factor family protein
Wa8730a017g001860	1.33247	1.34411e-13	1.87396e-09	0.438	0.079	AT2G45240	MAP1A	Encodes a cytoplasmic MAP1 like methionine aminopeptidase which is involved in removing the N-terminal methionine from proteins. Induced mutants using RNAi technology which knocks out both MAP1 and MAP2 like genes show abnormal development.
Wa8730a005g004400	1.45284	1.22621e-10	1.70958e-06	0.375	0.079	AT5G41810
Wa8730a002g007370	1.01201	1.72306e-11	2.40229e-07	0.406	0.082	AT2G20740		Tetraspanin family protein
Wa8730a007g003940	2.24619	3.23505e-10	4.51031e-06	0.375	0.082	AT5G13930	ATCHS, CHS, TT4	Encodes chalcone synthase (CHS), a key enzyme involved in the biosynthesis of flavonoids. Required for the accumulation of purple anthocyanins in leaves and stems. Also involved in the regulation of auxin transport and the modulation of root gravitropism.
Wa8730a004g008470	1.66735	1.28944e-26	1.79774e-22	0.594	0.083	AT2G26650;AT4G32650	AKT1, ATAKT1, KT1;ATKC1, AtLKT1, KAT3, KC1	Encodes AKT1, a member of the Shaker family inward rectifying potassium channel predominantly expressed in predominantly in root hairs and root endodermis. This family includes five groups based on phylogenetic analysis (FEBS Letters (2007) 581: 2357): I (inward rectifying channel): AKT1 (AT2G26650), AKT5 (AT4G32500) and SPIK (also known as AKT6, AT2G25600); II (inward rectifying channel): KAT1 (…
Wa8730a009g001620	2.12904	1.03086e-06	0.0143723	0.312	0.083	AT5G05270	AtCHIL, CHIL	Chalcone-flavanone isomerase family protein
Wa8730a003g002920	1.2553	1.72661e-19	2.40724e-15	0.531	0.084	AT1G26560	BGLU40	beta glucosidase 40
Wa8730a013g000830	1.45942	1.32835e-13	1.85199e-09	0.438	0.085	AT5G47060;AT2G44670;AT4G17670	;;	Protein of unknown function (DUF581);Protein of unknown function (DUF581);Protein of unknown function (DUF581)
Wa8730a006g001110	3.44686	1.79673e-30	2.505e-26	0.625	0.086	AT4G15160;AT1G62500;AT3G22142	;;	Bifunctional inhibitor/lipid-transfer protein/seed storage 2S albumin superfamily protein;Bifunctional inhibitor/lipid-transfer protein/seed storage 2S albumin superfamily protein;Encodes a Protease inhibitor/seed storage/LTP family protein
Wa8730a019g001980	1.35488	3.16061e-20	4.40652e-16	0.531	0.086	AT1G08500	AtENODL18, ENODL18	early nodulin-like protein 18
Wa8730a011g003010	1.00576	6.60233e-17	9.20497e-13	0.5	0.086	AT4G20070	AAH, ATAAH	The gene encoding Arabidopsis thaliana Allantoate Amidohydrolase (AtAAH)which catalyzes the allantoate deiminase reaction (EC 3.5.3.9)is expressed in all parts of the plant being consistent with a function in purine turnover in Arabidopsis.
Wa8730a010g006440	1.34589	6.11916e-08	0.000853133	0.344	0.087
Wa8730a007g002130	1.43545	2.92003e-09	4.07111e-05	0.375	0.088
Wa8730a001g005270	1.34642	5.51824e-21	7.69353e-17	0.562	0.089
Wa8730a005g003670	1.72936	6.53152e-26	9.10624e-22	0.625	0.093	AT3G61580;AT2G46210	AtSLD1, SLD1;AtSLD2, SLD2	Fatty acid/sphingolipid desaturase;Fatty acid/sphingolipid desaturase
Wa8730a010g004800	1.15835	1.99301e-08	0.000277865	0.375	0.093	AT5G38860	BIM3	Encodes BES1-INTERACTING MYC-LIKE 3 (BIM3), a PAR1 (PHYTOCHROME RAPIDLY REGULATED 1)-interacting protein that positively modulates the shade avoidance syndrome in Arabidopsis seedlings.
Wa8730a002g006920	1.09977	1.81985e-16	2.53723e-12	0.531	0.098	AT3G19960;AT5G54280;AT1G50360;AT4G27370	ATM1;ATM2, ATM4, ATMYOS1;ATVIIIA, VIIIA;ATVIIIB, VIIIB	member of Myosin-like proteins;Type VII myosin gene;member of Myosin-like proteins;member of Myosin-like proteins
Wa8730a019g002310	1.45125	6.25065e-11	8.71466e-07	0.438	0.098	AT4G27830;AT1G45191;AT3G21370;AT3G09260;AT5G25980	AtBGLU10, BGLU10;BGLU1;BGLU19;BGLU23, LEB, PSR3.1, PYK10;BGLU37, TGG2	Encodes a beta-glucosidase that may be responsible for acyl-glucose-dependent anthocyanin glucosyltransferase activity in Arabidopsis. In vitro efforts to demonstrate AAGT activity for BGLU10 have been unsuccessful but experiments with mutants in this gene suggest at least an indirect involvement in anthocyanin formation.;beta-glucosidase related protein, similar to beta-glucosidase GI:3820531 fr…
Wa8730a004g005990	1.4537	1.67435e-09	2.33438e-05	0.406	0.099	AT5G46340;AT2G34410;AT1G29890	RWA1;RWA3;RWA4	Encodes a homolog of the protein Cas1p known to be involved in polysaccharide O-acetylation in Cryptococcus neoformans. Has high similarity to RWA2 whose mutant displays reduced acetylation. The protein is expressed in the Golgi and is involved in the acetylation of xylan during secondary wall biosynthesis.;Encodes a homolog of the protein Cas1p known to be involved in polysaccharide O-acetylatio…
Wa8730a003g000810	1.73121	2.4444e-08	0.000340799	0.375	0.1	AT1G19300;AT3G28340;AT3G50760;AT4G02130	ATGATL1, GATL1, GLZ1, PARVUS;GATL10, GolS8;GATL2;GATL6, LGT10	The PARVUS/GLZ1 gene encodes a putative family 8 glycosyl transferase that contributes to xylan biosynthesis. Its gene expression shows good co-variance with the IRX3 gene involved in secondary cell wall synthesis. PARVUS/GLZ1 is predicted to have galacturonosyltransferase activity and may be involved in the formation of the complex oligosaccharide sequence present at the reducing end of xylan. P…
Wa8730a011g003410	1.93754	5.30133e-19	7.39111e-15	0.562	0.101	AT1G30360	ERD4	Early-responsive to dehydration stress protein (ERD4)
Wa8730a005g003570	1.01785	6.89298e-09	9.61019e-05	0.406	0.101	AT3G24570;AT5G19750	;	Peroxisomal membrane 22 kDa (Mpv17/PMP22) family protein;Peroxisomal membrane 22 kDa (Mpv17/PMP22) family protein
Wa8730a015g000970	2.6247	9.59045e-07	0.013371	0.344	0.102
Wa8730a008g005550	1.29064	3.53015e-14	4.92173e-10	0.5	0.104	AT5G54800;AT1G61800	ATGPT1, GPT1;ATGPT2, GPT2	Encodes glucose6-Phosphate/phosphate transporter 1. Essential for pollen maturation and embryo sac development.;glucose6-Phosphate/phosphate transporter 2
Wa8730a011g005360	1.55657	3.07494e-18	4.28708e-14	0.562	0.107	AT3G21220;AT1G80870	ATMAP2K_ALPHA, ATMEK5, ATMKK5, MAP2K_A, MEK5, MKK5;	Encodes a mitogen-activated kinase kinase, dual specific protein kinase that is expressed in vegetative tissues and floral buds. Involved in innate immunity. This protein activates MPK3/MPK6 and early-defense genes redundantly with MKK4.In plants with both MKK5 and MKK6 levels reduced by RNAi plants, floral organs do not abscise suggestion a role for both proteins in mediating floral organ abscis…
Wa8730a015g005290	2.03346	3.07316e-23	4.2846e-19	0.625	0.108	AT3G01490		Protein kinase superfamily protein
Wa8730a003g004140	1.59304	4.31079e-21	6.0101e-17	0.625	0.111
Wa8730a010g002460	1.52311	5.57762e-15	7.77632e-11	0.531	0.113	AT2G30980;AT4G00720;AT3G05840;AT5G14640;AT4G18710;AT1G57870;AT3G61160	ASKdZeta, ATSK2-2, ATSK23, BIL1, SKdZeta;ASKTHETA, ATSK32, SK32;ATSK12;ATSK13, SK13;ATSK21, BIN2, DWF12, SK21, UCU1;ATSK42, SK42;	Encodes a GSK3-like protein kinase. This protein can interact with the BZR1 protein involved in brassinosteroid-mediated signaling in a Y2H assay and promotes BZR1 phosphorylation in protoplasts.;Encodes ASKtheta, a group III Arabidopsis GSK3/shaggy-like kinase. Functions in the brassinosteroid signalling pathway.;encodes a SHAGGY-like kinase involved in meristem organization.;shaggy-like kinase …
Wa8730a008g005080	1.12536	1.76677e-10	2.46323e-06	0.469	0.113	AT4G21215
Wa8730a004g005340	1.59933	3.10558e-15	4.32979e-11	0.562	0.116	AT4G39210;AT2G21590	APL3;APL4	Encodes the large subunit of ADP-Glucose Pyrophosphorylase which catalyzes the first, rate limiting step in starch biosynthesis. The large subunit plays a regulatory role whereas the small subunit (ApS) is the catalytic isoform. Four isoforms (ApL1-4) have been identified. ApL3 is the major large subunit isoform present in inflorescences, fruits and roots.;Encodes the large subunit of ADP-glucose…
Wa8730a011g002560	1.35839	9.8397e-08	0.00137185	0.406	0.116
Wa8730a016g003650	1.11527	6.65457e-09	9.2778e-05	0.438	0.117	AT3G17810	PYD1	Encodes a protein predicted to have dihydropyrimidine dehydrogenase activity. Its activity has not been demonstrated in vivo, but, it is required for efficient uracil catabolism in Arabidopsis. It localizes to the plastid.
Wa8730a002g000150	1.07189	6.79547e-13	9.47425e-09	0.531	0.118	AT5G54310	AGD5, AtAGD5, NEV	A member of ARF GAP domain (AGD), A thaliana has 15 members, grouped into four classes. Regulates membrane trafficking and organ separation.
Wa8730a005g004450	1.7105	5.30612e-07	0.0073978	0.375	0.118	AT5G42980;AT1G53300;AT3G14950;AT2G42580;AT3G58620	ATH3, ATTRX3, ATTRXH3, TRX3, TRXH3;TTL1;TTL2;TTL3, VIT;TTL4	encodes a cytosolic thioredoxin that reduces disulfide bridges of target proteins by the reversible formation of a disulfide bridge between two neighboring Cys residues present in the active site. Thioredoxins have been found to regulate a variety of biological reactions in prokaryotic and eukaryotic cells.;Encodes one of the 36 carboxylate clamp (CC)-tetratricopeptide repeat (TPR) proteins (Pras…
Wa8730a012g004500	1.01263	2.23728e-10	3.11922e-06	0.469	0.12	AT4G24590
Wa8730a006g002270	1.10147	9.82332e-10	1.36957e-05	0.469	0.122	AT5G14500;AT3G01590	;	aldose 1-epimerase family protein;Galactose mutarotase-like superfamily protein
Wa8730a019g000660	1.89757	5.54509e-07	0.00773096	0.406	0.124	AT5G59820;AT2G37430;AT2G28710;AT1G02030;AT5G03510;AT3G46070;AT3G53600	AtZAT12, RHL41, ZAT12;ZAT11;;;;;	Encodes a zinc finger protein involved in high light and cold acclimation. Overexpression of this putative transcription factor increases the expression level of 9 cold-responsive genes and represses the expression level of 15 cold-responsive genes, including CBF genes. Also, lines overexpressing this gene exhibits a small but reproducible increase in freeze tolerance. Because of the repression o…
Wa8730a002g005560	1.92892	6.25749e-13	8.72419e-09	0.531	0.125	AT1G42470;AT4G38350	;	Patched family protein;Patched family protein
Wa8730a002g004510	1.06981	3.45252e-12	4.8135e-08	0.531	0.127	AT4G38600;AT5G02880	KAK, UPL3;UPL4	encodes a member of HECT ubiquitin protein ligase family that is involved in trichome cell morphogenesis. Mutants in this gene exhibit supernumerary trichome branches and increased DNA content.;encodes a ubiquitin-protein ligase containing a HECT domain. There are six other HECT-domain UPLs in Arabidopsis.
Wa8730a010g004440	2.82111	8.74967e-14	1.21988e-09	0.531	0.128
Wa8730a001g010390	2.25465	1.33226e-08	0.000185744	0.438	0.129
Wa8730a006g003950	2.04962	1.71672e-26	2.39345e-22	0.719	0.13	AT2G47060;AT2G41970;AT3G59350;AT2G43230	PTI1-4;;;	Encodes Pto-interacting 1-4 (PTI1-4), a member of the PTI1-like serine/threonine protein kinases that share strong sequence identity to the tomato PTI1 kinase.;Encodes MRI, a plasma membrane-localized member of the RLCK-VIII subfamily. Preferentially expressed in both pollen tubes and root hairs. mri-knockout mutants display spontaneous pollen tube and root-hair bursting.;Protein kinase superfami…
Wa8730a002g007690	1.28212	3.72008e-08	0.000518654	0.438	0.13	AT2G45830;AT1G63420;AT5G23850;AT3G61270;AT3G48980	DTA2;;;;	downstream target of AGL15 2;Arabidopsis thaliana protein of unknown function (DUF821);Arabidopsis thaliana protein of unknown function (DUF821);Arabidopsis thaliana protein of unknown function (DUF821);Arabidopsis thaliana protein of unknown function (DUF821)
Wa8730a002g000180	1.31647	2.56501e-10	3.57614e-06	0.5	0.131	AT4G27360		Dynein light chain type 1 family protein
Wa8730a007g002350	1.32808	2.61812e-09	3.65018e-05	0.469	0.131
Wa8730a003g006240	1.03675	6.1516e-08	0.000857656	0.438	0.132	AT1G22450;AT5G57815	ATCOX6B2, COX6B;	subunit 6b of cytochrome c oxidase;Cytochrome c oxidase, subunit Vib family protein
Wa8730a007g001880	1.02908	1.90537e-08	0.000265646	0.469	0.133	AT1G48090		calcium-dependent lipid-binding family protein
Wa8730a012g004710	1.2819	4.77655e-10	6.65946e-06	0.5	0.137	AT4G09020	ATISA3, ISA3	Encodes an isoamylase-like protein. Mutant studies show that the gene is strongly involved in starch breakdown. A GUS-protein fusion product was shown to localize to the surface of chloroplastic structures reminiscent of starch granules. In the mutants, the chloroplastic &#945;-amylase AMY3 is upregulated.
Wa8730a019g000830	1.11476	3.95073e-10	5.5081e-06	0.5	0.138	AT3G55000	TON1, TON1A	Encodes a protein of unknown function that is involved in cortical microtubule organization. Mutants exhibit abnormal cell growth and patterns of division. TON1A can functionally complement TON1B and their roles appear to be redundant in plants. Encodes a novel protein that is similar to human FOP and OFD1 centrosomal proteins. Localizes to the preprophase band, cytoplasm and cell cortex where it…
Wa8730a005g008700	1.40754	1.43533e-08	0.000200113	0.469	0.138	AT3G17980;AT1G66360;AT2G01540;AT1G70790;AT1G48590;AT5G37740	AtC2, AtGAP1, C2;;;;;	Calcium-dependent lipid-binding (CaLB domain) family protein;Calcium-dependent lipid-binding (CaLB domain) family protein;Calcium-dependent lipid-binding (CaLB domain) family protein;Calcium-dependent lipid-binding (CaLB domain) family protein;Calcium-dependent lipid-binding (CaLB domain) family protein;Calcium-dependent lipid-binding (CaLB domain) family protein
Wa8730a010g002020	1.74377	5.25512e-07	0.00732669	0.406	0.138	AT3G06690		acyl-CoA oxidases;oxidoreductases, acting on the CH-CH group of donors;FAD binding;oxidoreductases;acyl-CoA oxidases
Wa8730a007g002650	1.15364	7.41741e-14	1.03414e-09	0.594	0.14
Wa8730a007g006040	1.60233	4.04514e-10	5.63973e-06	0.5	0.141	AT1G77120;AT1G22430;AT5G42250	ADH, ADH1, ATADH, ATADH1;;	Catalyzes the reduction of acetaldehyde using NADH as reductant. Requires zinc for activity. Dimer. Anaerobic response polypeptide (ANP). Fermentation. The protein undergoes thiolation following treatment with the oxidant tert-butylhydroperoxide.;GroES-like zinc-binding dehydrogenase family protein;Zinc-binding alcohol dehydrogenase family protein
Wa8730a003g006280	1.04241	2.43344e-06	0.033927	0.438	0.141	AT1G78240;AT1G13860;AT2G03480;AT3G23300;AT4G14360	OSU1, QUA2, TSD2;QUL1;QUL2;;	Encodes TSD2 (TUMOROUS SHOOT DEVELOPMENT2), a putative methyltransferase with an essential role in cell adhesion and coordinated plant development.;Encodes QUASIMODO2 LIKE1 (QUL1), a paralog of QUASIMODO2 (QUA2). AT1G78240 (QUA2), AT1G13860 (QUL1) and AT2G03480 (QUL2) form a clade with a possible role in plant vasculature development.;Encodes QUASIMODO2 LIKE2 (QUL2), a paralog of QUASIMODO2 (QUA2…
Wa8730a005g003690	1.2785	3.57615e-13	4.98586e-09	0.562	0.143	AT2G46150		Late embryogenesis abundant (LEA) hydroxyproline-rich glycoprotein family
Wa8730a009g001030	1.1003	1.62299e-06	0.0226277	0.438	0.143	AT2G40180;AT5G59220;AT2G30020;AT1G07160	ATHPP2C5, PP2C5;HAI1, SAG113;;	Encodes PP2C5, a member of the PP2C family phosphatases. PP2C5 acts as a MAPK phosphatase that positively regulates seed germination, stomatal closure and ABA-inducible gene expression.;Encodes a member of the PP2C family (Clade A protein phosphatases type 2C). Functions as a negative regulator of osmotic stress and ABA signaling.;Encodes AP2C1. Belongs to the clade B of the PP2C-superfamily. Act…
Wa8730a019g001480	1.07713	9.62865e-11	1.34243e-06	0.531	0.144	AT3G52850;AT2G30290	ATELP, ATELP1, ATVSR1, BP-80, BP80, BP80-1;1, BP80B, GFS1, VSR1, VSR1;1;AtVSR2, BP80-1;2, VSR1;2, VSR2	Encodes the Vacuolar Sorting Receptor-1 (VSR-1)/Epidermal Growth Factor Receptor-like protein1(VSR-1/ATELP1). Binds vacuolar targeting signals. Involved in sorting seed storage proteins into vacuoles.;VACUOLAR SORTING RECEPTOR 2
Wa8730a015g000740	1.74808	1.2367e-11	1.72421e-07	0.562	0.146	AT4G31550;AT2G24570	ATWRKY11, WRKY11;ATWRKY17, WRKY17	member of WRKY Transcription Factor; Group II-d; negative regulator of basal resistance to Pseudomonas syringae.;member of WRKY Transcription Factor; Group II-d; negative regulator of basal resistance to Pseudomonas syringae.
Wa8730a009g006210	1.20942	1.24917e-10	1.74159e-06	0.562	0.155	AT1G27770;AT3G57330;AT4G37640;AT2G22950	ACA1, PEA1;ACA11;ACA2;ACA7	Encodes a chloroplast envelope Ca2+-ATPase with an N-terminal autoinhibitor.;Lesion mimic phenotype when mutation in the gene is combined with a mutation in ACA4. Lesion mimic phenotype of double knockout can be suppressed by nutritional supplements that increase anion levels (e.g. 15 mM Nitrate, Chloride, or Phosphate);Encodes a calmodulin-regulated Ca(2+)-pump located in the endoplasmic reticul…
Wa8730a005g007030	1.43278	1.21832e-13	1.69858e-09	0.625	0.161	AT1G24190;AT1G70060;AT1G10450	ATSIN3, SIN3, SNL3;SNL4;SNL6	Enhances AtERF7-mediated transcriptional repression. RNAi lines show ABA hypersensitivity. Interacts with ERF7 and HDA19.;Encodes a homolog of the transcriptional repressor SIN3 (AT1G24190).;Encodes SIN3-like 6, a homolog of the transcriptional repressor SIN3 (AT1G24190).
Wa8730a010g006350	1.13479	5.09504e-08	0.00071035	0.5	0.164	AT5G57610		Protein kinase superfamily protein with octicosapeptide/Phox/Bem1p domain
Wa8730a010g004450	3.40787	1.38902e-12	1.93657e-08	0.562	0.165
Wa8730a009g002950	3.91729	2.34488e-07	0.00326923	0.469	0.165	AT2G38870		Predicted to encode a PR (pathogenesis-related) peptide that belongs to the PR-6 proteinase inhibitor family. Six putative PR-6-type protein encoding genes are found in Arabidopsis: At2g38900, At2g38870, At5g43570, At5g43580, At3g50020 and At3g46860.
Wa8730a001g004140	2.27046	2.26304e-06	0.0315512	0.438	0.167	AT4G02100;AT2G47440;AT1G02650;AT3G62570	;;;	Heat shock protein DnaJ with tetratricopeptide repeat;Tetratricopeptide repeat (TPR)-like superfamily protein;Tetratricopeptide repeat (TPR)-like superfamily protein;Tetratricopeptide repeat (TPR)-like superfamily protein
Wa8730a019g003580	1.00152	2.10168e-07	0.00293017	0.5	0.17	AT3G17120
Wa8730a015g001600	3.12978	1.00328e-11	1.39877e-07	0.562	0.174	AT4G30280;AT5G48070;AT2G18800;AT4G25810;AT5G57550	ATXTH18, XTH18;ATXTH20, XTH20;ATXTH21, XTH21;XTH23, XTR6;XTH25, XTR3	Encodes a xyloglucan endotransglucosylase/hydrolase with only only the endotransglucosylase (XET; EC 2.4.1.207) activity towards xyloglucan and non-detectable endohydrolytic (XEH; EC 3.2.1.151) activity. Expressed in the mature or basal regions of both the main and lateral roots, but not in the tip of these roots where cell division occurs.;putative xyloglucan endotransglycosylase/hydrolase, expr…
Wa8730a001g006140	1.08225	6.0845e-09	8.48301e-05	0.562	0.176	AT5G01760;AT2G38410;AT3G08790	;;	ENTH/VHS/GAT family protein;ENTH/VHS/GAT family protein;ENTH/VHS/GAT family protein
Wa8730a009g004180	1.0133	4.63524e-08	0.000646246	0.531	0.176	AT5G28050	GSDA	Cytidine/deoxycytidylate deaminase family protein
Wa8730a006g005670	2.19217	5.85526e-16	8.1634e-12	0.656	0.177	AT1G70410;AT4G33580;AT5G14740	ATBCA4, BCA4, CA4;ATBCA5, BCA5;BETA, CA18, CA2	Encodes a putative beta-carbonic anhydrase betaCA4. Together with betaCA1 (At3g01500) regulates CO2-controlled stomatal movements in guard cells.;beta carbonic anhydrase 5;Encodes a beta carbonic anhydrase likely to be localized in the cytoplasm. Expression of its mRNA is seen in etiolated seedlings and points to a possible nonphotosynthetic role for this isoform.
Wa8730a003g008710	1.59697	2.56851e-13	3.58102e-09	0.625	0.177
Wa8730a017g001840	1.53826	6.03512e-12	8.41416e-08	0.625	0.178	AT5G51460;AT4G12430;AT4G22590	ATTPPA, TPPA;TPPF;TPPG	homologous to the C-terminal part of microbial trehalose-6-phosphate phosphatases;Haloacid dehalogenase-like hydrolase (HAD) superfamily protein;Haloacid dehalogenase-like hydrolase (HAD) superfamily protein
Wa8730a015g003280	1.06383	3.38956e-07	0.00472572	0.5	0.178
Wa8730a003g006100	5.47988	1.24541e-46	1.73636e-42	1	0.181	AT1G68300		Adenine nucleotide alpha hydrolases-like superfamily protein
Wa8730a002g002520	1.15596	7.18367e-08	0.00100155	0.531	0.181
Wa8730a011g000330	1.03494	3.70459e-07	0.00516494	0.5	0.184
Wa8730a009g002200	1.14152	2.10392e-08	0.000293329	0.562	0.186	AT3G05020;AT5G27200	ACP, ACP1;ACP5	encodes an acyl carrier protein expressed in leaves, roots, and dry seeds. Protein is not regulated by light.;encodes an acyl carrier protein
Wa8730a014g006110	1.44251	6.49529e-08	0.000905573	0.531	0.187	AT1G14370;AT4G35600;AT2G17220;AT3G55450;AT1G76360;AT1G18160;AT5G03320	APK2A, Kin1, PBL2;CST, CX32, Kin4;Kin3;PBL1;;;	Encodes protein kinase APK2a.;plant-type connexin (gap junction-type protein), a component of plasmodesmata;Encodes a putative serine/threonine-specific protein kinase kin3. Protein is N-myristoylated.;PBS1-like 1;Protein kinase superfamily protein;Protein kinase superfamily protein;Protein kinase superfamily protein
Wa8730a002g002690	1.08024	2.42591e-09	3.3822e-05	0.594	0.195	AT5G51570		SPFH/Band 7/PHB domain-containing membrane-associated protein family
Wa8730a019g002290	2.10443	1.2192e-18	1.69981e-14	0.75	0.196	AT5G27150;AT3G05030	AT-NHX1, ATNHX, ATNHX1, NHX1;ATNHX2, NHX2	Encodes a vacuolar sodium/proton antiporter involved in salt tolerance, ion homeostasis, and leaf development.;member of Sodium proton exchanger family
Wa8730a001g001130	2.18284	6.39092e-08	0.000891022	0.531	0.2	AT3G57270;AT4G31140	BG1;	encodes a member of glycosyl hydrolase family 17;O-Glycosyl hydrolases family 17 protein
Wa8730a019g002340	3.12806	2.18803e-07	0.00305055	0.5	0.2	AT4G15610;AT3G06390	;	Uncharacterised protein family (UPF0497);Uncharacterised protein family (UPF0497)
Wa8730a010g004760	1.74077	1.62157e-12	2.26079e-08	0.656	0.21
Wa8730a012g003470	2.47798	1.32546e-08	0.000184795	0.562	0.212	AT1G53830;AT3G14310;AT4G33220;AT5G49180;AT5G20860;AT3G43270	ATPME2, PME2;ATPME3, OZS2, PME3;ATPME44, PME44;;;	encodes a pectin methylesterase;encodes a pectin methylesterase, targeted by a cellulose binding protein (CBP) from the parasitic nematode Heterodera schachtii during parasitism.;pectin methylesterase 44;Encodes a putative pectin methylesterase. The gene is preferentially expressed in floral buds.;Plant invertase/pectin methylesterase inhibitor superfamily;Plant invertase/pectin methylesterase in…
Wa8730a002g000860	1.59396	1.14545e-08	0.000159698	0.594	0.219
Wa8730a005g003750	2.85587	1.80318e-06	0.02514	0.5	0.221	AT3G25780	AOC3	Encodes allene oxide cyclase, one of the enzymes involved in jasmonic acid biosynthesis. One of four genes in Arabidopsis that encode this enzyme. mRNA expression is upregulated in senescing leaves. Note: Nomenclature for Arabidopsis allene oxide cyclase 3 (AOC3, AT3G25780) gene is based on Stenzel et al. 2003 Plant Molecular Biology 51:895-911. AOC3 (AT3G25780) is also referred to as AOC2 in He …
Wa8730a012g001530	1.3448	2.13131e-14	2.97148e-10	0.75	0.228	AT5G40890;AT3G27170;AT5G49890	ATCLC-A, ATCLCA, CLC-A, CLCA;ATCLC-B, CLC-B;ATCLC-C, CLC-C	Encodes a member of the voltage-dependent chloride channel. Also functions as a NO3-/H+ exchanger that serves to accumulate nitrate nutrient in vacuoles. Mutants homozygous for the T-DNA insertion mutation have reduced nitrate uptake capacity in high nitrate environment and exhibit hypersensitivity to chlorate.;member of Anion channel protein family;member of Anion channel protein family
Wa8730a004g007740	3.304	3.30749e-15	4.61131e-11	0.719	0.231	AT1G03870	FLA9	fasciclin-like arabinogalactan-protein 9 (Fla9)
Wa8730a020g001990	1.73309	4.61391e-19	6.43271e-15	0.812	0.232	AT2G43130;AT1G05810;AT2G33870;AT1G09630;AT1G16920;AT4G18430;AT1G28550;AT5G65270;AT5G47520;AT3G07410;AT2G31680;AT1G18200	ARA-4, ARA4, ATRAB11F, ATRABA5C, RABA5C;ARA, ARA-1, ATRAB11D, ATRABA5E, RABA5E;ArRABA1h;ATRAB-A2A, ATRAB11C, ATRABA2A, RAB-A2A, RAB11c;ATRABA1B, BEX5, RAB11, RABA1b;AtRABA1e, RABA1e;AtRABA1i, RABA1i;AtRABA4a, RABA4a;AtRABA5a, RABA5a;AtRABA5b, RABA5b;AtRABA5d, RABA5d;AtRABA6b, RABA6b	encodes a protein belonging to the Rab/Ypt family of small GTPases, which are implicated in intracellular vesicular traffic.;RAB GTPase homolog A5E;RAB GTPase homolog A1H;Encodes a putative GTP-binding protein. Associates with organelles on a pathway from the Golgi to the plasma membrane in interphase. In dividing cells acts at the cell plate.;small GTP-binding protein (Rab11)similar to YPT3/RAB1…
Wa8730a004g002290	1.20413	5.09237e-09	7.09978e-05	0.625	0.235	AT2G19900;AT5G11670;AT5G25880;AT1G79750	ATNADP-ME1, NADP-ME1;ATNADP-ME2, NADP-ME2;ATNADP-ME3, NADP-ME3;ATNADP-ME4, NADP-ME4	The malic enzyme (EC 1.1.1.40) encoded by AtNADP-ME1 is expressed in response to developmental and cell-specific signals. The enzyme is active in vitro and appears to function as a homohexamer or homooctamer. It is believed to be a cytosolic protein.;The malic enzyme (EC 1.1.1.40) encoded by AtNADP-ME2 is presumably a cytosolic enzyme involved in malate metabolism and possibly assisting the oxida…
Wa8730a003g008790	1.14032	5.16183e-08	0.000719663	0.625	0.235	AT5G06440;AT3G11720	;	;Polyketide cyclase/dehydrase and lipid transport superfamily protein
Wa8730a011g001940	1.60519	2.56042e-08	0.000356974	0.625	0.239	AT2G38740		Haloacid dehalogenase-like hydrolase (HAD) superfamily protein
Wa8730a003g001560	1.60687	1.89112e-14	2.6366e-10	0.75	0.243	AT5G66760;AT2G18450	SDH1-1;SDH1-2	One of two genes in Arabidopsis that encode a flavoprotein subunit of the mitochondrial succinate dehydrogenase complex.;Nuclear encoded mitochondrial flavoprotein subunit of succinate dehydrogenase complex .
Wa8730a004g002960	2.19838	3.58206e-06	0.0499411	0.531	0.245	AT4G29780;AT5G12010	;	;
Wa8730a006g005160	1.15947	3.72422e-08	0.000519231	0.625	0.248	AT5G07350	AtTudor1, TSN1, Tudor1	RNA binding protein with nuclease activity essential for stress response. Involved in mechanisms acting on mRNAs entering the secretory pathway. Functionally redundant with TSN2.
Wa8730a001g004550	1.04545	6.49612e-08	0.000905689	0.625	0.248	AT5G56040;AT2G27060;AT5G21090	SKM2;;	Leucine-rich receptor-like protein kinase family protein;Leucine-rich repeat protein kinase family protein;Leucine-rich repeat (LRR) family protein
Wa8730a019g003660	1.58137	1.56138e-09	2.17687e-05	0.688	0.249	AT3G08720;AT3G17510;AT1G48260	ATPK19, ATPK2, ATS6K2, S6K2;CIPK1, SnRK3.16;CIPK17, SnRK3.21	Encodes a ribosomal-protein S6 kinase. Gene expression is induced by cold and salt (NaCl). Activation of AtS6k is regulated by 1-naphthylacetic acid and kinetin, at least in part, via a lipid kinase-dependent pathway. Phosphorylates specifically mammalian and plant S6 at 25 degrees C but not at 37 degrees C. Involved in translational up-regulation of ribosomal proteins.;Encodes a CBL-interacting …
Wa8730a006g005680	1.11829	7.68596e-08	0.00107158	0.625	0.25	AT1G22280;AT1G78200;AT1G34750	PAPP2C;;	Encodes a phytochrome-associated protein, PAPP2C (phytochrome-associated protein phosphatase type 2C). PAPP2C interacts in the nucleus with phyA (phytochrome A) and phyB. Functions as a regulator of phytochrome-interacting factor PIF3 by dephosphorylating phytochromes in the nucleus.;Protein phosphatase 2C family protein;Protein phosphatase 2C family protein
Wa8730a009g004980	1.0708	1.37358e-07	0.00191505	0.625	0.254	AT3G22845		emp24/gp25L/p24 family/GOLD family protein
Wa8730a009g005860	1.38155	4.22949e-08	0.000589676	0.625	0.258
Wa8730a004g002450	1.20036	3.38722e-10	4.72246e-06	0.719	0.262	AT3G13550;AT5G25760	CIN4, COP10, EMB144, FUS9;PEX4, UBC21	Encodes a protein similar to ubiquitin-conjugating enzyme (E2) variant proteins (UEV); lacks catalytic cysteine residue found in ubiquitin-conjugating enzyme E2. Represses photomorphogenesis and induces skotomorphogenesis in the dark.;mutant displays sucrose-dependent seedling development and reduced lateral root production. PEX4 interacts with PEX22 in a yeast two-hybrid. Necessary for peroxisom…
Wa8730a001g004180	1.78993	2.73836e-13	3.81783e-09	0.75	0.267	AT5G54430;AT3G62550;AT2G47710	ATPHOS32, PHOS32;;	Contains a universal stress protein domain. Protein is phosphorylated in response to Phytophthora infestans zoospores and xylanase.;Adenine nucleotide alpha hydrolases-like superfamily protein;Adenine nucleotide alpha hydrolases-like superfamily protein
Wa8730a012g004140	3.11064	8.55099e-20	1.19218e-15	0.844	0.27	AT5G37600;AT3G17820;AT1G66200;AT1G48470	ATGLN1;1, ATGSR1, GLN1;1, GSR;ATGSKB6, GLN1.3, GLN1;3;ATGSR2, GLN1;2, GSR2;GLN1;5	encodes a cytosolic glutamine synthetase, the enzyme has high affinity with substrate ammonium;encodes a cytosolic glutamine synthetase, the enzyme has low affinity with substrate ammonium;encodes a cytosolic glutamate synthetase, this enzyme has low affinity with substrate ammonium;Encodes cytosolic glutamine synthase isozyme. Expression of mRNA is not detectable in roots.
Wa8730a002g001850	1.33906	4.61863e-11	6.43929e-07	0.75	0.281	AT2G21410;AT4G39080	VHA-A2;VHA-A3	Vacuolar proton ATPase subunit VHA-a isoform 2. Localized in the tonoplast. Required for efficient nutrient storage but not for sodium accumulation.;Vacuolar proton ATPase subunit VHA-a isoform 3. Localized in the tonoplast.
Wa8730a005g007530	1.32311	3.65066e-08	0.000508975	0.656	0.287
Wa8730a014g001270	1.63686	1.52517e-10	2.12639e-06	0.75	0.316	AT1G27350		Ribosome associated membrane protein RAMP4
Wa8730a015g005600	1.33382	3.32453e-11	4.63506e-07	0.781	0.317
Wa8730a015g001580	3.14873	1.18126e-10	1.64692e-06	0.688	0.322	AT4G30280;AT5G48070;AT2G18800;AT4G25810;AT5G57550	ATXTH18, XTH18;ATXTH20, XTH20;ATXTH21, XTH21;XTH23, XTR6;XTH25, XTR3	Encodes a xyloglucan endotransglucosylase/hydrolase with only only the endotransglucosylase (XET; EC 2.4.1.207) activity towards xyloglucan and non-detectable endohydrolytic (XEH; EC 3.2.1.151) activity. Expressed in the mature or basal regions of both the main and lateral roots, but not in the tip of these roots where cell division occurs.;putative xyloglucan endotransglycosylase/hydrolase, expr…
Wa8730a017g001820	1.40829	1.94417e-06	0.0271056	0.656	0.332	AT5G62390	ATBAG7, BAG7	A member of Arabidopsis BAG (Bcl-2-associated athanogene) proteins, plant homologs of mammalian regulators of apoptosis. Plant BAG proteins are multi-functional and remarkably similar to their animal counterparts, as they regulate apoptotic-like processes ranging from pathogen attack, to abiotic stress, to plant development. Localized to the ER. Necessary for the proper maintenance of the unfolde…
Wa8730a007g002590	1.41649	5.53408e-09	7.71561e-05	0.75	0.336	AT3G25160		ER lumen protein retaining receptor family protein
Wa8730a001g002830	1.8066	3.54591e-08	0.000494371	0.719	0.353	AT1G09070;AT1G12810	(ATSRC2, AtSRC2, SRC2;	SRC2 specifically binds the peptide PIEPPPHH, and moves from ER to a vacuole fraction where it gets internalized. Involved in Protein Storage Vacuole targeting.;proline-rich family protein
Wa8730a012g005080	1.27662	6.16538e-07	0.00859577	0.719	0.354	AT5G09930;AT5G64840;AT4G33460;AT2G22120	ABCF2;ABCF5, ATGCN5, GCN5;ABCI10, ATNAP13, EMB2751;	member of GCN subfamily;member of GCN subfamily;member of NAP subfamily;RING/FYVE/PHD zinc finger superfamily protein
Wa8730a011g003440	1.33295	5.42626e-10	7.5653e-06	0.812	0.37	AT1G30270	ATCIPK23, CIPK23, LKS1, PKS17, SnRK3.23	Arabidopsis thaliana CBL-interacting protein kinase 23. CIPK23 serves as a positive regulator of the potassium transporter AKT1 by directly phosphorylating AKT1. CIPK23 is activated by the binding of two calcineurin B-like proteins, CBL1 and CBL9.
Wa8730a003g003230	1.34999	2.52878e-06	0.0352562	0.688	0.373	AT2G03680;AT1G26355;AT1G69230;AT5G15600	SKU6, SPR1;SP1L1;SP1L2;SP1L4	The SPR1 gene encodes a plant-specific 12-kD protein which has a repeated motif at both ends, separated by a predicted rod-like domain, suggesting that it may act as an intermolecular linker. Ubiquitously expressed and belongs to a six-member gene family in Arabidopsis; expressed in transgenic seedlings localized to microtubules within the cortical array, preprophase band, phragmoplast, and mitot…
Wa8730a015g004640	3.25053	7.35655e-07	0.0102565	0.625	0.378	AT3G48180;AT1G24405	;	;
Wa8730a002g009090	1.07658	7.43042e-08	0.00103595	0.812	0.385	AT1G04710;AT2G33150;AT5G48880	KAT1, PKT4;KAT2, PED1, PKT3;KAT5, PKT1, PKT2	EC2.3.1.16 thiolase.;Encodes an organellar (peroxisome, glyoxysome) 3-ketoacyl-CoA thiolase, involved in fatty acid b-oxidation during germination and subsequent seedling growth. Mutants have defects in glyoxysomal fatty acid beta-oxidation. EC2.3.1.16 thiolase.;Encodes a peroxisomal 3-keto-acyl-CoA thiolase 2 precursor. EC2.3.1.16 thiolases. AT5G48880.1 is named PKT1 and AT5G48880.2 is named PKT…
Wa8730a004g007390	1.14173	4.36594e-07	0.006087	0.719	0.389	AT2G26260;AT1G64090	3BETAHSD/D2, AT3BETAHSD/D2;RTNLB3	Encodes an enzyme with 3&#946;-hydroxysteroid dehydrogenase/C4-decarboxylase activity <i>in vitro</i>. The activity of the enzyme was determined using microsomal extracts of yeast overexpressing the <i>Arabidopsis</i> gene. Cytosolic fractions failed to be associated to the activity, leading to the speculation that the enzyme is membrane-bound.;Reticulan like protein B3
Wa8730a005g005300	1.2541	1.60287e-08	0.000223472	0.812	0.401	AT2G46500;AT5G24240	ATPI4K, PI4K, UBDK;	Phosphoinositide kinase which undergo autophosphorylation and phosphorylate serine/threonine residues of protein substrates. Contains phosphoinositide 3/4-kinase and ubiquitin-like domains. Phosphorylates PUFD1 and RPN10 in vitro.;Encodes PI4Kc3, localizes to the nucleus and has autophosphorylation activity, but no lipid kinase activity. Overexpression mutants display late-flowering phenotype.
Wa8730a004g008180	1.31271	1.02289e-07	0.00142611	0.781	0.412
Wa8730a001g012130	2.68964	1.78099e-06	0.0248305	0.656	0.412	AT3G54040		PAR1 protein
Wa8730a006g004380	1.66742	1.07476e-08	0.000149843	0.875	0.448	AT3G07570		Cytochrome b561/ferric reductase transmembrane with DOMON related domain
Wa8730a005g006600	1.37178	2.92698e-08	0.00040808	0.812	0.457	AT3G03270;AT5G14680;AT3G58450	;;	HRU1 is a hypoxia induced universal stress protein. It exists as two splice variants with AT3G03270.2 , which contains a putative dimerization domain, the predominant transcript found under anoxia. It is induced by RAP2.12. Subcellular localization is dynamic; under anoxia the localization of HRU1 shifts from cytoplasm to the plasma membrane.;Adenine nucleotide alpha hydrolases-like superfamily p…
Wa8730a004g003160	1.35829	3.25717e-08	0.000454114	0.875	0.487
Wa8730a005g005240	2.58278	5.07689e-07	0.0070782	0.688	0.505	AT5G42050		DCD (Development and Cell Death) domain protein
Wa8730a010g001340	1.57373	6.91478e-09	9.64058e-05	0.812	0.509	AT1G65980	TPX1	thioredoxin-dependent peroxidase
Wa8730a014g001330	1.55834	3.70159e-07	0.00516076	0.781	0.512	AT2G03680;AT1G26355;AT1G69230;AT3G02180;AT5G15600	SKU6, SPR1;SP1L1;SP1L2;SP1L3;SP1L4	The SPR1 gene encodes a plant-specific 12-kD protein which has a repeated motif at both ends, separated by a predicted rod-like domain, suggesting that it may act as an intermolecular linker. Ubiquitously expressed and belongs to a six-member gene family in Arabidopsis; expressed in transgenic seedlings localized to microtubules within the cortical array, preprophase band, phragmoplast, and mitot…
Wa8730a006g002040	2.41199	9.95667e-19	1.38816e-14	0.969	0.513	AT3G26650;AT1G13440;AT1G79530;AT1G16300	GAPA, GAPA-1;GAPC-2, GAPC2;GAPCP-1;GAPCP-2	Encodes one of the two subunits forming the photosynthetic glyceraldehyde-3-phosphate dehydrogenase (GAPDH) and as such a constituent of the supramolecular complex with phosphoribulokinase (PRK) thought to be linked by a small peptide encoded by CP12-2. GapA-1 is coordinately expressed by light with PRK and CP12-2. The enzyme activity, tested in leaf protein extracts dropped significantly after e…
Wa8730a003g006110	1.19334	1.7433e-06	0.0243051	0.812	0.514	AT4G40040;AT1G75600;AT1G13370	H3.3;;	Histone superfamily protein;Histone superfamily protein;Histone superfamily protein
Wa8730a015g000610	1.2464	5.98392e-10	8.34279e-06	0.938	0.55	AT2G19180;AT1G16840	;	;
Wa8730a009g002460	1.57406	5.59214e-09	7.79656e-05	0.938	0.615	AT3G05500;AT2G47780	;	Encodes a protein that associates with lipid droplet surfaces and shares sequence homology with family of small rubber particle proteins. The mRNA is cell-to-cell mobile.;Encodes a small rubber particle protein homolog. Plays dual roles as positive factors for tissue growth and development and in drought stress responses.
Wa8730a010g006490	1.92004	5.62459e-08	0.00078418	0.906	0.617	AT4G28050;AT2G23810;AT4G30430	TET7;TET8;TET9	Member of TETRASPANIN family;Member of TETRASPANIN family;Member of TETRASPANIN family
Wa8730a004g004750	1.11416	2.61398e-06	0.0364441	0.875	0.646
Wa8730a019g003170	2.08494	1.27658e-07	0.0017798	0.938	0.679	AT3G10300;AT5G04170	;	Calcium-binding EF-hand family protein;Calcium-binding EF-hand family protein
Wa8730a006g006630	1.52744	1.92999e-11	2.6908e-07	0.969	0.761	AT1G22300;AT5G65430;AT5G10450;AT1G78300;AT1G35160;AT4G09000;AT5G16050;AT3G02520	14-3-3EPSILON, GF14, GRF10;14-3-3KAPPA, GF14, GRF8;14-3-3lambda, AFT1, GRF6;14-3-3OMEGA, GF14, GRF2;14-3-3PHI, GF14, GRF4;GF14, GRF1;GF14, GRF5;GF14, GRF7	Encodes a 14-3-3 protein. This protein is reported to interact with the BZR1 transcription factor involved in brassinosteroid signaling and may affect the nucleocytoplasmic shuttling of BZR1;member of 14-3-3 proteins. This protein is reported to interact with the BZR1 transcription factor involved in brassinosteroid signaling and may affect the nucleocytoplasmic shuttling of BZR1;Encodes a member…
Wa8730a008g002610	1.03316	2.47639e-07	0.00345259	0.938	0.857

## Sheet: Stomatal DEG GO
Dataset S5. Enriched GO terms for Differentially Expressed Genes in Stomata
GO	name	Ratio in Study	Ratio in Pop.	p Value	Depth	Study Count	p Value (BH-FDR)	Study Items
GO:0034641	cellular nitrogen compound metabolic process	9/278	1681/13944	2.15e-07	3	9	0.001486	Wa8730a002g001850, Wa8730a002g004510, Wa8730a003g001560, Wa8730a006g005160, Wa8730a009g004180, Wa8730a011g000330, Wa8730a011g003010, Wa8730a016g003650, Wa8730a019g000880
GO:0090304	nucleic acid metabolic process	4/278	1196/13944	6.39e-07	5	4	0.002209	Wa8730a002g004510, Wa8730a006g005160, Wa8730a009g004180, Wa8730a011g000330
GO:0006139	nucleobase-containing compound metabolic process	8/278	1390/13944	1.01e-05	4	8	0.018251	Wa8730a002g001850, Wa8730a002g004510, Wa8730a003g001560, Wa8730a006g005160, Wa8730a009g004180, Wa8730a011g000330, Wa8730a011g003010, Wa8730a016g003650
GO:0046483	heterocycle metabolic process	10/278	1543/13944	1.06e-05	3	10	0.018251	Wa8730a002g001850, Wa8730a002g004510, Wa8730a003g001560, Wa8730a005g003560, Wa8730a006g005160, Wa8730a009g004180, Wa8730a011g000330, Wa8730a011g003010, Wa8730a016g003650, Wa8730a019g000880
GO:0016070	RNA metabolic process	3/278	923/13944	1.35e-05	6	3	0.018718	Wa8730a006g005160, Wa8730a009g004180, Wa8730a011g000330
GO:0071944	cell periphery	61/278	1421/13944	5.38e-09	2	61	5.78e-06	Wa8730a001g001130, Wa8730a001g004180, Wa8730a001g004550, Wa8730a001g006140, Wa8730a001g009590, Wa8730a001g010560, Wa8730a002g001850, Wa8730a002g002690, Wa8730a002g004510, Wa8730a002g004860, Wa8730a002g005560, Wa8730a002g006920, Wa8730a003g001560, Wa8730a003g006100, Wa8730a003g007260, Wa8730a004g002920, Wa8730a004g002930, Wa8730a004g003160, Wa8730a004g007740, Wa8730a004g008180, Wa8730a004g008470, …
GO:0005886	plasma membrane	47/278	1185/13944	5.58e-06	3	47	0.002994	Wa8730a001g001130, Wa8730a001g004180, Wa8730a001g004550, Wa8730a001g006140, Wa8730a001g010560, Wa8730a002g001850, Wa8730a002g002690, Wa8730a002g004510, Wa8730a002g005560, Wa8730a002g006920, Wa8730a003g006100, Wa8730a004g003160, Wa8730a004g007740, Wa8730a004g008180, Wa8730a004g008470, Wa8730a005g000790, Wa8730a005g003750, Wa8730a005g006600, Wa8730a006g003950, Wa8730a006g005160, Wa8730a006g005680, …
GO:0005618	cell wall	18/278	293/13944	2.44e-05	3	18	0.006842	Wa8730a001g001130, Wa8730a001g009590, Wa8730a002g004860, Wa8730a003g001560, Wa8730a004g002920, Wa8730a004g002930, Wa8730a004g007740, Wa8730a004g008540, Wa8730a005g002610, Wa8730a006g005160, Wa8730a006g006630, Wa8730a009g001170, Wa8730a010g002030, Wa8730a010g002350, Wa8730a011g000160, Wa8730a013g000360, Wa8730a014g003110, Wa8730a016g004810
GO:0030312	external encapsulating structure	18/278	294/13944	2.55e-05	2	18	0.006842	Wa8730a001g001130, Wa8730a001g009590, Wa8730a002g004860, Wa8730a003g001560, Wa8730a004g002920, Wa8730a004g002930, Wa8730a004g007740, Wa8730a004g008540, Wa8730a005g002610, Wa8730a006g005160, Wa8730a006g006630, Wa8730a009g001170, Wa8730a010g002030, Wa8730a010g002350, Wa8730a011g000160, Wa8730a013g000360, Wa8730a014g003110, Wa8730a016g004810
GO:0009505	plant-type cell wall	10/278	130/13944	0.000275	4	10	0.03686	Wa8730a001g009590, Wa8730a004g002920, Wa8730a004g002930, Wa8730a004g007740, Wa8730a004g008540, Wa8730a010g002350, Wa8730a011g000160, Wa8730a013g000360, Wa8730a014g003110, Wa8730a016g004810
GO:0070013	intracellular organelle lumen	0.0143885	0.0626793	0.000146	3	4	0.022401	Wa8730a001g000860, Wa8730a002g009090, Wa8730a005g007530, Wa8730a014g000010
GO:0031974	membrane-enclosed lumen	0.0143885	0.0626793	0.000146	2	4	0.022401	Wa8730a001g000860, Wa8730a002g009090, Wa8730a005g007530, Wa8730a014g000010
GO:0043233	organelle lumen	0.0143885	0.0626793	0.000146	3	4	0.022401	Wa8730a001g000860, Wa8730a002g009090, Wa8730a005g007530, Wa8730a014g000010
GO:0022832	voltage-gated channel activity	0.0179856	0.00129088	2.1e-05	6	5	0.016589	Wa8730a004g008470, Wa8730a012g001530, Wa8730a012g004060, Wa8730a013g005940, Wa8730a017g001630
GO:0005244	voltage-gated ion channel activity	0.0179856	0.00129088	2.1e-05	7	5	0.016589	Wa8730a004g008470, Wa8730a012g001530, Wa8730a012g004060, Wa8730a013g005940, Wa8730a017g001630
GO:0022839	ion gated channel activity	0.0179856	0.00164945	7.62e-05	6	5	0.037862	Wa8730a004g008470, Wa8730a012g001530, Wa8730a012g004060, Wa8730a013g005940, Wa8730a017g001630
GO:0005216	ion channel activity	0.0215827	0.00272519	9.61e-05	5	6	0.037862	Wa8730a004g008470, Wa8730a009g006210, Wa8730a012g001530, Wa8730a012g004060, Wa8730a013g005940, Wa8730a017g001630
GO:0046910	pectinesterase inhibitor activity	0.0179856	0.00179289	0.000116	4	5	0.038455	Wa8730a001g003660, Wa8730a003g007260, Wa8730a007g004070, Wa8730a016g004810, Wa8730a018g002390
GO:0022836	gated channel activity	0.0179856	0.0018646	0.000142	5	5	0.038455	Wa8730a004g008470, Wa8730a012g001530, Wa8730a012g004060, Wa8730a013g005940, Wa8730a017g001630
GO:0004857	enzyme inhibitor activity	0.0251799	0.0041595	0.000146	3	7	0.038455	Wa8730a001g003660, Wa8730a003g007260, Wa8730a007g004070, Wa8730a010g004440, Wa8730a010g004450, Wa8730a016g004810, Wa8730a018g002390
GO:0051540	metal cluster binding	0.0179856	0.00207975	0.000244	2	5	0.048491	Wa8730a001g011340, Wa8730a016g003650, Wa8730a019g002340, Wa8730a019g002350, Wa8730a019g002360
GO:0051536	iron-sulfur cluster binding	0.0179856	0.00207975	0.000244	3	5	0.048491	Wa8730a001g011340, Wa8730a016g003650, Wa8730a019g002340, Wa8730a019g002350, Wa8730a019g002360
GO:0036094	small molecule binding	0.0503597	0.0167097	0.000246	2	14	0.048491	Wa8730a001g004180, Wa8730a002g004710, Wa8730a002g005560, Wa8730a002g006920, Wa8730a003g000940, Wa8730a003g001560, Wa8730a003g006100, Wa8730a005g002240, Wa8730a005g006600, Wa8730a006g006630, Wa8730a010g002020, Wa8730a012g005070, Wa8730a013g000470, Wa8730a015g002650
GO:0003676	nucleic acid binding	0.0215827	0.0874211	8.19e-06	3	6	0.016589	Wa8730a002g001920, Wa8730a003g006110, Wa8730a005g007530, Wa8730a006g005160, Wa8730a015g000740, Wa8730a019g000660
GO:0003723	RNA binding	0.00719424	0.051922	9.26e-05	4	2	0.037862	Wa8730a005g007530, Wa8730a006g005160
