# Supplementary material for: Streamlined spatial and environmental expression signatures characterize the minimalist duckweedWolffia australiana
Source: HighWire-hosted journal article supplement (doi:10.1101/gr.279091.124), 2024-07-01
Supplement: Supplemental_Dataset_S6.xlsx [file Supplemental_Dataset_S6.xlsx]

## Sheet: Daughter vs Mother DEGs
Dataset S6. DEGs for Daughter vs. Mother Fronds - Bulk RNA-Seq
Genes showing significant differential expression (log2FC>1 & p_val_adj <0.05) with a minimum total read count >10 across all samples
Base Mean: the average of the normalized count values, dividing by size factors, taken over all samples in the DESeqDataSet.
Up-regulated in daughter fronds: log2FC>0
Up-regulated in mother fronds: log2FC<0
Gene	Base Mean	Log2 FC	p Value	p Value Adj.	Arabidopsis Orthologues	Arabidopsis Gene name	Arabidopsis Gene description
Wa8730a019g000180	28.3538	3.46835	8.179e-05	0.0122067	AT5G60020 AT2G38080 AT5G05390 AT5G07130 AT2G30210 AT2G40370 AT2G46570 AT3G09220 AT5G01040	ATLAC17, LAC17 ATLMCO4, IRX12, LAC4, LMCO4 LAC12 LAC13 LAC3 LAC5 LAC6 LAC7 LAC8	putative laccase, a member of laccase family of genes (17 members in Arabidopsis). Encodes a protein with similarity to putative laccase, a member of laccase family (17 members in Arabidopsis). Might be involved in cell wall biosynthesis. Mutants have a mild irregular xylem phenotype. putative laccase, a member of laccase family of genes (17 members in Arabidopsis). putative laccase, a member of …
Wa8730a009g003220	31.2111	3.44969	2.1461e-06	0.000581921
Wa8730a015g000710	36.0019	3.11856	2.67638e-06	0.000701048	AT4G25850 AT5G57240	ORP4B ORP4C	OSBP(oxysterol binding protein)-related protein 4B OSBP(oxysterol binding protein)-related protein 4C
Wa8730a009g003150	139.366	3.0236	1.12075e-05	0.0022833
Wa8730a011g000760	84.869	2.9443	7.56934e-06	0.00175116
Wa8730a017g000080	280.499	2.81422	2.16589e-10	2.31661e-07	AT3G06060	TSC10A	Encodes one of the Arabidopsis proteins (At3g06060/TSC10A and At5g19200/TSC10B) with significant similarity to the yeast 3-ketodihydrosphinganine (3-KDS) reductase, Tsc10p. Both TSC10A and TSC10B are bona fide 3-KDS reductase as shown by complementation experiment in yeast.
Wa8730a014g005010	128.94	2.69961	1.16075e-06	0.000338782	AT4G12390 AT1G62770 AT5G62360 AT1G14890 AT2G01610 AT4G25260	PME1	pectin methylesterase inhibitor 1 Plant invertase/pectin methylesterase inhibitor superfamily protein Plant invertase/pectin methylesterase inhibitor superfamily protein Plant invertase/pectin methylesterase inhibitor superfamily protein Plant invertase/pectin methylesterase inhibitor superfamily protein Plant invertase/pectin methylesterase inhibitor superfamily protein
Wa8730a011g000800	248.684	2.64442	5.54468e-07	0.000182477
Wa8730a015g004990	81.1579	2.62718	6.78615e-06	0.0016434
Wa8730a008g005160	98.3741	2.56379	3.83154e-06	0.000964272	AT4G37800 AT1G11545 AT4G03210	XTH7 XTH8 XTH9	xyloglucan endotransglucosylase/hydrolase 7 xyloglucan endotransglucosylase/hydrolase 8 encodes a member of xyloglucan endotransglucosylase/hydrolases (XTHs) that catalyze the cleavage and molecular grafting of xyloglucan chains function in loosening and rearrangement of the cell wall. Gene is expressed in shoot apex region, flower buds, flower stalks and internodes bearing flowers.
Wa8730a005g004980	340.547	2.52403	2.70486e-09	2.04217e-06	AT2G42380 AT3G58120	ATBZIP34, BZIP34 ATBZIP61, BZIP61	Encodes a member of the BZIP family of transcription factors. Forms heterodimers with the related protein AtbZIP61. Binds to G-boxes in vitro and is localized to the nucleus in onion epidermal cells. Encodes a member of the BZIP family of transcription factors. Forms heterodimers with the related protein AtbZIP34. Binds to G-boxes in vitro and is localized to the nucleus in onion epidermal cells.
Wa8730a020g000180	148.781	2.46534	2.82876e-07	0.000106786	AT1G72110 AT5G22490		O-acyltransferase (WSD1-like) family protein O-acyltransferase (WSD1-like) family protein
Wa8730a013g003830	593.556	2.41771	2.17625e-06	0.000581921
Wa8730a007g000880	110.524	2.32151	4.49165e-06	0.00110866	AT3G53190 AT3G01270 AT3G27400 AT4G24780 AT1G67750 AT5G04310 AT5G63180 AT3G24670 AT5G48900 AT4G13710 AT1G04680		Pectin lyase-like superfamily protein Pectate lyase family protein Encodes a pectate lyase involved in response to nematodes. Encodes a pectate lyase involved in response to nematodes. Pectate lyase family protein Pectin lyase-like superfamily protein Pectin lyase-like superfamily protein Pectin lyase-like superfamily protein Pectin lyase-like superfamily protein Pectin lyase-like superfamily pro…
Wa8730a014g004530	379.513	2.19492	9.71398e-05	0.0140089	AT5G04230	ATPAL3, PAL3	Member of Phenylalanine ammonialyase (PAL) gene family. Differs significantly from PAL1 and PAL2 and other sequenced plant PAL genes. Arabidopsis has four PALs: AT2G37040 (PAL1), AT3G53260 (PAL2), AT5G04230 (PAL3) and AT3G10340 (PAL4).
Wa8730a009g006940	829.281	2.16868	8.3814e-07	0.000256132	AT4G36850		PQ-loop repeat family protein / transmembrane family protein
Wa8730a013g003820	353.345	2.13662	0.000440012	0.04954
Wa8730a020g002170	144.648	2.04504	0.000181601	0.0237842
Wa8730a005g002110	188.401	2.0247	0.000103875	0.0148138
Wa8730a007g007810	323.42	2.01971	0.00012456	0.0171906	AT1G01900 AT1G20160 AT5G03620	ATSBT1.1, SBTI1.1 ATSBT5.2	Encodes AtSBT1.1, a subtilisin-like serine protease. Cleaves the phytosulfokine AtPSK4, a growth promoting peptide. SBT5.2(b) is localized to endosomes.It interacts with and tethers MYB30 in to the endosomes resulting in an attenuated defense response.This isoform lacks serine protease activity.N-terminal myristoylation in SBT5.2(b) determines its localization to endosomes and MYB30 nuclear exclu…
Wa8730a009g003160	407.803	1.99204	0.00024412	0.0313329
Wa8730a001g012630	688.371	1.97226	4.07444e-08	1.86769e-05	AT5G05690	CBB3, CPD, CYP90, CYP90A, CYP90A1, DWF3	Encodes a member of the CP90A family, a cytochrome P450 monooxygenase which converts 6-deoxocathasterone to 6-deoxoteasterone in the late C6 oxidation pathway and cathasterone to teasterone in the early C6 oxidation pathway of brassinolide biosynthesis. Expressed in cotyledons and leaves. Mutants display de-etiolation and derepression of light-induced genes in the dark, dwarfism, male sterility a…
Wa8730a010g002220	1230.59	1.97042	1.10459e-08	6.44429e-06	AT5G53880
Wa8730a001g007340	511.752	1.92723	1.16139e-06	0.000338782	AT2G18800 AT2G06850 AT4G30270 AT4G14130 AT4G25810 AT5G57550	ATXTH21, XTH21 EXGT-A1, EXT, XTH4 MERI-5, MERI5B, SEN4, XTH24 XTH15, XTR7 XTH23, XTR6 XTH25, XTR3	xyloglucan endotransglucosylase/hydrolase 21 endoxyloglucan transferase (EXGT-A1) gene encodes a protein similar to endo xyloglucan transferase in sequence. It is also very similar to BRU1 in soybean, which is involved in brassinosteroid response. xyloglucan endotransglycosylase-related protein (XTR7) xyloglucan endotransglycosylase-related protein (XTR6) xyloglucan endotransglycosylase-related p…
Wa8730a007g002540	2890.47	1.89973	1.58074e-05	0.0031198	AT3G23820 AT2G47650	GAE6 UXS4	UDP-D-glucuronate 4-epimerase encodes a protein similar to UDP-glucuronic acid decarboxylase. UDP-glucuronic acid decarboxylase produces UDP-xylose, which is a substrate for many cell wall carbohydrates including hemicellulose and pectin. UDP-xylose is also known to feedback regulate several cell wall biosynthetic enzymes.
Wa8730a015g005150	165.268	1.8673	0.000263524	0.0328381
Wa8730a005g003030	206.086	1.82102	2.80295e-05	0.00486161	AT2G25820 AT2G36450 AT5G11590 AT5G25810 AT3G16280 AT4G32800	ESE2 HRD TINY2 tny	encodes a member of the DREB subfamily A-4 of ERF/AP2 transcription factor family. The protein contains one AP2 domain. There are 17 members in this subfamily including TINY. encodes a member of the DREB subfamily A-4 of ERF/AP2 transcription factor family. The protein contains one AP2 domain. There are 17 members in this subfamily including TINY. Ectopic overexpression of HRD increases the densi…
Wa8730a002g006370	560.789	1.69978	4.43971e-05	0.00712297	AT3G17680		Kinase interacting (KIP1-like) family protein
Wa8730a013g001230	464.356	1.6988	1.0585e-05	0.00219127
Wa8730a003g003310	363.446	1.63919	8.94985e-05	0.0132036	AT5G15580 AT3G02170 AT1G74160	LNG1, TRM2 LNG2, TRM1 TRM4	Encodes LONGIFOLIA1 (LNG1). Regulates leaf morphology by promoting cell expansion in the leaf-length direction. The LNG1 homologue LNG2 (At3g02170) has similar function. Encodes LONGIFOLIA2 (LNG2). Regulates leaf morphology by promoting cell expansion in the leaf-length direction. The LNG2 homologue LNG1 (At5g15580) has similar function.
Wa8730a010g003520	204343	1.55679	1.95922e-08	1.00586e-05	AT1G67090 AT5G38410	RBCS1A RBCS3B	Encodes a member of the Rubisco small subunit (RBCS) multigene family: RBCS1A (At1g67090), RBCS1B (At5g38430), RBCS2B (At5g38420), and RBCS3B (At5g38410). Functions to yield sufficient Rubisco content for leaf photosynthetic capacity. Encodes a member of the Rubisco small subunit (RBCS) multigene family: RBCS1A (At1g67090), RBCS1B (At5g38430), RBCS2B (At5g38420), and RBCS3B (At5g38410). Functions…
Wa8730a002g008060	1591.32	-1.52639	0.000420034	0.0477091	AT2G36690		2-oxoglutarate (2OG) and Fe(II)-dependent oxygenase superfamily protein
Wa8730a012g001880	1795.84	-1.58576	0.000417758	0.0477091	AT4G09150 AT1G22930		T-complex protein 11 T-complex protein 11
Wa8730a007g008470	2306.47	-1.62094	0.000371466	0.043741	AT5G42100 AT2G27500 AT4G34480 AT4G18340 AT2G16230	ATBG_PPAP, BG_PPAP	encodes a plasmodesmal (Pd)-associated membrane protein involved in plasmodesmal callose degradation, i.e. beta-1,3-glucanase (EC 3.2.1.39), and functions in the gating of Pd Glycosyl hydrolase superfamily protein O-Glycosyl hydrolases family 17 protein Glycosyl hydrolase superfamily protein O-Glycosyl hydrolases family 17 protein
Wa8730a018g000010	584.391	-1.68954	7.3995e-06	0.00175116	AT5G58770	AtcPT4, cPT4	Undecaprenyl pyrophosphate synthetase family protein
Wa8730a006g002270	1170.05	-1.69151	6.18742e-05	0.00945423	AT5G14500 AT3G01590		aldose 1-epimerase family protein Galactose mutarotase-like superfamily protein
Wa8730a007g002390	176.428	-1.73883	0.000360516	0.0432451	AT2G43120		Encodes a member of the functionally diverse cupin protein superfamily that is involved in susceptibility to the bacterial plant pathogen Ralstonia solanacearum. It stabilizes the papain-like cysteine protease XCP2. The mRNA is cell-to-cell mobile.
Wa8730a010g005570	277.772	-1.80635	1.01589e-05	0.00213754	AT5G59260 AT5G06740 AT5G55830 AT4G28350	LecRK-II.1 LecRK-S.5 LecRK-S.7 LecRK-VII.2	Concanavalin A-like lectin protein kinase family protein Concanavalin A-like lectin protein kinase family protein Concanavalin A-like lectin protein kinase family protein Concanavalin A-like lectin protein kinase family protein
Wa8730a006g006210	125.973	-1.81171	0.000224946	0.0291634
Wa8730a016g003110	212.857	-1.81356	6.18022e-05	0.00945423	AT1G48490 AT3G17850		Protein kinase superfamily protein Protein kinase superfamily protein
Wa8730a014g003530	2513.74	-1.8493	3.43651e-07	0.000126022	AT2G01850 AT1G14720 AT4G13090 AT4G18990 AT1G32170	ATXTH27, EXGT-A3, XTH27 ATXTH28, EXGT-A2, XTH28, XTR2 XTH2 XTH29 XTH30, XTR4	EXGT-A3 has homology to xyloglucan endotransglucosylases/hydrolases (XTHs). Mutants in this gene show a lesion mimic phenotype associated with leaf maturation and a reduction in the number of tertiary veins. Individual tracheary elements in the mutants are shorter, but phloem transport activity is not severely affected. EXGT-A3 plays a role in xyloglucan degradation in the differentiating trachea…
Wa8730a001g004100	1305.15	-1.86086	8.59508e-06	0.00190203	AT1G02660 AT3G62590		alpha/beta-Hydrolases superfamily protein alpha/beta-Hydrolases superfamily protein
Wa8730a019g003660	1595.86	-1.86425	1.34277e-07	5.22255e-05	AT3G08720 AT3G17510 AT1G48260	ATPK19, ATPK2, ATS6K2, S6K2 CIPK1, SnRK3.16 CIPK17, SnRK3.21	Encodes a ribosomal-protein S6 kinase. Gene expression is induced by cold and salt (NaCl). Activation of AtS6k is regulated by 1-naphthylacetic acid and kinetin, at least in part, via a lipid kinase-dependent pathway. Phosphorylates specifically mammalian and plant S6 at 25 degrees C but not at 37 degrees C. Involved in translational up-regulation of ribosomal proteins. Encodes a CBL-interacting …
Wa8730a009g002480	294.139	-1.86996	4.05149e-05	0.00669264	AT1G02860 AT2G38920	BAH1, NLA	Encodes a likely ubiquitin E3 ligase with RING and SPX domains that is involved in mediating immune responses. Targeted by MIR827. SPX (SYG1/Pho81/XPR1) domain-containing protein / zinc finger (C3HC4-type RING finger) protein-related
Wa8730a011g002630	187.855	-1.89733	0.000162637	0.0215201
Wa8730a007g003310	2525.52	-1.90261	1.19337e-05	0.00239326	AT1G74110	CYP78A10	member of CYP78A
Wa8730a018g002170	275.501	-1.97817	0.000128376	0.0175288	AT1G02660 AT3G62590		alpha/beta-Hydrolases superfamily protein alpha/beta-Hydrolases superfamily protein
Wa8730a010g000100	4097.66	-1.98745	1.04011e-08	6.35704e-06	AT3G16340 AT3G53480	ABCG29, ATPDR1, AtABCG29, PDR1 ABCG37, ATPDR9, PDR9, PIS1	Encodes a p-coumaryl alcohol exporter involved in lignin biosynthesis. Negative regulator of auxin polar transport inhibitors. ABCG37 regulates auxin distribution and homeostasis in roots by excluding IBA from the root apex, but does not act directly in basipetal transport. ABCG37 and ABCG36 act redundantly at outermost root plasma membranes and, transport IBA out of the cells.
Wa8730a001g011810	404.866	-1.99344	0.000398741	0.0465258
Wa8730a014g003340	2807.04	-2.02289	1.48371e-14	3.80869e-11	AT2G01850 AT1G14720 AT4G13090 AT4G18990 AT1G32170	ATXTH27, EXGT-A3, XTH27 ATXTH28, EXGT-A2, XTH28, XTR2 XTH2 XTH29 XTH30, XTR4	EXGT-A3 has homology to xyloglucan endotransglucosylases/hydrolases (XTHs). Mutants in this gene show a lesion mimic phenotype associated with leaf maturation and a reduction in the number of tertiary veins. Individual tracheary elements in the mutants are shorter, but phloem transport activity is not severely affected. EXGT-A3 plays a role in xyloglucan degradation in the differentiating trachea…
Wa8730a006g004570	151.452	-2.04006	7.64044e-06	0.00175116	AT3G07700		ABC1K7 is a member of an atypical protein kinase family that is induced by salt stress. Loss of function mutations affect the metabolic profile of chloroplast lipids. It appears to function along with ABC1K8 in mediating lipid membrane changes in response to stress.
Wa8730a017g001840	273.586	-2.04384	0.000263026	0.0328381	AT5G51460 AT4G12430 AT4G22590	ATTPPA, TPPA TPPF TPPG	homologous to the C-terminal part of microbial trehalose-6-phosphate phosphatases Haloacid dehalogenase-like hydrolase (HAD) superfamily protein Haloacid dehalogenase-like hydrolase (HAD) superfamily protein
Wa8730a010g001460	890.161	-2.07055	7.20578e-05	0.0108807	AT4G29010 AT3G06860	AIM1 ATMFP2, MFP2	Functions in beta-oxidation of fatty acids, similar to CuMFP with L-3-hydroxyacyl-CoA hydrolyase , L-3-hydroxyacyl-dehydrogenase, D-3-hydroxyacyl-CoA epimerase, and 3, 2-enoyl-CoA isomerase activities Encodes a multifunctional protein. Involved in peroxisomal fatty acid beta oxidation. Loss-of-function mutant lacks hydroxyacyl-CoA dehydrogenase activity and have reduced levels of long-chain enoyl…
Wa8730a002g004710	264.343	-2.07347	2.5466e-05	0.00456372	AT4G24230	ACBP3	acyl-CoA-binding protein ACBP3. Localized extracellularly in transiently expressed tobacco BY-2 cells and onion epidermal cells. Binds arachidonyl-CoA with high affinity.
Wa8730a007g002270	183.881	-2.08663	1.60426e-05	0.0031198	AT1G05490	chr31	chromatin remodeling 31
Wa8730a003g000500	72.3241	-2.1301	0.000367033	0.0436192
Wa8730a018g002840	218.192	-2.14689	3.82561e-08	1.86769e-05	AT2G41410		Calcium-binding EF-hand family protein
Wa8730a013g000520	731.977	-2.16316	2.42801e-11	3.11635e-08
Wa8730a011g003230	238.214	-2.19211	2.13302e-05	0.00391105	AT1G73680	ALPHA, alpha-DOX2	Encodes an alpha dioxygenase. Recombinant protein catalyzes the conversion of a wide range of fatty acids into 2(R)-hydroperoxy derivatives.
Wa8730a010g000520	191.6	-2.19403	4.0672e-05	0.00669264	AT1G04220 AT5G43760	KCS2 KCS20	Encodes KCS2, a member of the 3-ketoacyl-CoA synthase family involved in the biosynthesis of VLCFA (very long chain fatty acids). Encodes KCS20, a member of the 3-ketoacyl-CoA synthase family involved in the biosynthesis of VLCFA (very long chain fatty acids).
Wa8730a002g010620	50.5563	-2.23281	0.000331244	0.0401087
Wa8730a015g003140	963.937	-2.23546	4.89201e-07	0.0001697	AT3G57680		Peptidase S41 family protein
Wa8730a008g005590	117.848	-2.24271	9.53039e-06	0.00203871	AT4G21380 AT1G11410 AT4G03230 AT1G61420 AT4G27300	ARK3, RK3	encodes a putative receptor-like serine/threonine protein kinases that is similar to Brassica self-incompatibility (S) locus. Expressed in root. Shoot expression limited to limited to the root-hypocotyl transition zone and at the base of lateral roots as well as in axillary buds, and pedicels. S-locus lectin protein kinase family protein S-locus lectin protein kinase family protein S-locus lectin…
Wa8730a015g000860	2074.65	-2.29057	3.30909e-15	1.19577e-11	AT5G48070 AT2G18800 AT4G30270 AT4G25810 AT5G57550	ATXTH20, XTH20 ATXTH21, XTH21 MERI-5, MERI5B, SEN4, XTH24 XTH23, XTR6 XTH25, XTR3	putative xyloglucan endotransglycosylase/hydrolase, expressed primarily in the stele of mature non-elongating regions of both the main and the lateral root. Is expressed in lateral root primordia but expression ceases after lateral root begins to grow. xyloglucan endotransglucosylase/hydrolase 21 encodes a protein similar to endo xyloglucan transferase in sequence. It is also very similar to BRU1…
Wa8730a020g001680	1289.74	-2.2911	2.06261e-12	3.3092e-09	AT1G17420 AT1G67560	ATLOX3, LOX3 ATLOX6, LOX6	Lipoxygenase PLAT/LH2 domain-containing lipoxygenase family protein
Wa8730a015g002900	133.955	-2.29318	9.40378e-05	0.0137156	AT3G07900 AT2G44500		O-fucosyltransferase family protein O-fucosyltransferase family protein
Wa8730a009g002920	47.6195	-2.30667	0.000270759	0.0334153	AT2G26780		ARM repeat superfamily protein
Wa8730a006g000980	1088.03	-2.30981	3.31223e-10	3.27019e-07	AT3G22120 AT4G15160 AT1G62500	CWLP	cell wall-plasma membrane linker protein homolog (CWLP) Bifunctional inhibitor/lipid-transfer protein/seed storage 2S albumin superfamily protein Bifunctional inhibitor/lipid-transfer protein/seed storage 2S albumin superfamily protein
Wa8730a012g004810	681.976	-2.34155	8.85372e-10	8.11696e-07	AT5G65110	ACX2, ATACX2	Encodes an acyl-CoA oxidase presumably involved in long chain fatty acid biosynthesis.
Wa8730a017g002980	84.0603	-2.36726	4.86247e-05	0.00770491	AT4G04970 AT2G36850	ATGSL01, ATGSL1, GSL01, GSL1 ATGSL08, ATGSL8, CHOR, ET2, GSL08, GSL8	encodes a gene similar to callose synthase Encodes GSL8, a member of the Glucan Synthase-Like (GSL) family believed to be involved in the synthesis of the cell wall component callose. GSL8 is required for male gametophyte development and plant growth. Has a role in entry of microspores into mitosis. Also refer to GSL10 (At3g07160).
Wa8730a002g000490	128.577	-2.42997	3.51669e-06	0.000902734
Wa8730a003g004430	331.224	-2.47918	1.28207e-07	5.21745e-05	AT1G55020 AT3G22400	ATLOX1, LOX1 ATLOX5, LOX5	lipoxygenase, a defense gene conferring resistance Xanthomonas campestris Encodes lipoxygenase5 (LOX5). LOX5 activity in roots facilitates green peach aphid colonization of Arabidopsis foliage by promoting green peach aphid feeding from sieve element and water consumption from xylem.
Wa8730a013g001000	446.945	-2.48025	2.75509e-11	3.21469e-08
Wa8730a001g000170	166.52	-2.50877	7.86326e-07	0.000246158	AT3G07160	ATGSL10, CALS9, GSL10, gsl10	Encodes GSL10, a member of the Glucan Synthase-Like (GSL) family believed to be involved in the synthesis of the cell wall component callose. GSL10 is required for male gametophyte development and plant growth. Has a role in entry of microspores into mitosis. GSL10 mutation leads to perturbation of microspore division symmetry, irregular callose deposition and failure of generative cell engulfmen…
Wa8730a017g003400	254.009	-2.51118	5.78669e-09	3.71361e-06	AT1G17620		Late embryogenesis abundant (LEA) hydroxyproline-rich glycoprotein family
Wa8730a012g003220	83.5045	-2.55123	0.000261999	0.0328381
Wa8730a001g001390	74.1708	-2.60567	4.43799e-07	0.000158227	AT3G10320 AT2G41640 AT3G57380		MUCI21 is a GT61 protein required for the production of highly branched xylan in seed coat mucilage. MUCI21 likely decorates xylan with xylose side chains that seem to be necessary for pectin attachment to the seed surface. Glycosyltransferase family 61 protein Glycosyltransferase family 61 protein
Wa8730a005g001110	43.4289	-2.63584	3.64733e-05	0.00624179	AT2G25730
Wa8730a005g005610	67.7382	-2.6881	0.000110032	0.0153507	AT3G15040 AT1G29640 AT2G34340 AT4G04630		Protein of unknown function, DUF584 Protein of unknown function, DUF584 Protein of unknown function, DUF584 Protein of unknown function, DUF584
Wa8730a012g004900	97.6917	-2.71458	5.11014e-09	3.45203e-06	AT5G10180 AT1G78000 AT4G08620 AT1G22150	AST68, SULTR2 1 SEL1, SULTR1 2 SULTR1 1 SULTR1 3	Encodes a low-affinity sulfate transporter expressed in the root cap and central cylinder, where it is induced by sulfur starvation. Expression in the shoot vascular system is not induced by sulfur starvation. Encodes a sulfate transporter that can restore sulfate uptake capacity of a yeast mutant lacking sulfate transporter genes. Encodes a sulfate transporter. Contains STAS domain. Expressed in…
Wa8730a014g003990	1152.75	-2.72457	9.73396e-08	4.16451e-05	AT4G22920 AT4G11910	ATNYE1, NYE1, SGR	Similar to the tomato senescence-inducible chloroplast stay-green protein 1. It is upregulated during maximal senescence in the Arabidopsis life cycle, especially in senescent leaves. Acts antagonistically with SGR1 to balance chlorophyll catabolism in chloroplasts with the dismantling and remobilizing of other cellular components in senescing leaf cells.
Wa8730a002g004500	81.0707	-2.79909	3.93218e-08	1.86769e-05	AT4G38600	KAK, UPL3	encodes a member of HECT ubiquitin protein ligase family that is involved in trichome cell morphogenesis. Mutants in this gene exhibit supernumerary trichome branches and increased DNA content.
Wa8730a017g001830	41.8956	-2.83807	0.000140446	0.018975
Wa8730a007g002240	60.3179	-2.91311	1.30765e-08	7.29724e-06
Wa8730a002g003550	32.2153	-2.93977	4.16481e-05	0.0067665
Wa8730a017g000880	98.7307	-2.9659	7.2459e-07	0.000232503	AT4G17100
Wa8730a005g008690	191.36	-2.98437	1.28764e-06	0.000367265	AT3G17980 AT1G66360 AT2G01540 AT1G73580 AT1G70790 AT1G48590	AtC2, AtGAP1, C2	Calcium-dependent lipid-binding (CaLB domain) family protein Calcium-dependent lipid-binding (CaLB domain) family protein Calcium-dependent lipid-binding (CaLB domain) family protein Calcium-dependent lipid-binding (CaLB domain) family protein Calcium-dependent lipid-binding (CaLB domain) family protein Calcium-dependent lipid-binding (CaLB domain) family protein
Wa8730a001g002220	606.764	-2.98725	1.30081e-07	5.21745e-05	AT4G30880		Bifunctional inhibitor/lipid-transfer protein/seed storage 2S albumin superfamily protein
Wa8730a010g004770	136.533	-3.01719	1.36997e-09	1.17223e-06
Wa8730a004g004280	245.936	-3.05252	4.21504e-18	5.41001e-14	AT5G11210	ATGLR2.5, GLR2.5	member of Putative ligand-gated ion channel subunit family
Wa8730a005g001270	189.611	-3.10123	6.30155e-08	2.78898e-05	AT2G21860		violaxanthin de-epoxidase-related
Wa8730a001g000820	86.6596	-3.13585	3.88164e-05	0.00655538	AT3G06483	ATPDHK, PDK	Pyruvate dehydrogenase kinase (PDK) specifically phosphorylates the E1&#945 subunit of the pyruvate dehydrogenase complex (PDC) on a Ser residue using ATP as a phosphate donor. PDK is a unique type of protein kinase having a His-kinase-like sequence but Ser-kinase activity. Site-directed mutagenesis and structural analysis indicate that PDK belongs to the GHKL superfamily.
Wa8730a011g002830	30.1445	-3.17602	8.85207e-06	0.0019257	AT2G14560	LURP1	Encodes LURP1, a member of the LURP cluster (late upregulated in response to Hyaloperonospora parasitica) which exhibits a pronounced upregulation after recognition of the pathogenic oomycte H. parasitica. LURP1 is required for full basal defense to H. parasitica and resistance to this pathogen mediated by the R-proteins RPP4 and RPP5.
Wa8730a011g004740	86.5025	-3.35986	1.82153e-05	0.00338831	AT1G55760		BTB/POZ domain-containing protein
Wa8730a001g011400	57.4343	-3.50983	1.77992e-05	0.0033596	AT3G46355 AT4G35780 AT5G59670 AT5G02070 AT4G31100	NA STY17	NA ACT-like protein tyrosine kinase family protein Leucine-rich repeat protein kinase family protein Protein kinase family protein wall-associated kinase, putative
Wa8730a003g002100	24.6409	-3.54277	2.59551e-05	0.00456372	AT1G27750		nucleic acid binding
Wa8730a004g002910	85.4104	-3.5453	1.57052e-08	8.39903e-06	AT5G42180 AT4G25980 AT4G30170 AT4G17690 AT4G36430 AT5G19880 AT4G11290	PER64	Peroxidase superfamily protein Peroxidase superfamily protein Peroxidase family protein Peroxidase superfamily protein Peroxidase superfamily protein Peroxidase superfamily protein Peroxidase superfamily protein
Wa8730a011g005750	118.166	-3.62961	2.11847e-13	4.53175e-10	AT5G24860 AT5G10625	ATFPF1, FPF1	encodes a small protein of 12.6 kDa that regulates flowering and is involved in gibberellin signalling pathway. It is expressed in apical meristems immediately after the photoperiodic induction of flowering. Genetic interactions with flowering time and floral organ identity genes suggest that this gene may be involved in modulating the competence to flower. There are two other genes similar to FP…
Wa8730a002g009150	19.2861	-3.64903	0.000142245	0.0190179	AT1G65060 AT4G19010	4CL3	encodes an isoform of 4-coumarate:CoA ligase (4CL), which is involved in the last step of the general phenylpropanoid pathway. mRNA levels are not induced in response to wounding or to fungal infection by P. parasitica. mRNA is expressed in flowers, to a lesser degree in mature leaves and siliques and marginally in seedling roots and bolting stems of mature plants. The catalytic efficiency was in…
Wa8730a016g004020	240.842	-3.67816	1.81157e-12	3.3092e-09
Wa8730a002g003570	26.9323	-3.68904	7.91142e-06	0.00178146	AT5G42180 AT5G66390 AT1G71695 AT5G24070 AT4G33420 AT2G38390 AT5G51890 AT2G18140 AT1G77100 AT2G35380 AT4G26010 AT3G03670	PER64 PRX72	Peroxidase superfamily protein Encodes a peroxidase that is involved in lignin biosynthesis. Peroxidase superfamily protein Peroxidase superfamily protein Peroxidase superfamily protein Peroxidase superfamily protein encodes peroxidase involved in the lignification of tracheary elements (TE) in roots Peroxidase superfamily protein Peroxidase superfamily protein Peroxidase superfamily protein Pero…
Wa8730a008g004510	48.4725	-3.94005	4.71296e-09	3.3606e-06	AT2G32300 AT1G22480	UCC1	Encodes a uclacyanin, a protein precursor that is closely related to precursors of stellacyanins and a blue copper protein from pea pods. Cupredoxin superfamily protein
Wa8730a009g001780	212.266	-3.96327	1.18992e-15	7.63632e-12	AT3G63110 AT5G19040 AT3G23630	ATIPT3, IPT3 ATIPT5, IPT5 ATIPT7, IPT7	Encodes cytokinin synthase involved in cytokinin biosynthesis. IPT3 subcellular localization is modulated by farnesylation- when farnesylated it is localized to the nucleus, otherwise to the chloroplast. Encodes cytokinin synthase. Encodes an isopentenyl transferase involved in cytokinin biosynthesis.
Wa8730a010g002480	142.673	-3.98912	0.000405394	0.0468759	AT2G31750	UGT74D1	Encodes an auxin glycosyltransferase that is likely to be involved in regulation of auxin by glycosylation.
Wa8730a019g000660	150.688	-4.1883	1.07867e-11	1.53831e-08	AT5G59820 AT2G37430 AT2G28710 AT1G02030 AT5G03510 AT3G46070 AT3G53600	AtZAT12, RHL41, ZAT12 ZAT11	Encodes a zinc finger protein involved in high light and cold acclimation. Overexpression of this putative transcription factor increases the expression level of 9 cold-responsive genes and represses the expression level of 15 cold-responsive genes, including CBF genes. Also, lines overexpressing this gene exhibits a small but reproducible increase in freeze tolerance. Because of the repression o…
Wa8730a015g001340	268.875	-4.20239	5.91783e-05	0.00926284	AT1G17145		RING/U-box superfamily protein
Wa8730a010g000130	500.017	-4.20836	2.59565e-05	0.00456372	AT2G25625
Wa8730a013g003490	14.7389	-4.29984	0.000280914	0.0343384	AT1G21140 AT1G76800		The gene encodes nodulin-like1 whose transcript abundance was repressed under conditions of Fe-deficient growth. The gene encodes nodulin-like2 whose transcript abundance was repressed under conditions of Fe-deficient growth.
Wa8730a005g005710	45.5584	-4.33489	1.83567e-06	0.000512193	AT1G29680 AT5G45690 AT4G18920		Protein of unknown function (DUF1264) Protein of unknown function (DUF1264) Protein of unknown function (DUF1264)
Wa8730a019g000680	50.2468	-4.39157	1.50985e-09	1.21119e-06	AT5G59820 AT2G37430 AT3G46090 AT2G28710 AT1G02030 AT5G03510 AT3G53600	AtZAT12, RHL41, ZAT12 ZAT11 ZAT7	Encodes a zinc finger protein involved in high light and cold acclimation. Overexpression of this putative transcription factor increases the expression level of 9 cold-responsive genes and represses the expression level of 15 cold-responsive genes, including CBF genes. Also, lines overexpressing this gene exhibits a small but reproducible increase in freeze tolerance. Because of the repression o…
Wa8730a013g003480	19.6985	-5.17793	1.66153e-05	0.00318295	AT1G21140 AT1G76800		The gene encodes nodulin-like1 whose transcript abundance was repressed under conditions of Fe-deficient growth. The gene encodes nodulin-like2 whose transcript abundance was repressed under conditions of Fe-deficient growth.
Wa8730a019g000700	35.9123	-5.30844	5.49483e-07	0.000182477	AT5G59820 AT2G37430 AT2G28710 AT1G02030 AT5G03510 AT3G46070 AT3G53600	AtZAT12, RHL41, ZAT12 ZAT11	Encodes a zinc finger protein involved in high light and cold acclimation. Overexpression of this putative transcription factor increases the expression level of 9 cold-responsive genes and represses the expression level of 15 cold-responsive genes, including CBF genes. Also, lines overexpressing this gene exhibits a small but reproducible increase in freeze tolerance. Because of the repression o…
Wa8730a016g001950	69.9541	-5.60454	3.72658e-15	1.19577e-11	AT4G19230 AT3G19270	CYP707A1 CYP707A4	Encodes a protein with ABA 8'-hydroxylase activity, involved in ABA catabolism. Member of the CYP707A gene family. CYP707A1 appears to play an important role in determining the ABA levels in dry seeds. Gene involved in postgermination growth. Overexpression of CYP707A1 leads to a decrease in ABA levels and a reduction in after-ripening period to break dormancy. Encodes a protein with ABA 8'-hydro…
Wa8730a019g001320	10.2347	-6.707	0.000109815	0.0153507	AT1G45201 AT2G30550	ATTLL1, TLL1 DALL3	Target of AtGRP7 regulation. Encodes a lipase that hydrolyzes phosphatidylcholine, glycolipids as well as triacylglycerols.

## Sheet: Mother Frond DEG GO
Dataset S6. Enriched GO terms for Differentially Expressed Genes for Mother Fronds
GO	Name	Ratio in Study	Ratio in Pop.	p Value	Depth	Study Count	p Value (BH-FDR)	Study Items
GO:0071241	cellular response to inorganic substance	6/83	48/13944	3.72151e-07	4	6	0.00257342	Wa8730a011g003230, Wa8730a013g003480, Wa8730a013g003490, Wa8730a019g000660, Wa8730a019g000680, Wa8730a019g000700
GO:0010045	response to nickel cation	3/83	5/13944	2.01633e-06	5	3	0.00464765	Wa8730a019g000660, Wa8730a019g000680, Wa8730a019g000700
GO:0071289	cellular response to nickel ion	3/83	5/13944	2.01633e-06	6	3	0.00464765	Wa8730a019g000660, Wa8730a019g000680, Wa8730a019g000700
GO:0034440	lipid oxidation	5/83	40/13944	3.69609e-06	6	5	0.00579457	Wa8730a003g004430, Wa8730a010g001460, Wa8730a011g003230, Wa8730a012g004810, Wa8730a020g001680
GO:0071248	cellular response to metal ion	5/83	41/13944	4.18985e-06	5	5	0.00579457	Wa8730a013g003480, Wa8730a013g003490, Wa8730a019g000660, Wa8730a019g000680, Wa8730a019g000700
GO:0030258	lipid modification	6/83	79/13944	7.27863e-06	5	6	0.00838862	Wa8730a003g000500, Wa8730a003g004430, Wa8730a010g001460, Wa8730a011g003230, Wa8730a012g004810, Wa8730a020g001680
GO:0009643	photosynthetic acclimation	3/83	9/13944	1.66477e-05	6	3	0.0164456	Wa8730a019g000660, Wa8730a019g000680, Wa8730a019g000700

## Sheet: Daughter Frond DEG GO
Dataset S6. Enriched GO terms for Differentially Expressed Genes for Daughter Fronds
GO	Name	Ratio in Study	Ratio in Pop.	p Value	Depth	Study Count	p Value (BH-FDR)	Study Items
GO:0046519	sphingoid metabolic process	4/31	27/13944	3.38e-07	7	4	0.00234	Wa8730a009g003150, Wa8730a009g003160, Wa8730a009g003220, Wa8730a017g000080
GO:0030148	sphingolipid biosynthetic process	4/31	36/13944	1.12e-06	7	4	0.002912	Wa8730a009g003150, Wa8730a009g003160, Wa8730a009g003220, Wa8730a017g000080
GO:0008610	lipid biosynthetic process	7/31	259/13944	1.26e-06	4	7	0.002912	Wa8730a001g012630, Wa8730a009g003150, Wa8730a009g003160, Wa8730a009g003220, Wa8730a015g005150, Wa8730a017g000080, Wa8730a020g000180
GO:0097164	ammonium ion metabolic process	4/31	42/13944	2.11e-06	3	4	0.003526	Wa8730a009g003150, Wa8730a009g003160, Wa8730a009g003220, Wa8730a017g000080
GO:0006665	sphingolipid metabolic process	4/31	44/13944	2.55e-06	6	4	0.003526	Wa8730a009g003150, Wa8730a009g003160, Wa8730a009g003220, Wa8730a017g000080
GO:0046520	sphingoid biosynthetic process	3/31	15/13944	4.45e-06	8	3	0.005124	Wa8730a009g003150, Wa8730a009g003160, Wa8730a009g003220
GO:0046467	membrane lipid biosynthetic process	4/31	66/13944	1.31e-05	6	4	0.012924	Wa8730a009g003150, Wa8730a009g003160, Wa8730a009g003220, Wa8730a017g000080
GO:0006643	membrane lipid metabolic process	4/31	73/13944	1.95e-05	5	4	0.016893	Wa8730a009g003150, Wa8730a009g003160, Wa8730a009g003220, Wa8730a017g000080
GO:0006629	lipid metabolic process	7/31	428/13944	3.39e-05	3	7	0.026068	Wa8730a001g012630, Wa8730a009g003150, Wa8730a009g003160, Wa8730a009g003220, Wa8730a015g005150, Wa8730a017g000080, Wa8730a020g000180
GO:1901576	organic substance biosynthetic process	11/31	1255/13944	4.68e-05	3	11	0.032341	Wa8730a001g012630, Wa8730a007g002540, Wa8730a009g003150, Wa8730a009g003160, Wa8730a009g003220, Wa8730a010g002220, Wa8730a013g001230, Wa8730a014g004530, Wa8730a015g005150, Wa8730a017g000080, Wa8730a020g000180
GO:0009058	biosynthetic process	11/31	1302/13944	6.57e-05	2	11	0.041286	Wa8730a001g012630, Wa8730a007g002540, Wa8730a009g003150, Wa8730a009g003160, Wa8730a009g003220, Wa8730a010g002220, Wa8730a013g001230, Wa8730a014g004530, Wa8730a015g005150, Wa8730a017g000080, Wa8730a020g000180
GO:0042284	sphingolipid delta-4 desaturase activity	3/31	11/13944	1.62e-06	4	3	0.003836	Wa8730a009g003150, Wa8730a009g003160, Wa8730a009g003220
