# Supplementary material for: Streamlined spatial and environmental expression signatures characterize the minimalist duckweedWolffia australiana
Source: HighWire-hosted journal article supplement (doi:10.1101/gr.279091.124), 2024-07-01
Supplement: Supplemental_Dataset_S7.xlsx [file Supplemental_Dataset_S7.xlsx]

## Sheet: SC A DEGs
Dataset S7. Differentially Expressed Genes for Dawn Supercluster A
Genes showing significant differential expression (log2FC>1 & p_val_adj <0.05 & PCT1 > 10%) in the given supercluster versus all other cells in the dataset
PCT1: Percentage of cells within the Supercluster expressing the gene
PCT2: Percentage of cells outside the Supercluster expressing the gene
DEGs also of Dusk Supercluster A
Gene	Ave. Log2 FC	p Value	p Value Adj.	PCT1	PCT2	Arabidopsis orthologues	Arabidopsis gene names	Arabidopsis gene description
Wa8730a009g001610	6.73002	0	0	0.943	0.146	AT5G59320	LTP3	Predicted to encode a PR (pathogenesis-related) protein. Belongs to the lipid transfer protein (PR-14) family with the following members: At2g38540/LTP1, At2g38530/LTP2, At5g59320/LTP3, At5g59310/LTP4, At3g51600/LTP5, At3g08770/LTP6, At2g15050/LTP7, At2g18370/LTP8, At2g15325/LTP9, At5g01870/LTP10, At4g33355/LTP11, At3g51590/LTP12, At5g44265/LTP13, At5g62065/LTP14, At4g08530/LTP15.
Wa8730a001g001120	5.00619	0	0	0.937	0.066
Wa8730a014g001630	4.61032	0	0	0.851	0.045
Wa8730a001g007340	4.49621	0	0	0.936	0.102	AT2G18800;AT2G06850;AT4G30270;AT4G14130;AT4G25810;AT5G57550	ATXTH21, XTH21;EXGT-A1, EXT, XTH4;MERI-5, MERI5B, SEN4, XTH24;XTH15, XTR7;XTH23, XTR6;XTH25, XTR3	xyloglucan endotransglucosylase/hydrolase 21;endoxyloglucan transferase (EXGT-A1) gene;encodes a protein similar to endo xyloglucan transferase in sequence. It is also very similar to BRU1 in soybean, which is involved in brassinosteroid response.;xyloglucan endotransglycosylase-related protein (XTR7);xyloglucan endotransglycosylase-related protein (XTR6);xyloglucan endotransglycosylase-related p…
Wa8730a015g005520	4.34275	0	0	0.93	0.027
Wa8730a005g008830	4.29506	0	0	0.99	0.41	AT1G30020		Protein of unknown function, DUF538
Wa8730a009g003660	4.21234	2.71134e-142	3.78015e-138	0.646	0.177	AT2G38530	LP2, LTP2, cdf3	Involved in lipid transfer between membranes. Belongs to a family of Lipid transfer proteins. Sequence similarity to other plant/Arabidopsis LPT genes but highest similarity to LPT1. Stress and pathogen-inducible motifs found in the upstream region. Expressed in flower, leaves and siliques but absent in roots. Predicted to be a member of PR-14 pathogenesis-related protein family with the followin…
Wa8730a014g001620	4.21211	0	0	0.795	0.024
Wa8730a008g000530	4.20796	0	0	0.821	0.061
Wa8730a005g003480	3.86618	8.20868e-291	1.14445e-286	0.726	0.043	AT5G25610	ATRD22, RD22	responsive to dehydration 22 (RD22) mediated by ABA
Wa8730a008g003430	3.85336	2.67851e-240	3.73438e-236	0.673	0.054
Wa8730a016g003000	3.69337	0	0	0.997	0.421	AT1G68530;AT1G25450;AT2G26640;AT1G19440;AT1G71160	CER6, CUT1, G2, KCS6, POP1;CER60, KCS5;KCS11;KCS4;KCS7	Encodes KCS6, a member of the 3-ketoacyl-CoA synthase family involved in the biosynthesis of VLCFA (very long chain fatty acids).;Encodes KCS5, a member of the 3-ketoacyl-CoA synthase family involved in the biosynthesis of VLCFA (very long chain fatty acids).;Encodes KCS11, a member of the 3-ketoacyl-CoA synthase family involved in the biosynthesis of VLCFA (very long chain fatty acids).;Encodes …
Wa8730a003g005260	3.67666	0	0	0.891	0.151	AT1G68530;AT1G25450;AT2G26640;AT4G34510;AT5G43760;AT1G19440	CER6, CUT1, G2, KCS6, POP1;CER60, KCS5;KCS11;KCS17;KCS20;KCS4	Encodes KCS6, a member of the 3-ketoacyl-CoA synthase family involved in the biosynthesis of VLCFA (very long chain fatty acids).;Encodes KCS5, a member of the 3-ketoacyl-CoA synthase family involved in the biosynthesis of VLCFA (very long chain fatty acids).;Encodes KCS11, a member of the 3-ketoacyl-CoA synthase family involved in the biosynthesis of VLCFA (very long chain fatty acids).;Encodes …
Wa8730a003g005060	3.56913	0	0	0.797	0.01	AT1G68530;AT1G25450;AT2G26640;AT4G34510;AT5G43760;AT1G19440	CER6, CUT1, G2, KCS6, POP1;CER60, KCS5;KCS11;KCS17;KCS20;KCS4	Encodes KCS6, a member of the 3-ketoacyl-CoA synthase family involved in the biosynthesis of VLCFA (very long chain fatty acids).;Encodes KCS5, a member of the 3-ketoacyl-CoA synthase family involved in the biosynthesis of VLCFA (very long chain fatty acids).;Encodes KCS11, a member of the 3-ketoacyl-CoA synthase family involved in the biosynthesis of VLCFA (very long chain fatty acids).;Encodes …
Wa8730a004g007430	3.48878	4.61466e-307	6.43375e-303	0.989	0.603
Wa8730a014g005820	3.48009	0	0	0.844	0.092	AT3G10280;AT4G34510;AT1G04220;AT5G43760;AT1G19440;AT2G16280	KCS14;KCS17;KCS2;KCS20;KCS4;KCS9	Encodes KCS14, a member of the 3-ketoacyl-CoA synthase family involved in the biosynthesis of VLCFA (very long chain fatty acids).;Encodes KCS17, a member of the 3-ketoacyl-CoA synthase family involved in the biosynthesis of VLCFA (very long chain fatty acids).;Encodes KCS2, a member of the 3-ketoacyl-CoA synthase family involved in the biosynthesis of VLCFA (very long chain fatty acids).;Encodes…
Wa8730a018g002300	3.455	6.20001e-278	8.64406e-274	0.805	0.106	AT5G57800	CER3, FLP1, WAX2, YRE	encodes a transmembrane protein with similarity to the sterol desaturase family at the N-terminus and to the short-chain dehydrogenase/reductase family at the C-terminus. Mutant analyses indicate this protein is involved in cuticle membrane and wax biosynthesis.
Wa8730a006g005060	3.35215	0	0	0.917	0.094	AT5G15290;AT1G14160	CASP5	Uncharacterised protein family (UPF0497);Uncharacterised protein family (UPF0497)
Wa8730a004g002220	3.14935	3.2921e-261	4.58985e-257	0.61	0.012	AT5G55620;AT5G41761
Wa8730a009g001730	3.06592	5.24077e-299	7.30668e-295	0.934	0.268	AT2G41290;AT1G08470;AT3G57030;AT3G51440	SSL2;SSL3	Although this enzyme is predicted to encode a strictosidine synthase (SS), it lacks a conserved catalytic glutamate residue found in active SS enzymes and it is not expected to have SS activity.;Although this enzyme is predicted to encode a strictosidine synthase (SS), it lacks a conserved catalytic glutamate residue found in active SS enzymes and it is not expected to have SS activity.;Calcium-d…
Wa8730a008g000650	2.98434	2.73156e-291	3.80834e-287	0.989	0.524
Wa8730a017g001990	2.9519	7.04837e-296	9.82684e-292	0.838	0.113
Wa8730a020g002750	2.87158	4.70543e-305	6.56031e-301	0.703	0.017	AT1G67730;AT1G24470	ATKCR1, KCR1, YBR159;ATKCR2, KCR2	Encodes one of the two Arabidopsis homologues to YBR159w encoding a S. cerevisiae beta-ketoacyl reductase (KCR), which catalyzes the first reduction during VLCFA (very long chain fatty acids, >18 carbon) elongation: KCR1 (At1g67730), KCR2 (At1g24470). Complementation of the yeast ybr159Delta mutant demonstrated that the two KCR proteins are divergent and that only AtKCR1 can restore heterologous …
Wa8730a001g011170	2.85363	2.93614e-306	4.09356e-302	0.844	0.115	AT5G02540;AT2G37540;AT4G11410		NAD(P)-binding Rossmann-fold superfamily protein;NAD(P)-binding Rossmann-fold superfamily protein;NAD(P)-binding Rossmann-fold superfamily protein
Wa8730a012g004670	2.84549	1.18963e-212	1.65859e-208	0.606	0.051	AT4G39980;AT4G33510;AT1G22410	DHS1;DHS2;	Encodes a 2-deoxy-D-arabino-heptulosonate 7-phosphate (DAHP) synthase, which catalyzes the first committed step in aromatic amino acid biosynthesis. Gene expression is induced by wounding and pathogenic bacteria Pseudomonas syringae.;Enzyme catalyzing the first committed step in aromatic amino acid biosynthesis;Class-II DAHP synthetase family protein
Wa8730a013g001880	2.79837	4.43268e-250	6.18005e-246	0.662	0.039	AT1G07240	UGT71C5	Encodes a UDP-glucosyltransferase that plays a role in abscisic acid (ABA) glucosylation from ABA to ABA-glucose ester and regulates ABA homeostasis, thereby influencing the ABA signal network.
Wa8730a019g001620	2.76957	0	0	0.746	0.014	AT3G66658;AT1G44170	ALDH22A1;ALDH3H1, ALDH4	Encodes a putative aldehyde dehydrogenase. The gene is not responsive to osmotic stress and is expressed constitutively at a low level in plantlets and root cultures.;Encodes a protein similar to the aldehyde dehydrogenase cp-ADH from C.plantagineum. Constitutively expressed at low levels.
Wa8730a002g009150	2.75568	1.00462e-295	1.40064e-291	0.659	0.005	AT1G65060;AT4G19010	4CL3	encodes an isoform of 4-coumarate:CoA ligase (4CL), which is involved in the last step of the general phenylpropanoid pathway. mRNA levels are not induced in response to wounding or to fungal infection by P. parasitica. mRNA is expressed in flowers, to a lesser degree in mature leaves and siliques and marginally in seedling roots and bolting stems of mature plants. The catalytic efficiency was in…
Wa8730a015g005080	2.67115	0	0	0.708	0.012
Wa8730a018g000750	2.66629	3.3273e-248	4.63892e-244	0.649	0.035	AT3G55120	A11, AtCHI, CFI, CHI, TT5	Catalyzes the conversion of chalcones into flavanones. Required for the accumulation of purple anthocyanins in leaves and stems.
Wa8730a009g005630	2.65324	8.60512e-261	1.19973e-256	0.976	0.619
Wa8730a007g007620	2.54034	1.63759e-168	2.28312e-164	0.494	0.037
Wa8730a007g004260	2.48982	8.03503e-229	1.12024e-224	0.539	0.007	AT4G08910;AT1G22250;AT1G78170
Wa8730a001g004950	2.48401	3.46713e-263	4.83387e-259	0.865	0.166
Wa8730a007g000880	2.47508	4.38538e-174	6.11409e-170	0.765	0.23	AT3G53190;AT3G01270;AT3G27400;AT4G24780;AT1G67750;AT5G04310;AT5G63180;AT3G24670;AT5G48900;AT4G13710;AT1G04680		Pectin lyase-like superfamily protein;Pectate lyase family protein;Encodes a pectate lyase involved in response to nematodes.;Encodes a pectate lyase involved in response to nematodes.;Pectate lyase family protein;Pectin lyase-like superfamily protein;Pectin lyase-like superfamily protein;Pectin lyase-like superfamily protein;Pectin lyase-like superfamily protein;Pectin lyase-like superfamily pro…
Wa8730a016g002030	2.44606	5.52182e-238	7.69852e-234	0.854	0.242
Wa8730a006g004490	2.39231	3.14072e-242	4.3788e-238	0.791	0.156	AT1G24470	ATKCR2, KCR2	Encodes one of the two Arabidopsis homologues to YBR159w encoding a S. cerevisiae beta-ketoacyl reductase (KCR), which catalyzes the first reduction during VLCFA (very long chain fatty acids, >18 carbon) elongation: KCR1 (At1g67730), KCR2 (At1g24470). Complementation of the yeast ybr159Delta mutant demonstrated that the two KCR proteins are divergent and that only AtKCR1 can restore heterologous …
Wa8730a012g001190	2.36163	4.43347e-211	6.18114e-207	0.635	0.067	AT3G12203;AT1G33540;AT5G09640;AT3G52000	scpl17;scpl18;SCPL19, SNG2;scpl36	serine carboxypeptidase-like 17;serine carboxypeptidase-like 18;encodes a serine carboxypeptidase-like (SCPL) protein. Mutants accumulate sinapoylglucose instead of sinapoylcholine, and have increased levels of choline and decreased activity of the enzyme sinapoylglucose:choline sinapoyltransferase.;serine carboxypeptidase-like 36
Wa8730a009g003340	2.3172	5.16218e-200	7.19711e-196	0.719	0.148	AT3G54180;AT2G38620;AT1G09600	CDC2B, CDKB1;1;CDKB1;2	Arabidopsis homolog of yeast cdc2, a protein kinase (cyclin-dependent kinase) that plays a central role in control of the mitotic cell cycle.;Encodes a member of a plant specific family of cyclin dependent kinases.;Protein kinase superfamily protein
Wa8730a012g001710	2.27822	6.09657e-228	8.49984e-224	0.593	0.031	AT5G63790	ANAC102, NAC102	Encodes a member of the NAC family of transcription factors. ANAC102 appears to have a role in mediating response to low oxygen stress (hypoxia) in germinating seedlings.
Wa8730a008g004660	2.26151	9.75994e-115	1.36073e-110	0.282	0.002
Wa8730a008g000170	2.25942	4.07008e-137	5.6745e-133	0.352	0.009
Wa8730a016g001110	2.25427	4.00967e-205	5.59028e-201	0.778	0.182	AT1G36160	ACC1, AT-ACC1, EMB22, GK, GSD1, PAS3, SFR3	Encodes acetyl-CoA carboxylase. Mutant displays uncoordinated cell divisions which are enhanced by cytokinins. Mutant also has aberrant organization of the apical region in the embryo and abnormal root and shoot development. Essential for very long chain fatty acid elongation.
Wa8730a013g005140	2.18249	8.08568e-117	1.12731e-112	0.612	0.169
Wa8730a001g011890	2.18088	3.36774e-195	4.6953e-191	0.87	0.336	AT5G59530;AT2G44800;AT5G43450		2-oxoglutarate (2OG) and Fe(II)-dependent oxygenase superfamily protein;2-oxoglutarate (2OG) and Fe(II)-dependent oxygenase superfamily protein;encodes a protein whose sequence is similar to ACC oxidase
Wa8730a009g001620	2.18083	3.44483e-114	4.80278e-110	0.365	0.029	AT5G05270	AtCHIL, CHIL	Chalcone-flavanone isomerase family protein
Wa8730a011g004730	2.14135	1.7221e-195	2.40096e-191	0.516	0.022	AT5G57800	CER3, FLP1, WAX2, YRE	encodes a transmembrane protein with similarity to the sterol desaturase family at the N-terminus and to the short-chain dehydrogenase/reductase family at the C-terminus. Mutant analyses indicate this protein is involved in cuticle membrane and wax biosynthesis.
Wa8730a009g001590	2.14089	9.64347e-161	1.34449e-156	0.895	0.514	AT3G55500;AT5G05290;AT5G39280;AT2G37640;AT2G28950;AT2G40610;AT5G02260	ATEXP16, ATEXPA16, ATHEXP, EXP16, EXPA16;ATEXP2, ATEXPA2, ATHEXP, EXP2, EXPA2;ATEXP23, ATEXPA23, ATHEXP, EXPA23;ATEXP3, ATEXPA3, ATHEXP, EXP3;ATEXP6, ATEXPA6, ATHEXP, EXPA6;ATEXP8, ATEXPA8, ATHEXP, EXP8, EXPA8;ATEXP9, ATEXPA9, ATHEXP, EXP9, EXPA9	expansin-like protein. Naming convention from the Expansin Working Group (Kende et al, 2004. Plant Mol Bio). Involved in the formation of nematode-induced syncytia in roots of Arabidopsis thaliana.;Encodes an expansin. Naming convention from the Expansin Working Group (Kende et al, 2004. Plant Mol Bio);member of Alpha-Expansin Gene Family. Naming convention from the Expansin Working Group (Kende …
Wa8730a002g009950	2.12407	5.73259e-262	7.99238e-258	0.623	0.014	AT2G28630;AT5G04530	KCS12;KCS19	Encodes KCS12, a member of the 3-ketoacyl-CoA synthase family involved in the biosynthesis of VLCFA (very long chain fatty acids).;Encodes KCS19, a member of the 3-ketoacyl-CoA synthase family involved in the biosynthesis of VLCFA (very long chain fatty acids).
Wa8730a017g002740	2.11275	4.7337e-192	6.59972e-188	0.683	0.125	AT2G16530;AT1G72590		Encodes polyprenol reductase involved in N-gylcosylation. Mutants are defective in pollen development. Knockouts are embryo lethal;Encodes a polyphenol reductase.
Wa8730a009g002200	2.0852	1.83116e-252	2.553e-248	0.625	0.021	AT3G05020;AT5G27200	ACP, ACP1;ACP5	encodes an acyl carrier protein expressed in leaves, roots, and dry seeds. Protein is not regulated by light.;encodes an acyl carrier protein
Wa8730a015g003690	2.08192	4.77549e-248	6.65799e-244	0.64	0.03	AT3G07680	p24beta2	Encodes an Golgi-localized p24 protein. Interacts with p24delta5 at ER export sites for ER exit and coupled transport to the Golgi apparatus. The mRNA is cell-to-cell mobile.
Wa8730a003g003400	2.05886	9.02623e-231	1.25844e-226	0.556	0.012	AT4G16442		Uncharacterised protein family (UPF0497)
Wa8730a018g003530	2.04392	7.8586e-177	1.09565e-172	0.756	0.215	AT1G60810;AT1G09430	ACLA-2;ACLA-3	One of the three genes encoding subunit A of the trimeric enzyme ATP Citrate lyase;Encodes subunit A of the heteromeric enzyme ATP citrate lyase (ACL). In animals, ACL is encoded by a single gene; ACL in Arabidopsis is composed of two polypeptides, ACLA (encoded by 3 genes) and ACLB (encoded by 2 genes). The holoenzyme has an A(4)B(4)stoichiometry. Expression of both ACLA and ACLB but not of eith…
Wa8730a015g004500	2.0344	5.13799e-173	7.16339e-169	0.635	0.117	AT1G60010;AT1G10530
Wa8730a015g004980	1.99803	2.22027e-167	3.09551e-163	0.814	0.34	AT4G34135;AT2G15490;AT1G24100;AT2G23250	UGT73B2;UGT73B4;UGT74B1;UGT84B2	The At4g34135 gene encodes a flavonol 7-O-glucosyltransferase (EC 2.4.1.237) that glucosylates also with a 20 fold lower activity flavonols (kaempferol and quercetin) at the 3-O-position.;UDP-glycosyltransferase 73B4;Encodes a UDP-glucose:thiohydroximate S-glucosyltransferase, involved in glucosinolate biosynthesis;UDP-glucosyl transferase 84B2
Wa8730a011g004850	1.93616	2.94589e-231	4.10716e-227	0.557	0.012
Wa8730a008g000640	1.93136	2.80558e-255	3.91154e-251	0.577	0.003
Wa8730a020g001820	1.91641	2.75156e-182	3.83622e-178	0.913	0.569	AT1G22530	PATL2	PATELLIN 2
Wa8730a013g002970	1.90435	2.99509e-74	4.17575e-70	0.48	0.151
Wa8730a010g004870	1.90418	5.54018e-179	7.72412e-175	0.562	0.06	AT5G48230	AACT2, ACAT2, EMB1276	Encodes an acetoacetyl-CoA thiolase that generates the bulk of the acetoacetyl-CoA precursor needed for the cytosolic localized, mevalonate-derived isoprenoids biosynthetic pathway. Loss-of-function mutants are embryo lethal.
Wa8730a011g001270	1.90117	3.63266e-174	5.06466e-170	0.633	0.112	AT1G76470;AT1G65010		NAD(P)-binding Rossmann-fold superfamily protein;Putative role in flower development. Comparison of SALK_061426C to Columbia wild type in normal lighting and under low light of 33 micromoles per meter-squared per second resulted in a trend toward earlier bolting in the mutant under low light (P=0.055) (Ann Stapleton and Patrick Pridgen, 2009, personal communication).
Wa8730a010g004880	1.88637	1.49417e-164	2.08317e-160	0.84	0.397	AT5G55850;AT5G63270;AT5G40645	NOI	NOI protein;RPM1-interacting protein 4 (RIN4) family protein;RPM1-interacting protein 4 (RIN4) family protein
Wa8730a013g004710	1.85918	4.70587e-163	6.56093e-159	0.715	0.196	AT5G43360;AT2G32830;AT3G54700	ATPT4, PHT1;3, PHT3;PHT1;5, PHT5;PHT1;7	Encodes Pht1;3, a member of the Pht1 family of phosphate transporters which include: Pht1;1/At5g43350, Pht1;2/At5g43370, Pht1;3/At5g43360, Pht1;4/At2g38940, Pht1;5/At2g32830, Pht1;6/At5g43340, Pht1;7/At3g54700, Pht1;8/At1g20860, Pht1;9/At1g76430 (Plant Journal 2002, 31:341).;Encodes Pht1;5, a member of the Pht1 family of phosphate transporters which include: Pht1;1/At5g43350, Pht1;2/At5g43370, Ph…
Wa8730a007g003940	1.85053	4.80753e-102	6.70266e-98	0.331	0.026	AT5G13930	ATCHS, CHS, TT4	Encodes chalcone synthase (CHS), a key enzyme involved in the biosynthesis of flavonoids. Required for the accumulation of purple anthocyanins in leaves and stems. Also involved in the regulation of auxin transport and the modulation of root gravitropism.
Wa8730a013g005120	1.84604	4.1262e-163	5.75275e-159	0.566	0.074
Wa8730a016g001400	1.83666	2.28513e-178	3.18593e-174	0.599	0.079
Wa8730a001g010900	1.81465	4.32872e-145	6.0351e-141	0.745	0.257	AT5G16710	DHAR3	The protein undergoes thiolation following treatment with the oxidant tert-butylhydroperoxide.
Wa8730a007g009040	1.80245	9.94238e-81	1.38617e-76	0.682	0.328	AT1G35140;AT5G09440	EXL1, PHI-1;EXL4	At1g35140 (At1g35140/T32G9_32) mRNA, complete cds;EXORDIUM like 4
Wa8730a020g002780	1.80072	1.02522e-239	1.42936e-235	0.586	0.016	AT1G67730;AT1G24470	ATKCR1, KCR1, YBR159;ATKCR2, KCR2	Encodes one of the two Arabidopsis homologues to YBR159w encoding a S. cerevisiae beta-ketoacyl reductase (KCR), which catalyzes the first reduction during VLCFA (very long chain fatty acids, >18 carbon) elongation: KCR1 (At1g67730), KCR2 (At1g24470). Complementation of the yeast ybr159Delta mutant demonstrated that the two KCR proteins are divergent and that only AtKCR1 can restore heterologous …
Wa8730a006g002600	1.79897	4.55769e-188	6.35433e-184	0.44	0.002	AT1G79460	ATKS, ATKS1, GA2, KS, KS1	Encodes for a protein with ent-kaurene synthase B activity which catalyzes the second step in the cyclization of GGPP to ent-kaurene in the gibberellins biosynthetic pathway.
Wa8730a009g000590	1.7751	2.75272e-153	3.83785e-149	0.761	0.27	AT2G38050;AT3G55360	ATDET2, DET2, DWF6;ATTSC13, CER10, ECR, TSC13	Similar to mammalian steroid-5-alpha-reductase. Involved in the brassinolide biosynthetic pathway.;Enoyl-CoA reductase is involved in all very long chain fatty acids (VLCFA) elongation reactions that are required for cuticular wax, storage lipid and sphingolipid metabolism. The protein is located in the ER, but in contrast to its yeast homolog TSC13 is not particularly enriched in the nuclear env…
Wa8730a016g000410	1.76341	1.97618e-182	2.75518e-178	0.433	0.003
Wa8730a006g004320	1.76063	1.49213e-140	2.08033e-136	0.734	0.263	AT2G41480;AT5G64120;AT1G14540;AT5G66390;AT2G34060;AT5G15180;AT5G39580;AT3G03670;AT1G49570	AtPRX25, PRX25;AtPRX71, PRX71;PER4;PRX72	Encodes a cationic cell-wall-bound peroxidase homolog that is involved in the lignification of cell walls.;encodes a cell wall bound peroxidase that is induced by hypo-osmolarity;Peroxidase superfamily protein;Encodes a peroxidase that is involved in lignin biosynthesis.;Peroxidase superfamily protein;Peroxidase superfamily protein;Peroxidase superfamily protein;Peroxidase superfamily protein;Per…
Wa8730a017g002730	1.75858	2.5585e-162	3.56705e-158	0.913	0.647	AT1G75600;AT1G13370		Histone superfamily protein;Histone superfamily protein
Wa8730a008g002540	1.72194	1.88491e-200	2.62795e-196	0.589	0.05	AT5G10480	PAS2, PEP	Protein tyrosine phosphatase-like involved in cell division and differentiation. Interacts with CDKA;1 only in its phosphorylated form, preventing dephosphorylation. Overexpression slowed down cell division in suspension cell cultures at the G2-to-M transition and early mitosis and inhibited Arabidopsis seedling growth. Localized in the cytoplasm of dividing cells but moved into the nucleus upon …
Wa8730a007g003870	1.71479	5.57532e-177	7.77311e-173	0.463	0.017	AT5G13400		Major facilitator superfamily protein
Wa8730a012g005240	1.7125	1.694e-178	2.36178e-174	0.48	0.021	AT3G28910;AT1G74650;AT4G12350;AT1G08810;AT3G47600	ATMYB30, MYB30;ATMYB31, ATY13, MYB31;AtMYB42, MYB42;AtMYB60, MYB60;ATMYB94, ATMYBCP70, MYB94	transcription factor myb homologue;Member of the R2R3 factor gene family.;Encodes a putative transcription factor (MYB42).;putative transcription factor of the R2R3-MYB gene family. Transcript increases under conditions that promote stomatal opening (white and blue light, abi1-1 mutation) and decreases under conditions that trigger stomatal closure (ABA, desiccation, darkness), with the exception…
Wa8730a009g005650	1.68925	9.54663e-117	1.33099e-112	0.732	0.313	AT1G27350		Ribosome associated membrane protein RAMP4
Wa8730a004g004850	1.68694	4.13487e-127	5.76483e-123	0.774	0.356	AT3G21690;AT1G61890;AT4G21910;AT1G11670		MATE efflux family protein;MATE efflux family protein;MATE efflux family protein;MATE efflux family protein
Wa8730a008g004080	1.63172	2.14638e-139	2.99249e-135	0.639	0.164	AT1G11840	ATGLX1, GLX1	Encodes a glyoxalase I homolog ATGLX1.
Wa8730a007g008940	1.60458	8.72461e-165	1.21639e-160	0.681	0.145
Wa8730a007g006660	1.58233	1.36556e-117	1.90386e-113	0.564	0.135	AT1G21680		DPP6 N-terminal domain-like protein
Wa8730a013g003830	1.55834	7.25013e-91	1.01081e-86	0.61	0.212
Wa8730a009g004750	1.51298	1.48692e-138	2.07306e-134	0.622	0.142
Wa8730a007g005460	1.50076	4.37509e-145	6.09975e-141	0.911	0.391
Wa8730a019g003750	1.49846	3.06844e-144	4.27802e-140	0.544	0.086	AT5G02400;AT3G09400;AT2G46920;AT3G17090	PLL2;PLL3;POL;	Encodes a protein with similarity to the POL locus which is a novel protein phosphatase 2C. Ubiquitously expressed. No phenotype observed in homozygous null mutant background.;Similar to POLTERGEIST (POL) protein phosphatase 2C. No phenotype observed in plants homozygous for a null allele. Ubiquitously expressed.;Pol mutations are recessive, partial suppressors of meristem defects in strong clv1 …
Wa8730a001g012110	1.47457	1.00408e-137	1.39988e-133	0.351	0.006	AT3G54040		PAR1 protein
Wa8730a008g004200	1.46027	1.45082e-128	2.02274e-124	0.317	0.003	AT3G20395;AT1G12760;AT1G63170		RING/U-box superfamily protein;Zinc finger, C3HC4 type (RING finger) family protein;Zinc finger, C3HC4 type (RING finger) family protein
Wa8730a016g000330	1.44811	3.75796e-64	5.23935e-60	0.593	0.282	AT3G47710;AT1G26945	BHLH161, BNQ3;KDR, PRE6	BNQ3 belongs to a family of atypical non-DNA binding basic helix-loop-helix (bHLH) proteins that heterodimerize with and negatively regulate bHLH transcription factors. Directly and negatively regulated by AP3 and PI in petals. Required for appropriate regulation of flowering time.May also have a role in regulating light responses.;Encodes a basic helix-loop-helix (bHLH) protein involved in blue/…
Wa8730a020g002800	1.43828	1.81321e-184	2.52798e-180	0.45	0.006	AT1G67730;AT1G24470;AT5G65205	ATKCR1, KCR1, YBR159;ATKCR2, KCR2;	Encodes one of the two Arabidopsis homologues to YBR159w encoding a S. cerevisiae beta-ketoacyl reductase (KCR), which catalyzes the first reduction during VLCFA (very long chain fatty acids, >18 carbon) elongation: KCR1 (At1g67730), KCR2 (At1g24470). Complementation of the yeast ybr159Delta mutant demonstrated that the two KCR proteins are divergent and that only AtKCR1 can restore heterologous …
Wa8730a003g000920	1.43792	1.05855e-96	1.47584e-92	0.583	0.18
Wa8730a011g004700	1.41693	1.0343e-56	1.44202e-52	0.155	0.004	AT5G57800	CER3, FLP1, WAX2, YRE	encodes a transmembrane protein with similarity to the sterol desaturase family at the N-terminus and to the short-chain dehydrogenase/reductase family at the C-terminus. Mutant analyses indicate this protein is involved in cuticle membrane and wax biosynthesis.
Wa8730a010g002100	1.40006	3.10413e-98	4.32778e-94	0.592	0.19	AT2G43050;AT5G53370;AT3G06830	ATPMEPCRD;ATPMEPCRF, PMEPCRF;	Plant invertase/pectin methylesterase inhibitor superfamily;pectin methylesterase PCR fragment F;Plant invertase/pectin methylesterase inhibitor superfamily
Wa8730a003g006990	1.37667	1.87329e-179	2.61175e-175	0.527	0.037	AT1G68530;AT2G26250;AT1G04220;AT1G19440	CER6, CUT1, G2, KCS6, POP1;FDH, KCS10;KCS2;KCS4	Encodes KCS6, a member of the 3-ketoacyl-CoA synthase family involved in the biosynthesis of VLCFA (very long chain fatty acids).;epidermis-specific, encodes KCS10, a putative 3-ketoacyl-CoA synthase. probably involved in the synthesis of long-chain lipids found in the cuticle.;Encodes KCS2, a member of the 3-ketoacyl-CoA synthase family involved in the biosynthesis of VLCFA (very long chain fatt…
Wa8730a019g003490	1.37466	2.73042e-133	3.80675e-129	0.513	0.079	AT4G01900	GLB1, PII	encodes a PII protein that may function as part of a signal transduction network involved in perceiving the status of carbon and organic nitrogen. Forms a protein complex with N-acetylglutamate kinase and regulates the kinase activity by relieving the feedback inhibition of the kinase by arginine. Regulates acetyl-CoA carboxylase activity.
Wa8730a008g003960	1.34551	7.87943e-65	1.09855e-60	0.739	0.403
Wa8730a013g002080	1.33669	2.87587e-111	4.00953e-107	0.457	0.075	AT4G11820	FKP1, HMGS, MVA1	Encodes a protein with hydroxymethylglutaryl-CoA synthase activity which was characterized by phenotypical complementation of the S. cerevisiae mutant.
Wa8730a010g004620	1.31398	9.45696e-91	1.31849e-86	0.61	0.212	AT1G59640;AT5G62610;AT2G42300;AT1G10120	BPE, BPEp, BPEub, ZCW32	A basic helix-loop-helix encoding gene (BIGPETAL, BPE) involved in the control of petal size. BPE is expressed via two mRNAs derived from an alternative splicing event. The BPEub (AT1G59640.1)transcript is expressed ubiquitously, whereas the BPEp (AT1G59640.2) transcript is preferentially expressed in petals. Plants that lack the petal-expressed variant BPEp have larger petals as a result of incr…
Wa8730a015g001170	1.30328	5.05059e-149	7.04153e-145	0.375	0.007	AT1G16060;AT1G79700	ADAP, WRI3;WRI4	Encodes ADAP, an AP2-domain protein that interacts with ARIA. ADAP is a positive regulator of the ABA response and is also involved in regulating seedling growth.;WRI4 encodes an AP2/ERF-type transcriptional activator that specifically controls cuticular wax biosynthesis in Arabidopsis stems. It also functions to activate transcription of genes involved fatty acid biosynthesis during seed and flo…
Wa8730a009g002590	1.2559	8.94569e-83	1.24721e-78	0.665	0.271	AT3G16770;AT2G47520;AT3G23220;AT1G53910	ATEBP, EBP, ERF72, RAP2.3;AtERF71, ERF71, HRE2;ESE1;RAP2.12	Encodes a member of the ERF (ethylene response factor) subfamily B-2 of the plant specific ERF/AP2 transcription factor family (RAP2.3). The protein contains one AP2 domain. There are 5 members in this subfamily including RAP2.2 AND RAP2.12.It is localized to the nucleus and acts as a transcriptional activator through the GCC-box. It has been identified as a suppressor of Bax-induced cell death b…
Wa8730a005g005530	1.25222	3.31246e-166	4.61823e-162	0.393	0.001	AT3G49190		O-acyltransferase (WSD1-like) family protein
Wa8730a008g003940	1.25173	3.47981e-53	4.85155e-49	0.953	0.843
Wa8730a014g006080	1.23343	4.38415e-91	6.11238e-87	0.582	0.204
Wa8730a002g007490	1.19986	3.23652e-67	4.51236e-63	0.534	0.204	AT2G38040	CAC3	encodes the carboxyltransferase alpha subunit of acetyl-CoA carboxylase, involved in de novo fatty acid biosynthesis
Wa8730a007g002140	1.17854	2.19843e-32	3.06506e-28	0.239	0.073	AT5G48500
Wa8730a001g004070	1.16793	1.57309e-104	2.1932e-100	0.357	0.035	AT2G32460;AT3G62610;AT5G49330;AT2G47460;AT3G23250;AT4G28110;AT5G54230;AT3G13540;AT1G56160;AT5G56110;AT4G26930	ATM1, ATMYB101, MYB101;ATMYB11, MYB11, PFG2;ATMYB111, MYB111, PFG3;ATMYB12, MYB12, PFG1;ATMYB15, ATY19, MYB15;AtMYB41, MYB41;AtMYB49, MYB49;ATMYB5, MYB5;ATMYB72, MYB72;ATMYB80, AtMYB103, MS188, MYB103, MYB80;AtMYB97, MYB97	Member of the R2R3 factor gene family.;Member of the R2R3 factor gene family.;Member of the R2R3 factor gene family.;MYB12 belongs to subgroup 7 of the R2R3-MYB family. It strongly activates the promoters of chalcone synthase (CHS), flavanone 3-hydroxylase (F3H), flavonol synthase (FLS) and - to a lesser extent - chalcone flavanone isomerase (CHI), but cannot activate the promoters of flavonoid-3…
Wa8730a006g007440	1.16656	3.29113e-129	4.58849e-125	0.951	0.818	AT1G72360;AT1G53910;AT3G14230	AtERF73, ERF73, HRE1;RAP2.12;RAP2.2	encodes a member of the ERF (ethylene response factor) subfamily B-2 of ERF/AP2 transcription factor family. The protein contains one AP2 domain. There are 5 members in this subfamily including RAP2.2 AND RAP2.12.;encodes a member of the ERF (ethylene response factor) subfamily B-2 of ERF/AP2 transcription factor family (RAP2.12). The protein contains one AP2 domain. There are 5 members in this s…
Wa8730a001g008130	1.14473	1.27141e-41	1.77261e-37	0.625	0.381	AT5G11070
Wa8730a007g006900	1.14307	2.49784e-83	3.48249e-79	0.585	0.203	AT4G34240;AT1G44170	ALDH3, ALDH3I1;ALDH3H1, ALDH4	Aldehyde dehydrogenase induced by ABA and dehydration;Encodes a protein similar to the aldehyde dehydrogenase cp-ADH from C.plantagineum. Constitutively expressed at low levels.
Wa8730a011g004580	1.11487	3.0331e-72	4.22874e-68	0.188	0.003	AT5G57800	CER3, FLP1, WAX2, YRE	encodes a transmembrane protein with similarity to the sterol desaturase family at the N-terminus and to the short-chain dehydrogenase/reductase family at the C-terminus. Mutant analyses indicate this protein is involved in cuticle membrane and wax biosynthesis.
Wa8730a012g004760	1.1049	1.5094e-125	2.10441e-121	0.378	0.024	AT5G26340;AT1G77210;AT1G50310;AT1G34580	ATSTP13, MSS1, STP13;AtSTP14, STP14;ATSTP9, STP9;	Encodes a protein with high affinity, hexose-specific/H+ symporter activity. The activity of the transporter appears to be negatively regulated by phosphorylation. Importantly, microarray analysis, as well as the study of the expression of this gene in mutants involved in programmed cell death (PCD) demonstrated a tight correlation between this gene's expression and PCD.;AtSTP14 belongs to the fa…
Wa8730a007g002540	1.09504	1.53765e-81	2.1438e-77	0.852	0.62	AT3G23820;AT2G47650	GAE6;UXS4	UDP-D-glucuronate 4-epimerase;encodes a protein similar to UDP-glucuronic acid decarboxylase. UDP-glucuronic acid decarboxylase produces UDP-xylose, which is a substrate for many cell wall carbohydrates including hemicellulose and pectin. UDP-xylose is also known to feedback regulate several cell wall biosynthetic enzymes.
Wa8730a006g002880	1.09413	1.2461e-109	1.73731e-105	0.312	0.014	AT3G25400
Wa8730a004g005840	1.07908	6.47369e-85	9.02561e-81	0.332	0.044	AT4G37540;AT1G67100;AT1G68510	LBD39;LBD40;LBD42	LOB domain-containing protein 39;LOB domain-containing protein 40;LOB domain-containing protein 42
Wa8730a008g005930	1.02997	2.33219e-119	3.25153e-115	0.292	0.002	AT4G21380;AT4G28350;AT1G50610;AT4G03230;AT1G61610;AT4G27290;AT1G11300	ARK3, RK3;LecRK-VII.2;PRK5	encodes a putative receptor-like serine/threonine protein kinases that is similar to Brassica self-incompatibility (S) locus. Expressed in root. Shoot expression limited to limited to the root-hypocotyl transition zone and at the base of lateral roots as well as in axillary buds, and pedicels.;Concanavalin A-like lectin protein kinase family protein;Leucine-rich repeat protein kinase family prote…
Wa8730a003g005030	1.02626	1.726e-124	2.40639e-120	0.378	0.024	AT5G62630;AT1G74790	HIPL2;	hipl2 protein precursor;catalytics
Wa8730a019g002640	1.01875	1.3806e-72	1.92484e-68	0.732	0.36	AT5G19140	AILP1, ATAILP1	Aluminium induced protein with YGL and LRDR motifs
Wa8730a002g008940	1.00672	3.74092e-100	5.21559e-96	0.971	0.881	AT4G01470;AT5G47450;AT1G17810;AT4G17340;AT2G36830;AT1G31885	ATTIP1.3, GAMMA-TIP3, TIP1;3;ATTIP2;3, DELTA-TIP3, TIP2;3;BETA-TIP;DELTA-TIP2, TIP2;2;GAMMA-TIP, GAMMA-TIP1, TIP1;1;NIP3;1	Encodes AtTIP1;3, functions as water and urea channels in pollen.;Tonoplast intrinsic protein, transports ammonium (NH3) and methylammonium across the tonoplast membrane, gene expression shows diurnal regulation and is upregulated by ammonium (NH3).;beta-tonoplast intrinsic protein (beta-TIP) mRNA, complete;tonoplast intrinsic protein 2;2;Encodes a tonoplast intrinsic protein, which functions as …
Wa8730a011g002460	1.00302	3.31918e-112	4.6276e-108	0.358	0.028	AT5G61320;AT1G64950;AT3G03470;AT2G12190	CYP89A3;CYP89A5;CYP89A9;	member of CYP89A;member of CYP89A;member of CYP89A;Cytochrome P450 superfamily protein
Wa8730a005g004920	3.3973	2.26388e-193	3.15631e-189	0.48	0.012
Wa8730a012g004550	2.84055	1.08471e-270	1.5123e-266	0.96	0.553	AT4G24380;AT5G65400		;alpha/beta-Hydrolases superfamily protein
Wa8730a017g004030	2.61971	1.84968e-277	2.57883e-273	0.997	0.76
Wa8730a004g004080	2.34812	6.40699e-217	8.93263e-213	0.65	0.073	AT1G16500;AT1G79160
Wa8730a008g003780	2.33291	5.03183e-215	7.01537e-211	0.894	0.34	AT4G19690;AT3G12750;AT2G30080;AT1G31260;AT2G32270;AT1G05300;AT2G04032	ATIRT1, IRT1;AtZIP1, ZIP1;ATZIP6, ZIP6;ZIP10;ZIP3;ZIP5;ZIP7	Fe(II) transport protein (IRT1);A member of Zrt- and Irt-related protein (ZIP) family. transcript is induced in response to zinc deficiency in the root.;member of Fe(II) transporter isolog family. Gene expression is not regulated by iron, copper, or zinc deficiency or excess.;member of Fe(II) transporter isolog family;A member of Zrt- and Irt-related protein (ZIP) family. transcript is induced in…
Wa8730a011g005590	2.23579	9.168e-162	1.2782e-157	0.798	0.315	AT5G57800	CER3, FLP1, WAX2, YRE	encodes a transmembrane protein with similarity to the sterol desaturase family at the N-terminus and to the short-chain dehydrogenase/reductase family at the C-terminus. Mutant analyses indicate this protein is involved in cuticle membrane and wax biosynthesis.
Wa8730a001g003580	2.17526	6.43602e-181	8.9731e-177	0.781	0.233	AT3G62700;AT2G47800;AT1G71330	ABCC14, ATMRP10, MRP10;ABCC4, ATMRP4, EST3, MRP4;ATNAP5, NAP5	member of MRP subfamily;Encodes a plasma membrane localized ATPase transporter involved in multidrug transport. The expression of this gene is upregulated by herbicide safeners such as benoxacor, fluxofenim and fenclorim.;member of NAP subfamily
Wa8730a020g003070	2.06325	4.50155e-126	6.27606e-122	0.585	0.144	AT3G26690;AT1G12880	ATNUDT13, ATNUDX13, NUDX13;NUDT12, atnudt12	Encodes AtNUDT13, a mitochondrial Nudix hydrolase specific for long-chain diadenosine polyphosphates.;nudix hydrolase homolog 12
Wa8730a019g001460	2.0283	7.69447e-199	1.07276e-194	0.944	0.574	AT2G30490;AT2G40890	ATC4H, C4H, CYP73A5, REF3;CYP98A3	Encodes a cinnamate-4-hydroxylase. Mutations in this gene impact phenylpropanoid metabolism, growth and development.;encodes coumarate 3-hydroxylase (C3H), a P450-dependent monooxygenase. Involved in lignin biosynthesis and flavonoid biosynthesis. Also affects the biosynthesis of coumarins such as scopoletin and scopolin as a branching-out-pathway from the phenylpropanoid acid level.
Wa8730a001g009230	2.02596	5.81508e-126	8.10738e-122	0.381	0.025	AT1G50520;AT4G12330;AT5G48000;AT1G13090	CYP705A27;CYP706A7;CYP708, CYP708A2, THAH, THAH1;CYP71B28	member of CYP705A;member of CYP706A;Encodes a member of the CYP708A family of cytochrome P450 enzymes. THAH appears to add a hydroxyl group to the triterpene thalianol. thah1 mutants have an elevated accumulation of thalianol. thah1-1 mutants have longer roots than wild type plants. Thalian-diol and desaturated thalian-diol are lost from the root extracts of thah1-1 mutants. Overexpression of the…
Wa8730a002g007630	2.01529	1.21308e-172	1.69128e-168	0.827	0.366	AT5G38630	ACYB-1, CYB-1	Encodes for cytochrome b561.
Wa8730a009g001850	1.99269	3.57402e-132	4.98289e-128	0.741	0.309	AT5G62920;AT1G19050;AT2G41310;AT3G57040	ARR6;ARR7;ARR8, ATRR3, RR3;ARR9, ATRR4	Encodes a Type-A response regulator that is responsive to cytokinin treatment. Its C-ter domain is very short in comparison to other Arabidopsis ARRs (17 total). Arr6 protein is stabilized by cytokinin.;Encodes a member of the Arabidopsis response regulator (ARR) family, most closely related to ARR15. A two-component response regulator protein containing a phosphate accepting domain in the receiv…
Wa8730a014g005310	1.926	5.10943e-106	7.12356e-102	0.59	0.177	AT5G24530;AT4G16770;AT4G10490;AT4G25310	DMR6	Encodes a putative 2OG-Fe(II) oxygenase that is defense-associated but required for susceptibility to downy mildew.;2-oxoglutarate (2OG) and Fe(II)-dependent oxygenase superfamily protein;2-oxoglutarate (2OG) and Fe(II)-dependent oxygenase superfamily protein;2-oxoglutarate (2OG) and Fe(II)-dependent oxygenase superfamily protein
Wa8730a015g005880	1.90492	1.28851e-121	1.79644e-117	0.656	0.215	AT2G24150	HHP3	heptahelical transmembrane protein HHP3
Wa8730a005g003460	1.87863	9.07149e-182	1.26475e-177	0.433	0.003	AT5G25610	ATRD22, RD22	responsive to dehydration 22 (RD22) mediated by ABA
Wa8730a008g000260	1.85593	6.25912e-139	8.72647e-135	0.415	0.029	AT3G63240		DNAse I-like superfamily protein
Wa8730a018g002220	1.7574	2.21686e-131	3.09075e-127	0.799	0.387	AT2G47485
Wa8730a006g002290	1.7373	1.93225e-129	2.69395e-125	0.61	0.164	AT5G53560;AT5G48810	ATB5-A, ATCB5-E, B5, CB5-E;ATB5-B, ATCB5-D, B5, CB5-D, CYTB5-B	Encodes a cytochrome b5 isoform that can be reduced by AtCBR, a cytochrome b5 reductase.;Encodes a cytochrome b5 isoform that localizes to the ER. The C-terminal portion of the protein appears to be capable of inserting into a plant microsomal membrane in vitro and the protein appears to be subject to glycosylation.
Wa8730a004g004930	1.71876	8.22164e-196	1.14626e-191	0.494	0.014	AT2G20835
Wa8730a009g001630	1.71104	4.78588e-123	6.67248e-119	0.663	0.215	AT3G21090;AT2G29940;AT5G13580	ABCG15;ABCG31, ATPDR3, PDR3;ABCG6	ABC-2 type transporter family protein;pleiotropic drug resistance 3;Belongs to a clade of five Arabidopsis thaliana ABCG half-transporters that are required for synthesis of an effective suberin barrier in roots and seed coats (ABCG2, ABCG6, and ABCG20) and for synthesis of an intact pollen wall (ABCG1 and ABCG16).
Wa8730a010g004190	1.71	1.47053e-127	2.05021e-123	0.341	0.01	AT1G67980;AT4G26220	CCOAMT;CCoAOMT7	Encodes S-adenosyl-L-methionine: transcaffeoyl Coenzyme A 3-O-methyltransferase.;Encodes a caffeoyl-coenzyme A O-methyltransferase (CCoAOMT)-like protein with a strong preference for methylating the para position of flavanones and dihydroflavonols, whereas flavones and flavonols are methylated in the meta-position.
Wa8730a003g005690	1.69893	1.95874e-112	2.73088e-108	0.686	0.268	AT3G19320;AT1G49750;AT4G06744;AT1G25320		Leucine-rich repeat (LRR) family protein;Leucine-rich repeat (LRR) family protein;Leucine-rich repeat (LRR) family protein;Leucine-rich repeat protein kinase family protein
Wa8730a011g000310	1.68963	1.5355e-158	2.1408e-154	0.636	0.128	AT2G35740;AT3G03090;AT5G17010	ATINT3, INT3;AtVGT1, VGT1;	nositol transporter 3;Encodes a vacuolar membrane-localized glucose transporter that can also transport fructose. Mutations in these gene have effects on seed germination and time to flowering.;Major facilitator superfamily protein
Wa8730a019g001770	1.67628	6.10681e-140	8.51411e-136	0.883	0.463
Wa8730a006g004420	1.64579	3.87385e-98	5.40092e-94	0.467	0.099	AT2G43590		Chitinase family protein
Wa8730a001g003240	1.64034	5.57904e-144	7.77829e-140	0.486	0.055	AT1G23330		alpha/beta-Hydrolases superfamily protein
Wa8730a011g001670	1.61907	7.09916e-144	9.89764e-140	0.546	0.079	AT1G32450;AT5G19640;AT1G22540	AtNPF7.3, NPF7.3, NRT1.5	Transmembrane nitrate transporter. Involved in xylem transport of nitrate from root to shoot. Induced in response to nitrate. Not involved in nitrate uptake. expressed in root pericycle cells.;Major facilitator superfamily protein;Major facilitator superfamily protein
Wa8730a013g001050	1.58703	2.50808e-196	3.49677e-192	0.463	0.003	AT1G01580;AT5G23990	ATFRO2, FRD1, FRO2;ATFRO5, FRO5	Encodes the low-iron-inducible ferric chelate reductase responsible for reduction of iron at the root surface. It is likely to be the major Fe(III) chelate reductase in Arabidopsis iron metabolism. Coordinately regulated with IRT1, the major transporter responsible for high-affinity iron uptake from the soil, at both transcriptional and posttranscriptional levels. Steady state mRNA levels are reg…
Wa8730a003g003050	1.57285	3.52317e-128	4.912e-124	0.635	0.181	AT5G39220;AT1G13820		alpha/beta-Hydrolases superfamily protein;alpha/beta-Hydrolases superfamily protein
Wa8730a005g000060	1.56788	4.42474e-108	6.16897e-104	0.723	0.332	AT2G25490;AT5G25350	EBF1, FBL6;EBF2	Encodes an F-box protein involved in the ubiquitin/proteasome-dependent proteolysis of EIN3.;Arabidopsis thaliana EIN3-binding F-box protein 2 (EBF2) mRNA. Part of the SCF complex, it is located in the nucleus and is involved in the ethylene-response pathway.
Wa8730a005g000640	1.56092	5.50388e-130	7.67351e-126	0.615	0.156
Wa8730a003g006530	1.55823	2.1432e-135	2.98804e-131	0.83	0.436	AT2G21970	SEP2	stress enhanced protein 2 (SEP2) chlorophyll a/b-binding protein
Wa8730a001g004310	1.52331	5.90763e-97	8.23641e-93	0.639	0.244	AT5G04950;AT5G56080;AT1G09240;AT1G56430	ATNAS1, NAS1;ATNAS2, NAS2;ATNAS3, NAS3;ATNAS4, NAS4	Encodes a nicotianamide synthase.;Encodes a protein with nicotianamine synthase activity. Its transcript levels rise in roots in response to zinc deficiency and rise in leaves in response to elevated levels of zinc.;Encodes a nicotianamine synthase.;Encodes a protein with nicotianamine synthase activity.
Wa8730a001g006300	1.51799	5.15169e-128	7.18249e-124	0.55	0.112	AT5G01700		Protein phosphatase 2C family protein
Wa8730a012g000420	1.49488	7.93529e-154	1.10634e-149	0.489	0.044	AT2G36090		F-box family protein
Wa8730a003g002320	1.49313	7.06227e-118	9.84621e-114	0.62	0.182	AT4G37470	KAI2	HTL belonging to the alpha/beta fold hydrolase superfamily. Mutant and over-expression studies indicates its involvement in seedling de-etiolation process.
Wa8730a005g001370	1.44293	1.48278e-105	2.06729e-101	0.491	0.105	AT2G28305;AT5G26140;AT2G37210;AT3G53450;AT5G03270;AT5G11950	ATLOG1, LOG1;ATLOG9, LOG9;LOG3;LOG4;LOG6;LOG8	Putative lysine decarboxylase family protein;Putative lysine decarboxylase family protein;Encodes a protein of unknown function. It has been crystallized and shown to be structurally almost identical to the protein encoded by At5g11950.;Putative lysine decarboxylase family protein;lysine decarboxylase family protein;Encodes a protein of unknown function. It has been crystallized and shown to be s…
Wa8730a020g001730	1.43943	2.65949e-102	3.70786e-98	0.831	0.469	AT2G31560;AT2G43340		Protein of unknown function (DUF1685);Protein of unknown function (DUF1685)
Wa8730a009g002910	1.41684	6.46745e-125	9.01692e-121	0.387	0.031	AT1G19190		alpha/beta-Hydrolases superfamily protein
Wa8730a005g003150	1.406	4.71814e-138	6.57803e-134	0.507	0.073	AT4G35950;AT4G28950	ARAC6, ATRAC6, ATROP5, RAC2, RAC6, ROP5;ARAC7, ATRAC7, ATROP9, RAC7, ROP9	A member of ROP GTPases gene family-like. GTP binding protein Arac6.;A member of ROP GTPase gene family.
Wa8730a007g002730	1.38697	3.63227e-105	5.06411e-101	0.718	0.292
Wa8730a015g001450	1.37953	3.68665e-107	5.13992e-103	0.787	0.463	AT3G21150;AT2G24790;AT5G24930;AT5G57660	AtBBX32, BBX32, EIP6;ATCOL3, BBX4, COL3;ATCOL4, BBX5, COL4;ATCOL5, BBX6, COL5	Encodes a protein with a B-box domain predicted to act as a transcription factor. Expression of the BBX32 gene is affected by monochromatic red light.;Positive regulator of photomorphogenesis that acts downstream of COP1 but can promote lateral root development independently of COP1 and also function as a daylength-sensitive regulator of shoot branching.;CONSTANS-like 4;CONSTANS-like 5
Wa8730a002g010030	1.3669	7.42036e-97	1.03455e-92	0.802	0.481	AT3G07090		PPPDE putative thiol peptidase family protein
Wa8730a007g008930	1.33797	2.73548e-75	3.81381e-71	0.719	0.405	AT2G27820;AT3G44720;AT5G22630;AT1G08250	ADT3, PD1;ADT4;ADT5;ADT6, AtADT6	Encodes a plastid-localized arogenate dehydratase involved in phenylalanine biosynthesis. Not less than six genes encoding ADT were identi&#64257;ed in the Arabidopsis genome: ADT1 [At1g11790]; ADT2 [At3g07630]; ADT3 [At2g27820]; ADT4 [At3g44720]; ADT5 [At5g22630]; and ADT6 [At1g08250].;Encodes a plastid-localized arogenate dehydratase involved in phenylalanine biosynthesis. Not less than six gen…
Wa8730a010g003830	1.33183	5.04942e-91	7.03991e-87	0.795	0.465
Wa8730a002g002980	1.31741	1.45843e-138	2.03335e-134	0.405	0.024	AT4G12390;AT1G23205;AT3G47380;AT1G62770;AT4G25260;AT5G62360	PME1	pectin methylesterase inhibitor 1;Plant invertase/pectin methylesterase inhibitor superfamily protein;Plant invertase/pectin methylesterase inhibitor superfamily protein;Plant invertase/pectin methylesterase inhibitor superfamily protein;Plant invertase/pectin methylesterase inhibitor superfamily protein;Plant invertase/pectin methylesterase inhibitor superfamily protein
Wa8730a012g004190	1.31616	8.44567e-104	1.1775e-99	0.845	0.513	AT1G14870;AT1G68610;AT1G49030	AtPCR2, PCR2;PCR11;	PCR2 encodes a membrane protein involved in zinc transport and detoxification.;Target promoter of the male germline-specific transcription factor DUO1.;PLAC8 family protein
Wa8730a015g002730	1.3094	2.65255e-86	3.69819e-82	0.6	0.218	AT2G42280	AKS3, FBH4	basic helix-loop-helix (bHLH) DNA-binding superfamily protein
Wa8730a001g010050	1.30384	4.81538e-132	6.7136e-128	0.42	0.036	AT1G80050;AT4G22570;AT4G12440	APT2, ATAPT2, PHT1.1;APT3;APT4	Encodes an adenosine phosphoribosyl transferase(E.C:2.4.2.7), a constitutively expressed enzyme involved in the one-step salvage of adenine to AMP. This isozyme has high affinity for cytokinins and is likely to be localized to the cytosol.;Encodes an adenine phosphoribosyltransferase (APT; EC 2.4.2.7), which is a constitutively expressed enzyme involved in the one-step salvage of adenine to AMP. …
Wa8730a010g004180	1.30309	3.1949e-95	4.45433e-91	0.269	0.012	AT1G67980;AT4G26220	CCOAMT;CCoAOMT7	Encodes S-adenosyl-L-methionine: transcaffeoyl Coenzyme A 3-O-methyltransferase.;Encodes a caffeoyl-coenzyme A O-methyltransferase (CCoAOMT)-like protein with a strong preference for methylating the para position of flavanones and dihydroflavonols, whereas flavones and flavonols are methylated in the meta-position.
Wa8730a010g004460	1.29578	7.89311e-52	1.10046e-47	0.572	0.284	AT5G42380;AT1G76650	CML37;CML38	calmodulin like 37;calmodulin-like 38
Wa8730a011g000300	1.28827	2.21081e-92	3.0823e-88	0.63	0.231
Wa8730a004g005080	1.27364	6.08693e-66	8.4864e-62	0.572	0.228	AT4G05070		Wound-responsive family protein
Wa8730a013g006060	1.27207	1.2802e-100	1.78485e-96	0.582	0.175	AT2G28450;AT3G09760		zinc finger (CCCH-type) family protein;RING/U-box superfamily protein
Wa8730a002g004910	1.26188	9.41104e-90	1.31209e-85	0.597	0.208	AT2G28305;AT4G35190;AT5G03270;AT5G06300	ATLOG1, LOG1;LOG5;LOG6;LOG7	Putative lysine decarboxylase family protein;Putative lysine decarboxylase family protein;lysine decarboxylase family protein;Putative lysine decarboxylase family protein
Wa8730a001g000970	1.26163	3.39536e-102	4.73381e-98	0.433	0.074	AT3G06650;AT5G49460	ACLB-1;ACLB-2	One of the two genes encoding subunit B of the trimeric enzyme ATP Citrate lyase;One of the two genes encoding subunit B of the cytosolic enzyme ATP Citrate Lyase (ACL)
Wa8730a012g002940	1.24989	2.55329e-88	3.5598e-84	0.536	0.165
Wa8730a016g000060	1.23067	4.66523e-122	6.50426e-118	0.307	0.004	AT1G69560;AT3G29020;AT1G26780;AT5G39700	ATMYB105, LOF2, MYB105;AtMYB110, MYB110;AtMYB117, LOF1, MYB117;AtMYB89, MYB89	Encodes LOF2 (LATERAL ORGAN FUSION2), a MYB-domain transcription factor expressed in organ boundaries. Functions in boundary specification, meristem initiation and maintenance, and organ patterning. Also see LOF1 (At1g26780).;Encodes a putative transcription factor (MYB110).;Encodes LOF1 (LATERAL ORGAN FUSION1), a MYB-domain transcription factor expressed in organ boundaries. Functions in boundar…
Wa8730a015g004640	1.21025	2.49407e-65	3.47723e-61	0.599	0.259	AT3G48180;AT1G24405		;
Wa8730a019g000710	1.20412	3.15293e-47	4.39581e-43	0.546	0.271	AT3G55150;AT2G39380;AT3G09520;AT1G07725;AT5G59730;AT2G28650	ATEXO70H1, EXO70H1;ATEXO70H2, EXO70H2;ATEXO70H4, EXO70H4;ATEXO70H6, EXO70H6;ATEXO70H7, EXO70H7;ATEXO70H8, EXO70H8	A member of EXO70 gene family, putative exocyst subunits, conserved in land plants. Arabidopsis thaliana contains 23 putative EXO70 genes, which can be classified into eight clusters on the phylogenetic tree.;A member of EXO70 gene family, putative exocyst subunits, conserved in land plants. Arabidopsis thaliana contains 23 putative EXO70 genes, which can be classified into eight clusters on the …
Wa8730a014g005520	1.19699	1.01289e-96	1.41217e-92	0.686	0.266	AT2G17730;AT4G35840;AT5G66070	NIP2	Intrinsic thylakoid membrane protein that fixes RPOTmp on the stromal side of the thylakoid membrane.;RING/U-box superfamily protein;RING/U-box superfamily protein
Wa8730a005g004400	1.19642	6.07812e-144	8.47412e-140	0.372	0.008	AT5G41810
Wa8730a017g002260	1.19359	2.46835e-55	3.44138e-51	0.212	0.025
Wa8730a004g007740	1.1817	4.34733e-98	6.06105e-94	0.645	0.201	AT1G03870	FLA9	fasciclin-like arabinogalactan-protein 9 (Fla9)
Wa8730a002g003100	1.17471	1.87161e-104	2.6094e-100	0.46	0.085
Wa8730a015g002060	1.17228	3.02522e-112	4.21777e-108	0.91	0.676	AT2G24270	ALDH11A3	Encodes a protein with non-phosphorylating NADP-dependent glyceraldehyde-3-phosphate dehydrogenase activity. The activity of the enzyme was determined from leaf extracts; the enzyme has not been purified to confirm activity.
Wa8730a015g000950	1.17118	1.9641e-59	2.73835e-55	0.553	0.244	AT5G57340
Wa8730a005g004530	1.16736	2.67953e-130	3.73581e-126	0.414	0.035	AT5G42030	ABIL4	ABL interactor-like protein 4
Wa8730a003g002080	1.15434	3.44682e-68	4.80556e-64	0.801	0.505	AT5G67450;AT3G19580;AT5G43170;AT1G27730;AT3G49930;AT1G49900	AZF1, ZF1;AZF2, ZF2;AZF3, ZF3;STZ, ZAT10	Encodes zinc-finger protein. mRNA levels are elevated in response to low temperature, cold temperatures and high salt. The protein is localized to the nucleus and acts as a transcriptional repressor.;Encodes zinc finger protein. mRNA levels are upregulated in response to ABA, high salt, and mild dessication. The protein is localized to the nucleus and acts as a transcriptional repressor.;Encodes …
Wa8730a013g003810	1.15098	6.33745e-107	8.83567e-103	0.378	0.039
Wa8730a001g004980	1.13976	1.1945e-120	1.66537e-116	0.43	0.05	AT2G27050;AT3G20770;AT5G21120	AtEIL1, EIL1;AtEIN3, EIN3;EIL2	ethylene-insensitive3-like1 (EIL1);Encodes EIN3 (ethylene-insensitive3), a nuclear transcription factor that initiates downstream transcriptional cascades for ethylene responses.;ethylene-insensitive3-like2 (EIL2)
Wa8730a010g002840	1.13946	1.37561e-91	1.91787e-87	0.381	0.058
Wa8730a010g004440	1.13514	1.33765e-20	1.86495e-16	0.221	0.085
Wa8730a005g005630	1.13052	6.77137e-109	9.44064e-105	0.332	0.021	AT4G20430;AT5G45650		Subtilase family protein;subtilase family protein
Wa8730a012g001960	1.12979	1.57265e-70	2.19258e-66	0.636	0.303	AT2G31570;AT2G43350;AT1G63460	ATGPX2, GPX2;ATGPX3, GPX3;ATGPX8, GPX8	glutathione peroxidase GPx;Glutathione peroxidase. Functions as both a redox transducer and a scavenger in abscisic acid and drought stress responses. Interacts with ABI2 and ABI1.;Encodes GPX8 (glutathione peroxidase 8). Involved in the suppression of oxidative damages in nucleus and cytosol. The mRNA is cell-to-cell mobile.
Wa8730a014g004490	1.12023	1.08841e-122	1.51746e-118	0.381	0.028
Wa8730a019g001030	1.11861	2.71573e-67	3.78627e-63	0.731	0.413	AT3G55980;AT2G40140;AT5G07500;AT5G58620	ATSZF1, SZF1;ATSZF2, CZF1, SZF2, ZFAR1;AtTZF6, PEI1, TZF6;TZF9	salt-inducible zinc finger 1;zinc finger (CCCH-type) family protein;Encodes an embryo-specific zinc finger transcription factor required for heart-stage embryo formation.;zinc finger (CCCH-type) family protein
Wa8730a001g004860	1.11276	1.9657e-108	2.74058e-104	0.334	0.023	AT4G11370	RHA1A	Encodes a putative RING-H2 finger protein RHA1a.
Wa8730a009g003520	1.11193	2.6234e-24	3.65755e-20	0.218	0.074	AT3G08770	LTP6	Predicted to encode a PR (pathogenesis-related) protein. Belongs to the lipid transfer protein (PR-14) family with the following members: At2g38540/LTP1, At2g38530/LTP2, At5g59320/LTP3, At5g59310/LTP4, At3g51600/LTP5, At3g08770/LTP6, At2g15050/LTP7, At2g18370/LTP8, At2g15325/LTP9, At5g01870/LTP10, At4g33355/LTP11, At3g51590/LTP12, At5g44265/LTP13, At5g62065/LTP14, At4g08530/LTP15.
Wa8730a007g004410	1.10936	5.86421e-107	8.17588e-103	0.883	0.671	AT4G10240;AT1G06040;AT2G31380	bbx23;BBX24, STO;BBX25, STH	B-box zinc finger family protein;Encodes salt tolerance protein (STO) which confers salt tolerance to yeast cells. Fully complements calcineurin deficient yeast but does not encode a phosphoprotein phosphatase. Sequence has similarities to CONSTANS. STO co-localizes with COP1 and plays a role in light signaling.;a B-box zinc finger protein that interacts with COP1. contains a novel 11 amino acid …
Wa8730a006g005670	1.09817	6.98275e-83	9.73535e-79	0.623	0.25	AT1G70410;AT4G33580;AT5G14740	ATBCA4, BCA4, CA4;ATBCA5, BCA5;BETA, CA18, CA2	Encodes a putative beta-carbonic anhydrase betaCA4. Together with betaCA1 (At3g01500) regulates CO2-controlled stomatal movements in guard cells.;beta carbonic anhydrase 5;Encodes a beta carbonic anhydrase likely to be localized in the cytoplasm. Expression of its mRNA is seen in etiolated seedlings and points to a possible nonphotosynthetic role for this isoform.
Wa8730a004g001280	1.09253	1.84004e-112	2.56538e-108	0.378	0.036	AT1G49000;AT3G18560
Wa8730a010g003840	1.08899	2.12446e-77	2.96192e-73	0.201	0.003
Wa8730a002g001260	1.08673	4.61187e-88	6.42987e-84	0.499	0.132	AT4G24040	ATTRE1, TRE1	Encodes a trehalase, member of Glycoside Hydrolase Family 37.
Wa8730a007g003310	1.08476	7.43332e-39	1.03635e-34	0.387	0.155	AT1G74110	CYP78A10	member of CYP78A
Wa8730a020g000890	1.07856	9.22543e-69	1.28621e-64	0.393	0.1
Wa8730a011g001940	1.06868	1.94289e-73	2.70878e-69	0.702	0.375	AT2G38740		Haloacid dehalogenase-like hydrolase (HAD) superfamily protein
Wa8730a015g000890	1.06751	6.25556e-54	8.7215e-50	0.774	0.473	AT4G30290;AT5G48070;AT2G18800;AT4G25810;AT5G57550	ATXTH19, XTH19;ATXTH20, XTH20;ATXTH21, XTH21;XTH23, XTR6;XTH25, XTR3	Encodes a xyloglucan endotransglucosylase/hydrolase with only only the endotransglucosylase (XET; EC 2.4.1.207) activity towards xyloglucan and non-detectable endohydrolytic (XEH; EC 3.2.1.151) activity. Expressed throughout both the main and the lateral root, with intensive expression at the dividing and elongating regions. Is expressed in lateral root primordia but expression ceases after later…
Wa8730a001g012380	1.06065	7.65143e-72	1.06676e-67	0.268	0.031	AT2G39980;AT5G01210		HXXXD-type acyl-transferase family protein;HXXXD-type acyl-transferase family protein
Wa8730a019g000700	1.0314	1.4617e-23	2.0379e-19	0.199	0.063	AT5G59820;AT2G37430;AT2G28710;AT1G02030;AT5G03510;AT3G46070;AT3G53600	AtZAT12, RHL41, ZAT12;ZAT11	Encodes a zinc finger protein involved in high light and cold acclimation. Overexpression of this putative transcription factor increases the expression level of 9 cold-responsive genes and represses the expression level of 15 cold-responsive genes, including CBF genes. Also, lines overexpressing this gene exhibits a small but reproducible increase in freeze tolerance. Because of the repression o…
Wa8730a006g003540	1.02876	1.02143e-80	1.42408e-76	0.464	0.117	AT3G01720;AT5G13500;AT2G25260		;;
Wa8730a002g009930	1.02783	2.18488e-122	3.04616e-118	0.322	0.008	AT2G28630;AT5G04530;AT1G04220	KCS12;KCS19;KCS2	Encodes KCS12, a member of the 3-ketoacyl-CoA synthase family involved in the biosynthesis of VLCFA (very long chain fatty acids).;Encodes KCS19, a member of the 3-ketoacyl-CoA synthase family involved in the biosynthesis of VLCFA (very long chain fatty acids).;Encodes KCS2, a member of the 3-ketoacyl-CoA synthase family involved in the biosynthesis of VLCFA (very long chain fatty acids).
Wa8730a007g007400	1.0253	4.44919e-84	6.20306e-80	0.46	0.112	AT3G52450;AT2G35930;AT3G11840;AT1G49780	AtPUB22, PUB22;AtPUB23, PUB23;PUB24;PUB26	Encodes a cytoplasmically localized U-box domain E3 ubiquitin ligase protein that is involved in the response to water stress and acts as a negative regulator of PAMP-triggered immunity.;Encodes a cytoplasmically localized U-box domain containing E3 ubiquitin ligase that is involved in the response to water stress and acts as a negative regulator of PAMP-triggered immunity.;Encodes a U-box-domain…
Wa8730a006g004800	1.02282	1.4599e-82	2.03539e-78	0.424	0.094	AT2G22780	PMDH1	encodes an peroxisomal NAD-malate dehydrogenase that is involved in fatty acid beta-oxidation through providing NAD to the process of converting fatty acyl CoA to acetyl CoA.
Wa8730a014g005700	1.01916	1.10735e-15	1.54386e-11	0.66	0.579	AT4G36040;AT2G17880	DJC23, J11;DJC24	Chaperone DnaJ-domain superfamily protein;Chaperone DnaJ-domain superfamily protein
Wa8730a015g006100	1.01432	8.10928e-68	1.1306e-63	0.282	0.04	AT5G42380;AT3G01830	CML37;	calmodulin like 37;Calcium-binding EF-hand family protein
Wa8730a003g001750	1.00999	6.10185e-65	8.5072e-61	0.623	0.291
Wa8730a005g005290	1.00062	1.16343e-91	1.62205e-87	0.388	0.062	AT1G53830;AT2G43050;AT5G53370;AT3G49220	ATPME2, PME2;ATPMEPCRD;ATPMEPCRF, PMEPCRF;	encodes a pectin methylesterase;Plant invertase/pectin methylesterase inhibitor superfamily;pectin methylesterase PCR fragment F;Plant invertase/pectin methylesterase inhibitor superfamily

## Sheet: SC B DEGs
Dataset S7. Differentially Expressed Genes for Dawn Supercluster B
Genes showing significant differential expression (log2FC>1 & p_val_adj <0.05 & PCT1 > 10%) in the given supercluster versus all other cells in the dataset
PCT1: Percentage of cells within the Supercluster expressing the gene
PCT2: Percentage of cells outside the Supercluster expressing the gene
DEGs also of Dusk Supercluster B
Gene	Ave. Log2 FC	p Value	p Value Adj.	PCT1	PCT2	Arabidopsis orthologues	Arabidopsis gene names	Arabidopsis gene description
Wa8730a006g002780	3.17264	1.28469e-50	1.79111e-46	0.634	0.365
Wa8730a006g002770	2.70527	3.01353e-51	4.20146e-47	0.238	0.042	AT1G22450	ATCOX6B2, COX6B	subunit 6b of cytochrome c oxidase
Wa8730a010g002220	2.5877	7.62967e-81	1.06373e-76	0.285	0.03	AT5G53880
Wa8730a010g004750	2.57008	2.49847e-62	3.48337e-58	0.241	0.03	AT4G09600;AT1G10588	GASA3;	One of GASA gene family which is related to a GA-stimulated transcript (GAST) from tomato.;Encodes a Gibberellin-regulated GASA/GAST/Snakin family protein
Wa8730a005g004040	2.32869	3.04309e-123	4.24268e-119	0.64	0.194	AT2G46330;AT3G61640;AT5G53250	AGP16, ATAGP16;AGP20, AtAGP20;AGP22, ATAGP22	Encodes arabinogalactan protein (AGP16).;arabinogalactan protein 20;arabinogalactan protein 22
Wa8730a005g003250	1.9266	1.39523e-30	1.94524e-26	0.341	0.163	AT1G73190;AT3G16240;AT4G01470;AT2G36830;AT2G25810;AT1G52180	ALPHA-TIP, TIP3;1;AQP1, ATTIP2;1, DELTA-TIP, DELTA-TIP1, TIP2;1;ATTIP1.3, GAMMA-TIP3, TIP1;3;GAMMA-TIP, GAMMA-TIP1, TIP1;1;TIP4;1;	Moves to the Protein Storage Vacuole in a Golgi independent manner;Delta tonoplast intrinsic protein, functions as a water channel and ammonium (NH3) transporter. Highly expressed in flower, shoot, and stem. Expression shows diurnal regulation and is induced by ammonium (NH3). Protein localized to vacuolar membrane.;Encodes AtTIP1;3, functions as water and urea channels in pollen.;Encodes a tonop…
Wa8730a010g004730	1.83439	2.56467e-31	3.57567e-27	0.335	0.146	AT4G09600;AT1G10588	GASA3;	One of GASA gene family which is related to a GA-stimulated transcript (GAST) from tomato.;Encodes a Gibberellin-regulated GASA/GAST/Snakin family protein
Wa8730a020g003110	1.80066	1.29556e-06	0.0180628	0.318	0.244	AT1G24577
Wa8730a009g002620	1.72721	4.71682e-19	6.57619e-15	0.986	0.983
Wa8730a010g003550	1.58389	1.82054e-157	2.5382e-153	1	0.983	AT1G67090;AT5G38410	RBCS1A;RBCS3B	Encodes a member of the Rubisco small subunit (RBCS) multigene family: RBCS1A (At1g67090), RBCS1B (At5g38430), RBCS2B (At5g38420), and RBCS3B (At5g38410). Functions to yield sufficient Rubisco content for leaf photosynthetic capacity.;Encodes a member of the Rubisco small subunit (RBCS) multigene family: RBCS1A (At1g67090), RBCS1B (At5g38430), RBCS2B (At5g38420), and RBCS3B (At5g38410). Functions…
Wa8730a002g003250	1.53289	9.70554e-31	1.35315e-26	0.231	0.072	AT1G12090;AT4G00165;AT4G22460;AT2G45180;AT1G62510;AT5G46900;AT4G12510	ELP	extensin-like protein (ELP);Bifunctional inhibitor/lipid-transfer protein/seed storage 2S albumin superfamily protein;Bifunctional inhibitor/lipid-transfer protein/seed storage 2S albumin superfamily protein;Bifunctional inhibitor/lipid-transfer protein/seed storage 2S albumin superfamily protein;Bifunctional inhibitor/lipid-transfer protein/seed storage 2S albumin superfamily protein;Bifunctiona…
Wa8730a010g004740	1.4894	1.6048e-58	2.23741e-54	0.387	0.11	AT4G09600;AT1G10588	GASA3;	One of GASA gene family which is related to a GA-stimulated transcript (GAST) from tomato.;Encodes a Gibberellin-regulated GASA/GAST/Snakin family protein
Wa8730a017g003860	1.47889	6.35745e-68	8.86355e-64	0.808	0.574	AT1G29930;AT5G54270	AB140, CAB1, CAB140, LHCB1.3;LHCB3, LHCB3*1	Subunit of light-harvesting complex II (LHCII),which absorbs light and transfers energy to the photosynthetic reaction center.;Lhcb3 protein is a component of the main light harvesting chlorophyll a/b-protein complex of Photosystem II (LHC II).
Wa8730a005g003170	1.44769	4.11856e-100	5.7421e-96	0.993	0.921	AT1G73190;AT3G16240;AT4G01470;AT2G36830;AT2G25810;AT1G52180	ALPHA-TIP, TIP3;1;AQP1, ATTIP2;1, DELTA-TIP, DELTA-TIP1, TIP2;1;ATTIP1.3, GAMMA-TIP3, TIP1;3;GAMMA-TIP, GAMMA-TIP1, TIP1;1;TIP4;1;	Moves to the Protein Storage Vacuole in a Golgi independent manner;Delta tonoplast intrinsic protein, functions as a water channel and ammonium (NH3) transporter. Highly expressed in flower, shoot, and stem. Expression shows diurnal regulation and is induced by ammonium (NH3). Protein localized to vacuolar membrane.;Encodes AtTIP1;3, functions as water and urea channels in pollen.;Encodes a tonop…
Wa8730a014g005090	1.41603	2.16508e-84	3.01856e-80	0.496	0.133	AT1G12090;AT4G00165;AT4G22460;AT1G62510;AT2G45180;AT4G12510	ELP	extensin-like protein (ELP);Bifunctional inhibitor/lipid-transfer protein/seed storage 2S albumin superfamily protein;Bifunctional inhibitor/lipid-transfer protein/seed storage 2S albumin superfamily protein;Bifunctional inhibitor/lipid-transfer protein/seed storage 2S albumin superfamily protein;Bifunctional inhibitor/lipid-transfer protein/seed storage 2S albumin superfamily protein;Encodes a m…
Wa8730a009g000730	1.40641	1.90242e-30	2.65236e-26	0.592	0.429	AT3G46010;AT5G59890;AT4G00680	ADF1, ATADF1, atadf;ADF4, ATADF4;ADF8	Actin-depolymerizing factor (ADF) and cofilin define a family of actin-binding proteins essential for the rapid turnover of filamentous actin in vivo.;actin depolymerizing factor 4 (ADF4) mRNA, complete cds;actin depolymerizing factor 8
Wa8730a006g001200	1.29008	4.09271e-80	5.70606e-76	0.325	0.045	AT3G22120;AT4G15160;AT1G62500	CWLP	cell wall-plasma membrane linker protein homolog (CWLP);Bifunctional inhibitor/lipid-transfer protein/seed storage 2S albumin superfamily protein;Bifunctional inhibitor/lipid-transfer protein/seed storage 2S albumin superfamily protein
Wa8730a015g000860	1.22835	5.28208e-57	7.36428e-53	0.568	0.24	AT5G48070;AT2G18800;AT4G30270;AT4G25810;AT5G57550	ATXTH20, XTH20;ATXTH21, XTH21;MERI-5, MERI5B, SEN4, XTH24;XTH23, XTR6;XTH25, XTR3	putative xyloglucan endotransglycosylase/hydrolase, expressed primarily in the stele of mature non-elongating regions of both the main and the lateral root. Is expressed in lateral root primordia but expression ceases after lateral root begins to grow.;xyloglucan endotransglucosylase/hydrolase 21;encodes a protein similar to endo xyloglucan transferase in sequence. It is also very similar to BRU1…
Wa8730a012g005370	1.21065	3.10656e-69	4.33117e-65	0.938	0.877	AT3G47470	CAB4, LHCA4	Encodes a chlorophyll a/b-binding protein that is more similar to the PSI Cab proteins than the PSII cab proteins. The predicted protein is about 20 amino acids shorter than most known Cab proteins.
Wa8730a005g004460	1.19932	7.18653e-76	1.00195e-71	0.559	0.199	AT2G34070;AT1G29050;AT2G42570;AT2G31110;AT3G14850	TBL37;TBL38;TBL39;TBL40;TBL41	Encodes a member of the TBL (TRICHOME BIREFRINGENCE-LIKE) gene family containing a plant-specific DUF231 (domain of unknown function) domain. TBL gene family has 46 members, two of which (TBR/AT5G06700 and TBL3/AT5G01360) have been shown to be involved in the synthesis and deposition of secondary wall cellulose, presumably by influencing the esterification state of pectic polymers. A nomenclature…
Wa8730a009g004140	1.19344	4.03418e-48	5.62445e-44	0.269	0.061	AT5G16730;AT3G05900		Encodes a microtubule-associated protein. The mRNA is cell-to-cell mobile.;neurofilament protein-related
Wa8730a012g004140	1.18032	1.26409e-14	1.7624e-10	0.387	0.262	AT5G37600;AT3G17820;AT1G66200;AT1G48470	ATGLN1;1, ATGSR1, GLN1;1, GSR;ATGSKB6, GLN1.3, GLN1;3;ATGSR2, GLN1;2, GSR2;GLN1;5	encodes a cytosolic glutamine synthetase, the enzyme has high affinity with substrate ammonium;encodes a cytosolic glutamine synthetase, the enzyme has low affinity with substrate ammonium;encodes a cytosolic glutamate synthetase, this enzyme has low affinity with substrate ammonium;Encodes cytosolic glutamine synthase isozyme. Expression of mRNA is not detectable in roots.
Wa8730a016g002350	1.13489	6.64313e-70	9.26186e-66	0.808	0.483	AT1G37130;AT1G77760	ATNR2, B29, CHL3, NIA2, NIA2-1, NR, NR2;GNR1, NIA1, NR1	Identified as a mutant resistant to chlorate. Encodes nitrate reductase structural gene. Involved in nitrate assimilation. Has nitrate reductase activity. Up-regulated by the fungus P. indica. Binds transcription factor At2g35940.;Encodes the cytosolic minor isoform of nitrate reductase (NR). Involved in the first step of nitrate assimilation, it contributes about 15% of the nitrate reductase act…
Wa8730a015g000790	1.1271	1.98669e-70	2.76984e-66	0.618	0.243	AT5G48070;AT2G18800;AT4G30270;AT4G25810;AT5G57550	ATXTH20, XTH20;ATXTH21, XTH21;MERI-5, MERI5B, SEN4, XTH24;XTH23, XTR6;XTH25, XTR3	putative xyloglucan endotransglycosylase/hydrolase, expressed primarily in the stele of mature non-elongating regions of both the main and the lateral root. Is expressed in lateral root primordia but expression ceases after lateral root begins to grow.;xyloglucan endotransglucosylase/hydrolase 21;encodes a protein similar to endo xyloglucan transferase in sequence. It is also very similar to BRU1…
Wa8730a009g004480	1.1138	6.2657e-140	8.73564e-136	0.978	0.933
Wa8730a006g005790	1.08965	3.99381e-65	5.56817e-61	0.947	0.912	AT1G15820	CP24, LHCB6	Lhcb6 protein (Lhcb6), light harvesting complex of photosystem II.
Wa8730a007g002830	1.02411	1.27879e-71	1.78289e-67	0.958	0.936
Wa8730a005g003780	1.0021	3.30184e-23	4.60343e-19	0.114	0.021	AT4G23630;AT4G11220;AT5G41600;AT1G64090;AT4G01230;AT2G46170;AT3G61560	BTI1, RTNLB1;BTI2, RTNLB2;BTI3, RTNLB4;RTNLB3	VIRB2-interacting protein 1;VIRB2-interacting protein 2;VIRB2-interacting protein 3;Reticulan like protein B3;Reticulon family protein;Reticulon family protein;Reticulon family protein
Wa8730a006g000440	2.58604	6.62641e-173	9.23855e-169	0.847	0.348	AT5G54770	THI1, THI4, TZ	Encodes a thiamine biosynthetic gene that has a dual function in thiamine biosynthesis and mitochondrial DNA damage tolerance. It appears to be involved in producing the thiazole portion of thiamine (vitamin B1). A crystal structure of the protein reveals that it forms a 2-ring homo-octamer.
Wa8730a005g008430	1.73627	8.90409e-135	1.24141e-130	0.902	0.529	AT1G67090;AT5G38430	RBCS1A;RBCS1B	Encodes a member of the Rubisco small subunit (RBCS) multigene family: RBCS1A (At1g67090), RBCS1B (At5g38430), RBCS2B (At5g38420), and RBCS3B (At5g38410). Functions to yield sufficient Rubisco content for leaf photosynthetic capacity.;Encodes a member of the Rubisco small subunit (RBCS) multigene family: RBCS1A (At1g67090), RBCS1B (At5g38430), RBCS2B (At5g38420), and RBCS3B (At5g38410).
Wa8730a015g000810	1.7346	6.46991e-105	9.02035e-101	0.704	0.281	AT4G25820;AT4G30290;AT5G48070;AT2G18800;AT5G57550	ATXTH14, XTH14, XTR9;ATXTH19, XTH19;ATXTH20, XTH20;ATXTH21, XTH21;XTH25, XTR3	Encodes a xyloglucan endotransglycosylase with a clear preference for non-fucosylated xyloglucan polymer.;Encodes a xyloglucan endotransglucosylase/hydrolase with only only the endotransglucosylase (XET; EC 2.4.1.207) activity towards xyloglucan and non-detectable endohydrolytic (XEH; EC 3.2.1.151) activity. Expressed throughout both the main and the lateral root, with intensive expression at the…
Wa8730a007g001290	1.56285	3.31921e-104	4.62764e-100	0.863	0.637	AT1G10960	ATFD1, FD1	ferredoxin 1
Wa8730a005g007240	1.54218	2.21143e-142	3.08317e-138	0.965	0.863	AT1G67090;AT5G38430	RBCS1A;RBCS1B	Encodes a member of the Rubisco small subunit (RBCS) multigene family: RBCS1A (At1g67090), RBCS1B (At5g38430), RBCS2B (At5g38420), and RBCS3B (At5g38410). Functions to yield sufficient Rubisco content for leaf photosynthetic capacity.;Encodes a member of the Rubisco small subunit (RBCS) multigene family: RBCS1A (At1g67090), RBCS1B (At5g38430), RBCS2B (At5g38420), and RBCS3B (At5g38410).
Wa8730a002g007210	1.503	4.33617e-46	6.04548e-42	0.494	0.239	AT1G03630;AT5G54190;AT4G27440	POR, PORC;PORA;PORB	Encodes for a protein with protochlorophyllide oxidoreductase activity. The enzyme is NADPH- and light-dependent.;light-dependent NADPH:protochlorophyllide oxidoreductase A;light-dependent NADPH:protochlorophyllide oxidoreductase B
Wa8730a006g000470	1.35034	2.08269e-66	2.90369e-62	0.782	0.603	AT1G11860		Glycine cleavage T-protein family
Wa8730a010g003390	1.32838	1.62546e-160	2.26622e-156	0.986	0.948	AT1G67090;AT5G38410	RBCS1A;RBCS3B	Encodes a member of the Rubisco small subunit (RBCS) multigene family: RBCS1A (At1g67090), RBCS1B (At5g38430), RBCS2B (At5g38420), and RBCS3B (At5g38410). Functions to yield sufficient Rubisco content for leaf photosynthetic capacity.;Encodes a member of the Rubisco small subunit (RBCS) multigene family: RBCS1A (At1g67090), RBCS1B (At5g38430), RBCS2B (At5g38420), and RBCS3B (At5g38410). Functions…
Wa8730a014g001330	1.30139	1.24497e-39	1.73574e-35	0.488	0.243	AT2G03680;AT1G26355;AT1G69230;AT3G02180;AT5G15600	SKU6, SPR1;SP1L1;SP1L2;SP1L3;SP1L4	The SPR1 gene encodes a plant-specific 12-kD protein which has a repeated motif at both ends, separated by a predicted rod-like domain, suggesting that it may act as an intermolecular linker. Ubiquitously expressed and belongs to a six-member gene family in Arabidopsis; expressed in transgenic seedlings localized to microtubules within the cortical array, preprophase band, phragmoplast, and mitot…
Wa8730a005g007230	1.29015	8.85422e-96	1.23446e-91	0.855	0.621	AT1G67090;AT5G38420	RBCS1A;RBCS2B	Encodes a member of the Rubisco small subunit (RBCS) multigene family: RBCS1A (At1g67090), RBCS1B (At5g38430), RBCS2B (At5g38420), and RBCS3B (At5g38410). Functions to yield sufficient Rubisco content for leaf photosynthetic capacity.;Encodes a member of the Rubisco small subunit (RBCS) multigene family: RBCS1A (At1g67090), RBCS1B (At5g38430), RBCS2B (At5g38420), and RBCS3B (At5g38410).
Wa8730a017g000530	1.24217	1.48638e-90	2.07232e-86	0.89	0.775	AT2G35370;AT1G32470	GDCH	Encodes glycine decarboxylase complex H protein. Involved in photorespiration.;Single hybrid motif superfamily protein
Wa8730a018g003740	1.20953	2.42462e-101	3.38041e-97	0.915	0.838	AT1G09340	CRB, CSP41B, HIP1.3	Encodes CHLOROPLAST RNA BINDING (CRB), a putative RNA-binding protein. CRB is important for the proper functioning of the chloroplast. Mutations in CRB also affects the circadian system, altering the expression of both oscillator and output genes.
Wa8730a001g001580	1.20315	3.12273e-116	4.35371e-112	0.928	0.847	AT3G17820;AT1G66200;AT1G48470	ATGSKB6, GLN1.3, GLN1;3;ATGSR2, GLN1;2, GSR2;GLN1;5	encodes a cytosolic glutamine synthetase, the enzyme has low affinity with substrate ammonium;encodes a cytosolic glutamate synthetase, this enzyme has low affinity with substrate ammonium;Encodes cytosolic glutamine synthase isozyme. Expression of mRNA is not detectable in roots.
Wa8730a008g001170	1.17253	1.81397e-96	2.52904e-92	0.915	0.819
Wa8730a020g002810	1.16497	2.66074e-74	3.70961e-70	0.77	0.547
Wa8730a010g003380	1.13653	7.59607e-62	1.05904e-57	0.705	0.454	AT1G67090;AT5G38410	RBCS1A;RBCS3B	Encodes a member of the Rubisco small subunit (RBCS) multigene family: RBCS1A (At1g67090), RBCS1B (At5g38430), RBCS2B (At5g38420), and RBCS3B (At5g38410). Functions to yield sufficient Rubisco content for leaf photosynthetic capacity.;Encodes a member of the Rubisco small subunit (RBCS) multigene family: RBCS1A (At1g67090), RBCS1B (At5g38430), RBCS2B (At5g38420), and RBCS3B (At5g38410). Functions…
Wa8730a012g002080	1.12444	5.55522e-55	7.74509e-51	0.699	0.417	AT3G26740	CCL	transcripts are differentially regulated at the level of mRNA stability at different times of day controlled by the circadian clock. mRNAs are targets of the mRNA degradation pathway mediated by the downstream (DST) instability determinant.
Wa8730a008g004450	1.08953	2.48469e-127	3.46416e-123	0.988	0.972	AT4G21280;AT4G05180	PSBQ, PSBQ-1, PSBQA;PSBQ, PSBQ-2, PSII-Q	Encodes the PsbQ subunit of the oxygen evolving complex of photosystem II.;Encodes the PsbQ subunit of the oxygen evolving complex of photosystem II.
Wa8730a002g002820	1.08886	5.2554e-68	7.32708e-64	0.864	0.763	AT3G60750;AT2G45290	AtTKL1, TKL1;TKL2	Transketolase;Transketolase
Wa8730a002g000800	1.05373	6.83488e-46	9.52918e-42	0.678	0.46
Wa8730a003g001430	1.04669	2.89832e-35	4.04083e-31	0.896	0.836	AT2G21660;AT1G17640	ATGRP7, CCR2, GR-RBP7, GRP7;	Encodes a small glycine-rich RNA binding protein that is part of a negative-feedback loop through which AtGRP7 regulates the circadian oscillations of its own transcript. Gene expression is induced by cold. GRP7 appears to promote stomatal opening and reduce tolerance under salt and dehydration stress conditions, but, promotes stomatal closing and thereby increases stress tolerance under conditio…
Wa8730a008g001270	1.04279	2.56161e-91	3.5714e-87	0.918	0.857	AT4G02770;AT1G03130	PSAD-1;PSAD-2	Encodes a protein predicted by sequence similarity with spinach PsaD to be photosystem I reaction center subunit II (PsaD1);Encodes a protein predicted by sequence similarity with spinach PsaD to be photosystem I reaction center subunit II (PsaD2)
Wa8730a019g003840	1.04022	6.89451e-47	9.61233e-43	0.665	0.445	AT3G17465	RPL3P	encodes a putative L3 ribosomal protein targeted to the plastid.
Wa8730a007g006480	1.03946	1.61827e-132	2.25619e-128	0.997	0.985	AT5G64040	PSAN	Encodes the only subunit of photosystem I located entirely in the thylakoid lumen. May be involved in the interaction between plastocyanin and the photosystem I complex.
Wa8730a002g007150	1.03847	3.53946e-71	4.93471e-67	0.828	0.676	AT5G23440;AT5G08410	FTRA1;FTRA2	ferredoxin/thioredoxin reductase subunit A (variable subunit) 1;ferredoxin/thioredoxin reductase subunit A (variable subunit) 2
Wa8730a012g000440	1.02952	4.54918e-128	6.34247e-124	0.993	0.991
Wa8730a017g003930	1.01981	9.83516e-41	1.37122e-36	0.556	0.296	AT1G29930;AT5G54270	AB140, CAB1, CAB140, LHCB1.3;LHCB3, LHCB3*1	Subunit of light-harvesting complex II (LHCII),which absorbs light and transfers energy to the photosynthetic reaction center.;Lhcb3 protein is a component of the main light harvesting chlorophyll a/b-protein complex of Photosystem II (LHC II).
Wa8730a002g004220	1.0152	2.54802e-55	3.55245e-51	0.689	0.439	AT1G76080	ATCDSP32, CDSP32	Encodes a thioredoxin localized in chloroplast stroma. Known as CDSP32 (CHLOROPLASTIC DROUGHT-INDUCED STRESS PROTEIN OF 32 KD).
Wa8730a007g002690	1.01403	8.68523e-130	1.21089e-125	0.988	0.982	AT4G12800	PSAL	Encodes subunit L of photosystem I reaction center.
Wa8730a009g006400	1.0034	2.19516e-26	3.06049e-22	0.776	0.645	AT1G13950;AT1G26630;AT1G69410	ATELF5A-1, EIF-5A, EIF5A, ELF5A-1;ATELF5A-2, ELF5A-2, FBR12;ATELF5A-3, ELF5A-3	Encodes eukaryotic translation initiation factor 5A (EIF-5A).In mammalian cells it functions as a shuttle protein that translocates mRNA from the nucleus to cytoplasmic ribosomes. Overexpression results in an increase in both primary and secondary xylem formation. In RNAi suppressed lines, xylem formation is reduced.;Eukaryotic translation initiation factor 5A-2. Involved in programmed cell death…

## Sheet: SC C DEGs
Dataset S7. Differentially Expressed Genes for Dawn Supercluster C
Genes showing significant differential expression (log2FC>1 & p_val_adj <0.05 & PCT1 > 10%) in the given supercluster versus all other cells in the dataset
PCT1: Percentage of cells within the Supercluster expressing the gene
PCT2: Percentage of cells outside the Supercluster expressing the gene
DEGs also of Dusk Supercluster C
Gene	Ave. Log2 FC	p Value	p Value Adj.	PCT1	PCT2	Arabidopsis orthologues	Arabidopsis gene names	Arabidopsis gene description
Wa8730a008g001000	5.17677	0	0	0.921	0.224
Wa8730a008g000620	4.827	7.45515e-298	1.0394e-293	0.968	0.444
Wa8730a003g005480	4.56042	8.47159e-257	1.18111e-252	0.928	0.399
Wa8730a008g001340	4.45004	5.84806e-252	8.15337e-248	0.875	0.284
Wa8730a014g002170	4.17946	0	0	0.87	0.059
Wa8730a014g002180	3.47642	0	0	0.818	0.034
Wa8730a012g004900	3.35808	0	0	0.783	0.036	AT5G10180;AT1G78000;AT4G08620;AT1G22150	AST68, SULTR2;1;SEL1, SULTR1;2;SULTR1;1;SULTR1;3	Encodes a low-affinity sulfate transporter expressed in the root cap and central cylinder, where it is induced by sulfur starvation. Expression in the shoot vascular system is not induced by sulfur starvation.;Encodes a sulfate transporter that can restore sulfate uptake capacity of a yeast mutant lacking sulfate transporter genes.;Encodes a sulfate transporter. Contains STAS domain. Expressed in…
Wa8730a001g000280	3.22192	0	0	0.815	0.051	AT3G12500;AT4G01700;AT1G02360	ATHCHIB, B-CHI, CHI-B, HCHIB, PR-3, PR3	encodes a basic chitinase involved in ethylene/jasmonic acid mediated signalling pathway during systemic acquired resistance based on expression analyses.;Chitinase family protein;Chitinase family protein
Wa8730a006g002120	2.69498	5.38974e-234	7.51438e-230	0.947	0.562	AT5G50200;AT4G24715	ATNRT3.1, NRT3.1, WR3;NA	Wound-responsive gene 3 (WR3). Encodes a high-affinity nitrate transporter. Up-regulated by nitrate. Involved in jasmonic acid-independent wound signal transduction.;NA
Wa8730a016g003520	2.67843	3.34423e-210	4.66253e-206	0.891	0.43	AT5G37600;AT3G17820;AT5G35630;AT1G66200;AT5G16570;AT1G48470	ATGLN1;1, ATGSR1, GLN1;1, GSR;ATGSKB6, GLN1.3, GLN1;3;ATGSL1, GLN2, GS2;ATGSR2, GLN1;2, GSR2;GLN1;4;GLN1;5	encodes a cytosolic glutamine synthetase, the enzyme has high affinity with substrate ammonium;encodes a cytosolic glutamine synthetase, the enzyme has low affinity with substrate ammonium;chloroplastic glutamine synthetase;encodes a cytosolic glutamate synthetase, this enzyme has low affinity with substrate ammonium;Encodes a cytosolic glutamine synthetase, the enzyme has high affinity with subs…
Wa8730a009g003530	2.67383	3.68803e-225	5.14185e-221	1	0.897	AT2G38530	LP2, LTP2, cdf3	Involved in lipid transfer between membranes. Belongs to a family of Lipid transfer proteins. Sequence similarity to other plant/Arabidopsis LPT genes but highest similarity to LPT1. Stress and pathogen-inducible motifs found in the upstream region. Expressed in flower, leaves and siliques but absent in roots. Predicted to be a member of PR-14 pathogenesis-related protein family with the followin…
Wa8730a014g002160	2.62847	4.59518e-247	6.4066e-243	0.606	0.019
Wa8730a001g011180	2.53066	2.03781e-263	2.84111e-259	0.751	0.082	AT5G02540;AT2G37540;AT4G11410		NAD(P)-binding Rossmann-fold superfamily protein;NAD(P)-binding Rossmann-fold superfamily protein;NAD(P)-binding Rossmann-fold superfamily protein
Wa8730a020g000810	2.34389	6.56022e-182	9.14626e-178	0.84	0.287	AT3G52720;AT2G28210;AT5G04180;AT1G08080	ACA1, ATACA1, CAH1;ACA2, ATACA2;ACA3, ATACA3;ACA7, ATACA7	Encodes a putative alpha carbonic anhydrase (CAH1) located in the chloroplast stroma. Most chloroplast proteins are encoded by the nuclear genome and imported with the help of sorting signals that are intrinsic parts of the polypeptides. CAH1 takes an alternative route through the secretory pathway, and becomes N-glycosylated before entering the chloroplast.;alpha carbonic anhydrase 2;alpha carbo…
Wa8730a007g008670	2.268	7.78623e-161	1.08556e-156	0.733	0.209	AT3G29260;AT4G03140		NAD(P)-binding Rossmann-fold superfamily protein;NAD(P)-binding Rossmann-fold superfamily protein
Wa8730a009g003160	2.18226	4.75215e-214	6.62545e-210	0.588	0.038
Wa8730a008g003840	2.17534	6.4215e-149	8.95286e-145	0.545	0.079	AT4G19690;AT3G12750;AT2G30080;AT1G31260;AT2G32270;AT1G05300;AT2G04032	ATIRT1, IRT1;AtZIP1, ZIP1;ATZIP6, ZIP6;ZIP10;ZIP3;ZIP5;ZIP7	Fe(II) transport protein (IRT1);A member of Zrt- and Irt-related protein (ZIP) family. transcript is induced in response to zinc deficiency in the root.;member of Fe(II) transporter isolog family. Gene expression is not regulated by iron, copper, or zinc deficiency or excess.;member of Fe(II) transporter isolog family;A member of Zrt- and Irt-related protein (ZIP) family. transcript is induced in…
Wa8730a001g007090	2.16981	5.2467e-102	7.31495e-98	0.349	0.035	AT2G41480;AT5G05340	AtPRX25, PRX25;PRX52	Encodes a cationic cell-wall-bound peroxidase homolog that is involved in the lignification of cell walls.;Encodes a protein with sequence similarity to peroxidases that is involved in lignin biosynthesis. Loss of function mutations show abnormal development of xylem fibers and reduced levels of lignin biosynthetic enxymes.
Wa8730a001g006060	2.13485	3.5174e-192	4.90396e-188	0.696	0.132	AT3G10960	ATAZG1, AZG1	Encodes a homolog of the adenine-guanine-hypoxanthine transporter AzgA of Aspergillus nidulans. Function as a plant adenine-guanine transporter. Two closely related genes exist in Arabidopsis: AT3G10960 (Azg1) and AT5G50300 (Azg2).
Wa8730a009g004310	2.12983	4.16844e-224	5.81164e-220	0.591	0.031	AT1G02335;AT3G62020;AT1G09560;AT3G05930;AT3G04200	GL22, PDGLP2;GLP10;GLP5, PDGLP1;GLP8;	Encodes a plasodesmata-located protein involved in regulating primary root growth by controlling phloem-mediated allocation of resources between the primary and lateral root meristems.;germin-like protein (GLP10);germin-like protein (GLP5);germin-like protein (GLP8);RmlC-like cupins superfamily protein
Wa8730a010g000090	2.11061	2.5852e-161	3.60428e-157	0.827	0.346
Wa8730a015g000910	2.08366	2.52042e-141	3.51397e-137	0.386	0.015	AT4G31500;AT5G07990	ATR4, CYP83B1, RED1, RNT1, SUR2;CYP75B1, D501, TT7	Encodes an oxime-metabolizing enzyme in the biosynthetic pathway of glucosinolates. Is required for phytochrome signal transduction in red light. Mutation confers auxin overproduction.;Required for flavonoid 3' hydroxylase activity.
Wa8730a004g001070	2.03186	9.17466e-142	1.27913e-137	0.801	0.359	AT5G60770;AT1G12940	ATNRT2.4, NRT2.4;ATNRT2.5, NRT2.5	member of High affinity nitrate transporter family;member of High affinity nitrate transporter family
Wa8730a016g002860	1.99128	7.27839e-162	1.01475e-157	0.792	0.242	AT1G68610;AT3G18470;AT1G49030	PCR11;;	Target promoter of the male germline-specific transcription factor DUO1.;PLAC8 family protein;PLAC8 family protein
Wa8730a020g002990	1.98312	2.56313e-188	3.57352e-184	0.95	0.703	AT1G13440;AT3G04120;AT1G79530;AT1G16300	GAPC-2, GAPC2;GAPC, GAPC-1, GAPC1;GAPCP-1;GAPCP-2	The expression level of GAPC-2 is upregulated in Arabidopsis seedlings exposed to cadmium.;encodes cytosolic GADPH (C subunit) involved in the glycolytic pathway but also interacts with H2O2 potentially placing it in a signalling cascade induced by ROS.;Encodes one of the chloroplast/plastid localized GAPDH isoforms (GAPCp1/At1g79530 and GAPCp2/At1g16300). gapcp double mutants display a drastic p…
Wa8730a009g003220	1.89549	5.46359e-131	7.61733e-127	0.372	0.019
Wa8730a002g001530	1.87527	1.69628e-133	2.36495e-129	0.779	0.284	AT4G24130		Protein of unknown function, DUF538
Wa8730a017g002540	1.86768	5.10207e-161	7.11331e-157	0.856	0.375	AT2G45960;AT3G61430;AT1G01620;AT4G00430;AT4G23400;AT2G37170;AT2G39010;AT4G35100;AT2G16850	ATHH2, PIP1;2, PIP1B, TMP-A;ATPIP1, PIP1, PIP1;1, PIP1A;PIP1;3, PIP1C, TMP-B;PIP1;4, PIP1E, TMP-C;PIP1;5, PIP1D;PIP2;2, PIP2B;PIP2;6, PIP2E;PIP2;7, PIP3, PIP3A, SIMIP;PIP2;8, PIP3B	a member of the plasma membrane intrinsic protein subfamily PIP1. localizes to the plasma membrane and exhibits water transport activity in Xenopus oocyte. expressed ubiquitously and protein level decreases slightly during leaf development.;a member of the plasma membrane intrinsic protein subfamily PIP1. localizes to the plasma membrane and exhibits water transport activity in Xenopus oocyte. ex…
Wa8730a005g001430	1.84036	1.79827e-199	2.50715e-195	0.543	0.03	AT1G13140;AT4G39490;AT5G02900;AT4G32170;AT5G52320;AT2G21910;AT1G47620	CYP86C3;CYP96A10;CYP96A13;CYP96A2;CYP96A4;CYP96A5;CYP96A8	member of CYP86C;member of CYP96A;member of CYP96A;member of CYP96A;member of CYP96A;member of CYP96A;member of CYP96A
Wa8730a013g005830	1.79481	1.17182e-165	1.63375e-161	0.894	0.522	AT1G04410	c-NAD-MDH1	predicted to encode a cytosolic malate dehydrogenase.
Wa8730a006g003200	1.74566	1.5311e-189	2.13466e-185	0.481	0.015
Wa8730a006g004140	1.71479	1.34354e-119	1.87316e-115	0.323	0.011	AT2G41480;AT5G64120;AT5G66390;AT1G05260;AT2G22420;AT2G34060;AT3G21770;AT5G15180;AT5G39580;AT1G49570;AT1G14550	AtPRX25, PRX25;AtPRX71, PRX71;PRX72;RCI3, RCI3A	Encodes a cationic cell-wall-bound peroxidase homolog that is involved in the lignification of cell walls.;encodes a cell wall bound peroxidase that is induced by hypo-osmolarity;Encodes a peroxidase that is involved in lignin biosynthesis.;Encodes a cold-inducible cationic peroxidase that is involved in the stress response. In response to low temperature, RCI3 transcripts accumulate in the aeria…
Wa8730a001g007820	1.68864	1.15577e-126	1.61138e-122	0.674	0.208	AT2G18960;AT1G17260;AT5G62670;AT4G30190;AT5G57350;AT2G24520;AT2G07560;AT1G80660	AHA1, HA1, OST2, PMA;AHA10;AHA11, HA11;AHA2, HA2, PMA2;AHA3, ATAHA3, HA3;AHA5, HA5;AHA6, HA6;AHA9, HA9	Encodes a plasma membrane proton ATPase. Mutants have a reduced ability to close their stomata in response to drought and are affected in stomatal but not seed responsiveness to ABA.;belongs to H+-APTase gene family, involved in proanthocyanidin biosynthesis, disturbs the vacuolar biogenesis and acidification process;H(+)-ATPase 11;belongs to the P-type ATPase superfamily of cation-transporting A…
Wa8730a003g001030	1.68791	4.98807e-121	6.95437e-117	0.831	0.452	AT2G16060	AHB1, ARATH, ATGLB1, GLB1, HB1, NSHB1	Encodes a class 1 nonsymbiotic hemoglobin induced by low oxygen levels with very high oxygen affinity. It is not likely to be a hemoglobin transporter because of its extremely high affinity for oxygen.
Wa8730a014g001670	1.66099	1.15944e-181	1.61649e-177	0.452	0.01
Wa8730a010g000690	1.58837	1.4579e-164	2.03261e-160	0.405	0.006	AT4G31800;AT4G22070	ATWRKY18, WRKY18;ATWRKY31, WRKY31	Pathogen-induced transcription factor. Binds W-box sequences in vitro. Forms protein complexes with itself and with WRKY40 and WRKY60. Constitutive expression of WRKY18 enhanced resistance to P. syringae, but its coexpression with WRKY40 or WRKY60 made plants more susceptible to both P. syringae and B. cinerea. WRKY18, WRKY40, and WRKY60 have partially redundant roles in response to the hemibiotr…
Wa8730a001g007430	1.54862	1.76363e-122	2.45885e-118	0.654	0.206	AT4G25850;AT5G57240	ORP4B;ORP4C	OSBP(oxysterol binding protein)-related protein 4B;OSBP(oxysterol binding protein)-related protein 4C
Wa8730a001g006770	1.53181	1.15324e-59	1.60785e-55	0.553	0.233
Wa8730a006g001340	1.51195	3.58825e-104	5.00274e-100	0.78	0.418	AT1G79550	PGK	Encodes cytosolic phosphoglycerate kinase (PGK).
Wa8730a001g010580	1.49911	5.2701e-84	7.34757e-80	0.296	0.029	AT3G09590;AT4G33720;AT4G31470		CAP (Cysteine-rich secretory proteins, Antigen 5, and Pathogenesis-related 1 protein) superfamily protein;CAP (Cysteine-rich secretory proteins, Antigen 5, and Pathogenesis-related 1 protein) superfamily protein;CAP (Cysteine-rich secretory proteins, Antigen 5, and Pathogenesis-related 1 protein) superfamily protein
Wa8730a020g000340	1.49189	1.48518e-91	2.07064e-87	0.9	0.618
Wa8730a020g003020	1.41892	5.60737e-86	7.8178e-82	0.654	0.278	AT1G24400;AT5G40780;AT1G67640;AT3G01760	AATL2, ATLHT2, LHT2;LHT1	High-affinity transporter for neutral and acidic amino acids, expressed in tapetum tissue of anthers;Encodes LHT1 (lysine histidine transporter), a high-affinity transporter for cellular amino acid uptake in both root epidermis and leaf mesophyll.;Transmembrane amino acid transporter family protein;Encodes an amino acid transporter expressed in the root that is involved in the uptake of acidic am…
Wa8730a007g003770	1.39755	1.07041e-102	1.49237e-98	0.751	0.307	AT1G78460		SOUL heme-binding family protein
Wa8730a003g008790	1.39529	5.04511e-127	7.0339e-123	0.518	0.092	AT5G06440;AT3G11720		;Polyketide cyclase/dehydrase and lipid transport superfamily protein
Wa8730a001g007510	1.38384	1.06293e-115	1.48194e-111	0.867	0.641	AT1G51650		ATP synthase epsilon chain, mitochondrial
Wa8730a007g005010	1.38244	1.05655e-99	1.47304e-95	0.799	0.414	AT1G09400		FMN-linked oxidoreductases superfamily protein
Wa8730a009g003140	1.36154	9.13491e-95	1.27359e-90	0.6	0.199
Wa8730a003g000980	1.34984	3.39361e-96	4.73137e-92	0.792	0.427	AT2G22860;AT3G49780;AT4G37720	ATPSK2, PSK2;ATPSK3, ATPSK4, PSK4;ATPSK6, PSK6	Phytosulfokine 2 precursor, coding for a unique plant peptide growth factor.;Phytosulfokine 3 precursor, coding for a unique plant peptide growth factor. Plants overexpressing this gene (under a 35S promoter), develop normal cotyledons and hypocotyls but their growth, in particular that of their roots, was faster than that of wildtype.;Probable phytosulfokines 6 precursor, coding for a unique pla…
Wa8730a013g001900	1.34018	8.77023e-72	1.22275e-67	0.336	0.06	AT4G12310;AT2G45570;AT2G46660;AT1G01190	CYP706A5;CYP76C2;CYP78A6, EOD3;CYP78A8	member of CYP706A;member of CYP76C;member of CYP78A;member of CYP78A
Wa8730a009g000440	1.32995	1.11387e-87	1.55296e-83	0.805	0.549	AT3G55440	ATCTIMC, CYTOTPI, TPI	Encodes triosephosphate isomerase.
Wa8730a003g005380	1.30113	1.84981e-93	2.57901e-89	0.32	0.031	AT3G46860;AT5G43570		Predicted to encode a PR (pathogenesis-related) peptide that belongs to the PR-6 proteinase inhibitor family. Six putative PR-6-type protein encoding genes are found in Arabidopsis: At2g38900, At2g38870, At5g43570, At5g43580, At3g50020 and At3g46860.;Predicted to encode a PR (pathogenesis-related) peptide that belongs to the PR-6 proteinase inhibitor family. Six putative PR-6-type protein encodin…
Wa8730a016g001330	1.29372	1.17706e-91	1.64105e-87	0.588	0.185	AT1G22250;AT4G08910;AT1G78170
Wa8730a016g002960	1.28466	6.77051e-111	9.43944e-107	0.884	0.693	AT1G22300;AT5G10450;AT1G78300;AT4G09000;AT1G26480;AT5G16050;AT3G02520	14-3-3EPSILON, GF14, GRF10;14-3-3lambda, AFT1, GRF6;14-3-3OMEGA, GF14, GRF2;GF14, GRF1;GF14, GRF12;GF14, GRF5;GF14, GRF7	Encodes a 14-3-3 protein. This protein is reported to interact with the BZR1 transcription factor involved in brassinosteroid signaling and may affect the nucleocytoplasmic shuttling of BZR1;Encodes a member of the 14-3-3 gene family that is a lambda isoform (14-3-3&#955;). Interacts with APX3 (ascorbate peroxidase) and AKR2 , suggesting a role in mediating oxidative metabolism in stress response…
Wa8730a007g000220	1.28153	7.41745e-78	1.03414e-73	0.641	0.297
Wa8730a002g005420	1.27831	6.24639e-85	8.70871e-81	0.578	0.207	AT5G24760;AT1G64710;AT1G32780;AT5G42250		GroES-like zinc-binding dehydrogenase family protein;GroES-like zinc-binding dehydrogenase family protein;GroES-like zinc-binding dehydrogenase family protein;Zinc-binding alcohol dehydrogenase family protein
Wa8730a012g000820	1.23992	3.51833e-90	4.90525e-86	0.784	0.469	AT1G71950		SPI-1 is a member of the I9 inhibitor family. It is an inhibitor of SBT4.13 subtilase.
Wa8730a007g007580	1.20926	1.23278e-79	1.71874e-75	0.504	0.152
Wa8730a020g001670	1.16663	8.28133e-62	1.15458e-57	0.531	0.224	AT5G63400;AT4G25280;AT5G50370	ADK1;;	encodes a protein similar to adenylate kinase.;P-loop containing nucleoside triphosphate hydrolases superfamily protein;Adenylate kinase family protein
Wa8730a014g002860	1.16127	2.11787e-97	2.95273e-93	0.418	0.071	AT2G45190;AT1G08465;AT2G26580	AFO, FIL, YAB1;YAB2;YAB5	Encodes a member of the YABBY family of transcriptional regulators that is involved in abaxial cell type specification in leaves and fruits. YAB1 acts in a non-cell autonomous fashion within the meristem to affect phyllotactic patterning. The non-autonomous effect on the central region of the meristem is mediated through the activity if Lateral Suppressor (LAS).;Member of the YABBY family of Arab…
Wa8730a004g002520	1.15346	7.59899e-72	1.05945e-67	0.73	0.442	AT2G31490
Wa8730a013g005820	1.12868	5.29811e-71	7.38662e-67	0.462	0.14	AT3G54690	SETH3	Sugar isomerase (SIS) family protein
Wa8730a007g002110	1.11659	2.72197e-17	3.79497e-13	0.104	0.024
Wa8730a012g005020	1.09846	1.1951e-52	1.66621e-48	0.157	0.007	AT1G14290	SBH2	Encodes one of the two redundant sphingoid base hydroxylases (SBH). Involved in sphingolipid trihydroxy long-chain base (4-hydroxysphinganine) biosynthesis. Double mutants of SBHs were dwarfed and not able to progress from vegetative to reproductive growth.
Wa8730a013g005520	1.08565	8.22592e-82	1.14686e-77	0.399	0.078
Wa8730a020g002340	1.08331	1.95274e-84	2.72251e-80	0.868	0.687	AT1G22840	ATCYTC-A, CYTC-1	Encodes cytochrome c. Contains two site II (TGGGCC/T) elements, which interact with a TCP-domain transcription factor, and a downstream internal telomeric repeat, and are required for expression of the Cytc-1 gene. Promoter directs preferential expression in root and shoot meristems and in anthers.
Wa8730a015g004370	1.07901	1.10199e-53	1.5364e-49	0.683	0.435	AT3G01470;AT1G69780;AT2G22430	ATHB-1, ATHB1, HAT5, HB-1, HD-ZIP-1;ATHB13;ATHB6, HB6	Encodes a homeodomain leucine zipper class I (HD-Zip I) transcriptional activator involved in leaf development.;Encodes a homeodomain leucine zipper class I (HD-Zip I) protein.;Encodes a homeodomain leucine zipper class I (HD-Zip I) protein that is a target of the protein phosphatase ABI1 and regulates hormone responses in Arabidopsis.
Wa8730a013g001590	1.06605	1.39911e-58	1.95064e-54	0.575	0.28
Wa8730a006g004370	1.06176	2.5305e-82	3.52803e-78	0.257	0.017	AT2G41480;AT5G64120;AT5G66390;AT1G05260;AT2G34060;AT3G21770;AT5G15180;AT5G39580;AT3G03670;AT1G49570	AtPRX25, PRX25;AtPRX71, PRX71;PRX72;RCI3, RCI3A	Encodes a cationic cell-wall-bound peroxidase homolog that is involved in the lignification of cell walls.;encodes a cell wall bound peroxidase that is induced by hypo-osmolarity;Encodes a peroxidase that is involved in lignin biosynthesis.;Encodes a cold-inducible cationic peroxidase that is involved in the stress response. In response to low temperature, RCI3 transcripts accumulate in the aeria…
Wa8730a004g003200	1.02859	5.87271e-42	8.18774e-38	0.469	0.201
Wa8730a013g000340	1.01196	4.95362e-102	6.90633e-98	0.286	0.011
Wa8730a003g000340	1.01035	9.42544e-43	1.3141e-38	0.501	0.242	AT3G19450;AT4G34230;AT4G37970	ATCAD4, CAD, CAD-C, CAD4;ATCAD5, CAD-5, CAD5;ATCAD6, CAD6	Encodes a catalytically active cinnamyl alcohol dehydrogenase which uses p-coumaryl aldehyde as a preferred substrate. It can also use caffeyl, coniferyl and d-hydroxyconiferyl aldehydes as substrates.;Encodes a catalytically active cinnamyl alcohol dehydrogenase which uses p-coumaryl aldehyde as a preferred substrate. It can also use sinapyl, caffeyl, coniferyl and d-hydroxyconiferyl aldehydes a…
Wa8730a014g004370	1.0039	5.7491e-49	8.0154e-45	0.617	0.358	AT4G34700	AtCIB22, CIB22	Encodes the B22 subunit of eukaryotic mitochondrial Complex I. Mutation in the gene display pleiotropic phenotypes including shorter roots, smaller plants and delayed flowering. The mRNA is cell-to-cell mobile.
Wa8730a003g004980	1.00131	9.30352e-81	1.2971e-76	0.239	0.012	AT3G51590	LTP12	Encodes a member of the lipid transfer protein family. Proteins of this family are generally small (~9 kD), basic, expressed abundantly and contain eight Cys residues. The proteins can bind fatty acids and acylCoA esters and can transfer several different phospholipids. They are localized to the cell wall. The LTP12 promoter is active exclusively in the tapetum during the uninucleate microspore a…
Wa8730a008g001980	3.0541	1.0424e-16	1.45332e-12	0.111	0.029
Wa8730a012g002610	2.5044	1.22684e-189	1.71045e-185	0.547	0.043	AT5G04180	ACA3, ATACA3	alpha carbonic anhydrase 3
Wa8730a008g000460	1.99306	2.82118e-78	3.93329e-74	0.691	0.36
Wa8730a014g001120	1.86815	2.24261e-168	3.12664e-164	0.455	0.021
Wa8730a004g007210	1.69559	2.94208e-100	4.10184e-96	0.61	0.2	AT5G45650;AT4G15040		subtilase family protein;Subtilisin-like serine endopeptidase family protein
Wa8730a006g003620	1.69263	2.48368e-160	3.46274e-156	0.516	0.053	AT3G48780	ATSPT1, SPT1	Encodes one of the two LCB2 subunits (LCB2a and LCB2b) of serine palmitoyltransferase, an enzyme involved in sphingolipid biosynthesis. LCB2a and LCB2b are functional redundant. Double mutants are gametophytic lethal.
Wa8730a003g008800	1.55812	3.65694e-165	5.09851e-161	0.416	0.01	AT1G08465	YAB2	Member of the YABBY family of Arabidopsis proteins involved in the abaxial cell fate specification in lateral organs
Wa8730a016g000390	1.51729	6.45394e-192	8.99808e-188	0.497	0.018
Wa8730a013g002320	1.49422	1.55478e-90	2.16767e-86	0.405	0.075	AT4G12390;AT1G62770	PME1;	pectin methylesterase inhibitor 1;Plant invertase/pectin methylesterase inhibitor superfamily protein
Wa8730a004g006820	1.38803	1.69548e-53	2.36383e-49	0.705	0.437	AT5G44130	FLA13	FASCICLIN-like arabinogalactan protein 13 precursor
Wa8730a015g002300	1.29948	1.13612e-84	1.58399e-80	0.689	0.33	AT5G13500;AT5G25265;AT2G25260
Wa8730a018g003650	1.21577	3.76503e-83	5.24921e-79	0.333	0.045	AT1G02390;AT4G01950	ATGPAT2, GPAT2;ATGPAT3, GPAT3	Encodes a member of a family of proteins with glycerol-3-phosphate acyltransferase activity.;Encodes a member of a family of proteins with glycerol-3-phosphate acyltransferase activity.
Wa8730a006g007340	1.18486	3.05317e-75	4.25672e-71	0.358	0.067	AT1G17290;AT1G72330	AlaAT1;ALAAT2	Encodes for alanine aminotransferase (ALAAT1), involved in alanine catabolism during plants recovery from hypoxia;Encodes for alanine aminotransferase ALAAT2.
Wa8730a001g006470	1.17341	9.53437e-69	1.32928e-64	0.534	0.208	AT4G13290;AT5G57260;AT2G24180;AT1G13110;AT5G05260	CYP71A19;CYP71B10;CYP71B6;CYP71B7;CYP79A2	putative cytochrome P450;putative cytochrome P450;cytochrome P450 monooxygenase;member of CYP71B;Encodes cytochrome P450 CYP79A2.
Wa8730a002g007680	1.11988	3.69428e-68	5.15056e-64	0.682	0.336	AT5G23760		Copper transport protein family
Wa8730a012g003440	1.07136	1.35004e-52	1.88223e-48	0.531	0.225	AT1G53830;AT3G14310;AT4G33220;AT5G49180;AT5G20860;AT3G43270	ATPME2, PME2;ATPME3, OZS2, PME3;ATPME44, PME44	encodes a pectin methylesterase;encodes a pectin methylesterase, targeted by a cellulose binding protein (CBP) from the parasitic nematode Heterodera schachtii during parasitism.;pectin methylesterase 44;Encodes a putative pectin methylesterase. The gene is preferentially expressed in floral buds.;Plant invertase/pectin methylesterase inhibitor superfamily;Plant invertase/pectin methylesterase in…
Wa8730a005g004270	1.06802	4.26994e-47	5.95315e-43	0.667	0.422	AT1G53240;AT3G15020	mMDH1;mMDH2	mMDH1 encodes a mitochrondrial malate dehydrogenase. It is expressed at higher levels than the other mitochrondrial isoform mMDH2 (At3G15020) according to transcript and proteomic analyses.;Lactate/malate dehydrogenase family protein
Wa8730a019g001950	1.06451	9.6294e-63	1.34253e-58	0.65	0.356	AT3G12260		LYR family of Fe/S cluster biogenesis protein
Wa8730a008g005660	1.05956	5.04467e-42	7.03328e-38	0.141	0.011	AT1G11600	CYP77B1	member of CYP77B
Wa8730a009g005210	1.0414	5.26924e-67	7.34638e-63	0.428	0.12	AT5G20960;AT3G43600;AT1G50780	AAO1, AO1, AOalpha, AT-AO1, ATAO, AtAO1;AAO2, AO3, AOgamma, AtAO3, atAO-2;	Encodes aldehyde oxidase AA01.;Encodes an aldehyde oxidase. AAO2 does not appear to act on abscisic aldehyde in vitro but it is possible that it may function in abscisic acid biosynthesis when the activity of At2g27150 (AAO3), the primary abscisic aldehyde oxidase, is lost.;2Fe-2S ferredoxin-like superfamily protein
Wa8730a018g003750	1.03439	5.58008e-52	7.77974e-48	0.576	0.295	AT2G33040	ATP3	gamma subunit of Mt ATP synthase
Wa8730a009g005900	1.03127	3.31219e-62	4.61785e-58	0.658	0.341	AT1G49160	WNK7	Encodes a member of the WNK family (9 members in all) of protein kinases, the structural design of which is clearly distinct from those of other known protein kinases, such as receptor-like kinases and mitogen-activated protein kinases. Its
Wa8730a004g000480	1.01075	2.92507e-51	4.07814e-47	0.468	0.186

## Sheet: SC D DEGs
Dataset S7. Differentially Expressed Genes for Dusk Supercluster D
Genes showing significant differential expression (log2FC>1 & p_val_adj <0.05 & PCT1 > 10%) in the given supercluster versus all other cells in the dataset
PCT1: Percentage of cells within the Supercluster expressing the gene
PCT2: Percentage of cells outside the Supercluster expressing the gene
DEGs also of Dusk Supercluster D
Gene	Ave. Log2 FC	p Value	p Value Adj.	PCT1	PCT2	Arabidopsis orthologues	Arabidopsis gene names	Arabidopsis gene description
Wa8730a004g002910	3.42215	7.64906e-112	1.06643e-107	0.421	0.046	AT5G42180;AT4G25980;AT4G30170;AT4G17690;AT4G36430;AT5G19880;AT4G11290	PER64	Peroxidase superfamily protein;Peroxidase superfamily protein;Peroxidase family protein;Peroxidase superfamily protein;Peroxidase superfamily protein;Peroxidase superfamily protein;Peroxidase superfamily protein
Wa8730a001g000910	3.15235	2.42704e-87	3.38379e-83	0.499	0.11
Wa8730a015g001560	3.12463	1.89277e-123	2.6389e-119	0.691	0.174	AT5G48540		receptor-like protein kinase-related family protein
Wa8730a019g000680	2.94343	1.82881e-150	2.54972e-146	0.658	0.117	AT5G59820;AT2G37430;AT3G46090;AT2G28710;AT1G02030;AT5G03510;AT3G53600	AtZAT12, RHL41, ZAT12;ZAT11;ZAT7	Encodes a zinc finger protein involved in high light and cold acclimation. Overexpression of this putative transcription factor increases the expression level of 9 cold-responsive genes and represses the expression level of 15 cold-responsive genes, including CBF genes. Also, lines overexpressing this gene exhibits a small but reproducible increase in freeze tolerance. Because of the repression o…
Wa8730a016g003310	2.72268	5.46101e-102	7.61374e-98	0.501	0.088	AT3G14310;AT4G33220;AT1G11580;AT4G02330;AT1G23200;AT5G20860;AT3G60730;AT1G02810;AT4G15980	ATPME3, OZS2, PME3;ATPME44, PME44;ATPMEPCRA, PMEPCRA;ATPMEPCRB, AtPME41, PME41	encodes a pectin methylesterase, targeted by a cellulose binding protein (CBP) from the parasitic nematode Heterodera schachtii during parasitism.;pectin methylesterase 44;methylesterase PCR A;Encodes a pectin methylesterase that is sensitive to chilling stress and brassinosteroid regulation.;Encodes a pectin methyl esterase involved in embryo development.;Plant invertase/pectin methylesterase in…
Wa8730a015g001570	2.64609	7.90691e-89	1.10238e-84	0.614	0.181	AT5G48540		receptor-like protein kinase-related family protein
Wa8730a014g001820	2.60759	3.99438e-122	5.56897e-118	0.708	0.193	AT1G74800;AT1G27120		Encodes a Golgi-localized hydroxyproline galactosyltransferase GALT5. Functions together with GALT2 as redundant GALTs that control AGP (arabinogalactan-proteins) O-glycosylation, which is essential for normal growth and development. Mutants display multiple phenotypes including reduced root hair growth.;Encodes a Golgi-localized hydroxyproline-O-galactosyltransferase.
Wa8730a010g006490	2.54071	1.84289e-116	2.56935e-112	0.89	0.445	AT4G28050;AT2G23810;AT4G30430	TET7;TET8;TET9	Member of TETRASPANIN family;Member of TETRASPANIN family;Member of TETRASPANIN family
Wa8730a002g003450	2.51441	8.18481e-106	1.14113e-101	0.623	0.156	AT2G35710;AT4G16600	PGSIP7;PGSIP8	Nucleotide-diphospho-sugar transferases superfamily protein;Nucleotide-diphospho-sugar transferases superfamily protein
Wa8730a007g007160	2.49333	1.15313e-71	1.6077e-67	0.424	0.093	AT1G35660
Wa8730a012g004810	2.47626	3.09899e-108	4.32062e-104	0.744	0.253	AT5G65110	ACX2, ATACX2	Encodes an acyl-CoA oxidase presumably involved in long chain fatty acid biosynthesis.
Wa8730a002g004460	2.45771	7.10789e-132	9.90982e-128	0.876	0.335	AT4G38580;AT1G71050;AT4G35060;AT5G66110	ATFP6, FP6, HIPP26;HIPP20;HIPP25;HIPP27	putative farnesylated protein (At4g38580) mRNA, complete;Heavy metal transport/detoxification superfamily protein ;Heavy metal transport/detoxification superfamily protein ;Heavy metal transport/detoxification superfamily protein
Wa8730a015g005970	2.45592	2.74659e-89	3.8293e-85	0.614	0.192
Wa8730a013g001140	2.44746	2.86586e-81	3.99559e-77	0.793	0.444	AT5G47120;AT4G17580	ATBI-1, ATBI1, BI-1, BI1	Encodes BI-1, a homolog of mammalian Bax inhibitor 1. Functions as an attenuator of biotic and abiotic types of cell death. Bax-induced cell death can be downregulated by ectopically expressing AtBI in planta.;Bax inhibitor-1 family protein
Wa8730a019g002370	2.43262	6.05935e-39	8.44794e-35	0.584	0.33	AT4G15610;AT3G06390		Uncharacterised protein family (UPF0497);Uncharacterised protein family (UPF0497)
Wa8730a005g003350	2.41076	3.36749e-124	4.69495e-120	0.625	0.124	AT1G52245;AT3G16120	NA	NA;Dynein light chain type 1 family protein
Wa8730a002g001220	2.40256	7.43991e-86	1.03727e-81	0.612	0.185	AT5G52640;AT4G24190;AT5G56030	ATHS83, ATHSP90.1, AtHsp90-1, HSP81-1, HSP81.1, HSP83, HSP90.1;AtHsp90-7, AtHsp90.7, HSP90.7, SHD;AtHsp90.2, ERD8, HSP81-2, HSP81.2, HSP90.2	Encodes a cytosolic heat shock protein AtHSP90.1. AtHSP90.1 interacts with disease resistance signaling components SGT1b and RAR1 and is required for RPS2-mediated resistance.;encodes an ortholog of GRP94, an ER-resident HSP90-like protein and is involved in regulation of meristem size and organization. Single and double mutant analyses suggest that SHD may be required for the correct folding and…
Wa8730a010g005650	2.39971	4.82939e-104	6.73314e-100	0.755	0.284	AT3G19940		Encodes a hexose-H(+) symporter that catalyzes the high-affinity uptake of glucose, galactose and mannose that is induced under low-glucose conditions in pollen tubes.
Wa8730a020g000110	2.39759	2.22722e-118	3.10519e-114	0.501	0.071	AT1G71960;AT2G36380;AT1G66950	ABCG25, ATABCG25;ABCG34, ATPDR6, PDR6;ABCG39, ATPDR11, PDR11	Encodes a plasma membrane localized ABC transporter involved in abscisic acid transport and responses.;pleiotropic drug resistance 6;Encodes a plasma membrane-localized ABC transporter. Confers tolerance to herbicide paraquat.
Wa8730a011g005230	2.34766	8.93142e-98	1.24522e-93	0.667	0.196	AT4G31800;AT1G80840;AT2G25000	ATWRKY18, WRKY18;ATWRKY40, WRKY40;ATWRKY60, WRKY60	Pathogen-induced transcription factor. Binds W-box sequences in vitro. Forms protein complexes with itself and with WRKY40 and WRKY60. Constitutive expression of WRKY18 enhanced resistance to P. syringae, but its coexpression with WRKY40 or WRKY60 made plants more susceptible to both P. syringae and B. cinerea. WRKY18, WRKY40, and WRKY60 have partially redundant roles in response to the hemibiotr…
Wa8730a008g005470	2.33561	1.78363e-78	2.48674e-74	0.893	0.571	AT5G54500;AT4G36750;AT4G27270	FQR1	Encodes a flavin mononucleotide-binding flavodoxin-like quinone reductase that is a primary auxin-response gene.;Quinone reductase family protein;Quinone reductase family protein
Wa8730a010g001420	2.32219	2.20286e-90	3.07123e-86	0.614	0.172
Wa8730a009g002950	2.2771	4.52117e-64	6.30342e-60	0.311	0.048	AT2G38870		Predicted to encode a PR (pathogenesis-related) peptide that belongs to the PR-6 proteinase inhibitor family. Six putative PR-6-type protein encoding genes are found in Arabidopsis: At2g38900, At2g38870, At5g43570, At5g43580, At3g50020 and At3g46860.
Wa8730a001g010360	2.27397	4.53865e-97	6.32778e-93	0.482	0.085
Wa8730a005g005110	2.24886	2.7041e-114	3.77006e-110	0.444	0.051	AT5G42830		HXXXD-type acyl-transferase family protein
Wa8730a007g000980	2.2166	2.96916e-71	4.13961e-67	0.603	0.213	AT3G01770;AT5G14270;AT3G27260;AT5G63320	ATBET10, BET10;ATBET9, BET9;GTE8;NPX1	bromodomain and extraterminal domain protein 10;bromodomain and extraterminal domain protein 9;Kinase like protein with similarity to yeast BDF1 and human RING3 protein, which have two bromodomains GTE8 has a single bromodomain;Encodes NPX1 (Nuclear Protein X1), a nuclear factor regulating abscisic acid responses.
Wa8730a015g004680	2.19803	1.09936e-88	1.53272e-84	0.634	0.197	AT3G28340;AT1G13250;AT1G24170;AT1G70090	GATL10, GolS8;GATL3;GATL8, LGT9;GATL9, LGT8	Encodes a protein with putative galacturonosyltransferase activity.;Encodes a protein with putative galacturonosyltransferase activity.;Encodes a protein with putative galacturonosyltransferase activity.;Encodes a protein with putative galacturonosyltransferase activity.
Wa8730a011g004200	2.17737	8.99967e-72	1.25473e-67	0.449	0.101
Wa8730a007g004510	2.13406	4.3157e-63	6.01694e-59	0.675	0.331	AT1G28200;AT5G13200	FIP1	VirF-interacting protein FIP1;Encodes a protein with unknown function that is involved in hormone mediated regulation of seed germination/dormancy.
Wa8730a019g000760	2.13264	2.04481e-102	2.85087e-98	0.529	0.102	AT5G03540;AT3G55150;AT2G39380;AT3G09520;AT1G07725;AT5G59730;AT2G28650	ATEXO70A1, EXO70A1;ATEXO70H1, EXO70H1;ATEXO70H2, EXO70H2;ATEXO70H4, EXO70H4;ATEXO70H6, EXO70H6;ATEXO70H7, EXO70H7;ATEXO70H8, EXO70H8	AtEXO70A1 is a member of EXO70 gene family, putative exocyst subunits, conserved in land plants. Arabidopsis thaliana contains 23 putative EXO70 genes, which can be classified into nine clusters on the phylogenetic tree;A member of EXO70 gene family, putative exocyst subunits, conserved in land plants. Arabidopsis thaliana contains 23 putative EXO70 genes, which can be classified into eight clust…
Wa8730a001g006690	2.13035	2.90766e-107	4.05386e-103	0.749	0.239	AT2G40180;AT2G30020;AT1G07160	ATHPP2C5, PP2C5	Encodes PP2C5, a member of the PP2C family phosphatases. PP2C5 acts as a MAPK phosphatase that positively regulates seed germination, stomatal closure and ABA-inducible gene expression.;Encodes AP2C1. Belongs to the clade B of the PP2C-superfamily. Acts as a MAPK phosphatase that negatively regulates MPK4 and MPK6.;Protein phosphatase 2C family protein
Wa8730a014g005470	2.12763	2.57853e-83	3.59499e-79	0.523	0.126	AT5G66050		Wound-responsive family protein
Wa8730a014g001210	2.12104	1.81259e-78	2.52712e-74	0.54	0.152	AT2G03450;AT1G13900	ATPAP9, PAP9;PAP2	purple acid phosphatase 9;Encodes a dual-localized acid phosphatase (mitochondria and chloroplast) that modulates carbon metabolism.
Wa8730a003g001330	2.10293	9.11377e-94	1.27064e-89	0.612	0.157	AT4G37850;AT2G22750		basic helix-loop-helix (bHLH) DNA-binding superfamily protein;basic helix-loop-helix (bHLH) DNA-binding superfamily protein
Wa8730a013g001840	2.08987	5.22957e-80	7.29107e-76	0.512	0.13	AT2G46620		P-loop containing nucleoside triphosphate hydrolases superfamily protein
Wa8730a005g006290	2.07118	1.88979e-67	2.63475e-63	0.306	0.042	AT2G21490	LEA	dehydrin LEA
Wa8730a001g006070	2.06338	4.80387e-78	6.69755e-74	0.645	0.245	AT3G10940	LSF2	Encodes a protein with a predicted dual-specificity phosphatase domain, similar to the glucan phosphorylases SEX4 and LSF1, however, it lacks the carbohydrate binding domain present in those proteins. Has phosphoglucan phosphatase activity. It binds to starch and specifically hydrolyzes phosphate from the C3-position.
Wa8730a001g003830	2.05037	4.6312e-82	6.45682e-78	0.54	0.141	AT3G16720;AT2G47560;AT4G15975	ATL2, TL2	RING-H2 protein induced after exposure to chitin or inactivated crude cellulase preparations.;RING/U-box superfamily protein;RING/U-box superfamily protein
Wa8730a008g005080	2.03169	2.11196e-48	2.9445e-44	0.289	0.058	AT4G21215
Wa8730a010g004450	2.00818	5.44523e-71	7.59173e-67	0.427	0.09
Wa8730a005g003750	2.00393	3.94203e-41	5.49598e-37	0.438	0.167	AT3G25780	AOC3	Encodes allene oxide cyclase, one of the enzymes involved in jasmonic acid biosynthesis. One of four genes in Arabidopsis that encode this enzyme. mRNA expression is upregulated in senescing leaves. Note: Nomenclature for Arabidopsis allene oxide cyclase 3 (AOC3, AT3G25780) gene is based on Stenzel et al. 2003 Plant Molecular Biology 51:895-911. AOC3 (AT3G25780) is also referred to as AOC2 in He …
Wa8730a003g004240	1.96641	3.3882e-82	4.72383e-78	0.573	0.155	AT2G41870;AT3G57540		Remorin family protein;Remorin family protein
Wa8730a005g006600	1.93877	7.70751e-35	1.07458e-30	0.656	0.462	AT3G03270;AT5G14680;AT3G58450		HRU1 is a hypoxia induced universal stress protein. It exists as two splice variants with AT3G03270.2 , which contains a putative dimerization domain, the predominant transcript found under anoxia. It is induced by RAP2.12. Subcellular localization is dynamic; under anoxia the localization of HRU1 shifts from cytoplasm to the plasma membrane.;Adenine nucleotide alpha hydrolases-like superfamily p…
Wa8730a003g000840	1.93849	1.09158e-57	1.52188e-53	0.452	0.135	AT5G66650;AT4G36820;AT2G23790;AT5G42610		Protein of unknown function (DUF607);Protein of unknown function (DUF607);Protein of unknown function (DUF607);Protein of unknown function (DUF607)
Wa8730a001g007370	1.93371	3.31491e-77	4.62165e-73	0.653	0.235	AT4G31550;AT2G24570	ATWRKY11, WRKY11;ATWRKY17, WRKY17	member of WRKY Transcription Factor; Group II-d; negative regulator of basal resistance to Pseudomonas syringae.;member of WRKY Transcription Factor; Group II-d; negative regulator of basal resistance to Pseudomonas syringae.
Wa8730a012g001430	1.92943	9.29023e-37	1.29524e-32	0.259	0.061	AT5G63450;AT3G48520;AT1G34540;AT5G08250	CYP94B1;CYP94B3;CYP94D1	member of CYP94B;member of CYP94B;member of CYP94D;Cytochrome P450 superfamily protein
Wa8730a016g001550	1.89249	5.77629e-60	8.0533e-56	0.631	0.28	AT1G35140;AT5G64260;AT5G09440;AT4G08950	EXL1, PHI-1;EXL2;EXL4;EXO	At1g35140 (At1g35140/T32G9_32) mRNA, complete cds;EXORDIUM like 2;EXORDIUM like 4;Phosphate-responsive 1 family protein
Wa8730a012g004170	1.87334	1.25116e-63	1.74437e-59	0.463	0.132	AT1G78720;AT2G34250;AT1G29310		SecY protein transport family protein;SecY protein transport family protein;SecY protein transport family protein
Wa8730a007g006300	1.86287	4.81609e-82	6.71459e-78	0.314	0.032	AT2G18193;AT3G50940;AT3G28580		P-loop containing nucleoside triphosphate hydrolases superfamily protein;P-loop containing nucleoside triphosphate hydrolases superfamily protein;P-loop containing nucleoside triphosphate hydrolases superfamily protein
Wa8730a014g000450	1.85357	9.23356e-58	1.28734e-53	0.576	0.232	AT1G49560;AT4G37180		Homeodomain-like superfamily protein;myb family transcription factor, contains Pfam domain, PF00249: Myb-like DNA-binding domain l; also isolated as a putative cytoskeletal protein in a yeast screen
Wa8730a008g003990	1.84608	1.57383e-18	2.19423e-14	0.496	0.343	AT2G32240
Wa8730a018g001940	1.83733	1.51731e-75	2.11543e-71	0.457	0.098	AT2G41010;AT3G56880	ATCAMBP25, CAMBP25	Encodes a novel calmodulin binding protein whose gene expression is induced by dehydration and ionic (salt) and non-ionic (mannitol) osmotic stress. Lines over-expressing this gene are more sensitive and anti-sense lines are more tolerant to osmotic stress, suggesting this gene may be a negative regulator of response to osmotic stress.;VQ motif-containing protein
Wa8730a019g000660	1.83705	2.7589e-67	3.84645e-63	0.366	0.067	AT5G59820;AT2G37430;AT2G28710;AT1G02030;AT5G03510;AT3G46070;AT3G53600	AtZAT12, RHL41, ZAT12;ZAT11	Encodes a zinc finger protein involved in high light and cold acclimation. Overexpression of this putative transcription factor increases the expression level of 9 cold-responsive genes and represses the expression level of 15 cold-responsive genes, including CBF genes. Also, lines overexpressing this gene exhibits a small but reproducible increase in freeze tolerance. Because of the repression o…
Wa8730a016g001540	1.82677	3.74906e-41	5.22693e-37	0.493	0.205	AT1G35140;AT5G64260;AT5G09440;AT4G08950	EXL1, PHI-1;EXL2;EXL4;EXO	At1g35140 (At1g35140/T32G9_32) mRNA, complete cds;EXORDIUM like 2;EXORDIUM like 4;Phosphate-responsive 1 family protein
Wa8730a007g002940	1.82347	3.59578e-47	5.01324e-43	0.306	0.066	AT4G24960;AT5G50720;AT2G42820	ATHVA22D, HVA22D;ATHVA22E, HVA22E;HVA22F	Homologous to a eukaryote specific ABA- and stress-inducible gene first isolated from barley. Groups in one subfamily with ATHVA22E. Along with other members of the ATHVA22 family, it may be involved in regulation of autophagy during development.;Encodes one of five HVA22 homologs in Arabidopsis. HVA22 is an ABA- and stress-inducible gene first isolated from barley. Members of this gene family ha…
Wa8730a018g000270	1.81776	1.52473e-67	2.12577e-63	0.603	0.206	AT3G11410;AT1G07430;AT5G59220;AT2G29380	AHG3, ATPP2CA, PP2CA;AIP1, AtAIP1, HAI2, HON;HAI1, SAG113;HAI3	Encodes protein phosphatase 2C. Negative regulator of ABA signalling. Expressed in seeds during germination. mRNA up-regulated by drought and ABA.;Encodes a member of the group A protein phosphatase 2C (PP2C) family that is responsible for negatively regulating seed dormancy.;Encodes a member of the PP2C family (Clade A protein phosphatases type 2C). Functions as a negative regulator of osmotic s…
Wa8730a015g006070	1.81709	3.07398e-34	4.28575e-30	0.399	0.154
Wa8730a017g003480	1.80426	5.39152e-70	7.51686e-66	0.744	0.35	AT5G03380;AT2G28090;AT2G36950		Heavy metal transport/detoxification superfamily protein ;Heavy metal transport/detoxification superfamily protein ;Heavy metal transport/detoxification superfamily protein
Wa8730a019g001830	1.79875	1.2428e-116	1.73271e-112	0.956	0.538	AT1G01720;AT1G52890;AT4G27410	ANAC002, ATAF1;ANAC019, NAC019;ANAC072, RD26	Belongs to a large family of putative transcriptional activators with NAC domain. Transcript level increases in response to wounding and abscisic acid. ATAF1 attentuates ABA signaling and sythesis. Mutants are hyposensitive to ABA.;encodes a NAC transcription factor whose expression is induced by drought, high salt, and abscisic acid. This gene binds to ERD1 promoter in vitro.;Encodes a NAC trans…
Wa8730a005g008260	1.77364	2.98946e-30	4.16791e-26	0.457	0.23	AT1G70770;AT1G23170		Protein of unknown function DUF2359, transmembrane;Protein of unknown function DUF2359, transmembrane
Wa8730a005g004220	1.76208	5.44457e-86	7.59081e-82	0.424	0.069	AT4G01070;AT1G01420;AT5G26310	GT72B1, UGT72B1;UGT72B3;UGT72E3	the glycosyltransferase (UGT72B1) is involved in metabolizing xenobiotica (chloroaniline and chlorophenole). Comparison between wild type and knock-out mutant demonstrates the central role of this gene for metabolizing chloroaniline but significantly less for chlorophenole. The glucosyltransferase preferred UDP-xylose over UDP-glucose indicating its (additional) functioning as a xylosyltransferas…
Wa8730a002g003960	1.74855	8.12714e-54	1.13309e-49	0.259	0.038	AT5G37690;AT5G41890;AT1G75890		SGNH hydrolase-type esterase superfamily protein;GDSL-motif esterase/acyltransferase/lipase. Enzyme group with broad substrate specificity that may catalyze acyltransfer or hydrolase reactions with lipid and non-lipid substrates.;GDSL-motif esterase/acyltransferase/lipase. Enzyme group with broad substrate specificity that may catalyze acyltransfer or hydrolase reactions with lipid and non-lipid …
Wa8730a015g003250	1.73518	2.9989e-23	4.18107e-19	0.35	0.148	AT3G30842;AT1G15520	ABCG38, ATPDR10, PDR10;ABCG40, ATABCG40, ATPDR12, PDR12	pleiotropic drug resistance 10;ABC transporter family involved in ABA transport and resistance to lead. Localizes to plasma membrane. Upregulated by lead. Expressed in leaves, flowers, stomata and roots.
Wa8730a010g005120	1.7351	3.07458e-54	4.28657e-50	0.642	0.308	AT4G30600		signal recognition particle receptor alpha subunit family protein
Wa8730a001g005110	1.73344	2.02638e-66	2.82518e-62	0.636	0.258	AT2G33480;AT3G15170;AT3G29035;AT5G18270;AT5G39610;AT3G04060;AT3G12977	ANAC041, NAC041;ANAC054, ATNAC1, CUC1;ANAC059, ATNAC3, NAC3, ORS1;ANAC087;ANAC092, ATNAC2, ATNAC6, NAC2, NAC6, ORE1;NAC046, anac046;	NAC domain containing protein 41;Encodes a transcription factor involved in shoot apical meristem formation and auxin-mediated lateral root formation. The gene is thought not to be involved in stress responses (NaCl, auxins, ethylene). <i>Cuc</i> mutant was first recognized at the heart stage, where embryos lacking two distinct bulges of cotyledonary primordia were observed.;Encodes a protein wit…
Wa8730a004g008480	1.72993	2.47383e-63	3.44901e-59	0.766	0.385	AT3G24500	ATMBF1C, MBF1C	One of three genes in A. thaliana encoding multiprotein bridging factor 1, a highly conserved transcriptional coactivator. May serve as a bridging factor between a bZIP factor and TBP. Its expression is specifically elevated in response to pathogen infection, salinity, drought, heat, hydrogen peroxide, and application of abscisic acid or salicylic acid. Constitutive expression enhances the tolera…
Wa8730a001g011310	1.70601	5.23712e-59	7.30159e-55	0.521	0.166	AT5G02500;AT3G12580;AT3G09440	AT-HSC70-1, AtHsp70-1, HSC70, HSC70-1, HSP70-1;ATHSP70, HSP70;	encodes a member of heat shock protein 70 family.;heat shock protein 70;Heat shock protein 70 (Hsp 70) family protein
Wa8730a020g001680	1.69056	1.61315e-56	2.24906e-52	0.314	0.058	AT1G17420;AT1G67560	ATLOX3, LOX3;ATLOX6, LOX6	Lipoxygenase;PLAT/LH2 domain-containing lipoxygenase family protein
Wa8730a010g006210	1.67504	4.42644e-54	6.17134e-50	0.43	0.123	AT2G24580		FAD-dependent oxidoreductase family protein
Wa8730a004g007490	1.6641	4.9693e-71	6.9282e-67	0.873	0.556	AT3G24530		AAA-type ATPase family protein / ankyrin repeat family protein
Wa8730a007g006910	1.65988	7.20773e-78	1.0049e-73	0.78	0.382	AT1G01720;AT5G63790;AT5G08790;AT1G77450	ANAC002, ATAF1;ANAC102, NAC102;ATAF2, anac081;NAC032, anac032	Belongs to a large family of putative transcriptional activators with NAC domain. Transcript level increases in response to wounding and abscisic acid. ATAF1 attentuates ABA signaling and sythesis. Mutants are hyposensitive to ABA.;Encodes a member of the NAC family of transcription factors. ANAC102 appears to have a role in mediating response to low oxygen stress (hypoxia) in germinating seedlin…
Wa8730a018g001290	1.65645	1.10546e-34	1.54123e-30	0.449	0.18	AT2G40340;AT2G38340;AT5G05410;AT3G11020;AT5G18450	AtERF48, DREB2C;DREB19;DREB2, DREB2A;DREB2, DREB2B;	Encodes a member of the DREB subfamily A-2 of ERF/AP2 transcription factor family. The protein contains one AP2 domain. There are eight members in this subfamily including DREB2A AND DREB2B that are involved in response to drought.;encodes a member of the DREB subfamily A-2 of ERF/AP2 transcription factor family. The protein contains one AP2 domain. There are eight members in this subfamily inclu…
Wa8730a010g000800	1.64782	1.91247e-52	2.66637e-48	0.416	0.119	AT4G26080;AT5G57050;AT1G72770;AT1G17550	ABI1, AtABI1;ABI2, AtABI2;AtHAB1, HAB1;AtHAB2, HAB2	Involved in abscisic acid (ABA) signal transduction. Negative regulator of ABA promotion of stomatal closure.;Encodes a protein phosphatase 2C and is involved in ABA signal transduction. Binds fibrillin preprotein in vitro and in vivo.;mutant has ABA hypersensitive inhibition of seed germination; Protein Phosphatase 2C; regulates the activation of the Snf1-related kinase OST1 by abscisic acid.;Pr…
Wa8730a015g002550	1.63657	2.13577e-38	2.97769e-34	0.388	0.137	AT1G42990	ATBZIP60, BZIP60	AtbZIP60 consists of a bZIP DNA binding domain followed by a putative transmembrane domain. GFP fusions containing the first 260 amino acids (AtbZIP60deltaC) are nuclear-localized. AtbZIP60 is upregulated by the addition of tunicamycin (ER stress response inductor), DTT (inhibitor of disulfide bond formation) and azetin-2-carboxylate (proline analog perturbing protein structure). Upon ER stress t…
Wa8730a003g006290	1.62564	4.61684e-67	6.43679e-63	0.548	0.173	AT1G78230;AT3G17920		Outer arm dynein light chain 1 protein;Outer arm dynein light chain 1 protein
Wa8730a017g002000	1.62121	3.89665e-17	5.4327e-13	0.515	0.401	AT4G12030;AT4G22840	BASS5, BAT5	Required for the biosynthesis of methionine-derived glucosinolates. Involved in the transport of 2-keto acids between chloroplasts and the cytosol.;Sodium Bile acid symporter family
Wa8730a007g008470	1.61782	1.12118e-28	1.56314e-24	0.372	0.153	AT5G42100;AT2G27500;AT4G34480;AT4G18340;AT2G16230	ATBG_PPAP, BG_PPAP	encodes a plasmodesmal (Pd)-associated membrane protein involved in plasmodesmal callose degradation, i.e. beta-1,3-glucanase (EC 3.2.1.39), and functions in the gating of Pd;Glycosyl hydrolase superfamily protein;O-Glycosyl hydrolases family 17 protein;Glycosyl hydrolase superfamily protein;O-Glycosyl hydrolases family 17 protein
Wa8730a002g001010	1.61367	2.04447e-50	2.85041e-46	0.391	0.111	AT1G01570		Protein of unknown function (DUF604)
Wa8730a004g000410	1.60148	2.46437e-65	3.43582e-61	0.694	0.29	AT1G53170;AT3G23240;AT1G04370;AT2G31230	ATERF-8, ATERF8, ERF8;ATERF1, ERF1;ATERF14, ERF14;ATERF15, ERF15	encodes a member of the ERF (ethylene response factor) subfamily B-1 of ERF/AP2 transcription factor family (ATERF-8). The protein contains one AP2 domain. There are 15 members in this subfamily including ATERF-3, ATERF-4, ATERF-7, and leafy petiole.;encodes a member of the ERF (ethylene response factor) subfamily B-3 of ERF/AP2 transcription factor family (ERF1). The protein contains one AP2 dom…
Wa8730a010g003440	1.59767	1.75779e-64	2.45071e-60	0.689	0.282	AT3G49940;AT1G67100;AT3G02550;AT1G68510	LBD38;LBD40;LBD41;LBD42	LOB domain-containing protein 38;LOB domain-containing protein 40;LOB domain-containing protein 41;LOB domain-containing protein 42
Wa8730a016g001560	1.5873	1.73782e-37	2.42287e-33	0.565	0.285	AT1G35140;AT5G64260;AT5G09440;AT4G08950	EXL1, PHI-1;EXL2;EXL4;EXO	At1g35140 (At1g35140/T32G9_32) mRNA, complete cds;EXORDIUM like 2;EXORDIUM like 4;Phosphate-responsive 1 family protein
Wa8730a014g004040	1.56962	2.13126e-56	2.9714e-52	0.358	0.08	AT5G15730;AT4G00300;AT2G28970;AT5G24010	AtCRLK2, CRLK2	Protein kinase superfamily protein;AT4G00300 has been split into two loci based on new cDNA evidence provided by Aleksander Riise Hansen of University of Copenhagen: AT4G00300.2 becomes AT4G00300.1; a new locus AT4G00295 is created. See comments field for AT4G00295 annotation.;Leucine-rich repeat protein kinase family protein;Protein kinase superfamily protein
Wa8730a015g000860	1.5608	9.83728e-69	1.37151e-64	0.697	0.27	AT5G48070;AT2G18800;AT4G30270;AT4G25810;AT5G57550	ATXTH20, XTH20;ATXTH21, XTH21;MERI-5, MERI5B, SEN4, XTH24;XTH23, XTR6;XTH25, XTR3	putative xyloglucan endotransglycosylase/hydrolase, expressed primarily in the stele of mature non-elongating regions of both the main and the lateral root. Is expressed in lateral root primordia but expression ceases after lateral root begins to grow.;xyloglucan endotransglucosylase/hydrolase 21;encodes a protein similar to endo xyloglucan transferase in sequence. It is also very similar to BRU1…
Wa8730a010g003610	1.52831	1.07743e-65	1.50215e-61	0.377	0.071
Wa8730a003g005740	1.52249	7.32276e-34	1.02094e-29	0.129	0.013	AT3G46860;AT5G43570		Predicted to encode a PR (pathogenesis-related) peptide that belongs to the PR-6 proteinase inhibitor family. Six putative PR-6-type protein encoding genes are found in Arabidopsis: At2g38900, At2g38870, At5g43570, At5g43580, At3g50020 and At3g46860.;Predicted to encode a PR (pathogenesis-related) peptide that belongs to the PR-6 proteinase inhibitor family. Six putative PR-6-type protein encodin…
Wa8730a015g000790	1.50828	7.07017e-42	9.85723e-38	0.625	0.301	AT5G48070;AT2G18800;AT4G30270;AT4G25810;AT5G57550	ATXTH20, XTH20;ATXTH21, XTH21;MERI-5, MERI5B, SEN4, XTH24;XTH23, XTR6;XTH25, XTR3	putative xyloglucan endotransglycosylase/hydrolase, expressed primarily in the stele of mature non-elongating regions of both the main and the lateral root. Is expressed in lateral root primordia but expression ceases after lateral root begins to grow.;xyloglucan endotransglucosylase/hydrolase 21;encodes a protein similar to endo xyloglucan transferase in sequence. It is also very similar to BRU1…
Wa8730a008g002350	1.48804	2.87743e-55	4.01171e-51	0.303	0.055	AT5G11540	AtGulLO3, GulLO3	Encodes a homolog of rat L-gulono-1,4-lactone (L-GulL) oxidase that is involved in the biosynthesis of L-ascorbic acid.
Wa8730a006g000980	1.47193	2.76316e-48	3.85239e-44	0.567	0.23	AT3G22120;AT4G15160;AT1G62500	CWLP	cell wall-plasma membrane linker protein homolog (CWLP);Bifunctional inhibitor/lipid-transfer protein/seed storage 2S albumin superfamily protein;Bifunctional inhibitor/lipid-transfer protein/seed storage 2S albumin superfamily protein
Wa8730a013g005360	1.46882	2.34579e-59	3.27051e-55	0.504	0.16	AT3G23920	AtBAM1, BAM1, BMY7, TR-BAMY	Encodes a chloroplast beta-amylase. Is necessary for leaf starch breakdown in the absence of BAM3.
Wa8730a004g003130	1.46607	8.99092e-23	1.25351e-18	0.529	0.32	AT3G24540	AtPERK3, PERK3	Encodes a member of the proline-rich extensin-like receptor kinase (PERK) family. This family consists of 15 predicted receptor kinases (PMID: 15653807).
Wa8730a017g003290	1.45433	2.12586e-21	2.96388e-17	0.309	0.13	AT4G04955	ALN, ATALN	Encodes an allantoinase which is involved in allantoin degradation and assimilation. Gene expression was induced when allantoin was added to the medium. The insertion mutant, ataln m2-1, did not grow well on the MS medium where allantoin, instead of ammonium nitrate, was supplied.
Wa8730a015g003240	1.45343	1.73487e-27	2.41875e-23	0.642	0.405	AT3G30842;AT1G15520	ABCG38, ATPDR10, PDR10;ABCG40, ATABCG40, ATPDR12, PDR12	pleiotropic drug resistance 10;ABC transporter family involved in ABA transport and resistance to lead. Localizes to plasma membrane. Upregulated by lead. Expressed in leaves, flowers, stomata and roots.
Wa8730a006g001290	1.44782	3.19084e-18	4.44867e-14	0.245	0.096	AT2G32210;AT3G22240		;
Wa8730a001g012190	1.42826	2.67445e-31	3.72872e-27	0.287	0.088	AT5G01100;AT3G54100;AT2G37980	FRB1	O-fucosyltransferase family protein;O-fucosyltransferase family protein;O-fucosyltransferase family protein
Wa8730a017g002860	1.42102	2.36457e-24	3.29669e-20	0.43	0.228	AT4G02600;AT5G65970;AT2G39200;AT1G11310;AT2G17480	ATMLO1, MLO1;ATMLO10, MLO10;ATMLO12, MLO12;ATMLO2, MLO2, PMR2;ATMLO8, MLO8	A member of a large family of seven-transmembrane domain proteins specific to plants, homologs of the barley mildew resistance locus o (MLO) protein. The Arabidopsis genome contains 15 genes encoding MLO proteins, with localization in plasma membrane. Phylogenetic analysis revealed four clades of closely-related AtMLO genes. ATMLO1 belongs to the clade II, with ATMLO13 and ATMLO15. The gene is ex…
Wa8730a004g006020	1.41344	1.70622e-38	2.37881e-34	0.43	0.169	AT1G29395	COR413-TM1, COR413IM1, COR414-TM1	Integral membrane protein in the inner envelope of chloroplasts. Provide freezing tolerance. Expression is induced by short-term cold-treatment, water deprivation, and abscisic acid treatment.
Wa8730a011g002000	1.39043	3.51357e-52	4.89862e-48	0.325	0.069
Wa8730a005g005240	1.38832	5.53486e-29	7.7167e-25	0.672	0.457	AT5G42050		DCD (Development and Cell Death) domain protein
Wa8730a007g006500	1.3877	1.36267e-47	1.89984e-43	0.474	0.167
Wa8730a011g005910	1.38245	2.48773e-64	3.46839e-60	0.65	0.236	AT5G57123;AT4G29905;AT5G10695		;;
Wa8730a005g001590	1.36911	8.86145e-43	1.23546e-38	0.515	0.202	AT5G12020;AT5G51440	HSP17.6II	17.6 kDa class II heat shock protein;HSP20-like chaperones superfamily protein
Wa8730a011g003790	1.36331	1.91173e-38	2.66533e-34	0.543	0.247	AT5G57620;AT5G67300;AT4G37260	AtMYB36, MYB36;ATMYB44, ATMYBR1, MYB44, MYBR1;ATMYB73, MYB73	Encodes a putative transcription factor (MYB36).;Member of the R2R3 factor MYB gene family involved in mediating plant responses to a variety of abiotic stimiuli.;Member of the R2R3 factor gene family.
Wa8730a001g011840	1.34997	6.44772e-42	8.98941e-38	0.298	0.07	AT3G11410;AT1G07430;AT5G59220;AT2G29380	AHG3, ATPP2CA, PP2CA;AIP1, AtAIP1, HAI2, HON;HAI1, SAG113;HAI3	Encodes protein phosphatase 2C. Negative regulator of ABA signalling. Expressed in seeds during germination. mRNA up-regulated by drought and ABA.;Encodes a member of the group A protein phosphatase 2C (PP2C) family that is responsible for negatively regulating seed dormancy.;Encodes a member of the PP2C family (Clade A protein phosphatases type 2C). Functions as a negative regulator of osmotic s…
Wa8730a003g004130	1.34932	1.07361e-55	1.49682e-51	0.372	0.084	AT5G11420;AT2G41810;AT3G08030		Protein of unknown function, DUF642;Protein of unknown function, DUF642;The mRNA of this gene is expressed in viable seeds. Its detection in a dry seed lot has potential for use as a molecular marker for germination performance as absence of expression correlates with decreased germination.
Wa8730a010g000100	1.34601	7.95227e-55	1.10871e-50	0.231	0.028	AT3G16340;AT3G53480	ABCG29, ATPDR1, AtABCG29, PDR1;ABCG37, ATPDR9, PDR9, PIS1	Encodes a p-coumaryl alcohol exporter involved in lignin biosynthesis.;Negative regulator of auxin polar transport inhibitors. ABCG37 regulates auxin distribution and homeostasis in roots by excluding IBA from the root apex, but does not act directly in basipetal transport. ABCG37 and ABCG36 act redundantly at outermost root plasma membranes and, transport IBA out of the cells.
Wa8730a004g008440	1.34164	1.42904e-49	1.99237e-45	0.38	0.1
Wa8730a006g001110	1.34007	8.41648e-32	1.17343e-27	0.237	0.057	AT4G15160;AT1G62500;AT3G22142		Bifunctional inhibitor/lipid-transfer protein/seed storage 2S albumin superfamily protein;Bifunctional inhibitor/lipid-transfer protein/seed storage 2S albumin superfamily protein;Encodes a Protease inhibitor/seed storage/LTP family protein
Wa8730a006g000870	1.33414	1.56835e-36	2.1866e-32	0.256	0.059	AT1G79350	EMB1135	Encodes the Arabidopsis thaliana orthologue of metazoan Strawberry notch, a highly conserved co-activator of the developmental regulator Notch. It mediates stress-induced chromatin memory by modulating nucleosome occupancy by interacting with chromatin remodeling proteins of the ISWI and SWI/SNF classes.
Wa8730a014g001980	1.33332	8.17303e-23	1.13948e-18	0.331	0.144
Wa8730a003g001710	1.31496	2.15972e-39	3.01109e-35	0.444	0.168	AT3G18830;AT4G36670;AT2G16120;AT2G20780;AT2G18480;AT1G19450	ATPLT5, ATPMT5, PMT5;AtPLT6, AtPMT6, PLT6, PMT6;ATPMT1, PMT1	This gene encodes a plasma membrane-localized polyol/cyclitol/monosaccharide-H+-symporter. The symporter is able to catalyze the energy-dependent membrane passage of a wide range of linear polyols (three to six carbon backbone), of cyclic polyols (<i>myo</i>-inositol), and of numerous monosaccharides, including pyranose ring-forming and furanose ring-forming hexoses and pentoses. This gene belong…
Wa8730a009g006540	1.30887	1.74486e-40	2.43268e-36	0.493	0.208	AT1G69260;AT1G13740;AT3G29575	AFP1;AFP2;AFP3	ABI five binding protein;Encodes a member of a small plant-specific gene family whose members interact with ABI5 and appear to be involved in mediating stress responses. AFP2 mutants affect a number of ABA mediated processes such as germination and response to osmotic and sugar stress. AFP2 nuclear localization is stress dependent.;ABI five binding protein 3
Wa8730a017g002670	1.3068	1.33473e-29	1.86088e-25	0.248	0.069	AT2G17890;AT4G36070;AT5G66210;AT5G24430	CPK16;CPK18;CPK28;	member of Calcium Dependent Protein Kinase;member of Calcium Dependent Protein Kinase;member of Calcium Dependent Protein Kinase;Calcium-dependent protein kinase (CDPK) family protein
Wa8730a009g006210	1.30529	5.01683e-38	6.99446e-34	0.322	0.094	AT1G27770;AT3G57330;AT4G37640;AT2G22950	ACA1, PEA1;ACA11;ACA2;ACA7	Encodes a chloroplast envelope Ca2+-ATPase with an N-terminal autoinhibitor.;Lesion mimic phenotype when mutation in the gene is combined with a mutation in ACA4. Lesion mimic phenotype of double knockout can be suppressed by nutritional supplements that increase anion levels (e.g. 15 mM Nitrate, Chloride, or Phosphate);Encodes a calmodulin-regulated Ca(2+)-pump located in the endoplasmic reticul…
Wa8730a014g003980	1.28279	5.91694e-24	8.2494e-20	0.372	0.172
Wa8730a001g003140	1.28224	4.89117e-39	6.81928e-35	0.705	0.447	AT5G18670	BAM9, BMY3	putative beta-amylase BMY3 (BMY3)
Wa8730a012g000770	1.27605	3.81718e-24	5.32191e-20	0.383	0.177	AT5G08720		Encodes PIN2 PROMOTER BINDING PROTEIN 1 (PPP1), an evolutionary conserved plant-specific DNA binding protein that acts on transcription of PIN genes. Also named as HCF145. Mutations in HCF145 have reduced level of the tricistronic psaA-psaB-rps (small-subunit ribosomal protein)14 mRNA which encodes for the major subunits of the photosystem I (PSI). HCF145 binds to the 5'UTR of PSAA via a novel TM…
Wa8730a001g005100	1.27009	1.43642e-19	2.00265e-15	0.402	0.221	AT5G04930	ALA1	Encodes a putative aminophospholipid translocase (p-type ATPase) involved in chilling response.
Wa8730a003g004430	1.26722	3.47239e-74	4.8412e-70	0.209	0.009	AT1G55020;AT3G22400	ATLOX1, LOX1;ATLOX5, LOX5	lipoxygenase, a defense gene conferring resistance Xanthomonas campestris;Encodes lipoxygenase5 (LOX5). LOX5 activity in roots facilitates green peach aphid colonization of Arabidopsis foliage by promoting green peach aphid feeding from sieve element and water consumption from xylem.
Wa8730a012g000410	1.23843	8.02162e-35	1.11837e-30	0.377	0.132	AT2G27350	OTLD1	Encodes an otubain-like histone deubiquitinase involved in chromatin modification and regulation of plant gene expression.
Wa8730a015g000740	1.22998	2.99392e-47	4.17413e-43	0.336	0.082	AT4G31550;AT2G24570	ATWRKY11, WRKY11;ATWRKY17, WRKY17	member of WRKY Transcription Factor; Group II-d; negative regulator of basal resistance to Pseudomonas syringae.;member of WRKY Transcription Factor; Group II-d; negative regulator of basal resistance to Pseudomonas syringae.
Wa8730a001g000900	1.22206	1.14908e-55	1.60204e-51	0.19	0.014
Wa8730a007g000380	1.2196	8.33752e-38	1.16242e-33	0.562	0.268	AT3G44260;AT5G22250	AtCAF1a, CAF1a;AtCAF1b, CAF1b	Encodes one of the homologs of the yeast CCR4-associated factor 1: AT3G44260 (CAF1a), AT5G22250 (CAF1b). Has mRNA deadenylation activity. Also plays a role in plant defense responses.;Encodes one of the homologs of the yeast CCR4-associated factor 1: AT3G44260 (CAF1a), AT5G22250 (CAF1b). Has mRNA deadenylation activity. Also plays a role in plant defense responses.
Wa8730a003g005730	1.20106	2.56309e-32	3.57345e-28	0.171	0.028	AT3G46860;AT5G43570		Predicted to encode a PR (pathogenesis-related) peptide that belongs to the PR-6 proteinase inhibitor family. Six putative PR-6-type protein encoding genes are found in Arabidopsis: At2g38900, At2g38870, At5g43570, At5g43580, At3g50020 and At3g46860.;Predicted to encode a PR (pathogenesis-related) peptide that belongs to the PR-6 proteinase inhibitor family. Six putative PR-6-type protein encodin…
Wa8730a009g001650	1.19768	3.95874e-36	5.51927e-32	0.22	0.043	AT2G29890;AT2G41740;AT3G57410	ATVLN1, VLN1;ATVLN2, VLN2;ATVLN3, VLN3	Encodes a ubiquitously expressed villin-like protein, whose mRNA may be alternatively processed. Villin belongs to a superfamily of actin binding proteins called the villin/gelsolin family. Animal villins are involved in actin binding. VLN1 protein co-localizes with actin filaments in several assays. VLN1 binds and bundles F-actin in a calcium-independent manner. It does not nucleate, cap or seve…
Wa8730a001g002610	1.19583	8.60429e-19	1.19961e-14	0.449	0.272	AT4G15530	PPDK	Encodes a dual-targeted protein believed to act as a pyruvate, orthophosphate dikinase. These enzymes are normally associated with C4 photosynthesis which does not occur in Arabidopsis. However, PPDK may play a role in remobilizing nitrogen during leaf senescence in Arabidopsis. The product of the long transcript (.1 gene model) was shown to be targeted to the chloroplast, whereas the shorter tra…
Wa8730a011g003230	1.19288	1.88414e-16	2.62686e-12	0.116	0.026	AT1G73680	ALPHA, alpha-DOX2	Encodes an alpha dioxygenase. Recombinant protein catalyzes the conversion of a wide range of fatty acids into 2(R)-hydroperoxy derivatives.
Wa8730a003g005710	1.18723	7.96126e-19	1.10996e-14	0.295	0.128	AT4G08580		microfibrillar-associated protein-related
Wa8730a014g006110	1.18356	2.59003e-26	3.61102e-22	0.322	0.125	AT1G14370;AT4G35600;AT2G17220;AT3G55450;AT1G76360;AT1G18160;AT5G03320	APK2A, Kin1, PBL2;CST, CX32, Kin4;Kin3;PBL1	Encodes protein kinase APK2a.;plant-type connexin (gap junction-type protein), a component of plasmodesmata;Encodes a putative serine/threonine-specific protein kinase kin3. Protein is N-myristoylated.;PBS1-like 1;Protein kinase superfamily protein;Protein kinase superfamily protein;Protein kinase superfamily protein
Wa8730a006g001280	1.17974	6.63638e-19	9.25245e-15	0.331	0.148	AT2G32210;AT3G22240		;
Wa8730a017g001840	1.1748	6.10163e-31	8.5069e-27	0.361	0.132	AT5G51460;AT4G12430;AT4G22590	ATTPPA, TPPA;TPPF;TPPG	homologous to the C-terminal part of microbial trehalose-6-phosphate phosphatases;Haloacid dehalogenase-like hydrolase (HAD) superfamily protein;Haloacid dehalogenase-like hydrolase (HAD) superfamily protein
Wa8730a005g006550	1.14562	7.08766e-43	9.88162e-39	0.606	0.292	AT3G27880;AT5G14730		Protein of unknown function (DUF1645);
Wa8730a016g004010	1.1406	1.14662e-42	1.59862e-38	0.275	0.058
Wa8730a003g006350	1.14026	3.04789e-29	4.24936e-25	0.24	0.064	AT5G09410;AT2G22300;AT1G77680	CAMTA1, EICBP.B;CAMTA3, SR1	calmodulin-binding protein, similar to another ethylene-upregulated calmodulin-binding protein ER1 GI:11612392 from (Nicotiana tabacum);Encodes a putative CAM binding transcription factor. Loss of function mutations show enhanced resistance to fungal and bacterial pathogens suggesting that CAMTA functions to suppress defense responses.;Ribonuclease II/R family protein
Wa8730a020g001370	1.10417	1.26006e-10	1.75678e-06	0.501	0.394	AT2G33480;AT5G13180	ANAC041, NAC041;ANAC083, NAC083, VNI2	NAC domain containing protein 41;Encodes a NAC domain transcription factor that interacts with VND7 and negatively regulates xylem vessel formation.
Wa8730a001g002190	1.08244	4.19998e-21	5.85562e-17	0.421	0.212	AT5G19120;AT1G03220		Eukaryotic aspartyl protease family protein;Eukaryotic aspartyl protease family protein
Wa8730a012g005080	1.07978	1.90112e-21	2.65054e-17	0.565	0.405	AT5G09930;AT5G64840;AT4G33460;AT2G22120	ABCF2;ABCF5, ATGCN5, GCN5;ABCI10, ATNAP13, EMB2751;	member of GCN subfamily;member of GCN subfamily;member of NAP subfamily;RING/FYVE/PHD zinc finger superfamily protein
Wa8730a010g004820	1.0773	3.02822e-35	4.22194e-31	0.149	0.017	AT5G15730;AT5G47850;AT4G31250	AtCRLK2, CRLK2;CCR4	Protein kinase superfamily protein;CRINKLY4 related 4;Leucine-rich repeat protein kinase family protein
Wa8730a018g001130	1.06723	7.67017e-18	1.06938e-13	0.325	0.159	AT2G38280	ATAMPD, FAC1	Encodes a protein with in vitro AMP deaminase activity that is involved in embryogenesis. Homozygous mutant embryos fail to develop past the zygote stage.
Wa8730a002g005830	1.0647	2.29949e-14	3.20595e-10	0.185	0.069	AT1G76520;AT5G65980;AT2G17500;AT1G20925		Auxin efflux carrier family protein;Auxin efflux carrier family protein;Auxin efflux carrier family protein;Auxin efflux carrier family protein
Wa8730a005g008320	1.06042	2.30002e-30	3.20669e-26	0.209	0.047	AT1G26150;AT1G70740;AT1G49100;AT1G29740	AtPERK10, PERK10	Encodes a member of the proline-rich extensin-like receptor kinase (PERK) family. This family consists of 15 predicted receptor kinases (PMID: 15653807).;Protein kinase superfamily protein;Leucine-rich repeat protein kinase family protein;Leucine-rich repeat transmembrane protein kinase
Wa8730a013g004490	1.05813	1.30112e-33	1.81403e-29	0.917	0.802	AT2G31570;AT3G63080;AT1G63460	ATGPX2, GPX2;ATGPX5, GPX5, MEE42;ATGPX8, GPX8	glutathione peroxidase GPx;Encodes glutathione peroxidase.;Encodes GPX8 (glutathione peroxidase 8). Involved in the suppression of oxidative damages in nucleus and cytosol. The mRNA is cell-to-cell mobile.
Wa8730a004g008620	1.05318	7.2696e-18	1.01353e-13	0.168	0.05	AT1G15460;AT4G32510;AT5G25430	ATBOR4, BOR4	Encodes a efflux-type boron transporter. Over-expression improved plant growth under B toxic conditions.;HCO3- transporter family;HCO3- transporter family
Wa8730a001g011500	1.05235	2.22224e-40	3.09824e-36	0.281	0.065	AT2G29735;AT3G55430;AT4G34480;AT2G39640;AT3G46570	NA	NA;O-Glycosyl hydrolases family 17 protein;O-Glycosyl hydrolases family 17 protein;glycosyl hydrolase family 17 protein;Glycosyl hydrolase superfamily protein
Wa8730a011g005620	1.04953	4.45426e-18	6.21013e-14	0.259	0.106	AT2G24720;AT4G31710;AT5G11180	ATGLR2.2, GLR2.2;ATGLR2.4, AUG8, GLR2.4;ATGLR2.6, GLR2.6	member of Putative ligand-gated ion channel subunit family;member of Putative ligand-gated ion channel subunit family;member of Putative ligand-gated ion channel subunit family
Wa8730a009g000380	1.04786	8.4669e-15	1.18046e-10	0.256	0.118	AT3G53880;AT2G37770	AKR4C11;AKR4C9, ChlAKR	NAD(P)-linked oxidoreductase superfamily protein;Encodes an NADPH-dependent aldo-keto reductase that can act on a wide variety of substrates in vitro including saturated and unsaturated aldehydes, steroids, and sugars. GFP-tagged AKR4C9 localizes to the chloroplast where it may play a role in detoxifying reactive carbonyl compounds that threaten to impair the photosynthetic process. Transcript le…
Wa8730a005g002190	1.04344	1.71725e-27	2.3942e-23	0.229	0.062	AT4G33050;AT3G13600;AT3G52870;AT5G57010;AT2G26190	AtIQM1, EDA39, IQM1	Encodes a calmodulin-binding protein involved in stomatal movement.;calmodulin-binding family protein;IQ calmodulin-binding motif family protein;calmodulin-binding family protein;calmodulin-binding family protein
Wa8730a006g002900	1.0405	1.90669e-07	0.00265831	0.369	0.271	AT3G25230;AT5G48570	ATFKBP62, FKBP62, ROF1;ATFKBP65, FKBP65, ROF2	Encodes a a high molecular weight member of the FK506 binding protein (FKBP) family. It has three FKBP12-like domains, tetratricopeptide repeats, and a putative calmodulin binding domain. Modulates thermotolerance by interacting with HSP90.1 and affecting the accumulation of HsfA2-regulated sHSPs.;Encodes one of the 36 carboxylate clamp (CC)-tetratricopeptide repeat (TPR) proteins (Prasad 2010, P…
Wa8730a008g003440	1.03122	9.32927e-13	1.30069e-08	0.375	0.237	AT1G30640;AT3G23310;AT2G20470		Protein kinase family protein;AGC (cAMP-dependent, cGMP-dependent and protein kinase C) kinase family protein;AGC (cAMP-dependent, cGMP-dependent and protein kinase C) kinase family protein
Wa8730a006g001210	1.03092	3.3897e-27	4.72592e-23	0.157	0.028	AT2G32210;AT3G22240		;
Wa8730a015g004620	1.02122	2.69333e-16	3.75503e-12	0.196	0.07
Wa8730a005g008430	1.01315	1.43397e-44	1.99924e-40	0.854	0.597	AT1G67090;AT5G38430	RBCS1A;RBCS1B	Encodes a member of the Rubisco small subunit (RBCS) multigene family: RBCS1A (At1g67090), RBCS1B (At5g38430), RBCS2B (At5g38420), and RBCS3B (At5g38410). Functions to yield sufficient Rubisco content for leaf photosynthetic capacity.;Encodes a member of the Rubisco small subunit (RBCS) multigene family: RBCS1A (At1g67090), RBCS1B (At5g38430), RBCS2B (At5g38420), and RBCS3B (At5g38410).
Wa8730a011g005220	1.00919	2.81554e-33	3.92543e-29	0.78	0.572	AT2G25090;AT4G30960;AT5G58380;AT5G45820;AT5G25110;AT5G10930	AtCIPK16, CIPK16, SnRK3.18;ATCIPK6, CIPK6, SIP3, SNRK3.14;CIPK10, PKS2, SIP1, SNRK3.8;CIPK20, PKS18, SnRK3.6;CIPK25, SnRK3.25;CIPK5, SnRK3.24	Encodes a member of the SNF1-related kinase (SnRK) gene family (SnRK3.18), which has also been reported as a member of the CBL-interacting protein kinases (CIPK16).;Encodes CBL-interacting protein kinase 6 (CIPK6). Required for development and salt tolerance.;Encodes a CBL-interacting protein kinase with similarity to SOS protein kinase.;Encodes a CBL-interacting serine/threonine protein kinase c…
Wa8730a016g001520	1.9973	4.67168e-59	6.51326e-55	0.625	0.278	AT1G35140;AT5G64260;AT5G09440;AT4G08950	EXL1, PHI-1;EXL2;EXL4;EXO	At1g35140 (At1g35140/T32G9_32) mRNA, complete cds;EXORDIUM like 2;EXORDIUM like 4;Phosphate-responsive 1 family protein
Wa8730a005g004060	1.84327	5.02106e-52	7.00036e-48	0.38	0.099	AT5G53460	GLT1	NADH-dependent glutamate synthase
Wa8730a002g004680	1.73272	3.4377e-69	4.79284e-65	0.457	0.11	AT5G38280;AT1G75800;AT5G24620;AT1G77700;AT2G17860;AT4G36010;AT4G38670;AT1G20030	PR5K	putative receptor serine/threonine kinase PR5K (PR5K) mRNA, PR5-like receptor kinase;Pathogenesis-related thaumatin superfamily protein;Pathogenesis-related thaumatin superfamily protein;Pathogenesis-related thaumatin superfamily protein;Pathogenesis-related thaumatin superfamily protein;Pathogenesis-related thaumatin superfamily protein;Pathogenesis-related thaumatin superfamily protein;Pathogen…
Wa8730a012g004920	1.56234	1.17428e-36	1.63718e-32	0.612	0.358	AT4G33500		Protein phosphatase 2C family protein
Wa8730a001g012130	1.55869	4.6877e-32	6.53559e-28	0.551	0.28	AT3G54040		PAR1 protein
Wa8730a014g001710	1.55017	2.5004e-54	3.48606e-50	0.298	0.053	AT5G59490;AT3G62040		Haloacid dehalogenase-like hydrolase (HAD) superfamily protein;Haloacid dehalogenase-like hydrolase (HAD) superfamily protein
Wa8730a003g006100	1.47828	3.31605e-09	4.62323e-05	0.074	0.217	AT1G68300		Adenine nucleotide alpha hydrolases-like superfamily protein
Wa8730a008g005750	1.46466	6.80231e-22	9.48378e-18	0.424	0.221	AT1G11260;AT1G50310;AT4G21480	ATSTP1, STP1;ATSTP9, STP9;STP12	Encodes a H+/hexose cotransporter.;sugar transporter 9;Putative sugar transporter. Expressed in nematode-induced root syncytia.
Wa8730a012g004660	1.46231	1.23943e-32	1.72802e-28	0.383	0.145
Wa8730a007g007600	1.44512	1.67314e-61	2.3327e-57	0.388	0.084	AT5G64700;AT3G18200;AT3G53210	UMAMIT21;UMAMIT4;UMAMIT6	nodulin MtN21-like transporter family protein;nodulin MtN21-like transporter family protein;nodulin MtN21-like transporter family protein
Wa8730a015g004220	1.4204	1.95261e-25	2.72232e-21	0.523	0.32	AT3G02360		6-phosphogluconate dehydrogenase family protein
Wa8730a010g000220	1.35115	1.54671e-06	0.0215642	0.325	0.244	AT3G24503	ALDH1A, ALDH2C4, REF1	Arabidopsis thaliana aldehyde dehydrogenase AtALDH1a mRNA. a sinapaldehyde dehydrogenase catalyzes both the oxidation of coniferylaldehyde and sinapaldehyde forming ferulic acid and sinapic acid, respectively
Wa8730a007g002230	1.34392	6.34045e-45	8.83985e-41	0.298	0.067	AT1G78560;AT3G25410		Sodium Bile acid symporter family;Sodium Bile acid symporter family
Wa8730a009g001190	1.34285	5.79947e-49	8.08562e-45	0.821	0.594	AT5G01600;AT3G11050;AT3G56090;AT2G40300	ATFER1, FER1;ATFER2, FER2;ATFER3, FER3;ATFER4, FER4	Encodes a ferretin protein that is targeted to the chloroplast. Member of a Ferritin gene family. Gene expression is induced in response to iron overload and by nitric oxide. Expression of the gene is downregulated in the presence of paraquat, an inducer of photoxidative stress.;ferritin 2;Encodes FERRITIN 3, AtFER3. Ferritins are a class of 24-mer multi-meric proteins found in all kingdoms of li…
Wa8730a016g004470	1.3349	7.83479e-14	1.09233e-09	0.474	0.34	AT1G60420	AtNRX1, NRX1	Reduce transmission through pollen.
Wa8730a003g000100	1.31035	1.289e-29	1.79713e-25	0.408	0.172	AT5G10550;AT5G65630;AT1G17790	GTE2;GTE7;	This gene is predicted to encode a bromodomain-containing protein. A plant line expressing RNAi constructs targeted against GTE7 shows some resistance to agrobacterium-mediated root transformation.;This gene is predicted to encode a bromodomain-containing protein. Plant lines expressing RNAi constructs targeted against GTE7 show some resistance to agrobacterium-mediated root transformation.;DNA-b…
Wa8730a002g007620	1.30848	3.36527e-34	4.69186e-30	0.383	0.141	AT3G47080		Tetratricopeptide repeat (TPR)-like superfamily protein
Wa8730a002g005660	1.3003	5.74401e-39	8.0083e-35	0.264	0.06
Wa8730a011g003700	1.28702	3.34181e-18	4.65915e-14	0.449	0.279
Wa8730a009g000430	1.2408	1.38743e-33	1.93436e-29	0.298	0.089	AT2G39650		Protein of unknown function (DUF506)
Wa8730a015g001790	1.24026	3.60626e-84	5.02784e-80	0.948	0.642	AT1G80920	AtJ8, AtToc12, DJC22, J8, Toc12	A nuclear encoded soluble protein found in the chloroplast stroma.
Wa8730a009g003680	1.23237	1.74044e-26	2.42652e-22	0.46	0.237	AT2G41430	CID1, ERD15, LSR1	Encodes hydrophilic protein lacking Cys residues that is expressed in response to drought stress, light stress and treatment with plant-growth-promoting rhizobacteria (Paenibacillus polymyxa), possibly revealing a connection between responses to biotic and abiotic stress. Also identified as a CTC Interacting Domain (CID) protein in a yeast two hybrid screen using the PAB2 protein as bait. Contain…
Wa8730a004g008080	1.22946	1.76336e-38	2.45848e-34	0.185	0.026	AT5G12020	HSP17.6II	17.6 kDa class II heat shock protein
Wa8730a019g001080	1.22814	2.26127e-33	3.15266e-29	0.27	0.072	AT2G30250;AT2G38470;AT5G07100	ATWRKY25, WRKY25;ATWRKY33, WRKY33;WRKY26	member of WRKY Transcription Factor; Group I. Located in nucleus. Involved in response to various abiotic stresses - especially salt stress.;Member of the plant WRKY transcription factor family. Regulates the antagonistic relationship between defense pathways mediating responses to P. syringae and necrotrophic fungal pathogens. Located in nucleus. Involved in response to various abiotic stresses …
Wa8730a003g004640	1.2068	2.93661e-29	4.09422e-25	0.355	0.139	AT3G52970;AT1G74550	CYP76G1;CYP98A9	member of CYP76G;member of CYP98A
Wa8730a011g000090	1.205	5.56349e-34	7.75661e-30	0.275	0.073	AT4G19230;AT5G45340;AT5G36110	CYP707A1;CYP707A3;CYP716A1	Encodes a protein with ABA 8'-hydroxylase activity, involved in ABA catabolism. Member of the CYP707A gene family. CYP707A1 appears to play an important role in determining the ABA levels in dry seeds. Gene involved in postgermination growth. Overexpression of CYP707A1 leads to a decrease in ABA levels and a reduction in after-ripening period to break dormancy.;Encodes a protein with ABA 8'-hydro…
Wa8730a011g002350	1.2017	8.80666e-29	1.22782e-24	0.204	0.047	AT5G47120;AT4G17580	ATBI-1, ATBI1, BI-1, BI1	Encodes BI-1, a homolog of mammalian Bax inhibitor 1. Functions as an attenuator of biotic and abiotic types of cell death. Bax-induced cell death can be downregulated by ectopically expressing AtBI in planta.;Bax inhibitor-1 family protein
Wa8730a003g007810	1.19344	9.35904e-18	1.30484e-13	0.388	0.223	AT5G58375;AT5G18150;AT5G14602		Methyltransferase-related protein;Methyltransferase-related protein;
Wa8730a015g001600	1.18966	8.33122e-22	1.16154e-17	0.292	0.111	AT4G30280;AT5G48070;AT2G18800;AT4G25810;AT5G57550	ATXTH18, XTH18;ATXTH20, XTH20;ATXTH21, XTH21;XTH23, XTR6;XTH25, XTR3	Encodes a xyloglucan endotransglucosylase/hydrolase with only only the endotransglucosylase (XET; EC 2.4.1.207) activity towards xyloglucan and non-detectable endohydrolytic (XEH; EC 3.2.1.151) activity. Expressed in the mature or basal regions of both the main and lateral roots, but not in the tip of these roots where cell division occurs.;putative xyloglucan endotransglycosylase/hydrolase, expr…
Wa8730a011g005690	1.18334	5.86581e-13	8.17812e-09	0.187	0.076
Wa8730a005g004230	1.18025	1.60896e-43	2.24321e-39	0.262	0.051	AT1G64350	SEH1H	seh1-like protein
Wa8730a018g000340	1.16593	9.83209e-19	1.37079e-14	0.234	0.088	AT5G59570;AT3G46640;AT3G10760	BOA;LUX, PCL1	Encodes BOA (BROTHER OF LUX ARRHYTHMO), a component of the circadian clock. The mRNA is cell-to-cell mobile.;Encodes a myb family transcription factor with a single Myb DNA-binding domain (type SHAQKYF) that is unique to plants and is essential for circadian rhythms, specifically for transcriptional regulation within the circadian clock. LUX is required for normal rhythmic expression of multiple …
Wa8730a018g003980	1.15531	2.91812e-46	4.06844e-42	0.215	0.029	AT4G16230		GDSL-motif esterase/acyltransferase/lipase. Enzyme group with broad substrate specificity that may catalyze acyltransfer or hydrolase reactions with lipid and non-lipid substrates.
Wa8730a014g004410	1.143	1.52173e-43	2.1216e-39	0.758	0.458
Wa8730a005g006560	1.13814	2.97688e-33	4.15036e-29	0.262	0.069
Wa8730a016g004300	1.13812	7.766e-28	1.08274e-23	0.394	0.167	AT1G02305;AT4G16190		Encodes a capase involved in stress induced cell death.;Papain family cysteine protease
Wa8730a010g001960	1.13647	1.0354e-36	1.44356e-32	0.463	0.18	AT2G31090;AT2G20562		Encodes a signalling peptide influencing lateral organ separation.;Encodes a putative signalling peptide with similarity to TAX1. No known function has been demonstrated yet.
Wa8730a002g001840	1.13586	1.07531e-15	1.4992e-11	0.331	0.176	AT4G39090;AT3G49340;AT2G21430	RD19, RD19A	Similar to cysteine proteinases, induced by desiccation but not abscisic acid. Required for RRS1-R mediated resistance against Ralstonia solanacearum. Interacts with the R. solanacearum type III effector PopP2. RD19 associates with PopP2 to form a nuclear complex that is required for activation of the RRS1-Rmediated resistance response.;Cysteine proteinases superfamily protein;Papain family cyste…
Wa8730a001g000570	1.13218	6.09151e-57	8.49279e-53	0.264	0.037	AT1G02400;AT1G47990	ATGA2OX4, ATGA2OX6, DTA1, GA2OX6;ATGA2OX4, GA2OX4	Encodes a gibberellin 2-oxidase that acts on C19 gibberellins but not C20 gibberellins.;Encodes a gibberellin 2-oxidase that acts on C19 gibberellins. AtGA2OX4 expression is responsive to cytokinin and KNOX activities.
Wa8730a013g004060	1.13093	1.77194e-29	2.47044e-25	0.264	0.077	AT5G23210;AT5G08260;AT3G63470	SCPL34;scpl35;scpl40	serine carboxypeptidase-like 34;serine carboxypeptidase-like 35;serine carboxypeptidase-like 40
Wa8730a011g005580	1.12546	1.98337e-17	2.76522e-13	0.264	0.113	AT4G30370;AT5G42200	IDF1	RING/U-box superfamily protein;RING/U-box superfamily protein
Wa8730a011g004900	1.10863	7.72581e-12	1.07713e-07	0.408	0.277	AT5G56030;AT2G04030	AtHsp90.2, ERD8, HSP81-2, HSP81.2, HSP90.2;AtHsp90.5, AtHsp90C, CR88, EMB1956, HSP90.5, Hsp88.1	A member of heat shock protein 90 (HSP90) gene family. Expressed in all tissues and abundant in root apical meristem, pollen and tapetum. Expression is NOT heat-induced but induced by IAA and NaCl. Interacts with HsfA1d in the cytosol and the nucleus and negatively regulates HsfA1d. Did not bind to AtHsfA4c.;Encodes a chloroplast-targeted 90-kDa heat shock protein located in the stroma involved i…
Wa8730a012g004840	1.10538	1.70332e-31	2.37477e-27	0.427	0.177	AT1G78080;AT1G22190;AT2G22200;AT4G39780;AT5G65130;AT1G36060	AtWIND1, RAP2.4, WIND1;RAP2.4	Encodes a member of the DREB subfamily A-6 of ERF/AP2 transcription factor family (RAP2.4). The protein contains one AP2 domain. Role in mediating light and ethylene signaling.;The gene encodes a putative transcription factor belongings to the abiotic stress-associated DREB A-6 clade. The mRNA is cell-to-cell mobile.;encodes a member of the DREB subfamily A-6 of ERF/AP2 transcription factor famil…
Wa8730a011g003860	1.10318	2.88015e-21	4.0155e-17	0.523	0.333	AT4G22260	IM, IM1, PTOX	Similar to mitochondrial alternative oxidase. im mutants have a variegated phenotype and fail to differentiate chloroplasts in the majority of their cells under high light intensity continuous illumination. The white tissues of immutans accumulate phytoene, a non-colored C40 carotenoid intermediate. This suggests that immutans controls, either directly or indirectly, the activity of phytoene desa…
Wa8730a004g003870	1.10273	8.52325e-26	1.18831e-21	0.171	0.037
Wa8730a006g000510	1.10066	1.63225e-37	2.27568e-33	0.504	0.214	AT3G15210;AT3G20310;AT1G12980	ATERF-4, ATERF4, ERF4, RAP2.5;ATERF-7, ATERF7, ERF7;DRN, ESR1	Encodes a member of the ERF (ethylene response factor) subfamily B-1 of ERF/AP2 transcription factor family (ATERF-4). The protein contains one AP2 domain. Acts as a negative regulator of JA-responsive defense gene expression and resistance to the necrotrophic fungal pathogen Fusarium oxysporum and antagonizes JA inhibition of root elongation.;Encodes a member of the ERF (ethylene response factor…
Wa8730a001g003150	1.09615	1.68952e-29	2.35553e-25	0.358	0.131	AT5G18680;AT2G47900;AT1G47270;AT3G06380	AtTLP11, TLP11;AtTLP3, TLP3;AtTLP6, TLP6;ATTLP9, TLP9	Member of TLP family;Member of TLP family;Member of TLP family;Member of TLP family
Wa8730a015g001350	1.0875	4.41752e-49	6.1589e-45	0.149	0.008	AT4G28050;AT2G23810;AT4G30430	TET7;TET8;TET9	Member of TETRASPANIN family;Member of TETRASPANIN family;Member of TETRASPANIN family
Wa8730a014g005560	1.07946	1.04065e-15	1.45087e-11	0.331	0.171	AT4G35040;AT2G16770	bZIP19;bZIP23	Basic-region leucine zipper (bZIP19) transcription factor involved in the adaptation to zinc deficiency. Binds ZDRE motifs.;Basic-region leucine zipper (bZIP23) transcription factor involved in the adaptation to zinc deficiency. Binds ZDRE motifs.
Wa8730a006g005110	1.06431	6.13195e-15	8.54916e-11	0.311	0.161	AT5G07340		Calreticulin family protein
Wa8730a001g005860	1.05891	2.63651e-40	3.67582e-36	0.245	0.047	AT2G33050;AT1G58190;AT3G51740	AtRLP26, RLP26;AtRLP9, RLP9;IMK2	receptor like protein 26;receptor like protein 9;encodes a leucine-repeat receptor kinase expressed in inflorescence meristem. Locus association was made from performing sequence analysis with IMK3 (MRLK) whose locus association was provided by the authors.
Wa8730a015g002360	1.05733	4.17355e-26	5.81877e-22	0.482	0.254	AT4G32030
Wa8730a005g001580	1.05155	1.62745e-20	2.26899e-16	0.3	0.124	AT5G12020	HSP17.6II	17.6 kDa class II heat shock protein
Wa8730a002g004470	1.05123	1.28429e-16	1.79055e-12	0.325	0.168	AT1G20110		Encodes a protein that is localized to the peripheral membrane of late endosomal compartments. Involved in the regulation of mulitivesicular/prevacuolar compartment protein sorting. Loss of function mutations are embryo lethal. Regulates IRT1-dependent metal transport and metal homeostasis. The mRNA is cell-to-cell mobile.
Wa8730a013g004440	1.03893	1.85795e-18	2.59035e-14	0.54	0.384	AT5G23760;AT5G53880		Copper transport protein family;
Wa8730a003g002080	1.03752	1.23333e-35	1.7195e-31	0.796	0.554	AT5G67450;AT3G19580;AT5G43170;AT1G27730;AT3G49930;AT1G49900	AZF1, ZF1;AZF2, ZF2;AZF3, ZF3;STZ, ZAT10	Encodes zinc-finger protein. mRNA levels are elevated in response to low temperature, cold temperatures and high salt. The protein is localized to the nucleus and acts as a transcriptional repressor.;Encodes zinc finger protein. mRNA levels are upregulated in response to ABA, high salt, and mild dessication. The protein is localized to the nucleus and acts as a transcriptional repressor.;Encodes …
Wa8730a009g004010	1.0369	2.53828e-26	3.53887e-22	0.57	0.32	AT2G47260;AT5G49520;AT3G62340;AT5G13080	ATWRKY23, WRKY23;ATWRKY48, WRKY48;AtWRKY68, WRKY68;ATWRKY75, WRKY75	Encodes a member of WRKY Transcription Factor; Group I. Involved in nematode feeding site establishment.;Encodes WRKY48, a member of the WRKY Transcription Factor. WRKY48 is a stress- and pathogen-induced transcriptional activator that represses plant basal defense.;member of WRKY Transcription Factor; Group II-c;WRKY75 is one of several transcription factors induced during Pi deprivation. It is …
Wa8730a017g003160	1.03647	1.47822e-17	2.06094e-13	0.413	0.242
Wa8730a011g002740	1.03016	1.66545e-27	2.32197e-23	0.559	0.312
Wa8730a014g004960	1.02994	7.76002e-18	1.0819e-13	0.433	0.263	AT4G22690;AT4G12320;AT2G45580;AT3G61040;AT5G04630	CYP706A1;CYP706A6;CYP76C3;CYP76C7;CYP77A9	member of CYP706A;member of CYP706A;member of CYP76C;encodes a protein with cytochrome P450 domain;member of CYP77A
Wa8730a011g002170	1.02671	1.08985e-45	1.51946e-41	0.196	0.023
Wa8730a017g002450	1.02625	5.85142e-08	0.000815805	0.152	0.071	AT2G17840;AT3G51250;AT4G35985	ERD7	Identified as drought-inducible gene by differential hybridization. Upregulated by high light, drought, cold and salt stress determined by microarray analysis.;Senescence/dehydration-associated protein-related;Senescence/dehydration-associated protein-related
Wa8730a010g001140	1.0248	5.43877e-50	7.58273e-46	0.603	0.244	AT4G29190;AT2G25900;AT2G19810;AT1G03790;AT5G44260	AtC3H49, AtOZF2, AtTZF3, OZF2, TZF3;ATCTH, ATTZF1;AtOZF1, AtTZF2, OZF1, TZF2;AtTZF4, SOM, TZF4;AtTZF5, TZF5	Zinc finger C-x8-C-x5-C-x3-H type family protein;putative Cys3His zinc finger protein (ATCTH) mRNA, complete;Encodes Oxidation-related Zinc Finger 1 (OZF1), a plasma membrane protein involved in oxidative stress.;Encodes SOMNUS (SOM), a nucleus-localized CCCH-type zinc finger protein. SOM negatively regulates light-dependent seed germination downstream of PIL5 (AT2G20180).;Encodes a Tandem CCCH Z…
Wa8730a006g005680	1.024	2.84571e-11	3.9675e-07	0.331	0.203	AT1G22280;AT1G78200;AT1G34750	PAPP2C	Encodes a phytochrome-associated protein, PAPP2C (phytochrome-associated protein phosphatase type 2C). PAPP2C interacts in the nucleus with phyA (phytochrome A) and phyB. Functions as a regulator of phytochrome-interacting factor PIF3 by dephosphorylating phytochromes in the nucleus.;Protein phosphatase 2C family protein;Protein phosphatase 2C family protein
Wa8730a001g004200	1.02245	3.17805e-24	4.43084e-20	0.275	0.097	AT4G02075;AT1G02610	PIT1	RING/FYVE/PHD zinc finger superfamily protein;RING/FYVE/PHD zinc finger superfamily protein
Wa8730a017g003280	1.01954	1.10595e-17	1.54192e-13	0.237	0.091
Wa8730a006g000010	1.00403	8.66381e-23	1.20791e-18	0.223	0.067
Wa8730a015g004800	1.00043	4.62433e-11	6.44723e-07	0.264	0.143

## Sheet: SC A GO
Dataset S7. Enriched GO terms for Differentially Expressed Genes for Dusk Supercluster A
GO	Name	Ratio in Study	Ratio in Pop.	p Value	Depth	Study Count	p Value (BH-FDR)	Study Items
GO:0010025	wax biosynthetic process	14/218	48/13944	1.03456e-14	5	14	4.93933e-11	Wa8730a009g000590, Wa8730a011g004580, Wa8730a011g004700, Wa8730a011g004730, Wa8730a011g004850, Wa8730a011g005590, Wa8730a012g005240, Wa8730a013g005120, Wa8730a013g005140, Wa8730a014g005820, Wa8730a015g005080, Wa8730a015g005520, Wa8730a016g003000, Wa8730a018g002300
GO:0010166	wax metabolic process	14/218	49/13944	1.42858e-14	4	14	4.93933e-11	Wa8730a009g000590, Wa8730a011g004580, Wa8730a011g004700, Wa8730a011g004730, Wa8730a011g004850, Wa8730a011g005590, Wa8730a012g005240, Wa8730a013g005120, Wa8730a013g005140, Wa8730a014g005820, Wa8730a015g005080, Wa8730a015g005520, Wa8730a016g003000, Wa8730a018g002300
GO:1901570	fatty acid derivative biosynthetic process	14/218	51/13944	2.66064e-14	4	14	6.13277e-11	Wa8730a009g000590, Wa8730a011g004580, Wa8730a011g004700, Wa8730a011g004730, Wa8730a011g004850, Wa8730a011g005590, Wa8730a012g005240, Wa8730a013g005120, Wa8730a013g005140, Wa8730a014g005820, Wa8730a015g005080, Wa8730a015g005520, Wa8730a016g003000, Wa8730a018g002300
GO:1901568	fatty acid derivative metabolic process	14/218	61/13944	4.03773e-13	3	14	6.98022e-10	Wa8730a009g000590, Wa8730a011g004580, Wa8730a011g004700, Wa8730a011g004730, Wa8730a011g004850, Wa8730a011g005590, Wa8730a012g005240, Wa8730a013g005120, Wa8730a013g005140, Wa8730a014g005820, Wa8730a015g005080, Wa8730a015g005520, Wa8730a016g003000, Wa8730a018g002300
GO:0120251	hydrocarbon biosynthetic process	9/218	21/13944	1.18174e-11	4	9	1.63434e-08	Wa8730a001g011890, Wa8730a008g003940, Wa8730a011g004580, Wa8730a011g004700, Wa8730a011g004730, Wa8730a011g005590, Wa8730a013g005120, Wa8730a013g005140, Wa8730a018g002300
GO:0043446	cellular alkane metabolic process	7/218	12/13944	1.53694e-10	4	7	1.32849e-07	Wa8730a011g004580, Wa8730a011g004700, Wa8730a011g004730, Wa8730a011g005590, Wa8730a013g005120, Wa8730a013g005140, Wa8730a018g002300
GO:0043447	alkane biosynthetic process	7/218	12/13944	1.53694e-10	5	7	1.32849e-07	Wa8730a011g004580, Wa8730a011g004700, Wa8730a011g004730, Wa8730a011g005590, Wa8730a013g005120, Wa8730a013g005140, Wa8730a018g002300
GO:0006723	cuticle hydrocarbon biosynthetic process	7/218	12/13944	1.53694e-10	5	7	1.32849e-07	Wa8730a011g004580, Wa8730a011g004700, Wa8730a011g004730, Wa8730a011g005590, Wa8730a013g005120, Wa8730a013g005140, Wa8730a018g002300
GO:0120252	hydrocarbon metabolic process	9/218	27/13944	1.73693e-10	3	9	1.33454e-07	Wa8730a001g011890, Wa8730a008g003940, Wa8730a011g004580, Wa8730a011g004700, Wa8730a011g004730, Wa8730a011g005590, Wa8730a013g005120, Wa8730a013g005140, Wa8730a018g002300
GO:0080167	response to karrikin	12/218	68/13944	5.31158e-10	3	12	3.67296e-07	Wa8730a001g004860, Wa8730a003g002320, Wa8730a003g006990, Wa8730a006g005060, Wa8730a007g004410, Wa8730a007g008930, Wa8730a009g001620, Wa8730a009g001630, Wa8730a012g005240, Wa8730a015g004980, Wa8730a017g004030, Wa8730a018g000750
GO:0042335	cuticle development	8/218	30/13944	1.36669e-08	3	8	8.59152e-06	Wa8730a009g000590, Wa8730a011g004580, Wa8730a011g004700, Wa8730a011g004730, Wa8730a011g005590, Wa8730a013g005120, Wa8730a013g005140, Wa8730a018g002300
GO:0048235	pollen sperm cell differentiation	7/218	29/13944	2.41553e-07	4	7	0.000116191	Wa8730a011g004580, Wa8730a011g004700, Wa8730a011g004730, Wa8730a011g005590, Wa8730a013g005120, Wa8730a013g005140, Wa8730a018g002300
GO:0006629	lipid metabolic process	23/218	428/13944	2.52041e-07	3	23	0.000116191	Wa8730a006g002600, Wa8730a006g004490, Wa8730a008g000260, Wa8730a008g002540, Wa8730a009g000590, Wa8730a010g004870, Wa8730a011g004580, Wa8730a011g004700, Wa8730a011g004730, Wa8730a011g004850, Wa8730a011g005590, Wa8730a013g002080, Wa8730a013g005120, Wa8730a013g005140, Wa8730a015g005080, Wa8730a015g005520, Wa8730a016g001110, Wa8730a016g002030, Wa8730a017g002740, Wa8730a018g002300, Wa8730a018g003530, …
GO:0009813	flavonoid biosynthetic process	7/218	35/13944	9.60986e-07	4	7	0.000390895	Wa8730a001g004070, Wa8730a009g001620, Wa8730a010g002840, Wa8730a011g001270, Wa8730a015g004980, Wa8730a018g000750, Wa8730a019g003490
GO:0009812	flavonoid metabolic process	7/218	44/13944	4.85992e-06	3	7	0.00152756	Wa8730a001g004070, Wa8730a009g001620, Wa8730a010g002840, Wa8730a011g001270, Wa8730a015g004980, Wa8730a018g000750, Wa8730a019g003490
GO:0055046	microgametogenesis	7/218	44/13944	4.85992e-06	2	7	0.00152756	Wa8730a011g004580, Wa8730a011g004700, Wa8730a011g004730, Wa8730a011g005590, Wa8730a013g005120, Wa8730a013g005140, Wa8730a018g002300
GO:0042761	very long-chain fatty acid biosynthetic process	5/218	18/13944	6.47525e-06	9	5	0.0019468	Wa8730a006g004490, Wa8730a008g002540, Wa8730a009g000590, Wa8730a020g002750, Wa8730a020g002800
GO:1901576	organic substance biosynthetic process	40/218	1255/13944	1.21238e-05	3	40	0.00349316	Wa8730a001g000970, Wa8730a001g004070, Wa8730a001g010050, Wa8730a001g011890, Wa8730a001g012380, Wa8730a003g005060, Wa8730a003g005260, Wa8730a006g002600, Wa8730a006g004490, Wa8730a007g002540, Wa8730a007g008930, Wa8730a008g002540, Wa8730a008g003940, Wa8730a009g000590, Wa8730a009g001620, Wa8730a009g003340, Wa8730a010g002840, Wa8730a011g001270, Wa8730a011g004580, Wa8730a011g004700, Wa8730a011g004730, …
GO:0006633	fatty acid biosynthetic process	7/218	56/13944	2.50906e-05	8	7	0.00642599	Wa8730a006g004490, Wa8730a008g002540, Wa8730a009g000590, Wa8730a016g001110, Wa8730a018g003530, Wa8730a020g002750, Wa8730a020g002800
GO:0009058	biosynthetic process	40/218	1302/13944	2.97258e-05	2	40	0.00709528	Wa8730a001g000970, Wa8730a001g004070, Wa8730a001g010050, Wa8730a001g011890, Wa8730a001g012380, Wa8730a003g005060, Wa8730a003g005260, Wa8730a006g002600, Wa8730a006g004490, Wa8730a007g002540, Wa8730a007g008930, Wa8730a008g002540, Wa8730a008g003940, Wa8730a009g000590, Wa8730a009g001620, Wa8730a009g003340, Wa8730a010g002840, Wa8730a011g001270, Wa8730a011g004580, Wa8730a011g004700, Wa8730a011g004730, …
GO:0000038	very long-chain fatty acid metabolic process	5/218	24/13944	2.97561e-05	8	5	0.00709528	Wa8730a006g004490, Wa8730a008g002540, Wa8730a009g000590, Wa8730a020g002750, Wa8730a020g002800
GO:0009628	response to abiotic stimulus	35/218	1086/13944	3.51904e-05	2	35	0.00811138	Wa8730a001g003580, Wa8730a001g004070, Wa8730a001g004860, Wa8730a001g004980, Wa8730a001g011890, Wa8730a002g003100, Wa8730a002g009930, Wa8730a002g009950, Wa8730a003g002320, Wa8730a003g005060, Wa8730a003g005260, Wa8730a003g006530, Wa8730a003g006990, Wa8730a005g003480, Wa8730a006g004800, Wa8730a006g005060, Wa8730a007g004410, Wa8730a007g006900, Wa8730a007g008930, Wa8730a008g000260, Wa8730a008g004080, …
GO:0006631	fatty acid metabolic process	9/218	113/13944	6.91706e-05	7	9	0.0144944	Wa8730a006g004490, Wa8730a008g002540, Wa8730a009g000590, Wa8730a010g004870, Wa8730a016g001110, Wa8730a016g002030, Wa8730a018g003530, Wa8730a020g002750, Wa8730a020g002800
GO:0006084	acetyl-CoA metabolic process	3/218	6/13944	7.28089e-05	11	3	0.014808	Wa8730a001g000970, Wa8730a013g002080, Wa8730a018g003530
GO:0048232	male gamete generation	7/218	67/13944	8.13552e-05	4	7	0.0160735	Wa8730a011g004580, Wa8730a011g004700, Wa8730a011g004730, Wa8730a011g005590, Wa8730a013g005120, Wa8730a013g005140, Wa8730a018g002300
GO:0009416	response to light stimulus	18/218	418/13944	0.000101984	4	18	0.0195894	Wa8730a001g004070, Wa8730a002g003100, Wa8730a002g009930, Wa8730a002g009950, Wa8730a003g002320, Wa8730a003g005060, Wa8730a003g005260, Wa8730a003g006530, Wa8730a003g006990, Wa8730a007g004410, Wa8730a007g008930, Wa8730a010g004620, Wa8730a014g005820, Wa8730a015g004980, Wa8730a016g003000, Wa8730a017g004030, Wa8730a019g000700, Wa8730a019g003490
GO:0007276	gamete generation	7/218	75/13944	0.000167082	3	7	0.0312262	Wa8730a011g004580, Wa8730a011g004700, Wa8730a011g004730, Wa8730a011g005590, Wa8730a013g005120, Wa8730a013g005140, Wa8730a018g002300
GO:0022412	cellular process involved in reproduction in multicellular organism	7/218	76/13944	0.000181622	2	7	0.0330505	Wa8730a011g004580, Wa8730a011g004700, Wa8730a011g004730, Wa8730a011g005590, Wa8730a013g005120, Wa8730a013g005140, Wa8730a018g002300
GO:0030497	fatty acid elongation	3/218	8/13944	0.000199188	9	3	0.0353176	Wa8730a008g002540, Wa8730a009g000590, Wa8730a016g001110
GO:0006085	acetyl-CoA biosynthetic process	2/218	2/13944	0.000243317	12	2	0.0410375	Wa8730a001g000970, Wa8730a018g003530
GO:0044255	cellular lipid metabolic process	16/218	378/13944	0.000301483	4	16	0.0484827	Wa8730a006g002600, Wa8730a006g004490, Wa8730a008g000260, Wa8730a008g002540, Wa8730a009g000590, Wa8730a010g004870, Wa8730a011g004850, Wa8730a013g002080, Wa8730a015g005080, Wa8730a015g005520, Wa8730a016g001110, Wa8730a016g002030, Wa8730a017g002740, Wa8730a018g003530, Wa8730a020g002750, Wa8730a020g002800
GO:0043170	macromolecule metabolic process	11/218	2515/13944	2.03046e-08	3	11	1.17005e-05	Wa8730a001g004860, Wa8730a001g010900, Wa8730a001g012380, Wa8730a005g005630, Wa8730a007g007400, Wa8730a008g003940, Wa8730a008g004200, Wa8730a009g003340, Wa8730a015g003690, Wa8730a017g002740, Wa8730a019g003750
GO:0090304	nucleic acid metabolic process	1/218	1196/13944	1.22888e-07	5	1	6.53671e-05	Wa8730a009g003340
GO:0016070	RNA metabolic process	0/218	923/13944	5.9658e-07	6	0	0.000257834
GO:0006807	nitrogen compound metabolic process	18/218	2865/13944	1.08196e-06	2	18	0.000415654	Wa8730a001g000970, Wa8730a001g004860, Wa8730a001g010050, Wa8730a001g010900, Wa8730a005g005630, Wa8730a007g007400, Wa8730a007g008930, Wa8730a008g002540, Wa8730a008g003940, Wa8730a008g004200, Wa8730a009g000590, Wa8730a009g003340, Wa8730a013g002080, Wa8730a015g003690, Wa8730a017g002740, Wa8730a018g003530, Wa8730a019g003490, Wa8730a019g003750
GO:0034641	cellular nitrogen compound metabolic process	6/218	1681/13944	1.50811e-06	3	6	0.000548873	Wa8730a001g000970, Wa8730a001g010050, Wa8730a001g010900, Wa8730a009g003340, Wa8730a013g002080, Wa8730a018g003530
GO:0046483	heterocycle metabolic process	5/218	1543/13944	1.85595e-06	3	5	0.000641694	Wa8730a001g000970, Wa8730a001g010050, Wa8730a009g003340, Wa8730a013g002080, Wa8730a018g003530
GO:0010467	gene expression	0/218	720/13944	1.65064e-05	4	0	0.00456567
GO:0006139	nucleobase-containing compound metabolic process	5/218	1390/13944	1.76475e-05	4	5	0.00469355	Wa8730a001g000970, Wa8730a001g010050, Wa8730a009g003340, Wa8730a013g002080, Wa8730a018g003530
GO:0006996	organelle organization	2/218	954/13944	5.91629e-05	4	2	0.0131345	Wa8730a002g003100, Wa8730a017g002730
GO:0044260	cellular macromolecule metabolic process	9/218	1707/13944	6.07815e-05	4	9	0.0131345	Wa8730a001g004860, Wa8730a001g010900, Wa8730a007g007400, Wa8730a008g003940, Wa8730a008g004200, Wa8730a009g003340, Wa8730a015g003690, Wa8730a017g002740, Wa8730a019g003750
GO:0006725	cellular aromatic compound metabolic process	9/218	1595/13944	0.000225291	3	9	0.0389473	Wa8730a001g000970, Wa8730a001g010050, Wa8730a003g005060, Wa8730a003g005260, Wa8730a007g008930, Wa8730a009g003340, Wa8730a013g002080, Wa8730a015g004980, Wa8730a018g003530
GO:1901360	organic cyclic compound metabolic process	10/218	1662/13944	0.000295755	3	10	0.0484827	Wa8730a001g000970, Wa8730a001g010050, Wa8730a003g005060, Wa8730a003g005260, Wa8730a007g008930, Wa8730a009g003340, Wa8730a010g004870, Wa8730a013g002080, Wa8730a015g004980, Wa8730a018g003530
GO:0005783	endoplasmic reticulum	30/218	549/13944	2.14582e-09	5	30	2.30461e-06	Wa8730a001g011890, Wa8730a002g009930, Wa8730a002g009950, Wa8730a003g006990, Wa8730a006g004490, Wa8730a007g006900, Wa8730a008g002540, Wa8730a009g000590, Wa8730a009g001620, Wa8730a009g001730, Wa8730a011g001270, Wa8730a011g004580, Wa8730a011g004700, Wa8730a011g004730, Wa8730a011g004850, Wa8730a011g005590, Wa8730a012g001960, Wa8730a013g005120, Wa8730a013g005140, Wa8730a014g005820, Wa8730a015g005080, …
GO:0012505	endomembrane system	35/218	1104/13944	6.23207e-05	2	35	0.0111554	Wa8730a001g003580, Wa8730a001g010050, Wa8730a001g011890, Wa8730a002g009930, Wa8730a002g009950, Wa8730a003g006990, Wa8730a004g007740, Wa8730a005g003480, Wa8730a006g004490, Wa8730a007g002540, Wa8730a007g006900, Wa8730a008g002540, Wa8730a009g000590, Wa8730a009g001620, Wa8730a009g001730, Wa8730a011g001270, Wa8730a011g004580, Wa8730a011g004700, Wa8730a011g004730, Wa8730a011g004850, Wa8730a011g005590, …
GO:0009346	citrate lyase complex	2/218	2/13944	0.000243317	2	2	0.0290358	Wa8730a001g000970, Wa8730a018g003530
GO:0005886	plasma membrane	35/218	1185/13944	0.000308697	3	35	0.0331541	Wa8730a001g000970, Wa8730a001g003580, Wa8730a001g010050, Wa8730a001g010900, Wa8730a001g011890, Wa8730a002g001260, Wa8730a003g005030, Wa8730a004g007740, Wa8730a005g003150, Wa8730a005g005290, Wa8730a008g000260, Wa8730a008g003780, Wa8730a008g003940, Wa8730a008g004080, Wa8730a009g000590, Wa8730a009g001630, Wa8730a010g002100, Wa8730a010g004460, Wa8730a010g004870, Wa8730a011g001670, Wa8730a011g004580, …
GO:0031974	membrane-enclosed lumen	0/218	874/13944	1.39102e-06	2	0	0.00037349
GO:0043233	organelle lumen	0/218	874/13944	1.39102e-06	3	0	0.00037349
GO:0070013	intracellular organelle lumen	0/218	874/13944	1.39102e-06	3	0	0.00037349
GO:0031981	nuclear lumen	0/218	763/13944	7.11922e-06	4	0	0.00152921
GO:0043228	non-membrane-bounded organelle	2/218	895/13944	0.000122498	3	2	0.0164454	Wa8730a014g005820, Wa8730a017g002730
GO:0043232	intracellular non-membrane-bounded organelle	2/218	895/13944	0.000122498	4	2	0.0164454	Wa8730a014g005820, Wa8730a017g002730
GO:0032991	protein-containing complex	7/218	1331/13944	0.000440851	1	7	0.0430431	Wa8730a001g000970, Wa8730a009g000590, Wa8730a009g003340, Wa8730a014g005820, Wa8730a017g002730, Wa8730a018g003530, Wa8730a019g000710
GO:0009922	fatty acid elongase activity	5/218	9/13944	1.06835e-07	6	5	0.000252665	Wa8730a003g005060, Wa8730a003g005260, Wa8730a009g000590, Wa8730a014g005820, Wa8730a016g003000
GO:0016746	transferase activity, transferring acyl groups	12/218	129/13944	8.26552e-07	3	12	0.000977398	Wa8730a001g000970, Wa8730a003g005060, Wa8730a003g005260, Wa8730a009g000590, Wa8730a010g004870, Wa8730a011g004850, Wa8730a013g002080, Wa8730a014g005820, Wa8730a015g005080, Wa8730a015g005520, Wa8730a016g003000, Wa8730a018g003530
GO:0004312	fatty acid synthase activity	5/218	15/13944	2.35815e-06	5	5	0.00185901	Wa8730a003g005060, Wa8730a003g005260, Wa8730a009g000590, Wa8730a014g005820, Wa8730a016g003000
GO:0045703	ketoreductase activity	4/218	8/13944	3.8734e-06	4	4	0.00229015	Wa8730a006g004490, Wa8730a020g002750, Wa8730a020g002780, Wa8730a020g002800
GO:0016491	oxidoreductase activity	20/218	465/13944	4.23709e-05	2	20	0.0167012	Wa8730a001g010900, Wa8730a001g011890, Wa8730a006g004320, Wa8730a006g004490, Wa8730a006g004800, Wa8730a007g006900, Wa8730a009g000590, Wa8730a011g001270, Wa8730a011g004580, Wa8730a011g004700, Wa8730a011g004730, Wa8730a011g005590, Wa8730a013g005120, Wa8730a013g005140, Wa8730a017g002740, Wa8730a018g002300, Wa8730a019g001620, Wa8730a020g002750, Wa8730a020g002780, Wa8730a020g002800
GO:0016747	transferase activity, transferring acyl groups other than amino-acyl groups	9/218	118/13944	9.68498e-05	4	9	0.0327214	Wa8730a003g005060, Wa8730a003g005260, Wa8730a009g000590, Wa8730a010g004870, Wa8730a011g004850, Wa8730a014g005820, Wa8730a015g005080, Wa8730a015g005520, Wa8730a016g003000
GO:0018454	acetoacetyl-CoA reductase activity	3/218	7/13944	0.000125945	5	3	0.0330956	Wa8730a006g004490, Wa8730a020g002750, Wa8730a020g002800
GO:0046912	transferase activity, transferring acyl groups, acyl groups converted into alkyl on transfer	3/218	7/13944	0.000125945	4	3	0.0330956	Wa8730a001g000970, Wa8730a013g002080, Wa8730a018g003530
GO:0003723	RNA binding	0/218	724/13944	1.6794e-05	4	0	0.00794354

## Sheet: SC B GO
Dataset S7. Enriched GO terms for Differentially Expressed Genes for Dusk Supercluster B
GO	Name	Ratio in Study	Ratio in Pop.	p Value	Depth	Study Count	p Value (BH-FDR)	Study Items
GO:0009768	photosynthesis, light harvesting in photosystem I	4/58	14/13944	2.61e-07	5	4	0.001808	Wa8730a006g005790, Wa8730a007g002830, Wa8730a012g000440, Wa8730a012g005370
GO:0009765	photosynthesis, light harvesting	4/58	31/13944	7.8e-06	4	4	0.02696	Wa8730a006g005790, Wa8730a007g002830, Wa8730a012g000440, Wa8730a012g005370
GO:0009507	chloroplast	27/58	1296/13944	1.64e-13	6	27	1.76e-10	Wa8730a001g001580, Wa8730a002g000800, Wa8730a002g004220, Wa8730a002g007150, Wa8730a002g007210, Wa8730a005g003170, Wa8730a005g007230, Wa8730a005g007240, Wa8730a005g008430, Wa8730a006g000470, Wa8730a006g005790, Wa8730a007g001290, Wa8730a007g002830, Wa8730a008g004450, Wa8730a009g002620, Wa8730a009g004480, Wa8730a010g002220, Wa8730a010g003380, Wa8730a010g003390, Wa8730a010g003550, Wa8730a012g000440, …
GO:0009536	plastid	27/58	1339/13944	3.62e-13	5	27	1.94e-10	Wa8730a001g001580, Wa8730a002g000800, Wa8730a002g004220, Wa8730a002g007150, Wa8730a002g007210, Wa8730a005g003170, Wa8730a005g007230, Wa8730a005g007240, Wa8730a005g008430, Wa8730a006g000470, Wa8730a006g005790, Wa8730a007g001290, Wa8730a007g002830, Wa8730a008g004450, Wa8730a009g002620, Wa8730a009g004480, Wa8730a010g002220, Wa8730a010g003380, Wa8730a010g003390, Wa8730a010g003550, Wa8730a012g000440, …
GO:0009579	thylakoid	12/58	306/13944	3.64e-09	3	12	1.3e-06	Wa8730a001g001580, Wa8730a002g000800, Wa8730a006g000470, Wa8730a006g005790, Wa8730a007g002830, Wa8730a008g004450, Wa8730a009g002620, Wa8730a009g004480, Wa8730a012g000440, Wa8730a012g002080, Wa8730a012g005370, Wa8730a017g000530
GO:0034357	photosynthetic membrane	10/58	216/13944	1.76e-08	3	10	3.87e-06	Wa8730a001g001580, Wa8730a002g000800, Wa8730a006g005790, Wa8730a007g002830, Wa8730a008g004450, Wa8730a009g002620, Wa8730a009g004480, Wa8730a012g000440, Wa8730a012g002080, Wa8730a012g005370
GO:0009941	chloroplast envelope	12/58	353/13944	1.8e-08	5	12	3.87e-06	Wa8730a001g001580, Wa8730a002g004220, Wa8730a005g003170, Wa8730a006g000470, Wa8730a006g005790, Wa8730a007g002830, Wa8730a009g002620, Wa8730a012g002080, Wa8730a012g005370, Wa8730a018g003740, Wa8730a019g003840, Wa8730a020g002810
GO:0009570	chloroplast stroma	13/58	450/13944	2.91e-08	3	13	4.51e-06	Wa8730a001g001580, Wa8730a002g000800, Wa8730a002g004220, Wa8730a006g000470, Wa8730a006g005790, Wa8730a007g001290, Wa8730a007g002830, Wa8730a009g002620, Wa8730a012g002080, Wa8730a012g005370, Wa8730a018g003740, Wa8730a019g003840, Wa8730a020g002810
GO:0009526	plastid envelope	12/58	369/13944	2.94e-08	4	12	4.51e-06	Wa8730a001g001580, Wa8730a002g004220, Wa8730a005g003170, Wa8730a006g000470, Wa8730a006g005790, Wa8730a007g002830, Wa8730a009g002620, Wa8730a012g002080, Wa8730a012g005370, Wa8730a018g003740, Wa8730a019g003840, Wa8730a020g002810
GO:0009532	plastid stroma	13/58	459/13944	3.67e-08	2	13	4.93e-06	Wa8730a001g001580, Wa8730a002g000800, Wa8730a002g004220, Wa8730a006g000470, Wa8730a006g005790, Wa8730a007g001290, Wa8730a007g002830, Wa8730a009g002620, Wa8730a012g002080, Wa8730a012g005370, Wa8730a018g003740, Wa8730a019g003840, Wa8730a020g002810
GO:0009534	chloroplast thylakoid	10/58	247/13944	6.27e-08	5	10	7.27e-06	Wa8730a001g001580, Wa8730a002g000800, Wa8730a006g000470, Wa8730a006g005790, Wa8730a007g002830, Wa8730a008g004450, Wa8730a009g002620, Wa8730a009g004480, Wa8730a012g002080, Wa8730a012g005370
GO:0031976	plastid thylakoid	10/58	249/13944	6.77e-08	4	10	7.27e-06	Wa8730a001g001580, Wa8730a002g000800, Wa8730a006g000470, Wa8730a006g005790, Wa8730a007g002830, Wa8730a008g004450, Wa8730a009g002620, Wa8730a009g004480, Wa8730a012g002080, Wa8730a012g005370
GO:0009535	chloroplast thylakoid membrane	9/58	197/13944	1.09e-07	6	9	1.07e-05	Wa8730a001g001580, Wa8730a002g000800, Wa8730a006g005790, Wa8730a007g002830, Wa8730a008g004450, Wa8730a009g002620, Wa8730a009g004480, Wa8730a012g002080, Wa8730a012g005370
GO:0055035	plastid thylakoid membrane	9/58	202/13944	1.36e-07	5	9	1.21e-05	Wa8730a001g001580, Wa8730a002g000800, Wa8730a006g005790, Wa8730a007g002830, Wa8730a008g004450, Wa8730a009g002620, Wa8730a009g004480, Wa8730a012g002080, Wa8730a012g005370
GO:0042651	thylakoid membrane	9/58	215/13944	2.31e-07	4	9	1.9e-05	Wa8730a001g001580, Wa8730a002g000800, Wa8730a006g005790, Wa8730a007g002830, Wa8730a008g004450, Wa8730a009g002620, Wa8730a009g004480, Wa8730a012g002080, Wa8730a012g005370
GO:0010287	plastoglobule	5/58	53/13944	2.57e-06	2	5	0.000197	Wa8730a006g005790, Wa8730a007g002830, Wa8730a009g002620, Wa8730a012g005370, Wa8730a018g003740
GO:0031967	organelle envelope	12/58	584/13944	3.97e-06	3	12	0.000266	Wa8730a001g001580, Wa8730a002g004220, Wa8730a005g003170, Wa8730a006g000470, Wa8730a006g005790, Wa8730a007g002830, Wa8730a009g002620, Wa8730a012g002080, Wa8730a012g005370, Wa8730a018g003740, Wa8730a019g003840, Wa8730a020g002810
GO:0031975	envelope	12/58	584/13944	3.97e-06	2	12	0.000266	Wa8730a001g001580, Wa8730a002g004220, Wa8730a005g003170, Wa8730a006g000470, Wa8730a006g005790, Wa8730a007g002830, Wa8730a009g002620, Wa8730a012g002080, Wa8730a012g005370, Wa8730a018g003740, Wa8730a019g003840, Wa8730a020g002810
GO:0042807	central vacuole	2/58	4/13944	0.000101	7	2	0.006411	Wa8730a005g003170, Wa8730a005g003250
GO:0005737	cytoplasm	32/58	4342/13944	0.000164	2	32	0.009535	Wa8730a001g001580, Wa8730a002g000800, Wa8730a002g004220, Wa8730a002g007150, Wa8730a002g007210, Wa8730a005g003170, Wa8730a005g003250, Wa8730a005g004460, Wa8730a005g007230, Wa8730a005g007240, Wa8730a005g008430, Wa8730a006g000440, Wa8730a006g000470, Wa8730a006g005790, Wa8730a007g001290, Wa8730a007g002830, Wa8730a008g004450, Wa8730a009g002620, Wa8730a009g004480, Wa8730a010g002220, Wa8730a010g003380, …
GO:0000314	organellar small ribosomal subunit	2/58	5/13944	0.000169	5	2	0.009535	Wa8730a002g000800, Wa8730a009g002620
GO:0005840	ribosome	5/58	145/13944	0.000334	5	5	0.017926	Wa8730a001g001580, Wa8730a002g000800, Wa8730a006g000470, Wa8730a009g002620, Wa8730a018g003740
GO:0031984	organelle subcompartment	10/58	679/13944	0.000439	2	10	0.022451	Wa8730a001g001580, Wa8730a002g000800, Wa8730a006g000470, Wa8730a006g005790, Wa8730a007g002830, Wa8730a008g004450, Wa8730a009g002620, Wa8730a009g004480, Wa8730a012g002080, Wa8730a012g005370
GO:0031409	pigment binding	3/58	13/13944	1.9e-05	2	3	0.043521	Wa8730a006g005790, Wa8730a007g002830, Wa8730a012g005370
GO:0016168	chlorophyll binding	3/58	16/13944	3.68e-05	4	3	0.043521	Wa8730a006g005790, Wa8730a007g002830, Wa8730a012g005370

## Sheet: SC C GO
Dataset S7. Enriched GO terms for Differentially Expressed Genes for Dusk Supercluster C
GO	Name	Ratio in Study	Ratio in Pop.	p Value	Depth	Study Count	p Value (BH-FDR)	Study Items
GO:0046519	sphingoid metabolic process	11/96	27/13944	1.08706e-17	7	11	7.51699e-14	Wa8730a006g003620, Wa8730a009g003140, Wa8730a009g003160, Wa8730a009g003220, Wa8730a012g005020, Wa8730a014g001120, Wa8730a014g001670, Wa8730a014g002160, Wa8730a014g002170, Wa8730a014g002180, Wa8730a016g000390
GO:0046520	sphingoid biosynthetic process	9/96	15/13944	1.14526e-16	8	9	3.95975e-13	Wa8730a006g003620, Wa8730a009g003140, Wa8730a009g003160, Wa8730a009g003220, Wa8730a012g005020, Wa8730a014g001670, Wa8730a014g002160, Wa8730a014g002170, Wa8730a014g002180
GO:0030148	sphingolipid biosynthetic process	11/96	36/13944	4.76263e-16	7	11	1.09779e-12	Wa8730a006g003620, Wa8730a009g003140, Wa8730a009g003160, Wa8730a009g003220, Wa8730a012g005020, Wa8730a014g001120, Wa8730a014g001670, Wa8730a014g002160, Wa8730a014g002170, Wa8730a014g002180, Wa8730a016g000390
GO:0097164	ammonium ion metabolic process	11/96	42/13944	3.28088e-15	3	11	5.67182e-12	Wa8730a006g003620, Wa8730a009g003140, Wa8730a009g003160, Wa8730a009g003220, Wa8730a012g005020, Wa8730a014g001120, Wa8730a014g001670, Wa8730a014g002160, Wa8730a014g002170, Wa8730a014g002180, Wa8730a016g000390
GO:0006665	sphingolipid metabolic process	11/96	44/13944	5.81263e-15	6	11	8.03886e-12	Wa8730a006g003620, Wa8730a009g003140, Wa8730a009g003160, Wa8730a009g003220, Wa8730a012g005020, Wa8730a014g001120, Wa8730a014g001670, Wa8730a014g002160, Wa8730a014g002170, Wa8730a014g002180, Wa8730a016g000390
GO:0009640	photomorphogenesis	10/96	47/13944	6.21328e-13	6	10	7.1073e-10	Wa8730a006g003620, Wa8730a009g003140, Wa8730a009g003160, Wa8730a009g003220, Wa8730a012g005020, Wa8730a014g001670, Wa8730a014g002160, Wa8730a014g002170, Wa8730a014g002180, Wa8730a020g000340
GO:0046467	membrane lipid biosynthetic process	11/96	66/13944	7.19466e-13	6	11	7.1073e-10	Wa8730a006g003620, Wa8730a009g003140, Wa8730a009g003160, Wa8730a009g003220, Wa8730a012g005020, Wa8730a014g001120, Wa8730a014g001670, Wa8730a014g002160, Wa8730a014g002170, Wa8730a014g002180, Wa8730a016g000390
GO:0006643	membrane lipid metabolic process	11/96	73/13944	2.29174e-12	5	11	1.98092e-09	Wa8730a006g003620, Wa8730a009g003140, Wa8730a009g003160, Wa8730a009g003220, Wa8730a012g005020, Wa8730a014g001120, Wa8730a014g001670, Wa8730a014g002160, Wa8730a014g002170, Wa8730a014g002180, Wa8730a016g000390
GO:0009639	response to red or far red light	10/96	97/13944	1.13868e-09	5	10	8.74884e-07	Wa8730a006g003620, Wa8730a009g003140, Wa8730a009g003160, Wa8730a009g003220, Wa8730a012g005020, Wa8730a014g001670, Wa8730a014g002160, Wa8730a014g002170, Wa8730a014g002180, Wa8730a020g000340
GO:0008610	lipid biosynthetic process	13/96	259/13944	2.37663e-08	4	13	1.64344e-05	Wa8730a005g001430, Wa8730a006g003620, Wa8730a009g003140, Wa8730a009g003160, Wa8730a009g003220, Wa8730a009g005210, Wa8730a012g005020, Wa8730a014g001120, Wa8730a014g001670, Wa8730a014g002160, Wa8730a014g002170, Wa8730a014g002180, Wa8730a016g000390
GO:0044255	cellular lipid metabolic process	13/96	378/13944	1.83239e-06	4	13	0.00115191	Wa8730a005g001430, Wa8730a006g003620, Wa8730a009g003140, Wa8730a009g003160, Wa8730a009g003220, Wa8730a009g005210, Wa8730a012g005020, Wa8730a014g001120, Wa8730a014g001670, Wa8730a014g002160, Wa8730a014g002170, Wa8730a014g002180, Wa8730a016g000390
GO:0006629	lipid metabolic process	13/96	428/13944	7.12909e-06	3	13	0.00410814	Wa8730a005g001430, Wa8730a006g003620, Wa8730a009g003140, Wa8730a009g003160, Wa8730a009g003220, Wa8730a009g005210, Wa8730a012g005020, Wa8730a014g001120, Wa8730a014g001670, Wa8730a014g002160, Wa8730a014g002170, Wa8730a014g002180, Wa8730a016g000390
GO:1901566	organonitrogen compound biosynthetic process	14/96	548/13944	2.1851e-05	4	14	0.0107929	Wa8730a001g006770, Wa8730a006g003620, Wa8730a009g000440, Wa8730a009g003140, Wa8730a009g003160, Wa8730a009g003220, Wa8730a012g005020, Wa8730a013g005820, Wa8730a014g001120, Wa8730a014g001670, Wa8730a014g002160, Wa8730a014g002170, Wa8730a014g002180, Wa8730a016g000390
GO:0009416	response to light stimulus	12/96	418/13944	2.88444e-05	4	12	0.0132973	Wa8730a001g006770, Wa8730a006g003620, Wa8730a009g003140, Wa8730a009g003160, Wa8730a009g003220, Wa8730a012g005020, Wa8730a014g001670, Wa8730a014g002160, Wa8730a014g002170, Wa8730a014g002180, Wa8730a015g004370, Wa8730a020g000340
GO:0009314	response to radiation	12/96	460/13944	7.28558e-05	3	12	0.0314874	Wa8730a001g006770, Wa8730a006g003620, Wa8730a009g003140, Wa8730a009g003160, Wa8730a009g003220, Wa8730a012g005020, Wa8730a014g001670, Wa8730a014g002160, Wa8730a014g002170, Wa8730a014g002180, Wa8730a015g004370, Wa8730a020g000340
GO:0009791	post-embryonic development	16/96	788/13944	8.76556e-05	2	16	0.0356552	Wa8730a003g008800, Wa8730a004g007210, Wa8730a006g003620, Wa8730a009g003140, Wa8730a009g003160, Wa8730a009g003220, Wa8730a009g003530, Wa8730a012g005020, Wa8730a013g001900, Wa8730a013g005520, Wa8730a014g001670, Wa8730a014g002160, Wa8730a014g002170, Wa8730a014g002180, Wa8730a014g002860, Wa8730a020g000340
GO:0043170	macromolecule metabolic process	3/96	2515/13944	1.35141e-05	3	3	0.00718844	Wa8730a004g007210, Wa8730a009g005900, Wa8730a020g000340
GO:0031090	organelle membrane	23/96	847/13944	9.61449e-09	3	23	1.0326e-05	Wa8730a001g007510, Wa8730a004g000480, Wa8730a004g001070, Wa8730a006g003620, Wa8730a007g000220, Wa8730a009g000440, Wa8730a009g003140, Wa8730a009g003160, Wa8730a009g003220, Wa8730a010g000090, Wa8730a012g005020, Wa8730a013g001590, Wa8730a013g005830, Wa8730a014g001120, Wa8730a014g001670, Wa8730a014g002160, Wa8730a014g002170, Wa8730a014g002180, Wa8730a014g004370, Wa8730a015g002300, Wa8730a016g000390, …
GO:0005753	mitochondrial proton-transporting ATP synthase complex	4/96	8/13944	1.44593e-07	5	4	5.17643e-05	Wa8730a001g007510, Wa8730a004g000480, Wa8730a007g000220, Wa8730a018g003750
GO:0045259	proton-transporting ATP synthase complex	4/96	8/13944	1.44593e-07	4	4	5.17643e-05	Wa8730a001g007510, Wa8730a004g000480, Wa8730a007g000220, Wa8730a018g003750
GO:0098800	inner mitochondrial membrane protein complex	7/96	62/13944	2.1216e-07	3	7	5.69648e-05	Wa8730a001g007510, Wa8730a004g000480, Wa8730a007g000220, Wa8730a013g001590, Wa8730a014g004370, Wa8730a018g003750, Wa8730a019g001950
GO:0005789	endoplasmic reticulum membrane	11/96	232/13944	5.43257e-07	4	11	9.46896e-05	Wa8730a006g003620, Wa8730a009g003140, Wa8730a009g003160, Wa8730a009g003220, Wa8730a012g005020, Wa8730a014g001120, Wa8730a014g001670, Wa8730a014g002160, Wa8730a014g002170, Wa8730a014g002180, Wa8730a016g000390
GO:0042175	nuclear outer membrane-endoplasmic reticulum membrane network	11/96	233/13944	5.66971e-07	3	11	9.46896e-05	Wa8730a006g003620, Wa8730a009g003140, Wa8730a009g003160, Wa8730a009g003220, Wa8730a012g005020, Wa8730a014g001120, Wa8730a014g001670, Wa8730a014g002160, Wa8730a014g002170, Wa8730a014g002180, Wa8730a016g000390
GO:0098827	endoplasmic reticulum subcompartment	11/96	235/13944	6.17157e-07	3	11	9.46896e-05	Wa8730a006g003620, Wa8730a009g003140, Wa8730a009g003160, Wa8730a009g003220, Wa8730a012g005020, Wa8730a014g001120, Wa8730a014g001670, Wa8730a014g002160, Wa8730a014g002170, Wa8730a014g002180, Wa8730a016g000390
GO:0098798	mitochondrial protein-containing complex	7/96	82/13944	1.4665e-06	2	7	0.000196878	Wa8730a001g007510, Wa8730a004g000480, Wa8730a007g000220, Wa8730a013g001590, Wa8730a014g004370, Wa8730a018g003750, Wa8730a019g001950
GO:0016020	membrane	35/96	2296/13944	2.26003e-06	2	35	0.000269697	Wa8730a001g007510, Wa8730a001g007820, Wa8730a003g004980, Wa8730a004g000480, Wa8730a004g001070, Wa8730a004g006820, Wa8730a005g004270, Wa8730a006g002120, Wa8730a006g003620, Wa8730a007g000220, Wa8730a008g003840, Wa8730a008g005660, Wa8730a009g000440, Wa8730a009g003140, Wa8730a009g003160, Wa8730a009g003220, Wa8730a009g003530, Wa8730a010g000090, Wa8730a012g004900, Wa8730a012g005020, Wa8730a013g001590, …
GO:0016469	proton-transporting two-sector ATPase complex	4/96	21/13944	1.15418e-05	3	4	0.00123959	Wa8730a001g007510, Wa8730a004g000480, Wa8730a007g000220, Wa8730a018g003750
GO:0005743	mitochondrial inner membrane	7/96	123/13944	2.17889e-05	5	7	0.00212739	Wa8730a001g007510, Wa8730a004g000480, Wa8730a007g000220, Wa8730a013g001590, Wa8730a014g004370, Wa8730a018g003750, Wa8730a019g001950
GO:0045271	respiratory chain complex I	4/96	26/13944	2.80797e-05	5	4	0.00215411	Wa8730a004g000480, Wa8730a013g001590, Wa8730a014g004370, Wa8730a019g001950
GO:0005747	mitochondrial respiratory chain complex I	4/96	26/13944	2.80797e-05	6	4	0.00215411	Wa8730a004g000480, Wa8730a013g001590, Wa8730a014g004370, Wa8730a019g001950
GO:0030964	NADH dehydrogenase complex	4/96	26/13944	2.80797e-05	4	4	0.00215411	Wa8730a004g000480, Wa8730a013g001590, Wa8730a014g004370, Wa8730a019g001950
GO:0031966	mitochondrial membrane	7/96	140/13944	5.0108e-05	4	7	0.00358773	Wa8730a001g007510, Wa8730a004g000480, Wa8730a007g000220, Wa8730a013g001590, Wa8730a014g004370, Wa8730a018g003750, Wa8730a019g001950
GO:0005740	mitochondrial envelope	7/96	145/13944	6.26312e-05	4	7	0.00420412	Wa8730a001g007510, Wa8730a004g000480, Wa8730a007g000220, Wa8730a013g001590, Wa8730a014g004370, Wa8730a018g003750, Wa8730a019g001950
GO:0019866	organelle inner membrane	7/96	167/13944	0.000151876	4	7	0.00948615	Wa8730a001g007510, Wa8730a004g000480, Wa8730a007g000220, Wa8730a013g001590, Wa8730a014g004370, Wa8730a018g003750, Wa8730a019g001950
GO:0098796	membrane protein complex	8/96	225/13944	0.000158986	2	8	0.00948615	Wa8730a001g007510, Wa8730a004g000480, Wa8730a006g003620, Wa8730a007g000220, Wa8730a013g001590, Wa8730a014g004370, Wa8730a018g003750, Wa8730a019g001950
GO:0005618	cell wall	9/96	293/13944	0.000184997	3	9	0.0101905	Wa8730a001g007090, Wa8730a004g006820, Wa8730a005g004270, Wa8730a006g004140, Wa8730a006g004370, Wa8730a009g000440, Wa8730a009g003530, Wa8730a009g004310, Wa8730a018g003750
GO:0030312	external encapsulating structure	9/96	294/13944	0.000189767	2	9	0.0101905	Wa8730a001g007090, Wa8730a004g006820, Wa8730a005g004270, Wa8730a006g004140, Wa8730a006g004370, Wa8730a009g000440, Wa8730a009g003530, Wa8730a009g004310, Wa8730a018g003750
GO:0005746	mitochondrial respirasome	4/96	44/13944	0.000231911	3	4	0.0118234	Wa8730a004g000480, Wa8730a013g001590, Wa8730a014g004370, Wa8730a019g001950
GO:0070469	respirasome	4/96	45/13944	0.000253202	2	4	0.0118234	Wa8730a004g000480, Wa8730a013g001590, Wa8730a014g004370, Wa8730a019g001950
GO:0098803	respiratory chain complex	4/96	45/13944	0.000253202	3	4	0.0118234	Wa8730a004g000480, Wa8730a013g001590, Wa8730a014g004370, Wa8730a019g001950
GO:0005783	endoplasmic reticulum	12/96	549/13944	0.000376805	5	12	0.016862	Wa8730a005g001430, Wa8730a006g003620, Wa8730a009g003140, Wa8730a009g003160, Wa8730a009g003220, Wa8730a012g005020, Wa8730a014g001120, Wa8730a014g001670, Wa8730a014g002160, Wa8730a014g002170, Wa8730a014g002180, Wa8730a016g000390
GO:0005794	Golgi apparatus	11/96	475/13944	0.000413388	5	11	0.0177591	Wa8730a004g006820, Wa8730a009g003140, Wa8730a009g003160, Wa8730a009g003220, Wa8730a009g003530, Wa8730a012g005020, Wa8730a014g001670, Wa8730a014g002160, Wa8730a014g002170, Wa8730a014g002180, Wa8730a015g002300
GO:1990204	oxidoreductase complex	4/96	53/13944	0.000477143	3	4	0.0197097	Wa8730a004g000480, Wa8730a013g001590, Wa8730a014g004370, Wa8730a019g001950
GO:0031984	organelle subcompartment	13/96	679/13944	0.000747102	2	13	0.0297181	Wa8730a006g003620, Wa8730a009g003140, Wa8730a009g003160, Wa8730a009g003220, Wa8730a009g003530, Wa8730a012g005020, Wa8730a014g001120, Wa8730a014g001670, Wa8730a014g002160, Wa8730a014g002170, Wa8730a014g002180, Wa8730a015g002300, Wa8730a016g000390
GO:0005576	extracellular region	7/96	230/13944	0.00104146	2	7	0.0399475	Wa8730a003g005480, Wa8730a005g004270, Wa8730a009g000440, Wa8730a009g003530, Wa8730a013g005830, Wa8730a014g001120, Wa8730a016g000390
GO:0042284	sphingolipid delta-4 desaturase activity	8/96	11/13944	6.08122e-16	4	8	1.43821e-12	Wa8730a009g003140, Wa8730a009g003160, Wa8730a009g003220, Wa8730a012g005020, Wa8730a014g001670, Wa8730a014g002160, Wa8730a014g002170, Wa8730a014g002180
GO:0016705	oxidoreductase activity, acting on paired donors, with incorporation or reduction of molecular oxygen	12/96	91/13944	1.12894e-12	3	12	1.33497e-09	Wa8730a005g001430, Wa8730a008g005660, Wa8730a009g003140, Wa8730a009g003160, Wa8730a009g003220, Wa8730a012g005020, Wa8730a013g001900, Wa8730a014g001670, Wa8730a014g002160, Wa8730a014g002170, Wa8730a014g002180, Wa8730a015g000910
GO:0016491	oxidoreductase activity	21/96	465/13944	4.76862e-12	2	21	3.75926e-09	Wa8730a001g007090, Wa8730a005g001430, Wa8730a005g004270, Wa8730a006g004140, Wa8730a006g004370, Wa8730a008g005660, Wa8730a009g003140, Wa8730a009g003160, Wa8730a009g003220, Wa8730a009g005210, Wa8730a012g005020, Wa8730a013g001900, Wa8730a013g005820, Wa8730a013g005830, Wa8730a014g001120, Wa8730a014g001670, Wa8730a014g002160, Wa8730a014g002170, Wa8730a014g002180, Wa8730a015g000910, Wa8730a016g000390

## Sheet: SC D GO
Dataset S7. Enriched GO terms for Differentially Expressed Genes for Dusk Supercluster D
GO	Name	Ratio in Study	Ratio in Pop.	p Value	Depth	Study Count	p Value (BH-FDR)	Study Items
GO:1901700	response to oxygen-containing compound	34/220	795/13944	9.93e-08	3	34	0.000352	Wa8730a001g003830, Wa8730a001g007370, Wa8730a001g011840, Wa8730a003g004240, Wa8730a004g000410, Wa8730a004g006020, Wa8730a004g008480, Wa8730a005g003750, Wa8730a006g000510, Wa8730a007g000980, Wa8730a007g002940, Wa8730a009g003680, Wa8730a010g000800, Wa8730a010g001140, Wa8730a010g001420, Wa8730a010g003440, Wa8730a011g000090, Wa8730a011g002350, Wa8730a011g003230, Wa8730a011g003790, Wa8730a012g004840, …
GO:0010200	response to chitin	10/220	68/13944	1.02e-07	5	10	0.000352	Wa8730a001g003830, Wa8730a001g007370, Wa8730a006g000510, Wa8730a011g003790, Wa8730a012g004840, Wa8730a015g000740, Wa8730a015g002550, Wa8730a019g000660, Wa8730a019g000680, Wa8730a019g001080
GO:0042493	response to drug	18/220	288/13944	7.22e-07	3	18	0.001248	Wa8730a001g003830, Wa8730a001g007370, Wa8730a004g008620, Wa8730a005g003750, Wa8730a006g000510, Wa8730a010g001420, Wa8730a011g003230, Wa8730a011g003790, Wa8730a012g004840, Wa8730a014g004410, Wa8730a015g000740, Wa8730a015g002550, Wa8730a017g002000, Wa8730a018g001290, Wa8730a019g000660, Wa8730a019g000680, Wa8730a019g001080, Wa8730a020g000110
GO:0009414	response to water deprivation	13/220	177/13944	4.62e-06	5	13	0.003281	Wa8730a004g006020, Wa8730a004g008480, Wa8730a007g002940, Wa8730a009g003680, Wa8730a010g000800, Wa8730a011g000090, Wa8730a011g002350, Wa8730a011g003790, Wa8730a013g001140, Wa8730a013g005360, Wa8730a018g000270, Wa8730a018g001290, Wa8730a019g001080
GO:0001101	response to acid chemical	25/220	578/13944	4.74e-06	3	25	0.003281	Wa8730a001g011840, Wa8730a003g004240, Wa8730a004g000410, Wa8730a004g006020, Wa8730a004g008480, Wa8730a005g003750, Wa8730a006g000510, Wa8730a007g000980, Wa8730a007g002940, Wa8730a009g003680, Wa8730a010g000800, Wa8730a010g001140, Wa8730a010g003440, Wa8730a011g000090, Wa8730a011g002350, Wa8730a011g003230, Wa8730a011g003790, Wa8730a013g001140, Wa8730a013g005360, Wa8730a017g002000, Wa8730a017g002670, …
GO:0009415	response to water	13/220	180/13944	5.56e-06	4	13	0.003494	Wa8730a004g006020, Wa8730a004g008480, Wa8730a007g002940, Wa8730a009g003680, Wa8730a010g000800, Wa8730a011g000090, Wa8730a011g002350, Wa8730a011g003790, Wa8730a013g001140, Wa8730a013g005360, Wa8730a018g000270, Wa8730a018g001290, Wa8730a019g001080
GO:0042221	response to chemical	44/220	1392/13944	6.61e-06	2	44	0.003808	Wa8730a001g003830, Wa8730a001g007370, Wa8730a001g011840, Wa8730a002g005830, Wa8730a003g004240, Wa8730a004g000410, Wa8730a004g002910, Wa8730a004g006020, Wa8730a004g008480, Wa8730a004g008620, Wa8730a005g003750, Wa8730a005g004060, Wa8730a005g004220, Wa8730a006g000510, Wa8730a007g000980, Wa8730a007g002940, Wa8730a007g007600, Wa8730a009g003680, Wa8730a010g000800, Wa8730a010g001140, Wa8730a010g001420, …
GO:0010243	response to organonitrogen compound	11/220	146/13944	1.99e-05	4	11	0.009839	Wa8730a001g003830, Wa8730a001g007370, Wa8730a005g003750, Wa8730a006g000510, Wa8730a011g003790, Wa8730a012g004840, Wa8730a015g000740, Wa8730a015g002550, Wa8730a019g000660, Wa8730a019g000680, Wa8730a019g001080
GO:0009737	response to abscisic acid	15/220	270/13944	2.54e-05	5	15	0.010967	Wa8730a001g011840, Wa8730a003g004240, Wa8730a004g006020, Wa8730a004g008480, Wa8730a005g003750, Wa8730a006g000510, Wa8730a007g000980, Wa8730a007g002940, Wa8730a010g000800, Wa8730a011g003230, Wa8730a011g003790, Wa8730a017g002670, Wa8730a018g000270, Wa8730a018g001130, Wa8730a018g001290
GO:0097305	response to alcohol	15/220	276/13944	3.27e-05	4	15	0.013321	Wa8730a001g011840, Wa8730a003g004240, Wa8730a004g006020, Wa8730a004g008480, Wa8730a005g003750, Wa8730a006g000510, Wa8730a007g000980, Wa8730a007g002940, Wa8730a010g000800, Wa8730a011g003230, Wa8730a011g003790, Wa8730a017g002670, Wa8730a018g000270, Wa8730a018g001130, Wa8730a018g001290
GO:0010035	response to inorganic substance	21/220	495/13944	3.79e-05	3	21	0.014559	Wa8730a004g006020, Wa8730a004g008480, Wa8730a005g003750, Wa8730a005g004060, Wa8730a007g002940, Wa8730a009g003680, Wa8730a010g000800, Wa8730a010g001420, Wa8730a011g000090, Wa8730a011g002350, Wa8730a011g003230, Wa8730a011g003790, Wa8730a013g001140, Wa8730a013g004490, Wa8730a013g005360, Wa8730a014g005560, Wa8730a018g000270, Wa8730a018g001290, Wa8730a019g000660, Wa8730a019g000680, Wa8730a019g001080
GO:0070887	cellular response to chemical stimulus	22/220	541/13944	4.65e-05	3	22	0.016932	Wa8730a001g003830, Wa8730a001g011840, Wa8730a003g004240, Wa8730a004g000410, Wa8730a004g002910, Wa8730a004g006020, Wa8730a004g008480, Wa8730a004g008620, Wa8730a005g003750, Wa8730a005g004220, Wa8730a006g000510, Wa8730a007g007600, Wa8730a010g000800, Wa8730a010g001140, Wa8730a011g003230, Wa8730a013g004490, Wa8730a015g002550, Wa8730a017g002670, Wa8730a018g000270, Wa8730a018g000340, Wa8730a019g000660, …
GO:0010033	response to organic substance	31/220	939/13944	0.000101	3	31	0.03314	Wa8730a001g003830, Wa8730a001g007370, Wa8730a001g011840, Wa8730a002g005830, Wa8730a003g004240, Wa8730a004g000410, Wa8730a004g006020, Wa8730a004g008480, Wa8730a005g003750, Wa8730a005g004060, Wa8730a006g000510, Wa8730a007g000980, Wa8730a007g002940, Wa8730a007g007600, Wa8730a010g000800, Wa8730a010g001140, Wa8730a010g003440, Wa8730a011g003230, Wa8730a011g003790, Wa8730a012g004840, Wa8730a015g000740, …
GO:0006139	nucleobase-containing compound metabolic process	3/220	1390/13944	3.47e-07	4	3	0.000799	Wa8730a003g006350, Wa8730a007g000380, Wa8730a017g003290
GO:0034641	cellular nitrogen compound metabolic process	6/220	1681/13944	1.02e-06	3	6	0.00127	Wa8730a003g006350, Wa8730a005g003350, Wa8730a007g000380, Wa8730a011g003700, Wa8730a017g003290, Wa8730a019g001080
GO:0090304	nucleic acid metabolic process	2/220	1196/13944	1.17e-06	5	2	0.00127	Wa8730a003g006350, Wa8730a007g000380
GO:0046483	heterocycle metabolic process	5/220	1543/13944	1.29e-06	3	5	0.00127	Wa8730a003g006350, Wa8730a007g000380, Wa8730a011g003700, Wa8730a017g003290, Wa8730a019g001080
GO:0006725	cellular aromatic compound metabolic process	6/220	1595/13944	3.15e-06	3	6	0.002722	Wa8730a003g006350, Wa8730a004g002910, Wa8730a005g004220, Wa8730a007g000380, Wa8730a017g003290, Wa8730a019g001080
GO:0006807	nitrogen compound metabolic process	21/220	2865/13944	1.5e-05	2	21	0.007996	Wa8730a001g003830, Wa8730a001g004200, Wa8730a003g006350, Wa8730a005g003350, Wa8730a005g004060, Wa8730a006g002900, Wa8730a007g000380, Wa8730a010g000800, Wa8730a011g003700, Wa8730a011g003790, Wa8730a011g005580, Wa8730a013g004060, Wa8730a014g001980, Wa8730a014g006110, Wa8730a015g004800, Wa8730a016g004300, Wa8730a017g002000, Wa8730a017g002670, Wa8730a017g003290, Wa8730a018g000270, Wa8730a019g001080
GO:1901360	organic cyclic compound metabolic process	8/220	1662/13944	2.17e-05	3	8	0.009984	Wa8730a003g006350, Wa8730a004g002910, Wa8730a005g004220, Wa8730a007g000380, Wa8730a011g000090, Wa8730a011g003700, Wa8730a017g003290, Wa8730a019g001080
GO:0016070	RNA metabolic process	2/220	923/13944	8.84e-05	6	2	0.030576	Wa8730a003g006350, Wa8730a007g000380
GO:0043170	macromolecule metabolic process	19/220	2515/13944	0.000126	3	19	0.039653	Wa8730a001g003830, Wa8730a001g004200, Wa8730a001g006070, Wa8730a002g003450, Wa8730a003g006350, Wa8730a005g005110, Wa8730a006g002900, Wa8730a007g000380, Wa8730a010g000800, Wa8730a011g005580, Wa8730a013g004060, Wa8730a013g005360, Wa8730a014g001980, Wa8730a014g006110, Wa8730a015g004680, Wa8730a015g004800, Wa8730a016g004300, Wa8730a017g002670, Wa8730a018g000270
