# Supplementary material for: Streamlined spatial and environmental expression signatures characterize the minimalist duckweedWolffia australiana
Source: HighWire-hosted journal article supplement (doi:10.1101/gr.279091.124), 2024-07-01
Supplement: Supplemental_Dataset_S8.xlsx [file Supplemental_Dataset_S8.xlsx]

## Sheet: Dawn C0 DEGs
Dataset S8. Differentially Expressed Genes for Dawn Cluster 0
Genes showing significant differential expression (log2FC>1 & p_val_adj <0.05 & PCT1 > 10%) in the given cluster versus all other cells in the dawn dataset
PCT1: Percentage of cells within the cluster expressing the gene
PCT2: Percentage of cells outside the cluster expressing the gene
Gene	Ave. Log2 FC	p Value	p Value Adj.	PCT1	PCT2	Arabidopsis orthologues	Arabidopsis gene names	Arabidopsis gene description
Wa8730a008g001000	3.62146	2.07465e-249	2.89247e-245	0.957	0.283
Wa8730a003g005480	3.44524	1.09881e-202	1.53196e-198	0.957	0.444
Wa8730a008g001340	3.31846	2.11e-194	2.94176e-190	0.906	0.334
Wa8730a008g000620	3.31208	1.57496e-223	2.19581e-219	0.99	0.49
Wa8730a014g002180	2.75765	3.78282e-261	5.274e-257	0.845	0.104
Wa8730a012g004900	2.73926	1.13009e-250	1.57557e-246	0.82	0.1	AT5G10180 AT1G78000 AT4G08620 AT1G22150	AST68, SULTR2 1 SEL1, SULTR1 2 SULTR1 1 SULTR1 3	Encodes a low-affinity sulfate transporter expressed in the root cap and central cylinder, where it is induced by sulfur starvation. Expression in the shoot vascular system is not induced by sulfur starvation. Encodes a sulfate transporter that can restore sulfate uptake capacity of a yeast mutant lacking sulfate transporter genes. Encodes a sulfate transporter. Contains STAS domain. Expressed in…
Wa8730a014g002170	2.66095	1.40043e-247	1.95249e-243	0.882	0.136
Wa8730a001g000280	2.62577	1.29884e-240	1.81084e-236	0.835	0.122	AT3G12500 AT4G01700 AT1G02360	ATHCHIB, B-CHI, CHI-B, HCHIB, PR-3, PR3	encodes a basic chitinase involved in ethylene/jasmonic acid mediated signalling pathway during systemic acquired resistance based on expression analyses. Chitinase family protein Chitinase family protein
Wa8730a009g003530	2.39656	1.75716e-173	2.44983e-169	1	0.907	AT2G38530	LP2, LTP2, cdf3	Involved in lipid transfer between membranes. Belongs to a family of Lipid transfer proteins. Sequence similarity to other plant/Arabidopsis LPT genes but highest similarity to LPT1. Stress and pathogen-inducible motifs found in the upstream region. Expressed in flower, leaves and siliques but absent in roots. Predicted to be a member of PR-14 pathogenesis-related protein family with the followin…
Wa8730a001g007090	2.22736	9.65349e-82	1.34589e-77	0.369	0.061	AT2G41480 AT5G05340	AtPRX25, PRX25 PRX52	Encodes a cationic cell-wall-bound peroxidase homolog that is involved in the lignification of cell walls. Encodes a protein with sequence similarity to peroxidases that is involved in lignin biosynthesis. Loss of function mutations show abnormal development of xylem fibers and reduced levels of lignin biosynthetic enxymes.
Wa8730a006g002120	2.19426	4.62476e-169	6.44783e-165	0.955	0.598	AT5G50200 AT4G24715	ATNRT3.1, NRT3.1, WR3 NA	Wound-responsive gene 3 (WR3). Encodes a high-affinity nitrate transporter. Up-regulated by nitrate. Involved in jasmonic acid-independent wound signal transduction. NA
Wa8730a016g003520	2.17524	1.98658e-146	2.76969e-142	0.898	0.474	AT5G37600 AT3G17820 AT5G35630 AT1G66200 AT5G16570 AT1G48470	ATGLN1 1, ATGSR1, GLN1 1, GSR ATGSKB6, GLN1.3, GLN1 3 ATGSL1, GLN2, GS2 ATGSR2, GLN1 2, GSR2 GLN1 4 GLN1 5	encodes a cytosolic glutamine synthetase, the enzyme has high affinity with substrate ammonium encodes a cytosolic glutamine synthetase, the enzyme has low affinity with substrate ammonium chloroplastic glutamine synthetase encodes a cytosolic glutamate synthetase, this enzyme has low affinity with substrate ammonium Encodes a cytosolic glutamine synthetase, the enzyme has high affinity with subs…
Wa8730a001g011180	2.0048	2.29013e-168	3.1929e-164	0.741	0.151	AT5G02540 AT2G37540 AT4G11410		NAD(P)-binding Rossmann-fold superfamily protein NAD(P)-binding Rossmann-fold superfamily protein NAD(P)-binding Rossmann-fold superfamily protein
Wa8730a009g004310	1.99518	2.11116e-160	2.94338e-156	0.6	0.084	AT1G02335 AT3G62020 AT1G09560 AT3G05930 AT3G04200	GL22, PDGLP2 GLP10 GLP5, PDGLP1 GLP8	Encodes a plasodesmata-located protein involved in regulating primary root growth by controlling phloem-mediated allocation of resources between the primary and lateral root meristems. germin-like protein (GLP10) germin-like protein (GLP5) germin-like protein (GLP8) RmlC-like cupins superfamily protein
Wa8730a012g002610	1.92369	1.69455e-134	2.36254e-130	0.563	0.088	AT5G04180	ACA3, ATACA3	alpha carbonic anhydrase 3
Wa8730a008g003840	1.88941	1.11773e-104	1.55834e-100	0.555	0.122	AT4G19690 AT3G12750 AT2G30080 AT1G31260 AT2G32270 AT1G05300 AT2G04032	ATIRT1, IRT1 AtZIP1, ZIP1 ATZIP6, ZIP6 ZIP10 ZIP3 ZIP5 ZIP7	Fe(II) transport protein (IRT1) A member of Zrt- and Irt-related protein (ZIP) family. transcript is induced in response to zinc deficiency in the root. member of Fe(II) transporter isolog family. Gene expression is not regulated by iron, copper, or zinc deficiency or excess. member of Fe(II) transporter isolog family A member of Zrt- and Irt-related protein (ZIP) family. transcript is induced in…
Wa8730a007g008670	1.88902	6.6899e-113	9.32706e-109	0.745	0.258	AT3G29260 AT4G03140		NAD(P)-binding Rossmann-fold superfamily protein NAD(P)-binding Rossmann-fold superfamily protein
Wa8730a020g000810	1.88499	7.87578e-132	1.09804e-127	0.867	0.335	AT3G52720 AT2G28210 AT5G04180 AT1G08080	ACA1, ATACA1, CAH1 ACA2, ATACA2 ACA3, ATACA3 ACA7, ATACA7	Encodes a putative alpha carbonic anhydrase (CAH1) located in the chloroplast stroma. Most chloroplast proteins are encoded by the nuclear genome and imported with the help of sorting signals that are intrinsic parts of the polypeptides. CAH1 takes an alternative route through the secretory pathway, and becomes N-glycosylated before entering the chloroplast. alpha carbonic anhydrase 2 alpha carbo…
Wa8730a001g006060	1.85937	1.11972e-128	1.56112e-124	0.694	0.189	AT3G10960	ATAZG1, AZG1	Encodes a homolog of the adenine-guanine-hypoxanthine transporter AzgA of Aspergillus nidulans. Function as a plant adenine-guanine transporter. Two closely related genes exist in Arabidopsis: AT3G10960 (Azg1) and AT5G50300 (Azg2).
Wa8730a015g000910	1.8351	8.11325e-106	1.13115e-101	0.402	0.048	AT4G31500 AT5G07990	ATR4, CYP83B1, RED1, RNT1, SUR2 CYP75B1, D501, TT7	Encodes an oxime-metabolizing enzyme in the biosynthetic pathway of glucosinolates. Is required for phytochrome signal transduction in red light. Mutation confers auxin overproduction. Required for flavonoid 3' hydroxylase activity.
Wa8730a008g000460	1.81565	8.3985e-64	1.17092e-59	0.718	0.386
Wa8730a020g002990	1.77893	2.01033e-142	2.80281e-138	0.959	0.725	AT1G13440 AT3G04120 AT1G79530 AT1G16300	GAPC-2, GAPC2 GAPC, GAPC-1, GAPC1 GAPCP-1 GAPCP-2	The expression level of GAPC-2 is upregulated in Arabidopsis seedlings exposed to cadmium. encodes cytosolic GADPH (C subunit) involved in the glycolytic pathway but also interacts with H2O2 potentially placing it in a signalling cascade induced by ROS. Encodes one of the chloroplast/plastid localized GAPDH isoforms (GAPCp1/At1g79530 and GAPCp2/At1g16300). gapcp double mutants display a drastic p…
Wa8730a010g000090	1.76909	6.60667e-105	9.21103e-101	0.816	0.396
Wa8730a004g001070	1.73516	2.83719e-108	3.95561e-104	0.824	0.396	AT5G60770 AT1G12940	ATNRT2.4, NRT2.4 ATNRT2.5, NRT2.5	member of High affinity nitrate transporter family member of High affinity nitrate transporter family
Wa8730a009g003160	1.71001	8.68837e-124	1.21133e-119	0.561	0.099
Wa8730a013g005830	1.65378	5.16417e-122	7.19989e-118	0.898	0.558	AT1G04410	c-NAD-MDH1	predicted to encode a cytosolic malate dehydrogenase.
Wa8730a016g002860	1.5849	1.15331e-104	1.60794e-100	0.788	0.297	AT1G68610 AT3G18470 AT1G49030	PCR11	Target promoter of the male germline-specific transcription factor DUO1. PLAC8 family protein PLAC8 family protein
Wa8730a006g003200	1.58465	1.35774e-124	1.89296e-120	0.478	0.062
Wa8730a014g001670	1.54063	9.08555e-126	1.26671e-121	0.457	0.052
Wa8730a003g001030	1.50148	7.95623e-91	1.10926e-86	0.847	0.486	AT2G16060	AHB1, ARATH, ATGLB1, GLB1, HB1, NSHB1	Encodes a class 1 nonsymbiotic hemoglobin induced by low oxygen levels with very high oxygen affinity. It is not likely to be a hemoglobin transporter because of its extremely high affinity for oxygen.
Wa8730a017g002540	1.49935	3.523e-112	4.91176e-108	0.865	0.421	AT2G45960 AT3G61430 AT1G01620 AT4G00430 AT4G23400 AT2G37170 AT2G39010 AT4G35100 AT2G16850	ATHH2, PIP1 2, PIP1B, TMP-A ATPIP1, PIP1, PIP1 1, PIP1A PIP1 3, PIP1C, TMP-B PIP1 4, PIP1E, TMP-C PIP1 5, PIP1D PIP2 2, PIP2B PIP2 6, PIP2E PIP2 7, PIP3, PIP3A, SIMIP PIP2 8, PIP3B	a member of the plasma membrane intrinsic protein subfamily PIP1. localizes to the plasma membrane and exhibits water transport activity in Xenopus oocyte. expressed ubiquitously and protein level decreases slightly during leaf development. a member of the plasma membrane intrinsic protein subfamily PIP1. localizes to the plasma membrane and exhibits water transport activity in Xenopus oocyte. ex…
Wa8730a020g000340	1.45545	6.20502e-80	8.65103e-76	0.924	0.64
Wa8730a014g002160	1.43009	5.15708e-121	7.19e-117	0.557	0.089
Wa8730a006g004140	1.41348	1.35973e-82	1.89574e-78	0.329	0.04	AT2G41480 AT5G64120 AT5G66390 AT1G05260 AT2G22420 AT2G34060 AT3G21770 AT5G15180 AT5G39580 AT1G49570 AT1G14550	AtPRX25, PRX25 AtPRX71, PRX71 PRX72 RCI3, RCI3A	Encodes a cationic cell-wall-bound peroxidase homolog that is involved in the lignification of cell walls. encodes a cell wall bound peroxidase that is induced by hypo-osmolarity Encodes a peroxidase that is involved in lignin biosynthesis. Encodes a cold-inducible cationic peroxidase that is involved in the stress response. In response to low temperature, RCI3 transcripts accumulate in the aeria…
Wa8730a006g001340	1.41113	3.70961e-71	5.17194e-67	0.771	0.456	AT1G79550	PGK	Encodes cytosolic phosphoglycerate kinase (PGK).
Wa8730a001g007820	1.40382	1.4972e-75	2.0874e-71	0.651	0.26	AT2G18960 AT1G17260 AT5G62670 AT4G30190 AT5G57350 AT2G24520 AT2G07560 AT1G80660	AHA1, HA1, OST2, PMA AHA10 AHA11, HA11 AHA2, HA2, PMA2 AHA3, ATAHA3, HA3 AHA5, HA5 AHA6, HA6 AHA9, HA9	Encodes a plasma membrane proton ATPase. Mutants have a reduced ability to close their stomata in response to drought and are affected in stomatal but not seed responsiveness to ABA. belongs to H+-APTase gene family, involved in proanthocyanidin biosynthesis, disturbs the vacuolar biogenesis and acidification process H(+)-ATPase 11 belongs to the P-type ATPase superfamily of cation-transporting A…
Wa8730a003g005380	1.32862	7.73812e-68	1.07885e-63	0.329	0.057	AT3G46860 AT5G43570		Predicted to encode a PR (pathogenesis-related) peptide that belongs to the PR-6 proteinase inhibitor family. Six putative PR-6-type protein encoding genes are found in Arabidopsis: At2g38900, At2g38870, At5g43570, At5g43580, At3g50020 and At3g46860. Predicted to encode a PR (pathogenesis-related) peptide that belongs to the PR-6 proteinase inhibitor family. Six putative PR-6-type protein encodin…
Wa8730a002g001530	1.32708	2.75964e-75	3.84749e-71	0.761	0.337	AT4G24130		Protein of unknown function, DUF538
Wa8730a001g007510	1.32702	3.5584e-86	4.96112e-82	0.853	0.667	AT1G51650		ATP synthase epsilon chain, mitochondrial
Wa8730a005g001430	1.30874	6.52646e-94	9.09919e-90	0.486	0.095	AT1G13140 AT4G39490 AT5G02900 AT4G32170 AT5G52320 AT2G21910 AT1G47620	CYP86C3 CYP96A10 CYP96A13 CYP96A2 CYP96A4 CYP96A5 CYP96A8	member of CYP86C member of CYP96A member of CYP96A member of CYP96A member of CYP96A member of CYP96A member of CYP96A
Wa8730a004g007210	1.30291	3.67578e-57	5.12477e-53	0.592	0.245	AT5G45650 AT4G15040		subtilase family protein Subtilisin-like serine endopeptidase family protein
Wa8730a003g000980	1.27258	1.68087e-78	2.34347e-74	0.82	0.456	AT2G22860 AT3G49780 AT4G37720	ATPSK2, PSK2 ATPSK3, ATPSK4, PSK4 ATPSK6, PSK6	Phytosulfokine 2 precursor, coding for a unique plant peptide growth factor. Phytosulfokine 3 precursor, coding for a unique plant peptide growth factor. Plants overexpressing this gene (under a 35S promoter), develop normal cotyledons and hypocotyls but their growth, in particular that of their roots, was faster than that of wildtype. Probable phytosulfokines 6 precursor, coding for a unique pla…
Wa8730a001g010580	1.26034	5.67109e-49	7.90663e-45	0.284	0.059	AT3G09590 AT4G33720 AT4G31470		CAP (Cysteine-rich secretory proteins, Antigen 5, and Pathogenesis-related 1 protein) superfamily protein CAP (Cysteine-rich secretory proteins, Antigen 5, and Pathogenesis-related 1 protein) superfamily protein CAP (Cysteine-rich secretory proteins, Antigen 5, and Pathogenesis-related 1 protein) superfamily protein
Wa8730a006g003620	1.25051	3.11118e-84	4.3376e-80	0.484	0.107	AT3G48780	ATSPT1, SPT1	Encodes one of the two LCB2 subunits (LCB2a and LCB2b) of serine palmitoyltransferase, an enzyme involved in sphingolipid biosynthesis. LCB2a and LCB2b are functional redundant. Double mutants are gametophytic lethal.
Wa8730a010g000690	1.24659	6.58894e-88	9.18631e-84	0.378	0.052	AT4G31800 AT4G22070	ATWRKY18, WRKY18 ATWRKY31, WRKY31	Pathogen-induced transcription factor. Binds W-box sequences in vitro. Forms protein complexes with itself and with WRKY40 and WRKY60. Constitutive expression of WRKY18 enhanced resistance to P. syringae, but its coexpression with WRKY40 or WRKY60 made plants more susceptible to both P. syringae and B. cinerea. WRKY18, WRKY40, and WRKY60 have partially redundant roles in response to the hemibiotr…
Wa8730a007g005010	1.22695	3.88522e-65	5.41677e-61	0.788	0.455	AT1G09400		FMN-linked oxidoreductases superfamily protein
Wa8730a009g000440	1.22672	2.94456e-61	4.1053e-57	0.798	0.576	AT3G55440	ATCTIMC, CYTOTPI, TPI	Encodes triosephosphate isomerase.
Wa8730a016g002960	1.22507	2.96275e-86	4.13066e-82	0.884	0.712	AT1G22300 AT5G10450 AT1G78300 AT4G09000 AT1G26480 AT5G16050 AT3G02520	14-3-3EPSILON, GF14, GRF10 14-3-3lambda, AFT1, GRF6 14-3-3OMEGA, GF14, GRF2 GF14, GRF1 GF14, GRF12 GF14, GRF5 GF14, GRF7	Encodes a 14-3-3 protein. This protein is reported to interact with the BZR1 transcription factor involved in brassinosteroid signaling and may affect the nucleocytoplasmic shuttling of BZR1 Encodes a member of the 14-3-3 gene family that is a lambda isoform (14-3-3&#955 ). Interacts with APX3 (ascorbate peroxidase) and AKR2 , suggesting a role in mediating oxidative metabolism in stress response…
Wa8730a007g003770	1.21513	6.769e-68	9.43734e-64	0.745	0.353	AT1G78460		SOUL heme-binding family protein
Wa8730a016g000390	1.20347	2.29139e-94	3.19466e-90	0.449	0.077
Wa8730a009g003220	1.20217	2.25846e-57	3.14875e-53	0.327	0.065
Wa8730a003g008800	1.18208	1.23486e-86	1.72165e-82	0.384	0.058	AT1G08465	YAB2	Member of the YABBY family of Arabidopsis proteins involved in the abaxial cell fate specification in lateral organs
Wa8730a012g000820	1.17241	1.12047e-65	1.56216e-61	0.778	0.502	AT1G71950		SPI-1 is a member of the I9 inhibitor family. It is an inhibitor of SBT4.13 subtilase.
Wa8730a001g007430	1.16017	4.69626e-62	6.54753e-58	0.614	0.26	AT4G25850 AT5G57240	ORP4B ORP4C	OSBP(oxysterol binding protein)-related protein 4B OSBP(oxysterol binding protein)-related protein 4C
Wa8730a007g007580	1.15749	4.85854e-48	6.77378e-44	0.484	0.192
Wa8730a015g002300	1.15167	6.43069e-53	8.96567e-49	0.667	0.371	AT5G13500 AT5G25265 AT2G25260
Wa8730a004g006820	1.12677	9.87305e-30	1.3765e-25	0.684	0.469	AT5G44130	FLA13	FASCICLIN-like arabinogalactan protein 13 precursor
Wa8730a014g002860	1.12303	3.70567e-73	5.16645e-69	0.435	0.101	AT2G45190 AT1G08465 AT2G26580	AFO, FIL, YAB1 YAB2 YAB5	Encodes a member of the YABBY family of transcriptional regulators that is involved in abaxial cell type specification in leaves and fruits. YAB1 acts in a non-cell autonomous fashion within the meristem to affect phyllotactic patterning. The non-autonomous effect on the central region of the meristem is mediated through the activity if Lateral Suppressor (LAS). Member of the YABBY family of Arab…
Wa8730a007g000220	1.107	3.79069e-45	5.28498e-41	0.616	0.337
Wa8730a014g001120	1.07827	1.80644e-56	2.51854e-52	0.367	0.085
Wa8730a003g008790	1.06947	2.82592e-58	3.93989e-54	0.465	0.148	AT5G06440 AT3G11720		Polyketide cyclase/dehydrase and lipid transport superfamily protein
Wa8730a020g003020	1.0663	2.52338e-42	3.51809e-38	0.614	0.325	AT1G24400 AT5G40780 AT1G67640 AT3G01760	AATL2, ATLHT2, LHT2 LHT1	High-affinity transporter for neutral and acidic amino acids, expressed in tapetum tissue of anthers Encodes LHT1 (lysine histidine transporter), a high-affinity transporter for cellular amino acid uptake in both root epidermis and leaf mesophyll. Transmembrane amino acid transporter family protein Encodes an amino acid transporter expressed in the root that is involved in the uptake of acidic am…
Wa8730a002g007680	1.06235	4.82311e-44	6.72438e-40	0.661	0.375	AT5G23760		Copper transport protein family
Wa8730a004g002520	1.05424	2.23339e-46	3.1138e-42	0.71	0.475	AT2G31490
Wa8730a020g001670	1.0532	4.8534e-35	6.76661e-31	0.504	0.261	AT5G63400 AT4G25280 AT5G50370	ADK1	encodes a protein similar to adenylate kinase. P-loop containing nucleoside triphosphate hydrolases superfamily protein Adenylate kinase family protein
Wa8730a019g001950	1.04541	9.62199e-42	1.3415e-37	0.629	0.39	AT3G12260		LYR family of Fe/S cluster biogenesis protein
Wa8730a016g001330	1.03415	9.51118e-50	1.32605e-45	0.559	0.232	AT1G22250 AT4G08910 AT1G78170
Wa8730a009g005900	1.01976	6.11043e-42	8.51916e-38	0.639	0.377	AT1G49160	WNK7	Encodes a member of the WNK family (9 members in all) of protein kinases, the structural design of which is clearly distinct from those of other known protein kinases, such as receptor-like kinases and mitogen-activated protein kinases. Its
Wa8730a020g002340	1.01702	9.01088e-62	1.2563e-57	0.861	0.707	AT1G22840	ATCYTC-A, CYTC-1	Encodes cytochrome c. Contains two site II (TGGGCC/T) elements, which interact with a TCP-domain transcription factor, and a downstream internal telomeric repeat, and are required for expression of the Cytc-1 gene. Promoter directs preferential expression in root and shoot meristems and in anthers.
Wa8730a005g006790	1.01431	2.80613e-78	3.91231e-74	0.947	0.831	AT5G63030 AT5G40370	GRXC1 GRXC2	Thioredoxin superfamily protein Glutaredoxin family protein
Wa8730a006g007340	1.01395	7.71509e-36	1.07564e-31	0.322	0.104	AT1G17290 AT1G72330	AlaAT1 ALAAT2	Encodes for alanine aminotransferase (ALAAT1), involved in alanine catabolism during plants recovery from hypoxia Encodes for alanine aminotransferase ALAAT2.
Wa8730a019g003860	1.0102	3.44498e-44	4.80299e-40	0.751	0.545
Wa8730a013g005820	1.00774	2.31448e-40	3.22685e-36	0.439	0.178	AT3G54690	SETH3	Sugar isomerase (SIS) family protein

## Sheet: Dawn C1 DEGs
Dataset S8. Differentially Expressed Genes for Dawn Cluster 1
Genes showing significant differential expression (log2FC>1 & p_val_adj <0.05 & PCT1 > 10%) in the given cluster versus all other cells in the dawn dataset
PCT1: Percentage of cells within the cluster expressing the gene
PCT2: Percentage of cells outside the cluster expressing the gene
Gene	Ave. Log2 FC	p Value	p Value Adj.	PCT1	PCT2	Arabidopsis orthologues	Arabidopsis gene names	Arabidopsis gene description
Wa8730a009g001610	2.76054	2.37132e-172	3.30609e-168	0.943	0.274	AT5G59320	LTP3	Predicted to encode a PR (pathogenesis-related) protein. Belongs to the lipid transfer protein (PR-14) family with the following members: At2g38540/LTP1, At2g38530/LTP2, At5g59320/LTP3, At5g59310/LTP4, At3g51600/LTP5, At3g08770/LTP6, At2g15050/LTP7, At2g18370/LTP8, At2g15325/LTP9, At5g01870/LTP10, At4g33355/LTP11, At3g51590/LTP12, At5g44265/LTP13, At5g62065/LTP14, At4g08530/LTP15.
Wa8730a008g003430	2.57429	1.57568e-83	2.19681e-79	0.598	0.166
Wa8730a008g000530	2.46707	3.47064e-135	4.83877e-131	0.77	0.192
Wa8730a001g001120	2.40453	5.4151e-169	7.54974e-165	0.91	0.211
Wa8730a005g008830	2.35305	3.46422e-148	4.82982e-144	0.981	0.505	AT1G30020		Protein of unknown function, DUF538
Wa8730a006g005060	2.21436	1.14588e-148	1.59759e-144	0.883	0.232	AT5G15290 AT1G14160	CASP5	Uncharacterised protein family (UPF0497) Uncharacterised protein family (UPF0497)
Wa8730a008g000650	2.17939	6.90295e-155	9.62409e-151	0.992	0.598
Wa8730a014g001620	2.16599	4.39347e-129	6.12538e-125	0.732	0.159
Wa8730a016g003000	2.10123	1.08157e-144	1.50793e-140	0.997	0.513	AT1G68530 AT1G25450 AT2G26640 AT1G19440 AT1G71160	CER6, CUT1, G2, KCS6, POP1 CER60, KCS5 KCS11 KCS4 KCS7	Encodes KCS6, a member of the 3-ketoacyl-CoA synthase family involved in the biosynthesis of VLCFA (very long chain fatty acids). Encodes KCS5, a member of the 3-ketoacyl-CoA synthase family involved in the biosynthesis of VLCFA (very long chain fatty acids). Encodes KCS11, a member of the 3-ketoacyl-CoA synthase family involved in the biosynthesis of VLCFA (very long chain fatty acids). Encodes …
Wa8730a004g002220	2.04342	6.93731e-76	9.672e-72	0.514	0.125	AT5G55620 AT5G41761
Wa8730a015g005520	2.00599	2.02787e-159	2.82726e-155	0.888	0.179
Wa8730a009g003660	2.00407	4.06355e-43	5.66541e-39	0.571	0.266	AT2G38530	LP2, LTP2, cdf3	Involved in lipid transfer between membranes. Belongs to a family of Lipid transfer proteins. Sequence similarity to other plant/Arabidopsis LPT genes but highest similarity to LPT1. Stress and pathogen-inducible motifs found in the upstream region. Expressed in flower, leaves and siliques but absent in roots. Predicted to be a member of PR-14 pathogenesis-related protein family with the followin…
Wa8730a001g007340	2.00252	1.85852e-146	2.59114e-142	0.913	0.24	AT2G18800 AT2G06850 AT4G30270 AT4G14130 AT4G25810 AT5G57550	ATXTH21, XTH21 EXGT-A1, EXT, XTH4 MERI-5, MERI5B, SEN4, XTH24 XTH15, XTR7 XTH23, XTR6 XTH25, XTR3	xyloglucan endotransglucosylase/hydrolase 21 endoxyloglucan transferase (EXGT-A1) gene encodes a protein similar to endo xyloglucan transferase in sequence. It is also very similar to BRU1 in soybean, which is involved in brassinosteroid response. xyloglucan endotransglycosylase-related protein (XTR7) xyloglucan endotransglycosylase-related protein (XTR6) xyloglucan endotransglycosylase-related p…
Wa8730a004g007430	1.98059	3.33467e-125	4.6492e-121	0.981	0.667
Wa8730a009g005630	1.9578	1.43879e-126	2.00596e-122	0.964	0.678
Wa8730a003g005060	1.93604	1.95641e-123	2.72762e-119	0.719	0.15	AT1G68530 AT1G25450 AT2G26640 AT4G34510 AT5G43760 AT1G19440	CER6, CUT1, G2, KCS6, POP1 CER60, KCS5 KCS11 KCS17 KCS20 KCS4	Encodes KCS6, a member of the 3-ketoacyl-CoA synthase family involved in the biosynthesis of VLCFA (very long chain fatty acids). Encodes KCS5, a member of the 3-ketoacyl-CoA synthase family involved in the biosynthesis of VLCFA (very long chain fatty acids). Encodes KCS11, a member of the 3-ketoacyl-CoA synthase family involved in the biosynthesis of VLCFA (very long chain fatty acids). Encodes …
Wa8730a014g001630	1.93238	3.4899e-127	4.86562e-123	0.792	0.185
Wa8730a007g004260	1.90293	2.51278e-78	3.50331e-74	0.475	0.103	AT4G08910 AT1G22250 AT1G78170
Wa8730a001g011170	1.90014	1.32725e-101	1.85045e-97	0.743	0.249	AT5G02540 AT2G37540 AT4G11410		NAD(P)-binding Rossmann-fold superfamily protein NAD(P)-binding Rossmann-fold superfamily protein NAD(P)-binding Rossmann-fold superfamily protein
Wa8730a017g001990	1.87115	8.87461e-103	1.2373e-98	0.762	0.243
Wa8730a016g002030	1.83568	3.00124e-87	4.18433e-83	0.77	0.355
Wa8730a008g004660	1.82508	7.83882e-32	1.09289e-27	0.232	0.056
Wa8730a005g003480	1.81554	2.33443e-84	3.25466e-80	0.623	0.171	AT5G25610	ATRD22, RD22	responsive to dehydration 22 (RD22) mediated by ABA
Wa8730a017g004030	1.80032	1.09665e-127	1.52895e-123	0.997	0.798
Wa8730a009g001730	1.7545	2.20143e-102	3.06923e-98	0.877	0.385	AT2G41290 AT1G08470 AT3G57030 AT3G51440	SSL2 SSL3	Although this enzyme is predicted to encode a strictosidine synthase (SS), it lacks a conserved catalytic glutamate residue found in active SS enzymes and it is not expected to have SS activity. Although this enzyme is predicted to encode a strictosidine synthase (SS), it lacks a conserved catalytic glutamate residue found in active SS enzymes and it is not expected to have SS activity. Calcium-d…
Wa8730a013g001880	1.74703	7.6032e-68	1.06004e-63	0.549	0.159	AT1G07240	UGT71C5	Encodes a UDP-glucosyltransferase that plays a role in abscisic acid (ABA) glucosylation from ABA to ABA-glucose ester and regulates ABA homeostasis, thereby influencing the ABA signal network.
Wa8730a012g004670	1.73433	3.92826e-63	5.47679e-59	0.522	0.155	AT4G39980 AT4G33510 AT1G22410	DHS1 DHS2	Encodes a 2-deoxy-D-arabino-heptulosonate 7-phosphate (DAHP) synthase, which catalyzes the first committed step in aromatic amino acid biosynthesis. Gene expression is induced by wounding and pathogenic bacteria Pseudomonas syringae. Enzyme catalyzing the first committed step in aromatic amino acid biosynthesis Class-II DAHP synthetase family protein
Wa8730a019g001620	1.7342	5.14109e-85	7.16771e-81	0.598	0.158	AT3G66658 AT1G44170	ALDH22A1 ALDH3H1, ALDH4	Encodes a putative aldehyde dehydrogenase. The gene is not responsive to osmotic stress and is expressed constitutively at a low level in plantlets and root cultures. Encodes a protein similar to the aldehyde dehydrogenase cp-ADH from C.plantagineum. Constitutively expressed at low levels.
Wa8730a020g002750	1.71724	1.7639e-78	2.45923e-74	0.568	0.151	AT1G67730 AT1G24470	ATKCR1, KCR1, YBR159 ATKCR2, KCR2	Encodes one of the two Arabidopsis homologues to YBR159w encoding a S. cerevisiae beta-ketoacyl reductase (KCR), which catalyzes the first reduction during VLCFA (very long chain fatty acids, >18 carbon) elongation: KCR1 (At1g67730), KCR2 (At1g24470). Complementation of the yeast ybr159Delta mutant demonstrated that the two KCR proteins are divergent and that only AtKCR1 can restore heterologous …
Wa8730a012g004550	1.71391	3.24175e-102	4.51964e-98	0.932	0.623	AT4G24380 AT5G65400		alpha/beta-Hydrolases superfamily protein
Wa8730a001g004950	1.69739	4.43594e-94	6.18459e-90	0.787	0.292
Wa8730a006g004490	1.62012	2.74548e-67	3.82775e-63	0.667	0.28	AT1G24470	ATKCR2, KCR2	Encodes one of the two Arabidopsis homologues to YBR159w encoding a S. cerevisiae beta-ketoacyl reductase (KCR), which catalyzes the first reduction during VLCFA (very long chain fatty acids, >18 carbon) elongation: KCR1 (At1g67730), KCR2 (At1g24470). Complementation of the yeast ybr159Delta mutant demonstrated that the two KCR proteins are divergent and that only AtKCR1 can restore heterologous …
Wa8730a008g000170	1.61586	7.04761e-33	9.82578e-29	0.279	0.077
Wa8730a009g002200	1.58686	2.57682e-58	3.59261e-54	0.473	0.145	AT3G05020 AT5G27200	ACP, ACP1 ACP5	encodes an acyl carrier protein expressed in leaves, roots, and dry seeds. Protein is not regulated by light. encodes an acyl carrier protein
Wa8730a008g000640	1.58525	7.67466e-66	1.07e-61	0.454	0.117
Wa8730a015g003690	1.57405	5.44378e-57	7.58972e-53	0.484	0.156	AT3G07680	p24beta2	Encodes an Golgi-localized p24 protein. Interacts with p24delta5 at ER export sites for ER exit and coupled transport to the Golgi apparatus. The mRNA is cell-to-cell mobile.
Wa8730a018g000750	1.5727	1.01552e-60	1.41583e-56	0.522	0.156	AT3G55120	A11, AtCHI, CFI, CHI, TT5	Catalyzes the conversion of chalcones into flavanones. Required for the accumulation of purple anthocyanins in leaves and stems.
Wa8730a005g004920	1.55098	7.50688e-50	1.04661e-45	0.396	0.102
Wa8730a020g001820	1.53279	2.49027e-73	3.47194e-69	0.869	0.632	AT1G22530	PATL2	PATELLIN 2
Wa8730a009g003340	1.53215	1.7192e-48	2.3969e-44	0.579	0.264	AT3G54180 AT2G38620 AT1G09600	CDC2B, CDKB1 1 CDKB1 2	Arabidopsis homolog of yeast cdc2, a protein kinase (cyclin-dependent kinase) that plays a central role in control of the mitotic cell cycle. Encodes a member of a plant specific family of cyclin dependent kinases. Protein kinase superfamily protein
Wa8730a015g005080	1.48892	4.44317e-63	6.19467e-59	0.53	0.155
Wa8730a019g001770	1.47892	9.08453e-64	1.26657e-59	0.825	0.54
Wa8730a008g003780	1.46466	8.54667e-71	1.19158e-66	0.831	0.44	AT4G19690 AT3G12750 AT2G30080 AT1G31260 AT2G32270 AT1G05300 AT2G04032	ATIRT1, IRT1 AtZIP1, ZIP1 ATZIP6, ZIP6 ZIP10 ZIP3 ZIP5 ZIP7	Fe(II) transport protein (IRT1) A member of Zrt- and Irt-related protein (ZIP) family. transcript is induced in response to zinc deficiency in the root. member of Fe(II) transporter isolog family. Gene expression is not regulated by iron, copper, or zinc deficiency or excess. member of Fe(II) transporter isolog family A member of Zrt- and Irt-related protein (ZIP) family. transcript is induced in…
Wa8730a018g002220	1.4567	1.9028e-51	2.65288e-47	0.727	0.466	AT2G47485
Wa8730a009g005650	1.45584	4.66164e-39	6.49925e-35	0.631	0.398	AT1G27350		Ribosome associated membrane protein RAMP4
Wa8730a012g001710	1.43542	3.1414e-45	4.37973e-41	0.44	0.148	AT5G63790	ANAC102, NAC102	Encodes a member of the NAC family of transcription factors. ANAC102 appears to have a role in mediating response to low oxygen stress (hypoxia) in germinating seedlings.
Wa8730a001g010900	1.4337	1.32059e-42	1.84117e-38	0.628	0.356	AT5G16710	DHAR3	The protein undergoes thiolation following treatment with the oxidant tert-butylhydroperoxide.
Wa8730a014g005820	1.4274	2.78463e-77	3.88233e-73	0.713	0.236	AT3G10280 AT4G34510 AT1G04220 AT5G43760 AT1G19440 AT2G16280	KCS14 KCS17 KCS2 KCS20 KCS4 KCS9	Encodes KCS14, a member of the 3-ketoacyl-CoA synthase family involved in the biosynthesis of VLCFA (very long chain fatty acids). Encodes KCS17, a member of the 3-ketoacyl-CoA synthase family involved in the biosynthesis of VLCFA (very long chain fatty acids). Encodes KCS2, a member of the 3-ketoacyl-CoA synthase family involved in the biosynthesis of VLCFA (very long chain fatty acids). Encodes…
Wa8730a003g003400	1.40636	1.93345e-41	2.69561e-37	0.393	0.128	AT4G16442		Uncharacterised protein family (UPF0497)
Wa8730a010g004880	1.40191	5.93868e-47	8.27971e-43	0.721	0.489	AT5G55850 AT5G63270 AT5G40645	NOI	NOI protein RPM1-interacting protein 4 (RIN4) family protein RPM1-interacting protein 4 (RIN4) family protein
Wa8730a002g009150	1.38896	5.7291e-65	7.98751e-61	0.516	0.135	AT1G65060 AT4G19010	4CL3	encodes an isoform of 4-coumarate:CoA ligase (4CL), which is involved in the last step of the general phenylpropanoid pathway. mRNA levels are not induced in response to wounding or to fungal infection by P. parasitica. mRNA is expressed in flowers, to a lesser degree in mature leaves and siliques and marginally in seedling roots and bolting stems of mature plants. The catalytic efficiency was in…
Wa8730a008g003960	1.36375	6.83576e-30	9.53041e-26	0.708	0.463
Wa8730a018g003530	1.36289	8.4993e-38	1.18497e-33	0.596	0.33	AT1G60810 AT1G09430	ACLA-2 ACLA-3	One of the three genes encoding subunit A of the trimeric enzyme ATP Citrate lyase Encodes subunit A of the heteromeric enzyme ATP citrate lyase (ACL). In animals, ACL is encoded by a single gene ACL in Arabidopsis is composed of two polypeptides, ACLA (encoded by 3 genes) and ACLB (encoded by 2 genes). The holoenzyme has an A(4)B(4)stoichiometry. Expression of both ACLA and ACLB but not of eithe…
Wa8730a015g004980	1.35909	7.42417e-43	1.03508e-38	0.691	0.437	AT4G34135 AT2G15490 AT1G24100 AT2G23250	UGT73B2 UGT73B4 UGT74B1 UGT84B2	The At4g34135 gene encodes a flavonol 7-O-glucosyltransferase (EC 2.4.1.237) that glucosylates also with a 20 fold lower activity flavonols (kaempferol and quercetin) at the 3-O-position. UDP-glycosyltransferase 73B4 Encodes a UDP-glucose:thiohydroximate S-glucosyltransferase, involved in glucosinolate biosynthesis UDP-glucosyl transferase 84B2
Wa8730a014g005310	1.35612	1.68272e-23	2.34605e-19	0.464	0.265	AT5G24530 AT4G16770 AT4G10490 AT4G25310	DMR6	Encodes a putative 2OG-Fe(II) oxygenase that is defense-associated but required for susceptibility to downy mildew. 2-oxoglutarate (2OG) and Fe(II)-dependent oxygenase superfamily protein 2-oxoglutarate (2OG) and Fe(II)-dependent oxygenase superfamily protein 2-oxoglutarate (2OG) and Fe(II)-dependent oxygenase superfamily protein
Wa8730a015g004500	1.34985	1.33785e-32	1.86522e-28	0.475	0.229	AT1G60010 AT1G10530
Wa8730a003g006530	1.33565	3.85724e-49	5.37777e-45	0.743	0.515	AT2G21970	SEP2	stress enhanced protein 2 (SEP2) chlorophyll a/b-binding protein
Wa8730a016g001110	1.33309	2.15559e-48	3.00533e-44	0.639	0.303	AT1G36160	ACC1, AT-ACC1, EMB22, GK, GSD1, PAS3, SFR3	Encodes acetyl-CoA carboxylase. Mutant displays uncoordinated cell divisions which are enhanced by cytokinins. Mutant also has aberrant organization of the apical region in the embryo and abnormal root and shoot development. Essential for very long chain fatty acid elongation.
Wa8730a003g005260	1.32863	2.9647e-83	4.13339e-79	0.801	0.286	AT1G68530 AT1G25450 AT2G26640 AT4G34510 AT5G43760 AT1G19440	CER6, CUT1, G2, KCS6, POP1 CER60, KCS5 KCS11 KCS17 KCS20 KCS4	Encodes KCS6, a member of the 3-ketoacyl-CoA synthase family involved in the biosynthesis of VLCFA (very long chain fatty acids). Encodes KCS5, a member of the 3-ketoacyl-CoA synthase family involved in the biosynthesis of VLCFA (very long chain fatty acids). Encodes KCS11, a member of the 3-ketoacyl-CoA synthase family involved in the biosynthesis of VLCFA (very long chain fatty acids). Encodes …
Wa8730a007g000880	1.3244	7.75899e-43	1.08176e-38	0.656	0.335	AT3G53190 AT3G01270 AT3G27400 AT4G24780 AT1G67750 AT5G04310 AT5G63180 AT3G24670 AT5G48900 AT4G13710 AT1G04680		Pectin lyase-like superfamily protein Pectate lyase family protein Encodes a pectate lyase involved in response to nematodes. Encodes a pectate lyase involved in response to nematodes. Pectate lyase family protein Pectin lyase-like superfamily protein Pectin lyase-like superfamily protein Pectin lyase-like superfamily protein Pectin lyase-like superfamily protein Pectin lyase-like superfamily pro…
Wa8730a011g005590	1.31753	1.77123e-43	2.46944e-39	0.702	0.41	AT5G57800	CER3, FLP1, WAX2, YRE	encodes a transmembrane protein with similarity to the sterol desaturase family at the N-terminus and to the short-chain dehydrogenase/reductase family at the C-terminus. Mutant analyses indicate this protein is involved in cuticle membrane and wax biosynthesis.
Wa8730a004g004930	1.30462	5.6009e-32	7.80877e-28	0.336	0.119	AT2G20835
Wa8730a017g002730	1.29376	3.82436e-61	5.33192e-57	0.869	0.697	AT1G75600 AT1G13370		Histone superfamily protein Histone superfamily protein
Wa8730a009g000590	1.27705	8.0528e-35	1.12272e-30	0.609	0.376	AT2G38050 AT3G55360	ATDET2, DET2, DWF6 ATTSC13, CER10, ECR, TSC13	Similar to mammalian steroid-5-alpha-reductase. Involved in the brassinolide biosynthetic pathway. Enoyl-CoA reductase is involved in all very long chain fatty acids (VLCFA) elongation reactions that are required for cuticular wax, storage lipid and sphingolipid metabolism. The protein is located in the ER, but in contrast to its yeast homolog TSC13 is not particularly enriched in the nuclear env…
Wa8730a016g000410	1.27392	9.7334e-26	1.35703e-21	0.281	0.099
Wa8730a013g004710	1.27306	2.90903e-36	4.05577e-32	0.568	0.305	AT5G43360 AT2G32830 AT3G54700	ATPT4, PHT1 3, PHT3 PHT1 5, PHT5 PHT1 7	Encodes Pht1 3, a member of the Pht1 family of phosphate transporters which include: Pht1 1/At5g43350, Pht1 2/At5g43370, Pht1 3/At5g43360, Pht1 4/At2g38940, Pht1 5/At2g32830, Pht1 6/At5g43340, Pht1 7/At3g54700, Pht1 8/At1g20860, Pht1 9/At1g76430 (Plant Journal 2002, 31:341). Encodes Pht1 5, a member of the Pht1 family of phosphate transporters which include: Pht1 1/At5g43350, Pht1 2/At5g43370, Ph…
Wa8730a020g001730	1.27069	2.58266e-42	3.60074e-38	0.757	0.54	AT2G31560 AT2G43340		Protein of unknown function (DUF1685) Protein of unknown function (DUF1685)
Wa8730a010g004870	1.25622	2.90076e-32	4.04424e-28	0.407	0.168	AT5G48230	AACT2, ACAT2, EMB1276	Encodes an acetoacetyl-CoA thiolase that generates the bulk of the acetoacetyl-CoA precursor needed for the cytosolic localized, mevalonate-derived isoprenoids biosynthetic pathway. Loss-of-function mutants are embryo lethal.
Wa8730a001g011890	1.25466	2.04135e-55	2.84606e-51	0.787	0.436	AT5G59530 AT2G44800 AT5G43450		2-oxoglutarate (2OG) and Fe(II)-dependent oxygenase superfamily protein 2-oxoglutarate (2OG) and Fe(II)-dependent oxygenase superfamily protein encodes a protein whose sequence is similar to ACC oxidase
Wa8730a012g000420	1.25276	5.10462e-27	7.11687e-23	0.342	0.141	AT2G36090		F-box family protein
Wa8730a019g003490	1.25206	4.82125e-25	6.72178e-21	0.369	0.174	AT4G01900	GLB1, PII	encodes a PII protein that may function as part of a signal transduction network involved in perceiving the status of carbon and organic nitrogen. Forms a protein complex with N-acetylglutamate kinase and regulates the kinase activity by relieving the feedback inhibition of the kinase by arginine. Regulates acetyl-CoA carboxylase activity.
Wa8730a020g003070	1.24665	2.86334e-27	3.99207e-23	0.467	0.235	AT3G26690 AT1G12880	ATNUDT13, ATNUDX13, NUDX13 NUDT12, atnudt12	Encodes AtNUDT13, a mitochondrial Nudix hydrolase specific for long-chain diadenosine polyphosphates. nudix hydrolase homolog 12
Wa8730a011g004850	1.24512	1.76155e-29	2.45596e-25	0.352	0.136
Wa8730a002g009950	1.23993	4.02779e-38	5.61555e-34	0.415	0.148	AT2G28630 AT5G04530	KCS12 KCS19	Encodes KCS12, a member of the 3-ketoacyl-CoA synthase family involved in the biosynthesis of VLCFA (very long chain fatty acids). Encodes KCS19, a member of the 3-ketoacyl-CoA synthase family involved in the biosynthesis of VLCFA (very long chain fatty acids).
Wa8730a003g003050	1.2117	4.41302e-23	6.15264e-19	0.467	0.284	AT5G39220 AT1G13820		alpha/beta-Hydrolases superfamily protein alpha/beta-Hydrolases superfamily protein
Wa8730a009g001590	1.20936	2.57855e-46	3.59502e-42	0.836	0.585	AT3G55500 AT5G05290 AT5G39280 AT2G37640 AT2G28950 AT2G40610 AT5G02260	ATEXP16, ATEXPA16, ATHEXP, EXP16, EXPA16 ATEXP2, ATEXPA2, ATHEXP, EXP2, EXPA2 ATEXP23, ATEXPA23, ATHEXP, EXPA23 ATEXP3, ATEXPA3, ATHEXP, EXP3 ATEXP6, ATEXPA6, ATHEXP, EXPA6 ATEXP8, ATEXPA8, ATHEXP, EXP8, EXPA8 ATEXP9, ATEXPA9, ATHEXP, EXP9, EXPA9	expansin-like protein. Naming convention from the Expansin Working Group (Kende et al, 2004. Plant Mol Bio). Involved in the formation of nematode-induced syncytia in roots of Arabidopsis thaliana. Encodes an expansin. Naming convention from the Expansin Working Group (Kende et al, 2004. Plant Mol Bio) member of Alpha-Expansin Gene Family. Naming convention from the Expansin Working Group (Kende …
Wa8730a016g001400	1.20285	6.44955e-29	8.99196e-25	0.423	0.193
Wa8730a005g003460	1.20142	4.32221e-35	6.02603e-31	0.317	0.093	AT5G25610	ATRD22, RD22	responsive to dehydration 22 (RD22) mediated by ABA
Wa8730a012g001190	1.19992	1.34581e-25	1.87632e-21	0.432	0.194	AT3G12203 AT1G33540 AT5G09640 AT3G52000	scpl17 scpl18 SCPL19, SNG2 scpl36	serine carboxypeptidase-like 17 serine carboxypeptidase-like 18 encodes a serine carboxypeptidase-like (SCPL) protein. Mutants accumulate sinapoylglucose instead of sinapoylcholine, and have increased levels of choline and decreased activity of the enzyme sinapoylglucose:choline sinapoyltransferase. serine carboxypeptidase-like 36
Wa8730a006g002290	1.19164	8.90409e-23	1.24141e-18	0.454	0.263	AT5G53560 AT5G48810	ATB5-A, ATCB5-E, B5, CB5-E ATB5-B, ATCB5-D, B5, CB5-D, CYTB5-B	Encodes a cytochrome b5 isoform that can be reduced by AtCBR, a cytochrome b5 reductase. Encodes a cytochrome b5 isoform that localizes to the ER. The C-terminal portion of the protein appears to be capable of inserting into a plant microsomal membrane in vitro and the protein appears to be subject to glycosylation.
Wa8730a002g007630	1.19142	9.50381e-42	1.32502e-37	0.71	0.46	AT5G38630	ACYB-1, CYB-1	Encodes for cytochrome b561.
Wa8730a007g008940	1.18056	3.65196e-35	5.09157e-31	0.525	0.258
Wa8730a004g004080	1.1786	3.48525e-42	4.85913e-38	0.497	0.193	AT1G16500 AT1G79160
Wa8730a008g002540	1.17266	1.11265e-27	1.55125e-23	0.385	0.172	AT5G10480	PAS2, PEP	Protein tyrosine phosphatase-like involved in cell division and differentiation. Interacts with CDKA 1 only in its phosphorylated form, preventing dephosphorylation. Overexpression slowed down cell division in suspension cell cultures at the G2-to-M transition and early mitosis and inhibited Arabidopsis seedling growth. Localized in the cytoplasm of dividing cells but moved into the nucleus upon …
Wa8730a020g002780	1.17109	6.29201e-37	8.77233e-33	0.396	0.141	AT1G67730 AT1G24470	ATKCR1, KCR1, YBR159 ATKCR2, KCR2	Encodes one of the two Arabidopsis homologues to YBR159w encoding a S. cerevisiae beta-ketoacyl reductase (KCR), which catalyzes the first reduction during VLCFA (very long chain fatty acids, >18 carbon) elongation: KCR1 (At1g67730), KCR2 (At1g24470). Complementation of the yeast ybr159Delta mutant demonstrated that the two KCR proteins are divergent and that only AtKCR1 can restore heterologous …
Wa8730a010g004190	1.17008	6.53854e-18	9.11603e-14	0.227	0.084	AT1G67980 AT4G26220	CCOAMT CCoAOMT7	Encodes S-adenosyl-L-methionine: transcaffeoyl Coenzyme A 3-O-methyltransferase. Encodes a caffeoyl-coenzyme A O-methyltransferase (CCoAOMT)-like protein with a strong preference for methylating the para position of flavanones and dihydroflavonols, whereas flavones and flavonols are methylated in the meta-position.
Wa8730a009g001620	1.16556	5.91363e-18	8.24479e-14	0.26	0.102	AT5G05270	AtCHIL, CHIL	Chalcone-flavanone isomerase family protein
Wa8730a006g004320	1.15776	7.69303e-31	1.07256e-26	0.59	0.364	AT2G41480 AT5G64120 AT1G14540 AT5G66390 AT2G34060 AT5G15180 AT5G39580 AT3G03670 AT1G49570	AtPRX25, PRX25 AtPRX71, PRX71 PER4 PRX72	Encodes a cationic cell-wall-bound peroxidase homolog that is involved in the lignification of cell walls. encodes a cell wall bound peroxidase that is induced by hypo-osmolarity Peroxidase superfamily protein Encodes a peroxidase that is involved in lignin biosynthesis. Peroxidase superfamily protein Peroxidase superfamily protein Peroxidase superfamily protein Peroxidase superfamily protein Per…
Wa8730a004g007740	1.15092	6.42627e-36	8.9595e-32	0.574	0.285	AT1G03870	FLA9	fasciclin-like arabinogalactan-protein 9 (Fla9)
Wa8730a019g001460	1.14922	1.39158e-54	1.94014e-50	0.899	0.641	AT2G30490 AT2G40890	ATC4H, C4H, CYP73A5, REF3 CYP98A3	Encodes a cinnamate-4-hydroxylase. Mutations in this gene impact phenylpropanoid metabolism, growth and development. encodes coumarate 3-hydroxylase (C3H), a P450-dependent monooxygenase. Involved in lignin biosynthesis and flavonoid biosynthesis. Also affects the biosynthesis of coumarins such as scopoletin and scopolin as a branching-out-pathway from the phenylpropanoid acid level.
Wa8730a008g004080	1.13812	4.89493e-23	6.82451e-19	0.467	0.271	AT1G11840	ATGLX1, GLX1	Encodes a glyoxalase I homolog ATGLX1.
Wa8730a009g002590	1.12499	1.30858e-22	1.82442e-18	0.538	0.357	AT3G16770 AT2G47520 AT3G23220 AT1G53910	ATEBP, EBP, ERF72, RAP2.3 AtERF71, ERF71, HRE2 ESE1 RAP2.12	Encodes a member of the ERF (ethylene response factor) subfamily B-2 of the plant specific ERF/AP2 transcription factor family (RAP2.3). The protein contains one AP2 domain. There are 5 members in this subfamily including RAP2.2 AND RAP2.12.It is localized to the nucleus and acts as a transcriptional activator through the GCC-box. It has been identified as a suppressor of Bax-induced cell death b…
Wa8730a019g003750	1.12004	3.79624e-20	5.29272e-16	0.366	0.191	AT5G02400 AT3G09400 AT2G46920 AT3G17090	PLL2 PLL3 POL	Encodes a protein with similarity to the POL locus which is a novel protein phosphatase 2C. Ubiquitously expressed. No phenotype observed in homozygous null mutant background. Similar to POLTERGEIST (POL) protein phosphatase 2C. No phenotype observed in plants homozygous for a null allele. Ubiquitously expressed. Pol mutations are recessive, partial suppressors of meristem defects in strong clv1 …
Wa8730a007g002730	1.11917	3.88054e-29	5.41025e-25	0.604	0.38
Wa8730a005g003150	1.11886	1.01359e-24	1.41315e-20	0.366	0.167	AT4G35950 AT4G28950	ARAC6, ATRAC6, ATROP5, RAC2, RAC6, ROP5 ARAC7, ATRAC7, ATROP9, RAC7, ROP9	A member of ROP GTPases gene family-like. GTP binding protein Arac6. A member of ROP GTPase gene family.
Wa8730a009g001630	1.11825	1.16198e-24	1.62003e-20	0.516	0.313	AT3G21090 AT2G29940 AT5G13580	ABCG15 ABCG31, ATPDR3, PDR3 ABCG6	ABC-2 type transporter family protein pleiotropic drug resistance 3 Belongs to a clade of five Arabidopsis thaliana ABCG half-transporters that are required for synthesis of an effective suberin barrier in roots and seed coats (ABCG2, ABCG6, and ABCG20) and for synthesis of an intact pollen wall (ABCG1 and ABCG16).
Wa8730a007g005460	1.11455	4.09874e-54	5.71446e-50	0.858	0.484
Wa8730a017g002740	1.10696	5.85775e-26	8.16687e-22	0.481	0.25	AT2G16530 AT1G72590		Encodes polyprenol reductase involved in N-gylcosylation. Mutants are defective in pollen development. Knockouts are embryo lethal Encodes a polyphenol reductase.
Wa8730a009g001850	1.10555	4.24641e-28	5.92034e-24	0.617	0.4	AT5G62920 AT1G19050 AT2G41310 AT3G57040	ARR6 ARR7 ARR8, ATRR3, RR3 ARR9, ATRR4	Encodes a Type-A response regulator that is responsive to cytokinin treatment. Its C-ter domain is very short in comparison to other Arabidopsis ARRs (17 total). Arr6 protein is stabilized by cytokinin. Encodes a member of the Arabidopsis response regulator (ARR) family, most closely related to ARR15. A two-component response regulator protein containing a phosphate accepting domain in the receiv…
Wa8730a016g000330	1.10011	2.9211e-15	4.07259e-11	0.489	0.35	AT3G47710 AT1G26945	BHLH161, BNQ3 KDR, PRE6	BNQ3 belongs to a family of atypical non-DNA binding basic helix-loop-helix (bHLH) proteins that heterodimerize with and negatively regulate bHLH transcription factors. Directly and negatively regulated by AP3 and PI in petals. Required for appropriate regulation of flowering time.May also have a role in regulating light responses. Encodes a basic helix-loop-helix (bHLH) protein involved in blue/…
Wa8730a001g004310	1.09156	2.93573e-19	4.093e-15	0.5	0.332	AT5G04950 AT5G56080 AT1G09240 AT1G56430	ATNAS1, NAS1 ATNAS2, NAS2 ATNAS3, NAS3 ATNAS4, NAS4	Encodes a nicotianamide synthase. Encodes a protein with nicotianamine synthase activity. Its transcript levels rise in roots in response to zinc deficiency and rise in leaves in response to elevated levels of zinc. Encodes a nicotianamine synthase. Encodes a protein with nicotianamine synthase activity.
Wa8730a001g006300	1.08449	1.21465e-18	1.69347e-14	0.383	0.212	AT5G01700		Protein phosphatase 2C family protein
Wa8730a003g002320	1.07527	1.68955e-18	2.35557e-14	0.445	0.284	AT4G37470	KAI2	HTL belonging to the alpha/beta fold hydrolase superfamily. Mutant and over-expression studies indicates its involvement in seedling de-etiolation process.
Wa8730a012g005240	1.07111	2.11592e-22	2.95002e-18	0.309	0.125	AT3G28910 AT1G74650 AT4G12350 AT1G08810 AT3G47600	ATMYB30, MYB30 ATMYB31, ATY13, MYB31 AtMYB42, MYB42 AtMYB60, MYB60 ATMYB94, ATMYBCP70, MYB94	transcription factor myb homologue Member of the R2R3 factor gene family. Encodes a putative transcription factor (MYB42). putative transcription factor of the R2R3-MYB gene family. Transcript increases under conditions that promote stomatal opening (white and blue light, abi1-1 mutation) and decreases under conditions that trigger stomatal closure (ABA, desiccation, darkness), with the exception…
Wa8730a013g003830	1.06947	7.14981e-32	9.96826e-28	0.552	0.287
Wa8730a008g000260	1.0655	4.64397e-15	6.47462e-11	0.262	0.118	AT3G63240		DNAse I-like superfamily protein
Wa8730a001g003580	1.06244	1.17872e-31	1.64337e-27	0.626	0.348	AT3G62700 AT2G47800 AT1G71330	ABCC14, ATMRP10, MRP10 ABCC4, ATMRP4, EST3, MRP4 ATNAP5, NAP5	member of MRP subfamily Encodes a plasma membrane localized ATPase transporter involved in multidrug transport. The expression of this gene is upregulated by herbicide safeners such as benoxacor, fluxofenim and fenclorim. member of NAP subfamily
Wa8730a013g002080	1.06117	4.82768e-17	6.73076e-13	0.317	0.161	AT4G11820	FKP1, HMGS, MVA1	Encodes a protein with hydroxymethylglutaryl-CoA synthase activity which was characterized by phenotypical complementation of the S. cerevisiae mutant.
Wa8730a007g007620	1.05643	7.21064e-18	1.00531e-13	0.317	0.142
Wa8730a008g003940	1.05342	3.59531e-27	5.01258e-23	0.937	0.864
Wa8730a007g008930	1.04121	9.29723e-18	1.29622e-13	0.598	0.477	AT2G27820 AT3G44720 AT5G22630 AT1G08250	ADT3, PD1 ADT4 ADT5 ADT6, AtADT6	Encodes a plastid-localized arogenate dehydratase involved in phenylalanine biosynthesis. Not less than six genes encoding ADT were identi&#64257 ed in the Arabidopsis genome: ADT1 [At1g11790] ADT2 [At3g07630] ADT3 [At2g27820] ADT4 [At3g44720] ADT5 [At5g22630] and ADT6 [At1g08250]. Encodes a plastid-localized arogenate dehydratase involved in phenylalanine biosynthesis. Not less than six genes en…
Wa8730a002g007490	1.04001	6.11685e-12	8.52811e-08	0.399	0.281	AT2G38040	CAC3	encodes the carboxyltransferase alpha subunit of acetyl-CoA carboxylase, involved in de novo fatty acid biosynthesis
Wa8730a012g002940	1.01544	2.77161e-12	3.86418e-08	0.374	0.253
Wa8730a005g004400	1.01443	7.76695e-20	1.08287e-15	0.24	0.09	AT5G41810
Wa8730a015g001450	1.00927	1.73377e-22	2.41723e-18	0.656	0.538	AT3G21150 AT2G24790 AT5G24930 AT5G57660	AtBBX32, BBX32, EIP6 ATCOL3, BBX4, COL3 ATCOL4, BBX5, COL4 ATCOL5, BBX6, COL5	Encodes a protein with a B-box domain predicted to act as a transcription factor. Expression of the BBX32 gene is affected by monochromatic red light. Positive regulator of photomorphogenesis that acts downstream of COP1 but can promote lateral root development independently of COP1 and also function as a daylength-sensitive regulator of shoot branching. CONSTANS-like 4 CONSTANS-like 5
Wa8730a002g003100	1.00405	3.03284e-16	4.22838e-12	0.32	0.17
Wa8730a011g000300	1.00379	3.7137e-17	5.17764e-13	0.478	0.322

## Sheet: Dawn C2 DEGs
Dataset S8. Differentially Expressed Genes for Dawn Cluster 2
Genes showing significant differential expression (log2FC>1 & p_val_adj <0.05 & PCT1 > 10%) in the given cluster versus all other cells in the dawn dataset
PCT1: Percentage of cells within the cluster expressing the gene
PCT2: Percentage of cells outside the cluster expressing the gene
Gene	Ave. Log2 FC	p Value	p Value Adj.	PCT1	PCT2	Arabidopsis orthologues	Arabidopsis gene names	Arabidopsis gene description
Wa8730a004g002910	3.42215	7.64906e-112	1.06643e-107	0.421	0.046	AT5G42180 AT4G25980 AT4G30170 AT4G17690 AT4G36430 AT5G19880 AT4G11290	PER64	Peroxidase superfamily protein Peroxidase superfamily protein Peroxidase family protein Peroxidase superfamily protein Peroxidase superfamily protein Peroxidase superfamily protein Peroxidase superfamily protein
Wa8730a001g000910	3.15235	2.42704e-87	3.38379e-83	0.499	0.11
Wa8730a015g001560	3.12463	1.89277e-123	2.6389e-119	0.691	0.174	AT5G48540		receptor-like protein kinase-related family protein
Wa8730a019g000680	2.94343	1.82881e-150	2.54972e-146	0.658	0.117	AT5G59820 AT2G37430 AT3G46090 AT2G28710 AT1G02030 AT5G03510 AT3G53600	AtZAT12, RHL41, ZAT12 ZAT11 ZAT7	Encodes a zinc finger protein involved in high light and cold acclimation. Overexpression of this putative transcription factor increases the expression level of 9 cold-responsive genes and represses the expression level of 15 cold-responsive genes, including CBF genes. Also, lines overexpressing this gene exhibits a small but reproducible increase in freeze tolerance. Because of the repression o…
Wa8730a016g003310	2.72268	5.46101e-102	7.61374e-98	0.501	0.088	AT3G14310 AT4G33220 AT1G11580 AT4G02330 AT1G23200 AT5G20860 AT3G60730 AT1G02810 AT4G15980	ATPME3, OZS2, PME3 ATPME44, PME44 ATPMEPCRA, PMEPCRA ATPMEPCRB, AtPME41, PME41	encodes a pectin methylesterase, targeted by a cellulose binding protein (CBP) from the parasitic nematode Heterodera schachtii during parasitism. pectin methylesterase 44 methylesterase PCR A Encodes a pectin methylesterase that is sensitive to chilling stress and brassinosteroid regulation. Encodes a pectin methyl esterase involved in embryo development. Plant invertase/pectin methylesterase in…
Wa8730a015g001570	2.64609	7.90691e-89	1.10238e-84	0.614	0.181	AT5G48540		receptor-like protein kinase-related family protein
Wa8730a014g001820	2.60759	3.99438e-122	5.56897e-118	0.708	0.193	AT1G74800 AT1G27120		Encodes a Golgi-localized hydroxyproline galactosyltransferase GALT5. Functions together with GALT2 as redundant GALTs that control AGP (arabinogalactan-proteins) O-glycosylation, which is essential for normal growth and development. Mutants display multiple phenotypes including reduced root hair growth. Encodes a Golgi-localized hydroxyproline-O-galactosyltransferase.
Wa8730a010g006490	2.54071	1.84289e-116	2.56935e-112	0.89	0.445	AT4G28050 AT2G23810 AT4G30430	TET7 TET8 TET9	Member of TETRASPANIN family Member of TETRASPANIN family Member of TETRASPANIN family
Wa8730a002g003450	2.51441	8.18481e-106	1.14113e-101	0.623	0.156	AT2G35710 AT4G16600	PGSIP7 PGSIP8	Nucleotide-diphospho-sugar transferases superfamily protein Nucleotide-diphospho-sugar transferases superfamily protein
Wa8730a007g007160	2.49333	1.15313e-71	1.6077e-67	0.424	0.093	AT1G35660
Wa8730a012g004810	2.47626	3.09899e-108	4.32062e-104	0.744	0.253	AT5G65110	ACX2, ATACX2	Encodes an acyl-CoA oxidase presumably involved in long chain fatty acid biosynthesis.
Wa8730a002g004460	2.45771	7.10789e-132	9.90982e-128	0.876	0.335	AT4G38580 AT1G71050 AT4G35060 AT5G66110	ATFP6, FP6, HIPP26 HIPP20 HIPP25 HIPP27	putative farnesylated protein (At4g38580) mRNA, complete Heavy metal transport/detoxification superfamily protein Heavy metal transport/detoxification superfamily protein Heavy metal transport/detoxification superfamily protein
Wa8730a015g005970	2.45592	2.74659e-89	3.8293e-85	0.614	0.192
Wa8730a013g001140	2.44746	2.86586e-81	3.99559e-77	0.793	0.444	AT5G47120 AT4G17580	ATBI-1, ATBI1, BI-1, BI1	Encodes BI-1, a homolog of mammalian Bax inhibitor 1. Functions as an attenuator of biotic and abiotic types of cell death. Bax-induced cell death can be downregulated by ectopically expressing AtBI in planta. Bax inhibitor-1 family protein
Wa8730a019g002370	2.43262	6.05935e-39	8.44794e-35	0.584	0.33	AT4G15610 AT3G06390		Uncharacterised protein family (UPF0497) Uncharacterised protein family (UPF0497)
Wa8730a005g003350	2.41076	3.36749e-124	4.69495e-120	0.625	0.124	AT1G52245 AT3G16120	NA	NA Dynein light chain type 1 family protein
Wa8730a002g001220	2.40256	7.43991e-86	1.03727e-81	0.612	0.185	AT5G52640 AT4G24190 AT5G56030	ATHS83, ATHSP90.1, AtHsp90-1, HSP81-1, HSP81.1, HSP83, HSP90.1 AtHsp90-7, AtHsp90.7, HSP90.7, SHD AtHsp90.2, ERD8, HSP81-2, HSP81.2, HSP90.2	Encodes a cytosolic heat shock protein AtHSP90.1. AtHSP90.1 interacts with disease resistance signaling components SGT1b and RAR1 and is required for RPS2-mediated resistance. encodes an ortholog of GRP94, an ER-resident HSP90-like protein and is involved in regulation of meristem size and organization. Single and double mutant analyses suggest that SHD may be required for the correct folding and…
Wa8730a010g005650	2.39971	4.82939e-104	6.73314e-100	0.755	0.284	AT3G19940		Encodes a hexose-H(+) symporter that catalyzes the high-affinity uptake of glucose, galactose and mannose that is induced under low-glucose conditions in pollen tubes.
Wa8730a020g000110	2.39759	2.22722e-118	3.10519e-114	0.501	0.071	AT1G71960 AT2G36380 AT1G66950	ABCG25, ATABCG25 ABCG34, ATPDR6, PDR6 ABCG39, ATPDR11, PDR11	Encodes a plasma membrane localized ABC transporter involved in abscisic acid transport and responses. pleiotropic drug resistance 6 Encodes a plasma membrane-localized ABC transporter. Confers tolerance to herbicide paraquat.
Wa8730a011g005230	2.34766	8.93142e-98	1.24522e-93	0.667	0.196	AT4G31800 AT1G80840 AT2G25000	ATWRKY18, WRKY18 ATWRKY40, WRKY40 ATWRKY60, WRKY60	Pathogen-induced transcription factor. Binds W-box sequences in vitro. Forms protein complexes with itself and with WRKY40 and WRKY60. Constitutive expression of WRKY18 enhanced resistance to P. syringae, but its coexpression with WRKY40 or WRKY60 made plants more susceptible to both P. syringae and B. cinerea. WRKY18, WRKY40, and WRKY60 have partially redundant roles in response to the hemibiotr…
Wa8730a008g005470	2.33561	1.78363e-78	2.48674e-74	0.893	0.571	AT5G54500 AT4G36750 AT4G27270	FQR1	Encodes a flavin mononucleotide-binding flavodoxin-like quinone reductase that is a primary auxin-response gene. Quinone reductase family protein Quinone reductase family protein
Wa8730a010g001420	2.32219	2.20286e-90	3.07123e-86	0.614	0.172
Wa8730a009g002950	2.2771	4.52117e-64	6.30342e-60	0.311	0.048	AT2G38870		Predicted to encode a PR (pathogenesis-related) peptide that belongs to the PR-6 proteinase inhibitor family. Six putative PR-6-type protein encoding genes are found in Arabidopsis: At2g38900, At2g38870, At5g43570, At5g43580, At3g50020 and At3g46860.
Wa8730a001g010360	2.27397	4.53865e-97	6.32778e-93	0.482	0.085
Wa8730a005g005110	2.24886	2.7041e-114	3.77006e-110	0.444	0.051	AT5G42830		HXXXD-type acyl-transferase family protein
Wa8730a007g000980	2.2166	2.96916e-71	4.13961e-67	0.603	0.213	AT3G01770 AT5G14270 AT3G27260 AT5G63320	ATBET10, BET10 ATBET9, BET9 GTE8 NPX1	bromodomain and extraterminal domain protein 10 bromodomain and extraterminal domain protein 9 Kinase like protein with similarity to yeast BDF1 and human RING3 protein, which have two bromodomains GTE8 has a single bromodomain Encodes NPX1 (Nuclear Protein X1), a nuclear factor regulating abscisic acid responses.
Wa8730a015g004680	2.19803	1.09936e-88	1.53272e-84	0.634	0.197	AT3G28340 AT1G13250 AT1G24170 AT1G70090	GATL10, GolS8 GATL3 GATL8, LGT9 GATL9, LGT8	Encodes a protein with putative galacturonosyltransferase activity. Encodes a protein with putative galacturonosyltransferase activity. Encodes a protein with putative galacturonosyltransferase activity. Encodes a protein with putative galacturonosyltransferase activity.
Wa8730a011g004200	2.17737	8.99967e-72	1.25473e-67	0.449	0.101
Wa8730a007g004510	2.13406	4.3157e-63	6.01694e-59	0.675	0.331	AT1G28200 AT5G13200	FIP1	VirF-interacting protein FIP1 Encodes a protein with unknown function that is involved in hormone mediated regulation of seed germination/dormancy.
Wa8730a019g000760	2.13264	2.04481e-102	2.85087e-98	0.529	0.102	AT5G03540 AT3G55150 AT2G39380 AT3G09520 AT1G07725 AT5G59730 AT2G28650	ATEXO70A1, EXO70A1 ATEXO70H1, EXO70H1 ATEXO70H2, EXO70H2 ATEXO70H4, EXO70H4 ATEXO70H6, EXO70H6 ATEXO70H7, EXO70H7 ATEXO70H8, EXO70H8	AtEXO70A1 is a member of EXO70 gene family, putative exocyst subunits, conserved in land plants. Arabidopsis thaliana contains 23 putative EXO70 genes, which can be classified into nine clusters on the phylogenetic tree A member of EXO70 gene family, putative exocyst subunits, conserved in land plants. Arabidopsis thaliana contains 23 putative EXO70 genes, which can be classified into eight clust…
Wa8730a001g006690	2.13035	2.90766e-107	4.05386e-103	0.749	0.239	AT2G40180 AT2G30020 AT1G07160	ATHPP2C5, PP2C5	Encodes PP2C5, a member of the PP2C family phosphatases. PP2C5 acts as a MAPK phosphatase that positively regulates seed germination, stomatal closure and ABA-inducible gene expression. Encodes AP2C1. Belongs to the clade B of the PP2C-superfamily. Acts as a MAPK phosphatase that negatively regulates MPK4 and MPK6. Protein phosphatase 2C family protein
Wa8730a014g005470	2.12763	2.57853e-83	3.59499e-79	0.523	0.126	AT5G66050		Wound-responsive family protein
Wa8730a014g001210	2.12104	1.81259e-78	2.52712e-74	0.54	0.152	AT2G03450 AT1G13900	ATPAP9, PAP9 PAP2	purple acid phosphatase 9 Encodes a dual-localized acid phosphatase (mitochondria and chloroplast) that modulates carbon metabolism.
Wa8730a003g001330	2.10293	9.11377e-94	1.27064e-89	0.612	0.157	AT4G37850 AT2G22750		basic helix-loop-helix (bHLH) DNA-binding superfamily protein basic helix-loop-helix (bHLH) DNA-binding superfamily protein
Wa8730a013g001840	2.08987	5.22957e-80	7.29107e-76	0.512	0.13	AT2G46620		P-loop containing nucleoside triphosphate hydrolases superfamily protein
Wa8730a005g006290	2.07118	1.88979e-67	2.63475e-63	0.306	0.042	AT2G21490	LEA	dehydrin LEA
Wa8730a001g006070	2.06338	4.80387e-78	6.69755e-74	0.645	0.245	AT3G10940	LSF2	Encodes a protein with a predicted dual-specificity phosphatase domain, similar to the glucan phosphorylases SEX4 and LSF1, however, it lacks the carbohydrate binding domain present in those proteins. Has phosphoglucan phosphatase activity. It binds to starch and specifically hydrolyzes phosphate from the C3-position.
Wa8730a001g003830	2.05037	4.6312e-82	6.45682e-78	0.54	0.141	AT3G16720 AT2G47560 AT4G15975	ATL2, TL2	RING-H2 protein induced after exposure to chitin or inactivated crude cellulase preparations. RING/U-box superfamily protein RING/U-box superfamily protein
Wa8730a008g005080	2.03169	2.11196e-48	2.9445e-44	0.289	0.058	AT4G21215
Wa8730a010g004450	2.00818	5.44523e-71	7.59173e-67	0.427	0.09
Wa8730a005g003750	2.00393	3.94203e-41	5.49598e-37	0.438	0.167	AT3G25780	AOC3	Encodes allene oxide cyclase, one of the enzymes involved in jasmonic acid biosynthesis. One of four genes in Arabidopsis that encode this enzyme. mRNA expression is upregulated in senescing leaves. Note: Nomenclature for Arabidopsis allene oxide cyclase 3 (AOC3, AT3G25780) gene is based on Stenzel et al. 2003 Plant Molecular Biology 51:895-911. AOC3 (AT3G25780) is also referred to as AOC2 in He …
Wa8730a016g001520	1.9973	4.67168e-59	6.51326e-55	0.625	0.278	AT1G35140 AT5G64260 AT5G09440 AT4G08950	EXL1, PHI-1 EXL2 EXL4 EXO	At1g35140 (At1g35140/T32G9_32) mRNA, complete cds EXORDIUM like 2 EXORDIUM like 4 Phosphate-responsive 1 family protein
Wa8730a003g004240	1.96641	3.3882e-82	4.72383e-78	0.573	0.155	AT2G41870 AT3G57540		Remorin family protein Remorin family protein
Wa8730a005g006600	1.93877	7.70751e-35	1.07458e-30	0.656	0.462	AT3G03270 AT5G14680 AT3G58450		HRU1 is a hypoxia induced universal stress protein. It exists as two splice variants with AT3G03270.2 , which contains a putative dimerization domain, the predominant transcript found under anoxia. It is induced by RAP2.12. Subcellular localization is dynamic under anoxia the localization of HRU1 shifts from cytoplasm to the plasma membrane. Adenine nucleotide alpha hydrolases-like superfamily pr…
Wa8730a003g000840	1.93849	1.09158e-57	1.52188e-53	0.452	0.135	AT5G66650 AT4G36820 AT2G23790 AT5G42610		Protein of unknown function (DUF607) Protein of unknown function (DUF607) Protein of unknown function (DUF607) Protein of unknown function (DUF607)
Wa8730a001g007370	1.93371	3.31491e-77	4.62165e-73	0.653	0.235	AT4G31550 AT2G24570	ATWRKY11, WRKY11 ATWRKY17, WRKY17	member of WRKY Transcription Factor Group II-d negative regulator of basal resistance to Pseudomonas syringae. member of WRKY Transcription Factor Group II-d negative regulator of basal resistance to Pseudomonas syringae.
Wa8730a012g001430	1.92943	9.29023e-37	1.29524e-32	0.259	0.061	AT5G63450 AT3G48520 AT1G34540 AT5G08250	CYP94B1 CYP94B3 CYP94D1	member of CYP94B member of CYP94B member of CYP94D Cytochrome P450 superfamily protein
Wa8730a016g001550	1.89249	5.77629e-60	8.0533e-56	0.631	0.28	AT1G35140 AT5G64260 AT5G09440 AT4G08950	EXL1, PHI-1 EXL2 EXL4 EXO	At1g35140 (At1g35140/T32G9_32) mRNA, complete cds EXORDIUM like 2 EXORDIUM like 4 Phosphate-responsive 1 family protein
Wa8730a012g004170	1.87334	1.25116e-63	1.74437e-59	0.463	0.132	AT1G78720 AT2G34250 AT1G29310		SecY protein transport family protein SecY protein transport family protein SecY protein transport family protein
Wa8730a007g006300	1.86287	4.81609e-82	6.71459e-78	0.314	0.032	AT2G18193 AT3G50940 AT3G28580		P-loop containing nucleoside triphosphate hydrolases superfamily protein P-loop containing nucleoside triphosphate hydrolases superfamily protein P-loop containing nucleoside triphosphate hydrolases superfamily protein
Wa8730a014g000450	1.85357	9.23356e-58	1.28734e-53	0.576	0.232	AT1G49560 AT4G37180		Homeodomain-like superfamily protein myb family transcription factor, contains Pfam domain, PF00249: Myb-like DNA-binding domain l also isolated as a putative cytoskeletal protein in a yeast screen
Wa8730a008g003990	1.84608	1.57383e-18	2.19423e-14	0.496	0.343	AT2G32240
Wa8730a005g004060	1.84327	5.02106e-52	7.00036e-48	0.38	0.099	AT5G53460	GLT1	NADH-dependent glutamate synthase
Wa8730a018g001940	1.83733	1.51731e-75	2.11543e-71	0.457	0.098	AT2G41010 AT3G56880	ATCAMBP25, CAMBP25	Encodes a novel calmodulin binding protein whose gene expression is induced by dehydration and ionic (salt) and non-ionic (mannitol) osmotic stress. Lines over-expressing this gene are more sensitive and anti-sense lines are more tolerant to osmotic stress, suggesting this gene may be a negative regulator of response to osmotic stress. VQ motif-containing protein
Wa8730a019g000660	1.83705	2.7589e-67	3.84645e-63	0.366	0.067	AT5G59820 AT2G37430 AT2G28710 AT1G02030 AT5G03510 AT3G46070 AT3G53600	AtZAT12, RHL41, ZAT12 ZAT11	Encodes a zinc finger protein involved in high light and cold acclimation. Overexpression of this putative transcription factor increases the expression level of 9 cold-responsive genes and represses the expression level of 15 cold-responsive genes, including CBF genes. Also, lines overexpressing this gene exhibits a small but reproducible increase in freeze tolerance. Because of the repression o…
Wa8730a016g001540	1.82677	3.74906e-41	5.22693e-37	0.493	0.205	AT1G35140 AT5G64260 AT5G09440 AT4G08950	EXL1, PHI-1 EXL2 EXL4 EXO	At1g35140 (At1g35140/T32G9_32) mRNA, complete cds EXORDIUM like 2 EXORDIUM like 4 Phosphate-responsive 1 family protein
Wa8730a007g002940	1.82347	3.59578e-47	5.01324e-43	0.306	0.066	AT4G24960 AT5G50720 AT2G42820	ATHVA22D, HVA22D ATHVA22E, HVA22E HVA22F	Homologous to a eukaryote specific ABA- and stress-inducible gene first isolated from barley. Groups in one subfamily with ATHVA22E. Along with other members of the ATHVA22 family, it may be involved in regulation of autophagy during development. Encodes one of five HVA22 homologs in Arabidopsis. HVA22 is an ABA- and stress-inducible gene first isolated from barley. Members of this gene family ha…
Wa8730a018g000270	1.81776	1.52473e-67	2.12577e-63	0.603	0.206	AT3G11410 AT1G07430 AT5G59220 AT2G29380	AHG3, ATPP2CA, PP2CA AIP1, AtAIP1, HAI2, HON HAI1, SAG113 HAI3	Encodes protein phosphatase 2C. Negative regulator of ABA signalling. Expressed in seeds during germination. mRNA up-regulated by drought and ABA. Encodes a member of the group A protein phosphatase 2C (PP2C) family that is responsible for negatively regulating seed dormancy. Encodes a member of the PP2C family (Clade A protein phosphatases type 2C). Functions as a negative regulator of osmotic s…
Wa8730a015g006070	1.81709	3.07398e-34	4.28575e-30	0.399	0.154
Wa8730a017g003480	1.80426	5.39152e-70	7.51686e-66	0.744	0.35	AT5G03380 AT2G28090 AT2G36950		Heavy metal transport/detoxification superfamily protein Heavy metal transport/detoxification superfamily protein Heavy metal transport/detoxification superfamily protein
Wa8730a019g001830	1.79875	1.2428e-116	1.73271e-112	0.956	0.538	AT1G01720 AT1G52890 AT4G27410	ANAC002, ATAF1 ANAC019, NAC019 ANAC072, RD26	Belongs to a large family of putative transcriptional activators with NAC domain. Transcript level increases in response to wounding and abscisic acid. ATAF1 attentuates ABA signaling and sythesis. Mutants are hyposensitive to ABA. encodes a NAC transcription factor whose expression is induced by drought, high salt, and abscisic acid. This gene binds to ERD1 promoter in vitro. Encodes a NAC trans…
Wa8730a005g008260	1.77364	2.98946e-30	4.16791e-26	0.457	0.23	AT1G70770 AT1G23170		Protein of unknown function DUF2359, transmembrane Protein of unknown function DUF2359, transmembrane
Wa8730a005g004220	1.76208	5.44457e-86	7.59081e-82	0.424	0.069	AT4G01070 AT1G01420 AT5G26310	GT72B1, UGT72B1 UGT72B3 UGT72E3	the glycosyltransferase (UGT72B1) is involved in metabolizing xenobiotica (chloroaniline and chlorophenole). Comparison between wild type and knock-out mutant demonstrates the central role of this gene for metabolizing chloroaniline but significantly less for chlorophenole. The glucosyltransferase preferred UDP-xylose over UDP-glucose indicating its (additional) functioning as a xylosyltransferas…
Wa8730a002g003960	1.74855	8.12714e-54	1.13309e-49	0.259	0.038	AT5G37690 AT5G41890 AT1G75890		SGNH hydrolase-type esterase superfamily protein GDSL-motif esterase/acyltransferase/lipase. Enzyme group with broad substrate specificity that may catalyze acyltransfer or hydrolase reactions with lipid and non-lipid substrates. GDSL-motif esterase/acyltransferase/lipase. Enzyme group with broad substrate specificity that may catalyze acyltransfer or hydrolase reactions with lipid and non-lipid …
Wa8730a015g003250	1.73518	2.9989e-23	4.18107e-19	0.35	0.148	AT3G30842 AT1G15520	ABCG38, ATPDR10, PDR10 ABCG40, ATABCG40, ATPDR12, PDR12	pleiotropic drug resistance 10 ABC transporter family involved in ABA transport and resistance to lead. Localizes to plasma membrane. Upregulated by lead. Expressed in leaves, flowers, stomata and roots.
Wa8730a010g005120	1.7351	3.07458e-54	4.28657e-50	0.642	0.308	AT4G30600		signal recognition particle receptor alpha subunit family protein
Wa8730a001g005110	1.73344	2.02638e-66	2.82518e-62	0.636	0.258	AT2G33480 AT3G15170 AT3G29035 AT5G18270 AT5G39610 AT3G04060 AT3G12977	ANAC041, NAC041 ANAC054, ATNAC1, CUC1 ANAC059, ATNAC3, NAC3, ORS1 ANAC087 ANAC092, ATNAC2, ATNAC6, NAC2, NAC6, ORE1 NAC046, anac046	NAC domain containing protein 41 Encodes a transcription factor involved in shoot apical meristem formation and auxin-mediated lateral root formation. The gene is thought not to be involved in stress responses (NaCl, auxins, ethylene). <i>Cuc</i> mutant was first recognized at the heart stage, where embryos lacking two distinct bulges of cotyledonary primordia were observed. Encodes a protein wit…
Wa8730a002g004680	1.73272	3.4377e-69	4.79284e-65	0.457	0.11	AT5G38280 AT1G75800 AT5G24620 AT1G77700 AT2G17860 AT4G36010 AT4G38670 AT1G20030	PR5K	putative receptor serine/threonine kinase PR5K (PR5K) mRNA, PR5-like receptor kinase Pathogenesis-related thaumatin superfamily protein Pathogenesis-related thaumatin superfamily protein Pathogenesis-related thaumatin superfamily protein Pathogenesis-related thaumatin superfamily protein Pathogenesis-related thaumatin superfamily protein Pathogenesis-related thaumatin superfamily protein Pathogen…
Wa8730a004g008480	1.72993	2.47383e-63	3.44901e-59	0.766	0.385	AT3G24500	ATMBF1C, MBF1C	One of three genes in A. thaliana encoding multiprotein bridging factor 1, a highly conserved transcriptional coactivator. May serve as a bridging factor between a bZIP factor and TBP. Its expression is specifically elevated in response to pathogen infection, salinity, drought, heat, hydrogen peroxide, and application of abscisic acid or salicylic acid. Constitutive expression enhances the tolera…
Wa8730a001g011310	1.70601	5.23712e-59	7.30159e-55	0.521	0.166	AT5G02500 AT3G12580 AT3G09440	AT-HSC70-1, AtHsp70-1, HSC70, HSC70-1, HSP70-1 ATHSP70, HSP70	encodes a member of heat shock protein 70 family. heat shock protein 70 Heat shock protein 70 (Hsp 70) family protein
Wa8730a020g001680	1.69056	1.61315e-56	2.24906e-52	0.314	0.058	AT1G17420 AT1G67560	ATLOX3, LOX3 ATLOX6, LOX6	Lipoxygenase PLAT/LH2 domain-containing lipoxygenase family protein
Wa8730a010g006210	1.67504	4.42644e-54	6.17134e-50	0.43	0.123	AT2G24580		FAD-dependent oxidoreductase family protein
Wa8730a004g007490	1.6641	4.9693e-71	6.9282e-67	0.873	0.556	AT3G24530		AAA-type ATPase family protein / ankyrin repeat family protein
Wa8730a007g006910	1.65988	7.20773e-78	1.0049e-73	0.78	0.382	AT1G01720 AT5G63790 AT5G08790 AT1G77450	ANAC002, ATAF1 ANAC102, NAC102 ATAF2, anac081 NAC032, anac032	Belongs to a large family of putative transcriptional activators with NAC domain. Transcript level increases in response to wounding and abscisic acid. ATAF1 attentuates ABA signaling and sythesis. Mutants are hyposensitive to ABA. Encodes a member of the NAC family of transcription factors. ANAC102 appears to have a role in mediating response to low oxygen stress (hypoxia) in germinating seedlin…
Wa8730a018g001290	1.65645	1.10546e-34	1.54123e-30	0.449	0.18	AT2G40340 AT2G38340 AT5G05410 AT3G11020 AT5G18450	AtERF48, DREB2C DREB19 DREB2, DREB2A DREB2, DREB2B	Encodes a member of the DREB subfamily A-2 of ERF/AP2 transcription factor family. The protein contains one AP2 domain. There are eight members in this subfamily including DREB2A AND DREB2B that are involved in response to drought. encodes a member of the DREB subfamily A-2 of ERF/AP2 transcription factor family. The protein contains one AP2 domain. There are eight members in this subfamily inclu…
Wa8730a010g000800	1.64782	1.91247e-52	2.66637e-48	0.416	0.119	AT4G26080 AT5G57050 AT1G72770 AT1G17550	ABI1, AtABI1 ABI2, AtABI2 AtHAB1, HAB1 AtHAB2, HAB2	Involved in abscisic acid (ABA) signal transduction. Negative regulator of ABA promotion of stomatal closure. Encodes a protein phosphatase 2C and is involved in ABA signal transduction. Binds fibrillin preprotein in vitro and in vivo. mutant has ABA hypersensitive inhibition of seed germination Protein Phosphatase 2C regulates the activation of the Snf1-related kinase OST1 by abscisic acid. Prot…
Wa8730a015g002550	1.63657	2.13577e-38	2.97769e-34	0.388	0.137	AT1G42990	ATBZIP60, BZIP60	AtbZIP60 consists of a bZIP DNA binding domain followed by a putative transmembrane domain. GFP fusions containing the first 260 amino acids (AtbZIP60deltaC) are nuclear-localized. AtbZIP60 is upregulated by the addition of tunicamycin (ER stress response inductor), DTT (inhibitor of disulfide bond formation) and azetin-2-carboxylate (proline analog perturbing protein structure). Upon ER stress t…
Wa8730a003g006290	1.62564	4.61684e-67	6.43679e-63	0.548	0.173	AT1G78230 AT3G17920		Outer arm dynein light chain 1 protein Outer arm dynein light chain 1 protein
Wa8730a017g002000	1.62121	3.89665e-17	5.4327e-13	0.515	0.401	AT4G12030 AT4G22840	BASS5, BAT5	Required for the biosynthesis of methionine-derived glucosinolates. Involved in the transport of 2-keto acids between chloroplasts and the cytosol. Sodium Bile acid symporter family
Wa8730a007g008470	1.61782	1.12118e-28	1.56314e-24	0.372	0.153	AT5G42100 AT2G27500 AT4G34480 AT4G18340 AT2G16230	ATBG_PPAP, BG_PPAP	encodes a plasmodesmal (Pd)-associated membrane protein involved in plasmodesmal callose degradation, i.e. beta-1,3-glucanase (EC 3.2.1.39), and functions in the gating of Pd Glycosyl hydrolase superfamily protein O-Glycosyl hydrolases family 17 protein Glycosyl hydrolase superfamily protein O-Glycosyl hydrolases family 17 protein
Wa8730a002g001010	1.61367	2.04447e-50	2.85041e-46	0.391	0.111	AT1G01570		Protein of unknown function (DUF604)
Wa8730a004g000410	1.60148	2.46437e-65	3.43582e-61	0.694	0.29	AT1G53170 AT3G23240 AT1G04370 AT2G31230	ATERF-8, ATERF8, ERF8 ATERF1, ERF1 ATERF14, ERF14 ATERF15, ERF15	encodes a member of the ERF (ethylene response factor) subfamily B-1 of ERF/AP2 transcription factor family (ATERF-8). The protein contains one AP2 domain. There are 15 members in this subfamily including ATERF-3, ATERF-4, ATERF-7, and leafy petiole. encodes a member of the ERF (ethylene response factor) subfamily B-3 of ERF/AP2 transcription factor family (ERF1). The protein contains one AP2 dom…
Wa8730a010g003440	1.59767	1.75779e-64	2.45071e-60	0.689	0.282	AT3G49940 AT1G67100 AT3G02550 AT1G68510	LBD38 LBD40 LBD41 LBD42	LOB domain-containing protein 38 LOB domain-containing protein 40 LOB domain-containing protein 41 LOB domain-containing protein 42
Wa8730a016g001560	1.5873	1.73782e-37	2.42287e-33	0.565	0.285	AT1G35140 AT5G64260 AT5G09440 AT4G08950	EXL1, PHI-1 EXL2 EXL4 EXO	At1g35140 (At1g35140/T32G9_32) mRNA, complete cds EXORDIUM like 2 EXORDIUM like 4 Phosphate-responsive 1 family protein
Wa8730a014g004040	1.56962	2.13126e-56	2.9714e-52	0.358	0.08	AT5G15730 AT4G00300 AT2G28970 AT5G24010	AtCRLK2, CRLK2	Protein kinase superfamily protein AT4G00300 has been split into two loci based on new cDNA evidence provided by Aleksander Riise Hansen of University of Copenhagen: AT4G00300.2 becomes AT4G00300.1 a new locus AT4G00295 is created. See comments field for AT4G00295 annotation. Leucine-rich repeat protein kinase family protein Protein kinase superfamily protein
Wa8730a012g004920	1.56234	1.17428e-36	1.63718e-32	0.612	0.358	AT4G33500		Protein phosphatase 2C family protein
Wa8730a015g000860	1.5608	9.83728e-69	1.37151e-64	0.697	0.27	AT5G48070 AT2G18800 AT4G30270 AT4G25810 AT5G57550	ATXTH20, XTH20 ATXTH21, XTH21 MERI-5, MERI5B, SEN4, XTH24 XTH23, XTR6 XTH25, XTR3	putative xyloglucan endotransglycosylase/hydrolase, expressed primarily in the stele of mature non-elongating regions of both the main and the lateral root. Is expressed in lateral root primordia but expression ceases after lateral root begins to grow. xyloglucan endotransglucosylase/hydrolase 21 encodes a protein similar to endo xyloglucan transferase in sequence. It is also very similar to BRU1…
Wa8730a001g012130	1.55869	4.6877e-32	6.53559e-28	0.551	0.28	AT3G54040		PAR1 protein
Wa8730a014g001710	1.55017	2.5004e-54	3.48606e-50	0.298	0.053	AT5G59490 AT3G62040		Haloacid dehalogenase-like hydrolase (HAD) superfamily protein Haloacid dehalogenase-like hydrolase (HAD) superfamily protein
Wa8730a010g003610	1.52831	1.07743e-65	1.50215e-61	0.377	0.071
Wa8730a003g005740	1.52249	7.32276e-34	1.02094e-29	0.129	0.013	AT3G46860 AT5G43570		Predicted to encode a PR (pathogenesis-related) peptide that belongs to the PR-6 proteinase inhibitor family. Six putative PR-6-type protein encoding genes are found in Arabidopsis: At2g38900, At2g38870, At5g43570, At5g43580, At3g50020 and At3g46860. Predicted to encode a PR (pathogenesis-related) peptide that belongs to the PR-6 proteinase inhibitor family. Six putative PR-6-type protein encodin…
Wa8730a015g000790	1.50828	7.07017e-42	9.85723e-38	0.625	0.301	AT5G48070 AT2G18800 AT4G30270 AT4G25810 AT5G57550	ATXTH20, XTH20 ATXTH21, XTH21 MERI-5, MERI5B, SEN4, XTH24 XTH23, XTR6 XTH25, XTR3	putative xyloglucan endotransglycosylase/hydrolase, expressed primarily in the stele of mature non-elongating regions of both the main and the lateral root. Is expressed in lateral root primordia but expression ceases after lateral root begins to grow. xyloglucan endotransglucosylase/hydrolase 21 encodes a protein similar to endo xyloglucan transferase in sequence. It is also very similar to BRU1…
Wa8730a008g002350	1.48804	2.87743e-55	4.01171e-51	0.303	0.055	AT5G11540	AtGulLO3, GulLO3	Encodes a homolog of rat L-gulono-1,4-lactone (L-GulL) oxidase that is involved in the biosynthesis of L-ascorbic acid.
Wa8730a003g006100	1.47828	3.31605e-09	4.62323e-05	0.074	0.217	AT1G68300		Adenine nucleotide alpha hydrolases-like superfamily protein
Wa8730a006g000980	1.47193	2.76316e-48	3.85239e-44	0.567	0.23	AT3G22120 AT4G15160 AT1G62500	CWLP	cell wall-plasma membrane linker protein homolog (CWLP) Bifunctional inhibitor/lipid-transfer protein/seed storage 2S albumin superfamily protein Bifunctional inhibitor/lipid-transfer protein/seed storage 2S albumin superfamily protein
Wa8730a013g005360	1.46882	2.34579e-59	3.27051e-55	0.504	0.16	AT3G23920	AtBAM1, BAM1, BMY7, TR-BAMY	Encodes a chloroplast beta-amylase. Is necessary for leaf starch breakdown in the absence of BAM3.
Wa8730a004g003130	1.46607	8.99092e-23	1.25351e-18	0.529	0.32	AT3G24540	AtPERK3, PERK3	Encodes a member of the proline-rich extensin-like receptor kinase (PERK) family. This family consists of 15 predicted receptor kinases (PMID: 15653807).
Wa8730a008g005750	1.46466	6.80231e-22	9.48378e-18	0.424	0.221	AT1G11260 AT1G50310 AT4G21480	ATSTP1, STP1 ATSTP9, STP9 STP12	Encodes a H+/hexose cotransporter. sugar transporter 9 Putative sugar transporter. Expressed in nematode-induced root syncytia.
Wa8730a012g004660	1.46231	1.23943e-32	1.72802e-28	0.383	0.145
Wa8730a017g003290	1.45433	2.12586e-21	2.96388e-17	0.309	0.13	AT4G04955	ALN, ATALN	Encodes an allantoinase which is involved in allantoin degradation and assimilation. Gene expression was induced when allantoin was added to the medium. The insertion mutant, ataln m2-1, did not grow well on the MS medium where allantoin, instead of ammonium nitrate, was supplied.
Wa8730a015g003240	1.45343	1.73487e-27	2.41875e-23	0.642	0.405	AT3G30842 AT1G15520	ABCG38, ATPDR10, PDR10 ABCG40, ATABCG40, ATPDR12, PDR12	pleiotropic drug resistance 10 ABC transporter family involved in ABA transport and resistance to lead. Localizes to plasma membrane. Upregulated by lead. Expressed in leaves, flowers, stomata and roots.
Wa8730a006g001290	1.44782	3.19084e-18	4.44867e-14	0.245	0.096	AT2G32210 AT3G22240
Wa8730a007g007600	1.44512	1.67314e-61	2.3327e-57	0.388	0.084	AT5G64700 AT3G18200 AT3G53210	UMAMIT21 UMAMIT4 UMAMIT6	nodulin MtN21-like transporter family protein nodulin MtN21-like transporter family protein nodulin MtN21-like transporter family protein
Wa8730a001g012190	1.42826	2.67445e-31	3.72872e-27	0.287	0.088	AT5G01100 AT3G54100 AT2G37980	FRB1	O-fucosyltransferase family protein O-fucosyltransferase family protein O-fucosyltransferase family protein
Wa8730a017g002860	1.42102	2.36457e-24	3.29669e-20	0.43	0.228	AT4G02600 AT5G65970 AT2G39200 AT1G11310 AT2G17480	ATMLO1, MLO1 ATMLO10, MLO10 ATMLO12, MLO12 ATMLO2, MLO2, PMR2 ATMLO8, MLO8	A member of a large family of seven-transmembrane domain proteins specific to plants, homologs of the barley mildew resistance locus o (MLO) protein. The Arabidopsis genome contains 15 genes encoding MLO proteins, with localization in plasma membrane. Phylogenetic analysis revealed four clades of closely-related AtMLO genes. ATMLO1 belongs to the clade II, with ATMLO13 and ATMLO15. The gene is ex…
Wa8730a015g004220	1.4204	1.95261e-25	2.72232e-21	0.523	0.32	AT3G02360		6-phosphogluconate dehydrogenase family protein
Wa8730a004g006020	1.41344	1.70622e-38	2.37881e-34	0.43	0.169	AT1G29395	COR413-TM1, COR413IM1, COR414-TM1	Integral membrane protein in the inner envelope of chloroplasts. Provide freezing tolerance. Expression is induced by short-term cold-treatment, water deprivation, and abscisic acid treatment.
Wa8730a011g002000	1.39043	3.51357e-52	4.89862e-48	0.325	0.069
Wa8730a005g005240	1.38832	5.53486e-29	7.7167e-25	0.672	0.457	AT5G42050		DCD (Development and Cell Death) domain protein
Wa8730a007g006500	1.3877	1.36267e-47	1.89984e-43	0.474	0.167
Wa8730a011g005910	1.38245	2.48773e-64	3.46839e-60	0.65	0.236	AT5G57123 AT4G29905 AT5G10695
Wa8730a005g001590	1.36911	8.86145e-43	1.23546e-38	0.515	0.202	AT5G12020 AT5G51440	HSP17.6II	17.6 kDa class II heat shock protein HSP20-like chaperones superfamily protein
Wa8730a011g003790	1.36331	1.91173e-38	2.66533e-34	0.543	0.247	AT5G57620 AT5G67300 AT4G37260	AtMYB36, MYB36 ATMYB44, ATMYBR1, MYB44, MYBR1 ATMYB73, MYB73	Encodes a putative transcription factor (MYB36). Member of the R2R3 factor MYB gene family involved in mediating plant responses to a variety of abiotic stimiuli. Member of the R2R3 factor gene family.
Wa8730a010g000220	1.35115	1.54671e-06	0.0215642	0.325	0.244	AT3G24503	ALDH1A, ALDH2C4, REF1	Arabidopsis thaliana aldehyde dehydrogenase AtALDH1a mRNA. a sinapaldehyde dehydrogenase catalyzes both the oxidation of coniferylaldehyde and sinapaldehyde forming ferulic acid and sinapic acid, respectively
Wa8730a001g011840	1.34997	6.44772e-42	8.98941e-38	0.298	0.07	AT3G11410 AT1G07430 AT5G59220 AT2G29380	AHG3, ATPP2CA, PP2CA AIP1, AtAIP1, HAI2, HON HAI1, SAG113 HAI3	Encodes protein phosphatase 2C. Negative regulator of ABA signalling. Expressed in seeds during germination. mRNA up-regulated by drought and ABA. Encodes a member of the group A protein phosphatase 2C (PP2C) family that is responsible for negatively regulating seed dormancy. Encodes a member of the PP2C family (Clade A protein phosphatases type 2C). Functions as a negative regulator of osmotic s…
Wa8730a003g004130	1.34932	1.07361e-55	1.49682e-51	0.372	0.084	AT5G11420 AT2G41810 AT3G08030		Protein of unknown function, DUF642 Protein of unknown function, DUF642 The mRNA of this gene is expressed in viable seeds. Its detection in a dry seed lot has potential for use as a molecular marker for germination performance as absence of expression correlates with decreased germination.
Wa8730a010g000100	1.34601	7.95227e-55	1.10871e-50	0.231	0.028	AT3G16340 AT3G53480	ABCG29, ATPDR1, AtABCG29, PDR1 ABCG37, ATPDR9, PDR9, PIS1	Encodes a p-coumaryl alcohol exporter involved in lignin biosynthesis. Negative regulator of auxin polar transport inhibitors. ABCG37 regulates auxin distribution and homeostasis in roots by excluding IBA from the root apex, but does not act directly in basipetal transport. ABCG37 and ABCG36 act redundantly at outermost root plasma membranes and, transport IBA out of the cells.
Wa8730a007g002230	1.34392	6.34045e-45	8.83985e-41	0.298	0.067	AT1G78560 AT3G25410		Sodium Bile acid symporter family Sodium Bile acid symporter family
Wa8730a009g001190	1.34285	5.79947e-49	8.08562e-45	0.821	0.594	AT5G01600 AT3G11050 AT3G56090 AT2G40300	ATFER1, FER1 ATFER2, FER2 ATFER3, FER3 ATFER4, FER4	Encodes a ferretin protein that is targeted to the chloroplast. Member of a Ferritin gene family. Gene expression is induced in response to iron overload and by nitric oxide. Expression of the gene is downregulated in the presence of paraquat, an inducer of photoxidative stress. ferritin 2 Encodes FERRITIN 3, AtFER3. Ferritins are a class of 24-mer multi-meric proteins found in all kingdoms of li…
Wa8730a004g008440	1.34164	1.42904e-49	1.99237e-45	0.38	0.1
Wa8730a006g001110	1.34007	8.41648e-32	1.17343e-27	0.237	0.057	AT4G15160 AT1G62500 AT3G22142		Bifunctional inhibitor/lipid-transfer protein/seed storage 2S albumin superfamily protein Bifunctional inhibitor/lipid-transfer protein/seed storage 2S albumin superfamily protein Encodes a Protease inhibitor/seed storage/LTP family protein
Wa8730a016g004470	1.3349	7.83479e-14	1.09233e-09	0.474	0.34	AT1G60420	AtNRX1, NRX1	Reduce transmission through pollen.
Wa8730a006g000870	1.33414	1.56835e-36	2.1866e-32	0.256	0.059	AT1G79350	EMB1135	Encodes the Arabidopsis thaliana orthologue of metazoan Strawberry notch, a highly conserved co-activator of the developmental regulator Notch. It mediates stress-induced chromatin memory by modulating nucleosome occupancy by interacting with chromatin remodeling proteins of the ISWI and SWI/SNF classes.
Wa8730a014g001980	1.33332	8.17303e-23	1.13948e-18	0.331	0.144
Wa8730a003g001710	1.31496	2.15972e-39	3.01109e-35	0.444	0.168	AT3G18830 AT4G36670 AT2G16120 AT2G20780 AT2G18480 AT1G19450	ATPLT5, ATPMT5, PMT5 AtPLT6, AtPMT6, PLT6, PMT6 ATPMT1, PMT1	This gene encodes a plasma membrane-localized polyol/cyclitol/monosaccharide-H+-symporter. The symporter is able to catalyze the energy-dependent membrane passage of a wide range of linear polyols (three to six carbon backbone), of cyclic polyols (<i>myo</i>-inositol), and of numerous monosaccharides, including pyranose ring-forming and furanose ring-forming hexoses and pentoses. This gene belong…
Wa8730a003g000100	1.31035	1.289e-29	1.79713e-25	0.408	0.172	AT5G10550 AT5G65630 AT1G17790	GTE2 GTE7	This gene is predicted to encode a bromodomain-containing protein. A plant line expressing RNAi constructs targeted against GTE7 shows some resistance to agrobacterium-mediated root transformation. This gene is predicted to encode a bromodomain-containing protein. Plant lines expressing RNAi constructs targeted against GTE7 show some resistance to agrobacterium-mediated root transformation. DNA-b…
Wa8730a009g006540	1.30887	1.74486e-40	2.43268e-36	0.493	0.208	AT1G69260 AT1G13740 AT3G29575	AFP1 AFP2 AFP3	ABI five binding protein Encodes a member of a small plant-specific gene family whose members interact with ABI5 and appear to be involved in mediating stress responses. AFP2 mutants affect a number of ABA mediated processes such as germination and response to osmotic and sugar stress. AFP2 nuclear localization is stress dependent. ABI five binding protein 3
Wa8730a002g007620	1.30848	3.36527e-34	4.69186e-30	0.383	0.141	AT3G47080		Tetratricopeptide repeat (TPR)-like superfamily protein
Wa8730a017g002670	1.3068	1.33473e-29	1.86088e-25	0.248	0.069	AT2G17890 AT4G36070 AT5G66210 AT5G24430	CPK16 CPK18 CPK28	member of Calcium Dependent Protein Kinase member of Calcium Dependent Protein Kinase member of Calcium Dependent Protein Kinase Calcium-dependent protein kinase (CDPK) family protein
Wa8730a009g006210	1.30529	5.01683e-38	6.99446e-34	0.322	0.094	AT1G27770 AT3G57330 AT4G37640 AT2G22950	ACA1, PEA1 ACA11 ACA2 ACA7	Encodes a chloroplast envelope Ca2+-ATPase with an N-terminal autoinhibitor. Lesion mimic phenotype when mutation in the gene is combined with a mutation in ACA4. Lesion mimic phenotype of double knockout can be suppressed by nutritional supplements that increase anion levels (e.g. 15 mM Nitrate, Chloride, or Phosphate) Encodes a calmodulin-regulated Ca(2+)-pump located in the endoplasmic reticul…
Wa8730a002g005660	1.3003	5.74401e-39	8.0083e-35	0.264	0.06
Wa8730a011g003700	1.28702	3.34181e-18	4.65915e-14	0.449	0.279
Wa8730a014g003980	1.28279	5.91694e-24	8.2494e-20	0.372	0.172
Wa8730a001g003140	1.28224	4.89117e-39	6.81928e-35	0.705	0.447	AT5G18670	BAM9, BMY3	putative beta-amylase BMY3 (BMY3)
Wa8730a012g000770	1.27605	3.81718e-24	5.32191e-20	0.383	0.177	AT5G08720		Encodes PIN2 PROMOTER BINDING PROTEIN 1 (PPP1), an evolutionary conserved plant-specific DNA binding protein that acts on transcription of PIN genes. Also named as HCF145. Mutations in HCF145 have reduced level of the tricistronic psaA-psaB-rps (small-subunit ribosomal protein)14 mRNA which encodes for the major subunits of the photosystem I (PSI). HCF145 binds to the 5'UTR of PSAA via a novel TM…
Wa8730a001g005100	1.27009	1.43642e-19	2.00265e-15	0.402	0.221	AT5G04930	ALA1	Encodes a putative aminophospholipid translocase (p-type ATPase) involved in chilling response.
Wa8730a003g004430	1.26722	3.47239e-74	4.8412e-70	0.209	0.009	AT1G55020 AT3G22400	ATLOX1, LOX1 ATLOX5, LOX5	lipoxygenase, a defense gene conferring resistance Xanthomonas campestris Encodes lipoxygenase5 (LOX5). LOX5 activity in roots facilitates green peach aphid colonization of Arabidopsis foliage by promoting green peach aphid feeding from sieve element and water consumption from xylem.
Wa8730a009g000430	1.2408	1.38743e-33	1.93436e-29	0.298	0.089	AT2G39650		Protein of unknown function (DUF506)
Wa8730a015g001790	1.24026	3.60626e-84	5.02784e-80	0.948	0.642	AT1G80920	AtJ8, AtToc12, DJC22, J8, Toc12	A nuclear encoded soluble protein found in the chloroplast stroma.
Wa8730a012g000410	1.23843	8.02162e-35	1.11837e-30	0.377	0.132	AT2G27350	OTLD1	Encodes an otubain-like histone deubiquitinase involved in chromatin modification and regulation of plant gene expression.
Wa8730a009g003680	1.23237	1.74044e-26	2.42652e-22	0.46	0.237	AT2G41430	CID1, ERD15, LSR1	Encodes hydrophilic protein lacking Cys residues that is expressed in response to drought stress, light stress and treatment with plant-growth-promoting rhizobacteria (Paenibacillus polymyxa), possibly revealing a connection between responses to biotic and abiotic stress. Also identified as a CTC Interacting Domain (CID) protein in a yeast two hybrid screen using the PAB2 protein as bait. Contain…
Wa8730a015g000740	1.22998	2.99392e-47	4.17413e-43	0.336	0.082	AT4G31550 AT2G24570	ATWRKY11, WRKY11 ATWRKY17, WRKY17	member of WRKY Transcription Factor Group II-d negative regulator of basal resistance to Pseudomonas syringae. member of WRKY Transcription Factor Group II-d negative regulator of basal resistance to Pseudomonas syringae.
Wa8730a004g008080	1.22946	1.76336e-38	2.45848e-34	0.185	0.026	AT5G12020	HSP17.6II	17.6 kDa class II heat shock protein
Wa8730a019g001080	1.22814	2.26127e-33	3.15266e-29	0.27	0.072	AT2G30250 AT2G38470 AT5G07100	ATWRKY25, WRKY25 ATWRKY33, WRKY33 WRKY26	member of WRKY Transcription Factor Group I. Located in nucleus. Involved in response to various abiotic stresses - especially salt stress. Member of the plant WRKY transcription factor family. Regulates the antagonistic relationship between defense pathways mediating responses to P. syringae and necrotrophic fungal pathogens. Located in nucleus. Involved in response to various abiotic stresses -…
Wa8730a001g000900	1.22206	1.14908e-55	1.60204e-51	0.19	0.014
Wa8730a007g000380	1.2196	8.33752e-38	1.16242e-33	0.562	0.268	AT3G44260 AT5G22250	AtCAF1a, CAF1a AtCAF1b, CAF1b	Encodes one of the homologs of the yeast CCR4-associated factor 1: AT3G44260 (CAF1a), AT5G22250 (CAF1b). Has mRNA deadenylation activity. Also plays a role in plant defense responses. Encodes one of the homologs of the yeast CCR4-associated factor 1: AT3G44260 (CAF1a), AT5G22250 (CAF1b). Has mRNA deadenylation activity. Also plays a role in plant defense responses.
Wa8730a003g004640	1.2068	2.93661e-29	4.09422e-25	0.355	0.139	AT3G52970 AT1G74550	CYP76G1 CYP98A9	member of CYP76G member of CYP98A
Wa8730a011g000090	1.205	5.56349e-34	7.75661e-30	0.275	0.073	AT4G19230 AT5G45340 AT5G36110	CYP707A1 CYP707A3 CYP716A1	Encodes a protein with ABA 8'-hydroxylase activity, involved in ABA catabolism. Member of the CYP707A gene family. CYP707A1 appears to play an important role in determining the ABA levels in dry seeds. Gene involved in postgermination growth. Overexpression of CYP707A1 leads to a decrease in ABA levels and a reduction in after-ripening period to break dormancy. Encodes a protein with ABA 8'-hydro…
Wa8730a011g002350	1.2017	8.80666e-29	1.22782e-24	0.204	0.047	AT5G47120 AT4G17580	ATBI-1, ATBI1, BI-1, BI1	Encodes BI-1, a homolog of mammalian Bax inhibitor 1. Functions as an attenuator of biotic and abiotic types of cell death. Bax-induced cell death can be downregulated by ectopically expressing AtBI in planta. Bax inhibitor-1 family protein
Wa8730a003g005730	1.20106	2.56309e-32	3.57345e-28	0.171	0.028	AT3G46860 AT5G43570		Predicted to encode a PR (pathogenesis-related) peptide that belongs to the PR-6 proteinase inhibitor family. Six putative PR-6-type protein encoding genes are found in Arabidopsis: At2g38900, At2g38870, At5g43570, At5g43580, At3g50020 and At3g46860. Predicted to encode a PR (pathogenesis-related) peptide that belongs to the PR-6 proteinase inhibitor family. Six putative PR-6-type protein encodin…
Wa8730a009g001650	1.19768	3.95874e-36	5.51927e-32	0.22	0.043	AT2G29890 AT2G41740 AT3G57410	ATVLN1, VLN1 ATVLN2, VLN2 ATVLN3, VLN3	Encodes a ubiquitously expressed villin-like protein, whose mRNA may be alternatively processed. Villin belongs to a superfamily of actin binding proteins called the villin/gelsolin family. Animal villins are involved in actin binding. VLN1 protein co-localizes with actin filaments in several assays. VLN1 binds and bundles F-actin in a calcium-independent manner. It does not nucleate, cap or seve…
Wa8730a001g002610	1.19583	8.60429e-19	1.19961e-14	0.449	0.272	AT4G15530	PPDK	Encodes a dual-targeted protein believed to act as a pyruvate, orthophosphate dikinase. These enzymes are normally associated with C4 photosynthesis which does not occur in Arabidopsis. However, PPDK may play a role in remobilizing nitrogen during leaf senescence in Arabidopsis. The product of the long transcript (.1 gene model) was shown to be targeted to the chloroplast, whereas the shorter tra…
Wa8730a003g007810	1.19344	9.35904e-18	1.30484e-13	0.388	0.223	AT5G58375 AT5G18150 AT5G14602		Methyltransferase-related protein Methyltransferase-related protein
Wa8730a011g003230	1.19288	1.88414e-16	2.62686e-12	0.116	0.026	AT1G73680	ALPHA, alpha-DOX2	Encodes an alpha dioxygenase. Recombinant protein catalyzes the conversion of a wide range of fatty acids into 2(R)-hydroperoxy derivatives.
Wa8730a015g001600	1.18966	8.33122e-22	1.16154e-17	0.292	0.111	AT4G30280 AT5G48070 AT2G18800 AT4G25810 AT5G57550	ATXTH18, XTH18 ATXTH20, XTH20 ATXTH21, XTH21 XTH23, XTR6 XTH25, XTR3	Encodes a xyloglucan endotransglucosylase/hydrolase with only only the endotransglucosylase (XET EC 2.4.1.207) activity towards xyloglucan and non-detectable endohydrolytic (XEH EC 3.2.1.151) activity. Expressed in the mature or basal regions of both the main and lateral roots, but not in the tip of these roots where cell division occurs. putative xyloglucan endotransglycosylase/hydrolase, expres…
Wa8730a003g005710	1.18723	7.96126e-19	1.10996e-14	0.295	0.128	AT4G08580		microfibrillar-associated protein-related
Wa8730a014g006110	1.18356	2.59003e-26	3.61102e-22	0.322	0.125	AT1G14370 AT4G35600 AT2G17220 AT3G55450 AT1G76360 AT1G18160 AT5G03320	APK2A, Kin1, PBL2 CST, CX32, Kin4 Kin3 PBL1	Encodes protein kinase APK2a. plant-type connexin (gap junction-type protein), a component of plasmodesmata Encodes a putative serine/threonine-specific protein kinase kin3. Protein is N-myristoylated. PBS1-like 1 Protein kinase superfamily protein Protein kinase superfamily protein Protein kinase superfamily protein
Wa8730a011g005690	1.18334	5.86581e-13	8.17812e-09	0.187	0.076
Wa8730a005g004230	1.18025	1.60896e-43	2.24321e-39	0.262	0.051	AT1G64350	SEH1H	seh1-like protein
Wa8730a006g001280	1.17974	6.63638e-19	9.25245e-15	0.331	0.148	AT2G32210 AT3G22240
Wa8730a017g001840	1.1748	6.10163e-31	8.5069e-27	0.361	0.132	AT5G51460 AT4G12430 AT4G22590	ATTPPA, TPPA TPPF TPPG	homologous to the C-terminal part of microbial trehalose-6-phosphate phosphatases Haloacid dehalogenase-like hydrolase (HAD) superfamily protein Haloacid dehalogenase-like hydrolase (HAD) superfamily protein
Wa8730a018g000340	1.16593	9.83209e-19	1.37079e-14	0.234	0.088	AT5G59570 AT3G46640 AT3G10760	BOA LUX, PCL1	Encodes BOA (BROTHER OF LUX ARRHYTHMO), a component of the circadian clock. The mRNA is cell-to-cell mobile. Encodes a myb family transcription factor with a single Myb DNA-binding domain (type SHAQKYF) that is unique to plants and is essential for circadian rhythms, specifically for transcriptional regulation within the circadian clock. LUX is required for normal rhythmic expression of multiple …
Wa8730a018g003980	1.15531	2.91812e-46	4.06844e-42	0.215	0.029	AT4G16230		GDSL-motif esterase/acyltransferase/lipase. Enzyme group with broad substrate specificity that may catalyze acyltransfer or hydrolase reactions with lipid and non-lipid substrates.
Wa8730a005g006550	1.14562	7.08766e-43	9.88162e-39	0.606	0.292	AT3G27880 AT5G14730		Protein of unknown function (DUF1645)
Wa8730a014g004410	1.143	1.52173e-43	2.1216e-39	0.758	0.458
Wa8730a016g004010	1.1406	1.14662e-42	1.59862e-38	0.275	0.058
Wa8730a003g006350	1.14026	3.04789e-29	4.24936e-25	0.24	0.064	AT5G09410 AT2G22300 AT1G77680	CAMTA1, EICBP.B CAMTA3, SR1	calmodulin-binding protein, similar to another ethylene-upregulated calmodulin-binding protein ER1 GI:11612392 from (Nicotiana tabacum) Encodes a putative CAM binding transcription factor. Loss of function mutations show enhanced resistance to fungal and bacterial pathogens suggesting that CAMTA functions to suppress defense responses. Ribonuclease II/R family protein
Wa8730a005g006560	1.13814	2.97688e-33	4.15036e-29	0.262	0.069
Wa8730a016g004300	1.13812	7.766e-28	1.08274e-23	0.394	0.167	AT1G02305 AT4G16190		Encodes a capase involved in stress induced cell death. Papain family cysteine protease
Wa8730a010g001960	1.13647	1.0354e-36	1.44356e-32	0.463	0.18	AT2G31090 AT2G20562		Encodes a signalling peptide influencing lateral organ separation. Encodes a putative signalling peptide with similarity to TAX1. No known function has been demonstrated yet.
Wa8730a002g001840	1.13586	1.07531e-15	1.4992e-11	0.331	0.176	AT4G39090 AT3G49340 AT2G21430	RD19, RD19A	Similar to cysteine proteinases, induced by desiccation but not abscisic acid. Required for RRS1-R mediated resistance against Ralstonia solanacearum. Interacts with the R. solanacearum type III effector PopP2. RD19 associates with PopP2 to form a nuclear complex that is required for activation of the RRS1-Rmediated resistance response. Cysteine proteinases superfamily protein Papain family cyste…
Wa8730a001g000570	1.13218	6.09151e-57	8.49279e-53	0.264	0.037	AT1G02400 AT1G47990	ATGA2OX4, ATGA2OX6, DTA1, GA2OX6 ATGA2OX4, GA2OX4	Encodes a gibberellin 2-oxidase that acts on C19 gibberellins but not C20 gibberellins. Encodes a gibberellin 2-oxidase that acts on C19 gibberellins. AtGA2OX4 expression is responsive to cytokinin and KNOX activities.
Wa8730a013g004060	1.13093	1.77194e-29	2.47044e-25	0.264	0.077	AT5G23210 AT5G08260 AT3G63470	SCPL34 scpl35 scpl40	serine carboxypeptidase-like 34 serine carboxypeptidase-like 35 serine carboxypeptidase-like 40
Wa8730a011g005580	1.12546	1.98337e-17	2.76522e-13	0.264	0.113	AT4G30370 AT5G42200	IDF1	RING/U-box superfamily protein RING/U-box superfamily protein
Wa8730a011g004900	1.10863	7.72581e-12	1.07713e-07	0.408	0.277	AT5G56030 AT2G04030	AtHsp90.2, ERD8, HSP81-2, HSP81.2, HSP90.2 AtHsp90.5, AtHsp90C, CR88, EMB1956, HSP90.5, Hsp88.1	A member of heat shock protein 90 (HSP90) gene family. Expressed in all tissues and abundant in root apical meristem, pollen and tapetum. Expression is NOT heat-induced but induced by IAA and NaCl. Interacts with HsfA1d in the cytosol and the nucleus and negatively regulates HsfA1d. Did not bind to AtHsfA4c. Encodes a chloroplast-targeted 90-kDa heat shock protein located in the stroma involved i…
Wa8730a012g004840	1.10538	1.70332e-31	2.37477e-27	0.427	0.177	AT1G78080 AT1G22190 AT2G22200 AT4G39780 AT5G65130 AT1G36060	AtWIND1, RAP2.4, WIND1 RAP2.4	Encodes a member of the DREB subfamily A-6 of ERF/AP2 transcription factor family (RAP2.4). The protein contains one AP2 domain. Role in mediating light and ethylene signaling. The gene encodes a putative transcription factor belongings to the abiotic stress-associated DREB A-6 clade. The mRNA is cell-to-cell mobile. encodes a member of the DREB subfamily A-6 of ERF/AP2 transcription factor famil…
Wa8730a020g001370	1.10417	1.26006e-10	1.75678e-06	0.501	0.394	AT2G33480 AT5G13180	ANAC041, NAC041 ANAC083, NAC083, VNI2	NAC domain containing protein 41 Encodes a NAC domain transcription factor that interacts with VND7 and negatively regulates xylem vessel formation.
Wa8730a011g003860	1.10318	2.88015e-21	4.0155e-17	0.523	0.333	AT4G22260	IM, IM1, PTOX	Similar to mitochondrial alternative oxidase. im mutants have a variegated phenotype and fail to differentiate chloroplasts in the majority of their cells under high light intensity continuous illumination. The white tissues of immutans accumulate phytoene, a non-colored C40 carotenoid intermediate. This suggests that immutans controls, either directly or indirectly, the activity of phytoene desa…
Wa8730a004g003870	1.10273	8.52325e-26	1.18831e-21	0.171	0.037
Wa8730a006g000510	1.10066	1.63225e-37	2.27568e-33	0.504	0.214	AT3G15210 AT3G20310 AT1G12980	ATERF-4, ATERF4, ERF4, RAP2.5 ATERF-7, ATERF7, ERF7 DRN, ESR1	Encodes a member of the ERF (ethylene response factor) subfamily B-1 of ERF/AP2 transcription factor family (ATERF-4). The protein contains one AP2 domain. Acts as a negative regulator of JA-responsive defense gene expression and resistance to the necrotrophic fungal pathogen Fusarium oxysporum and antagonizes JA inhibition of root elongation. Encodes a member of the ERF (ethylene response factor…
Wa8730a001g003150	1.09615	1.68952e-29	2.35553e-25	0.358	0.131	AT5G18680 AT2G47900 AT1G47270 AT3G06380	AtTLP11, TLP11 AtTLP3, TLP3 AtTLP6, TLP6 ATTLP9, TLP9	Member of TLP family Member of TLP family Member of TLP family Member of TLP family
Wa8730a015g001350	1.0875	4.41752e-49	6.1589e-45	0.149	0.008	AT4G28050 AT2G23810 AT4G30430	TET7 TET8 TET9	Member of TETRASPANIN family Member of TETRASPANIN family Member of TETRASPANIN family
Wa8730a001g002190	1.08244	4.19998e-21	5.85562e-17	0.421	0.212	AT5G19120 AT1G03220		Eukaryotic aspartyl protease family protein Eukaryotic aspartyl protease family protein
Wa8730a012g005080	1.07978	1.90112e-21	2.65054e-17	0.565	0.405	AT5G09930 AT5G64840 AT4G33460 AT2G22120	ABCF2 ABCF5, ATGCN5, GCN5 ABCI10, ATNAP13, EMB2751	member of GCN subfamily member of GCN subfamily member of NAP subfamily RING/FYVE/PHD zinc finger superfamily protein
Wa8730a014g005560	1.07946	1.04065e-15	1.45087e-11	0.331	0.171	AT4G35040 AT2G16770	bZIP19 bZIP23	Basic-region leucine zipper (bZIP19) transcription factor involved in the adaptation to zinc deficiency. Binds ZDRE motifs. Basic-region leucine zipper (bZIP23) transcription factor involved in the adaptation to zinc deficiency. Binds ZDRE motifs.
Wa8730a010g004820	1.0773	3.02822e-35	4.22194e-31	0.149	0.017	AT5G15730 AT5G47850 AT4G31250	AtCRLK2, CRLK2 CCR4	Protein kinase superfamily protein CRINKLY4 related 4 Leucine-rich repeat protein kinase family protein
Wa8730a018g001130	1.06723	7.67017e-18	1.06938e-13	0.325	0.159	AT2G38280	ATAMPD, FAC1	Encodes a protein with in vitro AMP deaminase activity that is involved in embryogenesis. Homozygous mutant embryos fail to develop past the zygote stage.
Wa8730a002g005830	1.0647	2.29949e-14	3.20595e-10	0.185	0.069	AT1G76520 AT5G65980 AT2G17500 AT1G20925		Auxin efflux carrier family protein Auxin efflux carrier family protein Auxin efflux carrier family protein Auxin efflux carrier family protein
Wa8730a006g005110	1.06431	6.13195e-15	8.54916e-11	0.311	0.161	AT5G07340		Calreticulin family protein
Wa8730a005g008320	1.06042	2.30002e-30	3.20669e-26	0.209	0.047	AT1G26150 AT1G70740 AT1G49100 AT1G29740	AtPERK10, PERK10	Encodes a member of the proline-rich extensin-like receptor kinase (PERK) family. This family consists of 15 predicted receptor kinases (PMID: 15653807). Protein kinase superfamily protein Leucine-rich repeat protein kinase family protein Leucine-rich repeat transmembrane protein kinase
Wa8730a001g005860	1.05891	2.63651e-40	3.67582e-36	0.245	0.047	AT2G33050 AT1G58190 AT3G51740	AtRLP26, RLP26 AtRLP9, RLP9 IMK2	receptor like protein 26 receptor like protein 9 encodes a leucine-repeat receptor kinase expressed in inflorescence meristem. Locus association was made from performing sequence analysis with IMK3 (MRLK) whose locus association was provided by the authors.
Wa8730a013g004490	1.05813	1.30112e-33	1.81403e-29	0.917	0.802	AT2G31570 AT3G63080 AT1G63460	ATGPX2, GPX2 ATGPX5, GPX5, MEE42 ATGPX8, GPX8	glutathione peroxidase GPx Encodes glutathione peroxidase. Encodes GPX8 (glutathione peroxidase 8). Involved in the suppression of oxidative damages in nucleus and cytosol. The mRNA is cell-to-cell mobile.
Wa8730a015g002360	1.05733	4.17355e-26	5.81877e-22	0.482	0.254	AT4G32030
Wa8730a004g008620	1.05318	7.2696e-18	1.01353e-13	0.168	0.05	AT1G15460 AT4G32510 AT5G25430	ATBOR4, BOR4	Encodes a efflux-type boron transporter. Over-expression improved plant growth under B toxic conditions. HCO3- transporter family HCO3- transporter family
Wa8730a001g011500	1.05235	2.22224e-40	3.09824e-36	0.281	0.065	AT2G29735 AT3G55430 AT4G34480 AT2G39640 AT3G46570	NA	NA O-Glycosyl hydrolases family 17 protein O-Glycosyl hydrolases family 17 protein glycosyl hydrolase family 17 protein Glycosyl hydrolase superfamily protein
Wa8730a005g001580	1.05155	1.62745e-20	2.26899e-16	0.3	0.124	AT5G12020	HSP17.6II	17.6 kDa class II heat shock protein
Wa8730a002g004470	1.05123	1.28429e-16	1.79055e-12	0.325	0.168	AT1G20110		Encodes a protein that is localized to the peripheral membrane of late endosomal compartments. Involved in the regulation of mulitivesicular/prevacuolar compartment protein sorting. Loss of function mutations are embryo lethal. Regulates IRT1-dependent metal transport and metal homeostasis. The mRNA is cell-to-cell mobile.
Wa8730a011g005620	1.04953	4.45426e-18	6.21013e-14	0.259	0.106	AT2G24720 AT4G31710 AT5G11180	ATGLR2.2, GLR2.2 ATGLR2.4, AUG8, GLR2.4 ATGLR2.6, GLR2.6	member of Putative ligand-gated ion channel subunit family member of Putative ligand-gated ion channel subunit family member of Putative ligand-gated ion channel subunit family
Wa8730a009g000380	1.04786	8.4669e-15	1.18046e-10	0.256	0.118	AT3G53880 AT2G37770	AKR4C11 AKR4C9, ChlAKR	NAD(P)-linked oxidoreductase superfamily protein Encodes an NADPH-dependent aldo-keto reductase that can act on a wide variety of substrates in vitro including saturated and unsaturated aldehydes, steroids, and sugars. GFP-tagged AKR4C9 localizes to the chloroplast where it may play a role in detoxifying reactive carbonyl compounds that threaten to impair the photosynthetic process. Transcript le…
Wa8730a005g002190	1.04344	1.71725e-27	2.3942e-23	0.229	0.062	AT4G33050 AT3G13600 AT3G52870 AT5G57010 AT2G26190	AtIQM1, EDA39, IQM1	Encodes a calmodulin-binding protein involved in stomatal movement. calmodulin-binding family protein IQ calmodulin-binding motif family protein calmodulin-binding family protein calmodulin-binding family protein
Wa8730a006g002900	1.0405	1.90669e-07	0.00265831	0.369	0.271	AT3G25230 AT5G48570	ATFKBP62, FKBP62, ROF1 ATFKBP65, FKBP65, ROF2	Encodes a a high molecular weight member of the FK506 binding protein (FKBP) family. It has three FKBP12-like domains, tetratricopeptide repeats, and a putative calmodulin binding domain. Modulates thermotolerance by interacting with HSP90.1 and affecting the accumulation of HsfA2-regulated sHSPs. Encodes one of the 36 carboxylate clamp (CC)-tetratricopeptide repeat (TPR) proteins (Prasad 2010, P…
Wa8730a013g004440	1.03893	1.85795e-18	2.59035e-14	0.54	0.384	AT5G23760 AT5G53880		Copper transport protein family
Wa8730a003g002080	1.03752	1.23333e-35	1.7195e-31	0.796	0.554	AT5G67450 AT3G19580 AT5G43170 AT1G27730 AT3G49930 AT1G49900	AZF1, ZF1 AZF2, ZF2 AZF3, ZF3 STZ, ZAT10	Encodes zinc-finger protein. mRNA levels are elevated in response to low temperature, cold temperatures and high salt. The protein is localized to the nucleus and acts as a transcriptional repressor. Encodes zinc finger protein. mRNA levels are upregulated in response to ABA, high salt, and mild dessication. The protein is localized to the nucleus and acts as a transcriptional repressor. Encodes …
Wa8730a009g004010	1.0369	2.53828e-26	3.53887e-22	0.57	0.32	AT2G47260 AT5G49520 AT3G62340 AT5G13080	ATWRKY23, WRKY23 ATWRKY48, WRKY48 AtWRKY68, WRKY68 ATWRKY75, WRKY75	Encodes a member of WRKY Transcription Factor Group I. Involved in nematode feeding site establishment. Encodes WRKY48, a member of the WRKY Transcription Factor. WRKY48 is a stress- and pathogen-induced transcriptional activator that represses plant basal defense. member of WRKY Transcription Factor Group II-c WRKY75 is one of several transcription factors induced during Pi deprivation. It is nu…
Wa8730a017g003160	1.03647	1.47822e-17	2.06094e-13	0.413	0.242
Wa8730a008g003440	1.03122	9.32927e-13	1.30069e-08	0.375	0.237	AT1G30640 AT3G23310 AT2G20470		Protein kinase family protein AGC (cAMP-dependent, cGMP-dependent and protein kinase C) kinase family protein AGC (cAMP-dependent, cGMP-dependent and protein kinase C) kinase family protein
Wa8730a006g001210	1.03092	3.3897e-27	4.72592e-23	0.157	0.028	AT2G32210 AT3G22240
Wa8730a011g002740	1.03016	1.66545e-27	2.32197e-23	0.559	0.312
Wa8730a014g004960	1.02994	7.76002e-18	1.0819e-13	0.433	0.263	AT4G22690 AT4G12320 AT2G45580 AT3G61040 AT5G04630	CYP706A1 CYP706A6 CYP76C3 CYP76C7 CYP77A9	member of CYP706A member of CYP706A member of CYP76C encodes a protein with cytochrome P450 domain member of CYP77A
Wa8730a011g002170	1.02671	1.08985e-45	1.51946e-41	0.196	0.023
Wa8730a017g002450	1.02625	5.85142e-08	0.000815805	0.152	0.071	AT2G17840 AT3G51250 AT4G35985	ERD7	Identified as drought-inducible gene by differential hybridization. Upregulated by high light, drought, cold and salt stress determined by microarray analysis. Senescence/dehydration-associated protein-related Senescence/dehydration-associated protein-related
Wa8730a010g001140	1.0248	5.43877e-50	7.58273e-46	0.603	0.244	AT4G29190 AT2G25900 AT2G19810 AT1G03790 AT5G44260	AtC3H49, AtOZF2, AtTZF3, OZF2, TZF3 ATCTH, ATTZF1 AtOZF1, AtTZF2, OZF1, TZF2 AtTZF4, SOM, TZF4 AtTZF5, TZF5	Zinc finger C-x8-C-x5-C-x3-H type family protein putative Cys3His zinc finger protein (ATCTH) mRNA, complete Encodes Oxidation-related Zinc Finger 1 (OZF1), a plasma membrane protein involved in oxidative stress. Encodes SOMNUS (SOM), a nucleus-localized CCCH-type zinc finger protein. SOM negatively regulates light-dependent seed germination downstream of PIL5 (AT2G20180). Encodes a Tandem CCCH Z…
Wa8730a006g005680	1.024	2.84571e-11	3.9675e-07	0.331	0.203	AT1G22280 AT1G78200 AT1G34750	PAPP2C	Encodes a phytochrome-associated protein, PAPP2C (phytochrome-associated protein phosphatase type 2C). PAPP2C interacts in the nucleus with phyA (phytochrome A) and phyB. Functions as a regulator of phytochrome-interacting factor PIF3 by dephosphorylating phytochromes in the nucleus. Protein phosphatase 2C family protein Protein phosphatase 2C family protein
Wa8730a001g004200	1.02245	3.17805e-24	4.43084e-20	0.275	0.097	AT4G02075 AT1G02610	PIT1	RING/FYVE/PHD zinc finger superfamily protein RING/FYVE/PHD zinc finger superfamily protein
Wa8730a015g004620	1.02122	2.69333e-16	3.75503e-12	0.196	0.07
Wa8730a017g003280	1.01954	1.10595e-17	1.54192e-13	0.237	0.091
Wa8730a005g008430	1.01315	1.43397e-44	1.99924e-40	0.854	0.597	AT1G67090 AT5G38430	RBCS1A RBCS1B	Encodes a member of the Rubisco small subunit (RBCS) multigene family: RBCS1A (At1g67090), RBCS1B (At5g38430), RBCS2B (At5g38420), and RBCS3B (At5g38410). Functions to yield sufficient Rubisco content for leaf photosynthetic capacity. Encodes a member of the Rubisco small subunit (RBCS) multigene family: RBCS1A (At1g67090), RBCS1B (At5g38430), RBCS2B (At5g38420), and RBCS3B (At5g38410).
Wa8730a011g005220	1.00919	2.81554e-33	3.92543e-29	0.78	0.572	AT2G25090 AT4G30960 AT5G58380 AT5G45820 AT5G25110 AT5G10930	AtCIPK16, CIPK16, SnRK3.18 ATCIPK6, CIPK6, SIP3, SNRK3.14 CIPK10, PKS2, SIP1, SNRK3.8 CIPK20, PKS18, SnRK3.6 CIPK25, SnRK3.25 CIPK5, SnRK3.24	Encodes a member of the SNF1-related kinase (SnRK) gene family (SnRK3.18), which has also been reported as a member of the CBL-interacting protein kinases (CIPK16). Encodes CBL-interacting protein kinase 6 (CIPK6). Required for development and salt tolerance. Encodes a CBL-interacting protein kinase with similarity to SOS protein kinase. Encodes a CBL-interacting serine/threonine protein kinase c…
Wa8730a006g000010	1.00403	8.66381e-23	1.20791e-18	0.223	0.067
Wa8730a015g004800	1.00043	4.62433e-11	6.44723e-07	0.264	0.143

## Sheet: Dawn C3 DEGs
Dataset S8. Differentially Expressed Genes for Dawn Cluster 3
Genes showing significant differential expression (log2FC>1 & p_val_adj <0.05 & PCT1 > 10%) in the given cluster versus all other cells in the dawn dataset
PCT1: Percentage of cells within the cluster expressing the gene
PCT2: Percentage of cells outside the cluster expressing the gene
Gene	Ave. Log2 FC	p Value	p Value Adj.	PCT1	PCT2	Arabidopsis orthologues	Arabidopsis gene names	Arabidopsis gene description
Wa8730a018g002300	3.1624	3.52649e-224	4.91663e-220	0.973	0.201	AT5G57800	CER3, FLP1, WAX2, YRE	encodes a transmembrane protein with similarity to the sterol desaturase family at the N-terminus and to the short-chain dehydrogenase/reductase family at the C-terminus. Mutant analyses indicate this protein is involved in cuticle membrane and wax biosynthesis.
Wa8730a003g005260	2.83346	9.48834e-201	1.32286e-196	0.991	0.264	AT1G68530 AT1G25450 AT2G26640 AT4G34510 AT5G43760 AT1G19440	CER6, CUT1, G2, KCS6, POP1 CER60, KCS5 KCS11 KCS17 KCS20 KCS4	Encodes KCS6, a member of the 3-ketoacyl-CoA synthase family involved in the biosynthesis of VLCFA (very long chain fatty acids). Encodes KCS5, a member of the 3-ketoacyl-CoA synthase family involved in the biosynthesis of VLCFA (very long chain fatty acids). Encodes KCS11, a member of the 3-ketoacyl-CoA synthase family involved in the biosynthesis of VLCFA (very long chain fatty acids). Encodes …
Wa8730a013g005140	2.74029	3.59474e-184	5.01178e-180	0.922	0.197
Wa8730a014g001630	2.68908	2.29023e-186	3.19304e-182	0.916	0.175
Wa8730a014g005820	2.63582	2.23577e-218	3.11712e-214	0.988	0.2	AT3G10280 AT4G34510 AT1G04220 AT5G43760 AT1G19440 AT2G16280	KCS14 KCS17 KCS2 KCS20 KCS4 KCS9	Encodes KCS14, a member of the 3-ketoacyl-CoA synthase family involved in the biosynthesis of VLCFA (very long chain fatty acids). Encodes KCS17, a member of the 3-ketoacyl-CoA synthase family involved in the biosynthesis of VLCFA (very long chain fatty acids). Encodes KCS2, a member of the 3-ketoacyl-CoA synthase family involved in the biosynthesis of VLCFA (very long chain fatty acids). Encodes…
Wa8730a001g007340	2.58169	9.00815e-175	1.25592e-170	0.961	0.243	AT2G18800 AT2G06850 AT4G30270 AT4G14130 AT4G25810 AT5G57550	ATXTH21, XTH21 EXGT-A1, EXT, XTH4 MERI-5, MERI5B, SEN4, XTH24 XTH15, XTR7 XTH23, XTR6 XTH25, XTR3	xyloglucan endotransglucosylase/hydrolase 21 endoxyloglucan transferase (EXGT-A1) gene encodes a protein similar to endo xyloglucan transferase in sequence. It is also very similar to BRU1 in soybean, which is involved in brassinosteroid response. xyloglucan endotransglycosylase-related protein (XTR7) xyloglucan endotransglycosylase-related protein (XTR6) xyloglucan endotransglycosylase-related p…
Wa8730a015g005520	2.52093	1.88433e-210	2.62714e-206	0.976	0.177
Wa8730a005g003480	2.49274	1.37778e-169	1.9209e-165	0.84	0.144	AT5G25610	ATRD22, RD22	responsive to dehydration 22 (RD22) mediated by ABA
Wa8730a005g004920	2.47569	1.90903e-123	2.66156e-119	0.572	0.079
Wa8730a009g003660	2.47004	1.39992e-81	1.95177e-77	0.729	0.246	AT2G38530	LP2, LTP2, cdf3	Involved in lipid transfer between membranes. Belongs to a family of Lipid transfer proteins. Sequence similarity to other plant/Arabidopsis LPT genes but highest similarity to LPT1. Stress and pathogen-inducible motifs found in the upstream region. Expressed in flower, leaves and siliques but absent in roots. Predicted to be a member of PR-14 pathogenesis-related protein family with the followin…
Wa8730a001g001120	2.34159	1.62892e-176	2.27104e-172	0.967	0.213
Wa8730a014g001620	2.30988	5.19823e-171	7.24737e-167	0.864	0.147
Wa8730a009g001610	2.26774	2.79237e-140	3.89312e-136	0.943	0.285	AT5G59320	LTP3	Predicted to encode a PR (pathogenesis-related) protein. Belongs to the lipid transfer protein (PR-14) family with the following members: At2g38540/LTP1, At2g38530/LTP2, At5g59320/LTP3, At5g59310/LTP4, At3g51600/LTP5, At3g08770/LTP6, At2g15050/LTP7, At2g18370/LTP8, At2g15325/LTP9, At5g01870/LTP10, At4g33355/LTP11, At3g51590/LTP12, At5g44265/LTP13, At5g62065/LTP14, At4g08530/LTP15.
Wa8730a007g007620	2.26498	2.11355e-166	2.94671e-162	0.69	0.086
Wa8730a003g005060	2.21535	5.86997e-193	8.18392e-189	0.883	0.134	AT1G68530 AT1G25450 AT2G26640 AT4G34510 AT5G43760 AT1G19440	CER6, CUT1, G2, KCS6, POP1 CER60, KCS5 KCS11 KCS17 KCS20 KCS4	Encodes KCS6, a member of the 3-ketoacyl-CoA synthase family involved in the biosynthesis of VLCFA (very long chain fatty acids). Encodes KCS5, a member of the 3-ketoacyl-CoA synthase family involved in the biosynthesis of VLCFA (very long chain fatty acids). Encodes KCS11, a member of the 3-ketoacyl-CoA synthase family involved in the biosynthesis of VLCFA (very long chain fatty acids). Encodes …
Wa8730a002g009150	2.16277	4.62026e-207	6.44156e-203	0.816	0.094	AT1G65060 AT4G19010	4CL3	encodes an isoform of 4-coumarate:CoA ligase (4CL), which is involved in the last step of the general phenylpropanoid pathway. mRNA levels are not induced in response to wounding or to fungal infection by P. parasitica. mRNA is expressed in flowers, to a lesser degree in mature leaves and siliques and marginally in seedling roots and bolting stems of mature plants. The catalytic efficiency was in…
Wa8730a005g008830	2.1546	2.41313e-133	3.36439e-129	1	0.51	AT1G30020		Protein of unknown function, DUF538
Wa8730a004g007430	2.12276	2.43082e-133	3.38905e-129	0.997	0.669
Wa8730a016g003000	2.12119	1.11992e-137	1.5614e-133	0.997	0.521	AT1G68530 AT1G25450 AT2G26640 AT1G19440 AT1G71160	CER6, CUT1, G2, KCS6, POP1 CER60, KCS5 KCS11 KCS4 KCS7	Encodes KCS6, a member of the 3-ketoacyl-CoA synthase family involved in the biosynthesis of VLCFA (very long chain fatty acids). Encodes KCS5, a member of the 3-ketoacyl-CoA synthase family involved in the biosynthesis of VLCFA (very long chain fatty acids). Encodes KCS11, a member of the 3-ketoacyl-CoA synthase family involved in the biosynthesis of VLCFA (very long chain fatty acids). Encodes …
Wa8730a013g002970	2.10796	1.08445e-91	1.51193e-87	0.675	0.177
Wa8730a007g009040	2.08249	1.64972e-104	2.30004e-100	0.91	0.353	AT1G35140 AT5G09440	EXL1, PHI-1 EXL4	At1g35140 (At1g35140/T32G9_32) mRNA, complete cds EXORDIUM like 4
Wa8730a009g001730	2.06098	8.905e-153	1.24154e-148	0.997	0.374	AT2G41290 AT1G08470 AT3G57030 AT3G51440	SSL2 SSL3	Although this enzyme is predicted to encode a strictosidine synthase (SS), it lacks a conserved catalytic glutamate residue found in active SS enzymes and it is not expected to have SS activity. Although this enzyme is predicted to encode a strictosidine synthase (SS), it lacks a conserved catalytic glutamate residue found in active SS enzymes and it is not expected to have SS activity. Calcium-d…
Wa8730a015g005080	2.00134	1.1018e-229	1.53613e-225	0.904	0.102
Wa8730a008g000530	1.9988	1.0543e-147	1.46991e-143	0.877	0.184
Wa8730a010g004460	1.99323	3.65832e-109	5.10043e-105	0.855	0.289	AT5G42380 AT1G76650	CML37 CML38	calmodulin like 37 calmodulin-like 38
Wa8730a004g004080	1.99218	1.57547e-163	2.19652e-159	0.819	0.147	AT1G16500 AT1G79160
Wa8730a012g001190	1.98631	2.59076e-197	3.61204e-193	0.858	0.131	AT3G12203 AT1G33540 AT5G09640 AT3G52000	scpl17 scpl18 SCPL19, SNG2 scpl36	serine carboxypeptidase-like 17 serine carboxypeptidase-like 18 encodes a serine carboxypeptidase-like (SCPL) protein. Mutants accumulate sinapoylglucose instead of sinapoylcholine, and have increased levels of choline and decreased activity of the enzyme sinapoylglucose:choline sinapoyltransferase. serine carboxypeptidase-like 36
Wa8730a007g000880	1.9802	7.4263e-115	1.03537e-110	0.886	0.304	AT3G53190 AT3G01270 AT3G27400 AT4G24780 AT1G67750 AT5G04310 AT5G63180 AT3G24670 AT5G48900 AT4G13710 AT1G04680		Pectin lyase-like superfamily protein Pectate lyase family protein Encodes a pectate lyase involved in response to nematodes. Encodes a pectate lyase involved in response to nematodes. Pectate lyase family protein Pectin lyase-like superfamily protein Pectin lyase-like superfamily protein Pectin lyase-like superfamily protein Pectin lyase-like superfamily protein Pectin lyase-like superfamily pro…
Wa8730a011g004730	1.95991	7.8258e-177	1.09107e-172	0.705	0.078	AT5G57800	CER3, FLP1, WAX2, YRE	encodes a transmembrane protein with similarity to the sterol desaturase family at the N-terminus and to the short-chain dehydrogenase/reductase family at the C-terminus. Mutant analyses indicate this protein is involved in cuticle membrane and wax biosynthesis.
Wa8730a020g002750	1.94776	2.19123e-193	3.05501e-189	0.852	0.113	AT1G67730 AT1G24470	ATKCR1, KCR1, YBR159 ATKCR2, KCR2	Encodes one of the two Arabidopsis homologues to YBR159w encoding a S. cerevisiae beta-ketoacyl reductase (KCR), which catalyzes the first reduction during VLCFA (very long chain fatty acids, >18 carbon) elongation: KCR1 (At1g67730), KCR2 (At1g24470). Complementation of the yeast ybr159Delta mutant demonstrated that the two KCR proteins are divergent and that only AtKCR1 can restore heterologous …
Wa8730a011g001270	1.94432	6.13631e-194	8.55525e-190	0.901	0.161	AT1G76470 AT1G65010		NAD(P)-binding Rossmann-fold superfamily protein Putative role in flower development. Comparison of SALK_061426C to Columbia wild type in normal lighting and under low light of 33 micromoles per meter-squared per second resulted in a trend toward earlier bolting in the mutant under low light (P=0.055) (Ann Stapleton and Patrick Pridgen, 2009, personal communication).
Wa8730a001g003580	1.92613	1.36937e-144	1.90918e-140	0.952	0.301	AT3G62700 AT2G47800 AT1G71330	ABCC14, ATMRP10, MRP10 ABCC4, ATMRP4, EST3, MRP4 ATNAP5, NAP5	member of MRP subfamily Encodes a plasma membrane localized ATPase transporter involved in multidrug transport. The expression of this gene is upregulated by herbicide safeners such as benoxacor, fluxofenim and fenclorim. member of NAP subfamily
Wa8730a012g004550	1.9259	6.18579e-127	8.62422e-123	0.991	0.619	AT4G24380 AT5G65400		alpha/beta-Hydrolases superfamily protein
Wa8730a018g000750	1.91761	3.68918e-163	5.14346e-159	0.789	0.119	AT3G55120	A11, AtCHI, CFI, CHI, TT5	Catalyzes the conversion of chalcones into flavanones. Required for the accumulation of purple anthocyanins in leaves and stems.
Wa8730a010g004440	1.91523	7.47751e-48	1.04251e-43	0.364	0.086
Wa8730a012g004670	1.90963	1.38956e-122	1.93732e-118	0.699	0.133	AT4G39980 AT4G33510 AT1G22410	DHS1 DHS2	Encodes a 2-deoxy-D-arabino-heptulosonate 7-phosphate (DAHP) synthase, which catalyzes the first committed step in aromatic amino acid biosynthesis. Gene expression is induced by wounding and pathogenic bacteria Pseudomonas syringae. Enzyme catalyzing the first committed step in aromatic amino acid biosynthesis Class-II DAHP synthetase family protein
Wa8730a019g000710	1.89358	7.29595e-116	1.0172e-111	0.858	0.27	AT3G55150 AT2G39380 AT3G09520 AT1G07725 AT5G59730 AT2G28650	ATEXO70H1, EXO70H1 ATEXO70H2, EXO70H2 ATEXO70H4, EXO70H4 ATEXO70H6, EXO70H6 ATEXO70H7, EXO70H7 ATEXO70H8, EXO70H8	A member of EXO70 gene family, putative exocyst subunits, conserved in land plants. Arabidopsis thaliana contains 23 putative EXO70 genes, which can be classified into eight clusters on the phylogenetic tree. A member of EXO70 gene family, putative exocyst subunits, conserved in land plants. Arabidopsis thaliana contains 23 putative EXO70 genes, which can be classified into eight clusters on the …
Wa8730a001g009230	1.87137	6.6829e-105	9.3173e-101	0.497	0.069	AT1G50520 AT4G12330 AT5G48000 AT1G13090	CYP705A27 CYP706A7 CYP708, CYP708A2, THAH, THAH1 CYP71B28	member of CYP705A member of CYP706A Encodes a member of the CYP708A family of cytochrome P450 enzymes. THAH appears to add a hydroxyl group to the triterpene thalianol. thah1 mutants have an elevated accumulation of thalianol. thah1-1 mutants have longer roots than wild type plants. Thalian-diol and desaturated thalian-diol are lost from the root extracts of thah1-1 mutants. Overexpression of the…
Wa8730a013g001880	1.85787	2.14154e-153	2.98574e-149	0.786	0.128	AT1G07240	UGT71C5	Encodes a UDP-glucosyltransferase that plays a role in abscisic acid (ABA) glucosylation from ABA to ABA-glucose ester and regulates ABA homeostasis, thereby influencing the ABA signal network.
Wa8730a017g001990	1.85666	2.3971e-149	3.34203e-145	0.922	0.226
Wa8730a019g001620	1.84655	3.77163e-210	5.2584e-206	0.91	0.116	AT3G66658 AT1G44170	ALDH22A1 ALDH3H1, ALDH4	Encodes a putative aldehyde dehydrogenase. The gene is not responsive to osmotic stress and is expressed constitutively at a low level in plantlets and root cultures. Encodes a protein similar to the aldehyde dehydrogenase cp-ADH from C.plantagineum. Constitutively expressed at low levels.
Wa8730a009g001620	1.84286	2.49019e-97	3.47182e-93	0.482	0.069	AT5G05270	AtCHIL, CHIL	Chalcone-flavanone isomerase family protein
Wa8730a004g002220	1.82848	1.99453e-152	2.78078e-148	0.717	0.099	AT5G55620 AT5G41761
Wa8730a017g002740	1.82607	2.73757e-172	3.81672e-168	0.907	0.187	AT2G16530 AT1G72590		Encodes polyprenol reductase involved in N-gylcosylation. Mutants are defective in pollen development. Knockouts are embryo lethal Encodes a polyphenol reductase.
Wa8730a006g005060	1.79051	7.65543e-152	1.06732e-147	0.955	0.231	AT5G15290 AT1G14160	CASP5	Uncharacterised protein family (UPF0497) Uncharacterised protein family (UPF0497)
Wa8730a013g005120	1.78972	2.10951e-191	2.94108e-187	0.837	0.117
Wa8730a009g001590	1.76365	2.29255e-95	3.19627e-91	0.961	0.57	AT3G55500 AT5G05290 AT5G39280 AT2G37640 AT2G28950 AT2G40610 AT5G02260	ATEXP16, ATEXPA16, ATHEXP, EXP16, EXPA16 ATEXP2, ATEXPA2, ATHEXP, EXP2, EXPA2 ATEXP23, ATEXPA23, ATHEXP, EXPA23 ATEXP3, ATEXPA3, ATHEXP, EXP3 ATEXP6, ATEXPA6, ATHEXP, EXPA6 ATEXP8, ATEXPA8, ATHEXP, EXP8, EXPA8 ATEXP9, ATEXPA9, ATHEXP, EXP9, EXPA9	expansin-like protein. Naming convention from the Expansin Working Group (Kende et al, 2004. Plant Mol Bio). Involved in the formation of nematode-induced syncytia in roots of Arabidopsis thaliana. Encodes an expansin. Naming convention from the Expansin Working Group (Kende et al, 2004. Plant Mol Bio) member of Alpha-Expansin Gene Family. Naming convention from the Expansin Working Group (Kende …
Wa8730a016g001110	1.76324	1.79699e-138	2.50536e-134	0.931	0.262	AT1G36160	ACC1, AT-ACC1, EMB22, GK, GSD1, PAS3, SFR3	Encodes acetyl-CoA carboxylase. Mutant displays uncoordinated cell divisions which are enhanced by cytokinins. Mutant also has aberrant organization of the apical region in the embryo and abnormal root and shoot development. Essential for very long chain fatty acid elongation.
Wa8730a001g011890	1.76274	1.64184e-116	2.28905e-112	0.961	0.414	AT5G59530 AT2G44800 AT5G43450		2-oxoglutarate (2OG) and Fe(II)-dependent oxygenase superfamily protein 2-oxoglutarate (2OG) and Fe(II)-dependent oxygenase superfamily protein encodes a protein whose sequence is similar to ACC oxidase
Wa8730a011g005590	1.75945	8.09408e-101	1.12848e-96	0.904	0.383	AT5G57800	CER3, FLP1, WAX2, YRE	encodes a transmembrane protein with similarity to the sterol desaturase family at the N-terminus and to the short-chain dehydrogenase/reductase family at the C-terminus. Mutant analyses indicate this protein is involved in cuticle membrane and wax biosynthesis.
Wa8730a001g011170	1.74597	1.20649e-160	1.68209e-156	0.955	0.224	AT5G02540 AT2G37540 AT4G11410		NAD(P)-binding Rossmann-fold superfamily protein NAD(P)-binding Rossmann-fold superfamily protein NAD(P)-binding Rossmann-fold superfamily protein
Wa8730a007g002140	1.73513	3.15062e-68	4.3926e-64	0.404	0.076	AT5G48500
Wa8730a015g005880	1.71949	2.6186e-120	3.65085e-116	0.877	0.257	AT2G24150	HHP3	heptahelical transmembrane protein HHP3
Wa8730a002g009950	1.7185	2.31089e-226	3.22184e-222	0.852	0.084	AT2G28630 AT5G04530	KCS12 KCS19	Encodes KCS12, a member of the 3-ketoacyl-CoA synthase family involved in the biosynthesis of VLCFA (very long chain fatty acids). Encodes KCS19, a member of the 3-ketoacyl-CoA synthase family involved in the biosynthesis of VLCFA (very long chain fatty acids).
Wa8730a008g003780	1.71468	3.07975e-114	4.29379e-110	0.964	0.425	AT4G19690 AT3G12750 AT2G30080 AT1G31260 AT2G32270 AT1G05300 AT2G04032	ATIRT1, IRT1 AtZIP1, ZIP1 ATZIP6, ZIP6 ZIP10 ZIP3 ZIP5 ZIP7	Fe(II) transport protein (IRT1) A member of Zrt- and Irt-related protein (ZIP) family. transcript is induced in response to zinc deficiency in the root. member of Fe(II) transporter isolog family. Gene expression is not regulated by iron, copper, or zinc deficiency or excess. member of Fe(II) transporter isolog family A member of Zrt- and Irt-related protein (ZIP) family. transcript is induced in…
Wa8730a008g003430	1.70674	1.13163e-121	1.57772e-117	0.756	0.148
Wa8730a019g000700	1.70655	1.18054e-53	1.64591e-49	0.34	0.065	AT5G59820 AT2G37430 AT2G28710 AT1G02030 AT5G03510 AT3G46070 AT3G53600	AtZAT12, RHL41, ZAT12 ZAT11	Encodes a zinc finger protein involved in high light and cold acclimation. Overexpression of this putative transcription factor increases the expression level of 9 cold-responsive genes and represses the expression level of 15 cold-responsive genes, including CBF genes. Also, lines overexpressing this gene exhibits a small but reproducible increase in freeze tolerance. Because of the repression o…
Wa8730a015g001790	1.70539	1.63953e-50	2.28584e-46	0.934	0.649	AT1G80920	AtJ8, AtToc12, DJC22, J8, Toc12	A nuclear encoded soluble protein found in the chloroplast stroma.
Wa8730a009g001850	1.7035	5.12262e-96	7.14196e-92	0.877	0.363	AT5G62920 AT1G19050 AT2G41310 AT3G57040	ARR6 ARR7 ARR8, ATRR3, RR3 ARR9, ATRR4	Encodes a Type-A response regulator that is responsive to cytokinin treatment. Its C-ter domain is very short in comparison to other Arabidopsis ARRs (17 total). Arr6 protein is stabilized by cytokinin. Encodes a member of the Arabidopsis response regulator (ARR) family, most closely related to ARR15. A two-component response regulator protein containing a phosphate accepting domain in the receiv…
Wa8730a019g001460	1.70183	1.6217e-121	2.26097e-117	0.994	0.631	AT2G30490 AT2G40890	ATC4H, C4H, CYP73A5, REF3 CYP98A3	Encodes a cinnamate-4-hydroxylase. Mutations in this gene impact phenylpropanoid metabolism, growth and development. encodes coumarate 3-hydroxylase (C3H), a P450-dependent monooxygenase. Involved in lignin biosynthesis and flavonoid biosynthesis. Also affects the biosynthesis of coumarins such as scopoletin and scopolin as a branching-out-pathway from the phenylpropanoid acid level.
Wa8730a003g000920	1.69253	2.23032e-147	3.10951e-143	0.883	0.203
Wa8730a012g001710	1.68901	8.1498e-170	1.13624e-165	0.762	0.102	AT5G63790	ANAC102, NAC102	Encodes a member of the NAC family of transcription factors. ANAC102 appears to have a role in mediating response to low oxygen stress (hypoxia) in germinating seedlings.
Wa8730a014g005700	1.66728	2.03725e-46	2.84034e-42	0.867	0.56	AT4G36040 AT2G17880	DJC23, J11 DJC24	Chaperone DnaJ-domain superfamily protein Chaperone DnaJ-domain superfamily protein
Wa8730a005g000060	1.66118	7.7748e-124	1.08396e-119	0.961	0.362	AT2G25490 AT5G25350	EBF1, FBL6 EBF2	Encodes an F-box protein involved in the ubiquitin/proteasome-dependent proteolysis of EIN3. Arabidopsis thaliana EIN3-binding F-box protein 2 (EBF2) mRNA. Part of the SCF complex, it is located in the nucleus and is involved in the ethylene-response pathway.
Wa8730a006g002600	1.66075	4.67023e-209	6.51123e-205	0.663	0.043	AT1G79460	ATKS, ATKS1, GA2, KS, KS1	Encodes for a protein with ent-kaurene synthase B activity which catalyzes the second step in the cyclization of GGPP to ent-kaurene in the gibberellins biosynthetic pathway.
Wa8730a007g003940	1.65663	7.04696e-98	9.82487e-94	0.458	0.059	AT5G13930	ATCHS, CHS, TT4	Encodes chalcone synthase (CHS), a key enzyme involved in the biosynthesis of flavonoids. Required for the accumulation of purple anthocyanins in leaves and stems. Also involved in the regulation of auxin transport and the modulation of root gravitropism.
Wa8730a002g007630	1.64952	3.35565e-115	4.67845e-111	0.955	0.426	AT5G38630	ACYB-1, CYB-1	Encodes for cytochrome b561.
Wa8730a020g003070	1.64885	8.27294e-91	1.15341e-86	0.714	0.2	AT3G26690 AT1G12880	ATNUDT13, ATNUDX13, NUDX13 NUDT12, atnudt12	Encodes AtNUDT13, a mitochondrial Nudix hydrolase specific for long-chain diadenosine polyphosphates. nudix hydrolase homolog 12
Wa8730a017g004030	1.64518	5.29728e-106	7.38546e-102	0.997	0.801
Wa8730a007g003870	1.63568	5.52227e-182	7.69915e-178	0.669	0.062	AT5G13400		Major facilitator superfamily protein
Wa8730a009g003340	1.63173	8.43641e-133	1.1762e-128	0.873	0.223	AT3G54180 AT2G38620 AT1G09600	CDC2B, CDKB1 1 CDKB1 2	Arabidopsis homolog of yeast cdc2, a protein kinase (cyclin-dependent kinase) that plays a central role in control of the mitotic cell cycle. Encodes a member of a plant specific family of cyclin dependent kinases. Protein kinase superfamily protein
Wa8730a001g004950	1.62563	8.24517e-130	1.14954e-125	0.952	0.274
Wa8730a006g004490	1.61651	3.2593e-146	4.54412e-142	0.928	0.245	AT1G24470	ATKCR2, KCR2	Encodes one of the two Arabidopsis homologues to YBR159w encoding a S. cerevisiae beta-ketoacyl reductase (KCR), which catalyzes the first reduction during VLCFA (very long chain fatty acids, >18 carbon) elongation: KCR1 (At1g67730), KCR2 (At1g24470). Complementation of the yeast ybr159Delta mutant demonstrated that the two KCR proteins are divergent and that only AtKCR1 can restore heterologous …
Wa8730a008g000260	1.59167	6.91039e-137	9.63446e-133	0.584	0.07	AT3G63240		DNAse I-like superfamily protein
Wa8730a007g003310	1.57837	3.43601e-86	4.79049e-82	0.63	0.157	AT1G74110	CYP78A10	member of CYP78A
Wa8730a001g003240	1.56532	8.58993e-157	1.19761e-152	0.702	0.096	AT1G23330		alpha/beta-Hydrolases superfamily protein
Wa8730a011g004700	1.55938	3.62577e-67	5.05505e-63	0.235	0.018	AT5G57800	CER3, FLP1, WAX2, YRE	encodes a transmembrane protein with similarity to the sterol desaturase family at the N-terminus and to the short-chain dehydrogenase/reductase family at the C-terminus. Mutant analyses indicate this protein is involved in cuticle membrane and wax biosynthesis.
Wa8730a008g000650	1.54865	5.46511e-93	7.61945e-89	0.985	0.606
Wa8730a014g004410	1.54532	3.14881e-69	4.39007e-65	0.892	0.441
Wa8730a005g001370	1.53923	2.06275e-140	2.87588e-136	0.741	0.133	AT2G28305 AT5G26140 AT2G37210 AT3G53450 AT5G03270 AT5G11950	ATLOG1, LOG1 ATLOG9, LOG9 LOG3 LOG4 LOG6 LOG8	Putative lysine decarboxylase family protein Putative lysine decarboxylase family protein Encodes a protein of unknown function. It has been crystallized and shown to be structurally almost identical to the protein encoded by At5g11950. Putative lysine decarboxylase family protein lysine decarboxylase family protein Encodes a protein of unknown function. It has been crystallized and shown to be s…
Wa8730a011g001670	1.53417	7.94056e-153	1.10707e-148	0.777	0.124	AT1G32450 AT5G19640 AT1G22540	AtNPF7.3, NPF7.3, NRT1.5	Transmembrane nitrate transporter. Involved in xylem transport of nitrate from root to shoot. Induced in response to nitrate. Not involved in nitrate uptake. expressed in root pericycle cells. Major facilitator superfamily protein Major facilitator superfamily protein
Wa8730a003g002080	1.53145	3.50631e-78	4.88849e-74	0.97	0.53	AT5G67450 AT3G19580 AT5G43170 AT1G27730 AT3G49930 AT1G49900	AZF1, ZF1 AZF2, ZF2 AZF3, ZF3 STZ, ZAT10	Encodes zinc-finger protein. mRNA levels are elevated in response to low temperature, cold temperatures and high salt. The protein is localized to the nucleus and acts as a transcriptional repressor. Encodes zinc finger protein. mRNA levels are upregulated in response to ABA, high salt, and mild dessication. The protein is localized to the nucleus and acts as a transcriptional repressor. Encodes …
Wa8730a004g004850	1.52817	9.00532e-108	1.25552e-103	0.949	0.401	AT3G21690 AT1G61890 AT4G21910 AT1G11670		MATE efflux family protein MATE efflux family protein MATE efflux family protein MATE efflux family protein
Wa8730a015g004500	1.51781	2.70288e-133	3.76836e-129	0.81	0.18	AT1G60010 AT1G10530
Wa8730a004g005080	1.51737	4.07349e-81	5.67926e-77	0.786	0.254	AT4G05070		Wound-responsive family protein
Wa8730a018g003530	1.51519	4.69511e-127	6.54592e-123	0.934	0.281	AT1G60810 AT1G09430	ACLA-2 ACLA-3	One of the three genes encoding subunit A of the trimeric enzyme ATP Citrate lyase Encodes subunit A of the heteromeric enzyme ATP citrate lyase (ACL). In animals, ACL is encoded by a single gene ACL in Arabidopsis is composed of two polypeptides, ACLA (encoded by 3 genes) and ACLB (encoded by 2 genes). The holoenzyme has an A(4)B(4)stoichiometry. Expression of both ACLA and ACLB but not of eithe…
Wa8730a013g001050	1.51485	1.30357e-223	1.81744e-219	0.705	0.045	AT1G01580 AT5G23990	ATFRO2, FRD1, FRO2 ATFRO5, FRO5	Encodes the low-iron-inducible ferric chelate reductase responsible for reduction of iron at the root surface. It is likely to be the major Fe(III) chelate reductase in Arabidopsis iron metabolism. Coordinately regulated with IRT1, the major transporter responsible for high-affinity iron uptake from the soil, at both transcriptional and posttranscriptional levels. Steady state mRNA levels are reg…
Wa8730a011g004850	1.51239	1.33434e-211	1.86034e-207	0.783	0.071
Wa8730a019g001030	1.50679	1.45661e-96	2.03081e-92	0.952	0.434	AT3G55980 AT2G40140 AT5G07500 AT5G58620	ATSZF1, SZF1 ATSZF2, CZF1, SZF2, ZFAR1 AtTZF6, PEI1, TZF6 TZF9	salt-inducible zinc finger 1 zinc finger (CCCH-type) family protein Encodes an embryo-specific zinc finger transcription factor required for heart-stage embryo formation. zinc finger (CCCH-type) family protein
Wa8730a009g005630	1.50378	1.00305e-93	1.39846e-89	0.988	0.679
Wa8730a005g000640	1.49564	8.94181e-141	1.24667e-136	0.861	0.197
Wa8730a005g003460	1.49012	4.31042e-138	6.00959e-134	0.56	0.058	AT5G25610	ATRD22, RD22	responsive to dehydration 22 (RD22) mediated by ABA
Wa8730a003g003400	1.48758	4.07549e-181	5.68205e-177	0.735	0.078	AT4G16442		Uncharacterised protein family (UPF0497)
Wa8730a015g004640	1.48713	8.84197e-87	1.23275e-82	0.828	0.282	AT3G48180 AT1G24405
Wa8730a003g005690	1.48622	2.65279e-97	3.69853e-93	0.87	0.312	AT3G19320 AT1G49750 AT4G06744 AT1G25320		Leucine-rich repeat (LRR) family protein Leucine-rich repeat (LRR) family protein Leucine-rich repeat (LRR) family protein Leucine-rich repeat protein kinase family protein
Wa8730a001g006630	1.48544	3.70521e-46	5.1658e-42	0.41	0.108
Wa8730a008g000170	1.48476	1.4743e-92	2.05546e-88	0.434	0.056
Wa8730a015g004980	1.46825	1.04143e-107	1.45196e-103	0.949	0.401	AT4G34135 AT2G15490 AT1G24100 AT2G23250	UGT73B2 UGT73B4 UGT74B1 UGT84B2	The At4g34135 gene encodes a flavonol 7-O-glucosyltransferase (EC 2.4.1.237) that glucosylates also with a 20 fold lower activity flavonols (kaempferol and quercetin) at the 3-O-position. UDP-glycosyltransferase 73B4 Encodes a UDP-glucose:thiohydroximate S-glucosyltransferase, involved in glucosinolate biosynthesis UDP-glucosyl transferase 84B2
Wa8730a010g004870	1.46554	5.86981e-141	8.18368e-137	0.732	0.12	AT5G48230	AACT2, ACAT2, EMB1276	Encodes an acetoacetyl-CoA thiolase that generates the bulk of the acetoacetyl-CoA precursor needed for the cytosolic localized, mevalonate-derived isoprenoids biosynthetic pathway. Loss-of-function mutants are embryo lethal.
Wa8730a011g000310	1.46452	2.38701e-144	3.32797e-140	0.852	0.183	AT2G35740 AT3G03090 AT5G17010	ATINT3, INT3 AtVGT1, VGT1	nositol transporter 3 Encodes a vacuolar membrane-localized glucose transporter that can also transport fructose. Mutations in these gene have effects on seed germination and time to flowering. Major facilitator superfamily protein
Wa8730a001g008130	1.46123	1.42777e-63	1.9906e-59	0.84	0.389	AT5G11070
Wa8730a016g001400	1.44082	6.03891e-148	8.41945e-144	0.792	0.139
Wa8730a016g002030	1.43708	5.79086e-115	8.07362e-111	0.946	0.334
Wa8730a020g002780	1.43025	2.70114e-202	3.76592e-198	0.795	0.082	AT1G67730 AT1G24470	ATKCR1, KCR1, YBR159 ATKCR2, KCR2	Encodes one of the two Arabidopsis homologues to YBR159w encoding a S. cerevisiae beta-ketoacyl reductase (KCR), which catalyzes the first reduction during VLCFA (very long chain fatty acids, >18 carbon) elongation: KCR1 (At1g67730), KCR2 (At1g24470). Complementation of the yeast ybr159Delta mutant demonstrated that the two KCR proteins are divergent and that only AtKCR1 can restore heterologous …
Wa8730a012g005240	1.42315	2.75724e-165	3.84414e-161	0.669	0.071	AT3G28910 AT1G74650 AT4G12350 AT1G08810 AT3G47600	ATMYB30, MYB30 ATMYB31, ATY13, MYB31 AtMYB42, MYB42 AtMYB60, MYB60 ATMYB94, ATMYBCP70, MYB94	transcription factor myb homologue Member of the R2R3 factor gene family. Encodes a putative transcription factor (MYB42). putative transcription factor of the R2R3-MYB gene family. Transcript increases under conditions that promote stomatal opening (white and blue light, abi1-1 mutation) and decreases under conditions that trigger stomatal closure (ABA, desiccation, darkness), with the exception…
Wa8730a001g002830	1.41768	1.61642e-75	2.25362e-71	0.807	0.279	AT1G09070 AT1G12810	(ATSRC2, AtSRC2, SRC2	SRC2 specifically binds the peptide PIEPPPHH, and moves from ER to a vacuole fraction where it gets internalized. Involved in Protein Storage Vacuole targeting. proline-rich family protein
Wa8730a006g004420	1.41768	2.15938e-101	3.01061e-97	0.648	0.135	AT2G43590		Chitinase family protein
Wa8730a004g005870	1.41032	5.84185e-101	8.1447e-97	0.756	0.192	AT1G68670 AT4G37180 AT1G25550		HHO2 is a HRS1 homolog. Induced in roots by low Pi and is likely involved in maintaining phosphate homeostasis. It is target of PHR1. myb family transcription factor, contains Pfam domain, PF00249: Myb-like DNA-binding domain l also isolated as a putative cytoskeletal protein in a yeast screen myb-like transcription factor family protein
Wa8730a007g004260	1.40514	1.62313e-117	2.26297e-113	0.608	0.088	AT4G08910 AT1G22250 AT1G78170
Wa8730a013g004710	1.39702	1.06464e-114	1.48431e-110	0.877	0.261	AT5G43360 AT2G32830 AT3G54700	ATPT4, PHT1 3, PHT3 PHT1 5, PHT5 PHT1 7	Encodes Pht1 3, a member of the Pht1 family of phosphate transporters which include: Pht1 1/At5g43350, Pht1 2/At5g43370, Pht1 3/At5g43360, Pht1 4/At2g38940, Pht1 5/At2g32830, Pht1 6/At5g43340, Pht1 7/At3g54700, Pht1 8/At1g20860, Pht1 9/At1g76430 (Plant Journal 2002, 31:341). Encodes Pht1 5, a member of the Pht1 family of phosphate transporters which include: Pht1 1/At5g43350, Pht1 2/At5g43370, Ph…
Wa8730a001g012110	1.39649	2.05494e-149	2.86499e-145	0.521	0.039	AT3G54040		PAR1 protein
Wa8730a006g004320	1.39639	4.60065e-100	6.41423e-96	0.892	0.32	AT2G41480 AT5G64120 AT1G14540 AT5G66390 AT2G34060 AT5G15180 AT5G39580 AT3G03670 AT1G49570	AtPRX25, PRX25 AtPRX71, PRX71 PER4 PRX72	Encodes a cationic cell-wall-bound peroxidase homolog that is involved in the lignification of cell walls. encodes a cell wall bound peroxidase that is induced by hypo-osmolarity Peroxidase superfamily protein Encodes a peroxidase that is involved in lignin biosynthesis. Peroxidase superfamily protein Peroxidase superfamily protein Peroxidase superfamily protein Peroxidase superfamily protein Per…
Wa8730a004g003130	1.39638	6.99722e-110	9.75552e-106	0.892	0.266	AT3G24540	AtPERK3, PERK3	Encodes a member of the proline-rich extensin-like receptor kinase (PERK) family. This family consists of 15 predicted receptor kinases (PMID: 15653807).
Wa8730a005g004530	1.39486	2.362e-197	3.2931e-193	0.684	0.058	AT5G42030	ABIL4	ABL interactor-like protein 4
Wa8730a011g004580	1.39225	4.82605e-119	6.72848e-115	0.328	0.013	AT5G57800	CER3, FLP1, WAX2, YRE	encodes a transmembrane protein with similarity to the sterol desaturase family at the N-terminus and to the short-chain dehydrogenase/reductase family at the C-terminus. Mutant analyses indicate this protein is involved in cuticle membrane and wax biosynthesis.
Wa8730a014g005310	1.38944	1.00892e-75	1.40663e-71	0.729	0.227	AT5G24530 AT4G16770 AT4G10490 AT4G25310	DMR6	Encodes a putative 2OG-Fe(II) oxygenase that is defense-associated but required for susceptibility to downy mildew. 2-oxoglutarate (2OG) and Fe(II)-dependent oxygenase superfamily protein 2-oxoglutarate (2OG) and Fe(II)-dependent oxygenase superfamily protein 2-oxoglutarate (2OG) and Fe(II)-dependent oxygenase superfamily protein
Wa8730a011g000990	1.38768	4.08555e-95	5.69607e-91	0.777	0.22	AT4G18780 AT5G16910 AT3G03050 AT1G32180	ATCESA8, CESA8, IRX1, LEW2 ATCSLD2, CSLD2 ATCSLD3, CSLD3, KJK, RHD7 ATCSLD6, CSLD6	Encodes a member of the cellulose synthase family involved in secondary cell wall biosynthesis. Mutants have abnormal xylem formation, reduced cellulose content, and enhanced drought and osmotic stress tolerance. Mediates resistance towards bacterial pathogens via ABA. Confers resistance towards bacterial and fungal pathogens, independent of salicylic acid, ethylene and jasmonate signaling. encod…
Wa8730a007g006660	1.3825	1.41443e-116	1.972e-112	0.771	0.177	AT1G21680		DPP6 N-terminal domain-like protein
Wa8730a009g001630	1.37624	1.34473e-92	1.87482e-88	0.825	0.268	AT3G21090 AT2G29940 AT5G13580	ABCG15 ABCG31, ATPDR3, PDR3 ABCG6	ABC-2 type transporter family protein pleiotropic drug resistance 3 Belongs to a clade of five Arabidopsis thaliana ABCG half-transporters that are required for synthesis of an effective suberin barrier in roots and seed coats (ABCG2, ABCG6, and ABCG20) and for synthesis of an intact pollen wall (ABCG1 and ABCG16).
Wa8730a014g005520	1.3675	4.51821e-109	6.29928e-105	0.919	0.302	AT2G17730 AT4G35840 AT5G66070	NIP2	Intrinsic thylakoid membrane protein that fixes RPOTmp on the stromal side of the thylakoid membrane. RING/U-box superfamily protein RING/U-box superfamily protein
Wa8730a019g001830	1.35357	7.57138e-51	1.0556e-46	0.922	0.549	AT1G01720 AT1G52890 AT4G27410	ANAC002, ATAF1 ANAC019, NAC019 ANAC072, RD26	Belongs to a large family of putative transcriptional activators with NAC domain. Transcript level increases in response to wounding and abscisic acid. ATAF1 attentuates ABA signaling and sythesis. Mutants are hyposensitive to ABA. encodes a NAC transcription factor whose expression is induced by drought, high salt, and abscisic acid. This gene binds to ERD1 promoter in vitro. Encodes a NAC trans…
Wa8730a008g002540	1.33561	4.66832e-178	6.50857e-174	0.813	0.108	AT5G10480	PAS2, PEP	Protein tyrosine phosphatase-like involved in cell division and differentiation. Interacts with CDKA 1 only in its phosphorylated form, preventing dephosphorylation. Overexpression slowed down cell division in suspension cell cultures at the G2-to-M transition and early mitosis and inhibited Arabidopsis seedling growth. Localized in the cytoplasm of dividing cells but moved into the nucleus upon …
Wa8730a006g002290	1.33503	4.21357e-104	5.87456e-100	0.783	0.214	AT5G53560 AT5G48810	ATB5-A, ATCB5-E, B5, CB5-E ATB5-B, ATCB5-D, B5, CB5-D, CYTB5-B	Encodes a cytochrome b5 isoform that can be reduced by AtCBR, a cytochrome b5 reductase. Encodes a cytochrome b5 isoform that localizes to the ER. The C-terminal portion of the protein appears to be capable of inserting into a plant microsomal membrane in vitro and the protein appears to be subject to glycosylation.
Wa8730a015g003690	1.33491	1.41742e-169	1.97616e-165	0.813	0.109	AT3G07680	p24beta2	Encodes an Golgi-localized p24 protein. Interacts with p24delta5 at ER export sites for ER exit and coupled transport to the Golgi apparatus. The mRNA is cell-to-cell mobile.
Wa8730a004g008480	1.32713	1.33405e-45	1.85993e-41	0.786	0.388	AT3G24500	ATMBF1C, MBF1C	One of three genes in A. thaliana encoding multiprotein bridging factor 1, a highly conserved transcriptional coactivator. May serve as a bridging factor between a bZIP factor and TBP. Its expression is specifically elevated in response to pathogen infection, salinity, drought, heat, hydrogen peroxide, and application of abscisic acid or salicylic acid. Constitutive expression enhances the tolera…
Wa8730a009g002200	1.32442	5.58128e-172	7.78142e-168	0.792	0.1	AT3G05020 AT5G27200	ACP, ACP1 ACP5	encodes an acyl carrier protein expressed in leaves, roots, and dry seeds. Protein is not regulated by light. encodes an acyl carrier protein
Wa8730a007g000670	1.3244	4.56868e-114	6.36965e-110	0.771	0.172	AT1G21326		VQ motif-containing protein
Wa8730a010g004190	1.32379	6.85981e-114	9.56395e-110	0.467	0.048	AT1G67980 AT4G26220	CCOAMT CCoAOMT7	Encodes S-adenosyl-L-methionine: transcaffeoyl Coenzyme A 3-O-methyltransferase. Encodes a caffeoyl-coenzyme A O-methyltransferase (CCoAOMT)-like protein with a strong preference for methylating the para position of flavanones and dihydroflavonols, whereas flavones and flavonols are methylated in the meta-position.
Wa8730a015g006100	1.31642	5.52735e-112	7.70623e-108	0.47	0.052	AT5G42380 AT3G01830	CML37	calmodulin like 37 Calcium-binding EF-hand family protein
Wa8730a015g002730	1.29937	4.58175e-113	6.38788e-109	0.867	0.243	AT2G42280	AKS3, FBH4	basic helix-loop-helix (bHLH) DNA-binding superfamily protein
Wa8730a010g004880	1.29447	2.91208e-98	4.06002e-94	0.97	0.454	AT5G55850 AT5G63270 AT5G40645	NOI	NOI protein RPM1-interacting protein 4 (RIN4) family protein RPM1-interacting protein 4 (RIN4) family protein
Wa8730a009g000590	1.29308	1.21232e-106	1.69022e-102	0.928	0.329	AT2G38050 AT3G55360	ATDET2, DET2, DWF6 ATTSC13, CER10, ECR, TSC13	Similar to mammalian steroid-5-alpha-reductase. Involved in the brassinolide biosynthetic pathway. Enoyl-CoA reductase is involved in all very long chain fatty acids (VLCFA) elongation reactions that are required for cuticular wax, storage lipid and sphingolipid metabolism. The protein is located in the ER, but in contrast to its yeast homolog TSC13 is not particularly enriched in the nuclear env…
Wa8730a017g002260	1.29048	1.59096e-68	2.21811e-64	0.319	0.04
Wa8730a001g012130	1.28778	1.68158e-64	2.34445e-60	0.732	0.255	AT3G54040		PAR1 protein
Wa8730a010g003440	1.28721	2.01367e-62	2.80746e-58	0.753	0.278	AT3G49940 AT1G67100 AT3G02550 AT1G68510	LBD38 LBD40 LBD41 LBD42	LOB domain-containing protein 38 LOB domain-containing protein 40 LOB domain-containing protein 41 LOB domain-containing protein 42
Wa8730a003g006850	1.28403	8.75331e-58	1.22039e-53	0.482	0.12	AT1G74410		RING/U-box superfamily protein
Wa8730a005g000930	1.28312	1.65514e-45	2.30759e-41	0.834	0.46	AT1G15670 AT1G80440 AT2G21950	KFB01, KMD2 KFB20, KMD1 SKIP6	Encodes a member of a family of F-box proteins, called the KISS ME DEADLY (KMD) family, that targets type-B ARR proteins for degradation and is involved in the negative regulation of the cytokinin response. Also named as KFB1, a member of a group of Kelch repeat F-box proteins that negatively regulate phenylpropanoid biosynthesis by targeting the phenypropanoid biosynthesis enzyme phenylalanine a…
Wa8730a009g004010	1.2822	1.01365e-75	1.41323e-71	0.798	0.288	AT2G47260 AT5G49520 AT3G62340 AT5G13080	ATWRKY23, WRKY23 ATWRKY48, WRKY48 AtWRKY68, WRKY68 ATWRKY75, WRKY75	Encodes a member of WRKY Transcription Factor Group I. Involved in nematode feeding site establishment. Encodes WRKY48, a member of the WRKY Transcription Factor. WRKY48 is a stress- and pathogen-induced transcriptional activator that represses plant basal defense. member of WRKY Transcription Factor Group II-c WRKY75 is one of several transcription factors induced during Pi deprivation. It is nu…
Wa8730a016g000410	1.28216	6.20717e-161	8.65404e-157	0.599	0.051
Wa8730a001g000970	1.27978	5.1804e-129	7.22251e-125	0.651	0.102	AT3G06650 AT5G49460	ACLB-1 ACLB-2	One of the two genes encoding subunit B of the trimeric enzyme ATP Citrate lyase One of the two genes encoding subunit B of the cytosolic enzyme ATP Citrate Lyase (ACL)
Wa8730a013g002960	1.27116	9.6391e-94	1.34388e-89	0.458	0.066
Wa8730a004g002960	1.26994	9.54964e-66	1.33141e-61	0.62	0.184	AT4G29780 AT5G12010
Wa8730a010g005580	1.26639	1.72689e-70	2.40763e-66	0.696	0.22
Wa8730a012g000570	1.26595	2.76164e-96	3.85028e-92	0.681	0.157	AT1G43630		Protein of unknown function (DUF793)
Wa8730a009g004750	1.26398	2.12686e-123	2.96527e-119	0.828	0.193
Wa8730a008g004080	1.26016	2.49489e-115	3.47838e-111	0.828	0.217	AT1G11840	ATGLX1, GLX1	Encodes a glyoxalase I homolog ATGLX1.
Wa8730a017g002730	1.25534	3.4757e-77	4.84582e-73	0.961	0.686	AT1G75600 AT1G13370		Histone superfamily protein Histone superfamily protein
Wa8730a008g004660	1.25041	1.12908e-70	1.57416e-66	0.337	0.042
Wa8730a009g006930	1.24716	6.42858e-72	8.96273e-68	0.59	0.155	AT2G22860 AT3G49780 AT4G37720	ATPSK2, PSK2 ATPSK3, ATPSK4, PSK4 ATPSK6, PSK6	Phytosulfokine 2 precursor, coding for a unique plant peptide growth factor. Phytosulfokine 3 precursor, coding for a unique plant peptide growth factor. Plants overexpressing this gene (under a 35S promoter), develop normal cotyledons and hypocotyls but their growth, in particular that of their roots, was faster than that of wildtype. Probable phytosulfokines 6 precursor, coding for a unique pla…
Wa8730a008g004200	1.24031	2.96702e-121	4.13662e-117	0.446	0.037	AT3G20395 AT1G12760 AT1G63170		RING/U-box superfamily protein Zinc finger, C3HC4 type (RING finger) family protein Zinc finger, C3HC4 type (RING finger) family protein
Wa8730a013g003830	1.23761	4.98126e-47	6.94488e-43	0.675	0.272
Wa8730a016g001560	1.23713	1.66766e-52	2.32505e-48	0.705	0.267	AT1G35140 AT5G64260 AT5G09440 AT4G08950	EXL1, PHI-1 EXL2 EXL4 EXO	At1g35140 (At1g35140/T32G9_32) mRNA, complete cds EXORDIUM like 2 EXORDIUM like 4 Phosphate-responsive 1 family protein
Wa8730a002g010030	1.23518	4.36177e-81	6.08118e-77	0.955	0.513	AT3G07090		PPPDE putative thiol peptidase family protein
Wa8730a006g007440	1.22886	5.45534e-98	7.60584e-94	0.997	0.834	AT1G72360 AT1G53910 AT3G14230	AtERF73, ERF73, HRE1 RAP2.12 RAP2.2	encodes a member of the ERF (ethylene response factor) subfamily B-2 of ERF/AP2 transcription factor family. The protein contains one AP2 domain. There are 5 members in this subfamily including RAP2.2 AND RAP2.12. encodes a member of the ERF (ethylene response factor) subfamily B-2 of ERF/AP2 transcription factor family (RAP2.12). The protein contains one AP2 domain. There are 5 members in this s…
Wa8730a010g003840	1.2282	6.40506e-99	8.92994e-95	0.316	0.019
Wa8730a005g005630	1.22434	6.22836e-156	8.68359e-152	0.542	0.042	AT4G20430 AT5G45650		Subtilase family protein subtilase family protein
Wa8730a005g002930	1.21449	4.41167e-89	6.15076e-85	0.705	0.194	AT5G11650		alpha/beta-Hydrolases superfamily protein
Wa8730a011g005910	1.20928	1.50427e-30	2.09725e-26	0.566	0.256	AT5G57123 AT4G29905 AT5G10695
Wa8730a014g000630	1.20882	3.77013e-79	5.25631e-75	0.976	0.519
Wa8730a010g002100	1.20481	1.60482e-92	2.23743e-88	0.786	0.229	AT2G43050 AT5G53370 AT3G06830	ATPMEPCRD ATPMEPCRF, PMEPCRF	Plant invertase/pectin methylesterase inhibitor superfamily pectin methylesterase PCR fragment F Plant invertase/pectin methylesterase inhibitor superfamily
Wa8730a010g001140	1.20045	6.26221e-48	8.73078e-44	0.648	0.242	AT4G29190 AT2G25900 AT2G19810 AT1G03790 AT5G44260	AtC3H49, AtOZF2, AtTZF3, OZF2, TZF3 ATCTH, ATTZF1 AtOZF1, AtTZF2, OZF1, TZF2 AtTZF4, SOM, TZF4 AtTZF5, TZF5	Zinc finger C-x8-C-x5-C-x3-H type family protein putative Cys3His zinc finger protein (ATCTH) mRNA, complete Encodes Oxidation-related Zinc Finger 1 (OZF1), a plasma membrane protein involved in oxidative stress. Encodes SOMNUS (SOM), a nucleus-localized CCCH-type zinc finger protein. SOM negatively regulates light-dependent seed germination downstream of PIL5 (AT2G20180). Encodes a Tandem CCCH Z…
Wa8730a020g002800	1.19426	2.6648e-194	3.71527e-190	0.666	0.049	AT1G67730 AT1G24470 AT5G65205	ATKCR1, KCR1, YBR159 ATKCR2, KCR2	Encodes one of the two Arabidopsis homologues to YBR159w encoding a S. cerevisiae beta-ketoacyl reductase (KCR), which catalyzes the first reduction during VLCFA (very long chain fatty acids, >18 carbon) elongation: KCR1 (At1g67730), KCR2 (At1g24470). Complementation of the yeast ybr159Delta mutant demonstrated that the two KCR proteins are divergent and that only AtKCR1 can restore heterologous …
Wa8730a004g004930	1.19419	1.65057e-161	2.30122e-157	0.669	0.07	AT2G20835
Wa8730a020g001820	1.18497	3.98329e-81	5.5535e-77	0.961	0.621	AT1G22530	PATL2	PATELLIN 2
Wa8730a007g008940	1.18222	1.01865e-118	1.4202e-114	0.852	0.211
Wa8730a009g002910	1.1789	7.317e-116	1.02014e-111	0.533	0.069	AT1G19190		alpha/beta-Hydrolases superfamily protein
Wa8730a018g001290	1.17629	5.92696e-58	8.26337e-54	0.566	0.165	AT2G40340 AT2G38340 AT5G05410 AT3G11020 AT5G18450	AtERF48, DREB2C DREB19 DREB2, DREB2A DREB2, DREB2B	Encodes a member of the DREB subfamily A-2 of ERF/AP2 transcription factor family. The protein contains one AP2 domain. There are eight members in this subfamily including DREB2A AND DREB2B that are involved in response to drought. encodes a member of the DREB subfamily A-2 of ERF/AP2 transcription factor family. The protein contains one AP2 domain. There are eight members in this subfamily inclu…
Wa8730a001g010900	1.17159	3.9874e-85	5.55923e-81	0.873	0.322	AT5G16710	DHAR3	The protein undergoes thiolation following treatment with the oxidant tert-butylhydroperoxide.
Wa8730a001g006300	1.17115	1.67833e-112	2.33993e-108	0.735	0.159	AT5G01700		Protein phosphatase 2C family protein
Wa8730a001g004310	1.17073	5.93923e-74	8.28047e-70	0.792	0.289	AT5G04950 AT5G56080 AT1G09240 AT1G56430	ATNAS1, NAS1 ATNAS2, NAS2 ATNAS3, NAS3 ATNAS4, NAS4	Encodes a nicotianamide synthase. Encodes a protein with nicotianamine synthase activity. Its transcript levels rise in roots in response to zinc deficiency and rise in leaves in response to elevated levels of zinc. Encodes a nicotianamine synthase. Encodes a protein with nicotianamine synthase activity.
Wa8730a018g002470	1.16219	1.75219e-98	2.44291e-94	0.762	0.189	AT4G02330 AT5G27870 AT3G05620 AT5G49180 AT3G10720 AT1G02810 AT2G47550 AT5G04970 AT4G15980 AT3G06830	ATPMEPCRB, AtPME41, PME41	Encodes a pectin methylesterase that is sensitive to chilling stress and brassinosteroid regulation. Plant invertase/pectin methylesterase inhibitor superfamily Plant invertase/pectin methylesterase inhibitor superfamily Encodes a putative pectin methylesterase. The gene is preferentially expressed in floral buds. Plant invertase/pectin methylesterase inhibitor superfamily Plant invertase/pectin …
Wa8730a012g004190	1.16208	1.86357e-72	2.59819e-68	0.955	0.553	AT1G14870 AT1G68610 AT1G49030	AtPCR2, PCR2 PCR11	PCR2 encodes a membrane protein involved in zinc transport and detoxification. Target promoter of the male germline-specific transcription factor DUO1. PLAC8 family protein
Wa8730a010g003570	1.15954	5.08212e-76	7.08549e-72	0.807	0.311	AT1G13390 AT1G68490 AT3G02555
Wa8730a001g012500	1.15767	2.82922e-36	3.9445e-32	0.449	0.154	AT2G40000 AT3G55840	ATHSPRO2, HSPRO2	ortholog of sugar beet HS1 PRO-1 2 Hs1pro-1 protein
Wa8730a001g003970	1.15161	1.10353e-65	1.53854e-61	0.63	0.192	AT4G16120 AT3G20580 AT4G27110 AT3G16860 AT5G49270 AT5G26940	ATSEB1, COBL7, SEB1 COBL10 COBL11 COBL8 COBL9, DER9, MRH4, SHV2 DPD1	putative membrane-anchored cell wall protein COBRA-like protein 10 precursor COBRA-like protein 11 precursor COBRA-like protein 8 precursor Involved in successfully establishing tip growth in root hairs. Encodes a Mg2+-dependent DNA exonuclease that degrades organelle DNA during Arabidopsis pollen development.
Wa8730a003g002320	1.14852	1.87809e-100	2.61844e-96	0.813	0.228	AT4G37470	KAI2	HTL belonging to the alpha/beta fold hydrolase superfamily. Mutant and over-expression studies indicates its involvement in seedling de-etiolation process.
Wa8730a010g004620	1.1468	6.74496e-82	9.40382e-78	0.795	0.252	AT1G59640 AT5G62610 AT2G42300 AT1G10120	BPE, BPEp, BPEub, ZCW32	A basic helix-loop-helix encoding gene (BIGPETAL, BPE) involved in the control of petal size. BPE is expressed via two mRNAs derived from an alternative splicing event. The BPEub (AT1G59640.1)transcript is expressed ubiquitously, whereas the BPEp (AT1G59640.2) transcript is preferentially expressed in petals. Plants that lack the petal-expressed variant BPEp have larger petals as a result of incr…
Wa8730a008g000640	1.14229	5.04734e-162	7.03701e-158	0.714	0.081
Wa8730a003g006990	1.14069	2.29616e-170	3.2013e-166	0.744	0.088	AT1G68530 AT2G26250 AT1G04220 AT1G19440	CER6, CUT1, G2, KCS6, POP1 FDH, KCS10 KCS2 KCS4	Encodes KCS6, a member of the 3-ketoacyl-CoA synthase family involved in the biosynthesis of VLCFA (very long chain fatty acids). epidermis-specific, encodes KCS10, a putative 3-ketoacyl-CoA synthase. probably involved in the synthesis of long-chain lipids found in the cuticle. Encodes KCS2, a member of the 3-ketoacyl-CoA synthase family involved in the biosynthesis of VLCFA (very long chain fatt…
Wa8730a010g003830	1.1396	7.37851e-68	1.02871e-63	0.931	0.501
Wa8730a004g005840	1.13795	2.15798e-118	3.00865e-114	0.524	0.064	AT4G37540 AT1G67100 AT1G68510	LBD39 LBD40 LBD42	LOB domain-containing protein 39 LOB domain-containing protein 40 LOB domain-containing protein 42
Wa8730a002g002980	1.13152	3.17841e-139	4.43133e-135	0.581	0.063	AT4G12390 AT1G23205 AT3G47380 AT1G62770 AT4G25260 AT5G62360	PME1	pectin methylesterase inhibitor 1 Plant invertase/pectin methylesterase inhibitor superfamily protein Plant invertase/pectin methylesterase inhibitor superfamily protein Plant invertase/pectin methylesterase inhibitor superfamily protein Plant invertase/pectin methylesterase inhibitor superfamily protein Plant invertase/pectin methylesterase inhibitor superfamily protein
Wa8730a002g004910	1.13067	1.6258e-95	2.26669e-91	0.816	0.241	AT2G28305 AT4G35190 AT5G03270 AT5G06300	ATLOG1, LOG1 LOG5 LOG6 LOG7	Putative lysine decarboxylase family protein Putative lysine decarboxylase family protein lysine decarboxylase family protein Putative lysine decarboxylase family protein
Wa8730a017g003320	1.12549	3.52512e-63	4.91473e-59	0.735	0.269	AT5G53750		CBS domain-containing protein
Wa8730a007g002980	1.12508	1.02553e-59	1.42979e-55	0.383	0.074
Wa8730a007g005460	1.11754	7.41347e-70	1.03359e-65	0.97	0.473
Wa8730a006g004380	1.11358	7.41969e-67	1.03445e-62	0.837	0.341	AT3G07570		Cytochrome b561/ferric reductase transmembrane with DOMON related domain
Wa8730a011g000940	1.112	1.38653e-62	1.9331e-58	0.262	0.027	AT3G21240 AT1G65060	4CL2, AT4CL2 4CL3	encodes an isoform of 4-coumarate:CoA ligase (4CL), which is involved in the last step of the general phenylpropanoid pathway. The catalytic efficiency was in the following (descending) order: p-coumaric acid, caffeic acid, ferulic acid, 5-OH-ferulic acid and cinnamic acid. At4CL2 was unable to use sinapic acid as substrate. encodes an isoform of 4-coumarate:CoA ligase (4CL), which is involved in…
Wa8730a019g003750	1.10873	1.39175e-128	1.94038e-124	0.741	0.135	AT5G02400 AT3G09400 AT2G46920 AT3G17090	PLL2 PLL3 POL	Encodes a protein with similarity to the POL locus which is a novel protein phosphatase 2C. Ubiquitously expressed. No phenotype observed in homozygous null mutant background. Similar to POLTERGEIST (POL) protein phosphatase 2C. No phenotype observed in plants homozygous for a null allele. Ubiquitously expressed. Pol mutations are recessive, partial suppressors of meristem defects in strong clv1 …
Wa8730a003g003050	1.10791	6.26349e-102	8.73255e-98	0.819	0.231	AT5G39220 AT1G13820		alpha/beta-Hydrolases superfamily protein alpha/beta-Hydrolases superfamily protein
Wa8730a010g004180	1.10258	8.75114e-80	1.22008e-75	0.358	0.042	AT1G67980 AT4G26220	CCOAMT CCoAOMT7	Encodes S-adenosyl-L-methionine: transcaffeoyl Coenzyme A 3-O-methyltransferase. Encodes a caffeoyl-coenzyme A O-methyltransferase (CCoAOMT)-like protein with a strong preference for methylating the para position of flavanones and dihydroflavonols, whereas flavones and flavonols are methylated in the meta-position.
Wa8730a008g005930	1.08965	5.46506e-170	7.61938e-166	0.485	0.022	AT4G21380 AT4G28350 AT1G50610 AT4G03230 AT1G61610 AT4G27290 AT1G11300	ARK3, RK3 LecRK-VII.2 PRK5	encodes a putative receptor-like serine/threonine protein kinases that is similar to Brassica self-incompatibility (S) locus. Expressed in root. Shoot expression limited to limited to the root-hypocotyl transition zone and at the base of lateral roots as well as in axillary buds, and pedicels. Concanavalin A-like lectin protein kinase family protein Leucine-rich repeat protein kinase family prote…
Wa8730a011g003790	1.08576	4.46486e-59	6.2249e-55	0.675	0.231	AT5G57620 AT5G67300 AT4G37260	AtMYB36, MYB36 ATMYB44, ATMYBR1, MYB44, MYBR1 ATMYB73, MYB73	Encodes a putative transcription factor (MYB36). Member of the R2R3 factor MYB gene family involved in mediating plant responses to a variety of abiotic stimiuli. Member of the R2R3 factor gene family.
Wa8730a006g002750	1.08458	3.29018e-126	4.58717e-122	0.392	0.023	AT1G78080 AT1G22190 AT4G13620	AtWIND1, RAP2.4, WIND1 RAP2.4	Encodes a member of the DREB subfamily A-6 of ERF/AP2 transcription factor family (RAP2.4). The protein contains one AP2 domain. Role in mediating light and ethylene signaling. The gene encodes a putative transcription factor belongings to the abiotic stress-associated DREB A-6 clade. The mRNA is cell-to-cell mobile. encodes a member of the DREB subfamily A-6 of ERF/AP2 transcription factor famil…
Wa8730a015g000890	1.08438	3.52813e-43	4.91891e-39	0.895	0.506	AT4G30290 AT5G48070 AT2G18800 AT4G25810 AT5G57550	ATXTH19, XTH19 ATXTH20, XTH20 ATXTH21, XTH21 XTH23, XTR6 XTH25, XTR3	Encodes a xyloglucan endotransglucosylase/hydrolase with only only the endotransglucosylase (XET EC 2.4.1.207) activity towards xyloglucan and non-detectable endohydrolytic (XEH EC 3.2.1.151) activity. Expressed throughout both the main and the lateral root, with intensive expression at the dividing and elongating regions. Is expressed in lateral root primordia but expression ceases after lateral…
Wa8730a007g000380	1.07816	9.40991e-50	1.31193e-45	0.672	0.255	AT3G44260 AT5G22250	AtCAF1a, CAF1a AtCAF1b, CAF1b	Encodes one of the homologs of the yeast CCR4-associated factor 1: AT3G44260 (CAF1a), AT5G22250 (CAF1b). Has mRNA deadenylation activity. Also plays a role in plant defense responses. Encodes one of the homologs of the yeast CCR4-associated factor 1: AT3G44260 (CAF1a), AT5G22250 (CAF1b). Has mRNA deadenylation activity. Also plays a role in plant defense responses.
Wa8730a018g002220	1.07183	1.26863e-60	1.76873e-56	0.88	0.447	AT2G47485
Wa8730a015g001450	1.06706	5.63324e-79	7.85386e-75	0.931	0.496	AT3G21150 AT2G24790 AT5G24930 AT5G57660	AtBBX32, BBX32, EIP6 ATCOL3, BBX4, COL3 ATCOL4, BBX5, COL4 ATCOL5, BBX6, COL5	Encodes a protein with a B-box domain predicted to act as a transcription factor. Expression of the BBX32 gene is affected by monochromatic red light. Positive regulator of photomorphogenesis that acts downstream of COP1 but can promote lateral root development independently of COP1 and also function as a daylength-sensitive regulator of shoot branching. CONSTANS-like 4 CONSTANS-like 5
Wa8730a016g000330	1.06316	6.42148e-45	8.95283e-41	0.708	0.318	AT3G47710 AT1G26945	BHLH161, BNQ3 KDR, PRE6	BNQ3 belongs to a family of atypical non-DNA binding basic helix-loop-helix (bHLH) proteins that heterodimerize with and negatively regulate bHLH transcription factors. Directly and negatively regulated by AP3 and PI in petals. Required for appropriate regulation of flowering time.May also have a role in regulating light responses. Encodes a basic helix-loop-helix (bHLH) protein involved in blue/…
Wa8730a002g001260	1.06243	6.04632e-107	8.42979e-103	0.72	0.161	AT4G24040	ATTRE1, TRE1	Encodes a trehalase, member of Glycoside Hydrolase Family 37.
Wa8730a007g000310	1.05579	1.20178e-73	1.67552e-69	0.732	0.226	AT2G36090		F-box family protein
Wa8730a005g005530	1.04842	3.87996e-163	5.40943e-159	0.566	0.042	AT3G49190		O-acyltransferase (WSD1-like) family protein
Wa8730a006g006710	1.04685	1.12471e-55	1.56807e-51	0.407	0.09	AT1G12880 AT2G01670 AT1G14860 AT1G73540 AT1G18300	NUDT12, atnudt12 NUDT17, atnudt17 NUDT18, atnudt18 NUDT21, atnudt21 NUDT4, atnudt4	nudix hydrolase homolog 12 nudix hydrolase homolog 17 nudix hydrolase homolog 18 nudix hydrolase homolog 21 nudix hydrolase homolog 4
Wa8730a001g010050	1.04447	5.08537e-123	7.09002e-119	0.581	0.077	AT1G80050 AT4G22570 AT4G12440	APT2, ATAPT2, PHT1.1 APT3 APT4	Encodes an adenosine phosphoribosyl transferase(E.C:2.4.2.7), a constitutively expressed enzyme involved in the one-step salvage of adenine to AMP. This isozyme has high affinity for cytokinins and is likely to be localized to the cytosol. Encodes an adenine phosphoribosyltransferase (APT EC 2.4.2.7), which is a constitutively expressed enzyme involved in the one-step salvage of adenine to AMP. A…
Wa8730a015g001580	1.04208	8.80731e-44	1.22791e-39	0.614	0.235	AT4G30280 AT5G48070 AT2G18800 AT4G25810 AT5G57550	ATXTH18, XTH18 ATXTH20, XTH20 ATXTH21, XTH21 XTH23, XTR6 XTH25, XTR3	Encodes a xyloglucan endotransglucosylase/hydrolase with only only the endotransglucosylase (XET EC 2.4.1.207) activity towards xyloglucan and non-detectable endohydrolytic (XEH EC 3.2.1.151) activity. Expressed in the mature or basal regions of both the main and lateral roots, but not in the tip of these roots where cell division occurs. putative xyloglucan endotransglycosylase/hydrolase, expres…
Wa8730a001g007240	1.02773	4.95958e-65	6.91465e-61	0.5	0.117	AT3G10320 AT2G41640 AT3G57380		MUCI21 is a GT61 protein required for the production of highly branched xylan in seed coat mucilage. MUCI21 likely decorates xylan with xylose side chains that seem to be necessary for pectin attachment to the seed surface. Glycosyltransferase family 61 protein Glycosyltransferase family 61 protein
Wa8730a007g002860	1.02346	3.54121e-105	4.93716e-101	0.714	0.159	AT1G67330 AT4G24910 AT1G27930		Protein of unknown function (DUF579) Protein of unknown function (DUF579) Function unknown. Interacts with eIF3.
Wa8730a014g000910	1.02204	3.65217e-59	5.09186e-55	0.518	0.134	AT5G67450 AT3G19580 AT5G43170 AT1G27730 AT2G28710 AT3G49930 AT1G49900	AZF1, ZF1 AZF2, ZF2 AZF3, ZF3 STZ, ZAT10	Encodes zinc-finger protein. mRNA levels are elevated in response to low temperature, cold temperatures and high salt. The protein is localized to the nucleus and acts as a transcriptional repressor. Encodes zinc finger protein. mRNA levels are upregulated in response to ABA, high salt, and mild dessication. The protein is localized to the nucleus and acts as a transcriptional repressor. Encodes …
Wa8730a003g001750	1.01887	4.11857e-85	5.74211e-81	0.87	0.31
Wa8730a002g009930	1.0179	3.47063e-145	4.83875e-141	0.494	0.036	AT2G28630 AT5G04530 AT1G04220	KCS12 KCS19 KCS2	Encodes KCS12, a member of the 3-ketoacyl-CoA synthase family involved in the biosynthesis of VLCFA (very long chain fatty acids). Encodes KCS19, a member of the 3-ketoacyl-CoA synthase family involved in the biosynthesis of VLCFA (very long chain fatty acids). Encodes KCS2, a member of the 3-ketoacyl-CoA synthase family involved in the biosynthesis of VLCFA (very long chain fatty acids).
Wa8730a015g001170	1.0171	8.09435e-153	1.12851e-148	0.548	0.044	AT1G16060 AT1G79700	ADAP, WRI3 WRI4	Encodes ADAP, an AP2-domain protein that interacts with ARIA. ADAP is a positive regulator of the ABA response and is also involved in regulating seedling growth. WRI4 encodes an AP2/ERF-type transcriptional activator that specifically controls cuticular wax biosynthesis in Arabidopsis stems. It also functions to activate transcription of genes involved fatty acid biosynthesis during seed and flo…
Wa8730a004g002560	1.01525	9.21246e-47	1.2844e-42	0.69	0.287
Wa8730a013g006060	1.0068	1.42355e-96	1.98472e-92	0.786	0.214	AT2G28450 AT3G09760		zinc finger (CCCH-type) family protein RING/U-box superfamily protein
Wa8730a003g007000	1.00679	5.71575e-93	7.9689e-89	0.669	0.156	AT1G19180 AT3G43440 AT5G20900 AT1G74950 AT4G14720	AtJAZ1, JAZ1, TIFY10A JAZ11, TIFY3A JAZ12, TIFY3B JAZ2, TIFY10B PPD2, TIFY4B	JAZ1 is a nuclear-localized protein involved in jasmonate signaling. JAZ1 transcript levels rise in response to a jasmonate stimulus. JAZ1 can interact with the COI1 F-box subunit of an SCF E3 ubiquitin ligase in a yeast-two-hybrid assay only in the presence of jasmonate-isoleucine (JA-ILE) or coronatine. Application of jasmonate methyl ester to Arabidopsis roots reduces the levels of a JAZ1:GUS …
Wa8730a010g001960	1.00313	2.62081e-44	3.65394e-40	0.53	0.173	AT2G31090 AT2G20562		Encodes a signalling peptide influencing lateral organ separation. Encodes a putative signalling peptide with similarity to TAX1. No known function has been demonstrated yet.

## Sheet: Dawn C4 DEGs
Dataset S8. Differentially Expressed Genes for Dawn Cluster 4
Genes showing significant differential expression (log2FC>1 & p_val_adj <0.05 & PCT1 > 10%) in the given cluster versus all other cells in the dawn dataset
PCT1: Percentage of cells within the cluster expressing the gene
PCT2: Percentage of cells outside the cluster expressing the gene
Gene	Ave. Log2 FC	p Value	p Value Adj.	PCT1	PCT2	Arabidopsis orthologues	Arabidopsis gene names	Arabidopsis gene description
Wa8730a006g002780	3.86279	6.26939e-43	8.74079e-39	0.718	0.409
Wa8730a010g004750	3.65119	1.12997e-136	1.57541e-132	0.498	0.041	AT4G09600 AT1G10588	GASA3	One of GASA gene family which is related to a GA-stimulated transcript (GAST) from tomato. Encodes a Gibberellin-regulated GASA/GAST/Snakin family protein
Wa8730a010g002220	3.43996	3.80658e-131	5.30713e-127	0.521	0.052	AT5G53880
Wa8730a006g002770	3.3971	1.61971e-71	2.25819e-67	0.398	0.062	AT1G22450	ATCOX6B2, COX6B	subunit 6b of cytochrome c oxidase
Wa8730a005g003250	3.03665	1.92917e-141	2.68966e-137	0.764	0.148	AT1G73190 AT3G16240 AT4G01470 AT2G36830 AT2G25810 AT1G52180	ALPHA-TIP, TIP3 1 AQP1, ATTIP2 1, DELTA-TIP, DELTA-TIP1, TIP2 1 ATTIP1.3, GAMMA-TIP3, TIP1 3 GAMMA-TIP, GAMMA-TIP1, TIP1 1 TIP4 1	Moves to the Protein Storage Vacuole in a Golgi independent manner Delta tonoplast intrinsic protein, functions as a water channel and ammonium (NH3) transporter. Highly expressed in flower, shoot, and stem. Expression shows diurnal regulation and is induced by ammonium (NH3). Protein localized to vacuolar membrane. Encodes AtTIP1 3, functions as water and urea channels in pollen. Encodes a tonop…
Wa8730a010g004730	2.96175	2.30037e-97	3.20718e-93	0.641	0.147	AT4G09600 AT1G10588	GASA3	One of GASA gene family which is related to a GA-stimulated transcript (GAST) from tomato. Encodes a Gibberellin-regulated GASA/GAST/Snakin family protein
Wa8730a006g000440	2.55573	7.95516e-109	1.10911e-104	0.923	0.438	AT5G54770	THI1, THI4, TZ	Encodes a thiamine biosynthetic gene that has a dual function in thiamine biosynthesis and mitochondrial DNA damage tolerance. It appears to be involved in producing the thiazole portion of thiamine (vitamin B1). A crystal structure of the protein reveals that it forms a 2-ring homo-octamer.
Wa8730a020g003110	2.54791	1.39036e-09	1.93844e-05	0.378	0.251	AT1G24577
Wa8730a009g000730	2.22961	1.24194e-76	1.73151e-72	0.834	0.433	AT3G46010 AT5G59890 AT4G00680	ADF1, ATADF1, atadf ADF4, ATADF4 ADF8	Actin-depolymerizing factor (ADF) and cofilin define a family of actin-binding proteins essential for the rapid turnover of filamentous actin in vivo. actin depolymerizing factor 4 (ADF4) mRNA, complete cds actin depolymerizing factor 8
Wa8730a010g004740	2.19331	3.14104e-68	4.37924e-64	0.56	0.144	AT4G09600 AT1G10588	GASA3	One of GASA gene family which is related to a GA-stimulated transcript (GAST) from tomato. Encodes a Gibberellin-regulated GASA/GAST/Snakin family protein
Wa8730a005g003170	2.05265	4.78775e-96	6.67508e-92	0.988	0.936	AT1G73190 AT3G16240 AT4G01470 AT2G36830 AT2G25810 AT1G52180	ALPHA-TIP, TIP3 1 AQP1, ATTIP2 1, DELTA-TIP, DELTA-TIP1, TIP2 1 ATTIP1.3, GAMMA-TIP3, TIP1 3 GAMMA-TIP, GAMMA-TIP1, TIP1 1 TIP4 1	Moves to the Protein Storage Vacuole in a Golgi independent manner Delta tonoplast intrinsic protein, functions as a water channel and ammonium (NH3) transporter. Highly expressed in flower, shoot, and stem. Expression shows diurnal regulation and is induced by ammonium (NH3). Protein localized to vacuolar membrane. Encodes AtTIP1 3, functions as water and urea channels in pollen. Encodes a tonop…
Wa8730a006g001200	2.03923	2.53551e-112	3.53501e-108	0.544	0.075	AT3G22120 AT4G15160 AT1G62500	CWLP	cell wall-plasma membrane linker protein homolog (CWLP) Bifunctional inhibitor/lipid-transfer protein/seed storage 2S albumin superfamily protein Bifunctional inhibitor/lipid-transfer protein/seed storage 2S albumin superfamily protein
Wa8730a005g003780	1.84691	1.92581e-57	2.68496e-53	0.243	0.024	AT4G23630 AT4G11220 AT5G41600 AT1G64090 AT4G01230 AT2G46170 AT3G61560	BTI1, RTNLB1 BTI2, RTNLB2 BTI3, RTNLB4 RTNLB3	VIRB2-interacting protein 1 VIRB2-interacting protein 2 VIRB2-interacting protein 3 Reticulan like protein B3 Reticulon family protein Reticulon family protein Reticulon family protein
Wa8730a009g004140	1.82006	6.94612e-99	9.68429e-95	0.51	0.074	AT5G16730 AT3G05900		Encodes a microtubule-associated protein. The mRNA is cell-to-cell mobile. neurofilament protein-related
Wa8730a018g000210	1.71093	6.26783e-26	8.7386e-22	0.224	0.052	AT5G02020 AT3G55646 AT3G46880 AT5G59080 AT2G39855 AT5G05965	SIS	Encodes a protein involved in salt tolerance, names SIS (Salt Induced Serine rich).
Wa8730a004g003440	1.71044	1.37562e-45	1.91789e-41	0.78	0.519	AT5G20020	RAN2	A member of RAN GTPase gene family. Encodes a small soluble GTP-binding protein. Likely to be involved in nuclear translocation of proteins. May also be involved in cell cycle progression.
Wa8730a008g004210	1.70068	4.61929e-25	6.44021e-21	0.614	0.348	AT4G21960	PRXR1	Encodes AT4g21960 (AT4g21960/T8O5_170).
Wa8730a004g001700	1.69438	2.96773e-48	4.13762e-44	0.853	0.568	AT5G60490 AT5G44130 AT2G20520	AtFLA12, FLA12 FLA13 FLA6	Encodes a member of fasciclin-like arabinogalactan proteins (FLAs) containing a cell adhesion fasciclin (FAS) domain. Mutations result in altered stem biomechanics with reduced tensile strength and reduced tensile modulus of elasticity, as well as altered cell wall architecture and composition, with increased cellulose microfibril angle, reduced arabinose, galactose and cellulose content. FASCICL…
Wa8730a001g005450	1.67101	8.28672e-40	1.15533e-35	0.672	0.377	AT2G33070 AT3G07720	ATNSP2, NSP2	Encodes a nitrile-specifier protein NSP2. NSP2 is one out of five (At3g16400/NSP1, At2g33070/NSP2, At3g16390/NSP3, At3g16410/NSP4 and At5g48180/NSP5) A. thaliana epithiospecifier protein (ESP) homologues that promote simple nitrile, but not epithionitrile or thiocyanate formation. Galactose oxidase/kelch repeat superfamily protein
Wa8730a005g004460	1.66164	5.62868e-61	7.8475e-57	0.68	0.256	AT2G34070 AT1G29050 AT2G42570 AT2G31110 AT3G14850	TBL37 TBL38 TBL39 TBL40 TBL41	Encodes a member of the TBL (TRICHOME BIREFRINGENCE-LIKE) gene family containing a plant-specific DUF231 (domain of unknown function) domain. TBL gene family has 46 members, two of which (TBR/AT5G06700 and TBL3/AT5G01360) have been shown to be involved in the synthesis and deposition of secondary wall cellulose, presumably by influencing the esterification state of pectic polymers. A nomenclature…
Wa8730a014g001330	1.6403	1.04465e-17	1.45645e-13	0.498	0.29	AT2G03680 AT1G26355 AT1G69230 AT3G02180 AT5G15600	SKU6, SPR1 SP1L1 SP1L2 SP1L3 SP1L4	The SPR1 gene encodes a plant-specific 12-kD protein which has a repeated motif at both ends, separated by a predicted rod-like domain, suggesting that it may act as an intermolecular linker. Ubiquitously expressed and belongs to a six-member gene family in Arabidopsis expressed in transgenic seedlings localized to microtubules within the cortical array, preprophase band, phragmoplast, and mitoti…
Wa8730a012g002730	1.62215	6.77947e-45	9.45193e-41	0.73	0.395	AT3G25070	RIN4	Encodes a member of the R protein complex and may represent a virulence target of type III pili effector proteins (virulence factors) from bacterial pathogens, which is 'guarded' by R protein complex (RPM1 and RPS2 proteins). RIN4 physically interacts with RPS2 and RPM1 in vivo. Bacterial avirulence (Avr) effectors AvrB, AvrRpm1, and AvrRpt2 induce a mobility shift in RIN4 and expression of AvrRp…
Wa8730a010g003820	1.6179	8.70024e-59	1.21299e-54	0.139	0.002
Wa8730a015g000860	1.57523	1.82979e-48	2.5511e-44	0.691	0.291	AT5G48070 AT2G18800 AT4G30270 AT4G25810 AT5G57550	ATXTH20, XTH20 ATXTH21, XTH21 MERI-5, MERI5B, SEN4, XTH24 XTH23, XTR6 XTH25, XTR3	putative xyloglucan endotransglycosylase/hydrolase, expressed primarily in the stele of mature non-elongating regions of both the main and the lateral root. Is expressed in lateral root primordia but expression ceases after lateral root begins to grow. xyloglucan endotransglucosylase/hydrolase 21 encodes a protein similar to endo xyloglucan transferase in sequence. It is also very similar to BRU1…
Wa8730a014g000600	1.56403	2.51118e-37	3.50109e-33	0.695	0.396
Wa8730a009g006400	1.55754	3.6045e-44	5.0254e-40	0.865	0.66	AT1G13950 AT1G26630 AT1G69410	ATELF5A-1, EIF-5A, EIF5A, ELF5A-1 ATELF5A-2, ELF5A-2, FBR12 ATELF5A-3, ELF5A-3	Encodes eukaryotic translation initiation factor 5A (EIF-5A).In mammalian cells it functions as a shuttle protein that translocates mRNA from the nucleus to cytoplasmic ribosomes. Overexpression results in an increase in both primary and secondary xylem formation. In RNAi suppressed lines, xylem formation is reduced. Eukaryotic translation initiation factor 5A-2. Involved in programmed cell death…
Wa8730a015g005510	1.52713	4.57229e-30	6.37469e-26	0.301	0.083
Wa8730a012g004140	1.46764	1.3244e-14	1.84648e-10	0.456	0.279	AT5G37600 AT3G17820 AT1G66200 AT1G48470	ATGLN1 1, ATGSR1, GLN1 1, GSR ATGSKB6, GLN1.3, GLN1 3 ATGSR2, GLN1 2, GSR2 GLN1 5	encodes a cytosolic glutamine synthetase, the enzyme has high affinity with substrate ammonium encodes a cytosolic glutamine synthetase, the enzyme has low affinity with substrate ammonium encodes a cytosolic glutamate synthetase, this enzyme has low affinity with substrate ammonium Encodes cytosolic glutamine synthase isozyme. Expression of mRNA is not detectable in roots.
Wa8730a017g003860	1.44157	3.02816e-40	4.22187e-36	0.861	0.614	AT1G29930 AT5G54270	AB140, CAB1, CAB140, LHCB1.3 LHCB3, LHCB3*1	Subunit of light-harvesting complex II (LHCII),which absorbs light and transfers energy to the photosynthetic reaction center. Lhcb3 protein is a component of the main light harvesting chlorophyll a/b-protein complex of Photosystem II (LHC II).
Wa8730a005g004040	1.42586	3.48719e-35	4.86184e-31	0.633	0.284	AT2G46330 AT3G61640 AT5G53250	AGP16, ATAGP16 AGP20, AtAGP20 AGP22, ATAGP22	Encodes arabinogalactan protein (AGP16). arabinogalactan protein 20 arabinogalactan protein 22
Wa8730a008g005160	1.40998	1.5597e-50	2.17453e-46	0.436	0.108	AT4G37800 AT1G11545 AT4G03210	XTH7 XTH8 XTH9	xyloglucan endotransglucosylase/hydrolase 7 xyloglucan endotransglucosylase/hydrolase 8 encodes a member of xyloglucan endotransglucosylase/hydrolases (XTHs) that catalyze the cleavage and molecular grafting of xyloglucan chains function in loosening and rearrangement of the cell wall. Gene is expressed in shoot apex region, flower buds, flower stalks and internodes bearing flowers.
Wa8730a016g001710	1.40065	1.95799e-45	2.72983e-41	0.34	0.071	AT5G10310
Wa8730a011g002640	1.38369	4.59473e-43	6.40598e-39	0.459	0.138	AT1G80760 AT2G29870	NIP6, NIP6 1, NLM7	Encodes a protein with boron transporter activity. It helps to preferentially direct boron to young developing tissues in the shoot, such as immature leaves, under low boron conditions. This boron channel appears to be impermeable to water, unlike the closely related NIP5 1 boron transporter. This protein also allows the transport of glycerol, urea, and formimide but not larger uncharged solutes …
Wa8730a001g011970	1.381	1.67678e-12	2.33777e-08	0.486	0.322	AT3G53990		Encodes universal stress protein (USP). Functions as a molecular chaperone under heat shock and oxidative stress conditions. Chaperone activity and assembly into complexes is redox regulated.
Wa8730a010g001200	1.36088	3.08885e-51	4.30648e-47	0.888	0.661	AT4G29350 AT5G56600 AT2G19770	PFN2, PRF2, PRO2 PFN3, PRF3 PRF5	Encodes profilin2, a low-molecular weight, actin monomer-binding protein that regulates the organization of actin cytoskeleton. Expressed in vegetative organs. The first intron of PRF2 enhances gene expression. Encodes profilin3, a low-molecular weight, actin monomer-binding protein that regulates the organization of actin cytoskeleton. Originally known as profilin5, and later named profilin3. Ex…
Wa8730a003g001430	1.34207	1.45277e-36	2.02545e-32	0.954	0.841	AT2G21660 AT1G17640	ATGRP7, CCR2, GR-RBP7, GRP7	Encodes a small glycine-rich RNA binding protein that is part of a negative-feedback loop through which AtGRP7 regulates the circadian oscillations of its own transcript. Gene expression is induced by cold. GRP7 appears to promote stomatal opening and reduce tolerance under salt and dehydration stress conditions, but, promotes stomatal closing and thereby increases stress tolerance under conditio…
Wa8730a012g004800	1.30682	4.16448e-27	5.80611e-23	0.614	0.353	AT4G08685 AT1G78040	SAH7	Encodes a protein, expressed in leaves, with similarity to pollen allergens. Pollen Ole e 1 allergen and extensin family protein
Wa8730a020g001510	1.28503	4.94663e-47	6.89659e-43	0.88	0.67	AT1G27970	NTF2B	Encodes an ortholog of yeast NTF2, a nuclear envelop transport protein that functions as the nuclear import receptor for RanGDP, an essential player in nucleocytoplasmic transport.
Wa8730a006g001380	1.28378	1.81631e-51	2.53231e-47	0.398	0.087
Wa8730a007g009070	1.27949	8.71564e-26	1.21513e-21	0.896	0.769	AT2G27860 AT1G08200	AXS1 AXS2	Encodes UDP-d-apiose/UDP-d-xylose synthase that requires NAD+ for enzymatic activity and is strongly inhibited by UDP-d-galacturonate. Encodes a putative UDP-D-apiose/UPD-D-xylose synthetase.
Wa8730a013g004500	1.26706	8.52145e-53	1.18806e-48	0.351	0.063	AT5G62700 AT5G44340 AT5G23860	TUB3 TUB4 TUB8	encodes tubulin beta-2/beta-3 chain beta tubulin gene beta-tubulin, preferentially expressed in endodermal and phloem cells of primary roots and in the vascular tissues of leaves, stems, and flowers.
Wa8730a004g002110	1.25593	2.3828e-18	3.3221e-14	0.564	0.338	AT5G41700 AT5G53300 AT5G56150 AT4G27960	ATUBC8, UBC8 UBC10 UBC30 UBC9	One of the polypeptides that constitute the ubiquitin-conjugating enzyme E2 Encodes a ubiquitin conjugating enzyme. ubiquitin-conjugating enzyme 30 ubiquitin conjugating enzyme
Wa8730a017g003930	1.252	5.81382e-29	8.10563e-25	0.625	0.34	AT1G29930 AT5G54270	AB140, CAB1, CAB140, LHCB1.3 LHCB3, LHCB3*1	Subunit of light-harvesting complex II (LHCII),which absorbs light and transfers energy to the photosynthetic reaction center. Lhcb3 protein is a component of the main light harvesting chlorophyll a/b-protein complex of Photosystem II (LHC II).
Wa8730a003g001370	1.24884	3.25067e-29	4.53208e-25	0.448	0.177	AT1G64740 AT1G50010	TUA1 TUA2	alpha-tubulin expressed primarily in stamens and mature pollen Encodes alpha-2,4 tubulin. TUA2 and TUA4 encode identical proteins.
Wa8730a001g009440	1.24879	4.28466e-38	5.97367e-34	0.506	0.184
Wa8730a002g007210	1.23378	3.51245e-21	4.89706e-17	0.529	0.285	AT1G03630 AT5G54190 AT4G27440	POR, PORC PORA PORB	Encodes for a protein with protochlorophyllide oxidoreductase activity. The enzyme is NADPH- and light-dependent. light-dependent NADPH:protochlorophyllide oxidoreductase A light-dependent NADPH:protochlorophyllide oxidoreductase B
Wa8730a004g000840	1.233	4.91349e-42	6.85038e-38	0.846	0.603	AT2G42590 AT5G38480	GF14, GRF9 GRF3, RCI1	14-3-3 gene. Binds calcium and displays induced structural changes. general regulatory factor, a 14-3-3 gene
Wa8730a003g008300	1.22403	8.03083e-37	1.11966e-32	0.22	0.034	AT4G33200 AT1G04160 AT1G08730 AT1G54560 AT5G20490	ATXI-I, XI-15, XI-I ATXIB, XI-8, XI-B, XIB ATXIC, XIC ATXIE, XIE ATXIK, XI-17, XI-K, XIK	member of Myosin-like proteins Encodes a member of the type XI myosin protein family involved in root hair elongation. Class XI myosin gene member of Myosin-like proteins Encodes a member of the type XI myosin protein family involved in root hair growth, trichome development, and organelle trafficking. This gene appears to be expressed at low levels throughout the plant.
Wa8730a004g000530	1.20791	6.27644e-38	8.75061e-34	0.363	0.097	AT2G34430	LHB1B1, LHCB1.4	Photosystem II type I chlorophyll a/b-binding protein
Wa8730a020g001280	1.20674	3.29727e-33	4.59705e-29	0.355	0.101	AT3G27170	ATCLC-B, CLC-B	member of Anion channel protein family
Wa8730a006g002040	1.195	7.76036e-19	1.08195e-14	0.676	0.496	AT3G26650 AT1G13440 AT1G79530 AT1G16300	GAPA, GAPA-1 GAPC-2, GAPC2 GAPCP-1 GAPCP-2	Encodes one of the two subunits forming the photosynthetic glyceraldehyde-3-phosphate dehydrogenase (GAPDH) and as such a constituent of the supramolecular complex with phosphoribulokinase (PRK) thought to be linked by a small peptide encoded by CP12-2. GapA-1 is coordinately expressed by light with PRK and CP12-2. The enzyme activity, tested in leaf protein extracts dropped significantly after e…
Wa8730a001g006760	1.19347	9.96342e-20	1.3891e-15	0.56	0.315
Wa8730a007g000790	1.18657	9.54177e-26	1.33031e-21	0.768	0.582
Wa8730a008g003960	1.181	7.73953e-07	0.0107904	0.614	0.486
Wa8730a013g005950	1.16993	3.88264e-37	5.41318e-33	0.792	0.554	AT3G53420 AT1G01620 AT4G00430 AT2G37170 AT3G54820	AtPIP2 1, PIP2, PIP2 1, PIP2A PIP1 3, PIP1C, TMP-B PIP1 4, PIP1E, TMP-C PIP2 2, PIP2B PIP2 5, PIP2D	a member of the plasma membrane intrinsic protein subfamily PIP2. localizes to the plasma membrane and exhibits water transport activity in Xenopus oocyte. expressed specifically in the vascular bundles and protein level increases slightly during leaf dev. When expressed in yeast cells can conduct hydrogen peroxide into those cells. a member of the plasma membrane intrinsic protein subfamily PIP1…
Wa8730a003g006820	1.16079	3.7997e-25	5.29755e-21	0.571	0.309
Wa8730a005g001920	1.16006	2.48962e-26	3.47103e-22	0.278	0.078	AT1G45130 AT3G13750 AT4G26140 AT3G52840 AT4G36360 AT5G56870 AT2G28470	AtBGAL5, BGAL5 BGAL1 BGAL12 BGAL2 BGAL3 BGAL4 BGAL8	beta-galactosidase 5 beta-galactosidase, glycosyl hydrolase family 35 putative beta-galactosidase beta-galactosidase 2 putative beta-galactosidase (BGAL3 gene) beta-galactosidase 4 putative beta-galactosidase (BGAL8 gene)
Wa8730a016g002350	1.15714	3.95059e-45	5.50792e-41	0.873	0.54	AT1G37130 AT1G77760	ATNR2, B29, CHL3, NIA2, NIA2-1, NR, NR2 GNR1, NIA1, NR1	Identified as a mutant resistant to chlorate. Encodes nitrate reductase structural gene. Involved in nitrate assimilation. Has nitrate reductase activity. Up-regulated by the fungus P. indica. Binds transcription factor At2g35940. Encodes the cytosolic minor isoform of nitrate reductase (NR). Involved in the first step of nitrate assimilation, it contributes about 15% of the nitrate reductase act…
Wa8730a014g003530	1.15191	2.68054e-28	3.73721e-24	0.803	0.591	AT2G01850 AT1G14720 AT4G13090 AT4G18990 AT1G32170	ATXTH27, EXGT-A3, XTH27 ATXTH28, EXGT-A2, XTH28, XTR2 XTH2 XTH29 XTH30, XTR4	EXGT-A3 has homology to xyloglucan endotransglucosylases/hydrolases (XTHs). Mutants in this gene show a lesion mimic phenotype associated with leaf maturation and a reduction in the number of tertiary veins. Individual tracheary elements in the mutants are shorter, but phloem transport activity is not severely affected. EXGT-A3 plays a role in xyloglucan degradation in the differentiating trachea…
Wa8730a011g000410	1.139	1.54408e-21	2.15276e-17	0.529	0.292	AT3G03150 AT5G17165
Wa8730a014g000640	1.13805	1.01949e-19	1.42137e-15	0.378	0.167
Wa8730a001g012480	1.12044	7.50614e-55	1.04651e-50	0.996	0.955	AT2G45960 AT3G53420 AT2G37180 AT5G60660 AT2G39010 AT4G35100	ATHH2, PIP1 2, PIP1B, TMP-A AtPIP2 1, PIP2, PIP2 1, PIP2A PIP2 3, PIP2C, RD28 PIP2 4, PIP2F PIP2 6, PIP2E PIP2 7, PIP3, PIP3A, SIMIP	a member of the plasma membrane intrinsic protein subfamily PIP1. localizes to the plasma membrane and exhibits water transport activity in Xenopus oocyte. expressed ubiquitously and protein level decreases slightly during leaf development. a member of the plasma membrane intrinsic protein subfamily PIP2. localizes to the plasma membrane and exhibits water transport activity in Xenopus oocyte. ex…
Wa8730a017g000970	1.11214	4.08685e-31	5.69789e-27	0.745	0.466
Wa8730a004g005110	1.10837	1.51983e-20	2.11895e-16	0.421	0.194	AT4G05150 AT3G18230 AT5G49920		Octicosapeptide/Phox/Bem1p family protein Octicosapeptide/Phox/Bem1p family protein Octicosapeptide/Phox/Bem1p family protein
Wa8730a004g001010	1.08866	6.46129e-23	9.00832e-19	0.486	0.237
Wa8730a013g004640	1.08401	2.23386e-22	3.11445e-18	0.274	0.086	AT3G09840 AT3G53230 AT5G03340 AT3G54830	ATCDC48, CDC48, CDC48A AtCDC48B AtCDC48C	Encodes a cell division cycle protein, a member of AAA-type ATPases gene family. Expressed throughout the plant in regions of cell division. Within the cell, sub-cellular localization varies depending on the stage of the cell cycle.Mutants in which the expression of CDC48A is altered show defects in cytokinesis, cell expansion and cell differentiation. CDC48 is induced upon oilseed rape mosaic to…
Wa8730a018g000770	1.08055	1.74968e-104	2.4394e-100	0.29	0.01	AT2G37330	ALS3	Encodes an ABC transporter-like protein, without an ATPase domain, required for aluminum (Al) resistance/tolerance and may function to redistribute accumulated Al away from sensitive tissues in order to protect the growing root from the toxic effects of Al.
Wa8730a012g004780	1.073	1.28345e-25	1.78939e-21	0.892	0.765	AT4G39730 AT2G22170 AT5G65158	PLAT1 PLAT2 PLAT3	Lipase/lipooxygenase, PLAT/LH2 family protein Lipase/lipooxygenase, PLAT/LH2 family protein Lipase/lipooxygenase, PLAT/LH2 family protein
Wa8730a014g001280	1.06414	6.65097e-22	9.27278e-18	0.699	0.469	AT3G13110	ATSERAT2 2, SAT-1, SAT-A, SAT-M, SAT3, SERAT2 2	Encodes a mitochondrial serine O-acetyltransferase involved in sulfur assimilation and cysteine biosynthesis. Expressed in the vascular system.
Wa8730a003g005930	1.05748	9.43902e-19	1.31599e-14	0.633	0.433	AT3G19320 AT1G49750 AT4G06744		Leucine-rich repeat (LRR) family protein Leucine-rich repeat (LRR) family protein Leucine-rich repeat (LRR) family protein
Wa8730a017g001190	1.05626	4.32126e-65	6.0247e-61	0.977	0.907
Wa8730a012g000120	1.04509	3.15868e-15	4.40383e-11	0.625	0.451	AT3G11660 AT2G35960 AT4G09590 AT5G06330 AT3G52470 AT5G22200 AT3G44220	NHL1 NHL12 NHL22	encodes a protein whose sequence is similar to tobacco hairpin-induced gene (HIN1) and Arabidopsis non-race specific disease resistance gene (NDR1). Expression of this gene is induced by cucumber mosaic virus. Localization of the gene product is similar to that of NHL3 (plasma membrane) but it is yet inconclusive. Encodes a protein whose sequence is similar to tobacco hairpin-induced gene (HIN1) …
Wa8730a003g002890	1.01397	1.75864e-28	2.4519e-24	0.328	0.099	AT3G29320	PHS1	Encodes a plastidic alpha-glucan phosphorylase. In vitro, the enzyme has a preference for maltooligosaccharides, such as maltoheptaose.
Wa8730a017g004540	1.0131	3.90167e-15	5.43971e-11	0.552	0.37	AT1G48600 AT3G18000 AT1G73600	AtPMEAMT, PMEAMT NMT1, PEAMT, XPL1	Encodes a phosphoethanolamine N-methyltransferase that catalyses the last two methylation steps of the three sequential methylations of phosphoethanolamine (PEA) that are required for the synthesis of phosphocholine (PCho) in plants. Arabidopsis thaliana N-methyltransferase-like protein mRNA. Reduce transmission through pollen. Encodes a S-adenosyl-L-methionine-dependent phosphoethanolamine N-met…
Wa8730a013g001250	1.01146	2.73987e-26	3.81993e-22	0.394	0.143
Wa8730a013g001200	1.0062	4.94368e-38	6.89248e-34	0.143	0.011	AT4G23340		2-oxoglutarate (2OG) and Fe(II)-dependent oxygenase superfamily protein
Wa8730a007g003860	1.00359	3.1993e-41	4.46046e-37	0.297	0.057

## Sheet: Dawn C5 DEGs
Dataset S8. Differentially Expressed Genes for Dawn Cluster 5
Genes showing significant differential expression (log2FC>1 & p_val_adj <0.05 & PCT1 > 10%) in the given cluster versus all other cells in the dawn dataset
PCT1: Percentage of cells within the cluster expressing the gene
PCT2: Percentage of cells outside the cluster expressing the gene
Gene	Ave. Log2 FC	p Value	p Value Adj.	PCT1	PCT2	Arabidopsis orthologues	Arabidopsis gene names	Arabidopsis gene description
Wa8730a009g002620	2.26886	1.17229e-16	1.6344e-12	0.992	0.983
Wa8730a015g000810	2.21862	8.2767e-80	1.15394e-75	0.794	0.355	AT4G25820 AT4G30290 AT5G48070 AT2G18800 AT5G57550	ATXTH14, XTH14, XTR9 ATXTH19, XTH19 ATXTH20, XTH20 ATXTH21, XTH21 XTH25, XTR3	Encodes a xyloglucan endotransglycosylase with a clear preference for non-fucosylated xyloglucan polymer. Encodes a xyloglucan endotransglucosylase/hydrolase with only only the endotransglucosylase (XET EC 2.4.1.207) activity towards xyloglucan and non-detectable endohydrolytic (XEH EC 3.2.1.151) activity. Expressed throughout both the main and the lateral root, with intensive expression at the d…
Wa8730a005g008430	1.86567	2.23068e-78	3.11002e-74	0.917	0.602	AT1G67090 AT5G38430	RBCS1A RBCS1B	Encodes a member of the Rubisco small subunit (RBCS) multigene family: RBCS1A (At1g67090), RBCS1B (At5g38430), RBCS2B (At5g38420), and RBCS3B (At5g38410). Functions to yield sufficient Rubisco content for leaf photosynthetic capacity. Encodes a member of the Rubisco small subunit (RBCS) multigene family: RBCS1A (At1g67090), RBCS1B (At5g38430), RBCS2B (At5g38420), and RBCS3B (At5g38410).
Wa8730a011g002740	1.82309	1.99987e-55	2.78822e-51	0.696	0.308
Wa8730a003g001800	1.45726	3.86344e-54	5.38641e-50	0.49	0.131	AT1G47740 AT4G31980		PPPDE putative thiol peptidase family protein
Wa8730a007g001290	1.39297	4.50206e-59	6.27677e-55	0.909	0.677	AT1G10960	ATFD1, FD1	ferredoxin 1
Wa8730a010g000640	1.3772	1.83627e-24	2.56013e-20	0.996	0.998
Wa8730a002g010730	1.37531	8.66516e-40	1.2081e-35	0.771	0.586	AT5G60540	ATPDX2, EMB2407, PDX2	Encodes a protein predicted to function in tandem with PDX1 to form glutamine amidotransferase complex with involved in vitamin B6 biosynthesis. PDX2 is predicted to function as glutaminase within the complex.
Wa8730a008g004910	1.37152	3.57267e-07	0.00498102	0.557	0.456
Wa8730a005g007230	1.29201	1.23246e-49	1.71829e-45	0.862	0.668	AT1G67090 AT5G38420	RBCS1A RBCS2B	Encodes a member of the Rubisco small subunit (RBCS) multigene family: RBCS1A (At1g67090), RBCS1B (At5g38430), RBCS2B (At5g38420), and RBCS3B (At5g38410). Functions to yield sufficient Rubisco content for leaf photosynthetic capacity. Encodes a member of the Rubisco small subunit (RBCS) multigene family: RBCS1A (At1g67090), RBCS1B (At5g38430), RBCS2B (At5g38420), and RBCS3B (At5g38410).
Wa8730a012g002080	1.23783	8.60312e-27	1.19945e-22	0.696	0.474	AT3G26740	CCL	transcripts are differentially regulated at the level of mRNA stability at different times of day controlled by the circadian clock. mRNAs are targets of the mRNA degradation pathway mediated by the downstream (DST) instability determinant.
Wa8730a009g003670	1.23428	1.44576e-16	2.01568e-12	0.561	0.374	AT3G06430 AT5G13800 AT5G39710 AT5G18950 AT3G61520	AtPPR2, EMB2750, PPR2 CRN1, PPH EMB2745	Encodes PPR2, a pentatricopeptide repeat protein. Binds to plastid 23S rRNA and plays an important role in the first mitotic division during gametogenesis and in cell proliferation during embryogenesis. Encodes a pheophytinase that is involved in chlorophyll breakdown. Tetratricopeptide repeat (TPR)-like superfamily protein Tetratricopeptide repeat (TPR)-like superfamily protein Pentatricopeptide…
Wa8730a003g002820	1.21682	1.03414e-28	1.4418e-24	0.502	0.222	AT3G29240		Protein of unknown function (DUF179)
Wa8730a010g003550	1.21392	5.19045e-66	7.23652e-62	1	0.986	AT1G67090 AT5G38410	RBCS1A RBCS3B	Encodes a member of the Rubisco small subunit (RBCS) multigene family: RBCS1A (At1g67090), RBCS1B (At5g38430), RBCS2B (At5g38420), and RBCS3B (At5g38410). Functions to yield sufficient Rubisco content for leaf photosynthetic capacity. Encodes a member of the Rubisco small subunit (RBCS) multigene family: RBCS1A (At1g67090), RBCS1B (At5g38430), RBCS2B (At5g38420), and RBCS3B (At5g38410). Functions…
Wa8730a008g004320	1.19929	4.66248e-45	6.50043e-41	0.874	0.813	AT4G04610 AT1G62180 AT4G21990	APR, APR1, ATAPR1, PRH19 APR2, APSR, ATAPR2, PRH, PRH43 APR3, ATAPR3, PRH-26, PRH26	Encodes a protein disulfide isomerase-like (PDIL) protein, a member of a multigene family within the thioredoxin (TRX) superfamily. This protein also belongs to the adenosine 5'-phosphosulfate reductase-like (APRL) group. encodes a adenosine 5'-phosphosulfate reductase, involved in sulfate assimilation. Is a major effect locus for natural variation of shoot sulfate content in Arabidopsis. Encodes…
Wa8730a006g000980	1.18622	1.32571e-30	1.84831e-26	0.557	0.248	AT3G22120 AT4G15160 AT1G62500	CWLP	cell wall-plasma membrane linker protein homolog (CWLP) Bifunctional inhibitor/lipid-transfer protein/seed storage 2S albumin superfamily protein Bifunctional inhibitor/lipid-transfer protein/seed storage 2S albumin superfamily protein
Wa8730a017g001020	1.18481	6.22237e-31	8.67523e-27	0.711	0.44	AT1G01490		Heavy metal transport/detoxification superfamily protein
Wa8730a004g003150	1.17022	3.77973e-27	5.2697e-23	0.739	0.571
Wa8730a005g007700	1.16507	6.60645e-32	9.21072e-28	0.514	0.213	AT3G59030 AT1G73700 AT1G71140 AT1G66760 AT5G44050 AT1G15170	ATTT12, TT12	Encodes a proton antiporter. Involved in the transportation of proanthocyanidin precursors into the vacuole. In vitro transport experiments showed that cyanidin-3-O-glucoside (anthocyanin) was an effective substrate, whereas the proanthocyanidin precursor epicatechin was not transported. However catechin-3-O-glucoside inhibited anthocyanin transport in a dose-dependent manner suggesting that glyc…
Wa8730a018g000050	1.12727	2.38336e-50	3.32288e-46	0.881	0.834
Wa8730a006g000440	1.1262	1.06207e-31	1.48073e-27	0.787	0.456	AT5G54770	THI1, THI4, TZ	Encodes a thiamine biosynthetic gene that has a dual function in thiamine biosynthesis and mitochondrial DNA damage tolerance. It appears to be involved in producing the thiazole portion of thiamine (vitamin B1). A crystal structure of the protein reveals that it forms a 2-ring homo-octamer.
Wa8730a002g000260	1.11671	9.49368e-08	0.00132361	0.123	0.045
Wa8730a004g006700	1.11599	1.337e-25	1.86404e-21	0.656	0.435
Wa8730a002g007150	1.10238	3.40995e-41	4.75416e-37	0.83	0.706	AT5G23440 AT5G08410	FTRA1 FTRA2	ferredoxin/thioredoxin reductase subunit A (variable subunit) 1 ferredoxin/thioredoxin reductase subunit A (variable subunit) 2
Wa8730a001g006760	1.09417	3.23817e-25	4.51465e-21	0.605	0.31
Wa8730a003g004270	1.09119	2.14145e-28	2.98561e-24	0.783	0.681	AT4G02930		GTP binding Elongation factor Tu family protein
Wa8730a005g007240	1.0855	3.16545e-56	4.41327e-52	0.972	0.883	AT1G67090 AT5G38430	RBCS1A RBCS1B	Encodes a member of the Rubisco small subunit (RBCS) multigene family: RBCS1A (At1g67090), RBCS1B (At5g38430), RBCS2B (At5g38420), and RBCS3B (At5g38410). Functions to yield sufficient Rubisco content for leaf photosynthetic capacity. Encodes a member of the Rubisco small subunit (RBCS) multigene family: RBCS1A (At1g67090), RBCS1B (At5g38430), RBCS2B (At5g38420), and RBCS3B (At5g38410).
Wa8730a016g002350	1.08153	2.69861e-27	3.7624e-23	0.779	0.552	AT1G37130 AT1G77760	ATNR2, B29, CHL3, NIA2, NIA2-1, NR, NR2 GNR1, NIA1, NR1	Identified as a mutant resistant to chlorate. Encodes nitrate reductase structural gene. Involved in nitrate assimilation. Has nitrate reductase activity. Up-regulated by the fungus P. indica. Binds transcription factor At2g35940. Encodes the cytosolic minor isoform of nitrate reductase (NR). Involved in the first step of nitrate assimilation, it contributes about 15% of the nitrate reductase act…
Wa8730a004g005670	1.03625	2.64136e-29	3.68258e-25	0.506	0.214	AT3G17980 AT1G70790 AT1G48590 AT1G23140	AtC2, AtGAP1, C2	Calcium-dependent lipid-binding (CaLB domain) family protein Calcium-dependent lipid-binding (CaLB domain) family protein Calcium-dependent lipid-binding (CaLB domain) family protein Expression is upregulated in the shoot of cax1/cax3 mutant.
Wa8730a001g007790	1.03395	4.07104e-29	5.67585e-25	0.767	0.732	AT1G16880 AT3G09370 AT5G11510 AT5G02320 AT2G23290	ACR11 AtMYB3R3, MYB3R-3 AtMYB3R4, MYB3R-4 ATMYB3R5, MYB3R-5 AtMYB70, MYB70	Encodes a ACT domain-containing protein. The ACT domain, named after bacterial aspartate kinase, chorismate mutase and TyrA (prephenate dehydrogenase), is a regulatory domain that serves as an amino acid-binding site in feedback-regulated amino acid metabolic enzymes. The mRNA is cell-to-cell mobile. putative c-myb-like transcription factor (MYB3R3) mRNA, Arabidopsis thaliana putative c-myb-like …
Wa8730a013g004860	1.03135	1.01703e-25	1.41795e-21	0.557	0.276
Wa8730a013g002900	1.01873	1.39302e-33	1.94215e-29	0.822	0.748
Wa8730a009g004540	1.01261	2.92813e-43	4.0824e-39	0.905	0.879
Wa8730a013g000090	1.00707	1.16118e-30	1.61891e-26	0.455	0.164	AT2G44990 AT4G19170	ATCCD7, CCD7, MAX3 CCD4, NCED4	More Axillary Branching carotenoid cleavage dioxygenases. chloroplast-targeted member of a family of enzymes similar to nine-cis-epoxycarotenoid dioxygenase
Wa8730a001g006830	1.00202	5.61314e-21	7.82583e-17	0.676	0.525	AT2G38270 AT5G40370	ATGRX2, AtGRXS16, CXIP2 GRXC2	Encodes protein homologous to CXIP1. CXIP1 is a PICOT domain containing protein interacts with CAX1, a high capacity calcium transporter. However, CXP2 does not interact with CAX1 and only moderately activates another calcium transporter CAX4. Glutaredoxin family protein

## Sheet: Dawn C6 DEGs
Dataset S8. Differentially Expressed Genes for Dawn Cluster 6
Genes showing significant differential expression (log2FC>1 & p_val_adj <0.05 & PCT1 > 10%) in the given cluster versus all other cells in the dawn dataset
PCT1: Percentage of cells within the cluster expressing the gene
PCT2: Percentage of cells outside the cluster expressing the gene
Gene	Ave. Log2 FC	p Value	p Value Adj.	PCT1	PCT2	Arabidopsis orthologues	Arabidopsis gene names	Arabidopsis gene description
Wa8730a011g000760	2.77869	2.97429e-34	4.14675e-30	0.188	0.022
Wa8730a002g005070	2.34864	2.54513e-37	3.54842e-33	0.13	0.007	AT2G27380	ATEPR1, EPR1	Encodes an extensin like gene involved in seed germination.
Wa8730a014g002160	2.33774	3.8181e-99	5.32319e-95	0.729	0.137
Wa8730a001g006770	2.21309	6.99195e-54	9.74817e-50	0.734	0.288
Wa8730a014g002170	2.04751	1.80461e-74	2.51599e-70	0.839	0.239
Wa8730a015g003250	2.02825	3.64056e-56	5.07567e-52	0.583	0.143	AT3G30842 AT1G15520	ABCG38, ATPDR10, PDR10 ABCG40, ATABCG40, ATPDR12, PDR12	pleiotropic drug resistance 10 ABC transporter family involved in ABA transport and resistance to lead. Localizes to plasma membrane. Upregulated by lead. Expressed in leaves, flowers, stomata and roots.
Wa8730a00Ug000080	1.91891	2.38259e-37	3.3218e-33	0.229	0.029
Wa8730a014g001120	1.88002	2.24895e-112	3.13549e-108	0.677	0.096
Wa8730a009g003220	1.75753	1.57592e-63	2.19715e-59	0.49	0.086
Wa8730a015g004730	1.69874	1.83434e-59	2.55743e-55	0.557	0.122	AT3G28345	ABCB15, MDR13	Encodes an ATP-binding cassette (ABC) transporter. Expressed in the vascular tissue of primary stem.
Wa8730a013g001900	1.69746	4.06217e-55	5.66347e-51	0.5	0.106	AT4G12310 AT2G45570 AT2G46660 AT1G01190	CYP706A5 CYP76C2 CYP78A6, EOD3 CYP78A8	member of CYP706A member of CYP76C member of CYP78A member of CYP78A
Wa8730a010g001140	1.62407	6.38557e-15	8.90277e-11	0.516	0.279	AT4G29190 AT2G25900 AT2G19810 AT1G03790 AT5G44260	AtC3H49, AtOZF2, AtTZF3, OZF2, TZF3 ATCTH, ATTZF1 AtOZF1, AtTZF2, OZF1, TZF2 AtTZF4, SOM, TZF4 AtTZF5, TZF5	Zinc finger C-x8-C-x5-C-x3-H type family protein putative Cys3His zinc finger protein (ATCTH) mRNA, complete Encodes Oxidation-related Zinc Finger 1 (OZF1), a plasma membrane protein involved in oxidative stress. Encodes SOMNUS (SOM), a nucleus-localized CCCH-type zinc finger protein. SOM negatively regulates light-dependent seed germination downstream of PIL5 (AT2G20180). Encodes a Tandem CCCH Z…
Wa8730a003g006910	1.61544	3.04564e-10	4.24624e-06	0.151	0.047	AT3G63410	APG1, E37, IEP37, VTE3	Encodes a MPBQ/MSBQ methyltransferase located in the chloroplast inner envelope membrane. Mutant plants lack plastoquinone (PQ), suggesting that the APG1 protein is involved in the methylation step of PQ biosynthesis. The gene product is also involved in tocopherol (vitamin E) biosynthesis.
Wa8730a002g004860	1.59242	1.4851e-28	2.07052e-24	0.161	0.019	AT2G27380 AT1G20130	ATEPR1, EPR1	Encodes an extensin like gene involved in seed germination. GDSL-motif esterase/acyltransferase/lipase. Enzyme group with broad substrate specificity that may catalyze acyltransfer or hydrolase reactions with lipid and non-lipid substrates.
Wa8730a008g000620	1.5687	2.06183e-44	2.87461e-40	0.911	0.563
Wa8730a002g004080	1.56437	1.14234e-12	1.59265e-08	0.104	0.019	AT1G75930 AT5G37690 AT5G41890 AT4G16230 AT1G20120	EXL6	member of Lipase proteins SGNH hydrolase-type esterase superfamily protein GDSL-motif esterase/acyltransferase/lipase. Enzyme group with broad substrate specificity that may catalyze acyltransfer or hydrolase reactions with lipid and non-lipid substrates. GDSL-motif esterase/acyltransferase/lipase. Enzyme group with broad substrate specificity that may catalyze acyltransfer or hydrolase reactions…
Wa8730a002g001530	1.55289	1.87694e-42	2.61683e-38	0.823	0.388	AT4G24130		Protein of unknown function, DUF538
Wa8730a018g003650	1.5461	4.85026e-72	6.76223e-68	0.531	0.091	AT1G02390 AT4G01950	ATGPAT2, GPAT2 ATGPAT3, GPAT3	Encodes a member of a family of proteins with glycerol-3-phosphate acyltransferase activity. Encodes a member of a family of proteins with glycerol-3-phosphate acyltransferase activity.
Wa8730a012g002610	1.54203	2.34107e-34	3.26393e-30	0.505	0.156	AT5G04180	ACA3, ATACA3	alpha carbonic anhydrase 3
Wa8730a013g005520	1.53453	1.50269e-76	2.09506e-72	0.63	0.128
Wa8730a005g001430	1.52701	9.70052e-86	1.35245e-81	0.688	0.129	AT1G13140 AT4G39490 AT5G02900 AT4G32170 AT5G52320 AT2G21910 AT1G47620	CYP86C3 CYP96A10 CYP96A13 CYP96A2 CYP96A4 CYP96A5 CYP96A8	member of CYP86C member of CYP96A member of CYP96A member of CYP96A member of CYP96A member of CYP96A member of CYP96A
Wa8730a003g001330	1.48757	4.75026e-16	6.62281e-12	0.453	0.205	AT4G37850 AT2G22750		basic helix-loop-helix (bHLH) DNA-binding superfamily protein basic helix-loop-helix (bHLH) DNA-binding superfamily protein
Wa8730a013g002320	1.47986	1.67669e-51	2.33765e-47	0.547	0.135	AT4G12390 AT1G62770	PME1	pectin methylesterase inhibitor 1 Plant invertase/pectin methylesterase inhibitor superfamily protein
Wa8730a001g011180	1.44843	4.45338e-62	6.20891e-58	0.776	0.226	AT5G02540 AT2G37540 AT4G11410		NAD(P)-binding Rossmann-fold superfamily protein NAD(P)-binding Rossmann-fold superfamily protein NAD(P)-binding Rossmann-fold superfamily protein
Wa8730a005g006550	1.4459	1.68636e-18	2.35113e-14	0.604	0.316	AT3G27880 AT5G14730		Protein of unknown function (DUF1645)
Wa8730a015g003240	1.43086	7.00799e-45	9.77054e-41	0.854	0.405	AT3G30842 AT1G15520	ABCG38, ATPDR10, PDR10 ABCG40, ATABCG40, ATPDR12, PDR12	pleiotropic drug resistance 10 ABC transporter family involved in ABA transport and resistance to lead. Localizes to plasma membrane. Upregulated by lead. Expressed in leaves, flowers, stomata and roots.
Wa8730a009g003160	1.42237	1.57865e-63	2.20096e-59	0.656	0.152
Wa8730a017g000080	1.39356	7.54122e-43	1.0514e-38	0.193	0.016	AT3G06060	TSC10A	Encodes one of the Arabidopsis proteins (At3g06060/TSC10A and At5g19200/TSC10B) with significant similarity to the yeast 3-ketodihydrosphinganine (3-KDS) reductase, Tsc10p. Both TSC10A and TSC10B are bona fide 3-KDS reductase as shown by complementation experiment in yeast.
Wa8730a006g003620	1.38081	8.53527e-58	1.18999e-53	0.599	0.147	AT3G48780	ATSPT1, SPT1	Encodes one of the two LCB2 subunits (LCB2a and LCB2b) of serine palmitoyltransferase, an enzyme involved in sphingolipid biosynthesis. LCB2a and LCB2b are functional redundant. Double mutants are gametophytic lethal.
Wa8730a014g002180	1.38045	1.95935e-55	2.73173e-51	0.75	0.211
Wa8730a005g003160	1.37728	2.18203e-48	3.04218e-44	0.568	0.156	AT4G28940		Phosphorylase superfamily protein
Wa8730a020g000810	1.37688	5.47232e-31	7.6295e-27	0.771	0.414	AT3G52720 AT2G28210 AT5G04180 AT1G08080	ACA1, ATACA1, CAH1 ACA2, ATACA2 ACA3, ATACA3 ACA7, ATACA7	Encodes a putative alpha carbonic anhydrase (CAH1) located in the chloroplast stroma. Most chloroplast proteins are encoded by the nuclear genome and imported with the help of sorting signals that are intrinsic parts of the polypeptides. CAH1 takes an alternative route through the secretory pathway, and becomes N-glycosylated before entering the chloroplast. alpha carbonic anhydrase 2 alpha carbo…
Wa8730a016g003520	1.37097	6.83653e-40	9.53149e-36	0.875	0.532	AT5G37600 AT3G17820 AT5G35630 AT1G66200 AT5G16570 AT1G48470	ATGLN1 1, ATGSR1, GLN1 1, GSR ATGSKB6, GLN1.3, GLN1 3 ATGSL1, GLN2, GS2 ATGSR2, GLN1 2, GSR2 GLN1 4 GLN1 5	encodes a cytosolic glutamine synthetase, the enzyme has high affinity with substrate ammonium encodes a cytosolic glutamine synthetase, the enzyme has low affinity with substrate ammonium chloroplastic glutamine synthetase encodes a cytosolic glutamate synthetase, this enzyme has low affinity with substrate ammonium Encodes a cytosolic glutamine synthetase, the enzyme has high affinity with subs…
Wa8730a006g002120	1.3618	9.85809e-40	1.37442e-35	0.927	0.648	AT5G50200 AT4G24715	ATNRT3.1, NRT3.1, WR3 NA	Wound-responsive gene 3 (WR3). Encodes a high-affinity nitrate transporter. Up-regulated by nitrate. Involved in jasmonic acid-independent wound signal transduction. NA
Wa8730a008g001340	1.35288	1.84583e-34	2.57345e-30	0.797	0.42
Wa8730a009g004340	1.34963	3.3969e-17	4.73595e-13	0.292	0.094
Wa8730a008g001000	1.33426	3.51403e-40	4.89926e-36	0.828	0.384
Wa8730a016g002860	1.3282	8.51556e-38	1.18724e-33	0.802	0.361	AT1G68610 AT3G18470 AT1G49030	PCR11	Target promoter of the male germline-specific transcription factor DUO1. PLAC8 family protein PLAC8 family protein
Wa8730a001g000280	1.31333	1.13194e-56	1.57815e-52	0.766	0.222	AT3G12500 AT4G01700 AT1G02360	ATHCHIB, B-CHI, CHI-B, HCHIB, PR-3, PR3	encodes a basic chitinase involved in ethylene/jasmonic acid mediated signalling pathway during systemic acquired resistance based on expression analyses. Chitinase family protein Chitinase family protein
Wa8730a003g004980	1.30885	1.045e-49	1.45694e-45	0.344	0.053	AT3G51590	LTP12	Encodes a member of the lipid transfer protein family. Proteins of this family are generally small (~9 kD), basic, expressed abundantly and contain eight Cys residues. The proteins can bind fatty acids and acylCoA esters and can transfer several different phospholipids. They are localized to the cell wall. The LTP12 promoter is active exclusively in the tapetum during the uninucleate microspore a…
Wa8730a001g008770	1.30674	8.3838e-34	1.16887e-29	0.406	0.105
Wa8730a004g007210	1.3016	1.12021e-31	1.56179e-27	0.656	0.285	AT5G45650 AT4G15040		subtilase family protein Subtilisin-like serine endopeptidase family protein
Wa8730a007g002110	1.29895	1.1367e-09	1.58478e-05	0.135	0.039
Wa8730a012g004900	1.28303	2.68573e-47	3.74444e-43	0.688	0.207	AT5G10180 AT1G78000 AT4G08620 AT1G22150	AST68, SULTR2 1 SEL1, SULTR1 2 SULTR1 1 SULTR1 3	Encodes a low-affinity sulfate transporter expressed in the root cap and central cylinder, where it is induced by sulfur starvation. Expression in the shoot vascular system is not induced by sulfur starvation. Encodes a sulfate transporter that can restore sulfate uptake capacity of a yeast mutant lacking sulfate transporter genes. Encodes a sulfate transporter. Contains STAS domain. Expressed in…
Wa8730a001g007430	1.27989	1.52156e-47	2.12136e-43	0.755	0.295	AT4G25850 AT5G57240	ORP4B ORP4C	OSBP(oxysterol binding protein)-related protein 4B OSBP(oxysterol binding protein)-related protein 4C
Wa8730a014g001830	1.27068	6.30774e-32	8.79426e-28	0.12	0.008	AT1G55260	LTPG6	Bifunctional inhibitor/lipid-transfer protein/seed storage 2S albumin superfamily protein
Wa8730a015g001580	1.27031	5.86629e-17	8.17879e-13	0.536	0.266	AT4G30280 AT5G48070 AT2G18800 AT4G25810 AT5G57550	ATXTH18, XTH18 ATXTH20, XTH20 ATXTH21, XTH21 XTH23, XTR6 XTH25, XTR3	Encodes a xyloglucan endotransglucosylase/hydrolase with only only the endotransglucosylase (XET EC 2.4.1.207) activity towards xyloglucan and non-detectable endohydrolytic (XEH EC 3.2.1.151) activity. Expressed in the mature or basal regions of both the main and lateral roots, but not in the tip of these roots where cell division occurs. putative xyloglucan endotransglycosylase/hydrolase, expres…
Wa8730a017g002540	1.26658	5.87767e-31	8.19465e-27	0.833	0.482	AT2G45960 AT3G61430 AT1G01620 AT4G00430 AT4G23400 AT2G37170 AT2G39010 AT4G35100 AT2G16850	ATHH2, PIP1 2, PIP1B, TMP-A ATPIP1, PIP1, PIP1 1, PIP1A PIP1 3, PIP1C, TMP-B PIP1 4, PIP1E, TMP-C PIP1 5, PIP1D PIP2 2, PIP2B PIP2 6, PIP2E PIP2 7, PIP3, PIP3A, SIMIP PIP2 8, PIP3B	a member of the plasma membrane intrinsic protein subfamily PIP1. localizes to the plasma membrane and exhibits water transport activity in Xenopus oocyte. expressed ubiquitously and protein level decreases slightly during leaf development. a member of the plasma membrane intrinsic protein subfamily PIP1. localizes to the plasma membrane and exhibits water transport activity in Xenopus oocyte. ex…
Wa8730a003g008800	1.26087	1.21611e-59	1.6955e-55	0.5	0.091	AT1G08465	YAB2	Member of the YABBY family of Arabidopsis proteins involved in the abaxial cell fate specification in lateral organs
Wa8730a009g003140	1.25294	2.57827e-40	3.59462e-36	0.703	0.278
Wa8730a007g008670	1.25192	2.82338e-30	3.93636e-26	0.703	0.326	AT3G29260 AT4G03140		NAD(P)-binding Rossmann-fold superfamily protein NAD(P)-binding Rossmann-fold superfamily protein
Wa8730a006g006120	1.24761	1.51837e-61	2.11691e-57	0.453	0.077	AT1G11310	ATMLO2, MLO2, PMR2	A member of a large family of seven-transmembrane domain proteins specific to plants, homologs of the barley mildew resistance locus o (MLO) protein. The Arabidopsis genome contains 15 genes encoding MLO proteins, with localization in plasma membrane. Phylogenetic analysis revealed four clades of closely-related AtMLO genes. ATMLO2 belongs to the clade IV, with AtMLO3, AtMLO6 and AtMLO12. The gen…
Wa8730a003g005480	1.24692	2.31168e-32	3.22294e-28	0.854	0.521
Wa8730a004g000410	1.23971	1.39263e-09	1.94161e-05	0.526	0.335	AT1G53170 AT3G23240 AT1G04370 AT2G31230	ATERF-8, ATERF8, ERF8 ATERF1, ERF1 ATERF14, ERF14 ATERF15, ERF15	encodes a member of the ERF (ethylene response factor) subfamily B-1 of ERF/AP2 transcription factor family (ATERF-8). The protein contains one AP2 domain. There are 15 members in this subfamily including ATERF-3, ATERF-4, ATERF-7, and leafy petiole. encodes a member of the ERF (ethylene response factor) subfamily B-3 of ERF/AP2 transcription factor family (ERF1). The protein contains one AP2 dom…
Wa8730a002g005420	1.22933	3.28597e-45	4.58131e-41	0.719	0.276	AT5G24760 AT1G64710 AT1G32780 AT5G42250		GroES-like zinc-binding dehydrogenase family protein GroES-like zinc-binding dehydrogenase family protein GroES-like zinc-binding dehydrogenase family protein Zinc-binding alcohol dehydrogenase family protein
Wa8730a004g003200	1.21592	9.99138e-27	1.393e-22	0.599	0.249
Wa8730a010g000690	1.20714	1.66469e-57	2.32091e-53	0.474	0.087	AT4G31800 AT4G22070	ATWRKY18, WRKY18 ATWRKY31, WRKY31	Pathogen-induced transcription factor. Binds W-box sequences in vitro. Forms protein complexes with itself and with WRKY40 and WRKY60. Constitutive expression of WRKY18 enhanced resistance to P. syringae, but its coexpression with WRKY40 or WRKY60 made plants more susceptible to both P. syringae and B. cinerea. WRKY18, WRKY40, and WRKY60 have partially redundant roles in response to the hemibiotr…
Wa8730a010g000090	1.20603	3.78457e-37	5.27645e-33	0.854	0.449
Wa8730a020g003020	1.20179	1.22115e-35	1.70253e-31	0.755	0.352	AT1G24400 AT5G40780 AT1G67640 AT3G01760	AATL2, ATLHT2, LHT2 LHT1	High-affinity transporter for neutral and acidic amino acids, expressed in tapetum tissue of anthers Encodes LHT1 (lysine histidine transporter), a high-affinity transporter for cellular amino acid uptake in both root epidermis and leaf mesophyll. Transmembrane amino acid transporter family protein Encodes an amino acid transporter expressed in the root that is involved in the uptake of acidic am…
Wa8730a009g005210	1.18736	3.72146e-54	5.18846e-50	0.635	0.17	AT5G20960 AT3G43600 AT1G50780	AAO1, AO1, AOalpha, AT-AO1, ATAO, AtAO1 AAO2, AO3, AOgamma, AtAO3, atAO-2	Encodes aldehyde oxidase AA01. Encodes an aldehyde oxidase. AAO2 does not appear to act on abscisic aldehyde in vitro but it is possible that it may function in abscisic acid biosynthesis when the activity of At2g27150 (AAO3), the primary abscisic aldehyde oxidase, is lost. 2Fe-2S ferredoxin-like superfamily protein
Wa8730a008g001980	1.1813	2.48623e-18	3.4663e-14	0.188	0.041
Wa8730a004g006810	1.16974	1.75976e-21	2.45345e-17	0.672	0.348	AT5G44130	FLA13	FASCICLIN-like arabinogalactan protein 13 precursor
Wa8730a006g006710	1.16685	7.77068e-41	1.08339e-36	0.448	0.106	AT1G12880 AT2G01670 AT1G14860 AT1G73540 AT1G18300	NUDT12, atnudt12 NUDT17, atnudt17 NUDT18, atnudt18 NUDT21, atnudt21 NUDT4, atnudt4	nudix hydrolase homolog 12 nudix hydrolase homolog 17 nudix hydrolase homolog 18 nudix hydrolase homolog 21 nudix hydrolase homolog 4
Wa8730a007g006910	1.16323	6.22325e-09	8.67646e-05	0.635	0.425	AT1G01720 AT5G63790 AT5G08790 AT1G77450	ANAC002, ATAF1 ANAC102, NAC102 ATAF2, anac081 NAC032, anac032	Belongs to a large family of putative transcriptional activators with NAC domain. Transcript level increases in response to wounding and abscisic acid. ATAF1 attentuates ABA signaling and sythesis. Mutants are hyposensitive to ABA. Encodes a member of the NAC family of transcription factors. ANAC102 appears to have a role in mediating response to low oxygen stress (hypoxia) in germinating seedlin…
Wa8730a003g008790	1.15305	1.1739e-57	1.63665e-53	0.651	0.174	AT5G06440 AT3G11720		Polyketide cyclase/dehydrase and lipid transport superfamily protein
Wa8730a016g000390	1.15103	4.83787e-77	6.74496e-73	0.62	0.112
Wa8730a006g004140	1.14586	5.37424e-24	7.49276e-20	0.307	0.08	AT2G41480 AT5G64120 AT5G66390 AT1G05260 AT2G22420 AT2G34060 AT3G21770 AT5G15180 AT5G39580 AT1G49570 AT1G14550	AtPRX25, PRX25 AtPRX71, PRX71 PRX72 RCI3, RCI3A	Encodes a cationic cell-wall-bound peroxidase homolog that is involved in the lignification of cell walls. encodes a cell wall bound peroxidase that is induced by hypo-osmolarity Encodes a peroxidase that is involved in lignin biosynthesis. Encodes a cold-inducible cationic peroxidase that is involved in the stress response. In response to low temperature, RCI3 transcripts accumulate in the aeria…
Wa8730a004g008250	1.13746	1.88819e-96	2.63251e-92	0.422	0.035
Wa8730a004g001070	1.13127	8.58797e-21	1.19733e-16	0.74	0.461	AT5G60770 AT1G12940	ATNRT2.4, NRT2.4 ATNRT2.5, NRT2.5	member of High affinity nitrate transporter family member of High affinity nitrate transporter family
Wa8730a004g008240	1.1306	2.61225e-35	3.642e-31	0.667	0.258
Wa8730a010g002380	1.11644	8.48685e-41	1.18324e-36	0.578	0.181	AT3G15050	IQD10	IQ-domain 10
Wa8730a001g007820	1.1148	5.29119e-36	7.37698e-32	0.734	0.305	AT2G18960 AT1G17260 AT5G62670 AT4G30190 AT5G57350 AT2G24520 AT2G07560 AT1G80660	AHA1, HA1, OST2, PMA AHA10 AHA11, HA11 AHA2, HA2, PMA2 AHA3, ATAHA3, HA3 AHA5, HA5 AHA6, HA6 AHA9, HA9	Encodes a plasma membrane proton ATPase. Mutants have a reduced ability to close their stomata in response to drought and are affected in stomatal but not seed responsiveness to ABA. belongs to H+-APTase gene family, involved in proanthocyanidin biosynthesis, disturbs the vacuolar biogenesis and acidification process H(+)-ATPase 11 belongs to the P-type ATPase superfamily of cation-transporting A…
Wa8730a004g006840	1.11296	2.52473e-56	3.51998e-52	0.391	0.06
Wa8730a010g003880	1.09947	5.96948e-25	8.32266e-21	0.141	0.016	AT5G38970	ATBR6OX, BR6OX, BR6OX1, CYP85A1	Encodes a polypeptide involved in the C-6 oxidation of brassinosteroids. Heterologous expression of the protein in yeast conferred the ability to catalyze multiple reactions in which the C-6 position of 6-deoxocastasterone, 6-deoxotyphasterol, 3-dehydro-6-deoxoteasterone and 6-deoxoteasterone are oxidized.
Wa8730a010g000110	1.09689	1.27346e-61	1.77546e-57	0.49	0.086	AT3G16340 AT3G53480	ABCG29, ATPDR1, AtABCG29, PDR1 ABCG37, ATPDR9, PDR9, PIS1	Encodes a p-coumaryl alcohol exporter involved in lignin biosynthesis. Negative regulator of auxin polar transport inhibitors. ABCG37 regulates auxin distribution and homeostasis in roots by excluding IBA from the root apex, but does not act directly in basipetal transport. ABCG37 and ABCG36 act redundantly at outermost root plasma membranes and, transport IBA out of the cells.
Wa8730a008g003840	1.09474	4.73473e-28	6.60117e-24	0.521	0.183	AT4G19690 AT3G12750 AT2G30080 AT1G31260 AT2G32270 AT1G05300 AT2G04032	ATIRT1, IRT1 AtZIP1, ZIP1 ATZIP6, ZIP6 ZIP10 ZIP3 ZIP5 ZIP7	Fe(II) transport protein (IRT1) A member of Zrt- and Irt-related protein (ZIP) family. transcript is induced in response to zinc deficiency in the root. member of Fe(II) transporter isolog family. Gene expression is not regulated by iron, copper, or zinc deficiency or excess. member of Fe(II) transporter isolog family A member of Zrt- and Irt-related protein (ZIP) family. transcript is induced in…
Wa8730a019g000710	1.09393	3.29656e-17	4.59607e-13	0.63	0.326	AT3G55150 AT2G39380 AT3G09520 AT1G07725 AT5G59730 AT2G28650	ATEXO70H1, EXO70H1 ATEXO70H2, EXO70H2 ATEXO70H4, EXO70H4 ATEXO70H6, EXO70H6 ATEXO70H7, EXO70H7 ATEXO70H8, EXO70H8	A member of EXO70 gene family, putative exocyst subunits, conserved in land plants. Arabidopsis thaliana contains 23 putative EXO70 genes, which can be classified into eight clusters on the phylogenetic tree. A member of EXO70 gene family, putative exocyst subunits, conserved in land plants. Arabidopsis thaliana contains 23 putative EXO70 genes, which can be classified into eight clusters on the …
Wa8730a015g001790	1.08822	1.3585e-10	1.89401e-06	0.839	0.675	AT1G80920	AtJ8, AtToc12, DJC22, J8, Toc12	A nuclear encoded soluble protein found in the chloroplast stroma.
Wa8730a009g001780	1.08538	4.58269e-34	6.38918e-30	0.495	0.146	AT3G63110 AT5G19040 AT3G23630	ATIPT3, IPT3 ATIPT5, IPT5 ATIPT7, IPT7	Encodes cytokinin synthase involved in cytokinin biosynthesis. IPT3 subcellular localization is modulated by farnesylation- when farnesylated it is localized to the nucleus, otherwise to the chloroplast. Encodes cytokinin synthase. Encodes an isopentenyl transferase involved in cytokinin biosynthesis.
Wa8730a009g004350	1.08523	1.57664e-69	2.19815e-65	0.375	0.041	AT1G02520 AT3G62150 AT4G01820 AT2G47000	ABCB11, MDR8, PGP11 ABCB21, PGP21 ABCB3, MDR3, PGP3 ABCB4, ATPGP4, AtABCB4, MDR4, PGP4	Encodes an ATP-binding cassette (ABC) transporter. Expressed in the vascular tissue of primary stem. The mRNA is cell-to-cell mobile. Encodes a facultative transporter controlling auxin concentrations in plant cells. member of MDR subfamily Multidrug resistance P-glycoprotein (MDR/PGP) subfamily of ABC transporters. Functions in the basipetal redirection of auxin from the root tip. Exhibits apola…
Wa8730a001g006060	1.08018	9.16387e-41	1.27763e-36	0.703	0.255	AT3G10960	ATAZG1, AZG1	Encodes a homolog of the adenine-guanine-hypoxanthine transporter AzgA of Aspergillus nidulans. Function as a plant adenine-guanine transporter. Two closely related genes exist in Arabidopsis: AT3G10960 (Azg1) and AT5G50300 (Azg2).
Wa8730a004g008230	1.07538	3.9942e-39	5.56871e-35	0.609	0.204
Wa8730a001g011690	1.07318	5.62105e-78	7.83687e-74	0.464	0.059	AT4G31550 AT2G44745 AT2G30250 AT5G43290	ATWRKY11, WRKY11 AtWRKY12, WRKY12 ATWRKY25, WRKY25 ATWRKY49, WRKY49	member of WRKY Transcription Factor Group II-d negative regulator of basal resistance to Pseudomonas syringae. WRKY family transcription factor member of WRKY Transcription Factor Group I. Located in nucleus. Involved in response to various abiotic stresses - especially salt stress. member of WRKY Transcription Factor Group II-c
Wa8730a013g005740	1.06472	2.52957e-59	3.52673e-55	0.396	0.059	AT4G14365 AT3G23280	XBAT34 XBAT35	XB3 ortholog 4 in Arabidopsis thaliana Encodes a ubiquitin ligase that is a novel player in ethylene signaling involved in negatively regulating apical hook curvature, with alternative splicing controlling dual targeting to the nuclear and cytoplasmic compartments.
Wa8730a007g008020	1.06189	4.31275e-34	6.01283e-30	0.568	0.2	AT1G34370 AT5G22890	AtSTOP1, STOP1 STOP2	Encodes a putative nuclear Cys(2)His(2)-type zinc finger protein involved in H+ and Al3+ rhizotoxicity. In mutants exposed to aluminum stress, there is no induction of AtALMT1, an malate transporter known to be involved in the mediation of aluminum toxicity. An unique homologue of STOP1 (AT1G34370) in Arabidopsis genome. Transformation to the stop1-mutant activated several genes that are regulate…
Wa8730a003g003470	1.05117	1.51103e-81	2.10668e-77	0.354	0.029	AT5G38970 AT3G30180 AT5G36110	ATBR6OX, BR6OX, BR6OX1, CYP85A1 BR6OX2, CYP85A2 CYP716A1	Encodes a polypeptide involved in the C-6 oxidation of brassinosteroids. Heterologous expression of the protein in yeast conferred the ability to catalyze multiple reactions in which the C-6 position of 6-deoxocastasterone, 6-deoxotyphasterol, 3-dehydro-6-deoxoteasterone and 6-deoxoteasterone are oxidized. Encodes a cytochrome p450 enzyme that catalyzes the last reaction in the production of bras…
Wa8730a018g002470	1.04483	2.71278e-20	3.78215e-16	0.547	0.243	AT4G02330 AT5G27870 AT3G05620 AT5G49180 AT3G10720 AT1G02810 AT2G47550 AT5G04970 AT4G15980 AT3G06830	ATPMEPCRB, AtPME41, PME41	Encodes a pectin methylesterase that is sensitive to chilling stress and brassinosteroid regulation. Plant invertase/pectin methylesterase inhibitor superfamily Plant invertase/pectin methylesterase inhibitor superfamily Encodes a putative pectin methylesterase. The gene is preferentially expressed in floral buds. Plant invertase/pectin methylesterase inhibitor superfamily Plant invertase/pectin …
Wa8730a004g006820	1.03943	1.27598e-18	1.77897e-14	0.76	0.491	AT5G44130	FLA13	FASCICLIN-like arabinogalactan protein 13 precursor
Wa8730a005g000930	1.03886	1.30946e-20	1.82565e-16	0.786	0.487	AT1G15670 AT1G80440 AT2G21950	KFB01, KMD2 KFB20, KMD1 SKIP6	Encodes a member of a family of F-box proteins, called the KISS ME DEADLY (KMD) family, that targets type-B ARR proteins for degradation and is involved in the negative regulation of the cytokinin response. Also named as KFB1, a member of a group of Kelch repeat F-box proteins that negatively regulate phenylpropanoid biosynthesis by targeting the phenypropanoid biosynthesis enzyme phenylalanine a…
Wa8730a004g007780	1.03758	2.64889e-33	3.69308e-29	0.438	0.127	AT1G51800 AT4G29180 AT5G25930 AT3G08680 AT5G56790 AT1G49100 AT1G05700 AT1G26970	IOS1 RHS16	The gene encodes a putative member of the LRR-RLK protein family. Expressin and mutant analysis revealed that it contributes to the interaction between Arabidopsis and Hyaloperonospora arabidopsidis. and The mRNA is cell-to-cell mobile. root hair specific 16 Protein kinase family protein with leucine-rich repeat domain Leucine-rich repeat protein kinase family protein Protein kinase superfamily p…
Wa8730a012g000970	1.03698	1.60809e-32	2.24199e-28	0.672	0.275	AT1G22530 AT4G09160 AT1G72160	PATL2	PATELLIN 2 SEC14 cytosolic factor family protein / phosphoglyceride transfer family protein Sec14p-like phosphatidylinositol transfer family protein
Wa8730a002g000640	1.03573	9.36831e-24	1.30613e-19	0.698	0.358	AT3G53480	ABCG37, ATPDR9, PDR9, PIS1	Negative regulator of auxin polar transport inhibitors. ABCG37 regulates auxin distribution and homeostasis in roots by excluding IBA from the root apex, but does not act directly in basipetal transport. ABCG37 and ABCG36 act redundantly at outermost root plasma membranes and, transport IBA out of the cells.
Wa8730a005g001590	1.03564	5.31402e-12	7.40881e-08	0.448	0.232	AT5G12020 AT5G51440	HSP17.6II	17.6 kDa class II heat shock protein HSP20-like chaperones superfamily protein
Wa8730a015g000910	1.03402	4.13117e-22	5.75967e-18	0.344	0.1	AT4G31500 AT5G07990	ATR4, CYP83B1, RED1, RNT1, SUR2 CYP75B1, D501, TT7	Encodes an oxime-metabolizing enzyme in the biosynthetic pathway of glucosinolates. Is required for phytochrome signal transduction in red light. Mutation confers auxin overproduction. Required for flavonoid 3' hydroxylase activity.
Wa8730a007g009070	1.02967	1.54575e-18	2.15508e-14	0.953	0.768	AT2G27860 AT1G08200	AXS1 AXS2	Encodes UDP-d-apiose/UDP-d-xylose synthase that requires NAD+ for enzymatic activity and is strongly inhibited by UDP-d-galacturonate. Encodes a putative UDP-D-apiose/UPD-D-xylose synthetase.
Wa8730a016g001330	1.01912	5.55029e-32	7.73822e-28	0.661	0.267	AT1G22250 AT4G08910 AT1G78170
Wa8730a012g003440	1.0164	8.46953e-26	1.18082e-21	0.641	0.282	AT1G53830 AT3G14310 AT4G33220 AT5G49180 AT5G20860 AT3G43270	ATPME2, PME2 ATPME3, OZS2, PME3 ATPME44, PME44	encodes a pectin methylesterase encodes a pectin methylesterase, targeted by a cellulose binding protein (CBP) from the parasitic nematode Heterodera schachtii during parasitism. pectin methylesterase 44 Encodes a putative pectin methylesterase. The gene is preferentially expressed in floral buds. Plant invertase/pectin methylesterase inhibitor superfamily Plant invertase/pectin methylesterase in…
Wa8730a001g010580	1.01389	1.12296e-25	1.56563e-21	0.328	0.085	AT3G09590 AT4G33720 AT4G31470		CAP (Cysteine-rich secretory proteins, Antigen 5, and Pathogenesis-related 1 protein) superfamily protein CAP (Cysteine-rich secretory proteins, Antigen 5, and Pathogenesis-related 1 protein) superfamily protein CAP (Cysteine-rich secretory proteins, Antigen 5, and Pathogenesis-related 1 protein) superfamily protein
Wa8730a016g003850	1.0076	3.21508e-21	4.48247e-17	0.844	0.506	AT5G17330 AT1G65960 AT2G02010 AT3G17760	GAD, GAD1 GAD2 GAD4 GAD5	Encodes one of two isoforms of glutamate decarboxylase. glutamate decarboxylase (GAD2) glutamate decarboxylase 4 glutamate decarboxylase 5
Wa8730a015g004370	1.00489	1.91261e-17	2.66656e-13	0.719	0.486	AT3G01470 AT1G69780 AT2G22430	ATHB-1, ATHB1, HAT5, HB-1, HD-ZIP-1 ATHB13 ATHB6, HB6	Encodes a homeodomain leucine zipper class I (HD-Zip I) transcriptional activator involved in leaf development. Encodes a homeodomain leucine zipper class I (HD-Zip I) protein. Encodes a homeodomain leucine zipper class I (HD-Zip I) protein that is a target of the protein phosphatase ABI1 and regulates hormone responses in Arabidopsis.
Wa8730a019g003710	1.00038	1.26361e-32	1.76172e-28	0.51	0.169	AT1G09530 AT2G46970 AT4G02590	PAP3, PIF3, POC1 PIL1 UNE12	Transcription factor interacting with photoreceptors phyA and phyB. Forms a ternary complex in vitro with G-box element of the promoters of LHY, CCA1. Acts as a negative regulator of phyB signalling. It degrades rapidly after irradiation of dark grown seedlings in a process controlled by phytochromes. Does not play a significant role in controlling light input and function of the circadian clockw…

## Sheet: Dawn C7 DEGs
Dataset S8. Differentially Expressed Genes for Dawn Cluster 7
Genes showing significant differential expression (log2FC>1 & p_val_adj <0.05 & PCT1 > 10%) in the given cluster versus all other cells in the dawn dataset
PCT1: Percentage of cells within the cluster expressing the gene
PCT2: Percentage of cells outside the cluster expressing the gene
Gene	Ave. Log2 FC	p Value	p Value Adj.	PCT1	PCT2	Arabidopsis orthologues	Arabidopsis gene names	Arabidopsis gene description
Wa8730a002g003250	2.717	4.85016e-78	6.76209e-74	0.528	0.084	AT1G12090 AT4G00165 AT4G22460 AT2G45180 AT1G62510 AT5G46900 AT4G12510	ELP	extensin-like protein (ELP) Bifunctional inhibitor/lipid-transfer protein/seed storage 2S albumin superfamily protein Bifunctional inhibitor/lipid-transfer protein/seed storage 2S albumin superfamily protein Bifunctional inhibitor/lipid-transfer protein/seed storage 2S albumin superfamily protein Bifunctional inhibitor/lipid-transfer protein/seed storage 2S albumin superfamily protein Bifunctiona…
Wa8730a005g004040	2.67847	3.17556e-120	4.42737e-116	0.972	0.269	AT2G46330 AT3G61640 AT5G53250	AGP16, ATAGP16 AGP20, AtAGP20 AGP22, ATAGP22	Encodes arabinogalactan protein (AGP16). arabinogalactan protein 20 arabinogalactan protein 22
Wa8730a002g007210	2.0654	1.5184e-77	2.11696e-73	0.867	0.267	AT1G03630 AT5G54190 AT4G27440	POR, PORC PORA PORB	Encodes for a protein with protochlorophyllide oxidoreductase activity. The enzyme is NADPH- and light-dependent. light-dependent NADPH:protochlorophyllide oxidoreductase A light-dependent NADPH:protochlorophyllide oxidoreductase B
Wa8730a006g000470	2.05187	1.02946e-77	1.43527e-73	0.967	0.629	AT1G11860		Glycine cleavage T-protein family
Wa8730a001g010180	2.00856	9.63541e-130	1.34337e-125	0.483	0.029	AT4G22520		Bifunctional inhibitor/lipid-transfer protein/seed storage 2S albumin superfamily protein
Wa8730a006g007000	1.98015	4.53265e-117	6.31942e-113	0.489	0.037	AT1G72610 AT5G20630	ATGER1, GER1, GLP1 ATGER3, GER3, GLP3, GLP3A, GLP3B	germin-like protein (GLP1) Encodes a germin-like protein. Its transcripts are more abundant in RNA from leaves collected in the evening, suggesting some kind of circadian regulation.
Wa8730a014g005090	1.89686	3.60185e-99	5.02171e-95	0.85	0.187	AT1G12090 AT4G00165 AT4G22460 AT1G62510 AT2G45180 AT4G12510	ELP	extensin-like protein (ELP) Bifunctional inhibitor/lipid-transfer protein/seed storage 2S albumin superfamily protein Bifunctional inhibitor/lipid-transfer protein/seed storage 2S albumin superfamily protein Bifunctional inhibitor/lipid-transfer protein/seed storage 2S albumin superfamily protein Bifunctional inhibitor/lipid-transfer protein/seed storage 2S albumin superfamily protein Encodes a m…
Wa8730a012g005370	1.87049	4.80597e-85	6.70048e-81	1	0.886	AT3G47470	CAB4, LHCA4	Encodes a chlorophyll a/b-binding protein that is more similar to the PSI Cab proteins than the PSII cab proteins. The predicted protein is about 20 amino acids shorter than most known Cab proteins.
Wa8730a006g007010	1.84457	1.36722e-68	1.90618e-64	0.861	0.292	AT1G72610 AT5G20630	ATGER1, GER1, GLP1 ATGER3, GER3, GLP3, GLP3A, GLP3B	germin-like protein (GLP1) Encodes a germin-like protein. Its transcripts are more abundant in RNA from leaves collected in the evening, suggesting some kind of circadian regulation.
Wa8730a003g006960	1.76786	3.16342e-63	4.41044e-59	0.867	0.349	AT5G20720	ATCPN21, CHCPN10, CPN10, CPN20, CPN21	Encodes a chloroplast co-chaperonin with similarity to CPN21 from spinach, E.coli GroES.
Wa8730a017g000530	1.73503	1.78919e-80	2.49449e-76	0.989	0.793	AT2G35370 AT1G32470	GDCH	Encodes glycine decarboxylase complex H protein. Involved in photorespiration. Single hybrid motif superfamily protein
Wa8730a017g003860	1.71984	7.03445e-64	9.80743e-60	0.983	0.613	AT1G29930 AT5G54270	AB140, CAB1, CAB140, LHCB1.3 LHCB3, LHCB3*1	Subunit of light-harvesting complex II (LHCII),which absorbs light and transfers energy to the photosynthetic reaction center. Lhcb3 protein is a component of the main light harvesting chlorophyll a/b-protein complex of Photosystem II (LHC II).
Wa8730a002g000800	1.69516	1.07335e-63	1.49647e-59	0.933	0.489
Wa8730a010g003550	1.68084	1.18296e-77	1.64929e-73	1	0.987	AT1G67090 AT5G38410	RBCS1A RBCS3B	Encodes a member of the Rubisco small subunit (RBCS) multigene family: RBCS1A (At1g67090), RBCS1B (At5g38430), RBCS2B (At5g38420), and RBCS3B (At5g38410). Functions to yield sufficient Rubisco content for leaf photosynthetic capacity. Encodes a member of the Rubisco small subunit (RBCS) multigene family: RBCS1A (At1g67090), RBCS1B (At5g38430), RBCS2B (At5g38420), and RBCS3B (At5g38410). Functions…
Wa8730a007g001290	1.66482	3.09895e-57	4.32055e-53	0.956	0.681	AT1G10960	ATFD1, FD1	ferredoxin 1
Wa8730a019g003840	1.66414	1.07045e-59	1.49242e-55	0.906	0.476	AT3G17465	RPL3P	encodes a putative L3 ribosomal protein targeted to the plastid.
Wa8730a012g001170	1.64317	3.83413e-65	5.34554e-61	0.983	0.702	AT1G77060 AT1G21440		Phosphoenolpyruvate carboxylase family protein Phosphoenolpyruvate carboxylase family protein
Wa8730a002g002820	1.59429	5.32838e-68	7.42882e-64	0.978	0.777	AT3G60750 AT2G45290	AtTKL1, TKL1 TKL2	Transketolase Transketolase
Wa8730a006g005790	1.59284	6.23792e-66	8.69691e-62	0.994	0.916	AT1G15820	CP24, LHCB6	Lhcb6 protein (Lhcb6), light harvesting complex of photosystem II.
Wa8730a018g003740	1.59252	3.94189e-72	5.49578e-68	0.994	0.849	AT1G09340	CRB, CSP41B, HIP1.3	Encodes CHLOROPLAST RNA BINDING (CRB), a putative RNA-binding protein. CRB is important for the proper functioning of the chloroplast. Mutations in CRB also affects the circadian system, altering the expression of both oscillator and output genes.
Wa8730a009g003610	1.57958	3.88263e-54	5.41316e-50	0.889	0.431	AT5G13630	ABAR, CCH, CCH1, CHLH, GUN5	Encodes magnesium chelatase involved in plastid-to-nucleus signal transduction.
Wa8730a017g003730	1.57868	1.35111e-42	1.88372e-38	0.85	0.442	AT3G44890	RPL9	Plastid ribosomal protein CL9
Wa8730a016g002970	1.57081	8.82165e-61	1.22991e-56	0.944	0.52	AT3G25920	RPL15	encodes a plastid ribosomal protein CL15, a constituent of the large subunit of the ribosomal complex
Wa8730a005g007240	1.56761	5.64679e-64	7.87275e-60	0.994	0.884	AT1G67090 AT5G38430	RBCS1A RBCS1B	Encodes a member of the Rubisco small subunit (RBCS) multigene family: RBCS1A (At1g67090), RBCS1B (At5g38430), RBCS2B (At5g38420), and RBCS3B (At5g38410). Functions to yield sufficient Rubisco content for leaf photosynthetic capacity. Encodes a member of the Rubisco small subunit (RBCS) multigene family: RBCS1A (At1g67090), RBCS1B (At5g38430), RBCS2B (At5g38420), and RBCS3B (At5g38410).
Wa8730a010g003380	1.55613	5.11972e-61	7.13792e-57	0.928	0.494	AT1G67090 AT5G38410	RBCS1A RBCS3B	Encodes a member of the Rubisco small subunit (RBCS) multigene family: RBCS1A (At1g67090), RBCS1B (At5g38430), RBCS2B (At5g38420), and RBCS3B (At5g38410). Functions to yield sufficient Rubisco content for leaf photosynthetic capacity. Encodes a member of the Rubisco small subunit (RBCS) multigene family: RBCS1A (At1g67090), RBCS1B (At5g38430), RBCS2B (At5g38420), and RBCS3B (At5g38410). Functions…
Wa8730a017g002090	1.48364	1.4774e-52	2.05979e-48	0.906	0.519	AT5G51610		Ribosomal protein L11 family protein
Wa8730a014g000330	1.47903	5.16618e-54	7.20269e-50	0.939	0.593	AT1G74970	RPS9, TWN3	ribosomal protein S9, nuclear encoded component of the chloroplast ribosome
Wa8730a009g005910	1.47837	1.88592e-69	2.62935e-65	0.994	0.881	AT5G54270	LHCB3, LHCB3*1	Lhcb3 protein is a component of the main light harvesting chlorophyll a/b-protein complex of Photosystem II (LHC II).
Wa8730a008g001170	1.46399	3.83301e-68	5.34399e-64	0.983	0.835
Wa8730a004g004970	1.46109	5.10385e-63	7.11579e-59	0.983	0.84	AT1G29920 AT2G34430 AT1G61520 AT3G27690 AT5G54270	AB165, CAB2, LHCB1.1 LHB1B1, LHCB1.4 LHCA3 LHCB2, LHCB2.3, LHCB2.4 LHCB3, LHCB3*1	Encodes lhcb1.1 a component of the LHCIIb light harvesting complex associated with photosystem II. Photosystem II type I chlorophyll a/b-binding protein PSI type III chlorophyll a/b-binding protein (Lhca3*1) Encodes Lhcb2.4. Belongs to the Lhc super-gene family encodes the light-harvesting chlorophyll a/b-binding (LHC) proteins that constitute the antenna system of the photosynthetic apparatus. L…
Wa8730a007g002830	1.45371	3.26082e-73	4.54624e-69	0.994	0.938
Wa8730a013g001180	1.44806	1.22256e-52	1.70449e-48	0.811	0.309	AT4G17560 AT5G47190		Ribosomal protein L19 family protein Ribosomal protein L19 family protein
Wa8730a012g000280	1.44799	4.01668e-69	5.60005e-65	0.994	0.896	AT5G06290 AT3G11630	2-Cys, 2CPB	Encodes a 2-Cys peroxiredoxin (2-Cys PrxB) that contains two catalytic Cys residues. Encodes a 2-Cys peroxiredoxin (2-Cys PrxA) that contains two catalytic Cys residues.
Wa8730a015g001650	1.44671	5.58551e-50	7.78732e-46	0.944	0.69	AT2G24090	PRPL35	Ribosomal protein L35
Wa8730a008g004450	1.41204	2.83941e-81	3.95871e-77	1	0.975	AT4G21280 AT4G05180	PSBQ, PSBQ-1, PSBQA PSBQ, PSBQ-2, PSII-Q	Encodes the PsbQ subunit of the oxygen evolving complex of photosystem II. Encodes the PsbQ subunit of the oxygen evolving complex of photosystem II.
Wa8730a020g002810	1.39794	2.46277e-57	3.4336e-53	0.944	0.584
Wa8730a010g003540	1.39525	6.79872e-48	9.47878e-44	0.811	0.354	AT1G67090 AT5G38410	RBCS1A RBCS3B	Encodes a member of the Rubisco small subunit (RBCS) multigene family: RBCS1A (At1g67090), RBCS1B (At5g38430), RBCS2B (At5g38420), and RBCS3B (At5g38410). Functions to yield sufficient Rubisco content for leaf photosynthetic capacity. Encodes a member of the Rubisco small subunit (RBCS) multigene family: RBCS1A (At1g67090), RBCS1B (At5g38430), RBCS2B (At5g38420), and RBCS3B (At5g38410). Functions…
Wa8730a018g002910	1.38856	2.62927e-63	3.66572e-59	0.983	0.7	AT3G63140	CSP41A	Encodes a protein with ribonuclease activity that is involved in plastid rRNA maturation.
Wa8730a001g008310	1.38519	7.2612e-77	1.01236e-72	1	0.916	AT1G15820	CP24, LHCB6	Lhcb6 protein (Lhcb6), light harvesting complex of photosystem II.
Wa8730a012g003720	1.37325	7.72721e-75	1.07733e-70	1	0.925
Wa8730a009g000670	1.35249	1.2314e-73	1.71682e-69	1	0.974	AT3G54890 AT3G08940	LHCA1 LHCB4.2	Encodes a component of the light harvesting complex associated with photosystem I. Lhcb4.2 protein (Lhcb4.2, protein involved in the light harvesting complex of photosystem II
Wa8730a009g001930	1.32808	2.28608e-43	3.18726e-39	0.772	0.33	AT3G63490	EMB3126, PRPL1	Ribosomal protein L1p/L10e family
Wa8730a008g005310	1.32273	1.51867e-48	2.11733e-44	0.861	0.407	AT1G05190	emb2394	Encodes the plastid 50S ribosomal protein L6.
Wa8730a012g000890	1.32042	8.78322e-45	1.22456e-40	0.861	0.457
Wa8730a019g001630	1.31646	4.8255e-50	6.72771e-46	0.95	0.596
Wa8730a009g000030	1.31597	1.86285e-40	2.59719e-36	0.944	0.632	AT5G05730 AT2G29690 AT2G38140 AT3G55870	AMT1, ASA1, JDL1, TRP5, WEI2 ASA2, ATHANSYNAB PSRP4	ASA1 encodes the alpha subunit of anthranilate synthase, which catalyzes the rate-limiting step of tryptophan synthesis. ASA1 is induced by ethylene, and forms a link between ethylene signalling and auxin synthesis in roots. Encode a functional anthranilate synthase protein. Expressed at a constitutive basal level. Expression was not induced by wounding nor bacterial pathogen infiltration. Involv…
Wa8730a010g003390	1.31546	2.58141e-69	3.599e-65	1	0.955	AT1G67090 AT5G38410	RBCS1A RBCS3B	Encodes a member of the Rubisco small subunit (RBCS) multigene family: RBCS1A (At1g67090), RBCS1B (At5g38430), RBCS2B (At5g38420), and RBCS3B (At5g38410). Functions to yield sufficient Rubisco content for leaf photosynthetic capacity. Encodes a member of the Rubisco small subunit (RBCS) multigene family: RBCS1A (At1g67090), RBCS1B (At5g38430), RBCS2B (At5g38420), and RBCS3B (At5g38410). Functions…
Wa8730a012g002380	1.29206	1.1254e-29	1.56903e-25	0.811	0.428	AT5G13120	ATCYP20-2, CYP20-2, Pnsl5	Encodes a lumenal cyclophilin with peptidyl-prolyl isomerase activity that is associated with the NAD(P)H dehydrogenase complex in stromal regions of the thylakoid membrane. It is likely to be important for the accumulation of the hydrophobic domain of the NAD(P)H dehydrogenase complex. This complex is associated with PSI and is responsible for the reduction of plastoquinone.
Wa8730a007g002690	1.29122	1.98187e-78	2.76312e-74	1	0.982	AT4G12800	PSAL	Encodes subunit L of photosystem I reaction center.
Wa8730a012g003180	1.28571	1.20902e-47	1.68561e-43	0.628	0.184	AT5G63310	ATNDPK2, NDPK, NDPK1A, NDPK2	Maintains intracellular dNTP levels except ATP. Plays a role in response to oxidative stress and UV. Involved in phytochrome-mediated light signaling. Participates in auxin-regulated processes, partly through the modulation of auxin transport. H-bonding with His-197 inside the nucleotide-binding pocket is critical for NDPK2 functioning.
Wa8730a012g003620	1.28287	6.13945e-39	8.55963e-35	0.822	0.446	AT3G26060	ATPRX, PRXQ	encodes periredoxin Q which decomposes peroxides and plays a role in the protection of the photosynthetic apparatus
Wa8730a009g004480	1.27734	2.34627e-74	3.27117e-70	1	0.941
Wa8730a001g004620	1.27577	2.28914e-65	3.19152e-61	0.989	0.857	AT3G56940	ACSF, CHL27, CRD1	Encodes a putative ZIP protein with varying mRNA accumulation in leaves, stems and roots. Has a consensus carboxylate-bridged di-iron binding site.
Wa8730a001g001580	1.27557	6.87745e-57	9.58854e-53	0.989	0.861	AT3G17820 AT1G66200 AT1G48470	ATGSKB6, GLN1.3, GLN1 3 ATGSR2, GLN1 2, GSR2 GLN1 5	encodes a cytosolic glutamine synthetase, the enzyme has low affinity with substrate ammonium encodes a cytosolic glutamate synthetase, this enzyme has low affinity with substrate ammonium Encodes cytosolic glutamine synthase isozyme. Expression of mRNA is not detectable in roots.
Wa8730a014g001290	1.26939	5.17824e-48	7.21951e-44	0.778	0.319	AT3G13120		Ribosomal protein S10p/S20e family protein
Wa8730a007g005080	1.26347	8.23755e-82	1.14848e-77	1	0.983	AT4G10340	LHCB5	photosystem II encoding the light-harvesting chlorophyll a/b binding protein CP26 of the antenna system of the photosynthetic apparatus
Wa8730a019g003450	1.26276	6.283e-39	8.75976e-35	0.733	0.306	AT3G17240 AT4G16155	mtLPD2	lipoamide dehydrogenase precursor dihydrolipoyl dehydrogenases
Wa8730a002g010770	1.24995	3.67113e-46	5.11829e-42	0.9	0.573
Wa8730a009g007000	1.23757	2.16539e-67	3.01899e-63	0.994	0.908
Wa8730a018g000310	1.23613	3.56742e-43	4.9737e-39	0.889	0.536	AT3G46780	PTAC16	plastid transcriptionally active 16
Wa8730a010g005830	1.2357	2.33073e-59	3.2495e-55	0.7	0.182	AT5G15350 AT4G12880	AtENODL17, ENODL17 AtENODL19, ENODL19	early nodulin-like protein 17 early nodulin-like protein 19
Wa8730a017g003110	1.22201	8.81685e-42	1.22925e-37	0.889	0.541
Wa8730a001g002450	1.22128	8.84716e-48	1.23347e-43	0.8	0.325
Wa8730a004g000290	1.22025	2.8085e-40	3.91561e-36	0.811	0.365
Wa8730a012g002430	1.2201	9.20972e-35	1.28402e-30	0.883	0.583	AT5G40950	RPL27	ribosomal protein large subunit 27
Wa8730a001g008330	1.20678	3.77137e-59	5.25804e-55	0.983	0.933	AT1G55670	PSAG	Encodes subunit G of photosystem I, an 11-kDa membrane protein that plays an important role in electron transport between plastocyanin and PSI and is involved in the stability of the PSI complex. PSI-G subunit is bound to PSI-B and is in contact with Lhca1. The protein inserts into thylakoids by a direct or spontaneous pathway that does not involve the activities of any known chloroplast protein-…
Wa8730a005g007110	1.19782	4.99667e-41	6.96636e-37	0.783	0.347
Wa8730a016g002430	1.19618	3.07222e-37	4.28329e-33	0.933	0.639	AT1G77750		Ribosomal protein S13/S18 family
Wa8730a005g005670	1.18853	4.394e-36	6.12611e-32	0.911	0.612	AT1G78630	emb1473	Ribosomal protein L13 family protein
Wa8730a004g003700	1.17376	6.98065e-64	9.73242e-60	1	0.982	AT1G30380	PSAK	Encodes subunit K of photosystem I reaction center.
Wa8730a018g002280	1.16416	8.37858e-32	1.16814e-27	0.789	0.392	AT2G47400 AT3G62410	CP12, CP12-1 CP12, CP12-2	CP12-1 encodes a small peptide found in the chloroplast stroma. It belongs to the CP12 gene family thought to be involved in the formation of a supramolecular complex with glyceraldehyde-3-phosphate dehydrogenase (GAPDH) and phosphoribulokinase (PRK) embedded in the Calvin cycle. CP12-2 encodes a small peptide found in the chloroplast stroma. It belongs to the CP12 gene family thought to be invol…
Wa8730a007g007190	1.16149	5.86174e-36	8.17244e-32	0.928	0.623	AT1G35680	RPL21C	Encodes a chloroplast ribosomal protein L21 that is required for chloroplast development and embryogenesis. The mRNA is cell-to-cell mobile.
Wa8730a012g004570	1.15864	2.03051e-40	2.83094e-36	0.778	0.357	AT4G39970		Haloacid dehalogenase-like hydrolase (HAD) superfamily protein
Wa8730a009g000130	1.14955	1.65017e-39	2.30066e-35	0.878	0.504	AT3G54890 AT5G01530 AT3G08940 AT2G40100	LHCA1 LHCB4.1 LHCB4.2 LHCB4.3	Encodes a component of the light harvesting complex associated with photosystem I. light harvesting complex photosystem II Lhcb4.2 protein (Lhcb4.2, protein involved in the light harvesting complex of photosystem II Lhcb4:3 protein (Lhcb4.3, light harvesting complex of photosystem II
Wa8730a004g000930	1.14822	1.09642e-41	1.52863e-37	0.7	0.256	AT1G23740	AOR	AOR is an alkenal/one oxidoreductase that acts on compounds with unsaturated alpha,beta-carbonyls. The activity of this enzyme with a number of substrates, including acrolein and 3-buten-2-one, was demonstrated in vitro using a truncated form of the protein that lacked approximately 80 of the first amino acids. This protein appears to localize to the chloroplast where it likely helps to maintain …
Wa8730a004g000520	1.13786	7.84635e-39	1.09394e-34	0.789	0.361	AT2G34430	LHB1B1, LHCB1.4	Photosystem II type I chlorophyll a/b-binding protein
Wa8730a005g008900	1.13708	5.25523e-40	7.32684e-36	0.922	0.696	AT1G75350	emb2184	Ribosomal protein L31
Wa8730a010g001510	1.13497	1.70159e-69	2.37236e-65	1	0.982	AT3G16140 AT1G52230	PSAH-1 PSAH-2, PSAH2, PSI-H	Encodes subunit H of photosystem I reaction center subunit VI. Phosphorylation of this protein is dependent on calcium. The mRNA is cell-to-cell mobile.
Wa8730a015g005280	1.12776	1.20126e-31	1.6748e-27	0.939	0.689
Wa8730a001g012420	1.12098	3.92932e-38	5.47826e-34	0.889	0.484	AT1G07320	EMB2784, PRPL4, RPL4	encodes a plastid ribosomal protein L4
Wa8730a003g004410	1.11826	2.31919e-34	3.23341e-30	0.911	0.611
Wa8730a009g002620	1.11506	8.77989e-09	0.000122409	0.989	0.983
Wa8730a012g000440	1.11433	4.55345e-58	6.34842e-54	1	0.991
Wa8730a014g004100	1.11286	3.38141e-35	4.71436e-31	0.883	0.541
Wa8730a008g000790	1.11006	9.08229e-34	1.26625e-29	0.85	0.474
Wa8730a004g004220	1.10884	1.08182e-35	1.50827e-31	0.922	0.69	AT2G46820	CURT1B, PSAP, PSI-P, PTAC8, TMP14	Encodes the P subunit of Photosystem I. About 25% of the TMP14 pool appeared to be phosphorylated, and this ratio is not affected by light. Contains seven phosphorylation sites on threonine residue and chloroplast targeting signal. Located in the proximity of PSI-L, -H and -O subunits.
Wa8730a014g002900	1.10605	1.78248e-41	2.48514e-37	0.817	0.367	AT4G09010	APX4, TL29	Encodes a protein that was initially believed to act as a microsomal ascorbate peroxidase APX4 but to date, no evidence of enzymatic activity has been found.
Wa8730a004g002070	1.10084	2.37889e-35	3.31665e-31	0.772	0.36	AT4G01050	TROL	hydroxyproline-rich glycoprotein family protein, contains a rhodanese homology domain. Required for anchoring the FNR flavoenzyme to the thylakoid membranes and sustaining high efficiency photosynthetic linear electron flow.
Wa8730a019g002160	1.09806	3.44909e-34	4.80872e-30	0.711	0.298	AT2G47590	PHR2	photolyase/blue light photoreceptor PHR2 (PHR2) mRNA,
Wa8730a009g001020	1.07131	1.85844e-42	2.59103e-38	0.606	0.188	AT5G13510	EMB3136	Ribosomal protein L10 family protein
Wa8730a005g004940	1.07108	1.30982e-27	1.82615e-23	0.85	0.554	AT4G18480 AT5G45930	CH-42, CH42, CHL11, CHLI-1, CHLI1 CHL, CHLI-2, CHLI2	Encodes the CHLI subunit of magnesium chelatase which is required for chlorophyll biosynthesis. All four cysteine residues of the protein form two disulfide bonds (Cys102-Cys193 and Cys354-Cys396) under oxidized conditions but are fully reduced by reduction. It was suggested that the redox state of CHLI is regulated in vivo by the change of the redox environment in the chloroplasts probably via t…
Wa8730a009g000060	1.06278	6.94809e-38	9.68703e-34	0.6	0.195
Wa8730a006g006970	1.05941	6.80793e-39	9.49162e-35	0.911	0.649	AT2G06520	PSBX	Encodes a protein with sequence similarity to the spinach photosystem II subunit PsbX.
Wa8730a008g001270	1.05926	5.85669e-43	8.1654e-39	0.983	0.866	AT4G02770 AT1G03130	PSAD-1 PSAD-2	Encodes a protein predicted by sequence similarity with spinach PsaD to be photosystem I reaction center subunit II (PsaD1) Encodes a protein predicted by sequence similarity with spinach PsaD to be photosystem I reaction center subunit II (PsaD2)
Wa8730a010g006000	1.05578	3.44803e-35	4.80725e-31	0.789	0.388
Wa8730a007g006480	1.0515	5.24066e-52	7.30653e-48	1	0.988	AT5G64040	PSAN	Encodes the only subunit of photosystem I located entirely in the thylakoid lumen. May be involved in the interaction between plastocyanin and the photosystem I complex.
Wa8730a017g003930	1.04966	5.72012e-33	7.975e-29	0.761	0.339	AT1G29930 AT5G54270	AB140, CAB1, CAB140, LHCB1.3 LHCB3, LHCB3*1	Subunit of light-harvesting complex II (LHCII),which absorbs light and transfers energy to the photosynthetic reaction center. Lhcb3 protein is a component of the main light harvesting chlorophyll a/b-protein complex of Photosystem II (LHC II).
Wa8730a005g000700	1.03868	2.04982e-33	2.85785e-29	0.85	0.463	AT1G80380		encodes a glycerate kinase which catalyzes the last step of photorespiration C2 cycle.
Wa8730a009g000280	1.03586	2.99031e-41	4.16909e-37	0.95	0.711	AT3G54050 AT3G55800	HCEF1 SBPASE	Encodes HCEF1 (High Cyclic Electron Flow 1). Mutant phenotype: constitutively elevated electron flow (CEFI). Encodes the chloroplast enzyme sedoheptulose-1,7-bisphosphatase (SBPase), involved in the carbon reduction of the Calvin cycle. Increase in SBPase activity in transgenic lines accumulate up to 50% more sucrose and starch than wild-type.
Wa8730a014g003370	1.03402	6.14369e-33	8.56553e-29	0.733	0.343	AT5G46800 AT1G14560	BOU CoAc1	Seedling lethal mutation Mitochondrial Carnitine Acyl Carrier-Like Protein Encodes a mitochondrial CoA transporter.
Wa8730a007g008920	1.03251	7.6282e-35	1.06352e-30	0.778	0.366	AT3G52960		Thioredoxin superfamily protein
Wa8730a005g008430	1.03213	2.49486e-32	3.47833e-28	0.95	0.61	AT1G67090 AT5G38430	RBCS1A RBCS1B	Encodes a member of the Rubisco small subunit (RBCS) multigene family: RBCS1A (At1g67090), RBCS1B (At5g38430), RBCS2B (At5g38420), and RBCS3B (At5g38410). Functions to yield sufficient Rubisco content for leaf photosynthetic capacity. Encodes a member of the Rubisco small subunit (RBCS) multigene family: RBCS1A (At1g67090), RBCS1B (At5g38430), RBCS2B (At5g38420), and RBCS3B (At5g38410).
Wa8730a006g003640	1.03206	3.4381e-29	4.79341e-25	0.95	0.76	AT1G54630	ACP3	encodes an acyl carrier protein expressed in leaves, roots, and dry seeds. Gene expression is not regulated by light.
Wa8730a004g003910	1.02971	1.38931e-58	1.93697e-54	1	0.984	AT1G06680	OE23, OEE2, PSBP-1, PSII-P	Encodes a 23 kD extrinsic protein that is part of photosystem II and participates in the regulation of oxygen evolution.
Wa8730a010g002880	1.01475	4.81844e-34	6.71788e-30	0.711	0.3	AT3G27830 AT3G06040 AT1G70190	RPL12, RPL12-A	50S ribosomal protein L12-A Ribosomal protein L12/ ATP-dependent Clp protease adaptor protein ClpS family protein Ribosomal protein L7/L12, oligomerisation Ribosomal protein L7/L12, C-terminal/adaptor protein ClpS-like
Wa8730a006g005330	1.01001	7.0652e-63	9.8503e-59	1	0.993	AT1G12900 AT1G42970 AT3G04120	GAPA-2 GAPB GAPC, GAPC-1, GAPC1	glyceraldehyde 3-phosphate dehydrogenase A subunit 2 Encodes chloroplast localized glyceraldehyde-3-phosphate dehydrogenase that can use both NADH and NADPH to reduce 1,3-diphosphate glycerate. It forms A2B2 heterotetramers with GapA forms of the GADPH enzyme. These complexes are active in the light under reducing conditions, but show reduced NADPH-dependent activity in response to oxidized thior…
Wa8730a016g004490	1.0088	9.07556e-33	1.26531e-28	0.817	0.51	AT1G19150	LHCA2*1, Lhca6	PSI type II chlorophyll a/b-binding protein (Lhca2*1) mRNA,
Wa8730a006g006580	1.00678	1.7372e-50	2.422e-46	1	0.981
Wa8730a004g005140	1.00614	3.74231e-33	5.21753e-29	0.911	0.688	AT2G20890	PSB29, THF1	Chloroplast-localized Thylakoid formation1 gene product involved in vesicle-mediated formation of thylakoid membranes. Thf1 antisense lines contain abnormal chloroplasts early in leaf development (chloroplasts have loosely stacked thylakoid membranes). Expression was induced in the light and decreased under dark conditions. G-alpha interaction partner that functions downstream of the plasma membr…
Wa8730a012g000050	1.00273	1.94655e-31	2.71388e-27	0.828	0.468	AT3G52930 AT2G36460	AtFBA8, FBA8 FBA6	Aldolase superfamily protein Aldolase superfamily protein
Wa8730a011g003800	1.00135	4.21607e-55	5.87804e-51	1	0.941	AT4G32260	PDE334	ATPase, F0 complex, subunit B/B', bacterial/chloroplast
Wa8730a006g005430	1.00082	6.01529e-34	8.38652e-30	0.85	0.48

## Sheet: C0 GO
Dataset S8. Enriched GO terms for Differentially Expressed Genes for Dawn Cluster 0
GO	Name	Ratio in Study	Ratio in Pop.	p Value	Depth	Study Count	p Value (BH-FDR)	Study Items
GO:0046519	sphingoid metabolic process	9/73	27/13944	7.70956e-15	7	9	5.33116e-11	Wa8730a006g003620, Wa8730a009g003160, Wa8730a009g003220, Wa8730a014g001120, Wa8730a014g001670, Wa8730a014g002160, Wa8730a014g002170, Wa8730a014g002180, Wa8730a016g000390
GO:0030148	sphingolipid biosynthetic process	9/73	36/13944	1.49191e-13	7	9	5.15828e-10	Wa8730a006g003620, Wa8730a009g003160, Wa8730a009g003220, Wa8730a014g001120, Wa8730a014g001670, Wa8730a014g002160, Wa8730a014g002170, Wa8730a014g002180, Wa8730a016g000390
GO:0046520	sphingoid biosynthetic process	7/73	15/13944	4.9947e-13	8	7	1.15128e-09	Wa8730a006g003620, Wa8730a009g003160, Wa8730a009g003220, Wa8730a014g001670, Wa8730a014g002160, Wa8730a014g002170, Wa8730a014g002180
GO:0097164	ammonium ion metabolic process	9/73	42/13944	6.89258e-13	3	9	1.19156e-09	Wa8730a006g003620, Wa8730a009g003160, Wa8730a009g003220, Wa8730a014g001120, Wa8730a014g001670, Wa8730a014g002160, Wa8730a014g002170, Wa8730a014g002180, Wa8730a016g000390
GO:0006665	sphingolipid metabolic process	9/73	44/13944	1.08682e-12	6	9	1.50307e-09	Wa8730a006g003620, Wa8730a009g003160, Wa8730a009g003220, Wa8730a014g001120, Wa8730a014g001670, Wa8730a014g002160, Wa8730a014g002170, Wa8730a014g002180, Wa8730a016g000390
GO:0046467	membrane lipid biosynthetic process	9/73	66/13944	5.17969e-11	6	9	5.96959e-08	Wa8730a006g003620, Wa8730a009g003160, Wa8730a009g003220, Wa8730a014g001120, Wa8730a014g001670, Wa8730a014g002160, Wa8730a014g002170, Wa8730a014g002180, Wa8730a016g000390
GO:0009640	photomorphogenesis	8/73	47/13944	1.01611e-10	6	8	1.00377e-07	Wa8730a006g003620, Wa8730a009g003160, Wa8730a009g003220, Wa8730a014g001670, Wa8730a014g002160, Wa8730a014g002170, Wa8730a014g002180, Wa8730a020g000340
GO:0006643	membrane lipid metabolic process	9/73	73/13944	1.31967e-10	5	9	1.14069e-07	Wa8730a006g003620, Wa8730a009g003160, Wa8730a009g003220, Wa8730a014g001120, Wa8730a014g001670, Wa8730a014g002160, Wa8730a014g002170, Wa8730a014g002180, Wa8730a016g000390
GO:0009639	response to red or far red light	8/73	97/13944	3.7934e-08	5	8	2.91459e-05	Wa8730a006g003620, Wa8730a009g003160, Wa8730a009g003220, Wa8730a014g001670, Wa8730a014g002160, Wa8730a014g002170, Wa8730a014g002180, Wa8730a020g000340
GO:0008610	lipid biosynthetic process	10/73	259/13944	9.12911e-07	4	10	0.000631278	Wa8730a005g001430, Wa8730a006g003620, Wa8730a009g003160, Wa8730a009g003220, Wa8730a014g001120, Wa8730a014g001670, Wa8730a014g002160, Wa8730a014g002170, Wa8730a014g002180, Wa8730a016g000390
GO:0044255	cellular lipid metabolic process	10/73	378/13944	2.582e-05	4	10	0.0162314	Wa8730a005g001430, Wa8730a006g003620, Wa8730a009g003160, Wa8730a009g003220, Wa8730a014g001120, Wa8730a014g001670, Wa8730a014g002160, Wa8730a014g002170, Wa8730a014g002180, Wa8730a016g000390
GO:0006629	lipid metabolic process	10/73	428/13944	7.36654e-05	3	10	0.0424497	Wa8730a005g001430, Wa8730a006g003620, Wa8730a009g003160, Wa8730a009g003220, Wa8730a014g001120, Wa8730a014g001670, Wa8730a014g002160, Wa8730a014g002170, Wa8730a014g002180, Wa8730a016g000390
GO:0031090	organelle membrane	17/73	847/13944	1.25162e-06	3	17	0.000960482	Wa8730a001g007510, Wa8730a004g001070, Wa8730a006g003620, Wa8730a007g000220, Wa8730a009g000440, Wa8730a009g003160, Wa8730a009g003220, Wa8730a010g000090, Wa8730a013g005830, Wa8730a014g001120, Wa8730a014g001670, Wa8730a014g002160, Wa8730a014g002170, Wa8730a014g002180, Wa8730a015g002300, Wa8730a016g000390, Wa8730a019g001950
GO:0005789	endoplasmic reticulum membrane	9/73	232/13944	3.22006e-06	4	9	0.000960482	Wa8730a006g003620, Wa8730a009g003160, Wa8730a009g003220, Wa8730a014g001120, Wa8730a014g001670, Wa8730a014g002160, Wa8730a014g002170, Wa8730a014g002180, Wa8730a016g000390
GO:0042175	nuclear outer membrane-endoplasmic reticulum membrane network	9/73	233/13944	3.33553e-06	3	9	0.000960482	Wa8730a006g003620, Wa8730a009g003160, Wa8730a009g003220, Wa8730a014g001120, Wa8730a014g001670, Wa8730a014g002160, Wa8730a014g002170, Wa8730a014g002180, Wa8730a016g000390
GO:0098827	endoplasmic reticulum subcompartment	9/73	235/13944	3.57721e-06	3	9	0.000960482	Wa8730a006g003620, Wa8730a009g003160, Wa8730a009g003220, Wa8730a014g001120, Wa8730a014g001670, Wa8730a014g002160, Wa8730a014g002170, Wa8730a014g002180, Wa8730a016g000390
GO:0016020	membrane	25/73	2296/13944	0.000188157	2	25	0.0404161	Wa8730a001g007510, Wa8730a001g007820, Wa8730a004g001070, Wa8730a004g006820, Wa8730a006g002120, Wa8730a006g003620, Wa8730a007g000220, Wa8730a008g003840, Wa8730a009g000440, Wa8730a009g003160, Wa8730a009g003220, Wa8730a009g003530, Wa8730a010g000090, Wa8730a012g004900, Wa8730a013g005830, Wa8730a014g001120, Wa8730a014g001670, Wa8730a014g002160, Wa8730a014g002170, Wa8730a014g002180, Wa8730a015g000910, …
GO:0042284	sphingolipid delta-4 desaturase activity	6/73	11/13944	7.55422e-12	4	6	1.78657e-08	Wa8730a009g003160, Wa8730a009g003220, Wa8730a014g001670, Wa8730a014g002160, Wa8730a014g002170, Wa8730a014g002180
GO:0016705	oxidoreductase activity, acting on paired donors, with incorporation or reduction of molecular oxygen	8/73	91/13944	2.28711e-08	3	8	2.70451e-05	Wa8730a005g001430, Wa8730a009g003160, Wa8730a009g003220, Wa8730a014g001670, Wa8730a014g002160, Wa8730a014g002170, Wa8730a014g002180, Wa8730a015g000910
GO:0016491	oxidoreductase activity	14/73	465/13944	1.05561e-07	2	14	8.32172e-05	Wa8730a001g007090, Wa8730a005g001430, Wa8730a006g004140, Wa8730a009g003160, Wa8730a009g003220, Wa8730a013g005820, Wa8730a013g005830, Wa8730a014g001120, Wa8730a014g001670, Wa8730a014g002160, Wa8730a014g002170, Wa8730a014g002180, Wa8730a015g000910, Wa8730a016g000390

## Sheet: C1 GO
Dataset S8. Enriched GO terms for Differentially Expressed Genes for Dawn Cluster 1
GO	Name	Ratio in Study	Ratio in Pop.	p Value	Depth	Study Count	p Value (BH-FDR)	Study Items
GO:0080167	response to karrikin	9/117	68/13944	4.92e-09	3	9	1.51e-05	Wa8730a003g002320, Wa8730a006g005060, Wa8730a007g008930, Wa8730a009g001620, Wa8730a009g001630, Wa8730a012g005240, Wa8730a015g004980, Wa8730a017g004030, Wa8730a018g000750
GO:0010025	wax biosynthetic process	8/117	48/13944	5.5e-09	5	8	1.51e-05	Wa8730a009g000590, Wa8730a011g004850, Wa8730a011g005590, Wa8730a012g005240, Wa8730a014g005820, Wa8730a015g005080, Wa8730a015g005520, Wa8730a016g003000
GO:0010166	wax metabolic process	8/117	49/13944	6.53e-09	4	8	1.51e-05	Wa8730a009g000590, Wa8730a011g004850, Wa8730a011g005590, Wa8730a012g005240, Wa8730a014g005820, Wa8730a015g005080, Wa8730a015g005520, Wa8730a016g003000
GO:1901570	fatty acid derivative biosynthetic process	8/117	51/13944	9.09e-09	4	8	1.57e-05	Wa8730a009g000590, Wa8730a011g004850, Wa8730a011g005590, Wa8730a012g005240, Wa8730a014g005820, Wa8730a015g005080, Wa8730a015g005520, Wa8730a016g003000
GO:1901568	fatty acid derivative metabolic process	8/117	61/13944	3.92e-08	3	8	5.43e-05	Wa8730a009g000590, Wa8730a011g004850, Wa8730a011g005590, Wa8730a012g005240, Wa8730a014g005820, Wa8730a015g005080, Wa8730a015g005520, Wa8730a016g003000
GO:0006629	lipid metabolic process	15/117	428/13944	2.86e-06	3	15	0.003285	Wa8730a006g004490, Wa8730a008g000260, Wa8730a008g002540, Wa8730a009g000590, Wa8730a010g004870, Wa8730a011g004850, Wa8730a011g005590, Wa8730a013g002080, Wa8730a015g005080, Wa8730a015g005520, Wa8730a016g001110, Wa8730a016g002030, Wa8730a017g002740, Wa8730a018g003530, Wa8730a020g002750
GO:0044255	cellular lipid metabolic process	14/117	378/13944	3.33e-06	4	14	0.003285	Wa8730a006g004490, Wa8730a008g000260, Wa8730a008g002540, Wa8730a009g000590, Wa8730a010g004870, Wa8730a011g004850, Wa8730a013g002080, Wa8730a015g005080, Wa8730a015g005520, Wa8730a016g001110, Wa8730a016g002030, Wa8730a017g002740, Wa8730a018g003530, Wa8730a020g002750
GO:0006631	fatty acid metabolic process	8/117	113/13944	4.75e-06	7	8	0.004103	Wa8730a006g004490, Wa8730a008g002540, Wa8730a009g000590, Wa8730a010g004870, Wa8730a016g001110, Wa8730a016g002030, Wa8730a018g003530, Wa8730a020g002750
GO:0006633	fatty acid biosynthetic process	6/117	56/13944	7.07e-06	8	6	0.005436	Wa8730a006g004490, Wa8730a008g002540, Wa8730a009g000590, Wa8730a016g001110, Wa8730a018g003530, Wa8730a020g002750
GO:0042761	very long-chain fatty acid biosynthetic process	4/117	18/13944	1.32e-05	9	4	0.009097	Wa8730a006g004490, Wa8730a008g002540, Wa8730a009g000590, Wa8730a020g002750
GO:0009628	response to abiotic stimulus	23/117	1086/13944	2.96e-05	2	23	0.018019	Wa8730a001g003580, Wa8730a001g011890, Wa8730a002g003100, Wa8730a002g009950, Wa8730a003g002320, Wa8730a003g005060, Wa8730a003g005260, Wa8730a003g006530, Wa8730a005g003480, Wa8730a006g005060, Wa8730a007g008930, Wa8730a008g000260, Wa8730a008g004080, Wa8730a009g001620, Wa8730a009g001630, Wa8730a009g002590, Wa8730a012g005240, Wa8730a014g005820, Wa8730a015g004980, Wa8730a016g003000, Wa8730a017g004030, …
GO:0030497	fatty acid elongation	3/117	8/13944	3.13e-05	9	3	0.018019	Wa8730a008g002540, Wa8730a009g000590, Wa8730a016g001110
GO:0000038	very long-chain fatty acid metabolic process	4/117	24/13944	4.39e-05	8	4	0.023373	Wa8730a006g004490, Wa8730a008g002540, Wa8730a009g000590, Wa8730a020g002750
GO:1901576	organic substance biosynthetic process	25/117	1255/13944	5.04e-05	3	25	0.02488	Wa8730a001g011890, Wa8730a003g005060, Wa8730a003g005260, Wa8730a006g004490, Wa8730a007g008930, Wa8730a008g002540, Wa8730a008g003940, Wa8730a009g000590, Wa8730a009g001620, Wa8730a009g003340, Wa8730a011g004850, Wa8730a011g005590, Wa8730a012g005240, Wa8730a013g002080, Wa8730a014g005820, Wa8730a015g004980, Wa8730a015g005080, Wa8730a015g005520, Wa8730a016g001110, Wa8730a016g003000, Wa8730a017g002740, …
GO:0008610	lipid biosynthetic process	10/117	259/13944	6.41e-05	4	10	0.027702	Wa8730a006g004490, Wa8730a008g002540, Wa8730a009g000590, Wa8730a011g004850, Wa8730a013g002080, Wa8730a015g005080, Wa8730a015g005520, Wa8730a016g001110, Wa8730a018g003530, Wa8730a020g002750
GO:0009058	biosynthetic process	25/117	1302/13944	7.41e-05	2	25	0.030146	Wa8730a001g011890, Wa8730a003g005060, Wa8730a003g005260, Wa8730a006g004490, Wa8730a007g008930, Wa8730a008g002540, Wa8730a008g003940, Wa8730a009g000590, Wa8730a009g001620, Wa8730a009g003340, Wa8730a011g004850, Wa8730a011g005590, Wa8730a012g005240, Wa8730a013g002080, Wa8730a014g005820, Wa8730a015g004980, Wa8730a015g005080, Wa8730a015g005520, Wa8730a016g001110, Wa8730a016g003000, Wa8730a017g002740, …
GO:0032787	monocarboxylic acid metabolic process	9/117	219/13944	9.39e-05	6	9	0.036075	Wa8730a006g004490, Wa8730a008g002540, Wa8730a008g004080, Wa8730a009g000590, Wa8730a010g004870, Wa8730a016g001110, Wa8730a016g002030, Wa8730a018g003530, Wa8730a020g002750
GO:0043170	macromolecule metabolic process	6/117	2515/13944	5.45e-05	3	6	0.025113	Wa8730a001g010900, Wa8730a008g003940, Wa8730a009g003340, Wa8730a015g003690, Wa8730a017g002740, Wa8730a019g003750
GO:0005783	endoplasmic reticulum	18/117	549/13944	6.92e-07	5	18	0.000743	Wa8730a001g011890, Wa8730a002g009950, Wa8730a006g004490, Wa8730a008g002540, Wa8730a009g000590, Wa8730a009g001620, Wa8730a009g001730, Wa8730a011g004850, Wa8730a011g005590, Wa8730a014g005820, Wa8730a015g005080, Wa8730a015g005520, Wa8730a016g003000, Wa8730a017g002740, Wa8730a018g000750, Wa8730a019g001620, Wa8730a020g002750, Wa8730a020g002780
GO:0009922	fatty acid elongase activity	5/117	9/13944	4.68e-09	6	5	1.11e-05	Wa8730a003g005060, Wa8730a003g005260, Wa8730a009g000590, Wa8730a014g005820, Wa8730a016g003000
GO:0016746	transferase activity, transferring acyl groups	11/117	129/13944	1.04e-08	3	11	1.24e-05	Wa8730a003g005060, Wa8730a003g005260, Wa8730a009g000590, Wa8730a010g004870, Wa8730a011g004850, Wa8730a013g002080, Wa8730a014g005820, Wa8730a015g005080, Wa8730a015g005520, Wa8730a016g003000, Wa8730a018g003530
GO:0004312	fatty acid synthase activity	5/117	15/13944	1.07e-07	5	5	8.45e-05	Wa8730a003g005060, Wa8730a003g005260, Wa8730a009g000590, Wa8730a014g005820, Wa8730a016g003000
GO:0016747	transferase activity, transferring acyl groups other than amino-acyl groups	9/117	118/13944	6.29e-07	4	9	0.000372	Wa8730a003g005060, Wa8730a003g005260, Wa8730a009g000590, Wa8730a010g004870, Wa8730a011g004850, Wa8730a014g005820, Wa8730a015g005080, Wa8730a015g005520, Wa8730a016g003000
GO:0045703	ketoreductase activity	3/117	8/13944	3.13e-05	4	3	0.01479	Wa8730a006g004490, Wa8730a020g002750, Wa8730a020g002780
GO:0045430	chalcone isomerase activity	2/117	2/13944	6.98e-05	4	2	0.027516	Wa8730a009g001620, Wa8730a018g000750

[truncated: 5 more sheets: C2 GO, C3 GO, C5 GO, C6 GO, C7 GO]
