# Supplementary material for: Streamlined spatial and environmental expression signatures characterize the minimalist duckweedWolffia australiana
Source: HighWire-hosted journal article supplement (doi:10.1101/gr.279091.124), 2024-07-01
Supplement: Supplemental_Dataset_S9.xlsx [file Supplemental_Dataset_S9.xlsx]

## Sheet: Pseudobulked Dusk vs Dawn
Dataset S9. Differential Expression Between Pseudobulked Dusk and Dawn scRNA-Seq Datasets
Genes showing significant differential expression (Log 2FC >1 & Adj. p Value <0.05) with a minimum total read count >10 in at least one dataset
Gene	Base Mean	Log 2 FC	p Value	Adj. p Value	Dawn Mean Normalized Counts	Dusk Mean Normalized Counts	Arabidopsis Orthologues	Arabidopsis Gene Names	Arabidopsis Gene Description
Wa8730a010g004180	195.02	-8.40874	6.1262e-18	3.57351e-16	388.854	1.18639	AT1G67980;AT4G26220	CCOAMT, CCoAOMT7	Encodes S-adenosyl-L-methionine: transcaffeoyl Coenzyme A 3-O-methyltransferase.;Encodes a caffeoyl-coenzyme A O-methyltransferase (CCoAOMT)-like protein with a strong preference for methylating the para position of flavanones and dihydroflavonols, whereas flavones and flavonols are methylated in the meta-position.
Wa8730a012g001400	19.8974	-8.1441	4.33992e-06	0.000121056	39.7948	0	AT1G71691;AT1G33811;AT5G08460;AT1G29670	,	GDSL-motif esterase/acyltransferase/lipase. Enzyme group with broad substrate specificity that may catalyze acyltransfer or hydrolase reactions with lipid and non-lipid substrates.;GDSL-motif esterase/acyltransferase/lipase. Enzyme group with broad substrate specificity that may catalyze acyltransfer or hydrolase reactions with lipid and non-lipid substrates.;GDSL-motif esterase/acyltransferase/l…
Wa8730a018g003640	892.796	-8.10111	1.41723e-80	5.14682e-78	1779.1	6.49601
Wa8730a012g002600	43.762	-7.83232	3.34898e-06	9.5209e-05	87.1058	0.418153	AT5G04180	ACA3, ATACA3	alpha carbonic anhydrase 3
Wa8730a012g005270	302.177	-7.45474	1.63749e-36	1.80733e-34	600.999	3.35498	AT3G47500;AT1G26790;AT1G29160;AT2G34140	CDF3,	Dof-type zinc finger domain-containing protein, identical to H-protein promoter binding factor-2a GI:3386546 from (Arabidopsis thaliana). Interacts with LKP2 and FKF1, but its overexpression does not change flowering time under short or long day conditions.;Dof-type zinc finger DNA-binding family protein;Encodes a DOF transcription factor involved in seed coat development.;CDF4 is member of the g…
Wa8730a017g004030	17350.3	-7.17499	0	0	34462.2	238.417
Wa8730a010g002720	27.5672	-7.16702	3.64946e-05	0.00091099	54.7843	0.350087
Wa8730a012g002610	692.826	-7.14789	1.01282e-33	1.03657e-31	1376.14	9.51066	AT5G04180	ACA3, ATACA3	alpha carbonic anhydrase 3
Wa8730a002g003100	258.601	-7.07895	6.2988e-35	6.62728e-33	513.566	3.637
Wa8730a011g005630	355.089	-7.04994	2.05907e-46	2.97193e-44	705.005	5.17348	AT2G24790;AT5G24930;AT5G57660	ATCOL3, BBX4, COL3, ATCOL4, BBX5, COL4, ATCOL5, BBX6, COL5	Positive regulator of photomorphogenesis that acts downstream of COP1 but can promote lateral root development independently of COP1 and also function as a daylength-sensitive regulator of shoot branching.;CONSTANS-like 4;CONSTANS-like 5
Wa8730a017g002130	121.29	-6.98131	6.0031e-18	3.51995e-16	240.693	1.88657	AT2G46830;AT1G01060	AtCCA1, CCA1, LHY, LHY1	Encodes a transcriptional repressor that performs overlapping functions with LHY in a regulatory feedback loop that is closely associated with the circadian oscillator of Arabidopsis. Binds to the evening element in the promoter of TOC1 and represses TOC1 transcription. CCA1 and LHY colocalize in the nucleus and form heterodimers in vivo. CCA1 and LHY function synergistically in regulating circad…
Wa8730a001g000320	296.656	-6.50594	8.21417e-45	1.17057e-42	587.021	6.29181
Wa8730a010g005020	6.36628	-6.50203	0.00210108	0.0407125	12.7326	0	AT5G24860;AT4G31380;AT5G10625	ATFPF1, FPF1, FLP1,	encodes a small protein of 12.6 kDa that regulates flowering and is involved in gibberellin signalling pathway. It is expressed in apical meristems immediately after the photoperiodic induction of flowering. Genetic interactions with flowering time and floral organ identity genes suggest that this gene may be involved in modulating the competence to flower. There are two other genes similar to FP…
Wa8730a005g003470	6.19062	-6.45589	0.00241736	0.0461264	12.3812	0	AT5G25610	ATRD22, RD22	responsive to dehydration 22 (RD22) mediated by ABA
Wa8730a002g000180	555.817	-6.36134	9.44502e-79	3.22218e-76	1098.16	13.4782	AT4G27360		Dynein light chain type 1 family protein
Wa8730a007g005580	126.134	-6.3584	6.70134e-21	4.43786e-19	249.332	2.93683	AT1G65560;AT3G03080;AT3G59845		Zinc-binding dehydrogenase family protein;Zinc-binding dehydrogenase family protein;Zinc-binding dehydrogenase family protein
Wa8730a017g004000	330.576	-6.35039	3.86779e-49	5.88427e-47	653.119	8.03249	AT1G29930;AT5G54270	AB140, CAB1, CAB140, LHCB1.3, LHCB3, LHCB3*1	Subunit of light-harvesting complex II (LHCII),which absorbs light and transfers energy to the photosynthetic reaction center.;Lhcb3 protein is a component of the main light harvesting chlorophyll a/b-protein complex of Photosystem II (LHC II).
Wa8730a012g002590	77.3883	-6.32808	8.80929e-14	4.25644e-12	152.89	1.88657	AT5G04180	ACA3, ATACA3	alpha carbonic anhydrase 3
Wa8730a004g004780	1272.09	-6.27465	2.80393e-158	3.94583e-155	2511.57	32.6162	AT4G27030;AT1G62190	FAD4, FADA,	Encodes an unusual palmitate desaturase that is highly substrate specific. It introduces a delta-3 trans double bond at palmitate at the sn-2 position of phosphatidylglycerol.;Kua-ubiquitin conjugating enzyme hybrid localisation domain
Wa8730a008g003780	2911.14	-6.10625	3.95874e-43	5.24323e-41	5738.72	83.563	AT4G19690;AT3G12750;AT2G30080;AT1G31260;AT2G32270;AT1G05300;AT2G04032	ATIRT1, IRT1, AtZIP1, ZIP1, ATZIP6, ZIP6, ZIP10, ZIP3, ZIP5, ZIP7	Fe(II) transport protein (IRT1);A member of Zrt- and Irt-related protein (ZIP) family. transcript is induced in response to zinc deficiency in the root.;member of Fe(II) transporter isolog family. Gene expression is not regulated by iron, copper, or zinc deficiency or excess.;member of Fe(II) transporter isolog family;A member of Zrt- and Irt-related protein (ZIP) family. transcript is induced in…
Wa8730a008g000260	384.124	-6.05087	2.04223e-60	4.25766e-58	756.929	11.3194	AT3G63240		DNAse I-like superfamily protein
Wa8730a001g012100	194.106	-5.96588	6.11869e-33	5.93829e-31	381.997	6.21399	AT1G07240;AT3G11340;AT5G05860;AT3G46660;AT5G59590;AT2G36970;AT3G55710;AT2G30150	UGT71C5, UGT76B1, UGT76C2, UGT76E12, UGT76E2,	Encodes a UDP-glucosyltransferase that plays a role in abscisic acid (ABA) glucosylation from ABA to ABA-glucose ester and regulates ABA homeostasis, thereby influencing the ABA signal network.;Encodes a glucosyltransferase that conjugates isoleucic acid and modulates plant defense and senescence.;Encodes a cytokinin N-glucosyltransferase that is involved in cytokinin homeostasis and cytokinin re…
Wa8730a013g002490	22.3842	-5.84859	2.83306e-05	0.000718347	44.0001	0.76824	AT4G17550;AT3G47420	AtG3Pp4, G3Pp4, ATPS3, AtG3Pp1, G3Pp1, PS3	Encodes a member of the phosphate starvation-induced glycerol-3-phosphate permease gene family: AT3G47420(G3Pp1), AT4G25220(G3Pp2), AT1G30560(G3Pp3), AT4G17550(G3Pp4) and AT2G13100(G3Pp5).;Encodes a Pi starvation-responsive protein AtPS3.
Wa8730a005g007220	23453.9	-5.71509	0	0	46030.9	876.961	AT1G29930;AT3G27690	AB140, CAB1, CAB140, LHCB1.3, LHCB2, LHCB2.3, LHCB2.4	Subunit of light-harvesting complex II (LHCII),which absorbs light and transfers energy to the photosynthetic reaction center.;Encodes Lhcb2.4. Belongs to the Lhc super-gene family encodes the light-harvesting chlorophyll a/b-binding (LHC) proteins that constitute the antenna system of the photosynthetic apparatus.
Wa8730a009g002870	29.1443	-5.66115	1.39418e-06	4.0768e-05	57.2382	1.05026	AT5G04950;AT1G09240	ATNAS1, NAS1, ATNAS3, NAS3	Encodes a nicotianamide synthase.;Encodes a nicotianamine synthase.
Wa8730a018g000010	378.356	-5.60595	1.13989e-60	2.4213e-58	741.551	15.1606	AT5G58770	AtcPT4, cPT4	Undecaprenyl pyrophosphate synthetase family protein
Wa8730a003g001800	226.404	-5.59999	3.06737e-39	3.79477e-37	443.657	9.15082	AT1G47740;AT4G31980	,	PPPDE putative thiol peptidase family protein;
Wa8730a009g001550	4737.69	-5.46343	8.2917e-289	3.1116e-285	9264.88	210.508	AT3G56290
Wa8730a004g000530	190.379	-5.28077	1.62379e-33	1.6469e-31	371.121	9.63704	AT2G34430	LHB1B1, LHCB1.4	Photosystem II type I chlorophyll a/b-binding protein
Wa8730a006g000640	15.2039	-5.27931	0.000392064	0.00850453	29.6396	0.76824	AT3G21690;AT2G34360	,	MATE efflux family protein;MATE efflux family protein
Wa8730a003g004150	1219.45	-5.199	9.9964e-145	1.02309e-141	2373.89	65.0184	AT5G19855	AtRbcX2, RbcX2	Encodes a chloroplast stromal localized RbcX protein that acts as a chaperone in the folding of Rubisco.
Wa8730a010g003830	1833.36	-5.16515	1.14184e-162	1.8364e-159	3568.12	98.6073
Wa8730a002g009390	909.858	-5.07298	2.95437e-119	2.21735e-116	1767.39	52.3279	AT3G24190		Protein kinase superfamily protein
Wa8730a006g000670	18.9305	-5.01145	8.0132e-05	0.00190724	36.7428	1.11833	AT2G34360		MATE efflux family protein
Wa8730a010g004020	100.159	-4.97444	2.78014e-18	1.68274e-16	193.9	6.41819	AT5G16480	AtPFA-DSP5, PFA-DSP5	Encodes an atypical dual-speci&#64257;city phosphatase.
Wa8730a005g000130	37.0381	-4.96097	8.03881e-08	2.57837e-06	71.7033	2.37279	AT1G68620;AT1G49650	,	alpha/beta-Hydrolases superfamily protein;alpha/beta-Hydrolases superfamily protein
Wa8730a002g004940	3615.19	-4.92173	6.68494e-243	1.88148e-239	6999.71	230.677	AT1G19920	APS2, ASA1	encodes a chloroplast form of ATP sulfurylase
Wa8730a001g010850	52.0531	-4.87716	1.81234e-10	7.05997e-09	100.683	3.42305	AT5G13150;AT3G55150;AT2G39380;AT3G09520;AT1G07725;AT5G59730;AT2G28650	ATEXO70C1, EXO70C1, ATEXO70H1, EXO70H1, ATEXO70H2, EXO70H2, ATEXO70H4, EXO70H4, ATEXO70H6, EXO70H6, ATEXO70H7, EXO70H7, ATEXO70H8, EXO70H8	A member of EXO70 gene family, putative exocyst subunits, conserved in land plants. Arabidopsis thaliana contains 23 putative EXO70 genes, which can be classified into eight clusters on the phylogenetic tree.;A member of EXO70 gene family, putative exocyst subunits, conserved in land plants. Arabidopsis thaliana contains 23 putative EXO70 genes, which can be classified into eight clusters on the …
Wa8730a002g006800	21.982	-4.81159	2.5197e-05	0.000647643	42.4955	1.46841	AT1G65480	FT, RSB8	FT, together with LFY, promotes flowering and is antagonistic with its homologous gene, TERMINAL FLOWER1 (TFL1). FT is expressed in leaves and is induced by long day treatment. Either the FT mRNA or protein is translocated to the shoot apex where it induces its own expression. Recent data suggests that FT protein acts as a long-range signal. FT is a target of CO and acts upstream of SOC1.
Wa8730a018g002020	231.341	-4.79739	1.81867e-38	2.13277e-36	446.481	16.2011
Wa8730a006g004860	694.617	-4.78733	1.27961e-91	5.54071e-89	1340.42	48.8173	AT2G33270	ACHT3	Encodes a member of the thioredoxin family protein. Located in the chloroplast.
Wa8730a007g000320	19.784	-4.63813	7.31101e-05	0.00175122	38.0314	1.53648	AT3G11570;AT5G06230	TBL8, TBL9	Encodes a member of the TBL (TRICHOME BIREFRINGENCE-LIKE) gene family containing a plant-specific DUF231 (domain of unknown function) domain. TBL gene family has 46 members, two of which (TBR/AT5G06700 and TBL3/AT5G01360) have been shown to be involved in the synthesis and deposition of secondary wall cellulose, presumably by influencing the esterification state of pectic polymers. A nomenclature…
Wa8730a002g004760	514.317	-4.63015	6.42383e-71	1.72189e-68	988.879	39.7541
Wa8730a002g007540	581.405	-4.59481	8.64172e-78	2.86142e-75	1116.43	46.3764	AT5G52250;AT5G23730	EFO1, RUP1, EFO2, RUP2	Encodes a transducin protein whose gene expression is induced by UV-B. This induction is reduced in hy5 mutant and may be a target of HY5 during UV-B response.;Encodes REPRESSOR OF UV-B PHOTOMORPHOGENESIS 2 (RUP2). Functions as a repressor of UV-B signaling.
Wa8730a005g000990	14.0254	-4.58941	0.000969021	0.0196209	27.0006	1.05026	AT4G13345	MEE55	Serinc-domain containing serine and sphingolipid biosynthesis protein
Wa8730a009g001840	291.743	-4.58338	1.17612e-44	1.6551e-42	559.885	23.6015
Wa8730a003g000290	66.429	-4.58083	8.94283e-13	4.02713e-11	127.548	5.30962	AT5G10490;AT1G58200	MSL2, MSL3	A member of MscS-like gene family, structurally very similar to MSL3, comprising of an N-terminal chloroplast transit peptide, five trans-membrane helices and a C-terminal cytoplasmic domain. Mutant plants showed abnormalities in the size and shape of plastids. MSL2-GFP was localized to discrete foci on the plastid envelope and co-localize with the plastid division protein AtMinE.;A member of Msc…
Wa8730a010g002310	3457.32	-4.54903	1.48992e-155	1.86372e-152	6630.49	284.152	AT5G42110
Wa8730a007g005200	976.9	-4.47495	1.95774e-109	1.16001e-106	1869.9	83.9036	AT1G23020;AT5G49740	ATFRO3, FRO3, ATFRO7, FRO7	Encodes a ferric chelate reductase whose transcription is regulated by FIT1. Expressed in the root, shoot, flower and cotyledon.;Encodes a chloroplast ferric chelate reductase. Shows differential splicing and has three different mRNA products. Expressed in the shoot, flower and cotyledon.
Wa8730a017g003930	940.46	-4.43871	3.19991e-88	1.28659e-85	1798.14	82.7853	AT1G29930;AT5G54270	AB140, CAB1, CAB140, LHCB1.3, LHCB3, LHCB3*1	Subunit of light-harvesting complex II (LHCII),which absorbs light and transfers energy to the photosynthetic reaction center.;Lhcb3 protein is a component of the main light harvesting chlorophyll a/b-protein complex of Photosystem II (LHC II).
Wa8730a013g001870	146.673	-4.30467	8.74761e-24	6.39485e-22	279.169	14.1784
Wa8730a003g002510	405.79	-4.28929	1.97152e-54	3.41468e-52	772.313	39.2678	AT2G15020
Wa8730a004g004970	7227.15	-4.28631	1.64528e-128	1.42481e-125	13748.8	705.536	AT1G29920;AT2G34430;AT1G61520;AT3G27690;AT5G54270	AB165, CAB2, LHCB1.1, LHB1B1, LHCB1.4, LHCA3, LHCB2, LHCB2.3, LHCB2.4, LHCB3, LHCB3*1	Encodes lhcb1.1 a component of the LHCIIb light harvesting complex associated with photosystem II.;Photosystem II type I chlorophyll a/b-binding protein;PSI type III chlorophyll a/b-binding protein (Lhca3*1);Encodes Lhcb2.4. Belongs to the Lhc super-gene family encodes the light-harvesting chlorophyll a/b-binding (LHC) proteins that constitute the antenna system of the photosynthetic apparatus.;L…
Wa8730a006g005670	631.877	-4.28169	8.78343e-76	2.74677e-73	1201.87	61.8871	AT1G70410;AT4G33580;AT5G14740	ATBCA4, BCA4, CA4, ATBCA5, BCA5, BETA, CA18, CA2	Encodes a putative beta-carbonic anhydrase betaCA4. Together with betaCA1 (At3g01500) regulates CO2-controlled stomatal movements in guard cells.;beta carbonic anhydrase 5;Encodes a beta carbonic anhydrase likely to be localized in the cytoplasm. Expression of its mRNA is seen in etiolated seedlings and points to a possible nonphotosynthetic role for this isoform.
Wa8730a013g002640	674.999	-4.26052	5.45779e-79	1.92012e-76	1283.21	66.7884	AT5G24470;AT2G46790	APRR5, PRR5, APRR9, PRR9, TL1	Encodes a pseudo-response regulator whose mutation affects various circadian-associated biological events such as flowering time in the long-day photoperiod conditions, red light sensitivity of seedlings during early photomorphogenesis, and the period of free-running rhythms of certain clock-controlled genes including CCA1 and APRR1/TOC1 in constant white light. Acts as transcriptional repressor …
Wa8730a011g001940	908.652	-4.25118	6.24292e-92	2.81131e-89	1727.03	90.2732	AT2G38740		Haloacid dehalogenase-like hydrolase (HAD) superfamily protein
Wa8730a015g001450	1333.17	-4.11466	8.06726e-113	5.04562e-110	2521.17	145.178	AT3G21150;AT2G24790;AT5G24930;AT5G57660	AtBBX32, BBX32, EIP6, ATCOL3, BBX4, COL3, ATCOL4, BBX5, COL4, ATCOL5, BBX6, COL5	Encodes a protein with a B-box domain predicted to act as a transcription factor. Expression of the BBX32 gene is affected by monochromatic red light.;Positive regulator of photomorphogenesis that acts downstream of COP1 but can promote lateral root development independently of COP1 and also function as a daylength-sensitive regulator of shoot branching.;CONSTANS-like 4;CONSTANS-like 5
Wa8730a007g006370	5577.55	-4.0951	5.36078e-170	1.00586e-166	10537.9	617.16
Wa8730a016g000060	156.912	-4.08801	1.88012e-23	1.34817e-21	296.562	17.2611	AT1G69560;AT3G29020;AT1G26780;AT5G39700	ATMYB105, LOF2, MYB105, AtMYB110, MYB110, AtMYB117, LOF1, MYB117, AtMYB89, MYB89	Encodes LOF2 (LATERAL ORGAN FUSION2), a MYB-domain transcription factor expressed in organ boundaries. Functions in boundary specification, meristem initiation and maintenance, and organ patterning. Also see LOF1 (At1g26780).;Encodes a putative transcription factor (MYB110).;Encodes LOF1 (LATERAL ORGAN FUSION1), a MYB-domain transcription factor expressed in organ boundaries. Functions in boundar…
Wa8730a012g004550	4707.26	-4.06697	6.3835e-172	1.43731e-168	8884.21	530.31	AT4G24380;AT5G65400	,	;alpha/beta-Hydrolases superfamily protein
Wa8730a004g001650	257.478	-3.97098	8.50295e-35	8.86353e-33	484.08	30.8755
Wa8730a020g002460	152.462	-3.96951	1.56091e-22	1.09147e-20	286.623	18.3016
Wa8730a017g000860	414.492	-3.96474	7.1621e-50	1.11987e-47	779.107	49.8773
Wa8730a005g003430	38.0983	-3.93964	9.91008e-07	2.92828e-05	71.3829	4.81364	AT5G25610	ATRD22, RD22	responsive to dehydration 22 (RD22) mediated by ABA
Wa8730a020g001730	2176.22	-3.90519	1.0532e-123	8.46923e-121	4080.34	272.103	AT2G31560;AT2G43340	,	Protein of unknown function (DUF1685);Protein of unknown function (DUF1685)
Wa8730a011g002510	1592.38	-3.89892	7.50415e-108	4.22409e-105	2984.24	200.52	AT5G52570	B2, BCH2, BETA-OHASE, CHY2	Converts &#946;-carotene to zeaxanthin via cryptoxanthin.
Wa8730a005g003460	320.204	-3.89063	5.3274e-40	6.73886e-38	599.895	40.5125	AT5G25610	ATRD22, RD22	responsive to dehydration 22 (RD22) mediated by ABA
Wa8730a003g004640	230.014	-3.88845	2.68838e-06	7.70121e-05	431.078	28.9501	AT3G52970;AT1G74550	CYP76G1, CYP98A9	member of CYP76G;member of CYP98A
Wa8730a004g000350	4108.04	-3.87454	2.26863e-155	2.55403e-152	7691.87	524.213
Wa8730a001g011270	52.1645	-3.84087	1.89238e-08	6.35952e-07	97.6191	6.70996
Wa8730a004g005410	314.449	-3.78568	1.03028e-36	1.14841e-34	586.558	42.3408	AT5G66450	LPPepsilon2	Encodes a phosphatidic acid phosphatase that can be detected in chloroplast membrane fractions. This gene (LPPepsilon2) and LPPepsilon1, appear to be less important for diacylglycerol formation in the plastids than LPPgamma.
Wa8730a002g007210	1281.14	-3.7563	1.02282e-86	3.97064e-84	2386.09	176.2	AT1G03630;AT5G54190;AT4G27440	POR, PORC, PORA, PORB	Encodes for a protein with protochlorophyllide oxidoreductase activity. The enzyme is NADPH- and light-dependent.;light-dependent NADPH:protochlorophyllide oxidoreductase A;light-dependent NADPH:protochlorophyllide oxidoreductase B
Wa8730a007g000810	368.289	-3.74873	4.1787e-42	5.40734e-40	685.651	50.9276	AT1G44446	ATCAO, CAO, CH1	Encodes chlorophyllide <i>a</i> oxygenase which converts chlorophyllide <i>a</i> to chlorophyllide <i>b</i> by catalyzing two successive hydroxylations at the 7-methyl group of chlorophyllide <i>a</i> . Mutants are deficient in pigments that associate with thylakoid membrane proteins, lacking chlorophyll <i>b</i> and light-harvesting proteins of photosystem II. The protein was shown through cross…
Wa8730a014g000020	2161.2	-3.743	3.62823e-119	2.55292e-116	4021.96	300.441
Wa8730a010g001720	565.497	-3.71924	4.06844e-56	7.27024e-54	1051.02	79.9748	AT5G24120	ATSIG5, SIG5, SIGE	Encodes a specialized sigma factor that functions in regulation of plastid genes and is responsible for the light-dependent transcription at the psbD LRP. Activation of SIG5 is dependent upon blue light and mediated by cryptochromes.
Wa8730a010g005400	708.401	-3.70193	1.40148e-64	3.28704e-62	1315.92	100.883	AT3G12120	AtFAD2, FAD2	Major enzyme responsible for the synthesis of 18:2 fatty acids in the endoplasmic reticulum. Contains His-rich motifs, which contribute to the interaction with the electron donor cytochrome b5. Mutations in this gene suppress the low temperature-induced phenotype of Arabidopsis tocopherol-deficient mutant vte2.
Wa8730a016g000630	70.5612	-3.67797	2.71172e-09	9.66091e-08	130.989	10.133	AT1G34245;AT1G71866	EPF2,	Encodes a secretory peptide EPF2 expressed in proliferating cells of the stomatal lineage, known as meristemoids, and in guard mother cells, the progenitors of stomata. Controls asymmetric cell divisions during stomatal development. EPF2 is related to EPF1, also involved in stomatal development.;
Wa8730a017g001500	750.813	-3.67533	9.05743e-63	2.03937e-60	1392.59	109.042	AT4G39030	EDS5, SCORD3, SID1	Encodes an orphan multidrug and toxin extrusion transporter. Essential component of salicylic acid-dependent signaling for disease resistance. Member of the MATE-transporter family. Expression induced by salicylic acid. Mutants are salicylic acid-deficient.
Wa8730a020g000180	51.83	-3.67457	7.16364e-08	2.31084e-06	96.2499	7.41014	AT1G72110;AT5G22490	,	O-acyltransferase (WSD1-like) family protein;O-acyltransferase (WSD1-like) family protein
Wa8730a014g002390	2437.12	-3.6683	3.54815e-117	2.34971e-114	4518.55	355.676	AT3G63410	APG1, E37, IEP37, VTE3	Encodes a MPBQ/MSBQ methyltransferase located in the chloroplast inner envelope membrane. Mutant plants lack plastoquinone (PQ), suggesting that the APG1 protein is involved in the methylation step of PQ biosynthesis. The gene product is also involved in tocopherol (vitamin E) biosynthesis.
Wa8730a010g006720	33.963	-3.65967	8.45945e-06	0.000227838	62.8985	5.0276	AT4G30550;AT2G23960	GGP3,	Class I glutamine amidotransferase-like superfamily protein;Class I glutamine amidotransferase-like superfamily protein
Wa8730a014g004230	215.725	-3.65379	5.56037e-26	4.28758e-24	399.533	31.916
Wa8730a001g006890	810.07	-3.59316	4.77791e-66	1.22249e-63	1496.35	123.794	AT2G29980;AT3G11170;AT5G05580	AtFAD3, FAD3, AtFAD7, FAD7, FADD, AtFAD8, FAD8	Endoplasmic reticulum enzyme responsible for the synthesis of 18:3 fatty acids from phospholipids. Uses cytochrome b5 as electron donor.;Chloroplastic enzyme responsible for the synthesis of 16:3 and 18:3 fatty acids from galactolipids, sulpholipids and phosphatidylglycerol. Uses ferredoxin as electron donor. Gene expression is induced by wounding in shoot and root. The wound-response in shoot is…
Wa8730a00Ug000020	131.243	-3.57557	1.01028e-16	5.60282e-15	242.025	20.4605
Wa8730a014g004490	176.618	-3.55186	5.57171e-18	3.2841e-16	325.9	27.3358
Wa8730a002g009930	170.399	-3.5435	2.25453e-20	1.46714e-18	314.037	26.762	AT2G28630;AT5G04530;AT1G04220	KCS12, KCS19, KCS2	Encodes KCS12, a member of the 3-ketoacyl-CoA synthase family involved in the biosynthesis of VLCFA (very long chain fatty acids).;Encodes KCS19, a member of the 3-ketoacyl-CoA synthase family involved in the biosynthesis of VLCFA (very long chain fatty acids).;Encodes KCS2, a member of the 3-ketoacyl-CoA synthase family involved in the biosynthesis of VLCFA (very long chain fatty acids).
Wa8730a005g003400	521.01	-3.52091	9.8617e-47	1.44186e-44	958.808	83.2132	AT1G64100;AT3G61520;AT5G25630		pentatricopeptide (PPR) repeat-containing protein;Pentatricopeptide repeat (PPR) superfamily protein;Tetratricopeptide repeat (TPR)-like superfamily protein
Wa8730a014g006180	150.464	-3.50705	4.46281e-18	2.68675e-16	276.684	24.2434	AT1G18330;AT3G10113	EPR1, RVE7,	EARLY-PHYTOCHROME-RESPONSIVE1;Homeodomain-like superfamily protein
Wa8730a019g000440	290.639	-3.49523	2.08714e-30	1.83571e-28	533.852	47.4267	AT3G55580;AT3G53830	,	TCF1 encodes a member of the RCC1 gene family and is required for chromatin based gene regulation of cold responsive genes in a CBF-independent manner. It is expressed in response to cold but not ABA.;Regulator of chromosome condensation (RCC1) family protein
Wa8730a016g003770	32.3066	-3.48502	2.91021e-05	0.00073625	59.3717	5.24155	AT1G70300;AT1G60160	KUP6,	potassium transporter;Potassium transporter family protein
Wa8730a008g004320	4495.38	-3.48153	3.52481e-99	1.80374e-96	8251.16	739.602	AT4G04610;AT1G62180;AT4G21990	APR, APR1, ATAPR1, PRH19, APR2, APSR, ATAPR2, PRH, PRH43, APR3, ATAPR3, PRH-26, PRH26	Encodes a protein disulfide isomerase-like (PDIL) protein, a member of a multigene family within the thioredoxin (TRX) superfamily. This protein also belongs to the adenosine 5'-phosphosulfate reductase-like (APRL) group.;encodes a adenosine 5'-phosphosulfate reductase, involved in sulfate assimilation. Is a major effect locus for natural variation of shoot sulfate content in Arabidopsis.;Encodes…
Wa8730a015g006000	126.974	-3.47924	9.6753e-16	5.1623e-14	233.127	20.8203
Wa8730a005g003450	20.8044	-3.47641	0.000822941	0.0169994	38.1857	3.42305	AT5G25610	ATRD22, RD22	responsive to dehydration 22 (RD22) mediated by ABA
Wa8730a004g001010	353.076	-3.46878	5.65981e-35	6.01114e-33	647.484	58.6683
Wa8730a005g000280	66.6387	-3.45851	6.31694e-09	2.18819e-07	122.104	11.1735	AT3G13080;AT1G04120	ABCC3, ATMRP3, MRP3, ABCC5, ATABCC5, ATMRP5, MRP5	encodes an ATP-dependent MRP-like ABC transporter able to transport glutathione-conjugates as well as chlorophyll catabolites. The expression of this gene is upregulated by herbicide safeners such as benoxacor and fenclorim.;encodes a high-affinity inositol hexakisphosphate transporter that plays a role in guard cell signaling and phytate storage. It is a member of MRP subfamily / ABC transporter…
Wa8730a006g000220	203.175	-3.44423	4.02448e-22	2.76266e-20	372.255	34.0944	AT4G27310;AT5G54470	BBX28, BBX29	B-box type zinc finger family protein;B-box type zinc finger family protein
Wa8730a006g002560	1891.8	-3.43452	1.51456e-93	7.10456e-91	3463.18	320.415	AT3G24100;AT4G13615	,	Uncharacterised protein family SERF;Uncharacterised protein family SERF
Wa8730a004g004830	304.124	-3.41984	7.72931e-30	6.59216e-28	556.474	51.7736
Wa8730a009g003610	1053.5	-3.41738	4.41711e-67	1.15646e-64	1927.02	179.973	AT5G13630	ABAR, CCH, CCH1, CHLH, GUN5	Encodes magnesium chelatase involved in plastid-to-nucleus signal transduction.
Wa8730a002g009220	17.978	-3.41185	0.00209595	0.0406832	32.815	3.14103	AT1G65060;AT1G62940;AT4G19010	4CL3, ACOS5,	encodes an isoform of 4-coumarate:CoA ligase (4CL), which is involved in the last step of the general phenylpropanoid pathway. mRNA levels are not induced in response to wounding or to fungal infection by P. parasitica. mRNA is expressed in flowers, to a lesser degree in mature leaves and siliques and marginally in seedling roots and bolting stems of mature plants. The catalytic efficiency was in…
Wa8730a007g004100	164.923	-3.38929	4.81227e-18	2.86648e-16	300.934	28.9111	AT3G01820		P-loop containing nucleoside triphosphate hydrolases superfamily protein
Wa8730a015g000780	38.7506	-3.37313	9.00515e-06	0.000241381	70.7231	6.77803	AT2G19330;AT4G29880;AT4G26050	PIRL6, PIRL7, PIRL8	Encodes PIRL6, a member of the Plant Intracellular Ras-group-related LRRs (Leucine rich repeat proteins). PIRLs are a distinct, plant-specific class of intracellular LRRs that likely mediate protein interactions, possibly in the context of signal transduction.;Encodes PIRL7, a member of the Plant Intracellular Ras-group-related LRRs (Leucine rich repeat proteins). PIRLs are a distinct, plant-spec…
Wa8730a001g011910	433.888	-3.32605	1.5947e-37	1.79531e-35	789.251	78.5259	AT2G39770;AT3G55590	CYT1, EMB101, GMP1, SOZ1, VTC1,	Encodes a GDP-mannose pyrophosphorylase/ mannose-1-pyrophosphatase. This enzyme provides GDP-mannose, which is used for cell wall carbohydrate biosynthesis and protein glycosylation as well as for ascorbate (vitamin C) biosynthesis. Mutations in this gene confer hypersensitivity to NH4+.;Glucose-1-phosphate adenylyltransferase family protein
Wa8730a017g000070	107.338	-3.28341	4.91848e-12	2.13792e-10	194.498	20.1784	AT5G17520	MEX1, RCP1	Encodes a maltose transporter that is expressed in leaves and roots. Mutations at the MEX1 locus cause accumulation of both starch and maltose in leaves, with maltose levels at least 40 times higher than that of wild-type. This gene encodes a protein located in the chloroplast envelope.
Wa8730a011g000050	684.416	-3.27375	1.41341e-47	2.0937e-45	1240.9	127.927	AT5G35970		P-loop containing nucleoside triphosphate hydrolases superfamily protein
Wa8730a018g003010	245.031	-3.27106	9.39694e-24	6.82521e-22	444.162	45.9
Wa8730a012g005370	11169.1	-3.26906	2.63864e-22	1.82244e-20	20238.6	2099.7	AT3G47470	CAB4, LHCA4	Encodes a chlorophyll a/b-binding protein that is more similar to the PSI Cab proteins than the PSII cab proteins. The predicted protein is about 20 amino acids shorter than most known Cab proteins.
Wa8730a012g001170	6508.04	-3.26661	9.44512e-96	4.62318e-93	11790.9	1225.13	AT1G77060;AT1G21440	,	Phosphoenolpyruvate carboxylase family protein;Phosphoenolpyruvate carboxylase family protein
Wa8730a011g001670	572.652	-3.26415	5.22824e-44	7.00709e-42	1037.24	108.059	AT1G32450;AT5G19640;AT1G22540	AtNPF7.3, NPF7.3, NRT1.5	Transmembrane nitrate transporter. Involved in xylem transport of nitrate from root to shoot. Induced in response to nitrate. Not involved in nitrate uptake. expressed in root pericycle cells.;Major facilitator superfamily protein;Major facilitator superfamily protein
Wa8730a011g003630	47.4223	-3.22933	8.76688e-06	0.000235555	85.6937	9.15082	AT2G11810;AT4G31780	ATMGD3, MGD3, MGDC, EMB2797, MGD1, MGDA, UGT81A1	MGD3 is the major enzyme for galactolipid metabolism during phosphate starvation. Does not contribute to galactolipid synthesis under P1-sufficient conditions.;Encodes an A-type monogalactosyldiacylglycerol (MGDG) synthase. It represents the isoform responsible for the bulk of MGDG synthesis in Arabidopsis.
Wa8730a006g003080	667.792	-3.20681	1.33519e-44	1.85575e-42	1205.42	130.163	AT2G43820;AT1G05560;AT1G24100;AT4G14090	ATSAGT1, GT, SAGT1, SGT1, UGT74F2, UGT1, UGT75B1, UGT74B1,	Induced by Salicylic acid, virus, fungus and bacteria.Involved in the tryptophan synthesis pathway. Independent of NPR1 for their induction by salicylic acid. UGT74F1 transfers UDP:glucose to salicylic acid (forming a glucoside (SAG) and a glucose ester (SGE)), benzoic acid, and athranilate in vitro. UGT74F2 shows a weak ability to catalyze the formation of the p-aminobenzoate-glucose ester in vi…
Wa8730a014g000130	486.483	-3.20585	1.42659e-35	1.54428e-33	878.151	94.8146
Wa8730a005g004920	1419.7	-3.1998	2.46149e-05	0.00063413	2560.55	278.851
Wa8730a014g004530	21.0837	-3.16788	0.00198944	0.0388274	37.9081	4.25936	AT5G04230	ATPAL3, PAL3	Member of Phenylalanine ammonialyase (PAL) gene family. Differs significantly from PAL1 and PAL2 and other sequenced plant PAL genes. Arabidopsis has four PALs: AT2G37040 (PAL1), AT3G53260 (PAL2), AT5G04230 (PAL3) and AT3G10340 (PAL4).
Wa8730a001g003580	1465.32	-3.15205	8.98278e-59	1.74359e-56	2634.95	295.695	AT3G62700;AT2G47800;AT1G71330	ABCC14, ATMRP10, MRP10, ABCC4, ATMRP4, EST3, MRP4, ATNAP5, NAP5	member of MRP subfamily;Encodes a plasma membrane localized ATPase transporter involved in multidrug transport. The expression of this gene is upregulated by herbicide safeners such as benoxacor, fluxofenim and fenclorim.;member of NAP subfamily
Wa8730a006g005980	911.698	-3.1492	3.75861e-53	6.2227e-51	1638.57	184.825	AT2G22240;AT5G10170	ATIPS2, ATMIPS2, MIPS2, ATMIPS3, MIPS3	** Referred to as MIPS1 in Mitsuhashi et al 2008. Myo-inositol-1-phosphate synthase isoform 2. Expressed in leaf, root and silique. Immunolocalization experiments with an antibody recognizing MIPS1, MIPS2, and MIPS3 showed endosperm localization.;myo-inositol-1-phosphate synthase isoform 3.Expressed in leaf, root and silique. Immunolocaliazation experiments with an antibody recognizing MIPS1, MIP…
Wa8730a005g000760	1106.79	-3.13093	3.43302e-56	6.33588e-54	1986.57	227.01	AT3G16250;AT4G32590	NDF4, PnsB3,	encodes a novel subunit of the chloroplast NAD(P)H dehydrogenase complex, involved in cyclic electron flow around photosystem I to produce ATP. Contains a 4Fe-4S cluster.;2Fe-2S ferredoxin-like superfamily protein
Wa8730a001g004620	5367.34	-3.13077	1.60568e-90	6.69509e-88	9634.52	1100.17	AT3G56940	ACSF, CHL27, CRD1	Encodes a putative ZIP protein with varying mRNA accumulation in leaves, stems and roots. Has a consensus carboxylate-bridged di-iron binding site.
Wa8730a001g006570	90.3093	-3.11395	1.0908e-09	3.98708e-08	161.899	18.7198	AT2G37970	AtHBP2, HBP2, SOUL-1	SOUL heme-binding family protein
Wa8730a015g002060	2828.29	-3.10907	1.75379e-82	6.58139e-80	5069.09	587.481	AT2G24270	ALDH11A3	Encodes a protein with non-phosphorylating NADP-dependent glyceraldehyde-3-phosphate dehydrogenase activity. The activity of the enzyme was determined from leaf extracts; the enzyme has not been purified to confirm activity.
Wa8730a020g000810	3793.83	-3.10822	1.51741e-75	4.61703e-73	6799.09	788.575	AT3G52720;AT2G28210;AT5G04180;AT1G08080	ACA1, ATACA1, CAH1, ACA2, ATACA2, ACA3, ATACA3, ACA7, ATACA7	Encodes a putative alpha carbonic anhydrase (CAH1) located in the chloroplast stroma. Most chloroplast proteins are encoded by the nuclear genome and imported with the help of sorting signals that are intrinsic parts of the polypeptides. CAH1 takes an alternative route through the secretory pathway, and becomes N-glycosylated before entering the chloroplast.;alpha carbonic anhydrase 2;alpha carbo…
Wa8730a005g003990	2144.65	-3.08803	1.47215e-65	3.68299e-63	3837.35	451.949	AT5G41700;AT5G53300;AT1G64230;AT4G27960	ATUBC8, UBC8, UBC10, UBC28, UBC9	One of the polypeptides that constitute the ubiquitin-conjugating enzyme E2;Encodes a ubiquitin conjugating enzyme.;ubiquitin-conjugating enzyme 28;ubiquitin conjugating enzyme
Wa8730a006g005790	11597.2	-3.06927	2.38042e-65	5.82581e-63	20724.7	2469.64	AT1G15820	CP24, LHCB6	Lhcb6 protein (Lhcb6), light harvesting complex of photosystem II.
Wa8730a018g003060	555.048	-3.06176	2.81127e-35	3.01422e-33	991.018	119.077
Wa8730a008g003240	911.525	-3.06142	4.76359e-44	6.46126e-42	1627.44	195.61	AT1G06690		NAD(P)-linked oxidoreductase superfamily protein
Wa8730a006g006550	732.526	-3.04828	4.61293e-43	6.03865e-41	1306.91	158.141	AT1G68660		Ribosomal protein L12/ ATP-dependent Clp protease adaptor protein ClpS family protein
Wa8730a007g008930	1235.15	-3.03931	5.11539e-58	9.76085e-56	2202.41	267.892	AT2G27820;AT3G44720;AT5G22630;AT1G08250	ADT3, PD1, ADT4, ADT5, ADT6, AtADT6	Encodes a plastid-localized arogenate dehydratase involved in phenylalanine biosynthesis. Not less than six genes encoding ADT were identi&#64257;ed in the Arabidopsis genome: ADT1 [At1g11790]; ADT2 [At3g07630]; ADT3 [At2g27820]; ADT4 [At3g44720]; ADT5 [At5g22630]; and ADT6 [At1g08250].;Encodes a plastid-localized arogenate dehydratase involved in phenylalanine biosynthesis. Not less than six gen…
Wa8730a003g006530	1447.76	-3.02878	3.35916e-61	7.41518e-59	2579.56	315.961	AT2G21970	SEP2	stress enhanced protein 2 (SEP2) chlorophyll a/b-binding protein
Wa8730a006g003620	365.77	-3.02837	2.50219e-26	1.9699e-24	651.497	80.0429	AT3G48780	ATSPT1, SPT1	Encodes one of the two LCB2 subunits (LCB2a and LCB2b) of serine palmitoyltransferase, an enzyme involved in sphingolipid biosynthesis. LCB2a and LCB2b are functional redundant. Double mutants are gametophytic lethal.
Wa8730a012g004920	907.963	-3.01141	6.64537e-38	7.71274e-36	1616.28	199.646	AT4G33500		Protein phosphatase 2C family protein
Wa8730a008g000120	51.1855	-3.01121	1.08911e-05	0.00028918	91.1877	11.1833
Wa8730a002g010730	1608.2	-2.99229	2.61193e-54	4.45531e-52	2856.85	359.556	AT5G60540	ATPDX2, EMB2407, PDX2	Encodes a protein predicted to function in tandem with PDX1 to form glutamine amidotransferase complex with involved in vitamin B6 biosynthesis. PDX2 is predicted to function as glutaminase within the complex.
Wa8730a004g004230	1215.71	-2.98587	5.16938e-53	8.43433e-51	2158.72	272.696	AT5G17230	PSY	Encodes phytoene synthase.
Wa8730a020g000640	1130.63	-2.98091	5.87721e-49	8.82208e-47	2006.99	254.268	AT5G04830		Nuclear transport factor 2 (NTF2) family protein
Wa8730a005g007470	144.839	-2.97269	5.90173e-13	2.72302e-11	256.983	32.694	AT1G66330		senescence-associated family protein
Wa8730a004g001280	181.326	-2.97107	4.66205e-15	2.40759e-13	321.448	41.203	AT1G49000;AT3G18560	,	;
Wa8730a011g000010	1276.04	-2.95322	5.46802e-54	9.18791e-52	2260.42	291.659
Wa8730a002g001130	328.003	-2.95172	2.5931e-22	1.80204e-20	580.651	75.3556	AT5G52740		Copper transport protein family
Wa8730a002g003750	134.704	-2.94708	2.54521e-11	1.06126e-09	238.726	30.6811	AT4G35150;AT5G37170;AT1G77520		O-methyltransferase family protein;O-methyltransferase family protein;O-methyltransferase family protein
Wa8730a014g003150	525.96	-2.93915	2.43049e-32	2.24282e-30	930.518	121.401	AT1G08540	ABC1, ATSIG1, ATSIG2, SIG1, SIG2, SIGA, SIGB	Enodes a subunit of chloroplast RNA polymerase, confers the ability to recognize promoter sequences on the core enzyme. SIG1 is induced by red and blue light.
Wa8730a009g006850	709.871	-2.9323	2.36918e-36	2.58954e-34	1255.24	164.501	AT4G34350	CLB6, HDR, ISPH	Arabidopsis ISPH is involved in the plastid nonmevalonate pathway of isoprenoid biosynthesis. It was shown to complement the lethal phenotype of E. coli ispH mutant and is therefore most likely encodes a protein with 4-hydroxy-3-methylbut-2-en-1-yl diphosphate reductase activity involved in the last step of mevalonate-independent isopentenyl biosynthesis. Mutant has Albino seedling.
Wa8730a002g007630	1816.76	-2.92517	1.40755e-49	2.17071e-47	3211.55	421.959	AT5G38630	ACYB-1, CYB-1	Encodes for cytochrome b561.
Wa8730a001g009230	689.578	-2.92163	1.8952e-26	1.50254e-24	1219.11	160.047	AT1G50520;AT4G12330;AT5G48000;AT1G13090	CYP705A27, CYP706A7, CYP708, CYP708A2, THAH, THAH1, CYP71B28	member of CYP705A;member of CYP706A;Encodes a member of the CYP708A family of cytochrome P450 enzymes. THAH appears to add a hydroxyl group to the triterpene thalianol. thah1 mutants have an elevated accumulation of thalianol. thah1-1 mutants have longer roots than wild type plants. Thalian-diol and desaturated thalian-diol are lost from the root extracts of thah1-1 mutants. Overexpression of the…
Wa8730a019g002770	308.466	-2.91937	1.84671e-21	1.25243e-19	544.648	72.2827	AT2G41250		Haloacid dehalogenase-like hydrolase (HAD) superfamily protein
Wa8730a014g003560	910.406	-2.90847	3.01945e-44	4.14549e-42	1606.72	214.096	AT3G22370;AT1G32350;AT5G64210	AOX1A, ATAOX1A, AtHSR3, HSR3, AOX1D, AOX2	Encodes AOX1a, an isoform of alternative oxidase that is expressed in rosettes, flowers, and root. The alternative oxidase of plant mitochondria transfers electrons from the ubiquinone pool to oxygen without energy conservations. It is regulated through transcriptional control and by pyruvate. Plays a role in shoot acclimation to low temperature. Also is capable of ameliorating reactive oxygen sp…
Wa8730a014g005140	198.672	-2.88333	5.27405e-15	2.7112e-13	349.78	47.5628
Wa8730a007g001430	26950	-2.86389	3.19835e-71	8.78221e-69	47389.6	6510.43	AT1G44575	CP22, NPQ4, PSBS	Encoding PSII-S (CP22), a ubiquitous pigment-binding protein associated with photosystem II (PSII) of higher plants. Involved in nonphotochemical quenching rather than in photosynthesis. Mutant has a normal violaxanthin cycle but has a limited capacity of quenching singlet excited chlorophylls and is tolerant to lipid peroxidation.
Wa8730a016g000080	7159.03	-2.85027	2.63443e-57	4.94307e-55	12573.8	1744.29	AT1G74470		Encodes for a multifunctional protein with geranylgeranyl reductase activity shown to catalyze the reduction of prenylated geranylgeranyl-chlorophyll a to phytyl-chlorophyll a (chlorophyll a) and free geranylgeranyl pyrophosphate to phytyl pyrophosphate.
Wa8730a016g004110	171.287	-2.82723	5.9641e-13	2.74056e-11	300.243	42.331	AT1G15040;AT5G38200	GAT, GAT1_2.1,	Encodes a nitrogen regulated putative glutamine amidotransferase that represses shoot branching.;Class I glutamine amidotransferase-like superfamily protein
Wa8730a008g005760	90.4135	-2.82377	5.7847e-08	1.88766e-06	158.538	22.2887	AT1G61350		ARM repeat superfamily protein
Wa8730a014g005170	1917.93	-2.81842	3.53393e-56	6.41693e-54	3359.4	476.455
Wa8730a006g006640	233.26	-2.81686	2.1977e-15	1.15078e-13	408.474	58.0459
Wa8730a008g002180	28.6965	-2.79772	0.0017981	0.03539	50.1968	7.19618	AT4G33770	ITPK2	Inositol 1,3,4-trisphosphate 5/6-kinase family protein
Wa8730a006g000650	49.1724	-2.78655	0.000125812	0.0029204	85.7125	12.6322	AT4G21910;AT1G11670;AT2G34360		MATE efflux family protein;MATE efflux family protein;MATE efflux family protein
Wa8730a009g005730	144.494	-2.78529	8.20178e-11	3.25125e-09	252.384	36.6033	AT3G63520;AT3G14440	ATCCD1, ATNCED1, CCD1, NCED1, ATNCED3, NCED3, SIS7, STO1	Encodes a protein with 9-<i>cis</i>-epoxycarotenoid dioxygenase activity. The enzyme was shown to act on a variety of carotenoid including &#946;-carotene, lutein, zeaxanthin, and all-<i>trans</i>-violaxanthin. When those compounds are used as substrates, the major reaction product detected is a C14 dialdehyde: 4,9-dimethyldodeca-2,4,6,8,10-pentaene-1,12-dial. The enzyme did not cleave as efficie…
Wa8730a007g007600	201.317	-2.77602	2.50327e-13	1.18411e-11	351.23	51.404	AT5G64700;AT3G18200;AT3G53210	UMAMIT21, UMAMIT4, UMAMIT6	nodulin MtN21-like transporter family protein;nodulin MtN21-like transporter family protein;nodulin MtN21-like transporter family protein
Wa8730a017g001470	518.72	-2.76063	4.94225e-24	3.66052e-22	903.825	133.616
Wa8730a001g006100	254.69	-2.75483	5.38095e-16	2.91244e-14	443.515	65.8645	AT5G17400;AT1G07030	ER-ANT1,	This gene is predicted to encode an ER-localized adenine nucleotide transporter with six putative transmembrane helices. It appears to act as a ATP:ADP antiporter when expressed in E.coli plasma membranes. Transcript levels for several ER-localized chaperones (e.g. BIP1/2) and other ATP-requiring ER proteins (e.g. CPK2) are reduced in er-ant1 knock-out lines, suggesting a lack of adequate ATP tra…
Wa8730a002g003720	70.3183	-2.74886	7.96929e-06	0.000216189	122.209	18.428
Wa8730a010g005260	255.084	-2.73266	1.24454e-15	6.57796e-14	443.194	66.973	AT5G47560	ATSDAT, ATTDT, TDT	Encodes a tonoplast malate/fumarate transporter.
Wa8730a006g000480	399.345	-2.7311	4.28137e-22	2.9212e-20	694.055	104.636	AT1G62250
Wa8730a002g008510	35.1106	-2.7261	0.00240995	0.0460632	61.1968	9.02444
Wa8730a008g002090	477.783	-2.72561	1.09979e-23	7.93681e-22	830.236	125.33	AT1G75210		HAD-superfamily hydrolase, subfamily IG, 5'-nucleotidase
Wa8730a009g004830	181.273	-2.7224	5.27525e-12	2.28419e-10	314.77	47.7768
Wa8730a007g001540	402.68	-2.72014	4.36382e-21	2.90698e-19	699.314	106.046	AT3G01660		S-adenosyl-L-methionine-dependent methyltransferases superfamily protein
Wa8730a002g003810	447.149	-2.71171	3.28184e-23	2.33842e-21	776.086	118.212	AT5G37260	CIR1, RVE2	Encodes a MYB family transcription factor Circadian 1 (CIR1). Involved in circadian regulation in Arabidopsis.
Wa8730a014g003370	678.632	-2.69494	2.71975e-30	2.3553e-28	1175.77	181.49	AT5G46800;AT1G14560	BOU, CoAc1	Seedling lethal mutation; Mitochondrial Carnitine Acyl Carrier-Like Protein;Encodes a mitochondrial CoA transporter.
Wa8730a011g002420	245.535	-2.66193	1.08103e-14	5.48209e-13	423.883	67.187	AT2G35660;AT2G29720	CTF2A, CTF2B	Encodes a member of a novel gene family with homology to known proteins involved in hydroxylation and oxidation of an aromatic ring.;Encodes CTF2B.
Wa8730a006g003890	6665.73	-2.6577	8.14431e-55	1.43264e-52	11507.2	1824.24
Wa8730a017g004410	114.703	-2.65027	4.13519e-08	1.35726e-06	197.704	31.7021	AT1G12480;AT1G62280	CDI3, OZS1, RCD3, SLAC1, SLAH1	Encodes a membrane protein with 10 predicted transmembrane helices. SLAC1 is a multispanning membrane protein expressed predominantly in guard cells that plays a role in regulating cellular ion homeostasis and S-type anion currents. SLAC1 is important for normal stomatal closure in response to a variety of signals including elevated CO2, ozone, ABA, darkness, and humidity. SLAC1:GFP localizes to …
Wa8730a010g003160	43.6698	-2.64359	0.000757307	0.0157302	75.1255	12.214
Wa8730a011g002520	105.245	-2.63723	1.42164e-07	4.4458e-06	181.229	29.2612	AT5G52810		NAD(P)-binding Rossmann-fold superfamily protein
Wa8730a009g000670	18392.1	-2.63664	1.82719e-39	2.28561e-37	31687.9	5096.31	AT3G54890;AT3G08940	LHCA1, LHCB4.2	Encodes a component of the light harvesting complex associated with photosystem I.;Lhcb4.2 protein (Lhcb4.2, protein involved in the light harvesting complex of photosystem II
Wa8730a001g004310	990.91	-2.62157	1.57653e-32	1.46707e-30	1705.15	276.664	AT5G04950;AT5G56080;AT1G09240;AT1G56430	ATNAS1, NAS1, ATNAS2, NAS2, ATNAS3, NAS3, ATNAS4, NAS4	Encodes a nicotianamide synthase.;Encodes a protein with nicotianamine synthase activity. Its transcript levels rise in roots in response to zinc deficiency and rise in leaves in response to elevated levels of zinc.;Encodes a nicotianamine synthase.;Encodes a protein with nicotianamine synthase activity.
Wa8730a002g004320	122.707	-2.6213	8.27531e-07	2.47118e-05	210.726	34.6874	AT4G34230;AT4G39330	ATCAD5, CAD-5, CAD5, ATCAD9, CAD9	Encodes a catalytically active cinnamyl alcohol dehydrogenase which uses p-coumaryl aldehyde as a preferred substrate. It can also use sinapyl, caffeyl, coniferyl and d-hydroxyconiferyl aldehydes as substrates.;cinnamyl alcohol dehydrogenase 9
Wa8730a017g004570	718.362	-2.61406	9.69677e-29	8.08639e-27	1234.79	201.931
Wa8730a002g005460	707.809	-2.59609	2.84575e-27	2.30485e-25	1214.97	200.647	AT1G64720;AT5G54170	CP5,	membrane related protein CP5;Polyketide cyclase/dehydrase and lipid transport superfamily protein
Wa8730a001g007210	191.061	-2.59066	7.28523e-11	2.91876e-09	327.965	54.1562	AT3G09650;AT5G39710;AT2G18940	CRM3, HCF152, EMB2745,	RNA binding protein involved in the processing of chloroplast psbB-psbT-psbH-petB-petD transcript unit.;Tetratricopeptide repeat (TPR)-like superfamily protein;Tetratricopeptide repeat (TPR)-like superfamily protein
Wa8730a005g008830	12734.8	-2.57955	1.08803e-60	2.35559e-58	21819.5	3650.04	AT1G30020		Protein of unknown function, DUF538
Wa8730a002g000100	42.0651	-2.56937	0.000839674	0.0173133	72.0426	12.0876	AT4G28190;AT2G20825	ULT, ULT1, ULT2	Encodes a novel Cys-rich protein with a B-box like domain that acts as a negative regulator of meristem cell accumulation in inflorescence and floral meristems as loss-of-function ult1 mutations cause inflorescence meristem enlargement, the production of extra flowers and floral organs, and a decrease in floral meristem determinacy. Acts opposite to CLF which represses AG, but preventing depositi…
Wa8730a004g001470	191.726	-2.56817	7.06662e-11	2.86173e-09	328.323	55.1286	AT2G46340;AT4G11110;AT1G53090	SPA1, SPA2, SPA4	Encodes a member of the SPA (suppressor of phyA-105) protein family (SPA1-SPA4). SPA proteins contain an N-terminal serine/threonine kinase-like motif followed by a coiled-coil structure and a C-terminal WD-repeat domain. SPA1 is a PHYA signaling intermediate, putative regulator of PHYA signaling pathway. Light responsive repressor of photomorphogenesis. Involved in regulating circadian rhythms a…
Wa8730a013g002630	169.699	-2.56033	1.16625e-09	4.24908e-08	290.415	48.9827	AT1G07660		Histone superfamily protein
Wa8730a016g003760	57.7548	-2.54431	0.000279182	0.00617491	98.7348	16.7749	AT1G60160		Potassium transporter family protein
Wa8730a001g012380	181.629	-2.54321	5.73547e-10	2.15953e-08	310.356	52.9017	AT2G39980;AT5G01210	,	HXXXD-type acyl-transferase family protein;HXXXD-type acyl-transferase family protein
Wa8730a003g002650	545.701	-2.53691	1.53543e-22	1.08037e-20	930.82	160.582	AT5G39550;AT1G18660	ORTH1, VIM3,	Encodes the VIM3/ORTH1 protein that is similar to VIM1. This protein has an N-terminal PHD domain and two RING domains surrounding an SRA domain. The protein has been shown to bind to methylated cytosines of CG, CNG and CNN motifs via its SRA domain but has a preference for the former. This protein functions as an E3 ubiquitin ligase in vitro with members of the UBC8 family E2s. Either of the two…
Wa8730a004g003570	109.401	-2.52671	3.68451e-07	1.11806e-05	186.457	32.3439
Wa8730a009g001850	1616.42	-2.51878	1.57719e-38	1.86906e-36	2752.7	480.131	AT5G62920;AT1G19050;AT2G41310;AT3G57040	ARR6, ARR7, ARR8, ATRR3, RR3, ARR9, ATRR4	Encodes a Type-A response regulator that is responsive to cytokinin treatment. Its C-ter domain is very short in comparison to other Arabidopsis ARRs (17 total). Arr6 protein is stabilized by cytokinin.;Encodes a member of the Arabidopsis response regulator (ARR) family, most closely related to ARR15. A two-component response regulator protein containing a phosphate accepting domain in the receiv…
Wa8730a009g006150	375.201	-2.5181	6.06709e-17	3.39817e-15	639.104	111.298
Wa8730a012g004010	2994.32	-2.50348	4.35341e-34	4.49639e-32	5090.04	898.598	AT1G48450;AT3G17800	,	Protein of unknown function (DUF760);mRNA level of the MEB5.2 gene (At3g17800) remains unchanged after cutting the inflorescence stem
Wa8730a017g001020	1396.65	-2.49906	3.16218e-28	2.61763e-26	2372.75	420.548	AT1G01490		Heavy metal transport/detoxification superfamily protein
Wa8730a013g003010	1392.76	-2.49903	3.83458e-33	3.78681e-31	2366.56	418.954
Wa8730a010g004010	1392.24	-2.4974	9.10085e-32	8.19659e-30	2365.08	419.411
Wa8730a007g002830	14210.5	-2.4944	3.61499e-39	4.42364e-37	24136.9	4284.15
Wa8730a015g000560	276.009	-2.47385	1.01905e-12	4.57068e-11	467.969	84.0495	AT5G24850	CRY3	Binds flavin adenine dinucleotide and DNA. It does not have photolyase activity, and it is likely to act as photoreceptor. Closely related to Synechocystis cryptochrome.
Wa8730a009g001740	292.673	-2.4582	3.6823e-13	1.72014e-11	494.976	90.3703
Wa8730a010g003920	121.825	-2.45771	1.28009e-06	3.77258e-05	206.269	37.3813
Wa8730a004g007740	1948.24	-2.45659	1.05805e-29	8.95602e-28	3296.76	599.715	AT1G03870	FLA9	fasciclin-like arabinogalactan-protein 9 (Fla9)
Wa8730a012g000060	992.573	-2.44819	4.15297e-27	3.33958e-25	1677.4	307.744	AT1G43800;AT3G02630	FTM1, SAD6,	Plant stearoyl-acyl-carrier-protein desaturase family protein;Plant stearoyl-acyl-carrier-protein desaturase family protein
Wa8730a003g002820	418.648	-2.44692	3.56739e-17	2.02837e-15	707.639	129.658	AT3G29240		Protein of unknown function (DUF179)
Wa8730a002g006080	2522.9	-2.44458	2.51972e-32	2.30626e-30	4262.05	783.751	AT3G19900
Wa8730a007g002850	259.545	-2.44316	2.10275e-12	9.24719e-11	438.348	80.7431	AT5G43260		chaperone protein dnaJ-related
Wa8730a013g002340	142.775	-2.43829	6.12578e-08	1.98744e-06	241.118	44.4316	AT2G45210;AT2G46690;AT4G22620;AT4G12410;AT3G60690	SAG201, SAUR36, SAUR32, SAUR34, SAUR35, SAUR59	SAUR-like auxin-responsive protein family ;SAUR-like auxin-responsive protein family ;SAUR-like auxin-responsive protein family ;SAUR-like auxin-responsive protein family ;SAUR-like auxin-responsive protein family
Wa8730a019g003330	188.674	-2.4251	1.18875e-09	4.31708e-08	318.242	59.106	AT3G17470	ATCRSH, CRSH	Ca2+-activated RelA/spot homolog
Wa8730a017g001690	116.29	-2.42348	9.82235e-07	2.91e-05	196.045	36.5352
Wa8730a009g000960	91.9292	-2.41865	1.15914e-05	0.000306329	154.869	28.9889	AT3G08920		Rhodanese/Cell cycle control phosphatase superfamily protein
Wa8730a003g002280	3024.12	-2.41729	8.35179e-38	9.49742e-36	5094.11	954.126	AT5G67370	CGLD27	Protein of unknown function (DUF1230)
Wa8730a016g003000	11224.2	-2.41607	3.8366e-50	6.08344e-48	18906.2	3542.11	AT1G68530;AT1G25450;AT2G26640;AT1G19440;AT1G71160	CER6, CUT1, G2, KCS6, POP1, CER60, KCS5, KCS11, KCS4, KCS7	Encodes KCS6, a member of the 3-ketoacyl-CoA synthase family involved in the biosynthesis of VLCFA (very long chain fatty acids).;Encodes KCS5, a member of the 3-ketoacyl-CoA synthase family involved in the biosynthesis of VLCFA (very long chain fatty acids).;Encodes KCS11, a member of the 3-ketoacyl-CoA synthase family involved in the biosynthesis of VLCFA (very long chain fatty acids).;Encodes …
Wa8730a003g004660	485.206	-2.41126	1.97396e-17	1.12807e-15	816.676	153.736	AT5G19850		alpha/beta-Hydrolases superfamily protein
Wa8730a015g000810	1779.21	-2.4063	1.54052e-20	1.00832e-18	2992.81	565.6	AT4G25820;AT4G30290;AT5G48070;AT2G18800;AT5G57550	ATXTH14, XTH14, XTR9, ATXTH19, XTH19, ATXTH20, XTH20, ATXTH21, XTH21, XTH25, XTR3	Encodes a xyloglucan endotransglycosylase with a clear preference for non-fucosylated xyloglucan polymer.;Encodes a xyloglucan endotransglucosylase/hydrolase with only only the endotransglucosylase (XET; EC 2.4.1.207) activity towards xyloglucan and non-detectable endohydrolytic (XEH; EC 3.2.1.151) activity. Expressed throughout both the main and the lateral root, with intensive expression at the…
Wa8730a007g006090	2177.35	-2.39599	4.52177e-33	4.42662e-31	3658.98	695.734	AT4G09350	CRRJ, DJC75, NdhT	Chaperone DnaJ-domain superfamily protein
Wa8730a016g002670	255.137	-2.38552	2.56458e-11	1.06539e-09	428.266	82.0073	AT1G23110;AT1G70900	,	;
Wa8730a004g004080	882.343	-2.36751	3.16714e-24	2.37704e-22	1478.4	286.282	AT1G16500;AT1G79160	,	;
Wa8730a019g001920	468.061	-2.36548	1.47404e-16	8.09502e-15	783.787	152.335
Wa8730a001g010060	275.656	-2.36351	2.12791e-11	8.97228e-10	461.359	89.9522
Wa8730a014g004960	494.024	-2.35338	1.23294e-15	6.54735e-14	826.523	161.525	AT4G22690;AT4G12320;AT2G45580;AT3G61040;AT5G04630	CYP706A1, CYP706A6, CYP76C3, CYP76C7, CYP77A9	member of CYP706A;member of CYP706A;member of CYP76C;encodes a protein with cytochrome P450 domain;member of CYP77A
Wa8730a011g001180	1135.45	-2.34692	1.99884e-25	1.52047e-23	1897.5	373.394	AT5G16650		Chaperone DnaJ-domain superfamily protein
Wa8730a001g012600	123.547	-2.34176	1.86335e-06	5.40661e-05	206.435	40.6584	AT2G39190	ATATH8	member of ATH subfamily
Wa8730a013g003690	119.152	-2.33838	6.44015e-06	0.000176837	198.715	39.5887	AT5G66380;AT2G17270	ATFOLT1, FOLT1, MPT1, PHT3, 3	Encodes a folate transporter that is located in the chloroplast envelope and is able to mediate exogenous folate uptake when expressed in E. coli. However, this is not the sole folate transporter for chloroplasts as null mutants of this gene have no discernible phenotype when grown under folate-sufficient conditions and contained wild-type levels of folates in leaves.;Encodes a mitochondrial phos…
Wa8730a015g002040	321.596	-2.33768	7.39393e-13	3.35649e-11	537.009	106.183	AT4G30950	FAD6, FADC, SFD4	Chloroplastic enzyme responsible for the synthesis of 16:2 and 18:2 fatty acids from galactolipids, sulpholipids and phosphatidylglycerol. Uses ferredoxin as electron donor. Gene mutation resulted in reduced level of unsaturated fatty acids leading to susceptibility to photoinhibition.
Wa8730a002g005400	1571.32	-2.3338	3.31813e-25	2.50708e-23	2621.79	520.857	AT1G32900	GBSS1	UDP-Glycosyltransferase superfamily protein
Wa8730a013g001050	273.882	-2.32796	1.84661e-08	6.2243e-07	457.315	90.4484	AT1G01580;AT5G23990	ATFRO2, FRD1, FRO2, ATFRO5, FRO5	Encodes the low-iron-inducible ferric chelate reductase responsible for reduction of iron at the root surface. It is likely to be the major Fe(III) chelate reductase in Arabidopsis iron metabolism. Coordinately regulated with IRT1, the major transporter responsible for high-affinity iron uptake from the soil, at both transcriptional and posttranscriptional levels. Steady state mRNA levels are reg…
Wa8730a010g001640	58.666	-2.32449	0.00109354	0.0220234	97.9704	19.3617	AT4G27970;AT5G24030	SLAH2, SLAH3	Encodes a protein with ten predicted transmembrane helices. The SLAH2 protein has similarity to the SLAC1 protein involved in ion homeostasis in guard cells. But, it is not expressed in guard cells and cannot complement a slac1-2 mutant suggesting that it performs a different function. SLAH2:GFP localizes to the plasma membrane.;Encodes a protein with ten predicted transmembrane helices. The SLAH…
Wa8730a008g000010	306.053	-2.32448	1.18341e-11	5.00858e-10	510.514	101.593
Wa8730a014g000500	415.939	-2.31314	2.42544e-13	1.15213e-11	692.137	139.742	AT1G27480		alpha/beta-Hydrolases superfamily protein
Wa8730a010g004710	272.603	-2.30997	1.0798e-10	4.26538e-09	453.504	91.7026	AT5G10730;AT5G15910	,	NAD(P)-binding Rossmann-fold superfamily protein;NAD(P)-binding Rossmann-fold superfamily protein
Wa8730a002g009470	1703.55	-2.30898	5.73971e-30	4.93264e-28	2835.11	571.989	AT5G18930	BUD2, SAMDC4	Adenosylmethionine decarboxylase family protein
Wa8730a005g000380	1627.96	-2.30704	3.35803e-26	2.62532e-24	2708.13	547.794	AT1G52590		Putative thiol-disulphide oxidoreductase DCC
Wa8730a010g004150	245.583	-2.30616	5.73359e-10	2.15953e-08	408.4	82.7658
Wa8730a003g000010	354.049	-2.30387	1.66928e-12	7.36969e-11	588.981	119.116
Wa8730a007g001450	1329.71	-2.30299	3.05966e-06	8.74256e-05	2211.01	448.399	AT3G48360;AT5G63160	ATBT2, BT2, BT1	encodes a protein (BT2) that is an essential component of the TAC1-mediated telomerase activation pathway. Acts redundantly with BT3 and BT1 during female gametophyte development and with BT3 during male gametophyte development. BT2 also mediates multiple responses to nutrients, stresses, and hormones.;BTB and TAZ domain protein. Short-lived nuclear-cytoplasmic protein targeted for degradation by…
Wa8730a007g007240	367.807	-2.30253	2.26879e-12	9.93852e-11	611.684	123.93	AT1G72120;AT1G22540	AtNPF5.14, NPF5.14,	Major facilitator superfamily protein;Major facilitator superfamily protein
Wa8730a004g000450	56.2046	-2.29916	0.00117222	0.0234819	93.4755	18.9337	AT3G04790;AT1G71100	EMB3119, RSW10	Ribose 5-phosphate isomerase, type A protein;Encodes a ribose 5-phosphate isomerase involved in the formation of uridine used for the synthesis of UDP-sugars. Mutants of this gene are affected in cellulose biosynthesis.
Wa8730a004g002990	707.439	-2.29562	9.14493e-20	5.78391e-18	1175.55	239.331
Wa8730a009g006790	827.689	-2.2893	1.94548e-21	1.31151e-19	1374.28	281.098	AT1G58440;AT2G22830;AT4G37760	DRY2, SQE1, XF1, SQE2, SQE3	Encodes a putative protein that has been speculated, based on sequence similarities, to have squalene monooxygenase activity.;squalene epoxidase 2;squalene epoxidase 3
Wa8730a006g000580	634.061	-2.28835	1.47348e-17	8.50688e-16	1052.94	215.185	AT2G32480;AT1G05140	ARASP,	Metalloprotease essential for plastid development. Located in the inner membrane of chloroplasts.;Peptidase M50 family protein
Wa8730a012g005100	887.876	-2.28395	2.84999e-20	1.84398e-18	1472.84	302.91	AT1G34200;AT4G09670	,	Glyceraldehyde-3-phosphate dehydrogenase-like family protein;Oxidoreductase family protein
Wa8730a006g007470	220.44	-2.27527	4.44576e-09	1.56408e-07	365.368	75.5113
Wa8730a015g001410	2048.14	-2.26557	1.78351e-27	1.45498e-25	3391.02	705.255	AT4G28025
Wa8730a014g004390	9533.11	-2.26523	1.05611e-38	1.27312e-36	15783.1	3283.17	AT2G01140;AT2G16460	AtFBA3, FBA3, PDE345,	Aldolase superfamily protein;Protein of unknown function (DUF1640)
Wa8730a007g008970	82.6008	-2.25716	0.000155068	0.00356276	136.631	28.5708
Wa8730a008g002170	644.545	-2.25291	7.87092e-16	4.21956e-14	1065.11	223.976	AT4G33770	ITPK2	Inositol 1,3,4-trisphosphate 5/6-kinase family protein
Wa8730a001g008310	10452.8	-2.24036	1.2792e-30	1.13395e-28	17253.4	3652.07	AT1G15820	CP24, LHCB6	Lhcb6 protein (Lhcb6), light harvesting complex of photosystem II.
Wa8730a008g000020	217.067	-2.23244	3.14008e-07	9.58022e-06	357.543	76.5906
Wa8730a007g005570	944.433	-2.22801	8.49859e-19	5.22826e-17	1556.38	332.483	AT1G65560;AT3G03080;AT3G59845		Zinc-binding dehydrogenase family protein;Zinc-binding dehydrogenase family protein;Zinc-binding dehydrogenase family protein
Wa8730a005g003670	212.445	-2.22752	2.56164e-08	8.55754e-07	350.274	74.6166	AT3G61580;AT2G46210	AtSLD1, SLD1, AtSLD2, SLD2	Fatty acid/sphingolipid desaturase;Fatty acid/sphingolipid desaturase
Wa8730a009g001620	852.556	-2.22347	4.99615e-17	2.82647e-15	1404.46	300.654	AT5G05270	AtCHIL, CHIL	Chalcone-flavanone isomerase family protein
Wa8730a019g001460	5316.83	-2.21592	1.8934e-33	1.90321e-31	8750.58	1883.08	AT2G30490;AT2G40890	ATC4H, C4H, CYP73A5, REF3, CYP98A3	Encodes a cinnamate-4-hydroxylase. Mutations in this gene impact phenylpropanoid metabolism, growth and development.;encodes coumarate 3-hydroxylase (C3H), a P450-dependent monooxygenase. Involved in lignin biosynthesis and flavonoid biosynthesis. Also affects the biosynthesis of coumarins such as scopoletin and scopolin as a branching-out-pathway from the phenylpropanoid acid level.
Wa8730a006g002220	239.466	-2.20727	4.05936e-08	1.33626e-06	394.027	84.9053	AT3G26570	ORF02, PHT2, 1	low affinity phosphate transporter
Wa8730a014g001630	4571.54	-2.20213	3.53321e-31	3.1569e-29	7511.22	1631.87
Wa8730a001g009170	98.3338	-2.19237	0.000143475	0.00331671	161.455	35.2127	AT1G07250	UGT71C4	UDP-glucosyl transferase 71C4
Wa8730a005g008840	1808.56	-2.18853	7.21398e-24	5.30817e-22	2965.99	651.118
Wa8730a010g004190	353.283	-2.18837	3.71302e-11	1.52559e-09	579.369	127.197	AT1G67980;AT4G26220	CCOAMT, CCoAOMT7	Encodes S-adenosyl-L-methionine: transcaffeoyl Coenzyme A 3-O-methyltransferase.;Encodes a caffeoyl-coenzyme A O-methyltransferase (CCoAOMT)-like protein with a strong preference for methylating the para position of flavanones and dihydroflavonols, whereas flavones and flavonols are methylated in the meta-position.
Wa8730a007g006690	188.67	-2.18747	6.8664e-07	2.06139e-05	309.696	67.6442	AT3G19700;AT1G77280;AT2G16750;AT5G63940;AT1G21590	IKU2	Encodes leucine rich repeat (LRR) kinase. Iku2-3 identified in a screen for mutants with abnormal endosperm. Sporophytic recessive mutants have reduced embryo and endosperm size. Seed size is also reduced and the shape is abnormal suggesting an interaction between the endosperm and cell elongation in the integuments.;Protein kinase protein with adenine nucleotide alpha hydrolases-like domain;Prot…
Wa8730a009g000490	70257.7	-2.18169	1.52469e-32	1.44244e-30	115137	25378.9	AT2G39730;AT5G59250	RCA,	Rubisco activase, a nuclear-encoded chloroplast protein that consists of two isoforms arising from alternative splicing in most plants. Required for the light activation of rubisco.;Major facilitator superfamily protein
Wa8730a002g000120	220.557	-2.17174	8.1937e-08	2.61317e-06	360.799	80.3151	AT5G54280;AT1G50360;AT4G27370	ATM2, ATM4, ATMYOS1, ATVIIIA, VIIIA, ATVIIIB, VIIIB	Type VII myosin gene;member of Myosin-like proteins;member of Myosin-like proteins
Wa8730a001g000980	266.302	-2.16964	8.06644e-09	2.78564e-07	435.913	96.6914	AT5G26820	ATIREG3, IREG3, MAR1, RTS3	Mutations in MAR1 confer resistance, while MAR1 overexpression causes hypersensitivity to multiple aminoglycoside antibiotics. Localizes to the chloroplast envelope. MAR1 may act as a plastid transporter involved in cellular iron homeostasis.
Wa8730a007g005080	24311.5	-2.16908	5.34277e-26	4.1482e-24	39777.7	8845.2	AT4G10340	LHCB5	photosystem II encoding the light-harvesting chlorophyll a/b binding protein CP26 of the antenna system of the photosynthetic apparatus
Wa8730a004g007640	491.255	-2.16713	1.55792e-12	6.90515e-11	803.481	179.029	AT4G32770	ATSDX1, VTE1	Tocopherol cyclase involved in tocopherol (vitamin E)synthesis. VTE1 over-expressing plants have increased tocopherol indicating VTE1 is a major limiting factor in tocopherol synthesis. Mutants defective in this gene accumulate high amounts of zeaxanthin in conditions of high light or low temperature. Plays a role in the adaptation to low temperature stress, notably phloem loading.
Wa8730a001g012630	76.2079	-2.16572	0.000875314	0.0179169	124.681	27.7345	AT5G05690	CBB3, CPD, CYP90, CYP90A, CYP90A1, DWF3	Encodes a member of the CP90A family, a cytochrome P450 monooxygenase which converts 6-deoxocathasterone to 6-deoxoteasterone in the late C6 oxidation pathway and cathasterone to teasterone in the early C6 oxidation pathway of brassinolide biosynthesis. Expressed in cotyledons and leaves. Mutants display de-etiolation and derepression of light-induced genes in the dark, dwarfism, male sterility a…
Wa8730a006g002990	364.163	-2.16167	5.47864e-10	2.08373e-08	594.876	133.45	AT4G13830	DJC26, J20	DnaJ-like protein (J20); nuclear gene
Wa8730a016g004770	102.228	-2.1604	0.000120567	0.00281023	167.084	37.3715	AT1G53830;AT3G14310;AT4G33230;AT5G20860;AT3G43270;AT2G26450;AT1G02810	ATPME2, PME2, ATPME3, OZS2, PME3,	encodes a pectin methylesterase;encodes a pectin methylesterase, targeted by a cellulose binding protein (CBP) from the parasitic nematode Heterodera schachtii during parasitism.;Plant invertase/pectin methylesterase inhibitor superfamily;Plant invertase/pectin methylesterase inhibitor superfamily;Plant invertase/pectin methylesterase inhibitor superfamily;Plant invertase/pectin methylesterase in…
Wa8730a005g004030	241.944	-2.15452	3.61164e-08	1.19588e-06	394.977	88.9117	AT4G27940;AT2G46320	ATMTM1, MTM1,	manganese tracking factor for mitochondrial SOD2;Mitochondrial substrate carrier family protein
Wa8730a001g000190	208.692	-2.15186	1.44707e-07	4.50031e-06	340.686	76.6977	AT4G01660	ABC1, ATABC1, ATATH10	Encodes an ABC1-like protein, member of the ATH subfamily; putative ABC transporter; isolated by functional complementation of a yeast abc1 mutant
Wa8730a010g000820	188.965	-2.15072	2.22728e-06	6.41298e-05	308.234	69.6959
Wa8730a005g001570	286.175	-2.15057	1.29349e-07	4.06763e-06	467.586	104.763	AT5G12020	HSP17.6II	17.6 kDa class II heat shock protein
Wa8730a015g000950	746.077	-2.14742	9.81974e-15	5.00229e-13	1217.04	275.118	AT5G57340
Wa8730a010g001470	136.642	-2.14634	2.09663e-05	0.000543869	222.725	50.558	AT5G25770		alpha/beta-Hydrolases superfamily protein
Wa8730a010g002840	269.722	-2.12626	7.68852e-08	2.47307e-06	439.242	100.202
Wa8730a011g002740	999.637	-2.11937	7.16342e-12	3.07808e-10	1624.51	374.765
Wa8730a005g000060	1372.72	-2.11841	9.17655e-21	6.0415e-19	2231.71	513.739	AT2G25490;AT5G25350	EBF1, FBL6, EBF2	Encodes an F-box protein involved in the ubiquitin/proteasome-dependent proteolysis of EIN3.;Arabidopsis thaliana EIN3-binding F-box protein 2 (EBF2) mRNA. Part of the SCF complex, it is located in the nucleus and is involved in the ethylene-response pathway.
Wa8730a002g007360	101.477	-2.11599	0.000195911	0.00444671	164.951	38.0036
Wa8730a015g002930	80.1042	-2.10891	0.000881524	0.0180113	130.033	30.1753	AT5G48490		Encodes a protein with similarity to a lipid transfer protein that may contribute to systemic acquired resistance (SAR).
Wa8730a001g002360	661.062	-2.10553	6.61897e-14	3.22582e-12	1073	249.124	AT4G31530		NAD(P)-binding Rossmann-fold superfamily protein
Wa8730a004g000520	873.133	-2.10182	2.03533e-14	1.01839e-12	1416.52	329.75	AT2G34430	LHB1B1, LHCB1.4	Photosystem II type I chlorophyll a/b-binding protein
Wa8730a001g010910	126.349	-2.098	0.000119202	0.00278418	204.591	48.1074	AT5G02580;AT3G55240	,	Plant protein 1589 of unknown function;Overexpression leads to PEL (Pseudo-Etiolation in Light) phenotype.
Wa8730a015g001540	1633.24	-2.08944	2.40265e-21	1.61006e-19	2644.87	621.614	AT4G30210	AR2, ATR2	Encodes NADPH-cytochrome P450 reductase that catalyzes the first oxidative step of the phenylpropanoid general pathway.
Wa8730a013g004000	618.598	-2.08929	2.59306e-13	1.22145e-11	1002.04	235.16	AT3G19800		Encodes the DUF177B version of the two DUF177 proteins in Arabidopsis. This version differs from DUF177A in containing a 23 aa insertion compared to the DUF177A sequence.
Wa8730a001g000820	97.4071	-2.08526	0.000791555	0.0163811	157.909	36.9048	AT3G06483	ATPDHK, PDK	Pyruvate dehydrogenase kinase (PDK) specifically phosphorylates the E1&#945; subunit of the pyruvate dehydrogenase complex (PDC) on a Ser residue using ATP as a phosphate donor. PDK is a unique type of protein kinase having a His-kinase-like sequence but Ser-kinase activity. Site-directed mutagenesis and structural analysis indicate that PDK belongs to the GHKL superfamily.
Wa8730a011g005590	2467.92	-2.08113	4.98044e-20	3.18399e-18	3991.71	944.129	AT5G57800	CER3, FLP1, WAX2, YRE	encodes a transmembrane protein with similarity to the sterol desaturase family at the N-terminus and to the short-chain dehydrogenase/reductase family at the C-terminus. Mutant analyses indicate this protein is involved in cuticle membrane and wax biosynthesis.
Wa8730a010g004860	1420.5	-2.08103	4.92279e-20	3.1669e-18	2297.83	543.175	AT3G07700;AT5G24970	,	ABC1K7 is a member of an atypical protein kinase family that is induced by salt stress. Loss of function mutations affect the metabolic profile of chloroplast lipids. It appears to function along with ABC1K8 in mediating lipid membrane changes in response to stress.;Protein kinase superfamily protein
Wa8730a019g002280	647.971	-2.07794	8.35454e-12	3.55749e-10	1048.31	247.636	AT4G27830;AT1G45191;AT3G09260;AT5G25980	AtBGLU10, BGLU10, BGLU1, BGLU23, LEB, PSR3.1, PYK10, BGLU37, TGG2	Encodes a beta-glucosidase that may be responsible for acyl-glucose-dependent anthocyanin glucosyltransferase activity in Arabidopsis. In vitro efforts to demonstrate AAGT activity for BGLU10 have been unsuccessful but experiments with mutants in this gene suggest at least an indirect involvement in anthocyanin formation.;beta-glucosidase related protein, similar to beta-glucosidase GI:3820531 fr…
Wa8730a010g002800	449.259	-2.07529	5.39802e-11	2.20184e-09	726.062	172.455	AT5G14760	AO, FIN4	At5g14760 encodes for L-aspartate oxidase involved in the early steps of NAD biosynthesis. In contrary to the EC 1.4.3.16 (l-aspartate oxidase - deaminating) the enzyme catalyzes the reaction L-aspartate + O2 = iminoaspartate (alpha-iminosuccinate) + H2O2
Wa8730a001g006320	266.983	-2.07501	5.90285e-08	1.92065e-06	431.43	102.536	AT2G37860;AT3G56140;AT2G40400	LCD1	Encodes a protein of unknown function. Mutants have pale leaves, lower cell density in the palisade parenchyma and increased sensitivity to ozone and virulent Pseudomonas syringae;Protein of unknown function (DUF399 and DUF3411);Encodes a chloroplast localized protein of unknown function that is involved in regulation of chloroplast development.
Wa8730a001g003660	188.442	-2.05574	8.11462e-06	0.000219602	303.561	73.3232	AT3G14310;AT2G26450	ATPME3, OZS2, PME3,	encodes a pectin methylesterase, targeted by a cellulose binding protein (CBP) from the parasitic nematode Heterodera schachtii during parasitism.;Plant invertase/pectin methylesterase inhibitor superfamily
Wa8730a009g000900	130.127	-2.03919	0.000100986	0.00237846	209.395	50.8595	AT2G36840;AT2G39570	ACR10, ACR9	Encodes a ACT domain-containing protein. The ACT domain, named after bacterial aspartate kinase, chorismate mutase and TyrA (prephenate dehydrogenase), is a regulatory domain that serves as an amino acid-binding site in feedback-regulated amino acid metabolic enzymes.;Encodes a ACT domain-containing protein. The ACT domain, named after bacterial aspartate kinase, chorismate mutase and TyrA (preph…
Wa8730a005g001190	1652.07	-2.03543	9.2728e-18	5.38109e-16	2656.69	647.443
Wa8730a005g004350	386.007	-2.03204	5.46617e-09	1.89933e-07	620.291	151.723	AT3G12685;AT3G61770	,	Acid phosphatase/vanadium-dependent haloperoxidase-related protein;Acid phosphatase/vanadium-dependent haloperoxidase-related protein
Wa8730a004g002900	11770.8	-2.03067	6.97188e-27	5.56662e-25	18912.4	4629.13	AT4G33010;AT2G26080	AtGLDP1, GLDP1, AtGLDP2, GLDP2	glycine decarboxylase P-protein 1;glycine decarboxylase P-protein 2
Wa8730a014g000250	1712.79	-2.02761	7.16611e-17	3.99387e-15	2750.46	675.128	AT2G14110		Haloacid dehalogenase-like hydrolase (HAD) superfamily protein
Wa8730a005g004200	113.424	-2.02674	0.000331795	0.00729561	182.271	44.5775	AT4G01070;AT1G01420;AT5G26310	GT72B1, UGT72B1, UGT72B3, UGT72E3	the glycosyltransferase (UGT72B1) is involved in metabolizing xenobiotica (chloroaniline and chlorophenole). Comparison between wild type and knock-out mutant demonstrates the central role of this gene for metabolizing chloroaniline but significantly less for chlorophenole. The glucosyltransferase preferred UDP-xylose over UDP-glucose indicating its (additional) functioning as a xylosyltransferas…
Wa8730a010g004740	569.726	-2.02176	1.98587e-10	7.70927e-09	914.677	224.774	AT4G09600;AT1G10588	GASA3,	One of GASA gene family which is related to a GA-stimulated transcript (GAST) from tomato.;Encodes a Gibberellin-regulated GASA/GAST/Snakin family protein
Wa8730a003g005590	583.025	-2.01892	8.37391e-12	3.55749e-10	935.315	230.735	AT1G75460;AT1G19740	,	ATP-dependent protease La (LON) domain protein;ATP-dependent protease La (LON) domain protein
Wa8730a011g000300	724.134	-2.01231	3.57131e-13	1.67524e-11	1160.61	287.662
Wa8730a007g008590	823.862	-2.01174	1.29205e-12	5.74937e-11	1320.01	327.718	AT3G11620		alpha/beta-Hydrolases superfamily protein
Wa8730a013g004240	1777.32	-2.01171	1.30731e-16	7.21458e-15	2848.33	706.315	AT5G54190;AT4G27440	PORA, PORB	light-dependent NADPH:protochlorophyllide oxidoreductase A;light-dependent NADPH:protochlorophyllide oxidoreductase B
Wa8730a001g012670	592.529	-2.0108	2.26627e-11	9.52003e-10	949.626	235.432	AT5G01410;AT2G38230	ATPDX1, ATPDX1.3, PDX1, PDX1.3, RSR4, ATPDX1.1, PDX1.1	Encodes a protein predicted to function in tandem with PDX2 to form glutamine amidotransferase complex with involved in vitamin B6 biosynthesis.;Encodes a protein predicted to function in tandem with PDX2 to form glutamine amidotransferase complex with involved in vitamin B6 biosynthesis.
Wa8730a011g000060	1324.14	-2.01004	5.97478e-17	3.3632e-15	2121.4	526.887	AT5G17670		alpha/beta-Hydrolases superfamily protein
Wa8730a003g004680	245.569	-2.00079	9.16237e-07	2.72884e-05	392.862	98.2765
Wa8730a005g008980	96.1631	-1.97107	0.00236579	0.0453731	153.272	39.0539	AT1G68530;AT1G25450;AT5G43760	CER6, CUT1, G2, KCS6, POP1, CER60, KCS5, KCS20	Encodes KCS6, a member of the 3-ketoacyl-CoA synthase family involved in the biosynthesis of VLCFA (very long chain fatty acids).;Encodes KCS5, a member of the 3-ketoacyl-CoA synthase family involved in the biosynthesis of VLCFA (very long chain fatty acids).;Encodes KCS20, a member of the 3-ketoacyl-CoA synthase family involved in the biosynthesis of VLCFA (very long chain fatty acids).
Wa8730a006g007170	331.273	-1.96246	1.26964e-07	4.00381e-06	527.112	135.434
Wa8730a007g006310	519.057	-1.95984	2.56549e-09	9.16898e-08	825.574	212.54	AT1G77090		Mog1/PsbP/DUF1795-like photosystem II reaction center PsbP family protein
Wa8730a001g001100	215.28	-1.95316	9.77317e-06	0.000260726	342.067	88.4935
Wa8730a014g001280	1287.98	-1.95235	1.06104e-13	5.10477e-12	2046.89	529.065	AT3G13110	ATSERAT2, 2, SAT-1, SAT-A, SAT-M, SAT3, SERAT2, 2	Encodes a mitochondrial serine O-acetyltransferase involved in sulfur assimilation and cysteine biosynthesis. Expressed in the vascular system.
Wa8730a012g003710	623.159	-1.95234	7.34522e-11	2.93236e-09	990.562	255.756
Wa8730a018g003210	997.588	-1.9516	4.29693e-13	1.99073e-11	1585.09	410.085	AT4G15560	AtCLA1, CLA, CLA1, DEF, DXPS2, DXS, DXS1	Encodes a protein with 1-deoxyxylulose 5-phosphate synthase activity involved in the MEP pathway. It is essential for chloroplast development in Arabidopsis
Wa8730a004g008480	3448.51	-1.94361	1.56014e-19	9.81234e-18	5474.13	1422.9	AT3G24500	ATMBF1C, MBF1C	One of three genes in A. thaliana encoding multiprotein bridging factor 1, a highly conserved transcriptional coactivator. May serve as a bridging factor between a bZIP factor and TBP. Its expression is specifically elevated in response to pathogen infection, salinity, drought, heat, hydrogen peroxide, and application of abscisic acid or salicylic acid. Constitutive expression enhances the tolera…
Wa8730a013g001260	119.504	-1.94331	0.00189012	0.0370069	189.374	49.6341	AT2G36050	ATOFP15, OFP15	ovate family protein 15
Wa8730a005g008000	1837.83	-1.94278	5.18578e-16	2.82036e-14	2916.49	759.158	AT1G53670	ATMSRB1, MSRB1	methionine sulfoxide reductase B 1
Wa8730a016g003740	94.5661	-1.94133	0.00222393	0.0427984	150.146	38.9858	AT4G33530;AT1G70300;AT1G60160	KUP5, KUP6,	potassium transporter;potassium transporter;Potassium transporter family protein
Wa8730a001g011080	118.284	-1.92915	0.000940769	0.0191176	187.518	49.0508	AT5G59820;AT2G37430;AT2G28710;AT3G53600;AT3G46070	AtZAT12, RHL41, ZAT12, ZAT11,	Encodes a zinc finger protein involved in high light and cold acclimation. Overexpression of this putative transcription factor increases the expression level of 9 cold-responsive genes and represses the expression level of 15 cold-responsive genes, including CBF genes. Also, lines overexpressing this gene exhibits a small but reproducible increase in freeze tolerance. Because of the repression o…
Wa8730a009g002910	292.758	-1.92901	1.38471e-06	4.05966e-05	463.696	121.82	AT1G19190		alpha/beta-Hydrolases superfamily protein
Wa8730a005g002880	269.674	-1.92827	1.22488e-05	0.000321439	426.719	112.63	AT2G19900;AT5G11670;AT5G25880;AT1G79750	ATNADP-ME1, NADP-ME1, ATNADP-ME2, NADP-ME2, ATNADP-ME3, NADP-ME3, ATNADP-ME4, NADP-ME4	The malic enzyme (EC 1.1.1.40) encoded by AtNADP-ME1 is expressed in response to developmental and cell-specific signals. The enzyme is active in vitro and appears to function as a homohexamer or homooctamer. It is believed to be a cytosolic protein.;The malic enzyme (EC 1.1.1.40) encoded by AtNADP-ME2 is presumably a cytosolic enzyme involved in malate metabolism and possibly assisting the oxida…
Wa8730a001g004860	216.757	-1.92597	6.52293e-05	0.00156913	343.572	89.9427	AT4G11370	RHA1A	Encodes a putative RING-H2 finger protein RHA1a.
Wa8730a004g008130	1306.7	-1.92398	3.46333e-14	1.7101e-12	2068.56	544.838
Wa8730a020g003200	1439.39	-1.92381	3.42354e-14	1.69789e-12	2277.9	600.881
Wa8730a011g005810	1427.34	-1.92176	5.42285e-15	2.77502e-13	2258.6	596.077	AT5G57345		OXR is a single copy gene in Arabidopsis. It is localized to the ER. It is expressed throughout the plant and expression is induced in response to abiotic stress. While the function of OXR is unknown, overexpression results in increased abiotic stress tolerance and increased ascorbic acid content.
Wa8730a020g002710	186.579	-1.92109	5.22972e-05	0.00127714	295.138	78.0202
Wa8730a007g006880	481.452	-1.91457	1.03129e-08	3.52894e-07	760.838	202.067	AT1G44000
Wa8730a011g003500	542.457	-1.91288	2.52787e-09	9.06328e-08	857.446	227.467
Wa8730a001g005760	425.59	-1.90785	3.46985e-08	1.15232e-06	672.073	179.107	AT5G05200		Protein kinase superfamily protein
Wa8730a020g003130	706.054	-1.90712	3.50897e-10	1.35288e-08	1115	297.105
Wa8730a004g003520	662.32	-1.90173	5.84111e-10	2.19197e-08	1044.7	279.941	AT5G11260	HY5, TED	Basic leucine zipper (bZIP) transcription factor. Nuclear localization. Involved in light-regulated transcriptional activation of G-box-containing promoters. Negatively regulated by Cop1. Although cytokinins do not appear to affect the gene's promoter activity, they appear to stabilize the protein. HY5 plays a role in anthocyanin accumulation in far-red light and blue light, but not in red light …
Wa8730a004g005340	314.961	-1.89567	4.34418e-06	0.000121056	496.122	133.8	AT4G39210;AT2G21590	APL3, APL4	Encodes the large subunit of ADP-Glucose Pyrophosphorylase which catalyzes the first, rate limiting step in starch biosynthesis. The large subunit plays a regulatory role whereas the small subunit (ApS) is the catalytic isoform. Four isoforms (ApL1-4) have been identified. ApL3 is the major large subunit isoform present in inflorescences, fruits and roots.;Encodes the large subunit of ADP-glucose…
Wa8730a015g003310	358.54	-1.89548	5.06737e-07	1.52945e-05	564.959	152.121	AT5G10770		Eukaryotic aspartyl protease family protein
Wa8730a003g000920	822.543	-1.89379	8.25881e-10	3.03849e-08	1296.78	348.305
Wa8730a001g003240	460.464	-1.88743	1.1259e-07	3.56049e-06	725.298	195.629	AT1G23330		alpha/beta-Hydrolases superfamily protein
Wa8730a006g002480	5788.59	-1.88307	2.06924e-18	1.26606e-16	9108.23	2468.96	AT4G20360	ATRAB8D, ATRABE1B, RABE1b	RAB GTPase homolog E1B
Wa8730a014g001930	1491.25	-1.88263	4.70606e-14	2.30352e-12	2346.43	636.065	AT1G06760;AT2G30620	,	winged-helix DNA-binding transcription factor family protein;winged-helix DNA-binding transcription factor family protein
Wa8730a008g003840	879.229	-1.8744	2.79251e-11	1.15581e-09	1381.66	376.798	AT4G19690;AT3G12750;AT2G30080;AT1G31260;AT2G32270;AT1G05300;AT2G04032	ATIRT1, IRT1, AtZIP1, ZIP1, ATZIP6, ZIP6, ZIP10, ZIP3, ZIP5, ZIP7	Fe(II) transport protein (IRT1);A member of Zrt- and Irt-related protein (ZIP) family. transcript is induced in response to zinc deficiency in the root.;member of Fe(II) transporter isolog family. Gene expression is not regulated by iron, copper, or zinc deficiency or excess.;member of Fe(II) transporter isolog family;A member of Zrt- and Irt-related protein (ZIP) family. transcript is induced in…
Wa8730a002g005560	299.191	-1.86912	3.5834e-06	0.000101617	469.843	128.539	AT1G42470;AT4G38350	,	Patched family protein;Patched family protein
Wa8730a017g003860	6008.98	-1.86368	4.22805e-13	1.96692e-11	9427.45	2590.51	AT1G29930;AT5G54270	AB140, CAB1, CAB140, LHCB1.3, LHCB3, LHCB3*1	Subunit of light-harvesting complex II (LHCII),which absorbs light and transfers energy to the photosynthetic reaction center.;Lhcb3 protein is a component of the main light harvesting chlorophyll a/b-protein complex of Photosystem II (LHC II).
Wa8730a012g004670	1113.08	-1.86097	1.46851e-10	5.74043e-09	1746.15	480.005	AT4G39980;AT4G33510;AT1G22410	DHS1, DHS2,	Encodes a 2-deoxy-D-arabino-heptulosonate 7-phosphate (DAHP) synthase, which catalyzes the first committed step in aromatic amino acid biosynthesis. Gene expression is induced by wounding and pathogenic bacteria Pseudomonas syringae.;Enzyme catalyzing the first committed step in aromatic amino acid biosynthesis;Class-II DAHP synthetase family protein
Wa8730a011g000240	221.377	-1.86064	4.32288e-05	0.00106726	347.191	95.5633	AT1G31350	KUF1	KAR-UP F-box 1
Wa8730a015g003560	3160.33	-1.85917	7.41739e-16	3.99545e-14	4954.87	1365.8
Wa8730a015g000050	883.667	-1.83832	5.89748e-10	2.20578e-08	1381.35	385.988	AT5G58110;AT3G13040	,	chaperone binding;ATPase activators;myb-like HTH transcriptional regulator family protein
Wa8730a003g000580	185.57	-1.8331	0.000241503	0.00541602	289.891	81.2488	AT3G19000		2-oxoglutarate (2OG) and Fe(II)-dependent oxygenase superfamily protein
Wa8730a007g003340	538.885	-1.82952	4.78349e-08	1.56548e-06	841.23	236.54	AT5G63490;AT5G50530	,	CBS / octicosapeptide/Phox/Bemp1 (PB1) domains-containing protein;CBS / octicosapeptide/Phox/Bemp1 (PB1) domains-containing protein
Wa8730a014g001620	2859.54	-1.82679	8.10769e-13	3.66572e-11	4460.9	1258.18
Wa8730a007g008500	865.451	-1.82405	9.19014e-10	3.37012e-08	1350.01	380.892	AT3G44450
Wa8730a015g003140	277.385	-1.80949	2.83016e-05	0.000718347	431.491	123.278	AT3G57680		Peptidase S41 family protein
Wa8730a014g001000	190.149	-1.80133	0.000477758	0.0102255	295.304	84.9927	AT2G03350		Protein of unknown function, DUF538
Wa8730a001g004920	447.443	-1.79668	1.53947e-06	4.48997e-05	694.579	200.307	AT1G12950;AT5G38030;AT3G03620;AT5G17700;AT1G47530;AT1G23300	RSH2,	root hair specific 2;MATE efflux family protein;MATE efflux family protein;MATE efflux family protein;MATE efflux family protein;MATE efflux family protein
Wa8730a014g003880	186.014	-1.7941	0.000567147	0.0120018	288.571	83.4562	AT2G44870
Wa8730a010g003960	2184.61	-1.7913	7.10433e-13	3.23808e-11	3389.57	979.643
Wa8730a001g004870	255.969	-1.79078	0.000151404	0.00349284	397.48	114.458
Wa8730a002g003930	440.984	-1.78333	3.75146e-06	0.000105849	683.683	198.284	AT4G25220;AT4G17550;AT3G47420	AtG3Pp2, G3Pp2, RHS15, AtG3Pp4, G3Pp4, ATPS3, AtG3Pp1, G3Pp1, PS3	Encodes a member of the phosphate starvation-induced glycerol-3-phosphate permease gene family: AT3G47420(G3Pp1), AT4G25220(G3Pp2), AT1G30560(G3Pp3), AT4G17550(G3Pp4) and AT2G13100(G3Pp5).;Encodes a member of the phosphate starvation-induced glycerol-3-phosphate permease gene family: AT3G47420(G3Pp1), AT4G25220(G3Pp2), AT1G30560(G3Pp3), AT4G17550(G3Pp4) and AT2G13100(G3Pp5).;Encodes a Pi starvati…
Wa8730a001g006300	499.222	-1.78308	5.69034e-07	1.71288e-05	773.466	224.978	AT5G01700		Protein phosphatase 2C family protein
Wa8730a004g004930	342.075	-1.78173	1.42123e-05	0.000371234	529.918	154.232	AT2G20835
Wa8730a014g005440	1208.59	-1.77898	2.96499e-09	1.05299e-07	1872.22	544.965
Wa8730a018g003200	299.835	-1.77799	3.76076e-05	0.000936695	464.294	135.376	AT1G02850;AT2G44480;AT1G60090;AT3G62750	BGLU11, BGLU17, BGLU4, BGLU8	beta glucosidase 11;beta glucosidase 17;beta glucosidase 4;beta glucosidase 8
Wa8730a005g004860	360.838	-1.76686	1.19466e-05	0.000314976	557.856	163.82	AT5G42830		HXXXD-type acyl-transferase family protein
Wa8730a010g002340	248.981	-1.76567	0.000233102	0.00525905	384.544	113.418	AT3G61770		Acid phosphatase/vanadium-dependent haloperoxidase-related protein
Wa8730a005g008960	235.543	-1.76381	0.000245008	0.00547281	363.863	107.223
Wa8730a001g008120	973.677	-1.74737	2.54463e-08	8.52603e-07	1500.84	446.513
Wa8730a005g000120	701.941	-1.74697	1.09034e-07	3.45775e-06	1081.64	322.243	AT2G26670	ATHO1, GUN2, HO1, HY1, HY6, TED4	Encodes a plastid heme oxygenase necessary for phytochrome chromophore biosynthesis and for coupling the expression of some nuclear genes to the functional state of the chloroplast.
Wa8730a002g002160	297.606	-1.74414	6.443e-05	0.00155655	458.369	136.844	AT5G52030		TraB family protein
Wa8730a001g006900	2027.96	-1.7416	1.1231e-10	4.42092e-09	3122.68	933.238	AT2G29980;AT3G11170;AT5G05580	AtFAD3, FAD3, AtFAD7, FAD7, FADD, AtFAD8, FAD8	Endoplasmic reticulum enzyme responsible for the synthesis of 18:3 fatty acids from phospholipids. Uses cytochrome b5 as electron donor.;Chloroplastic enzyme responsible for the synthesis of 16:3 and 18:3 fatty acids from galactolipids, sulpholipids and phosphatidylglycerol. Uses ferredoxin as electron donor. Gene expression is induced by wounding in shoot and root. The wound-response in shoot is…
Wa8730a020g001900	327.965	-1.72839	6.18077e-05	0.00149641	503.731	152.199	AT3G59400	GUN4	GUN, genomes uncoupled, is necessary for coupling the expression of some nuclear genes to the functional state of the chloroplast. Binds to the magnesium chelatase complex and promotes formation of the substrate,a tetrapyrrole signaling molecule. Porphyrin-binding protein that enhances the activity of Mg-chelatase. Although required for chlorophyll accumulation under normal growth conditions, GUN…
Wa8730a004g005980	2435.57	-1.72646	4.0715e-11	1.6668e-09	3740.32	1130.82	AT1G78510;AT1G17050;AT2G34630	AtSPS1, SPS1, AtSPS2, SPS2, GPPS, GPS1	Encodes a protein with solanesyl diphosphate synthase activity.;Encodes a protein with solanesyl diphosphate synthase activity.;Encodes a geranyl diphosphate synthase. RNAi lines are dwarf. T-DNA knock-out lines are embryo lethal.
Wa8730a007g007100	197.336	-1.72426	0.00205721	0.0400002	303.271	91.4013	AT1G22640;AT4G34990;AT4G38620;AT2G16720;AT1G35515	ATMYB3, MYB3, AtMYB32, MYB32, ATMYB4, MYB4, ATMYB7, ATY49, MYB7, HOS10, MYB8	MYB-type transcription factor (MYB3) that represses phenylpropanoid biosynthesis gene expression;Member of the R2R3 factor gene family.;Encodes a R2R3 MYB protein which is involved in the response to UV-B. It functions as a repressor of target gene expression. One of its target genes encodes cinnamate 4-hydroxylase; mutants accumulate sinapate esters in their leaves. MYB4 binds to its own promote…
Wa8730a002g000050	600.116	-1.7217	9.40015e-07	2.79227e-05	920.961	279.27
Wa8730a003g005060	1685.12	-1.71089	4.37149e-10	1.67395e-08	2581.53	788.711	AT1G68530;AT1G25450;AT2G26640;AT4G34510;AT5G43760;AT1G19440	CER6, CUT1, G2, KCS6, POP1, CER60, KCS5, KCS11, KCS17, KCS20, KCS4	Encodes KCS6, a member of the 3-ketoacyl-CoA synthase family involved in the biosynthesis of VLCFA (very long chain fatty acids).;Encodes KCS5, a member of the 3-ketoacyl-CoA synthase family involved in the biosynthesis of VLCFA (very long chain fatty acids).;Encodes KCS11, a member of the 3-ketoacyl-CoA synthase family involved in the biosynthesis of VLCFA (very long chain fatty acids).;Encodes …
Wa8730a014g006200	11226.3	-1.69973	1.75547e-13	8.40984e-12	17167.4	5285.21	AT1G20630;AT4G35090	CAT1, CAT2	Catalyzes the reduction of hydrogen peroxide using heme group as cofactor. Protects cells from toxicity by H2O2.;Encodes a peroxisomal catalase, highly expressed in bolts and leaves. mRNA expression patterns show circadian regulation with mRNA levels being high in the subjective early morning. Loss of function mutations have increased H2O2 levels and increased H2O2 sensitivity. Mutants accumulate…
Wa8730a007g002730	1241.71	-1.69831	8.77836e-09	3.02223e-07	1898.41	585.02
Wa8730a009g004340	467.667	-1.68868	2.98575e-05	0.000753669	713.644	221.691
Wa8730a008g001340	10507.2	-1.68051	3.72714e-08	1.2305e-06	16018.4	4996.09
Wa8730a005g007240	12020.2	-1.67982	6.29236e-10	2.33793e-08	18321.1	5719.26	AT1G67090;AT5G38430	RBCS1A, RBCS1B	Encodes a member of the Rubisco small subunit (RBCS) multigene family: RBCS1A (At1g67090), RBCS1B (At5g38430), RBCS2B (At5g38420), and RBCS3B (At5g38410). Functions to yield sufficient Rubisco content for leaf photosynthetic capacity.;Encodes a member of the Rubisco small subunit (RBCS) multigene family: RBCS1A (At1g67090), RBCS1B (At5g38430), RBCS2B (At5g38420), and RBCS3B (At5g38410).
Wa8730a018g003590	407.237	-1.67341	6.5009e-05	0.00156718	619.885	194.589
Wa8730a001g001650	820.735	-1.66931	7.29658e-06	0.000198898	1248.35	393.125	AT3G48100;AT2G41310;AT3G57040	ARR5, ATRR2, IBC6, RR5, ARR8, ATRR3, RR3, ARR9, ATRR4	Encodes a transcription repressor that mediates a negative feedback loop in cytokinin signalling. ARR5 expression is upregulated by Class I KNOX genes. Arr5 protein is stabilized by cytokinin in a two-component phosphorelay.;Encodes an A- type response Regulator that is primarily expressed in the root and is involved in cytokinin-mediated signalling.;response regulator ARR9, A two-component respo…
Wa8730a015g005290	223.129	-1.65565	0.00201605	0.0392676	338.811	107.447	AT3G01490		Protein kinase superfamily protein
Wa8730a020g002090	3441.73	-1.65449	1.84712e-09	6.66503e-08	5223.66	1659.81	AT1G59730	ATH7, TH7	thioredoxin H-type 7
Wa8730a015g004980	1824.44	-1.65303	9.58851e-09	3.29108e-07	2768.85	880.035	AT4G34135;AT2G15490;AT1G24100;AT2G23250	UGT73B2, UGT73B4, UGT74B1, UGT84B2	The At4g34135 gene encodes a flavonol 7-O-glucosyltransferase (EC 2.4.1.237) that glucosylates also with a 20 fold lower activity flavonols (kaempferol and quercetin) at the 3-O-position.;UDP-glycosyltransferase 73B4;Encodes a UDP-glucose:thiohydroximate S-glucosyltransferase, involved in glucosinolate biosynthesis;UDP-glucosyl transferase 84B2
Wa8730a018g002510	417.577	-1.65191	9.06673e-05	0.0021444	633.37	201.785	AT4G02440	EID1	EID1 is an F-box protein that functions as a negative regulator in phytochrome A (phyA)-specific light signalling. Expressed at all stages of plant development independently of light conditions, localizes to the nucleus, and forms nuclear speckles under continuous far-red light. Forms stable dimeric and trimeric complexes with several ASK proteins and Cullin1 in yeast and in planta.
Wa8730a004g001550	521.383	-1.64816	3.05318e-05	0.000768964	790.705	252.061	AT1G64500;AT2G41330;AT4G10630;AT3G57070	,	A member of a protein family found in plants and animals that contain conserved C-terminal glutaredoxin-like and putative zinc-binding cysteine-rich domains. It is involved in light stimulated actin bundling and chloroplast movement. The mRNA is cell-to-cell mobile.;Glutaredoxin family protein;Glutaredoxin family protein;Glutaredoxin family protein
Wa8730a009g005910	14443.5	-1.64474	2.81286e-07	8.62865e-06	21886.6	7000.39	AT5G54270	LHCB3, LHCB3*1	Lhcb3 protein is a component of the main light harvesting chlorophyll a/b-protein complex of Photosystem II (LHC II).
Wa8730a008g001000	13641.5	-1.64407	1.50442e-08	5.0861e-07	20670.5	6612.51
Wa8730a003g004270	2412.19	-1.64246	2.04426e-09	7.35282e-08	3654.01	1170.36	AT4G02930		GTP binding Elongation factor Tu family protein
Wa8730a009g001980	1195.18	-1.6412	1.40012e-07	4.3907e-06	1810.19	580.168	AT1G03340
Wa8730a013g000450	543.696	-1.63782	2.52793e-05	0.000648278	822.922	264.469	AT5G42020	BIP, BIP2	Luminal binding protein (BiP2) involved in polar nuclei fusion during proliferation of endosperm nuclei.
Wa8730a007g000060	328.545	-1.62987	0.000697925	0.0145504	496.381	160.708
Wa8730a007g007400	350.418	-1.6271	0.000438759	0.00940867	529.296	171.541	AT3G52450;AT2G35930;AT3G11840;AT1G49780	AtPUB22, PUB22, AtPUB23, PUB23, PUB24, PUB26	Encodes a cytoplasmically localized U-box domain E3 ubiquitin ligase protein that is involved in the response to water stress and acts as a negative regulator of PAMP-triggered immunity.;Encodes a cytoplasmically localized U-box domain containing E3 ubiquitin ligase that is involved in the response to water stress and acts as a negative regulator of PAMP-triggered immunity.;Encodes a U-box-domain…
Wa8730a009g003340	1089.79	-1.62308	7.12508e-07	2.13336e-05	1645.64	533.937	AT3G54180;AT2G38620;AT1G09600	CDC2B, CDKB1, 1, CDKB1, 2,	Arabidopsis homolog of yeast cdc2, a protein kinase (cyclin-dependent kinase) that plays a central role in control of the mitotic cell cycle.;Encodes a member of a plant specific family of cyclin dependent kinases.;Protein kinase superfamily protein
Wa8730a018g000370	5050.69	-1.61694	1.83406e-09	6.63918e-08	7617.62	2483.76	AT5G02120	OHP, PDE335	Encodes a one helix protein homologous to cyanobacterial high-light inducible proteins. The protein is localized to the thylakoid membrane and its transcript is transiently induced by exposure to high light conditions.
Wa8730a011g000310	700.348	-1.61629	9.70875e-06	0.000259623	1056.17	344.522	AT2G35740;AT3G03090;AT5G17010	ATINT3, INT3, AtVGT1, VGT1,	nositol transporter 3;Encodes a vacuolar membrane-localized glucose transporter that can also transport fructose. Mutations in these gene have effects on seed germination and time to flowering.;Major facilitator superfamily protein
Wa8730a001g001940	8371.52	-1.60894	3.8615e-09	1.36278e-07	12608.7	4134.35	AT2G13360	AGT, AGT1, SGAT	Encodes a peroxisomal photorespiratory enzyme that catalyzes transamination reactions with multiple substrates. It is involved in photorespiration.
Wa8730a015g004780	323.479	-1.60203	0.00107858	0.0217611	486.639	160.319	AT4G37270	ATHMA1, HMA1	Encodes a P1B-type ATPases that is localized to the chloroplast envelope and is involved in the transport of Cu into chloroplasts. It is essential for growth under high light conditions.
Wa8730a006g006340	407.183	-1.59411	0.000410681	0.00885717	611.968	202.398
Wa8730a004g003590	25356.1	-1.5928	5.01178e-09	1.74683e-07	38085.2	12626.9	AT3G14420;AT4G18360	GOX1, GOX3	Encodes a glycolate oxidase that modulates reactive oxygen species-mediated signal transduction during nonhost resistance. The mRNA is cell-to-cell mobile.;Encodes a glycolate oxidase that modulates reactive oxygen species-mediated signal transduction during nonhost resistance.
Wa8730a009g001610	33226	-1.59123	7.16116e-11	2.88962e-09	49893.1	16558.9	AT5G59320	LTP3	Predicted to encode a PR (pathogenesis-related) protein. Belongs to the lipid transfer protein (PR-14) family with the following members: At2g38540/LTP1, At2g38530/LTP2, At5g59320/LTP3, At5g59310/LTP4, At3g51600/LTP5, At3g08770/LTP6, At2g15050/LTP7, At2g18370/LTP8, At2g15325/LTP9, At5g01870/LTP10, At4g33355/LTP11, At3g51590/LTP12, At5g44265/LTP13, At5g62065/LTP14, At4g08530/LTP15.
Wa8730a018g003020	376.85	-1.58884	0.000564075	0.0119592	565.588	188.112	AT5G18660	PCB2	Encodes a protein with 3,8-divinyl protochlorophyllide a 8-vinyl reductase activity. Mutants accumulate divinyl chlorophyll rather than monovinyl chlorophyll.
Wa8730a008g000240	4204.47	-1.58779	1.44787e-08	4.90966e-07	6309.38	2099.56
Wa8730a004g008550	984.654	-1.58351	3.86914e-06	0.000108355	1476.62	492.686	AT3G16340;AT2G26910;AT1G15520	ABCG29, ATPDR1, AtABCG29, PDR1, ABCG32, ATPDR4, AtABCG32, PDR4, PEC1, ABCG40, ATABCG40, ATPDR12, PDR12	Encodes a p-coumaryl alcohol exporter involved in lignin biosynthesis.;Encodes a member of the PLEIOTROPIC DRUG RESISTANCE family of ATP binding cassette transporters. Required for the formation of a functional cuticle.;ABC transporter family involved in ABA transport and resistance to lead. Localizes to plasma membrane. Upregulated by lead. Expressed in leaves, flowers, stomata and roots.
Wa8730a007g000330	846.777	-1.57503	1.44636e-05	0.000376925	1268.11	425.44
Wa8730a005g003150	377.438	-1.55629	0.00114715	0.0230619	563.399	191.477	AT4G35950;AT4G28950	ARAC6, ATRAC6, ATROP5, RAC2, RAC6, ROP5, ARAC7, ATRAC7, ATROP9, RAC7, ROP9	A member of ROP GTPases gene family-like. GTP binding protein Arac6.;A member of ROP GTPase gene family.
Wa8730a002g010670	829.815	-1.54809	6.91325e-05	0.00165948	1236.38	423.252	AT5G60600	CLB4, CSB3, GCPE, HDS, ISPG	Encodes a chloroplast-localized hydroxy-2-methyl-2-(E)-butenyl 4-diphosphate (HMBPP) synthase (HDS), catalyzes the formation of HMBPP from 2-C-methyl-D-erythrytol 2,4-cyclodiphosphate (MEcPP). The HDS enzyme controls the penultimate steps of the biosynthesis of IPP and dimethylallyl diphosphate (DMAPP) via the MEP pathway and may serve as a metabolic control point for SA-mediated disease resistan…
Wa8730a004g006700	1074.83	-1.54431	7.54475e-05	0.00180337	1600.24	549.418
Wa8730a001g008840	398.66	-1.54223	0.00249791	0.0474223	593.125	204.196
Wa8730a008g001400	1287.92	-1.54133	7.19671e-06	0.000196652	1917	658.839
Wa8730a001g007340	6481.29	-1.54117	4.81066e-06	0.000133395	9647.38	3315.2	AT2G18800;AT2G06850;AT4G30270;AT4G14130;AT4G25810;AT5G57550	ATXTH21, XTH21, EXGT-A1, EXT, XTH4, MERI-5, MERI5B, SEN4, XTH24, XTH15, XTR7, XTH23, XTR6, XTH25, XTR3	xyloglucan endotransglucosylase/hydrolase 21;endoxyloglucan transferase (EXGT-A1) gene;encodes a protein similar to endo xyloglucan transferase in sequence. It is also very similar to BRU1 in soybean, which is involved in brassinosteroid response.;xyloglucan endotransglycosylase-related protein (XTR7);xyloglucan endotransglycosylase-related protein (XTR6);xyloglucan endotransglycosylase-related p…
Wa8730a017g001700	635.275	-1.53695	0.000235336	0.00529883	945.069	325.481	AT5G47390;AT5G61620	MYBH,	Encodes a circadian-regulated transcription factor which specifically controls cell expansion during leaf development by controlling ROS homeostasis. The mRNA is cell-to-cell mobile.;myb-like transcription factor family protein
Wa8730a004g005080	1335.04	-1.52405	0.000153513	0.00353424	1981.88	688.199	AT4G05070		Wound-responsive family protein
Wa8730a006g005470	368.595	-1.52171	0.00250667	0.0475086	546.763	190.426	AT1G73990	SPPA, SPPA1	Encodes a putative protease SppA (SppA).
Wa8730a009g000130	1571.26	-1.51473	9.91591e-05	0.00234032	2327.68	814.831	AT3G54890;AT5G01530;AT3G08940;AT2G40100	LHCA1, LHCB4.1, LHCB4.2, LHCB4.3	Encodes a component of the light harvesting complex associated with photosystem I.;light harvesting complex photosystem II;Lhcb4.2 protein (Lhcb4.2, protein involved in the light harvesting complex of photosystem II;Lhcb4:3 protein (Lhcb4.3, light harvesting complex of photosystem II
Wa8730a007g007620	1107.51	-1.51134	0.000127487	0.00295319	1639.43	575.597
Wa8730a011g005460	3078.23	-1.50908	3.235e-05	0.000812938	4555.21	1601.26	AT2G25080;AT4G31870	ATGPX1, GPX1, ATGPX7, GPX7	Encodes glutathione peroxidase.;Encodes glutathione peroxidase.
Wa8730a003g000120	10047.9	-1.50857	1.79377e-07	5.54789e-06	14869.4	5226.31	AT4G37930	SHM1, SHMT1, STM	Encodes a protein with mitochondrial serine hydroxymethyltransferase activity, which functions in the photorespiratory pathway, catalyzes the conversion of serine and tetrahydrofolate to glycine and 5,10-methylene tetrahydrofolate. Involved in controlling cell damage caused by abiotic stress, such as high light and salt and the hypersensitive defense response of plants.
Wa8730a001g008980	680.562	-1.50773	0.000611352	0.0128407	1006.72	354.402	AT2G42220		Rhodanese/Cell cycle control phosphatase superfamily protein
Wa8730a004g000910	889.54	-1.49815	0.000157798	0.00361076	1313.8	465.282
Wa8730a009g004540	6895	-1.49515	3.79559e-07	1.14868e-05	10178.7	3611.26
Wa8730a018g000050	5070.07	-1.49077	3.8017e-06	0.000106999	7479.41	2660.74
Wa8730a011g004770	607.441	-1.48639	0.000930789	0.018949	895.119	319.763	AT2G04039		NdhV is loosely associated with the NDH complex and is required for stabilizing NDH subcomplexes A and E.
Wa8730a002g004910	788.595	-1.47909	0.000393074	0.00851006	1160.78	416.406	AT2G28305;AT4G35190;AT5G03270;AT5G06300	ATLOG1, LOG1, LOG5, LOG6, LOG7	Putative lysine decarboxylase family protein;Putative lysine decarboxylase family protein;lysine decarboxylase family protein;Putative lysine decarboxylase family protein
Wa8730a012g000440	36137.8	-1.47873	3.319e-05	0.000832189	53189.9	19085.7
Wa8730a018g000650	1125.02	-1.46638	0.000203169	0.00460216	1652.32	597.721	AT3G53620	AtPPa4, PPa4	Encodes a soluble protein with inorganic pyrophosphatase activity that is highly specific for Mg-inorganic pyrophosphate.
Wa8730a009g000400	599.107	-1.46195	0.00182019	0.0357622	878.879	319.335	AT1G07420;AT2G29390	ATSMO1, SMO2-1, ATSMO2, ATSMO2-2, SMO2-2	Arabidopsis thaliana sterol 4-alpha-methyl-oxidase mRNA;Encodes a sterol 4-alpha-methyl-oxidase, specifically a 4-alpha-methyl-delta-7-sterol-4alpha-methyl-oxidase.
Wa8730a015g005520	3698.75	-1.45547	1.21845e-05	0.000320497	5420.81	1976.68
Wa8730a009g003140	903.652	-1.44854	0.00172706	0.0340511	1322.7	484.604
Wa8730a008g001540	2387.01	-1.44632	3.94015e-05	0.000974906	3492.25	1281.78	AT5G08050		Encodes a grana core localized protein. Mutant plants have reduced NPQ, affected organization of light-havesting complex II and an enhanced grana stacking.
Wa8730a007g004410	3385.28	-1.44598	1.39873e-05	0.000366208	4952.62	1817.94	AT4G10240;AT1G06040;AT2G31380	bbx23, BBX24, STO, BBX25, STH	B-box zinc finger family protein;Encodes salt tolerance protein (STO) which confers salt tolerance to yeast cells. Fully complements calcineurin deficient yeast but does not encode a phosphoprotein phosphatase. Sequence has similarities to CONSTANS. STO co-localizes with COP1 and plays a role in light signaling.;a B-box zinc finger protein that interacts with COP1. contains a novel 11 amino acid …
Wa8730a001g001120	7171.13	-1.44101	1.02918e-05	0.000273914	10481.6	3860.67
Wa8730a013g005950	1854.34	-1.4387	0.000160963	0.0036757	2709.7	998.986	AT3G53420;AT1G01620;AT4G00430;AT2G37170;AT3G54820	AtPIP2, 1, PIP2, PIP2, 1, PIP2A, PIP1, 3, PIP1C, TMP-B, PIP1, 4, PIP1E, TMP-C, PIP2, 2, PIP2B, PIP2, 5, PIP2D	a member of the plasma membrane intrinsic protein subfamily PIP2. localizes to the plasma membrane and exhibits water transport activity in Xenopus oocyte. expressed specifically in the vascular bundles and protein level increases slightly during leaf dev. When expressed in yeast cells can conduct hydrogen peroxide into those cells.;a member of the plasma membrane intrinsic protein subfamily PIP1…
Wa8730a019g001770	3631.42	-1.43022	4.92866e-05	0.00120624	5296.99	1965.85
Wa8730a015g005880	1192.92	-1.41361	0.000967394	0.0196209	1735.07	650.778	AT2G24150	HHP3	heptahelical transmembrane protein HHP3
Wa8730a019g002640	1361.26	-1.4128	0.000510638	0.0108672	1979.35	743.161	AT5G19140	AILP1, ATAILP1	Aluminium induced protein with YGL and LRDR motifs
Wa8730a009g006050	933.311	-1.40185	0.00162919	0.0322344	1354.17	512.456	AT5G42960
Wa8730a017g002730	5005.11	-1.39795	5.81573e-05	0.00141283	7256.83	2753.4	AT1G75600;AT1G13370	,	Histone superfamily protein;Histone superfamily protein
Wa8730a018g001290	1215.58	-1.39392	0.00225265	0.043277	1760.54	670.616	AT2G40340;AT2G38340;AT5G05410;AT3G11020;AT5G18450	AtERF48, DREB2C, DREB19, DREB2, DREB2A, DREB2, DREB2B,	Encodes a member of the DREB subfamily A-2 of ERF/AP2 transcription factor family. The protein contains one AP2 domain. There are eight members in this subfamily including DREB2A AND DREB2B that are involved in response to drought.;encodes a member of the DREB subfamily A-2 of ERF/AP2 transcription factor family. The protein contains one AP2 domain. There are eight members in this subfamily inclu…
Wa8730a001g007580	1447.54	-1.38824	0.00127837	0.0255175	2095.15	799.934	AT3G02380;AT2G24790;AT5G24930;AT5G57660	ATCOL2, BBX3, COL2, ATCOL3, BBX4, COL3, ATCOL4, BBX5, COL4, ATCOL5, BBX6, COL5	homologous to the flowering-time gene CONSTANS (CO) encoding zinc-finger proteins;Positive regulator of photomorphogenesis that acts downstream of COP1 but can promote lateral root development independently of COP1 and also function as a daylength-sensitive regulator of shoot branching.;CONSTANS-like 4;CONSTANS-like 5
Wa8730a005g008430	5751.89	-1.3878	0.000592144	0.0124605	8322.8	3180.98	AT1G67090;AT5G38430	RBCS1A, RBCS1B	Encodes a member of the Rubisco small subunit (RBCS) multigene family: RBCS1A (At1g67090), RBCS1B (At5g38430), RBCS2B (At5g38420), and RBCS3B (At5g38410). Functions to yield sufficient Rubisco content for leaf photosynthetic capacity.;Encodes a member of the Rubisco small subunit (RBCS) multigene family: RBCS1A (At1g67090), RBCS1B (At5g38430), RBCS2B (At5g38420), and RBCS3B (At5g38410).
Wa8730a017g001210	2736.38	-1.38492	0.000382716	0.00833389	3957.1	1515.66
Wa8730a006g005330	30671.3	-1.38367	0.000182565	0.00416056	44346.6	16996	AT1G12900;AT1G42970;AT3G04120	GAPA-2, GAPB, GAPC, GAPC-1, GAPC1	glyceraldehyde 3-phosphate dehydrogenase A subunit 2;Encodes chloroplast localized glyceraldehyde-3-phosphate dehydrogenase that can use both NADH and NADPH to reduce 1,3-diphosphate glycerate. It forms A2B2 heterotetramers with GapA forms of the GADPH enzyme. These complexes are active in the light under reducing conditions, but show reduced NADPH-dependent activity in response to oxidized thior…
Wa8730a018g002220	1893.18	-1.37426	0.0011692	0.0234632	2732.67	1053.7	AT2G47485
Wa8730a007g003890	2969.47	-1.36991	0.000412666	0.00888296	4282.16	1656.77	AT5G51010		Rubredoxin-like superfamily protein
Wa8730a004g004850	1916.9	-1.36431	0.00215311	0.0415776	2761.13	1072.67	AT3G21690;AT1G61890;AT4G21910;AT1G11670	,	MATE efflux family protein;MATE efflux family protein;MATE efflux family protein;MATE efflux family protein
Wa8730a007g005460	5287.82	-1.36368	0.000185566	0.00422042	7616.16	2959.49
Wa8730a009g000600	4713.55	-1.35737	0.000310121	0.00684576	6780.44	2646.66	AT5G02500;AT3G09440	AT-HSC70-1, AtHsp70-1, HSC70, HSC70-1, HSP70-1,	encodes a member of heat shock protein 70 family.;Heat shock protein 70 (Hsp 70) family protein
Wa8730a008g003140	1939.89	-1.35471	0.00261286	0.049438	2788.77	1091.01	AT1G56200;AT1G30475	EMB1303,	Encodes a chloroplast localized protein that is essential for chloroplast development.;
Wa8730a007g001270	20156.4	-1.32236	0.000850905	0.0174808	28797.5	11515.3	AT1G10960	ATFD1, FD1	ferredoxin 1
Wa8730a009g000250	1976.33	1.34125	0.00237476	0.0454677	1118.54	2834.12
Wa8730a014g001330	2598.4	1.39965	0.000781659	0.0162061	1428.02	3768.79	AT2G03680;AT1G26355;AT1G69230;AT3G02180;AT5G15600	SKU6, SPR1, SP1L1, SP1L2, SP1L3, SP1L4	The SPR1 gene encodes a plant-specific 12-kD protein which has a repeated motif at both ends, separated by a predicted rod-like domain, suggesting that it may act as an intermolecular linker. Ubiquitously expressed and belongs to a six-member gene family in Arabidopsis; expressed in transgenic seedlings localized to microtubules within the cortical array, preprophase band, phragmoplast, and mitot…
Wa8730a005g000500	1494.52	1.41376	0.000582219	0.0122976	815.919	2173.13	AT1G52720;AT3G15630	,	;
Wa8730a005g000010	3247.58	1.45065	2.43775e-05	0.000629455	1739.57	4755.59	AT3G15840	PIFI	Encodes a chloroplast-targeted protein localized in the stroma that is a novel component essential for NDH-mediated non-photochemical reduction of the plastoquinone pool in chlororespiratory electron transport.
Wa8730a008g001830	3195.78	1.48874	6.53093e-06	0.000178893	1678.89	4712.67
Wa8730a002g004740	1248.76	1.49194	0.000104305	0.0024515	655.247	1842.28	AT4G34870;AT2G16600;AT4G38740;AT2G38730;AT2G21130	ATCYP1, ROC5, AtCYP19-1, CYP19, ROC3, ROC1	belongs to cyclophilin family;Encodes cytosolic cyclophilin ROC3.;Encodes cytosolic cyclophilin ROC1.;Cyclophilin-like peptidyl-prolyl cis-trans isomerase family protein;Cyclophilin-like peptidyl-prolyl cis-trans isomerase family protein
Wa8730a010g001790	890.058	1.52261	0.000107656	0.00252498	459.472	1320.64	AT1G65930;AT5G14590	cICDH,	Encodes a NADP+-isocitrate dehydrogenase that is believed to function in the cytosol. It appears to contribute to NADPH production under oxidative stress, and thereby to participate in redox signalling linked to defense responses.;Isocitrate/isopropylmalate dehydrogenase family protein
Wa8730a002g005830	472.107	1.52557	0.00123039	0.0246034	243.344	700.869	AT1G76520;AT5G65980;AT2G17500;AT1G20925	,	Auxin efflux carrier family protein;Auxin efflux carrier family protein;Auxin efflux carrier family protein;Auxin efflux carrier family protein
Wa8730a006g005950	1597.49	1.55663	2.17785e-06	6.28672e-05	810.437	2384.54
Wa8730a003g001430	29129.1	1.63721	7.27342e-11	2.91876e-09	14172.5	44085.8	AT2G21660;AT1G17640	ATGRP7, CCR2, GR-RBP7, GRP7,	Encodes a small glycine-rich RNA binding protein that is part of a negative-feedback loop through which AtGRP7 regulates the circadian oscillations of its own transcript. Gene expression is induced by cold. GRP7 appears to promote stomatal opening and reduce tolerance under salt and dehydration stress conditions, but, promotes stomatal closing and thereby increases stress tolerance under conditio…
Wa8730a005g006880	795.822	1.64568	8.21687e-06	0.000221836	385.438	1206.21	AT1G69830;AT1G10760	AMY3, ATAMY3, GWD, GWD1, SEX1, SOP, SOP1	Encodes a plastid-localized &#945;-amylase. Expression is reduced in the SEX4 mutant. Loss of function mutations show normal diurnal pattern of starch accumulation/degradation. Expression follows circadian rhythms.;Encodes an &#945;-glucan, water dikinase required for starch degradation. Involved in cold-induced freezing tolerance. Mutations that eliminate the GWD protein or affect the dikinase d…
Wa8730a008g005250	545.9	1.65616	2.75296e-05	0.000701195	263.014	828.786	AT5G54800;AT1G61800	ATGPT1, GPT1, ATGPT2, GPT2	Encodes glucose6-Phosphate/phosphate transporter 1. Essential for pollen maturation and embryo sac development.;glucose6-Phosphate/phosphate transporter 2
Wa8730a003g005640	856.389	1.6804	1.66198e-06	4.83477e-05	407.08	1305.7	AT3G46860		Predicted to encode a PR (pathogenesis-related) peptide that belongs to the PR-6 proteinase inhibitor family. Six putative PR-6-type protein encoding genes are found in Arabidopsis: At2g38900, At2g38870, At5g43570, At5g43580, At3g50020 and At3g46860.
Wa8730a001g007400	293.736	1.72419	0.00020986	0.00474418	136.446	451.025	AT5G57170;AT5G01650	,	Tautomerase/MIF superfamily protein;Tautomerase/MIF superfamily protein
Wa8730a003g006540	226.665	1.73387	0.000845294	0.0173973	104.734	348.597	AT5G64860	DPE1	Encodes a maltotriose-metabolizing enzyme with chloroplastic &#945;-1,4-glucanotransferase activity. Mutant has altered starch degradation.
Wa8730a001g012160	570.914	1.74384	1.94932e-06	5.64151e-05	262.551	879.276	AT2G39890;AT3G55740;AT2G36590	ATPROT1, PROT1, ATPROT2, PROT2, ATPROT3, ProT3	Encodes a proline transporter with affinity for gly betaine, proline and GABA. Protein is expressed in the vascular tissue, specifically the phloem.;Encodes a proline transporter with affinity for gly betaine, proline, and GABA. Protein is expressed most highly in the roots.;Encodes a proline transporter with affinity for gly betaine, proline, and GABA. Protein is expressed in leaves, flowers and…
Wa8730a017g004610	294.963	1.78088	0.000262531	0.00585262	132.746	457.181	AT3G17880	ATHIP2, ATTDX, HIP, TDX	Encodes a thioredoxin-like disulfide reductase. The protein interacts with the yeast Hsp70 protein Ssb2 in vitro. This interaction is sensitive to the redox status of the thioredoxin domain of AtTDX.
Wa8730a007g001770	280.946	1.78721	7.8495e-05	0.00187224	126.26	435.632	AT1G78070		Transducin/WD40 repeat-like superfamily protein
Wa8730a005g001960	242.37	1.79901	0.000325326	0.00716735	108.342	376.399	AT1G71120;AT5G03810;AT3G16370;AT4G28780;AT3G53100	GLIP6	Contains lipase signature motif and GDSL domain.;GDSL-motif esterase/acyltransferase/lipase. Enzyme group with broad substrate specificity that may catalyze acyltransfer or hydrolase reactions with lipid and non-lipid substrates.;GDSL-motif esterase/acyltransferase/lipase. Enzyme group with broad substrate specificity that may catalyze acyltransfer or hydrolase reactions with lipid and non-lipid …
Wa8730a015g004880	183.344	1.80122	0.000971258	0.0196309	81.6614	285.027	AT1G59359;AT1G15830	,	Ribosomal protein S5 family protein;
Wa8730a001g006240	2275.17	1.80575	1.0905e-12	4.87179e-11	1011.99	3538.34
Wa8730a006g003930	218.141	1.81249	0.000263362	0.00585954	96.6817	339.601
Wa8730a001g012590	1346.11	1.81604	2.27969e-11	9.54081e-10	595.382	2096.83
Wa8730a008g000210	211.828	1.81982	0.000339813	0.00745733	93.5063	330.149
Wa8730a009g005720	262.638	1.83294	5.82298e-05	0.00141283	115.075	410.202	AT5G04590	SIR	A.thaliana gene encoding sulfite reductase.
Wa8730a013g004860	2604.26	1.85412	2.18022e-14	1.08606e-12	1128.29	4080.23
Wa8730a014g004470	178.919	1.85678	0.00070472	0.014665	77.3824	280.456
Wa8730a009g001000	455.131	1.88139	1.6384e-07	5.08131e-06	194.251	716.01	AT5G60100;AT5G02810	APRR3, PRR3, APRR7, PRR7	Encodes pseudo-response regulator 3 (APRR3/PRR3). PRR3 transcript levels vary in a circadian pattern with peak expression at dusk under long and short day conditions. PRR3 affects the period of the circadian clock and seedlings with reduced levels of PRR3 have shorter periods, based on transcriptional assays of clock-regulated genes. PRR3 is expressed in the vasculature of cotyledons and leaves w…
Wa8730a001g002350	134.831	1.88805	0.00130194	0.0258962	57.4233	212.239	AT3G56640	SEC15A	Encodes a member of the exocyst complex gene family. The exocyst is a protein complex involved in tethering vesicles to the plasma membrane during regulated or polarized secretion.
Wa8730a008g000940	175.215	1.90103	0.000239412	0.00537984	73.9602	276.469	AT5G13050	5-FCL	5-Formyltetrahydrofolate cycloligase (5-CHO-THF cycloligase - AT5G13050.1) regulates/influences under photorespiratory conditions the activity of another gene product, i.e. serine hydroxymethyltransferase (SHMT) due to accumulating amounts of 5-Formyltetrahydrofolate
Wa8730a011g004270	151.477	1.91218	0.00065081	0.0135934	63.4966	239.458
Wa8730a004g004060	236.391	1.91273	3.85469e-05	0.000955862	99.1357	373.647	AT4G30220	RUXF	small nuclear ribonucleoprotein F
Wa8730a002g008040	638.572	1.93221	5.6602e-10	2.14554e-08	265.098	1012.05	AT2G37540		NAD(P)-binding Rossmann-fold superfamily protein
Wa8730a010g001560	109.067	1.93811	0.00216874	0.0418077	45.1346	173	AT4G32720	AtLa1, La1	Encodes AtLa1, a member of the highly abundant phosphoprotein La proteins. Predominantly localized to the nucleoplasm and was also detected in the nucleolar cavity. Has RNA binding activity. Required for normal ribosome biogenesis and embryogenesis.
Wa8730a020g000660	247.624	1.96074	7.71793e-06	0.000209876	101.238	394.01	AT3G18680		Amino acid kinase family protein
Wa8730a001g012410	1113.32	1.98031	4.48339e-14	2.20411e-12	450.316	1776.32	AT2G29630	PY, THIC	Encodes a protein involved in thiamin biosynthesis. The protein is an iron-sulfur cluster protein predicted to catalyze the conversion of 5-aminoimidazole ribonucleotide (AIR) to hydroxymethylpyrimidine (HMP) or hydroxymethylpyrimidine phosphate (HMP-P). A severe reduction of THIC levels in plants decreases vitamin B1 (thiamin diphosphate (TPP)) levels and also leads to changes in the levels of n…
Wa8730a005g003770	134.765	1.9965	0.000624391	0.0130901	53.8778	215.652
Wa8730a007g007060	312.796	2.0492	8.55228e-08	2.71982e-06	121.703	503.888	AT1G35420		alpha/beta-Hydrolases superfamily protein
Wa8730a008g000400	372.135	2.05664	1.1282e-08	3.84888e-07	144.147	600.122
Wa8730a011g002200	202.831	2.05875	5.51937e-06	0.000151924	78.5169	327.144	AT4G17140		pleckstrin homology (PH) domain-containing protein
Wa8730a009g006980	915.961	2.08058	1.48409e-14	7.45886e-13	350.15	1481.77	AT2G15890	MEE14	Encodes CBP1, a regulator of transcription initiation in central cell-mediated pollen tube guidance.
Wa8730a012g003190	101.584	2.09091	0.000583767	0.0123072	38.5987	164.569	AT2G34640	HMR, PTAC12, TAC12	Present in transcriptionally active plastid chromosomes. Involved in plastid gene expression.
Wa8730a003g005370	111.859	2.09341	0.000376165	0.00820711	42.403	181.314	AT4G02640;AT3G54620;AT5G28770	ATBZIP10, BZO2H1, ATBZIP25, BZIP25, BZO2H4, AtbZIP63, BZO2H3	Encodes a basic leucine zipper (bZIP) transcription factor AtbZIP10. AtbZIP10 shuttles between the nucleus and the cytoplasm. It binds consensus G- and C-box DNA sequences. AtbZIP10 acts antagonistically with LSD1 in both pathogen-induced hypersensitive response and basal defense responses.;bZIP transcription factor-like protein mRNA;bZIP protein BZO2H3 mRNA, partial cds
Wa8730a002g010430	7085.07	2.09527	7.92121e-26	6.06646e-24	2687.17	11483	AT5G04280;AT2G37220	AtRZ-1c, RZ-1c,	Encodes one of the zinc finger-containing glycine-rich RNA-binding proteins involved in cold tolerance: AT3G26420 (ATRZ-1A), AT1G60650 (AtRZ-1b), AT5G04280 (AtRZ-1c). It also, along with AtRZ-1b, plays important roles in plant development, pre- mRNA splicing, and general gene expression.;Encodes a chloroplast RNA binding protein. A substrate of the type III effector HopU1 (mono-ADP-ribosyltransfe…
Wa8730a004g000160	210.152	2.09675	4.83559e-06	0.000133757	79.4971	340.807
Wa8730a008g004400	1611.94	2.10266	2.7653e-18	1.68274e-16	608.62	2615.26	AT1G53680	ATGSTU28, GSTU28	Encodes glutathione transferase belonging to the tau class of GSTs. Naming convention according to Wagner et al. (2002).
Wa8730a003g004610	413.323	2.1063	3.50076e-10	1.35288e-08	155.807	670.84
Wa8730a008g000510	1151.7	2.12517	1.81397e-13	8.65325e-12	429.735	1873.67
Wa8730a019g003190	644.879	2.1431	6.81553e-13	3.11907e-11	238.27	1051.49
Wa8730a012g002510	266.816	2.15673	6.30395e-08	2.03936e-06	97.6311	436.001	AT3G01920		DHBP synthase RibB-like alpha/beta domain
Wa8730a015g004430	1101.74	2.17528	3.92589e-19	2.45542e-17	399.398	1804.07	AT1G23820;AT1G70310	SPDS1, SPDS2	Spermidine synthase.;Spermidine synthase.
Wa8730a004g004530	85.0822	2.17651	0.00091293	0.0186191	30.7432	139.421	AT4G20130	PTAC14, TAC14	plastid transcriptionally active 14
Wa8730a016g000370	135.646	2.18238	2.72697e-05	0.000696151	48.9698	222.323	AT1G74560	NRP1	Double nrp1-1 nrp2-1 mutants show arrest of cell cycle progression at G2/M and disordered cellular organization occurred in root tips. Localize in the nucleus and can form homomeric and heteromeric protein complexes with NRP2. Bind histones Histone2A and Histone2B and associate with chromatin in vivo.
Wa8730a007g004840	629.88	2.19978	1.37464e-14	6.93977e-13	225.056	1034.7	AT4G13530
Wa8730a014g007380	442.908	2.22807	3.7791e-12	1.64904e-10	155.714	730.101	AT2G20490	EDA27, NOP10	nucleolar RNA-binding Nop10p family protein
Wa8730a001g003930	122.03	2.24578	3.60573e-05	0.000902073	42.5572	201.503	AT1G56300;AT3G14200;AT1G71000		Chaperone DnaJ-domain superfamily protein;Chaperone DnaJ-domain superfamily protein;Chaperone DnaJ-domain superfamily protein
Wa8730a006g005490	94.0524	2.24888	0.000348677	0.00762214	32.5991	155.506
Wa8730a012g003470	1101.1	2.26724	5.29878e-18	3.13967e-16	379.106	1823.08	AT1G53830;AT3G14310;AT4G33220;AT5G49180;AT5G20860;AT3G43270	ATPME2, PME2, ATPME3, OZS2, PME3, ATPME44, PME44,	encodes a pectin methylesterase;encodes a pectin methylesterase, targeted by a cellulose binding protein (CBP) from the parasitic nematode Heterodera schachtii during parasitism.;pectin methylesterase 44;Encodes a putative pectin methylesterase. The gene is preferentially expressed in floral buds.;Plant invertase/pectin methylesterase inhibitor superfamily;Plant invertase/pectin methylesterase in…
Wa8730a011g001390	321.73	2.27792	1.18397e-10	4.64429e-09	109.951	533.509	AT3G22960;AT1G32440	PKP-ALPHA, PKP1, PKp3	encodes a chloroplast pyruvate kinase alpha subunit. Important for seed oil biosynthesis. Ubiquitously expressed, with significantly increased expression in maturing seeds.;encodes a chloroplast pyruvate kinase beta subunit. The enzyme is less active than the other chloroplast pyruvate kinase beta subunit encoded by AT5G52920. Involved in seed oil biosynthesis. Can partially complement the AT5G52…
Wa8730a017g000600	115.641	2.28596	5.2912e-05	0.00128936	39.3201	191.963
Wa8730a003g004790	77.5828	2.2872	0.000480898	0.0102731	26.4025	128.763
Wa8730a001g008620	244.973	2.29336	4.75555e-09	1.66785e-07	83.0118	406.934
Wa8730a010g003750	109.227	2.3135	4.6284e-05	0.0011377	36.5269	181.927	AT3G18390	EMB1865	CRS1 / YhbY (CRM) domain-containing protein
Wa8730a007g007690	254.004	2.35677	7.20671e-10	2.6601e-08	82.8884	425.119	AT1G76760;AT1G43560	ATY1, TRX-Y1, TY1, Aty2, ty2	Encodes a y-type thioredoxin (Trx-y1) localized in chloroplast stroma.;thioredoxin Y2
Wa8730a019g003060	84.9411	2.36124	0.000121608	0.00282863	27.6603	142.222	AT5G12410		THUMP domain-containing protein
Wa8730a005g005910	664.756	2.38079	4.79563e-18	2.86648e-16	214.26	1115.25	AT2G30970	ASP1	ASPARTATE AMINOTRANSFERASE 1
Wa8730a013g000890	61.8268	2.43339	0.000556491	0.0118207	19.2993	104.354
Wa8730a009g002290	64.1713	2.43667	0.000497474	0.0106071	20.0208	108.322	AT3G16840;AT5G27120;AT3G05060		P-loop containing nucleoside triphosphate hydrolases superfamily protein;SAR DNA-binding protein, putative, strong similarity to SAR DNA-binding protein-1 (Pisum sativum) GI:3132696; contains Pfam profile PF01798: Putative snoRNA binding domain; has similarity to MAR binding NOP58 protein;SAR DNA-binding protein, putative, strong similarity to SAR DNA-binding protein-1 (Pisum sativum) GI:3132696;…
Wa8730a009g006690	303.227	2.44612	5.56369e-12	2.39985e-10	93.9502	512.504
Wa8730a017g000030	188.847	2.45304	1.4349e-07	4.47483e-06	58.126	319.569	AT1G32350	AOX1D	alternative oxidase 1D
Wa8730a019g003670	73.7657	2.45761	0.000626952	0.0131194	22.814	124.717
Wa8730a007g008440	211.656	2.49434	4.83323e-10	1.84449e-08	63.805	359.507	AT3G10130		SOUL heme-binding family protein
Wa8730a002g009110	83.5682	2.49568	4.38532e-05	0.00108031	25.2063	141.93
Wa8730a012g000050	6580.63	2.50998	1.02532e-52	1.649e-50	1965.47	11195.8	AT3G52930;AT2G36460	AtFBA8, FBA8, FBA6	Aldolase superfamily protein;Aldolase superfamily protein
Wa8730a017g002490	48.191	2.54267	0.00129592	0.0258222	14.0829	82.2991
Wa8730a004g004550	72.7848	2.55164	0.00011816	0.00276559	21.1244	124.445
Wa8730a003g002230	77.7251	2.56182	3.7743e-05	0.000937994	22.5056	132.945	AT5G67570;AT2G16880	DG1, EMB1408, EMB246,	Encodes a pentratricopeptide repeat containing protein that is targeted to the chloroplast. Mutants have pale young leave and reduced accumulation of plastid encoded transcripts suggesting a role for DG1 in regulation of plastid gene expression.;Pentatricopeptide repeat (PPR) superfamily protein
Wa8730a004g003560	235.623	2.57774	7.9312e-12	3.39503e-10	67.5785	403.667	AT4G39620	ATPPR5, EMB2453	Tetratricopeptide repeat (TPR)-like superfamily protein
Wa8730a019g001100	332.646	2.58065	3.24284e-15	1.69018e-13	95.2388	570.054	AT2G38450;AT5G05360	,	;
Wa8730a009g005550	72.9972	2.6059	4.80786e-05	0.00117924	20.5572	125.437
Wa8730a006g002660	181.66	2.61815	4.13534e-10	1.58893e-08	50.9182	312.402
Wa8730a001g012240	324.094	2.62803	2.02018e-15	1.06277e-13	90.3	557.889	AT2G45800;AT2G39900;AT3G55770	PLIM2a, WLIM2a, WLIM2b	Encodes a member of the Arabidopsis LIM proteins: a family of actin bundlers with distinct expression patterns. WLIM1, WLIM2a, and WLIM2b are widely expressed, whereas PLIM2a, PLIM2b, and PLIM2c are predominantly expressed in pollen. Regulates actin cytoskeleton organization.;Encodes a member of the Arabidopsis LIM proteins: a family of actin bundlers with distinct expression patterns. WLIM1, WLI…
Wa8730a015g005980	51.3085	2.64503	0.000432029	0.00928202	14.1138	88.5033
Wa8730a009g000450	194.73	2.65087	7.55451e-11	3.00525e-09	53.4956	335.964	AT2G39670		Radical SAM superfamily protein
Wa8730a001g009900	38.8569	2.70523	0.0016373	0.0323382	10.3711	67.3426	AT4G34200	EDA9, PGDH1	Encodes a 3-phosphoglycerate dehydrogenase that is essential for embryo and pollen development.
Wa8730a006g000440	19541.7	2.71317	5.33372e-60	1.07227e-57	5171.37	33912.1	AT5G54770	THI1, THI4, TZ	Encodes a thiamine biosynthetic gene that has a dual function in thiamine biosynthesis and mitochondrial DNA damage tolerance. It appears to be involved in producing the thiazole portion of thiamine (vitamin B1). A crystal structure of the protein reveals that it forms a 2-ring homo-octamer.
Wa8730a011g005650	939.868	2.73776	1.57679e-32	1.46707e-30	245.25	1634.49	AT4G34200	EDA9, PGDH1	Encodes a 3-phosphoglycerate dehydrogenase that is essential for embryo and pollen development.
Wa8730a011g001590	104.619	2.75278	2.19942e-07	6.78385e-06	27.0006	182.238	AT5G46580;AT2G35130	,	pentatricopeptide (PPR) repeat-containing protein;Tetratricopeptide repeat (TPR)-like superfamily protein
Wa8730a005g005190	57.8629	2.76739	8.37528e-05	0.00198503	14.8044	100.922	AT3G61780	emb1703	embryo defective 1703
Wa8730a015g005150	163.799	2.77696	6.82952e-10	2.52917e-08	41.589	286.009
Wa8730a017g000330	70.9994	2.78203	1.1569e-05	0.000306329	18.0107	123.988	AT1G31970	STRS1	DEA(D/H)-box RNA helicase family protein
Wa8730a005g002560	104.835	2.78907	3.52875e-07	1.07369e-05	26.5567	183.113
Wa8730a003g002890	1091.82	2.78953	7.11283e-38	8.17104e-36	276.055	1907.58	AT3G29320	PHS1	Encodes a plastidic alpha-glucan phosphorylase. In vitro, the enzyme has a preference for maltooligosaccharides, such as maltoheptaose.
Wa8730a004g001000	62.7983	2.83207	2.55274e-05	0.000653154	15.495	110.102	AT1G53280;AT4G34020	AtDJ1B, DJ-1b, DJ1B, AtDJ1C, DJ-1c, DJ1C	Encodes a homolog of animal DJ-1 superfamily protein. In the A. thaliana genome, three genes encoding close homologs of human DJ-1 were identified AT3G14990 (DJ1A), AT1G53280 (DJ1B) and AT4G34020 (DJ1C). Among the three homologs, DJ1C is essential for chloroplast development and viability. It exhibits glyoxalase activity towards glyoxal and methylglyoxal.;Encodes a homolog of animal DJ-1 superfam…
Wa8730a003g005720	97.7272	2.85226	5.18178e-06	0.000142982	23.8251	171.629	AT5G43580	UPI	Predicted to encode a PR (pathogenesis-related) peptide that belongs to the PR-6 proteinase inhibitor family. Six putative PR-6-type protein encoding genes are found in Arabidopsis: At2g38900, At2g38870, At5g43570, At5g43580, At3g50020 and At3g46860.
Wa8730a001g012340	268.137	2.87273	2.46737e-16	1.34843e-14	64.4956	471.778	AT3G09050
Wa8730a007g005590	43.1486	2.88099	0.000342124	0.00749345	10.3094	75.9877	AT1G65560;AT3G03080;AT3G59845		Zinc-binding dehydrogenase family protein;Zinc-binding dehydrogenase family protein;Zinc-binding dehydrogenase family protein
Wa8730a015g003940	167.723	2.90828	6.05986e-11	2.46288e-09	39.5669	295.88	AT3G07650;AT5G48250	BBX7, COL9, BBX8	This gene belongs to the CO (CONSTANS) gene family. This gene family is divided in three subgroups: groups III, to which COL9 belongs, is characterised by one B-box (supposed to regulate protein-protein interactions) and a second diverged zinc finger. COL9 downregulates expression of CO (CONSTANS) as well as FT and SOC1 which are known regulatory targets of CO.;B-box type zinc finger protein with…
Wa8730a006g004290	41.6834	2.92574	0.000385687	0.00838236	9.7422	73.6247	AT1G26230;AT2G33210;AT3G23990	Cpn60beta4, HSP60-2, HSP60, HSP60-3B	Encodes a subunit of chloroplasts chaperonins that are involved in mediating the folding of newly synthesized, translocated, or stress-denatured proteins. Cpn60 subunits are: Cpn60alpha1 (At2g28000), AtCpn60alpha2 (At5g18820), AtCpn60beta1 (At1g55490), AtCpn60beta2 (At3g13470), AtCpn60beta3 (At5g56500), AtCpn60beta4 (At1g26230).;heat shock protein 60-2;mitochondrial chaperonin HSP. assist in rapi…
Wa8730a009g006620	6476.46	2.93562	8.53189e-76	2.74434e-73	1497.32	11455.6	AT2G21660;AT4G39260;AT3G03920;AT2G14160	ATGRP7, CCR2, GR-RBP7, GRP7, ATGRP8, CCR1, GR-RBP8, GRP8	Encodes a small glycine-rich RNA binding protein that is part of a negative-feedback loop through which AtGRP7 regulates the circadian oscillations of its own transcript. Gene expression is induced by cold. GRP7 appears to promote stomatal opening and reduce tolerance under salt and dehydration stress conditions, but, promotes stomatal closing and thereby increases stress tolerance under conditio…
Wa8730a006g003810	59.4787	2.9642	1.57694e-05	0.000410006	13.4849	105.473
Wa8730a010g000190	301.01	2.96569	6.18386e-19	3.82516e-17	68.4233	533.597
Wa8730a015g003830	31.5664	2.98776	0.00137805	0.0273617	7.04147	56.0913	AT5G55920;AT3G13180;AT4G26600	OLI2	Encodes a homolog of the S. cerevisiae Nop2 that is involved in ribosome biogenesis and plays a role on organ size control by promoting cell proliferation and preventing compensation in normal leaf development.;NOL1/NOP2/sun family protein / antitermination NusB domain-containing protein;S-adenosyl-L-methionine-dependent methyltransferases superfamily protein
Wa8730a008g004480	126.835	2.99009	5.97087e-10	2.22583e-08	28.3509	225.318	AT4G15210;AT2G32290	AT-BETA-AMY, ATBETA-AMY, BAM5, BMY1, RAM1, BAM6, BMY5	cytosolic beta-amylase expressed in rosette leaves and inducible by sugar. RAM1 mutants have reduced beta amylase in leaves and stems.;beta-amylase 6
Wa8730a007g002550	105.417	3.01721	1.41935e-08	4.8275e-07	23.2271	187.607	AT4G13850;AT3G23830;AT1G18630	ATGRP2, GR-RBP2, GRP2, AtGRP4, GR-RBP4, GRP4, GR-RBP6	Encodes a glycine-rich RNA-binding protein. Gene expression is induced by cold.;encodes a glycine-rich RNA binding protein. Gene expression is induced by cold and reduced by ionic (salt) and non-ionic (mannitol) osmotic stress. Lines overexpressing the gene are slightly more tolerant to osmotic stress during germination.;encodes a glycine-rich RNA binding protein.
Wa8730a008g001560	140.789	3.05589	3.28588e-11	1.35503e-09	30.2068	251.37	AT3G22310	ATRH9, PMH1	Sequence similarity ot DEAD-box RNA helicases. Binds RNA and DNA. Involved in drought, salt and cold stress responses.
Wa8730a011g001770	66.5437	3.06625	4.56313e-06	0.000126844	14.1755	118.912
Wa8730a010g006800	66.3573	3.06654	2.5992e-06	7.46475e-05	14.1138	118.601
Wa8730a003g003000	27.2373	3.07189	0.00211213	0.0408563	5.78363	48.6909	AT5G15550		Transducin/WD40 repeat-like superfamily protein
Wa8730a013g000260	27.7981	3.09984	0.00199	0.0388274	5.84532	49.7509
Wa8730a004g000600	65.2156	3.10606	3.12153e-06	8.89676e-05	13.6391	116.792	AT1G53490	HEI10	Encodes HEI10, a RING finger-containing protein. HEI10 belongs to a group of proteins well conserved among species known as ZMM. Required for class I crossover formation. The mRNA is cell-to-cell mobile.
Wa8730a014g000240	802.234	3.10787	1.24202e-41	1.58894e-39	166.807	1437.66	AT3G02360		6-phosphogluconate dehydrogenase family protein
Wa8730a018g002920	78.0213	3.11609	3.11227e-07	9.52119e-06	16.1547	139.888
Wa8730a013g005160	100.501	3.12817	4.96788e-09	1.73691e-07	20.6497	180.352	AT1G04620	HCAR	Encodes a 7-hydroxymethyl chlorophyll a reductase, an enzyme of the chlorophyll cycle that converts 7-hydroxymethyl chlorophyll a to chlorophyll a.
Wa8730a006g003680	2233.19	3.13414	1.98261e-72	5.72314e-70	456.729	4009.65	AT5G13420	TRA2	Aldolase-type TIM barrel family protein
Wa8730a018g002730	23.7445	3.25143	0.00245394	0.0467453	4.5258	42.9631	AT4G15850	ATRH1, RH1	plant DEAD box-like RNA helicase.
Wa8730a002g005290	250.186	3.2943	5.00592e-20	3.18399e-18	46.1765	454.196	AT2G21250		NAD(P)-linked oxidoreductase superfamily protein
Wa8730a020g002380	24.4446	3.29825	0.00187896	0.0368524	4.5258	44.3635	AT3G23710	AtTic22-III, Tic22-III	Tic22-like family protein
Wa8730a020g002080	224.411	3.30629	5.88826e-19	3.66243e-17	41.2069	407.615	AT1G18640	PSP, PSP1	Encodes a 3-phosphoserine phosphatase acting in the last step of serine biosynthesis within the chloroplast.
Wa8730a006g001520	24.9698	3.33239	0.00154571	0.0306366	4.5258	45.4138
Wa8730a004g007170	387.342	3.35536	1.23711e-29	1.03935e-27	69.0214	705.663	AT1G06460	ACD31.2, ACD32.1	ACD32.1 encodes an alpha-crystallin domain containing protein with homology to small heat shock proteins.
Wa8730a018g003360	72.7804	3.36263	8.19186e-08	2.61317e-06	12.9176	132.643
Wa8730a018g000030	163.984	3.36833	4.05122e-15	2.10178e-13	28.9182	299.05	AT5G05740	ATEGY2, EGY2	S2P-like putative metalloprotease, also contain transmembrane helices near their C-termini and many of them, five of seven, contain a conserved zinc-binding motif HEXXH. Homolog of EGY1. Each of the EGY1 and EGY-like proteins share two additional highly conserved motifs, the previously reported NPDG motif (aa 442454 in EGY1, Rudner et al., 1999) and a newly defined GNLR motif (aa 171179 in EGY1).…
Wa8730a003g002140	44.3357	3.38781	2.31393e-05	0.000598857	7.76291	80.9085	AT1G27770;AT4G37640;AT2G22950	ACA1, PEA1, ACA2, ACA7	Encodes a chloroplast envelope Ca2+-ATPase with an N-terminal autoinhibitor.;Encodes a calmodulin-regulated Ca(2+)-pump located in the endoplasmic reticulum. Belongs to plant 2B ATPase's with an N-terminal autoinhibitor.;Encodes a putative auto-regulated Ca2+-ATPase located in the plasma membrane involved in transporting Ca2+ outside developing pollen grains. This activity is important to support…
Wa8730a006g002510	22.3675	3.41057	0.00249749	0.0474223	3.80435	40.9307	AT4G18900		Transducin/WD40 repeat-like superfamily protein
Wa8730a004g006600	1195.65	3.46732	3.80078e-63	8.73248e-61	198.148	2193.14	AT1G75380;AT1G19660	ATBBD1, BBD1, AtBBD2, BBD2	Encodes a nucleases AtBBD1 involved in ABA-mediated callose deposition.;Wound-responsive family protein
Wa8730a016g004300	3118.43	3.50422	1.51268e-105	8.10938e-103	505.224	5731.63	AT1G02305;AT4G16190	,	Encodes a capase involved in stress induced cell death.;Papain family cysteine protease
Wa8730a007g005040	75.5484	3.50963	3.11036e-08	1.03599e-06	12.1037	138.993	AT1G09400		FMN-linked oxidoreductases superfamily protein
Wa8730a017g000040	1327.27	3.52856	1.49077e-71	4.19576e-69	211.51	2443.03
Wa8730a002g008180	874.269	3.61493	4.3492e-60	8.90243e-58	131.858	1616.68
Wa8730a011g005040	47.68	3.64406	3.86501e-06	0.000108355	7.04147	88.3186	AT3G20810	JMJ30, JMJD5	JMJD5 encodes a protein which contains a jumonji-C (jmjC) domain. jmjd5 mutant plants have a short-period circadian phenotype. JMJD5 has histone demethylase activity and interacts with EFM to repress FT.
Wa8730a017g003810	132.187	3.66327	6.8208e-14	3.30985e-12	19.4227	244.952
Wa8730a017g000660	27.105	3.70063	0.000408518	0.00882745	3.86604	50.344	AT4G25100;AT5G51100	ATFSD1, FSD1, FSD2	Fe-superoxide dismutase;Fe superoxide dismutase whose mRNA levels are increased in response to exposure to UV-B.
Wa8730a003g006370	335.446	3.79653	4.51654e-32	4.10058e-30	44.9804	625.912	AT4G08840;AT1G78160;AT1G22240	APUM11, PUM11, APUM7, PUM7, APUM8, PUM8	Encodes a member of the Arabidopsis Pumilio (APUM) proteins containing PUF domain (eight repeats of approximately 36 amino acids each). PUF proteins regulate both mRNA stability and translation through sequence-specific binding to the 3' UTR of target mRNA transcripts.;Encodes a member of the Arabidopsis Pumilio (APUM) proteins containing PUF domain (eight repeats of approximately 36 amino acids …
Wa8730a001g009770	21.7386	3.99268	0.000855549	0.0175442	2.54651	40.9307	AT4G22140;AT4G39100	EBS, SHL1	PHD finger family protein / bromo-adjacent homology (BAH) domain-containing protein;Putative transcription factor containing a PHD finger and BAH motif, required for normal development
Wa8730a010g003560	41.1846	4.11027	3.67597e-06	0.00010398	4.49495	77.8743
Wa8730a006g001790	312.957	4.11335	1.28117e-32	1.22232e-30	34.3196	591.594	AT3G22310;AT5G40490;AT1G15830	ATRH9, PMH1	Sequence similarity ot DEAD-box RNA helicases. Binds RNA and DNA. Involved in drought, salt and cold stress responses.;HLP1 is a member of the conserved hnRNP A/B family and contains RNA Recognition Motifs (RRM).It binds mRNA and appears to be involved in targeting alternative polyadenylation (APA). APA targets include genes involved in flowering. Loss of HLP1 function results causes late floweri…
Wa8730a003g007690	252.643	4.1787	5.32663e-28	4.37716e-26	26.5259	478.76	AT5G57360;AT1G68050	ADO1, FKL2, LKP1, ZTL, ADO3, FKF1	Encodes clock-associated PAS protein ZTL; Also known as FKF1-like protein 2 or ADAGIO1(ADO1). A protein containing a PAS domain ZTL contributes to the plant fitness (carbon fixation, biomass) by influencing the circadian clock period. ZTL is the F-box component of an SCF complex implicated in the degradation of TOC1.;Encodes FKF1, a flavin-binding kelch repeat F box protein, is clock-controlled, …
Wa8730a009g002970	26.0174	4.26265	0.000275263	0.00611225	2.54651	49.4882	AT2G38870		Predicted to encode a PR (pathogenesis-related) peptide that belongs to the PR-6 proteinase inhibitor family. Six putative PR-6-type protein encoding genes are found in Arabidopsis: At2g38900, At2g38870, At5g43570, At5g43580, At3g50020 and At3g46860.
Wa8730a004g000210	140.062	4.30077	1.84846e-17	1.06173e-15	13.5157	266.609
Wa8730a003g004200	205.569	4.33968	3.28377e-24	2.44826e-22	19.4227	391.715	AT3G52070
Wa8730a020g001790	296.969	4.3525	2.12586e-33	2.11796e-31	27.7837	566.155	AT5G63420	emb2746	Encodes a member of the metallo-beta-lactamase protein family that plays a vital role in embryo morphogenesis and apical-basal pattern formation by regulating chloroplast development. In bacteria, RNase J plays an important role in rRNA maturation and in the 5&#8242; stability of mRNA.
Wa8730a003g005820	49.9636	4.39728	2.44283e-07	7.51405e-06	4.58748	95.3396	AT3G46860;AT5G43570	,	Predicted to encode a PR (pathogenesis-related) peptide that belongs to the PR-6 proteinase inhibitor family. Six putative PR-6-type protein encoding genes are found in Arabidopsis: At2g38900, At2g38870, At5g43570, At5g43580, At3g50020 and At3g46860.;Predicted to encode a PR (pathogenesis-related) peptide that belongs to the PR-6 proteinase inhibitor family. Six putative PR-6-type protein encodin…
Wa8730a010g005880	353.149	4.48139	1.063e-38	1.27312e-36	30.2068	676.091	AT1G80920	AtJ8, AtToc12, DJC22, J8, Toc12	A nuclear encoded soluble protein found in the chloroplast stroma.
Wa8730a002g000310	41.6635	4.63779	1.37272e-06	4.03501e-05	3.20627	80.1207
Wa8730a002g006600	633.391	4.67667	2.8222e-65	6.76007e-63	47.6811	1219.1	AT5G23240	DJC76	DNAJ heat shock N-terminal domain-containing protein
Wa8730a008g004490	62.4231	4.73883	3.62398e-09	1.28298e-07	4.49495	120.351	AT1G11530;AT3G08710	ATCXXS1, CXXS1, ATH9, TH9, TRX	Encodes a monocysteinic thioredoxin, thioredoxin in which the second cysteine of the redox site is replaced by a serine, with low disulfide reductase but efficient disulfide isomerase activity.;Associated to plasma membrane. Moves cell to cell, suggesting a role in intercellular communication.
Wa8730a013g004290	580.17	5.07137	6.31809e-60	1.24788e-57	33.5365	1126.8
Wa8730a006g006940	1887.76	5.1257	4.46031e-141	4.18452e-138	105.382	3670.13	AT5G06690	WCRKC1	Encodes a thioredoxin (WCRKC1) localized in chloroplast stroma. Contains a WCRKC motif.
Wa8730a016g002080	23.6729	5.1544	0.000276868	0.00613578	1.31952	46.0264
Wa8730a003g007960	185.523	5.43855	5.34099e-23	3.78169e-21	8.2993	362.746	AT1G19670	ATCLH1, ATHCOR1, CLH1, CORI1	Chlorophyllase is the first enzyme involved in chlorophyll degradation. It catalyzes the hydrolysis of the ester bond to yield chlorophyllide and phytol. AtCLH1 lacks a typical signal sequence for the chloroplast. Its expression is induced rapidly by methyljasmonate, a known promoter of senescence and chlorophyll degradation.
Wa8730a002g001270	291.851	5.79633	1.05942e-32	1.01939e-30	10.3711	573.331
Wa8730a005g006660	282.695	6.17304	2.34311e-30	2.04486e-28	7.76291	557.626	AT1G10657		Plant protein 1589 of unknown function
Wa8730a004g007200	788.492	6.33272	6.85638e-74	2.03129e-71	19.361	1557.62	AT1G06460	ACD31.2, ACD32.1	ACD32.1 encodes an alpha-crystallin domain containing protein with homology to small heat shock proteins.
Wa8730a006g005960	33.0579	6.66668	0.000156305	0.00358388	0.659761	65.4561	AT5G16650		Chaperone DnaJ-domain superfamily protein
Wa8730a008g004670	13.7213	6.85315	0.000242908	0.0054367	0	27.4427
Wa8730a005g007140	17.796	7.23618	8.30302e-05	0.00197205	0	35.592

## Sheet: SC A Dusk vs Dawn
Dataset S9. Differential Expressed Genes for Supercluster A in Dusk vs. Dawn
Genes significantly differentially expressed (log2FC>1 & p_val_adj <0.05) with PCT > 10% in either PCT1 or PCT2
PCT1: Percentage of cells within the Dusk Supercluster expressing the gene
PCT2: Percentage of cells outside the Dawn Supercluster expressing the gene
Gene	Dusk Expression	Dawn Expression	Ave. Log2 FC	p Value	Adj. p Value	PCT1	PCT2	Arabidopsis Orthologues	Arabidopsis Gene Description
Wa8730a001g000540	1.70879	2.44064	-1.05584	3.07219e-68	4.28324e-64	0.628	0.865	AT2G47170.1	intracellular protein transport, protein ADP-ribosylation, Golgi apparatus
Wa8730a001g001120	3.09892	3.8435	-1.0742	4.9766e-60	6.93838e-56	0.741	0.937	.	membrane, lipid transport, lipid localization
Wa8730a001g003240	0.559542	1.30953	-1.08201	9.34503e-42	1.30288e-37	0.201	0.486	AT1G23330.1	0
Wa8730a001g004310	0.705571	1.78013	-1.55026	6.74839e-80	9.4086e-76	0.215	0.639	AT5G04950.1,AT1G09240.1,AT1G56430.1,AT5G56080.1	phloem transport, multi-multicellular organism process, cell differentiation
Wa8730a001g005190	1.19693	0.440015	1.09199	9.17149e-40	1.27869e-35	0.468	0.181	AT5G17790.1	chloroplast stroma, chloroplast mRNA modification, chloroplast organization
Wa8730a001g006900	1.07216	1.96764	-1.2919	4.49079e-75	6.26106e-71	0.425	0.769	AT5G05580.1,AT2G29980.1,AT3G11170.1	unsaturated fatty acid biosynthetic process, plastid membrane, omega-3 fatty acid desaturase activity
Wa8730a001g007340	2.97832	3.71971	-1.0696	1.10213e-58	1.5366e-54	0.794	0.936	AT5G57550.1,AT2G18800.1,AT4G30270.1,AT2G06850.1,AT4G14130.1,AT4G25810.1	response to brassinosteroid, xyloglucan:xyloglucosyl transferase activity, response to mechanical stimulus
Wa8730a001g008080	1.79216	0.976414	1.17688	4.36868e-41	6.09081e-37	0.647	0.438	AT4G31985.1,AT2G25210.1,AT3G02190.1	antibacterial humoral response, cytosolic large ribosomal subunit, innate immune response in mucosa
Wa8730a001g008200	1.51518	0.732112	1.12973	4.33864e-33	6.04893e-29	0.564	0.337	AT3G02560.1	cytoplasmic translation, small-subunit processome, 90S preribosome
Wa8730a001g008620	0.866578	0.146884	1.0383	1.8736e-46	2.61218e-42	0.358	0.062	.	response to arsenic-containing substance, response to ethanol, response to copper ion
Wa8730a001g009230	0.610791	1.68414	-1.54851	3.28705e-47	4.5828e-43	0.091	0.381	AT5G48000.1,AT1G13090.2,AT1G50520.1,AT4G12330.1	thalian-diol desaturase activity, oxidoreductase activity, acting on paired donors, with incorporation or reduction of molecular oxygen, NAD(P)H as one donor, and incorporation of one atom of oxygen, thalianol metabolic process
Wa8730a001g009730	1.94243	0.979598	1.38907	5.93175e-57	8.27005e-53	0.681	0.433	AT1G07070.1,AT1G74270.1	structural constituent of ribosome, ribosome biogenesis, cytosolic large ribosomal subunit
Wa8730a001g011910	0.168343	0.871221	-1.01404	1.20363e-57	1.67811e-53	0.071	0.38	AT2G39770.1,AT3G55590.1	cellulose biosynthetic process, obsolete cofactor metabolic process, response to heat
Wa8730a001g011950	1.53568	0.773083	1.10019	1.44062e-36	2.00852e-32	0.587	0.352	.	structural constituent of ribosome, cytoplasmic translation, cytosolic large ribosomal subunit
Wa8730a001g012160	1.02925	0.0329745	1.43733	5.41846e-68	7.55442e-64	0.385	0.021	AT2G39890.1,AT2G36590.1,AT3G55740.1	proline transport, amino acid import, proline transmembrane transport
Wa8730a001g012480	2.95289	3.69668	-1.07306	4.4051e-112	6.1416e-108	0.898	0.983	AT5G60660.1,AT2G39010.1,AT2G37180.1,AT3G53420.1,AT2G45960.1,AT4G35100.1	obsolete plasma membrane part, obsolete membrane part, water channel activity
Wa8730a001g012670	0.236549	1.07297	-1.20671	2.06399e-79	2.87762e-75	0.073	0.467	AT2G38230.1,AT5G01410.1	protein heterodimerization activity, response to lipid hydroperoxide, response to non-ionic osmotic stress
Wa8730a002g001130	0.205005	1.01913	-1.17454	2.32184e-66	3.2371e-62	0.08	0.427	AT5G52740.1	metal ion transport, 0, cellular transition metal ion homeostasis
Wa8730a002g001270	1.19055	0.0009667	1.7162	5.87772e-83	8.19472e-79	0.416	0.001	.	0
Wa8730a002g002780	1.43959	0.721309	1.03626	8.54946e-33	1.19197e-28	0.558	0.331	AT3G60770.1,AT4G00100.1	cytosolic small ribosomal subunit, translation, small ribosomal subunit rRNA binding
Wa8730a002g002800	1.5154	0.628541	1.27947	1.8943e-47	2.64104e-43	0.583	0.297	AT5G62300.1,AT3G47370.1	polysome, cell wall, cytosolic ribosome
Wa8730a002g003100	0	1.03463	-1.49265	1.25294e-122	1.74684e-118	0	0.46	.	RNA polymerase II transcription factor binding, negative regulation of long-day photoperiodism, flowering, nucleus
Wa8730a002g003810	0.15266	0.888307	-1.06132	2.12935e-69	2.96874e-65	0.06	0.407	AT5G37260.1	LHY
Wa8730a002g004760	0.0243759	1.26087	-1.78389	9.35286e-121	1.30398e-116	0.007	0.47	.	0
Wa8730a002g004910	0.759904	1.47296	-1.02872	1.73993e-47	2.42581e-43	0.279	0.597	AT4G35190.1,AT2G28305.1,AT5G03270.1,AT5G06300.1	regulation of meristem development, cytokinin biosynthetic process, nucleus
Wa8730a002g005390	2.324	1.3845	1.35541	2.44676e-75	3.41127e-71	0.799	0.613	AT4G00810.1,AT1G32850.1	activation of protein kinase activity, protein kinase activator activity, cytoplasmic translation
Wa8730a002g008980	1.4961	0.771604	1.04522	3.70457e-31	5.16491e-27	0.568	0.362	.	structural constituent of ribosome, cytoplasmic translation, cytosolic large ribosomal subunit
Wa8730a002g010030	1.49922	2.26101	-1.09903	1.34785e-56	1.87917e-52	0.54	0.802	AT3G07090.1	0
Wa8730a003g000120	2.20957	2.90435	-1.00235	1.51531e-89	2.11264e-85	0.803	0.954	AT4G37930.1	L-serine metabolic process, circadian rhythm, glycine metabolic process
Wa8730a003g000980	1.49197	2.24407	-1.08505	1.08595e-32	1.51403e-28	0.377	0.65	AT3G49780.1,AT4G37720.1,AT2G22860.1	obsolete extracellular region part, extracellular matrix, cell population proliferation
Wa8730a003g002350	1.45756	0.40724	1.51529	2.29291e-64	3.19677e-60	0.556	0.195	.	structural constituent of ribosome, cytosolic large ribosomal subunit, ribonucleoprotein complex assembly
Wa8730a003g002510	0.059358	1.06211	-1.44667	1.14935e-105	1.60243e-101	0.019	0.448	AT2G15020.1	0
Wa8730a003g002650	0.354391	1.12318	-1.10912	1.84251e-64	2.56882e-60	0.143	0.513	AT5G39550.1,AT1G18660.1	positive regulation of chromatin silencing, positive regulation of DNA methylation-dependent heterochromatin assembly, cellular ammonium homeostasis
Wa8730a003g004710	2.07656	1.10276	1.40491	3.8141e-61	5.31761e-57	0.717	0.491	AT5G64140.1	intracellular anatomical structure, cytoplasm, obsolete intracellular part
Wa8730a003g005060	1.6699	2.51727	-1.22249	3.31049e-66	4.61549e-62	0.457	0.797	AT1G25450.1,AT1G19440.1,AT5G43760.1,AT4G34510.1,AT1G68530.1,AT2G26640.1	suberin biosynthetic process, response to light stimulus, response to cold
Wa8730a003g006060	1.70006	0.810468	1.28341	4.3479e-45	6.06184e-41	0.621	0.372	AT5G10360.1	polysomal ribosome, ribosomal small subunit biogenesis, cytosolic small ribosomal subunit
Wa8730a003g006370	1.11062	0.0677083	1.5046	3.66398e-75	5.10832e-71	0.436	0.036	AT1G78160.2,AT1G22240.1,AT4G08840.1	negative regulation of post-embryonic development, negative regulation of seed dormancy process, negative regulation of seed maturation
Wa8730a003g006960	1.45118	0.575403	1.26348	2.37092e-45	3.30553e-41	0.541	0.246	AT5G20720.3	unfolded protein binding, positive regulation of response to reactive oxygen species, positive regulation of superoxide dismutase activity
Wa8730a003g007560	1.45836	0.620805	1.20834	7.35403e-45	1.0253e-40	0.555	0.274	.	structural constituent of ribosome, cytoplasmic translation, cytosolic large ribosomal subunit
Wa8730a003g007960	0.74179	0.00945129	1.05654	5.3801e-60	7.50094e-56	0.325	0.004	AT1G19670.1	chlorophyll catabolic process, chlorophyllase activity, obsolete cofactor metabolic process
Wa8730a004g001280	0.130643	0.863223	-1.05689	1.79978e-61	2.50925e-57	0.061	0.378	AT3G18560.1,AT1G49000.1	0
Wa8730a004g002220	1.37788	2.22728	-1.22542	9.95484e-40	1.3879e-35	0.308	0.61	AT5G55620.1,AT5G41761.1	0
Wa8730a004g002250	1.50868	0.66546	1.2165	1.04517e-42	1.45717e-38	0.547	0.255	.	0
Wa8730a004g002800	1.47763	0.651715	1.19154	7.84461e-45	1.0937e-40	0.591	0.311	AT4G16830.1	regulation of abscisic acid-activated signaling pathway, cellular response to salt stress, perinuclear region of cytoplasm
Wa8730a004g003190	1.13439	1.82928	-1.00253	4.92328e-36	6.86404e-32	0.462	0.702	.	0
Wa8730a004g004080	0.661851	1.82264	-1.67467	9.19851e-95	1.28246e-90	0.184	0.65	AT1G79160.1,AT1G16500.1	0
Wa8730a004g004690	1.77523	1.00505	1.11113	3.8621e-36	5.38454e-32	0.646	0.47	AT3G23390.1	obsolete cytosolic part, cytosolic large ribosomal subunit, cytosolic ribosome
Wa8730a004g005080	1.01863	1.80517	-1.13474	4.76016e-34	6.63661e-30	0.307	0.572	AT4G05070.1	0
Wa8730a004g005980	1.0273	2.07246	-1.50785	4.88271e-102	6.80748e-98	0.394	0.812	AT1G78510.1,AT2G34630.2,AT1G17050.1	obsolete coenzyme biosynthetic process, obsolete coenzyme metabolic process, obsolete cofactor biosynthetic process
Wa8730a004g007170	1.3707	0.145185	1.76804	4.15617e-77	5.79453e-73	0.483	0.07	AT1G06460.1	0
Wa8730a004g007640	0.281965	0.978472	-1.00485	1.44226e-56	2.0108e-52	0.134	0.467	AT4G32770.1	phloem sucrose loading, chloroplast thylakoid, obsolete cofactor metabolic process
Wa8730a004g007740	0.953387	2.25065	-1.87155	4.13474e-88	5.76466e-84	0.192	0.645	AT1G03870.1	obsolete plasma membrane part, anchored component of plasma membrane, plant-type cell wall
Wa8730a004g007750	1.52222	0.687427	1.20435	5.67923e-46	7.91798e-42	0.588	0.311	.	cytosolic ribosome, maturation of SSU-rRNA from tricistronic rRNA transcript (SSU-rRNA, 5.8S rRNA, LSU-rRNA), cell wall
Wa8730a004g008090	1.77222	0.794108	1.41112	2.78743e-63	3.88623e-59	0.665	0.357	AT2G18110.1,AT5G12110.1	cytoplasm, cytosol, obsolete cytoplasmic part
Wa8730a005g000060	0.933897	2.01762	-1.56348	2.74034e-80	3.82058e-76	0.358	0.723	AT2G25490.1,AT5G25350.1	negative regulation of ethylene-activated signaling pathway, response to ethylene, SCF ubiquitin ligase complex
Wa8730a005g000380	0.669755	1.81145	-1.64712	1.18038e-115	1.64569e-111	0.26	0.756	AT1G52590.1	chloroplast stroma, 0, plastoglobule
Wa8730a005g001190	0.650126	1.796	-1.65314	4.12318e-106	5.74854e-102	0.251	0.728	.	chloroplast thylakoid, chloroplast thylakoid membrane, response to light intensity
Wa8730a005g002440	1.89607	0.950556	1.36408	4.1788e-59	5.82608e-55	0.684	0.411	AT2G19750.1,AT5G56670.1,AT4G29390.1	cytosolic ribosome, cytosolic small ribosomal subunit, structural constituent of ribosome
Wa8730a005g003460	0.229162	1.31673	-1.56903	2.05417e-76	2.86393e-72	0.061	0.433	AT5G25610.1	obsolete Golgi apparatus part, endosome, trans-Golgi network
Wa8730a005g003480	2.129	2.88338	-1.08835	1.97661e-37	2.75579e-33	0.48	0.726	AT5G25610.1	trans-Golgi network, endosome, Golgi apparatus
Wa8730a005g004920	0.650542	2.40355	-2.52905	2.79276e-70	3.89367e-66	0.115	0.48	.	endosome, trans-Golgi network, obsolete Golgi apparatus part
Wa8730a005g006590	1.36704	0.583138	1.13093	3.76905e-38	5.25481e-34	0.529	0.266	AT5G45775.2,AT2G42740.1,AT4G18730.1,AT3G58700.1	ribosomal large subunit biogenesis, obsolete cytosolic part, nucleolus
Wa8730a005g008000	0.722847	1.84838	-1.6238	2.08884e-99	2.91226e-95	0.314	0.739	AT1G53670.1	chloroplast stroma, peptide-methionine (R)-S-oxide reductase activity, response to oxidative stress
Wa8730a005g008830	2.84067	4.51008	-2.40846	1.43311e-223	1.99804e-219	0.809	0.99	AT1G30020.1	0
Wa8730a006g000470	2.20823	1.41905	1.13855	1.3468e-47	1.8777e-43	0.777	0.57	AT1G11860.1	cytosolic ribosome, mitochondrion, obsolete cytoplasmic part
Wa8730a006g000480	0.225213	0.925559	-1.01039	3.25981e-61	4.54483e-57	0.089	0.426	AT1G62250.1	0
Wa8730a006g000580	0.331328	1.05236	-1.04023	3.40393e-62	4.74576e-58	0.12	0.477	AT2G32480.1,AT1G05140.1	chloroplast envelope, response to cold, proteolysis
Wa8730a006g001720	2.20199	1.34338	1.23871	1.16107e-56	1.61876e-52	0.76	0.547	AT5G47930.1	ribosome assembly, ribosomal small subunit assembly, ribosomal small subunit biogenesis
Wa8730a006g001790	1.2298	0.0138597	1.75422	2.82079e-94	3.93275e-90	0.467	0.004	AT1G15830.1,AT5G40490.1,AT3G22310.1	nucleolus, RNA helicase activity, RNA secondary structure unwinding
Wa8730a006g002120	2.62353	1.7787	1.21883	4.37178e-32	6.09514e-28	0.774	0.672	AT4G24715.1,AT5G50200.3	anion transmembrane transport, nitrate transmembrane transporter activity, response to wounding
Wa8730a006g003080	0.234764	1.47	-1.78207	2.50581e-121	3.49359e-117	0.068	0.585	AT4G14090.1,AT2G43820.1,AT1G05560.2,AT1G24100.1	anthocyanin 5-O-glucosyltransferase activity, UDP-glucose:4-aminobenzoate acylglucosyltransferase activity, para-aminobenzoic acid metabolic process
Wa8730a006g004210	1.69473	0.62039	1.54994	1.31386e-67	1.83179e-63	0.642	0.299	AT5G39740.1	cell population proliferation, ribosomal large subunit assembly, nucleocytoplasmic transport
Wa8730a006g004520	2.19499	1.28672	1.31036	8.37709e-71	1.16793e-66	0.761	0.567	.	cell cortex, cortical microtubule, transverse to long axis, perinuclear region of cytoplasm
Wa8730a006g004770	1.40404	0.60889	1.14716	3.61087e-39	5.03428e-35	0.548	0.287	AT5G15200.1,AT5G39850.1	cytosolic small ribosomal subunit, rRNA binding, positive regulation of translational fidelity
Wa8730a006g005670	0.193579	1.43623	-1.79276	7.82956e-133	1.0916e-128	0.082	0.623	AT5G14740.1,AT4G33580.1,AT1G70410.2	response to anesthetic, carbonate dehydratase activity, negative regulation of stomatal complex development
Wa8730a006g007110	1.43041	0.64291	1.13612	2.33638e-39	3.25737e-35	0.564	0.319	AT3G53870.1	cytoplasmic translation, oxidized purine nucleobase lesion DNA N-glycosylase activity, damaged DNA binding
Wa8730a007g000880	1.98297	2.69495	-1.02718	1.13769e-39	1.58617e-35	0.522	0.765	AT3G01270.1,AT3G53190.1,AT5G04310.1,AT3G27400.2,AT5G63180.1,AT3G24670.1,AT5G48900.1,AT4G24780.1,AT1G67750.1,AT4G13710.1,AT1G04680.1	response to nematode, pectate lyase activity, cell wall modification involved in multidimensional cell growth
Wa8730a007g002290	2.12911	1.20191	1.33767	1.68e-58	2.34225e-54	0.73	0.519	.	polysome, polysomal ribosome, cytosolic large ribosomal subunit
Wa8730a007g002730	0.747334	1.86246	-1.60879	9.46905e-99	1.32018e-94	0.262	0.718	.	0
Wa8730a007g004870	1.402	0.676282	1.04699	9.08462e-30	1.26658e-25	0.5	0.266	AT4G10060.1,AT5G49900.1,AT1G33700.1	central nervous system development, central nervous system neuron development, obsolete membrane part
Wa8730a007g005570	0.455253	1.51785	-1.53301	2.02975e-95	2.82988e-91	0.174	0.628	AT3G03080.1,AT1G65560.1,AT3G59845.1	response to oxidative stress, 2-alkenal reductase [NAD(P)+] activity, 0
Wa8730a007g007620	1.13728	1.92515	-1.13665	5.06326e-20	7.05919e-16	0.31	0.494	.	extracellular space, chitinase activity, lysozyme activity
Wa8730a007g008380	2.16012	1.23503	1.33463	1.55961e-65	2.17441e-61	0.766	0.56	AT2G16360.1,AT4G34555.1,AT4G39200.1	cytosolic ribosome, cytosolic small ribosomal subunit, structural constituent of ribosome
Wa8730a007g008500	0.616157	1.31481	-1.00795	7.41842e-50	1.03428e-45	0.268	0.59	AT3G44450.1	translation elongation factor activity, mitochondrial translational elongation, response to karrikin
Wa8730a007g008540	2.43805	1.48001	1.38216	3.37979e-79	4.71211e-75	0.814	0.63	AT2G36170.1,AT3G52590.1	structural constituent of ribosome, 0, cytosolic large ribosomal subunit
Wa8730a007g009070	2.99844	2.16381	1.20412	8.05766e-50	1.1234e-45	0.881	0.702	AT2G27860.1,AT1G08200.1	obsolete coenzyme binding, NAD binding, nucleotide-sugar biosynthetic process
Wa8730a008g000240	1.31608	2.21745	-1.3004	4.43886e-99	6.18866e-95	0.477	0.855	.	extrinsic component of thylakoid membrane, chromoplast, photosystem II assembly
Wa8730a008g000260	0.0360842	1.39109	-1.95486	1.27135e-98	1.77252e-94	0.016	0.415	AT3G63240.1	inositol phosphate dephosphorylation, phosphatidylinositol-3,4,5-trisphosphate 5-phosphatase activity, phosphatidylinositol dephosphorylation
Wa8730a008g000460	2.79205	1.31732	2.1276	1.03818e-64	1.44743e-60	0.703	0.421	.
Wa8730a008g000510	2.3223	0.536659	2.57614	3.59378e-55	5.01045e-51	0.436	0.099	.
Wa8730a008g002170	0.397025	1.18886	-1.14238	4.2604e-52	5.93985e-48	0.168	0.484	AT4G33770.1	seed development, inositol tetrakisphosphate 1-kinase activity, phosphorylation
Wa8730a008g003960	4.60079	3.51014	1.57348	1.02542e-47	1.42965e-43	0.885	0.739	.
Wa8730a008g005750	1.5258	0.740735	1.13261	1.97597e-30	2.7549e-26	0.49	0.246	AT4G21480.1,AT1G11260.1,AT1G50310.1	high-affinity glucose:proton symporter activity, glucose import, proton transmembrane transport
Wa8730a009g000030	1.99439	1.25877	1.06127	2.02554e-41	2.82401e-37	0.732	0.524	AT2G29690.1,AT2G38140.1,AT3G55870.3,AT5G05730.1	anthranilate synthase complex, tryptophan biosynthetic process, anthranilate synthase activity
Wa8730a009g000440	2.15436	1.25998	1.29031	1.7909e-64	2.49687e-60	0.767	0.55	AT3G55440.1	gluconeogenesis, nucleotide catabolic process, obsolete coenzyme metabolic process
Wa8730a009g000600	1.72269	2.4775	-1.08896	2.07762e-58	2.89661e-54	0.589	0.828	AT5G02500.1,AT3G09440.1	response to virus, response to heat, response to high light intensity
Wa8730a009g001000	1.1405	0.234006	1.30779	2.25382e-57	3.14227e-53	0.456	0.106	AT5G02810.1,AT5G60100.4	circadian rhythm, red or far-red light signaling pathway, negative regulation of long-day photoperiodism, flowering
Wa8730a009g001610	4.44493	5.4143	-1.39851	2.21549e-84	3.08883e-80	0.72	0.943	AT5G59320.1	regulation of cutin biosynthetic process, lipid localization, phospholipid transfer to membrane
Wa8730a009g001620	0.978293	1.81855	-1.21223	2.96048e-28	4.12751e-24	0.138	0.365	AT5G05270.1	chalcone isomerase activity, response to karrikin, endoplasmic reticulum
Wa8730a009g001840	0.0299562	0.780282	-1.08249	2.45505e-83	3.42283e-79	0.013	0.361	.	0
Wa8730a009g001850	0.956564	2.27119	-1.8966	1.3065e-98	1.82152e-94	0.307	0.741	AT2G41310.1,AT3G57040.2,AT5G62920.1,AT1G19050.1	phosphorelay response regulator activity, circadian rhythm, nucleus
Wa8730a009g002550	1.40234	0.7051	1.00591	2.92084e-28	4.07223e-24	0.541	0.341	.	0
Wa8730a009g003340	1.11652	2.01574	-1.2973	8.1692e-60	1.13895e-55	0.413	0.719	AT2G38620.2,AT1G09600.1,AT3G54180.1	regulation of cell cycle G1/S phase transition, cotyledon development, cyclin-dependent protein kinase holoenzyme complex
Wa8730a009g005310	1.31292	0.548446	1.10291	5.42613e-33	7.56511e-29	0.49	0.241	AT5G22020.2	endoplasmic reticulum, vacuole, vacuolar membrane
Wa8730a009g005820	1.76282	0.881923	1.27087	2.16985e-47	3.0252e-43	0.643	0.4	AT3G57490.1,AT1G58380.1	gene expression, nucleolus, plasmodesma
Wa8730a009g006530	1.38924	0.63298	1.09106	1.60942e-34	2.24386e-30	0.534	0.305	.	cytosolic ribosome, cytosolic small ribosomal subunit, structural constituent of ribosome
Wa8730a009g006690	1.03898	0.0882402	1.37163	9.98825e-65	1.39256e-60	0.416	0.053	.	U4atac snRNA binding, U4/U6 x U5 tri-snRNP complex, U4atac snRNP
Wa8730a010g001720	0.126091	1.15613	-1.48603	4.63894e-104	6.46761e-100	0.048	0.494	AT5G24120.2	obsolete transcription factor activity, core RNA polymerase binding, obsolete transcription factor activity, protein binding, cellular response to blue light
Wa8730a010g001790	1.55967	0.414855	1.65163	4.0432e-73	5.63702e-69	0.586	0.196	AT5G14590.1,AT1G65930.1	response to zinc ion, isocitrate metabolic process, isocitrate dehydrogenase (NADP+) activity
Wa8730a010g002810	3.62008	4.3396	-1.03805	6.97832e-102	9.72917e-98	0.989	0.997	AT1G70410.2,AT1G23730.1	obsolete chloroplast part, negative regulation of stomatal complex development, cytosol
Wa8730a010g002940	1.76676	0.88163	1.27697	1.72737e-49	2.4083e-45	0.648	0.395	.	cytosolic large ribosomal subunit, maturation of LSU-rRNA from tricistronic rRNA transcript (SSU-rRNA, 5.8S rRNA, LSU-rRNA), ribosomal large subunit biogenesis
Wa8730a010g003960	0.979259	1.83391	-1.23299	1.87085e-65	2.60834e-61	0.398	0.719	.	obsolete cofactor catabolic process, pheophytinase activity, chlorophyll catabolic process
Wa8730a010g004180	0.010043	0.927038	-1.32294	8.49262e-65	1.18404e-60	0.003	0.269	AT1G67980.1,AT4G26220.1	caffeoyl-CoA O-methyltransferase activity, methylation, coumarin biosynthetic process
Wa8730a010g004190	0.512614	1.28551	-1.11505	8.96554e-36	1.24998e-31	0.098	0.341	AT1G67980.1,AT4G26220.1	caffeoyl-CoA O-methyltransferase activity, methylation, coumarin biosynthetic process
Wa8730a010g006670	1.2538	0.418838	1.20459	1.86695e-42	2.6029e-38	0.498	0.213	AT5G58420.1,AT5G07090.1,AT2G17360.1	cytosolic ribosome, cytosolic small ribosomal subunit, structural constituent of ribosome
Wa8730a011g000060	0.611019	1.46444	-1.23122	5.00936e-75	6.98405e-71	0.236	0.649	AT5G17670.1	0
Wa8730a011g000300	0.623243	1.53339	-1.31306	1.9346e-67	2.69722e-63	0.249	0.63	.	trans-zeatin O-beta-D-glucosyltransferase activity, quercetin 7-O-glucosyltransferase activity, quercetin 3-O-glucosyltransferase activity
Wa8730a011g001180	0.519201	1.66795	-1.65729	1.24612e-104	1.73734e-100	0.211	0.686	AT5G16650.1	Z disc, 0, sarcomere
Wa8730a011g001390	1.12954	0.257749	1.25773	2.76031e-47	3.84843e-43	0.423	0.109	AT1G32440.1,AT3G22960.1	drug metabolic process, multicellular organism reproduction, seed maturation
Wa8730a011g001670	0.264153	1.52968	-1.82577	1.16836e-100	1.62893e-96	0.091	0.546	AT1G32450.1,AT5G19640.1,AT1G22540.1	leaf senescence, potassium:proton antiporter activity, leaf development
Wa8730a011g004920	1.88599	1.02261	1.2456	8.51733e-48	1.18749e-43	0.67	0.441	AT4G30800.1	structural constituent of ribosome, translation, cytosolic small ribosomal subunit
Wa8730a011g005130	1.41643	0.627347	1.1384	2.54466e-38	3.54776e-34	0.548	0.294	AT1G74050.1	ribosome biogenesis, cytosolic large ribosomal subunit, obsolete cytosolic part
Wa8730a011g005590	1.26633	2.67575	-2.03336	1.81097e-116	2.52485e-112	0.326	0.798	AT5G57800.1	alkane biosynthetic process, nuclear outer membrane-endoplasmic reticulum membrane network, lipid metabolic process
Wa8730a011g005920	1.72423	0.767452	1.38033	5.54272e-54	7.72765e-50	0.633	0.341	.	cytosol, gene expression, cell wall
Wa8730a012g001720	1.87737	1.16265	1.03112	2.69489e-42	3.75721e-38	0.7	0.51	AT2G44060.1	0
Wa8730a012g003470	2.31808	0.65831	2.39454	2.28275e-95	3.18261e-91	0.647	0.183	AT3G14310.1,AT5G49180.1,AT1G53830.1,AT4G33220.1,AT5G20860.2,AT3G43270.1	negative regulation of catalytic activity, pectinesterase activity, pectinesterase inhibitor activity
Wa8730a012g004670	1.20668	2.1972	-1.42902	5.0623e-44	7.05786e-40	0.294	0.606	AT4G39980.1,AT1G22410.1,AT4G33510.1	aromatic amino acid family biosynthetic process, 3-deoxy-7-phosphoheptulonate synthase activity, chorismate biosynthetic process
Wa8730a012g004780	3.6214	2.82118	1.15447	4.08142e-110	5.69031e-106	0.957	0.907	AT4G39730.1,AT5G65158.1,AT2G22170.1	endomembrane system, obsolete plastid part, chloroplast thylakoid
Wa8730a012g005250	1.86937	0.967586	1.301	1.67482e-49	2.33504e-45	0.672	0.45	AT3G28900.1,AT1G26880.1	polysome, polysomal ribosome, cytosolic large ribosomal subunit
Wa8730a012g005270	0.0021407	0.942222	-1.35625	1.43191e-108	1.99637e-104	0.001	0.417	AT3G47500.1,AT1G26790.1,AT2G34140.1,AT1G29160.1	negative regulation of stem cell population maintenance, DNA-binding transcription factor activity, negative regulation of short-day photoperiodism, flowering
Wa8730a013g000620	1.06002	0.311298	1.08018	6.71296e-40	9.35921e-36	0.443	0.155	AT2G35410.1	obsolete intracellular part, chloroplast, obsolete cytoplasmic part
Wa8730a013g001150	2.19974	1.35892	1.21305	1.98173e-56	2.76293e-52	0.749	0.605	.	cellular response to drug, cellular response to antibiotic, nucleoside diphosphate kinase activity
Wa8730a013g002090	2.04876	1.32896	1.03845	1.77579e-41	2.47581e-37	0.716	0.573	AT2G36530.1	mitochondrial envelope, phosphopyruvate hydratase activity, copper ion binding
Wa8730a013g003010	0.507037	1.82009	-1.89434	4.08843e-129	5.70008e-125	0.199	0.728	.	0
Wa8730a013g004490	2.2549	2.95482	-1.00976	2.0125e-75	2.80583e-71	0.766	0.923	AT3G63080.1,AT1G63460.1,AT2G31570.1	cellular response to toxic substance, glutathione peroxidase activity, cellular oxidant detoxification
Wa8730a013g005830	2.06901	1.36011	1.02273	1.45683e-41	2.03111e-37	0.744	0.58	AT1G04410.1	aerobic respiration, obsolete oxidation-reduction process, L-malate dehydrogenase activity
Wa8730a014g000130	0.305359	1.06225	-1.09197	5.51802e-52	7.69322e-48	0.12	0.438	.	vitamin biosynthetic process, phylloquinone biosynthetic process, protein homotetramerization
Wa8730a014g001250	1.88749	1.00532	1.27271	3.51447e-47	4.89987e-43	0.672	0.464	AT3G02080.1,AT5G15520.1,AT5G61170.1	ribosome biogenesis, cytosolic small ribosomal subunit, ribosomal small subunit assembly
Wa8730a014g001420	1.80594	0.821627	1.42006	4.51153e-58	6.28997e-54	0.656	0.381	AT5G59240.1	maturation of SSU-rRNA from tricistronic rRNA transcript (SSU-rRNA, 5.8S rRNA, LSU-rRNA), ribosome assembly, chloroplast ribosome
Wa8730a014g001510	1.41074	0.600789	1.16851	4.86501e-40	6.78279e-36	0.544	0.278	.	translation, obsolete cytosolic part, structural constituent of ribosome
Wa8730a014g001620	1.9969	3.04431	-1.5111	5.03083e-66	7.01399e-62	0.463	0.795	.	ammonium ion metabolic process, sphingolipid delta-4 desaturase activity, sphingoid biosynthetic process
Wa8730a014g001630	2.11813	3.43674	-1.90236	3.43708e-89	4.79197e-85	0.572	0.851	.	ammonium ion metabolic process, sphingolipid delta-4 desaturase activity, sphingoid biosynthetic process
Wa8730a014g001930	1.03652	1.82005	-1.13039	1.03079e-42	1.43713e-38	0.369	0.645	AT1G06760.1,AT2G30620.1	mitochondrion, nucleolus, nuclear lumen
Wa8730a014g003740	1.42639	0.728581	1.00672	5.59947e-33	7.80678e-29	0.555	0.315	.	chloroplast thylakoid, 0, chloroplast
Wa8730a014g003780	1.68439	0.802239	1.27267	3.61021e-51	5.03335e-47	0.633	0.357	AT3G60245.1	cytosolic ribosome, cytosolic large ribosomal subunit, structural constituent of ribosome
Wa8730a014g004490	0.157054	0.869195	-1.0274	6.06555e-64	8.45659e-60	0.055	0.381	.
Wa8730a014g005310	1.18789	1.94997	-1.09946	5.8687e-33	8.18214e-29	0.32	0.59	AT4G10490.1,AT5G24530.1,AT4G25310.1,AT4G16770.1	defense response to oomycetes, flavone synthase activity, drug catabolic process
Wa8730a014g005440	0.647906	1.47985	-1.20024	2.05155e-70	2.86028e-66	0.259	0.652	.	photosystem II repair, chloroplast thylakoid membrane, response to cytokinin
Wa8730a014g007120	1.25344	0.370972	1.27313	8.10691e-45	1.13027e-40	0.482	0.181	.	polysome, polysomal ribosome, cytosolic large ribosomal subunit
Wa8730a014g007380	1.19713	0.24032	1.38038	1.97004e-59	2.74663e-55	0.461	0.109	AT2G20490.1	box H/ACA telomerase RNP complex, positive regulation of telomerase RNA localization to Cajal body, box H/ACA scaRNP complex
Wa8730a015g000050	0.582256	1.41448	-1.20064	1.09027e-67	1.52006e-63	0.249	0.623	AT5G58110.1,AT3G13040.1	positive regulation of transcription, DNA-templated, xylem development, phloem development
Wa8730a015g000150	2.06405	1.07758	1.42318	9.55799e-61	1.33257e-56	0.719	0.493	AT2G27720.1,AT5G40040.1	obsolete cytosolic part, polysomal ribosome, polysome
Wa8730a015g000950	0.608616	1.47082	-1.2439	6.08743e-53	8.48709e-49	0.217	0.553	AT5G57340.1	0
Wa8730a015g001540	0.820723	1.98327	-1.6772	2.76339e-101	3.85272e-97	0.333	0.751	AT4G30210.3	endoplasmic reticulum, NADPH-hemoprotein reductase activity, phenylpropanoid metabolic process
Wa8730a015g003300	1.18254	0.432524	1.08205	5.89751e-34	8.2223e-30	0.446	0.191	AT5G55220.1	obsolete chloroplast part, chloroplast envelope, chloroplast stroma
Wa8730a015g003450	1.12514	0.350227	1.11796	1.03575e-35	1.44405e-31	0.408	0.145	AT3G02740.1,AT5G10770.1,AT4G12920.1	systemic acquired resistance, 0, aspartic-type endopeptidase activity
Wa8730a015g003560	1.07207	1.9911	-1.32588	3.28757e-89	4.58353e-85	0.414	0.795	.	cellular response to calcium ion, regulation of stomatal closure, photomorphogenesis
Wa8730a015g004110	0.937059	0.163963	1.11534	1.5439e-39	2.1525e-35	0.342	0.079	AT5G56030.1,AT3G07770.1,AT2G04030.1	photomorphogenesis, obsolete vacuolar part, vacuolar membrane
Wa8730a015g004980	1.59083	2.3105	-1.03826	1.94492e-56	2.7116e-52	0.55	0.814	AT2G15490.3,AT1G24100.1,AT2G23250.1,AT4G34135.1	sinapate 1-glucosyltransferase activity, quercetin 7-O-glucosyltransferase activity, quercetin 3-O-glucosyltransferase activity
Wa8730a015g005150	0.825924	0.0818707	1.07344	1.0641e-42	1.48356e-38	0.298	0.034	.	wax biosynthetic process, long-chain-alcohol O-fatty-acyltransferase activity, diacylglycerol O-acyltransferase activity
Wa8730a015g005520	2.4623	3.15797	-1.00364	4.57167e-67	6.37382e-63	0.675	0.93	.	wax biosynthetic process, long-chain-alcohol O-fatty-acyltransferase activity, diacylglycerol O-acyltransferase activity
Wa8730a015g005880	1.18731	1.93534	-1.07919	6.78018e-41	9.45293e-37	0.359	0.656	AT2G24150.1	adiponectin-activated signaling pathway, negative regulation of abscisic acid-activated signaling pathway, response to sucrose
Wa8730a015g005990	1.53889	0.716524	1.18643	2.69271e-41	3.75418e-37	0.588	0.325	.	ribosomal small subunit biogenesis, ribosomal small subunit assembly, cytosolic small ribosomal subunit
Wa8730a016g000060	0.0895458	0.865783	-1.11987	7.99693e-57	1.11493e-52	0.032	0.307	AT1G26780.1,AT3G29020.1,AT1G69560.1,AT5G39700.1	regulation of transcription by RNA polymerase II, defense response to fungus, response to chitin
Wa8730a016g000320	1.69878	0.690046	1.45529	2.05511e-63	2.86524e-59	0.643	0.305	AT5G15200.1,AT5G39850.1	structural constituent of ribosome, cytosolic small ribosomal subunit, cytosolic ribosome
Wa8730a016g000550	1.39159	0.513698	1.26653	1.386e-45	1.93236e-41	0.534	0.235	.	0
Wa8730a016g000680	2.05081	1.2283	1.18663	9.13256e-49	1.27326e-44	0.734	0.53	AT5G64940.2,AT1G71810.1	regulation of response to reactive oxygen species, membrane lipid biosynthetic process, response to iron ion starvation
Wa8730a016g000960	2.02445	1.13981	1.27627	3.16621e-56	4.41434e-52	0.729	0.494	.	0
Wa8730a016g001100	1.12622	0.390098	1.062	2.20402e-21	3.07284e-17	0.369	0.183	AT1G21860.1,AT4G39830.1,AT5G09360.1	0, oxidoreductase activity, oxidizing metal ions, obsolete oxidation-reduction process
Wa8730a016g001110	1.46228	2.1711	-1.0226	2.79389e-47	3.89525e-43	0.512	0.778	AT1G36160.1	acetyl-CoA carboxylase activity, embryonic meristem development, fatty acid elongation
Wa8730a016g002540	1.64841	0.955124	1.0002	4.07365e-31	5.67948e-27	0.585	0.372	AT1G65820.1	0
Wa8730a016g003000	2.83696	4.41685	-2.2793	1.09929e-222	1.53262e-218	0.773	0.997	AT1G19440.1,AT1G68530.1,AT2G26640.1,AT1G71160.1,AT1G25450.1	fatty acid elongase activity, wax biosynthetic process, response to cold
Wa8730a016g003080	2.00259	1.0519	1.37156	6.43745e-65	8.9751e-61	0.715	0.415	AT4G02230.1,AT1G02780.1	cytosolic ribosome, cytosolic large ribosomal subunit, structural constituent of ribosome
Wa8730a016g003520	2.52421	1.28572	1.78676	5.79804e-91	8.08363e-87	0.808	0.529	AT3G17820.1,AT1G48470.1,AT5G16570.1,AT5G35630.1,AT5G37600.1,AT1G66200.1	copper ion binding, nitrate assimilation, glutamate-ammonia ligase activity
Wa8730a017g001210	1.41401	2.3366	-1.33103	3.53045e-91	4.92215e-87	0.547	0.844	.	root hair cell development, structural constituent of cytoskeleton, root hair elongation
Wa8730a017g001470	0.196752	0.967574	-1.11206	7.4794e-79	1.04278e-74	0.08	0.47	.	chloroplast envelope, chloroplast fission, protein homodimerization activity
Wa8730a017g002690	1.3947	0.691972	1.01383	2.52925e-29	3.52627e-25	0.535	0.318	AT2G18020.1,AT4G36130.1,AT3G51190.1	structural constituent of ribosome, cytoplasmic translation, cytosolic ribosome
Wa8730a017g002730	2.3218	3.0746	-1.08607	1.96445e-74	2.73884e-70	0.752	0.913	AT1G75600.1,AT1G13370.1	nucleosome assembly, chromatin assembly, chromatin
Wa8730a017g002780	1.27502	0.421844	1.23088	3.8639e-44	5.38705e-40	0.497	0.202	AT5G24510.1,AT1G01100.2,AT5G47700.1,AT4G00810.2	cytoplasmic translation, cytosolic ribosome, protein-containing complex binding
Wa8730a017g002860	1.4513	0.572768	1.26746	7.40801e-40	1.03282e-35	0.519	0.246	AT2G17480.1,AT2G39200.1,AT5G65970.1,AT4G02600.1,AT1G11310.1	multi-organism reproductive process, pollen tube reception, pollination
Wa8730a017g003730	1.70483	0.985376	1.03795	1.08554e-30	1.51345e-26	0.61	0.403	AT3G44890.1	plastid ribosome, plastid large ribosomal subunit, structural constituent of ribosome
Wa8730a017g003750	0.940693	0.195921	1.07448	4.53239e-40	6.31906e-36	0.374	0.099	AT1G26230.1,AT2G28000.1	chloroplast organization, chloroplast stroma, mitochondrion
Wa8730a017g004060	1.9465	0.922945	1.47668	4.61764e-66	6.43791e-62	0.694	0.418	AT1G69100.1,AT3G18490.1,AT1G62290.2,AT1G11910.1,AT4G04460.1	response to cytokinin, proteolysis, response to cadmium ion
Wa8730a017g004570	0.206441	0.949997	-1.07272	3.28785e-70	4.58391e-66	0.071	0.431	.	obsolete thylakoid part, plastoglobule, chloroplast thylakoid membrane
Wa8730a018g000370	1.69298	2.65127	-1.38252	2.02946e-97	2.82947e-93	0.643	0.891	AT5G02120.1	circadian rhythm, 0, response to high light intensity
Wa8730a018g002220	1.32113	2.25174	-1.34259	1.34599e-69	1.87658e-65	0.497	0.799	AT2G47485.1	Z disc, 0, sarcomere
Wa8730a018g002280	1.44196	0.726609	1.03203	8.81586e-27	1.22911e-22	0.513	0.288	AT3G62410.1,AT2G47400.1	negative regulation of reductive pentose-phosphate cycle, peptide cross-linking via L-cystine, cellular response to anoxia
Wa8730a018g002540	1.5661	0.758454	1.16519	1.79118e-42	2.49726e-38	0.594	0.345	.	cytoplasm, chloroplast mRNA modification, chloroplast organization
Wa8730a019g001770	1.79122	2.80046	-1.45603	2.3026e-92	3.21029e-88	0.602	0.883	.
Wa8730a019g001920	0.34221	1.06709	-1.04578	2.33307e-58	3.25276e-54	0.148	0.494	.	mitochondrion, metal ion binding, hydroxymethylglutaryl-CoA lyase activity
Wa8730a019g002070	1.85503	1.04567	1.16765	5.31417e-50	7.40902e-46	0.691	0.436	AT3G06700.1	cytoplasmic translation, cytosolic large ribosomal subunit, obsolete cytosolic part
Wa8730a019g003200	0.242949	0.936611	-1.00074	1.51785e-52	2.11619e-48	0.099	0.407	.	squalene synthase activity, farnesyl diphosphate metabolic process, farnesyl-diphosphate farnesyltransferase activity
Wa8730a020g002090	1.34309	2.35012	-1.45283	1.4363e-84	2.0025e-80	0.507	0.817	AT1G59730.1	oxidoreductase activity, acting on a sulfur group of donors, disulfide as acceptor, protein domain specific binding, enzyme activator activity
Wa8730a020g002990	2.80132	1.89577	1.30644	1.37058e-97	1.91087e-93	0.886	0.751	AT1G13440.1,AT1G16300.1,AT3G04120.1,AT1G79530.1	response to redox state, glyceraldehyde-3-phosphate dehydrogenase (NADP+) (non-phosphorylating) activity, copper ion binding
Wa8730a020g003200	0.67033	1.45868	-1.13734	5.76357e-58	8.03557e-54	0.258	0.609	.	chloroplast envelope, antiporter activity, cation transport
Wa8730a001g001940	1.86849	2.68523	-1.17831	2.00824e-91	2.79989e-87	0.659	0.911	AT2G13360.1	serine-glyoxylate transaminase activity, glycine biosynthetic process, by transamination of glyoxylate, photorespiration
Wa8730a001g003580	0.850141	2.30137	-2.09368	4.17243e-126	5.81721e-122	0.259	0.781	AT2G47800.1,AT3G62700.1,AT1G71330.1	stomatal movement, ATPase activity, plant-type vacuole
Wa8730a001g004620	1.00556	2.24994	-1.79526	1.19233e-130	1.66234e-126	0.368	0.848	AT3G56940.1	obsolete thylakoid part, chloroplast organization, obsolete oxidation-reduction process
Wa8730a001g006240	2.16903	0.752121	2.04416	1.29462e-107	1.80497e-103	0.732	0.265	.	0
Wa8730a001g006890	0.196448	1.08386	-1.28027	3.52525e-79	4.91491e-75	0.054	0.434	AT5G05580.1,AT2G29980.1,AT3G11170.1	unsaturated fatty acid biosynthetic process, plastid membrane, omega-3 fatty acid desaturase activity
Wa8730a001g008310	1.51414	2.5974	-1.56282	7.46248e-118	1.04042e-113	0.483	0.898	AT1G15820.1	obsolete cofactor binding, photosynthesis, light reaction, chlorophyll binding
Wa8730a001g010220	1.22486	0.33704	1.28085	7.76011e-52	1.08191e-47	0.469	0.138	AT1G80480.1,AT2G04620.2	zinc ion import across plasma membrane, zinc ion transmembrane transporter activity, regulation of sequestering of zinc ion
Wa8730a001g012410	1.51964	0.163938	1.95587	8.02261e-107	1.11851e-102	0.591	0.073	AT2G29630.1	thiamine biosynthetic process, ADP-ribose pyrophosphohydrolase activity, response to vitamin B1
Wa8730a001g012590	2.00467	0.675442	1.91767	1.7518e-103	2.44235e-99	0.73	0.33	.	chromatin binding, structural constituent of chromatin, chromatin
Wa8730a002g000180	0.0112156	0.734174	-1.04301	1.09354e-67	1.52461e-63	0.005	0.285	AT4G27360.1	0
Wa8730a002g004180	1.37857	0.392812	1.42215	5.71466e-56	7.96738e-52	0.51	0.166	AT2G17710.1	0
Wa8730a002g004740	1.49423	0.407171	1.56829	3.02055e-61	4.21126e-57	0.549	0.199	AT2G21130.1,AT2G16600.1,AT4G34870.1,AT4G38740.1,AT2G38730.1	de-etiolation, red, far-red light phototransduction, multivesicular body
Wa8730a002g004940	0.233727	2.03195	-2.59429	4.01815e-189	5.6021e-185	0.082	0.761	AT1G19920.1	sulfate adenylyltransferase (ATP) activity, cellular response to sulfate starvation, adenylylsulfate kinase activity
Wa8730a002g005400	0.355374	1.55359	-1.72865	2.53336e-130	3.53201e-126	0.104	0.662	AT1G32900.1	chloroplast starch grain, chloroplast, amyloplast
Wa8730a002g006080	0.847436	2.06354	-1.75446	1.46084e-123	2.0367e-119	0.325	0.799	AT3G19900.1	0
Wa8730a002g006600	1.27222	0.011641	1.81863	2.44591e-103	3.41009e-99	0.504	0.009	AT5G23240.1	cytoplasm, chloroplast, obsolete cytoplasmic part
Wa8730a002g007540	0.0417622	1.22749	-1.71064	3.65344e-135	5.09363e-131	0.024	0.543	AT5G23730.1,AT5G52250.1	nuclear body, regulation of stomatal movement, response to red light
Wa8730a002g007630	0.959232	2.41835	-2.10507	3.24766e-143	4.52789e-139	0.332	0.827	AT5G38630.1	protein domain specific binding, oxidoreductase activity, obsolete oxidation-reduction process
Wa8730a002g008040	1.11865	0.229337	1.283	1.60347e-54	2.23556e-50	0.453	0.115	AT2G37540.1	obsolete oxidation-reduction process, chloroplast inner membrane, chloroplast envelope
Wa8730a002g008180	1.19344	0.0719413	1.61798	6.81562e-84	9.50234e-80	0.464	0.03	.	polysaccharide binding, amylopectin binding, dephosphorylation
Wa8730a002g009390	0.107318	1.2235	-1.61031	1.74328e-131	2.43049e-127	0.033	0.557	AT3G24190.1	response to photooxidative stress, 0, regulation of tocopherol cyclase activity
Wa8730a002g009470	0.658376	1.74274	-1.5644	1.93051e-100	2.69152e-96	0.21	0.688	AT5G18930.1	spermidine biosynthetic process, drug metabolic process, adenosylmethionine decarboxylase activity
Wa8730a002g010430	3.35378	1.2583	3.02315	1.06561e-221	1.48568e-217	0.955	0.549	AT2G37220.1,AT5G04280.1	stromule, poly(U) RNA binding, cold acclimation
Wa8730a002g010730	0.410152	1.26621	-1.23503	7.34057e-90	1.02342e-85	0.126	0.585	AT5G60540.1	pyridoxine metabolic process, glutaminase complex, glutaminase activity
Wa8730a003g001430	4.62185	2.30995	3.33537	3.42827e-260	4.77969e-256	0.999	0.756	AT1G17640.1,AT2G21660.1	poly(U) RNA binding, stem cell development, stem cell differentiation
Wa8730a003g002280	0.998406	2.11064	-1.60461	2.80279e-112	3.90765e-108	0.413	0.817	AT5G67370.1	regulation of circadian rhythm, response to iron ion starvation, protein kinase CK2 complex
Wa8730a003g002890	1.44268	0.0604669	1.99411	2.54895e-105	3.55375e-101	0.543	0.034	AT3G29320.1	glycogen phosphorylase activity, pyridoxal phosphate binding, amyloplast
Wa8730a003g004150	0.0697436	1.58036	-2.17935	2.682e-180	3.73925e-176	0.015	0.662	AT5G19855.1	protein folding chaperone, chaperone-mediated protein folding, obsolete chloroplast part
Wa8730a003g004610	0.865227	0.136627	1.05115	3.02744e-43	4.22085e-39	0.347	0.066	.	response to endoplasmic reticulum stress, protein folding, protein disulfide isomerase activity
Wa8730a003g005640	1.34241	0.176777	1.68165	2.72292e-80	3.79629e-76	0.509	0.08	AT3G46860.1	0
Wa8730a003g006530	0.787755	2.19246	-2.02656	2.37224e-146	3.30737e-142	0.336	0.83	AT2G21970.1	chlorophyll binding, photosynthesis, light harvesting, photosynthesis, light reaction
Wa8730a003g006820	1.32709	0.536436	1.14067	1.31669e-38	1.83573e-34	0.522	0.249	.	selenium compound metabolic process, pyridoxal phosphate binding, drug binding
Wa8730a003g007690	0.890527	0.038634	1.22902	8.20284e-63	1.14364e-58	0.354	0.013	AT5G57360.1,AT1G68050.1	FKF1
Wa8730a004g000350	0.549531	2.67856	-3.07154	1.03367e-235	1.44115e-231	0.216	0.918	.	0
Wa8730a004g001510	1.50038	0.598796	1.30071	9.85853e-50	1.37448e-45	0.576	0.275	AT3G58610.3	obsolete cofactor binding, protein homodimerization activity, magnesium ion binding
Wa8730a004g002560	1.99501	1.24013	1.08907	1.31205e-37	1.82926e-33	0.663	0.448	.	protein transport to vacuole involved in ubiquitin-dependent protein catabolic process via the multivesicular body sorting pathway, response to salicylic acid, defense response to fungus
Wa8730a004g002900	2.16513	3.39307	-1.77155	7.08367e-178	9.87605e-174	0.775	0.984	AT4G33010.1,AT2G26080.1	glycine catabolic process, response to cadmium ion, apoplast
Wa8730a004g002990	0.538307	1.23345	-1.00288	8.45123e-47	1.17827e-42	0.225	0.527	.	0
Wa8730a004g003590	2.95413	3.76459	-1.16926	1.73949e-131	2.4252e-127	0.956	0.993	AT4G18360.1,AT3G14420.1	glycolate oxidase activity, peroxisome, hydrogen peroxide biosynthetic process
Wa8730a004g004230	0.305688	1.36867	-1.53356	1.17117e-104	1.63284e-100	0.102	0.585	AT5G17230.1	cytoplasm, chloroplast, obsolete cytoplasmic part
Wa8730a004g004780	0.0237826	1.64429	-2.3379	9.83239e-194	1.37083e-189	0.012	0.685	AT1G62190.1,AT4G27030.1	phosphatidylglycerol metabolic process, ubiquitin-dependent ERAD pathway, delta 3-trans-hexadecenoic acid phosphatidylglycerol desaturase activity
Wa8730a004g004970	0.558364	2.3447	-2.57713	1.72203e-186	2.40085e-182	0.163	0.834	AT5G54270.1,AT1G61520.1,AT3G27690.2,AT2G34430.1,AT1G29920.1	photosynthesis, photosynthesis, light reaction, chloroplast
Wa8730a004g006600	1.65206	0.151017	2.16555	6.58952e-123	9.18711e-119	0.636	0.07	AT1G19660.1,AT1G75380.2	sequence-specific DNA binding, nucleic acid phosphodiester bond hydrolysis, nuclease activity
Wa8730a004g007200	1.72119	0.027815	2.44303	3.19786e-125	4.45845e-121	0.587	0.016	AT1G06460.1	0
Wa8730a004g008480	1.26017	2.29799	-1.49725	7.28353e-31	1.01547e-26	0.269	0.513	AT3G24500.1	nucleolus, positive regulation of transcription, DNA-templated, transcription coactivator activity
Wa8730a005g000010	2.14107	0.825272	1.8983	7.99153e-111	1.11418e-106	0.786	0.397	AT3G15840.1	0
Wa8730a005g000140	2.18255	1.05743	1.62321	8.50614e-91	1.18593e-86	0.774	0.464	.	0
Wa8730a005g000500	1.63044	0.760089	1.25566	2.24549e-51	3.13066e-47	0.603	0.281	AT3G15630.1,AT1G52720.1	0
Wa8730a005g000760	0.325635	1.27971	-1.37643	1.42228e-79	1.98294e-75	0.154	0.557	AT4G32590.1,AT3G16250.1	0, NAD(P)H dehydrogenase complex (plastoquinone), photosynthetic electron transport in photosystem I
Wa8730a005g003350	1.39185	0.592479	1.15324	3.69388e-49	5.15001e-45	0.497	0.15	AT3G16120.1,AT1G52245.1	transport along microtubule, obsolete cell projection part, negative regulation of catalytic activity
Wa8730a005g003400	0.107565	0.915953	-1.16626	4.49326e-95	6.26451e-91	0.033	0.446	AT1G64100.1,AT5G25630.1,AT3G61520.1	RNA binding, nucleic acid phosphodiester bond hydrolysis, RNA modification
Wa8730a005g003990	0.401436	1.49339	-1.57536	1.07738e-81	1.50209e-77	0.171	0.58	AT1G64230.1,AT5G53300.4,AT4G27960.1,AT5G41700.5	cellular protein catabolic process, ubiquitin protein ligase binding, ubiquitin-dependent protein catabolic process
Wa8730a005g005910	1.24832	0.105297	1.64904	8.08516e-88	1.12723e-83	0.497	0.046	AT2G30970.1	L-aspartate:2-oxoglutarate aminotransferase activity, glutamate metabolic process, response to cadmium ion
Wa8730a005g006660	0.958024	0.0117351	1.36521	7.83785e-70	1.09275e-65	0.368	0.004	AT1G10657.2	0
Wa8730a005g006880	1.0905	0.168325	1.33041	2.1135e-49	2.94665e-45	0.383	0.072	AT1G69830.1,AT1G10760.1	starch catabolic process, alpha-glucan, water dikinase activity, response to symbiotic fungus
Wa8730a005g007220	0.707447	4.04043	-4.80848	1.04822e-294	1.46142e-290	0.174	0.991	AT1G29930.1,AT3G27690.2	obsolete thylakoid part, chloroplast envelope, plastoglobule
Wa8730a005g008840	0.782638	1.83346	-1.51601	4.68544e-83	6.53244e-79	0.318	0.699	.	0
Wa8730a005g008950	1.36952	0.620866	1.08008	1.74458e-31	2.4323e-27	0.518	0.278	.	0
Wa8730a006g000440	4.63018	0.905881	5.37303	3.69498e-265	5.15154e-261	0.991	0.328	AT5G54770.1	drug metabolic process, thiazole biosynthetic process, thiamine biosynthetic process
Wa8730a006g000900	1.52153	0.742546	1.12384	2.6589e-38	3.70704e-34	0.595	0.344	AT5G45680.1	thylakoid lumen, chaperone-mediated protein folding, peptidyl-prolyl cis-trans isomerase activity
Wa8730a006g002480	1.69458	2.52364	-1.19608	2.10938e-80	2.94089e-76	0.637	0.884	AT4G20360.2	chloroplast thylakoid membrane, nucleoid, apoplast
Wa8730a006g002560	0.500584	2.07515	-2.27162	2.28016e-171	3.17899e-167	0.182	0.812	AT4G13615.1,AT3G24100.1	0
Wa8730a006g003680	2.01778	0.12304	2.73353	2.54998e-165	3.55518e-161	0.735	0.047	AT5G13420.1	0
Wa8730a006g003890	1.30078	2.80914	-2.1761	1.90006e-179	2.64906e-175	0.473	0.927	.	cytosol, phosphatase activity, dephosphorylation
Wa8730a006g004690	1.18454	0.4693	1.03187	1.23607e-25	1.72332e-21	0.272	0.073	AT5G15230.1,AT3G02885.1,AT1G74670.1	cellular response to acid chemical, cellular response to gibberellin stimulus, gibberellic acid mediated signaling pathway
Wa8730a006g004860	0.0639757	1.03588	-1.40217	9.47273e-102	1.32069e-97	0.021	0.441	AT2G33270.1	chloroplast membrane, chloroplast, oxidoreductase activity, acting on a sulfur group of donors, disulfide as acceptor
Wa8730a006g005790	1.39807	2.71939	-1.90626	1.74209e-129	2.42883e-125	0.461	0.901	AT1G15820.1	pigment binding, photosynthesis, light harvesting in photosystem I, chlorophyll binding
Wa8730a006g005950	1.90042	0.786446	1.60713	7.30462e-85	1.01841e-80	0.713	0.347	.	peptidyl-prolyl cis-trans isomerase activity, protein peptidyl-prolyl isomerization, FK506 binding
Wa8730a006g005980	0.17008	1.50375	-1.92407	8.56327e-136	1.19389e-131	0.071	0.619	AT2G22240.1,AT5G10170.1	defense response to virus, reproduction, defense response to fungus
Wa8730a006g006550	0.24331	0.981471	-1.06494	4.05418e-71	5.65233e-67	0.094	0.468	AT1G68660.1	0, protein-macromolecule adaptor activity, positive regulation of proteolysis involved in cellular protein catabolic process
Wa8730a006g006940	2.23975	0.104317	3.08079	9.80936e-191	1.36762e-186	0.791	0.032	AT5G06690.1	thioredoxin-disulfide reductase activity, cellular response to toxic substance, protein disulfide oxidoreductase activity
Wa8730a007g000180	1.78896	0.639705	1.65803	1.39706e-80	1.94778e-76	0.681	0.315	AT5G04740.1	anther development, hydrogen peroxide mediated signaling pathway, response to molecule of bacterial origin
Wa8730a007g000290	2.01038	0.835661	1.69477	5.17195e-82	7.21074e-78	0.721	0.405	AT2G36160.1,AT3G11510.1,AT3G52580.1	cytosolic ribosome, ribosomal small subunit assembly, ribosomal small subunit biogenesis
Wa8730a007g001430	2.53873	4.3072	-2.55135	3.22271e-251	4.4931e-247	0.855	0.999	AT1G44575.1	chloroplast thylakoid, obsolete thylakoid part, chloroplast thylakoid membrane
Wa8730a007g001450	0.431987	1.64341	-1.74771	3.21122e-91	4.47709e-87	0.129	0.574	AT5G63160.1,AT3G48360.1	pollen development, sugar mediated signaling pathway, response to cold
Wa8730a007g002830	1.88662	2.83378	-1.36646	1.03618e-95	1.44465e-91	0.666	0.926	.	pigment binding, plastoglobule, chlorophyll binding
Wa8730a007g003750	2.1493	1.09468	1.52149	5.22346e-70	7.28255e-66	0.737	0.49	AT5G13330.1,AT2G33710.1,AT5G51190.1,AT5G61890.1	DNA-binding transcription factor activity, cellular response to freezing, sequence-specific DNA binding
Wa8730a007g004840	1.25837	0.251228	1.453	1.29477e-57	1.80517e-53	0.483	0.145	AT4G13530.2	0
Wa8730a007g005080	2.40126	3.52999	-1.62842	4.20393e-149	5.86113e-145	0.824	0.979	AT4G10340.1	chloroplast stroma, photosynthesis, light reaction, obsolete thylakoid part
Wa8730a007g005200	0.154293	1.4107	-1.81261	2.48542e-129	3.46518e-125	0.048	0.573	AT5G49740.1,AT1G23020.7	obsolete oxidation-reduction process, ferric-chelate reductase activity, response to light stimulus
Wa8730a007g006090	0.757703	1.89863	-1.646	2.82605e-105	3.94008e-101	0.298	0.759	AT4G09350.1	membrane protein complex, NAD(P)H dehydrogenase complex (plastoquinone), chloroplast thylakoid membrane
Wa8730a007g006370	0.561989	3.12243	-3.69394	3.07239e-262	4.28353e-258	0.192	0.947	.	glucose-1-phosphate guanylyltransferase (GDP) activity, mannose-1-phosphate guanylyltransferase (GDP) activity, galactose-1-phosphate guanylyltransferase (GDP) activity
Wa8730a007g008930	0.678033	2.00785	-1.91852	7.01053e-117	9.77408e-113	0.195	0.719	AT2G27820.1,AT1G08250.1,AT5G22630.1,AT3G44720.1	drug metabolic process, arogenate dehydratase activity, response to karrikin
Wa8730a008g000400	0.827011	0.0687191	1.09398	1.71244e-41	2.38748e-37	0.293	0.036	.	cellular amino acid biosynthetic process, L-threonine ammonia-lyase activity, isoleucine biosynthetic process
Wa8730a008g001830	2.40582	1.15997	1.79739	3.11621e-101	4.34462e-97	0.8	0.514	.	serine-type endopeptidase activity, mucilage extrusion from seed coat, mucilage metabolic process involved in seed coat development
Wa8730a008g001910	1.30772	0.403262	1.30486	4.95501e-48	6.90827e-44	0.5	0.191	AT4G34670.1	polysomal ribosome, polysome, nucleolus
Wa8730a008g003240	0.340155	1.47603	-1.63872	3.64468e-115	5.08142e-111	0.137	0.646	AT1G06690.1	chloroplast thylakoid membrane, obsolete thylakoid part, chloroplast thylakoid
Wa8730a008g003780	0.286607	3.00475	-3.92145	2.72559e-259	3.80002e-255	0.076	0.894	AT1G31260.1,AT4G19690.2,AT3G12750.1,AT2G32270.1,AT1G05300.1,AT2G30080.1,AT2G04032.1	cadmium ion transport, plasma membrane, zinc ion transmembrane transporter activity
Wa8730a008g003940	5.662	4.77895	1.27396	3.24914e-41	4.52995e-37	0.986	0.953	.	cytosolic small ribosomal subunit, protein neddylation, ethylene biosynthetic process
Wa8730a008g004320	0.592182	1.89044	-1.87299	5.35035e-123	7.45945e-119	0.195	0.723	AT4G21990.1,AT1G62180.2,AT4G04610.1	sulfate assimilation, phosphoadenylyl sulfate reduction by phosphoadenylyl-sulfate reductase (thioredoxin), obsolete oxidation-reduction process, obsolete plastid part
Wa8730a008g004400	1.98941	0.476351	2.18289	9.72331e-123	1.35562e-118	0.725	0.199	AT1G53680.1	glutathione binding, regulation of response to red or far red light, glutathione metabolic process
Wa8730a008g005250	1.00706	0.274783	1.05646	2.39003e-40	3.33217e-36	0.412	0.13	AT5G54800.1,AT1G61800.1	response to nematode, glucose-6-phosphate transport, triose phosphate transmembrane transport
Wa8730a009g000250	2.35864	1.08719	1.83431	3.00716e-105	4.19258e-101	0.789	0.493	.	0
Wa8730a009g000490	3.44984	5.03197	-2.28253	7.27277e-236	1.01397e-231	0.984	1	AT2G39730.1,AT5G59250.1	carbohydrate:proton symporter activity, ribulose-1,5-bisphosphate carboxylase/oxygenase activator activity, glucose import
Wa8730a009g000670	1.9343	3.194	-1.81735	1.1343e-157	1.58144e-153	0.678	0.973	AT3G54890.1,AT3G08940.2	response to red light, photosynthesis, light harvesting in photosystem I, obsolete cofactor binding
Wa8730a009g000760	2.06082	0.976682	1.56409	1.96342e-76	2.7374e-72	0.73	0.417	AT5G02960.1,AT3G09680.1	polysomal ribosome, cytosolic small ribosomal subunit, 0
Wa8730a009g001550	0.244922	2.8025	-3.6898	2.96636e-270	4.1357e-266	0.089	0.918	AT3G56290.1	0
Wa8730a009g002470	1.71161	0.778027	1.34687	4.84614e-53	6.75649e-49	0.631	0.351	AT5G27700.1,AT3G53890.1	cytosolic ribosome, cytosolic small ribosomal subunit, polysomal ribosome
Wa8730a009g003610	0.147164	0.847074	-1.00976	4.81706e-56	6.71594e-52	0.051	0.345	AT5G13630.1	magnesium chelatase complex, chloroplast inner membrane, chloroplast envelope
Wa8730a009g004850	2.31102	1.30521	1.45109	1.7168e-93	2.39356e-89	0.83	0.576	AT3G22960.1,AT5G28840.1	nucleotide catabolic process, nicotinamide nucleotide biosynthetic process, pyruvate biosynthetic process
Wa8730a009g005590	1.96128	0.819503	1.64723	1.75892e-78	2.45229e-74	0.702	0.364	AT1G27400.1	polysome, polysomal ribosome, cytosolic large ribosomal subunit
Wa8730a009g005910	1.90918	2.67256	-1.10133	4.97397e-62	6.93471e-58	0.598	0.867	AT5G54270.1	obsolete cofactor binding, obsolete thylakoid part, chlorophyll binding
Wa8730a009g006620	3.68342	0.99318	3.8812	6.28279e-236	8.75947e-232	0.956	0.36	AT2G14160.1,AT3G03920.1,AT4G39260.1,AT2G21660.1	alternative mRNA splicing, via spliceosome, cytidine to uridine editing, single-stranded DNA binding
Wa8730a009g006850	0.267408	1.02329	-1.09051	4.05758e-64	5.65708e-60	0.102	0.453	AT4G34350.1	isopentenyl diphosphate biosynthetic process, methylerythritol 4-phosphate pathway, isoprenoid biosynthetic process, 4-hydroxy-3-methylbut-2-en-1-yl diphosphate synthase activity
Wa8730a009g006980	1.37034	0.281292	1.57116	6.1843e-79	8.62215e-75	0.558	0.133	AT2G15890.1	pollen tube guidance, mediator complex binding, embryo development ending in seed dormancy
Wa8730a010g000090	1.80137	0.800188	1.4444	6.67234e-62	9.30257e-58	0.662	0.331	.	xenobiotic transmembrane transporter activity, nucleotide transmembrane transport, chloroplast membrane
Wa8730a010g000190	0.864873	0.043572	1.18489	2.02634e-56	2.82513e-52	0.345	0.026	.	GI
Wa8730a010g002310	0.3204	2.4879	-3.12705	9.32966e-234	1.30074e-229	0.126	0.875	AT5G42110.1	endocytosis, 0, regulation of endocytosis
Wa8730a010g003830	0.0710971	2.35139	-3.28977	4.91548e-231	6.85316e-227	0.03	0.795	.	chloroplast thylakoid, chloroplast thylakoid lumen, obsolete thylakoid part
Wa8730a010g004010	0.539176	1.42917	-1.28399	2.33446e-68	3.25471e-64	0.196	0.577	.	photoinhibition, stromule, chloroplast thylakoid membrane
Wa8730a010g004860	0.8971	1.65863	-1.09866	9.98045e-57	1.39147e-52	0.411	0.698	AT3G07700.1,AT5G24970.2	cellular response to oxidative stress, response to iron ion starvation, iron ion homeostasis
Wa8730a011g000010	0.294612	1.31873	-1.47749	4.14619e-98	5.78061e-94	0.098	0.559	.	regulation of tocopherol cyclase activity, positive regulation of carotenoid biosynthetic process, plastoglobule organization
Wa8730a011g000050	0.223121	1.23545	-1.46049	1.35666e-88	1.89145e-84	0.08	0.499	AT5G35970.1	DNA duplex unwinding, drug binding, ATP binding
Wa8730a011g001940	0.225709	1.69496	-2.11969	7.60717e-159	1.06059e-154	0.1	0.702	AT2G38740.1	dephosphorylation, 2-deoxyglucose-6-phosphatase activity, glucose-6-phosphatase activity
Wa8730a011g002510	0.174823	1.52679	-1.95048	4.42352e-152	6.16727e-148	0.048	0.64	AT5G52570.1	carotenoid metabolic process, xanthophyll biosynthetic process, 0
Wa8730a011g005650	1.6404	0.224403	2.04286	3.01041e-103	4.19711e-99	0.604	0.105	AT4G34200.1	obsolete plastid part, chloroplast stroma, obsolete chloroplast part
Wa8730a011g006020	1.72405	0.693375	1.48695	2.16084e-66	3.01264e-62	0.641	0.285	AT5G57290.1	polysomal ribosome, obsolete cytosolic part, structural constituent of ribosome
Wa8730a012g000050	3.26555	1.07399	3.16176	1.53321e-225	2.13761e-221	0.957	0.49	AT3G52930.1,AT2G36460.1	nicotinamide nucleotide biosynthetic process, drug metabolic process, obsolete coenzyme biosynthetic process
Wa8730a012g001170	1.16486	2.77726	-2.3262	3.96656e-110	5.53018e-106	0.275	0.775	AT1G77060.1,AT1G21440.1	obsolete plastid part, chloroplast stroma, obsolete chloroplast part
Wa8730a012g001820	2.1127	1.1222	1.42899	4.99167e-66	6.95939e-62	0.731	0.48	.	structural constituent of ribosome, large ribosomal subunit rRNA binding, cytosolic large ribosomal subunit
Wa8730a012g002080	2.61539	0.701233	2.76155	1.68949e-153	2.35548e-149	0.821	0.255	AT3G26740.1	obsolete thylakoid part, circadian rhythm, chloroplast thylakoid membrane protein complex
Wa8730a012g002730	1.70772	0.84677	1.24209	2.07163e-53	2.88827e-49	0.651	0.368	AT3G25070.1	response to molecule of bacterial origin, defense response to bacterium, extrinsic component of plasma membrane
Wa8730a012g004010	0.945037	2.14595	-1.73255	2.63299e-100	3.67091e-96	0.367	0.774	AT3G17800.1,AT1G48450.1	response to acid chemical, response to wounding, response to ozone
Wa8730a012g004550	1.04314	3.45367	-3.47766	9.62169e-248	1.34146e-243	0.309	0.96	AT4G24380.1,AT5G65400.2	0
Wa8730a012g005100	0.388008	1.26776	-1.26921	3.42734e-79	4.7784e-75	0.148	0.57	AT4G09670.1,AT1G34200.1	cytoplasm, cytosol, obsolete cytoplasmic part
Wa8730a012g005370	1.19552	2.37371	-1.69977	5.52505e-108	7.70302e-104	0.348	0.827	AT3G47470.1	chlorophyll binding, pigment binding, photosynthesis, light harvesting in photosystem I
Wa8730a013g001250	0.999878	0.109651	1.28433	2.16777e-50	3.02231e-46	0.329	0.03	.	0
Wa8730a013g002640	0.106429	1.15069	-1.50656	1.70629e-113	2.37891e-109	0.026	0.491	AT5G24470.1,AT2G46790.1	red or far-red light signaling pathway, negative regulation of transcription, DNA-templated, circadian rhythm
Wa8730a013g003980	2.34183	1.40462	1.35211	3.22272e-70	4.49312e-66	0.792	0.574	.	obsolete cytosolic part, cytosolic large ribosomal subunit, cytosolic ribosome
Wa8730a013g004290	1.06685	0.0217874	1.50771	2.41572e-82	3.368e-78	0.428	0.01	.	0
Wa8730a013g004860	1.78761	0.506728	1.84792	7.63447e-70	1.0644e-65	0.596	0.188	.	0
Wa8730a013g005640	1.78463	0.823606	1.38646	1.55064e-59	2.16191e-55	0.661	0.36	AT2G20450.1,AT4G27090.1	cytosolic ribosome, plasmodesma, cytosol
Wa8730a013g005650	1.75244	0.83108	1.32924	3.90669e-52	5.4467e-48	0.643	0.384	AT5G64140.1,AT5G03850.1,AT3G10090.1	intracellular anatomical structure, cytoplasm, obsolete intracellular part
Wa8730a014g000020	0.372806	1.54575	-1.6922	3.45092e-113	4.81127e-109	0.124	0.633	.	chlorophyll biosynthetic process, heme biosynthetic process, glutamyl-tRNA reductase activity
Wa8730a014g000240	1.73463	0.136529	2.30558	6.90888e-122	9.63236e-118	0.625	0.066	AT3G02360.1	pentose-phosphate shunt, phosphogluconate 2-dehydrogenase activity, pentose-phosphate shunt, oxidative branch
Wa8730a014g000250	0.768446	1.77987	-1.45918	2.09533e-91	2.92132e-87	0.329	0.741	AT2G14110.1	phosphatase activity, dephosphorylation, fructosamine metabolic process
Wa8730a014g001330	2.34518	0.584873	2.53959	2.59945e-126	3.62416e-122	0.74	0.203	AT1G69230.1,AT2G03680.1,AT1G26355.1,AT3G02180.1,AT5G15600.1	preprophase band, anisotropic cell growth, cortical microtubule, transverse to long axis
Wa8730a014g002390	0.540358	2.18541	-2.37331	9.16621e-182	1.27795e-177	0.204	0.837	AT3G63410.1	vitamin E biosynthetic process, chloroplast inner membrane, methylation
Wa8730a014g003560	0.33066	1.23312	-1.30197	3.15379e-82	4.39701e-78	0.125	0.544	AT1G32350.1,AT3G22370.1,AT5G64210.1	alternative respiration, mitochondria-nucleus signaling pathway, obsolete oxidation-reduction process
Wa8730a014g004390	1.86853	3.16729	-1.87371	1.9432e-166	2.70921e-162	0.67	0.954	AT2G16460.1,AT2G01140.1	pyruvate biosynthetic process, gluconeogenesis, ATP biosynthetic process
Wa8730a014g005170	0.607713	1.94845	-1.93427	4.67131e-123	6.51274e-119	0.24	0.741	.	photoinhibition, obsolete thylakoid part, photosynthesis, light harvesting
Wa8730a014g006200	2.28102	3.22959	-1.36849	3.25112e-139	4.53272e-135	0.809	0.956	AT4G35090.1,AT1G20630.1	obsolete cofactor catabolic process, response to hydrogen peroxide, cellular component biogenesis
Wa8730a015g001060	1.88647	1.04865	1.20872	1.51218e-34	2.10828e-30	0.626	0.463	AT4G30190.1,AT5G57350.1,AT2G18960.1,AT2G24520.2,AT2G07560.1,AT1G80660.1,AT1G17260.1	ATPase activity, energy coupled proton transmembrane transport, against electrochemical gradient, proton-exporting ATPase activity, phosphorylative mechanism
Wa8730a015g001410	0.943113	1.82085	-1.26631	3.01828e-75	4.20808e-71	0.355	0.738	AT4G28025.1	trehalose biosynthetic process, 0, trehalose metabolism in response to stress
Wa8730a015g001450	0.311313	2.06591	-2.53135	6.96081e-192	9.70476e-188	0.11	0.787	AT5G57660.1,AT2G24790.1,AT5G24930.1,AT3G21150.1	regulation of photomorphogenesis, regulation of flower development, red light signaling pathway
Wa8730a015g002060	1.12829	2.60534	-2.13094	3.43922e-173	4.79495e-169	0.415	0.91	AT2G24270.1	intracellular anatomical structure, cytoplasm, obsolete intracellular part
Wa8730a015g004220	1.47138	0.727878	1.07265	7.5324e-41	1.05017e-36	0.569	0.285	AT3G02360.1	fusion of sperm to egg plasma membrane involved in double fertilization forming a zygote and endosperm, double fertilization forming a zygote and endosperm, cytosol
Wa8730a015g004430	1.38983	0.260726	1.62895	6.90011e-82	9.62013e-78	0.555	0.116	AT1G70310.1,AT1G23820.1	spermidine synthase activity, ammonium ion metabolic process, spermidine biosynthetic process
Wa8730a015g005480	1.66309	0.868313	1.14662	6.9884e-40	9.74322e-36	0.636	0.398	AT4G36910.1,AT4G34120.1	obsolete cytoplasmic part, cell redox homeostasis, chloroplast
Wa8730a015g006080	1.92335	0.827144	1.58149	2.33413e-64	3.25424e-60	0.673	0.367	AT1G15690.1	0, pyrophosphate hydrolysis-driven proton transmembrane transporter activity, establishment or maintenance of transmembrane electrochemical gradient
Wa8730a016g000080	1.34083	2.8517	-2.17973	1.12175e-184	1.56394e-180	0.499	0.933	AT1G74470.1	geranylgeranyl reductase activity, obsolete cofactor metabolic process, phytyl diphosphate biosynthetic process
Wa8730a016g001120	2.08467	1.26158	1.18746	6.18635e-57	8.62501e-53	0.751	0.57	.	response to osmotic stress, 0, response to salt stress
Wa8730a016g003850	3.11409	2.07942	1.49271	7.0111e-106	9.77487e-102	0.905	0.689	AT2G02010.2,AT3G17760.2,AT5G17330.1,AT1G65960.2	response to cadmium ion, glutamate decarboxylase activity, calmodulin binding
Wa8730a016g004300	2.50622	0.264847	3.23361	9.81623e-177	1.36858e-172	0.8	0.133	AT1G02305.1,AT4G16190.1	cellular protein catabolic process, lysosome, immune response
Wa8730a017g000040	1.97052	0.0602198	2.75598	1.92721e-136	2.68692e-132	0.633	0.027	.	spermidine transmembrane transporter activity, spermidine transmembrane transport, putrescine transmembrane transporter activity
Wa8730a017g001020	0.444104	1.3796	-1.34964	3.96482e-54	5.52775e-50	0.137	0.458	AT1G01490.4	metal ion transport, 0, cellular transition metal ion homeostasis
Wa8730a017g001500	0.228535	1.33009	-1.58921	8.07987e-107	1.1265e-102	0.105	0.58	AT4G39030.1	salicylic acid biosynthetic process, response to nematode, antibiotic biosynthetic process
Wa8730a017g004030	0.236971	4.78228	-6.55749	0	0	0.065	0.997	.	response to UV-B, photoprotection, positive regulation of seed germination
Wa8730a018g001000	1.98772	0.923238	1.53573	1.49592e-70	2.08561e-66	0.71	0.41	AT5G60390.1,AT1G07930.1	GTPase activity, translation elongation factor activity, translational elongation
Wa8730a018g002360	2.18812	1.19107	1.43844	2.9629e-76	4.13087e-72	0.768	0.523	AT1G02830.1,AT5G27770.1,AT3G05560.1	cytosolic large ribosomal subunit, cytoplasmic translation, polysomal ribosome
Wa8730a018g003060	0.263902	1.0665	-1.1579	1.42696e-63	1.98947e-59	0.085	0.428	.	ammonium ion metabolic process, diacylglycerol cholinephosphotransferase activity, CDP-choline pathway
Wa8730a018g003640	0.0429901	1.47201	-2.06164	8.37393e-166	1.16749e-161	0.009	0.609	.	0
Wa8730a019g001460	1.73202	3.35086	-2.3355	6.80122e-184	9.48227e-180	0.485	0.944	AT2G30490.1,AT2G40890.1	trans-cinnamate 4-monooxygenase activity, p-coumarate 3-hydroxylase activity, coumarin biosynthetic process
Wa8730a019g002180	1.5778	0.776814	1.15558	4.61583e-43	6.43539e-39	0.606	0.351	AT3G05590.1,AT2G47570.1,AT5G27850.1	structural constituent of ribosome, obsolete cytosolic part, gene expression
Wa8730a019g003190	1.05433	0.191358	1.24501	7.72238e-55	1.07665e-50	0.426	0.09	.	obsolete thylakoid part, cytochrome b6f complex assembly, plastid thylakoid membrane
Wa8730a020g000640	0.428736	1.60792	-1.7012	1.49147e-125	2.0794e-121	0.164	0.701	AT5G04830.2	0
Wa8730a020g000810	0.144571	2.08912	-2.80539	3.52435e-125	4.91365e-121	0.036	0.536	AT3G52720.1,AT5G04180.1,AT1G08080.1,AT2G28210.1	0, response to anesthetic, response to carbon dioxide
Wa8730a020g001730	0.626416	2.52303	-2.73623	6.78719e-177	9.4627e-173	0.215	0.831	AT2G31560.1,AT2G43340.1	negative regulation of transcription, DNA-templated, 0, response to heat
Wa8730a020g001790	0.92312	0.0216967	1.30048	5.20635e-64	7.25869e-60	0.345	0.006	AT5G63420.1	5'-3' exonuclease activity, nucleic acid phosphodiester bond hydrolysis, chloroplast organization

## Sheet: SC B Dusk vs Dawn
Dataset S9. Differential Expressed Genes for Supercluster B in Dusk vs. Dawn
Genes significantly differentially expressed (log2FC>1 & p_val_adj <0.05) with PCT > 10% in either PCT1 or PCT2
PCT1: Percentage of cells within the Dusk Supercluster expressing the gene
PCT2: Percentage of cells outside the Dawn Supercluster expressing the gene
Gene	Dusk Expression	Dawn Expression	Ave. Log2 FC	p Value	Adj. p Value	PCT1	PCT2	Arabidopsis Orthologues	Arabidopsis Gene Description
Wa8730a017g004000	0.0456111	0.982724	-1.35197	2.54769e-64	3.55199e-60	0.022	0.374	AT1G29930.1,AT5G54270.1	chloroplast thylakoid membrane, pigment binding, chloroplast envelope
Wa8730a003g001800	0.0373735	0.89494	-1.23721	5.63692e-56	7.85899e-52	0.018	0.329	AT1G47740.1,AT4G31980.1	0
Wa8730a018g003210	0.643421	1.4815	-1.20909	9.68427e-54	1.35018e-49	0.251	0.617	AT4G15560.1	1-deoxy-D-xylulose-5-phosphate synthase activity, isopentenyl diphosphate biosynthetic process, methylerythritol 4-phosphate pathway, chlorophyll biosynthetic process
Wa8730a004g001010	0.181522	1.01052	-1.19599	1.12393e-47	1.56698e-43	0.052	0.357	.	carbohydrate transmembrane transport, triose-phosphate:phosphate antiporter activity, plastid inner membrane
Wa8730a011g005630	0.00344076	0.780539	-1.12112	8.79378e-60	1.22603e-55	0.003	0.316	AT2G24790.1,AT5G57660.1,AT5G24930.1	far-red light signaling pathway, regulation of flower development, red light signaling pathway
Wa8730a007g000810	0.193507	0.969322	-1.11926	5.50063e-54	7.66898e-50	0.057	0.397	AT1G44446.1	obsolete plastid part, chloroplast inner membrane, obsolete chloroplast part
Wa8730a005g007240	3.14149	3.91373	-1.11412	3.08176e-69	4.29658e-65	0.875	0.965	AT5G38430.1,AT1G67090.1	response to red light, ribulose bisphosphate carboxylase complex assembly, response to far red light
Wa8730a014g003370	0.516437	1.26927	-1.08611	1.41485e-40	1.97259e-36	0.198	0.504	AT5G46800.1,AT1G14560.1	mitochondrion, integral component of membrane, obsolete membrane part
Wa8730a003g002820	0.26975	1.01847	-1.08017	1.89204e-38	2.63789e-34	0.08	0.361	AT3G29240.2	0
Wa8730a002g005460	0.445476	1.18744	-1.07043	3.8279e-48	5.33686e-44	0.165	0.517	AT1G64720.1,AT5G54170.1	0
Wa8730a003g004270	1.41597	2.13712	-1.0404	6.0779e-38	8.47381e-34	0.495	0.747	AT4G02930.1	ribosome biogenesis, protein stabilization, rRNA processing
Wa8730a018g000050	2.11343	2.83426	-1.03994	2.9351e-55	4.09212e-51	0.721	0.895	.	0
Wa8730a011g005810	0.948481	1.65814	-1.02382	7.75271e-36	1.08088e-31	0.331	0.617	AT5G57345.1	0
Wa8730a017g000860	0.172291	0.874157	-1.01258	1.35534e-48	1.88961e-44	0.069	0.39	.	0
Wa8730a005g008430	2.55148	3.25195	-1.01056	1.46491e-42	2.04238e-38	0.762	0.902	AT5G38430.1,AT1G67090.1	response to red light, ribulose bisphosphate carboxylase complex assembly, response to far red light
Wa8730a004g006700	0.841879	1.53785	-1.00407	1.37862e-35	1.92207e-31	0.29	0.594	.	activation-induced cell death of T cells, cell aging, extrinsic component of plasma membrane
Wa8730a001g012340	0.851287	0.135603	1.03251	7.90748e-40	1.10246e-35	0.327	0.055	AT3G09050.1	0
Wa8730a015g005410	0.992193	0.266047	1.04761	1.8953e-31	2.64243e-27	0.358	0.107	AT2G22480.1	photosynthesis, carbohydrate phosphorylation, diphosphate-fructose-6-phosphate 1-phosphotransferase activity
Wa8730a019g001100	0.85064	0.118801	1.05582	2.8429e-41	3.96357e-37	0.327	0.051	AT2G38450.1,AT5G05360.1	0
Wa8730a010g004750	2.84575	2.01088	1.20446	3.49977e-09	4.87937e-05	0.366	0.241	AT1G10588.1,AT4G09600.1	cell redox homeostasis, extracellular region, plant-type cell wall
Wa8730a010g002220	2.75271	1.89582	1.23624	4.38701e-22	6.11637e-18	0.512	0.285	AT5G53880.1	vacuole, microtubule cytoskeleton, cortical microtubule organization
Wa8730a013g004500	1.64933	0.675889	1.40438	1.26629e-40	1.76546e-36	0.514	0.197	AT5G23860.1,AT5G44340.1,AT5G62700.1	structural constituent of cytoskeleton, tubulin complex, cytoskeleton
Wa8730a005g007220	1.6941	4.35483	-3.83862	9.1813e-229	1.28006e-224	0.478	0.996	AT1G29930.1,AT3G27690.2	obsolete thylakoid part, chloroplast envelope, plastoglobule
Wa8730a009g001550	0.39631	2.63466	-3.22925	4.8065e-180	6.70122e-176	0.128	0.847	AT3G56290.1	0
Wa8730a008g004320	0.819077	2.97861	-3.11554	8.87257e-157	1.23701e-152	0.281	0.871	AT4G21990.1,AT1G62180.2,AT4G04610.1	sulfate assimilation, phosphoadenylyl sulfate reduction by phosphoadenylyl-sulfate reductase (thioredoxin), obsolete oxidation-reduction process, obsolete plastid part
Wa8730a002g004940	0.59701	2.71204	-3.05135	3.17572e-165	4.4276e-161	0.195	0.848	AT1G19920.1	sulfate adenylyltransferase (ATP) activity, cellular response to sulfate starvation, adenylylsulfate kinase activity
Wa8730a017g004030	0.727592	2.70605	-2.85431	4.4031e-112	6.1388e-108	0.176	0.731	.	response to UV-B, photoprotection, positive regulation of seed germination
Wa8730a010g002310	0.367121	2.28866	-2.77219	7.77302e-153	1.08371e-148	0.12	0.783	AT5G42110.1	endocytosis, 0, regulation of endocytosis
Wa8730a004g004970	1.58651	3.34899	-2.54271	3.94082e-116	5.49429e-112	0.473	0.868	AT5G54270.1,AT1G61520.1,AT3G27690.2,AT2G34430.1,AT1G29920.1	photosynthesis, photosynthesis, light reaction, chloroplast
Wa8730a012g001170	1.5868	3.28581	-2.45116	9.08156e-93	1.26615e-88	0.346	0.779	AT1G77060.1,AT1G21440.1	obsolete plastid part, chloroplast stroma, obsolete chloroplast part
Wa8730a004g004780	0.0476021	1.64872	-2.30993	1.46389e-136	2.04096e-132	0.022	0.643	AT1G62190.1,AT4G27030.1	phosphatidylglycerol metabolic process, ubiquitin-dependent ERAD pathway, delta 3-trans-hexadecenoic acid phosphatidylglycerol desaturase activity
Wa8730a007g006370	1.15627	2.73211	-2.27346	4.99253e-137	6.96058e-133	0.399	0.887	.	glucose-1-phosphate guanylyltransferase (GDP) activity, mannose-1-phosphate guanylyltransferase (GDP) activity, galactose-1-phosphate guanylyltransferase (GDP) activity
Wa8730a004g000350	0.847416	2.40854	-2.25223	3.42774e-115	4.77896e-111	0.323	0.793	.	0
Wa8730a014g000020	0.659244	2.19981	-2.22256	1.59262e-117	2.22044e-113	0.24	0.762	.	chlorophyll biosynthetic process, heme biosynthetic process, glutamyl-tRNA reductase activity
Wa8730a001g004620	1.5922	3.09942	-2.17445	2.26842e-139	3.16263e-135	0.561	0.903	AT3G56940.1	obsolete thylakoid part, chloroplast organization, obsolete oxidation-reduction process
Wa8730a002g007210	0.611756	2.10298	-2.15138	1.95624e-51	2.72739e-47	0.154	0.494	AT1G03630.2,AT4G27440.1,AT5G54190.1	chloroplast, skotomorphogenesis, obsolete plastid part
Wa8730a011g002740	0.197191	1.6701	-2.12496	3.18787e-80	4.44452e-76	0.042	0.48	.	0
Wa8730a011g002510	0.344863	1.77913	-2.0692	2.57602e-108	3.59148e-104	0.113	0.662	AT5G52570.1	carotenoid metabolic process, xanthophyll biosynthetic process, 0
Wa8730a008g003780	0.093859	1.51039	-2.04362	7.6272e-86	1.06338e-81	0.018	0.461	AT1G31260.1,AT4G19690.2,AT3G12750.1,AT2G32270.1,AT1G05300.1,AT2G30080.1,AT2G04032.1	cadmium ion transport, plasma membrane, zinc ion transmembrane transporter activity
Wa8730a012g005370	2.46264	3.87913	-2.04357	4.77443e-98	6.65651e-94	0.779	0.938	AT3G47470.1	chlorophyll binding, pigment binding, photosynthesis, light harvesting in photosystem I
Wa8730a020g001730	0.191271	1.60716	-2.0427	4.34431e-71	6.05684e-67	0.084	0.49	AT2G31560.1,AT2G43340.1	negative regulation of transcription, DNA-templated, 0, response to heat
Wa8730a015g002060	0.291634	1.68644	-2.01227	3.04624e-109	4.24707e-105	0.11	0.659	AT2G24270.1	intracellular anatomical structure, cytoplasm, obsolete intracellular part
Wa8730a003g004150	0.137955	1.5113	-1.98131	5.86639e-103	8.17892e-99	0.044	0.565	AT5G19855.1	protein folding chaperone, chaperone-mediated protein folding, obsolete chloroplast part
Wa8730a014g002390	0.735472	2.10296	-1.97287	2.59842e-107	3.62272e-103	0.292	0.773	AT3G63410.1	vitamin E biosynthetic process, chloroplast inner membrane, methylation
Wa8730a017g003930	0.303457	1.66609	-1.96586	1.13477e-82	1.58209e-78	0.095	0.556	AT1G29930.1,AT5G54270.1	chloroplast thylakoid membrane, pigment binding, chloroplast envelope
Wa8730a007g001430	2.96013	4.26792	-1.88675	2.26799e-181	3.16203e-177	0.898	0.993	AT1G44575.1	chloroplast thylakoid, obsolete thylakoid part, chloroplast thylakoid membrane
Wa8730a002g009390	0.159802	1.46609	-1.88457	2.01448e-108	2.80858e-104	0.038	0.581	AT3G24190.1	response to photooxidative stress, 0, regulation of tocopherol cyclase activity
Wa8730a002g010730	0.800253	2.07619	-1.84079	4.16447e-85	5.80611e-81	0.312	0.731	AT5G60540.1	pyridoxine metabolic process, glutaminase complex, glutaminase activity
Wa8730a006g005790	2.61105	3.83142	-1.76062	1.02695e-93	1.43177e-89	0.762	0.947	AT1G15820.1	pigment binding, photosynthesis, light harvesting in photosystem I, chlorophyll binding
Wa8730a005g003990	0.825419	2.03887	-1.75064	1.77621e-77	2.4764e-73	0.308	0.715	AT1G64230.1,AT5G53300.4,AT4G27960.1,AT5G41700.5	cellular protein catabolic process, ubiquitin protein ligase binding, ubiquitin-dependent protein catabolic process
Wa8730a016g000080	1.91123	3.11804	-1.74105	4.07417e-125	5.68021e-121	0.646	0.915	AT1G74470.1	geranylgeranyl reductase activity, obsolete cofactor metabolic process, phytyl diphosphate biosynthetic process
Wa8730a007g006090	0.757631	1.95037	-1.72076	2.32948e-89	3.24777e-85	0.27	0.728	AT4G09350.1	membrane protein complex, NAD(P)H dehydrogenase complex (plastoquinone), chloroplast thylakoid membrane
Wa8730a005g000760	0.350234	1.5394	-1.71561	1.83805e-91	2.5626e-87	0.12	0.618	AT4G32590.1,AT3G16250.1	0, NAD(P)H dehydrogenase complex (plastoquinone), photosynthetic electron transport in photosystem I
Wa8730a018g003640	0.00104376	1.18487	-1.7079	2.54051e-99	3.54198e-95	0.001	0.481	.	0
Wa8730a012g004010	0.919998	2.10319	-1.70698	3.38569e-84	4.72033e-80	0.316	0.746	AT3G17800.1,AT1G48450.1	response to acid chemical, response to wounding, response to ozone
Wa8730a002g000180	0.045539	1.22001	-1.6944	2.09743e-72	2.92423e-68	0.012	0.392	AT4G27360.1	0
Wa8730a015g000810	1.23993	2.41303	-1.69242	1.26038e-58	1.75722e-54	0.351	0.704	AT4G30290.1,AT5G57550.1,AT2G18800.1,AT4G25820.1,AT5G48070.1	response to brassinosteroid, xyloglucan:xyloglucosyl transferase activity, response to mechanical stimulus
Wa8730a006g004860	0.0877201	1.25424	-1.68294	2.99097e-78	4.17001e-74	0.022	0.438	AT2G33270.1	chloroplast membrane, chloroplast, oxidoreductase activity, acting on a sulfur group of donors, disulfide as acceptor
Wa8730a011g000010	0.645058	1.78248	-1.64095	4.4733e-73	6.23667e-69	0.229	0.658	.	regulation of tocopherol cyclase activity, positive regulation of carotenoid biosynthetic process, plastoglobule organization
Wa8730a007g005200	0.161558	1.26136	-1.58667	2.2964e-74	3.20164e-70	0.053	0.475	AT5G49740.1,AT1G23020.7	obsolete oxidation-reduction process, ferric-chelate reductase activity, response to light stimulus
Wa8730a006g003890	2.00664	3.10427	-1.58354	1.06021e-112	1.47814e-108	0.684	0.919	.	cytosol, phosphatase activity, dephosphorylation
Wa8730a004g004230	0.586874	1.67596	-1.57122	3.75587e-60	5.23643e-56	0.237	0.608	AT5G17230.1	cytoplasm, chloroplast, obsolete cytoplasmic part
Wa8730a012g004920	0.331959	1.39171	-1.5289	1.27121e-42	1.77232e-38	0.119	0.428	AT4G33500.1	cytoplasm, chloroplast, obsolete cytoplasmic part
Wa8730a009g003610	0.668118	1.7242	-1.5236	2.29988e-56	3.20649e-52	0.218	0.592	AT5G13630.1	magnesium chelatase complex, chloroplast inner membrane, chloroplast envelope
Wa8730a015g001410	0.787723	1.83593	-1.51225	7.41504e-68	1.03381e-63	0.275	0.672	AT4G28025.1	trehalose biosynthetic process, 0, trehalose metabolism in response to stress
Wa8730a012g004550	0.265366	1.3131	-1.51155	4.72003e-74	6.58067e-70	0.079	0.519	AT4G24380.1,AT5G65400.2	0
Wa8730a009g000670	3.13261	4.17564	-1.50476	3.68279e-103	5.13455e-99	0.907	0.971	AT3G54890.1,AT3G08940.2	response to red light, photosynthesis, light harvesting in photosystem I, obsolete cofactor binding
Wa8730a002g006080	1.03213	2.07164	-1.4997	2.35295e-55	3.28048e-51	0.383	0.711	AT3G19900.1	0
Wa8730a003g002280	1.20292	2.22618	-1.47624	1.03333e-57	1.44066e-53	0.452	0.75	AT5G67370.1	regulation of circadian rhythm, response to iron ion starvation, protein kinase CK2 complex
Wa8730a014g003560	0.31073	1.31641	-1.45089	2.37192e-73	3.30692e-69	0.084	0.519	AT1G32350.1,AT3G22370.1,AT5G64210.1	alternative respiration, mitochondria-nucleus signaling pathway, obsolete oxidation-reduction process
Wa8730a007g002830	2.96911	3.97429	-1.45018	1.52099e-82	2.12057e-78	0.869	0.958	.	pigment binding, plastoglobule, chlorophyll binding
Wa8730a014g005170	0.770167	1.76579	-1.43638	2.24906e-63	3.13563e-59	0.304	0.681	.	photoinhibition, obsolete thylakoid part, photosynthesis, light harvesting
Wa8730a007g001450	0.38417	1.36357	-1.41298	1.38317e-65	1.92841e-61	0.091	0.509	AT5G63160.1,AT3G48360.1	pollen development, sugar mediated signaling pathway, response to cold
Wa8730a010g003830	0.246927	1.2229	-1.40804	6.79678e-53	9.47608e-49	0.071	0.412	.	chloroplast thylakoid, chloroplast thylakoid lumen, obsolete thylakoid part
Wa8730a006g002560	0.328786	1.28113	-1.37394	1.41734e-64	1.97606e-60	0.104	0.51	AT4G13615.1,AT3G24100.1	0
Wa8730a010g005400	0.364852	1.27593	-1.31441	3.13854e-63	4.37575e-59	0.113	0.523	AT3G12120.1	nuclear outer membrane-endoplasmic reticulum membrane network, endoplasmic reticulum subcompartment, obsolete endoplasmic reticulum part
Wa8730a018g000010	0.0531171	0.961608	-1.31067	3.11935e-58	4.349e-54	0.018	0.342	AT5G58770.1	plastid membrane organization, rubber cis-polyprenylcistransferase activity, polyprenol biosynthetic process
Wa8730a006g006550	0.305515	1.20635	-1.29963	7.79425e-65	1.08667e-60	0.112	0.52	AT1G68660.1	0, protein-macromolecule adaptor activity, positive regulation of proteolysis involved in cellular protein catabolic process
Wa8730a013g002640	0.0353967	0.929506	-1.28993	7.01468e-63	9.77987e-59	0.012	0.351	AT5G24470.1,AT2G46790.1	red or far-red light signaling pathway, negative regulation of transcription, DNA-templated, circadian rhythm
Wa8730a012g000060	0.770158	1.65954	-1.2831	4.57111e-54	6.37304e-50	0.296	0.65	AT1G43800.1,AT3G02630.1	fatty acid homeostasis, chloroplast, acyl-[acyl-carrier-protein] desaturase activity
Wa8730a015g001450	0.0951354	0.970489	-1.26287	1.13711e-73	1.58536e-69	0.031	0.436	AT5G57660.1,AT2G24790.1,AT5G24930.1,AT3G21150.1	regulation of photomorphogenesis, regulation of flower development, red light signaling pathway
Wa8730a006g002480	2.08333	2.94957	-1.24971	5.73855e-82	8.00068e-78	0.7	0.902	AT4G20360.2	chloroplast thylakoid membrane, nucleoid, apoplast
Wa8730a001g006890	0.353324	1.20799	-1.23303	1.32696e-43	1.85005e-39	0.117	0.432	AT5G05580.1,AT2G29980.1,AT3G11170.1	unsaturated fatty acid biosynthetic process, plastid membrane, omega-3 fatty acid desaturase activity
Wa8730a006g005980	0.185978	1.02163	-1.20559	1.05658e-55	1.47309e-51	0.054	0.4	AT2G22240.1,AT5G10170.1	defense response to virus, reproduction, defense response to fungus
Wa8730a007g008930	0.375404	1.20282	-1.19371	8.80138e-47	1.22709e-42	0.14	0.477	AT2G27820.1,AT1G08250.1,AT5G22630.1,AT3G44720.1	drug metabolic process, arogenate dehydratase activity, response to karrikin
Wa8730a010g004860	0.577118	1.39389	-1.17836	3.45249e-43	4.81346e-39	0.217	0.548	AT3G07700.1,AT5G24970.2	cellular response to oxidative stress, response to iron ion starvation, iron ion homeostasis
Wa8730a014g004390	2.48921	3.28418	-1.14689	4.32016e-78	6.02317e-74	0.831	0.929	AT2G16460.1,AT2G01140.1	pyruvate biosynthetic process, gluconeogenesis, ATP biosynthetic process
Wa8730a009g006850	0.400604	1.19092	-1.14018	5.31321e-52	7.40768e-48	0.138	0.5	AT4G34350.1	isopentenyl diphosphate biosynthetic process, methylerythritol 4-phosphate pathway, isoprenoid biosynthetic process, 4-hydroxy-3-methylbut-2-en-1-yl diphosphate synthase activity
Wa8730a001g000320	0.0530048	0.8289	-1.11938	2.13954e-61	2.98295e-57	0.011	0.345	.	cytosol, calcium ion binding, hyperosmotic salinity response
Wa8730a011g001940	0.183325	0.94906	-1.10472	6.16408e-57	8.59396e-53	0.041	0.383	AT2G38740.1	dephosphorylation, 2-deoxyglucose-6-phosphatase activity, glucose-6-phosphatase activity
Wa8730a017g001500	0.184921	0.936587	-1.08443	3.00759e-58	4.19318e-54	0.056	0.418	AT4G39030.1	salicylic acid biosynthetic process, response to nematode, antibiotic biosynthetic process
Wa8730a011g000050	0.268575	1.01453	-1.07618	2.0983e-39	2.92545e-35	0.101	0.39	AT5G35970.1	DNA duplex unwinding, drug binding, ATP binding
Wa8730a007g005080	3.69234	4.43824	-1.0761	2.32696e-96	3.24424e-92	0.966	0.99	AT4G10340.1	chloroplast stroma, photosynthesis, light reaction, obsolete thylakoid part
Wa8730a019g001460	0.543605	1.28155	-1.06463	4.45799e-48	6.21533e-44	0.109	0.461	AT2G30490.1,AT2G40890.1	trans-cinnamate 4-monooxygenase activity, p-coumarate 3-hydroxylase activity, coumarin biosynthetic process
Wa8730a020g000640	0.468168	1.19272	-1.04531	9.19801e-43	1.28239e-38	0.184	0.51	AT5G04830.2	0
Wa8730a008g003240	0.350275	1.07065	-1.03929	1.14108e-42	1.59089e-38	0.14	0.46	AT1G06690.1	chloroplast thylakoid membrane, obsolete thylakoid part, chloroplast thylakoid
Wa8730a009g000490	4.69077	5.40503	-1.03047	1.51408e-110	2.11094e-106	0.997	1	AT2G39730.1,AT5G59250.1	carbohydrate:proton symporter activity, ribulose-1,5-bisphosphate carboxylase/oxygenase activator activity, glucose import
Wa8730a017g001020	1.32411	2.02893	-1.01685	5.99152e-31	8.35338e-27	0.388	0.669	AT1G01490.4	metal ion transport, 0, cellular transition metal ion homeostasis
Wa8730a008g005250	1.07361	0.379939	1.00075	1.75262e-30	2.4435e-26	0.384	0.124	AT5G54800.1,AT1G61800.1	response to nematode, glucose-6-phosphate transport, triose phosphate transmembrane transport
Wa8730a009g002470	1.43564	0.74179	1.00102	1.0236e-21	1.4271e-17	0.482	0.269	AT5G27700.1,AT3G53890.1	cytosolic ribosome, cytosolic small ribosomal subunit, polysomal ribosome
Wa8730a009g000250	1.59403	0.896011	1.00702	1.44563e-34	2.0155e-30	0.617	0.35	.	0
Wa8730a013g001250	1.45379	0.75491	1.00826	8.58514e-31	1.19694e-26	0.497	0.214	.	0
Wa8730a003g006820	1.82194	1.12253	1.00904	4.59069e-34	6.40034e-30	0.654	0.392	.	selenium compound metabolic process, pyridoxal phosphate binding, drug binding
Wa8730a009g000760	1.75318	1.05083	1.01329	5.19173e-27	7.2383e-23	0.589	0.351	AT5G02960.1,AT3G09680.1	polysomal ribosome, cytosolic small ribosomal subunit, 0
Wa8730a003g007690	0.714375	0.0111797	1.0145	1.38421e-41	1.92986e-37	0.252	0.009	AT5G57360.1,AT1G68050.1	nucleus, positive regulation of flower development, circadian rhythm
Wa8730a016g001120	1.79862	1.09134	1.0204	1.9908e-32	2.77558e-28	0.653	0.428	.	response to osmotic stress, 0, response to salt stress
Wa8730a008g001910	1.26359	0.554652	1.02278	1.23915e-25	1.72763e-21	0.432	0.191	AT4G34670.1	polysomal ribosome, polysome, nucleolus
Wa8730a018g001000	1.69447	0.984013	1.02498	1.27793e-26	1.7817e-22	0.559	0.328	AT5G60390.1,AT1G07930.1	GTPase activity, translation elongation factor activity, translational elongation
Wa8730a015g006080	1.98956	1.27185	1.03544	4.13243e-25	5.76144e-21	0.644	0.419	AT1G15690.1	0, pyrophosphate hydrolysis-driven proton transmembrane transporter activity, establishment or maintenance of transmembrane electrochemical gradient
Wa8730a010g000090	2.00845	1.28805	1.03933	2.15225e-33	3.00067e-29	0.659	0.39	.	xenobiotic transmembrane transporter activity, nucleotide transmembrane transport, chloroplast membrane
Wa8730a019g002180	1.41845	0.694488	1.04446	7.90917e-25	1.1027e-20	0.507	0.288	AT3G05590.1,AT2G47570.1,AT5G27850.1	structural constituent of ribosome, obsolete cytosolic part, gene expression
Wa8730a013g003980	2.05061	1.32532	1.04637	3.35137e-31	4.67248e-27	0.691	0.461	.	obsolete cytosolic part, cytosolic large ribosomal subunit, cytosolic ribosome
Wa8730a005g006660	0.730753	0	1.05425	4.53163e-53	6.318e-49	0.292	0	AT1G10657.2	0
Wa8730a015g001060	1.3928	0.660941	1.05585	6.43475e-24	8.97132e-20	0.366	0.143	AT4G30190.1,AT5G57350.1,AT2G18960.1,AT2G24520.2,AT2G07560.1,AT1G80660.1,AT1G17260.1	ATPase activity, energy coupled proton transmembrane transport, against electrochemical gradient, proton-exporting ATPase activity, phosphorylative mechanism
Wa8730a011g006020	1.63342	0.899202	1.05925	1.58728e-21	2.21299e-17	0.495	0.285	AT5G57290.1	polysomal ribosome, obsolete cytosolic part, structural constituent of ribosome
Wa8730a013g005640	1.51414	0.778947	1.06066	2.06931e-22	2.88503e-18	0.492	0.275	AT2G20450.1,AT4G27090.1	cytosolic ribosome, plasmodesma, cytosol
Wa8730a007g000180	1.95913	1.21946	1.06712	6.44914e-40	8.9914e-36	0.706	0.526	AT5G04740.1	anther development, hydrogen peroxide mediated signaling pathway, response to molecule of bacterial origin
Wa8730a005g000140	2.34717	1.59768	1.08129	2.88421e-44	4.02117e-40	0.774	0.594	.	0
Wa8730a009g005590	1.76816	1.00667	1.09859	2.1762e-25	3.03405e-21	0.568	0.341	AT1G27400.1	polysome, polysomal ribosome, cytosolic large ribosomal subunit
Wa8730a007g000290	1.71953	0.948706	1.11207	2.56624e-35	3.57785e-31	0.604	0.338	AT2G36160.1,AT3G11510.1,AT3G52580.1	cytosolic ribosome, ribosomal small subunit assembly, ribosomal small subunit biogenesis
Wa8730a015g004220	1.52624	0.733333	1.14392	1.55072e-43	2.16201e-39	0.553	0.205	AT3G02360.1	fusion of sperm to egg plasma membrane involved in double fertilization forming a zygote and endosperm, double fertilization forming a zygote and endosperm, cytosol
Wa8730a002g008040	0.966079	0.172489	1.14491	9.5338e-41	1.3292e-36	0.358	0.074	AT2G37540.1	obsolete oxidation-reduction process, chloroplast inner membrane, chloroplast envelope
Wa8730a005g003350	1.24364	0.426214	1.17929	1.64402e-38	2.29209e-34	0.414	0.111	AT3G16120.1,AT1G52245.1	transport along microtubule, obsolete cell projection part, negative regulation of catalytic activity
Wa8730a020g001790	0.889978	0.0617293	1.19491	1.15654e-45	1.61245e-41	0.309	0.027	AT5G63420.1	5'-3' exonuclease activity, nucleic acid phosphodiester bond hydrolysis, chloroplast organization
Wa8730a019g003190	1.27266	0.438307	1.20372	8.56644e-44	1.19433e-39	0.488	0.166	.	obsolete thylakoid part, cytochrome b6f complex assembly, plastid thylakoid membrane
Wa8730a007g004840	1.16871	0.330977	1.20859	2.3053e-45	3.21405e-41	0.444	0.12	AT4G13530.2	0
Wa8730a004g002560	1.39366	0.543529	1.22648	1.13911e-36	1.58815e-32	0.47	0.179	.	protein transport to vacuole involved in ubiquitin-dependent protein catabolic process via the multivesicular body sorting pathway, response to salicylic acid, defense response to fungus
Wa8730a012g001820	1.8705	1.00777	1.24466	1.43518e-37	2.00093e-33	0.635	0.361	.	structural constituent of ribosome, large ribosomal subunit rRNA binding, cytosolic large ribosomal subunit
Wa8730a001g012410	1.74621	0.879742	1.25005	1.68881e-43	2.35453e-39	0.625	0.327	AT2G29630.1	thiamine biosynthetic process, ADP-ribose pyrophosphohydrolase activity, response to vitamin B1
Wa8730a016g003850	1.50592	0.608308	1.29498	9.32742e-28	1.30043e-23	0.435	0.185	AT2G02010.2,AT3G17760.2,AT5G17330.1,AT1G65960.2	response to cadmium ion, glutamate decarboxylase activity, calmodulin binding
Wa8730a008g003940	4.63477	3.71408	1.32827	6.17924e-45	8.61509e-41	0.958	0.731	.	cytosolic small ribosomal subunit, protein neddylation, ethylene biosynthetic process
Wa8730a014g001330	2.59448	1.67082	1.33256	4.44013e-33	6.19044e-29	0.723	0.488	AT1G69230.1,AT2G03680.1,AT1G26355.1,AT3G02180.1,AT5G15600.1	preprophase band, anisotropic cell growth, cortical microtubule, transverse to long axis
Wa8730a001g012590	1.36132	0.431826	1.34098	1.03201e-55	1.43882e-51	0.535	0.166	.	chromatin binding, structural constituent of chromatin, chromatin
Wa8730a002g004740	1.39459	0.455351	1.35504	5.07415e-45	7.07438e-41	0.485	0.15	AT2G21130.1,AT2G16600.1,AT4G34870.1,AT4G38740.1,AT2G38730.1	de-etiolation, red, far-red light phototransduction, multivesicular body
Wa8730a003g001430	4.50131	3.54773	1.37572	7.42865e-117	1.0357e-112	0.999	0.896	AT1G17640.1,AT2G21660.1	poly(U) RNA binding, stem cell development, stem cell differentiation
Wa8730a008g001830	2.00765	1.01069	1.43831	1.79174e-56	2.49805e-52	0.685	0.357	.	serine-type endopeptidase activity, mucilage extrusion from seed coat, mucilage metabolic process involved in seed coat development
Wa8730a005g005910	1.34871	0.348949	1.44235	2.10714e-58	2.93778e-54	0.526	0.155	AT2G30970.1	L-aspartate:2-oxoglutarate aminotransferase activity, glutamate metabolic process, response to cadmium ion
Wa8730a005g000500	1.33417	0.333602	1.44352	9.85012e-53	1.3733e-48	0.477	0.121	AT3G15630.1,AT1G52720.1	0
Wa8730a009g006980	1.46717	0.452541	1.4638	2.98443e-52	4.16089e-48	0.55	0.215	AT2G15890.1	pollen tube guidance, mediator complex binding, embryo development ending in seed dormancy
Wa8730a010g005930	1.63714	0.615613	1.47375	1.38334e-55	1.92866e-51	0.598	0.251	AT1G76470.1	lignin biosynthetic process, negative regulation of circadian rhythm, cinnamoyl-CoA reductase activity
Wa8730a006g005950	1.68536	0.652892	1.48953	9.73573e-57	1.35735e-52	0.631	0.293	.	peptidyl-prolyl cis-trans isomerase activity, protein peptidyl-prolyl isomerization, FK506 binding
Wa8730a001g006240	1.7966	0.757936	1.49847	1.7341e-55	2.41768e-51	0.624	0.259	.	0
Wa8730a002g006600	1.1202	0.0806285	1.49979	1.82449e-62	2.54371e-58	0.394	0.03	AT5G23240.1	cytoplasm, chloroplast, obsolete cytoplasmic part
Wa8730a005g000010	2.48549	1.44558	1.50026	1.53411e-60	2.13886e-56	0.782	0.582	AT3G15840.1	0
Wa8730a009g004850	2.49103	1.43954	1.51699	1.11888e-88	1.55994e-84	0.856	0.551	AT3G22960.1,AT5G28840.1	nucleotide catabolic process, nicotinamide nucleotide biosynthetic process, pyruvate biosynthetic process
Wa8730a005g006880	1.72139	0.665898	1.52275	7.51536e-52	1.04779e-47	0.586	0.233	AT1G69830.1,AT1G10760.1	starch catabolic process, alpha-glucan, water dikinase activity, response to symbiotic fungus
Wa8730a015g005480	1.90461	0.832468	1.54677	3.2194e-57	4.48848e-53	0.672	0.373	AT4G36910.1,AT4G34120.1	obsolete cytoplasmic part, cell redox homeostasis, chloroplast
Wa8730a014g000240	1.35394	0.26087	1.57697	1.5685e-68	2.18681e-64	0.5	0.085	AT3G02360.1	pentose-phosphate shunt, phosphogluconate 2-dehydrogenase activity, pentose-phosphate shunt, oxidative branch
Wa8730a004g007200	1.19402	0.0526906	1.6466	1.20784e-74	1.68397e-70	0.414	0.01	AT1G06460.1	0
Wa8730a008g004400	1.71146	0.52234	1.71554	6.78048e-69	9.45335e-65	0.595	0.172	AT1G53680.1	glutathione binding, regulation of response to red or far red light, glutathione metabolic process
Wa8730a011g005650	1.46879	0.254553	1.75178	4.89001e-77	6.81765e-73	0.546	0.11	AT4G34200.1	obsolete plastid part, chloroplast stroma, obsolete chloroplast part
Wa8730a006g000440	4.36775	3.12352	1.79505	4.59388e-155	6.40478e-151	0.993	0.847	AT5G54770.1	drug metabolic process, thiazole biosynthetic process, thiamine biosynthetic process
Wa8730a003g002890	1.92526	0.657144	1.82951	1.01387e-81	1.41353e-77	0.677	0.22	AT3G29320.1	glycogen phosphorylase activity, pyridoxal phosphate binding, amyloplast
Wa8730a015g004430	1.82281	0.525615	1.87145	5.31686e-89	7.41277e-85	0.665	0.172	AT1G70310.1,AT1G23820.1	spermidine synthase activity, ammonium ion metabolic process, spermidine biosynthetic process
Wa8730a013g004290	1.44276	0.130563	1.8931	1.56584e-90	2.18309e-86	0.534	0.049	.	0
Wa8730a004g006600	1.70707	0.292261	2.04113	2.85815e-79	3.98484e-75	0.567	0.123	AT1G19660.1,AT1G75380.2	sequence-specific DNA binding, nucleic acid phosphodiester bond hydrolysis, nuclease activity
Wa8730a013g004860	2.8943	1.37841	2.18696	3.15331e-71	4.39635e-67	0.778	0.465	.	0
Wa8730a002g008180	1.79902	0.169148	2.3514	5.60365e-117	7.81261e-113	0.646	0.072	.	polysaccharide binding, amylopectin binding, dephosphorylation
Wa8730a006g003680	2.2958	0.656156	2.3655	3.63078e-127	5.06203e-123	0.785	0.195	AT5G13420.1	0
Wa8730a002g010430	3.37414	1.73436	2.3657	3.30942e-177	4.614e-173	0.963	0.605	AT2G37220.1,AT5G04280.1	stromule, poly(U) RNA binding, cold acclimation
Wa8730a016g004300	2.59312	0.784814	2.60883	1.17914e-126	1.64395e-122	0.798	0.221	AT1G02305.1,AT4G16190.1	cellular protein catabolic process, lysosome, immune response
Wa8730a012g000050	3.58895	1.74345	2.6625	1.02499e-189	1.42905e-185	0.969	0.658	AT3G52930.1,AT2G36460.1	nicotinamide nucleotide biosynthetic process, drug metabolic process, obsolete coenzyme biosynthetic process
Wa8730a006g006940	2.22522	0.373581	2.67134	3.07052e-141	4.28093e-137	0.752	0.107	AT5G06690.1	thioredoxin-disulfide reductase activity, cellular response to toxic substance, protein disulfide oxidoreductase activity
Wa8730a009g006620	3.10564	1.18878	2.76544	4.56615e-173	6.36613e-169	0.933	0.363	AT2G14160.1,AT3G03920.1,AT4G39260.1,AT2G21660.1	alternative mRNA splicing, via spliceosome, cytidine to uridine editing, single-stranded DNA binding

## Sheet: SC C Dusk vs Dawn
Dataset S8. Differential Expressed Genes for Supercluster C in Dusk vs. Dawn
Genes significantly differentially expressed (log2FC>1 & p_val_adj <0.05) with PCT > 10% in either PCT1 or PCT2
PCT1: Percentage of cells within the Dusk Supercluster expressing the gene
PCT2: Percentage of cells outside the Dawn Supercluster expressing the gene
Gene	Dusk Expression	Dawn Expression	Ave. Log2 FC	p Value	Adj. p Value	PCT1	PCT2	Arabidopsis Orthologues	Arabidopsis Gene Description
Wa8730a012g002610	0.0529971	1.89656	-2.65969	1.72299e-120	2.4022e-116	0.011	0.547	AT5G04180.1	0, response to anesthetic, response to carbon dioxide
Wa8730a017g003860	1.16128	2.60153	-2.07783	1.38614e-53	1.93256e-49	0.424	0.699	AT1G29930.1,AT5G54270.1	chlorophyll binding, photosynthesis, light reaction, chloroplast
Wa8730a013g004240	0.788544	1.84551	-1.52488	2.68088e-69	3.73768e-65	0.3	0.683	AT5G54190.1,AT4G27440.1	chloroplast thylakoid, obsolete chloroplast part, chloroplast outer membrane
Wa8730a006g003620	0.287694	1.33769	-1.51482	2.75086e-77	3.83524e-73	0.087	0.516	AT3G48780.1	endoplasmic reticulum subcompartment, sphingomyelin biosynthetic process, endoplasmic reticulum membrane
Wa8730a013g005950	0.924537	1.75042	-1.1915	6.81792e-44	9.50554e-40	0.365	0.652	AT4G00430.1,AT3G53420.1,AT1G01620.1,AT3G54820.1,AT2G37170.2	hydrogen peroxide transmembrane transport, water channel activity, obsolete antibiotic transport
Wa8730a008g001340	3.47454	4.28786	-1.17339	5.77774e-37	8.05533e-33	0.751	0.875	.
Wa8730a012g000440	3.38532	4.1901	-1.16105	4.62485e-87	6.44796e-83	0.985	0.991	.	photosynthetic electron transport chain, photosystem I, photosynthesis, light harvesting in photosystem I
Wa8730a008g003840	1.17665	1.94093	-1.10262	1.74091e-19	2.42718e-15	0.372	0.545	AT1G31260.1,AT4G19690.2,AT3G12750.1,AT2G32270.1,AT1G05300.1,AT2G30080.1,AT2G04032.1	cadmium ion transport, plasma membrane, zinc ion transmembrane transporter activity
Wa8730a014g001120	0.617455	1.36221	-1.07445	6.94381e-28	9.68106e-24	0.21	0.455	.	sphingolipid biosynthetic process, 3-dehydrosphinganine reductase activity, 3-keto-sphinganine metabolic process
Wa8730a009g000130	0.649547	1.39373	-1.07362	1.11826e-37	1.55907e-33	0.272	0.559	AT5G01530.1,AT2G40100.1,AT3G54890.1,AT3G08940.2	chlorophyll binding, response to far red light, pigment binding
Wa8730a004g000520	0.505419	1.22415	-1.0369	7.3541e-34	1.02531e-29	0.211	0.479	AT2G34430.1	obsolete plastid part, obsolete cofactor binding, photosynthesis, light reaction
Wa8730a007g005460	2.11447	2.82146	-1.01997	1.14335e-38	1.59406e-34	0.682	0.85	.	positive regulation of autophagosome assembly, 3-deoxy-8-phosphooctulonate synthase activity, ubiquitin activating enzyme activity
Wa8730a006g004370	1.47326	0.773394	1.0097	9.05727e-28	1.26276e-23	0.506	0.257	AT5G15180.1,AT5G39580.1,AT3G03670.1,AT5G64120.1,AT2G34060.1,AT1G05260.1,AT5G66390.1,AT2G41480.1,AT3G21770.1,AT1G49570.1	plasmodesma, peroxidase activity, cellular oxidant detoxification
Wa8730a011g002730	0.990406	0.285348	1.01718	8.55669e-23	1.19297e-18	0.284	0.089	.	0
Wa8730a006g002780	1.64643	0.936865	1.02368	2.97389e-17	4.14619e-13	0.447	0.246	.	pollen tube development, protease binding, pollen tube growth
Wa8730a001g008130	1.96745	1.24368	1.04418	1.67037e-43	2.32882e-39	0.703	0.402	AT5G11070.1	transcription factor binding, 0, embryonic axis specification
Wa8730a009g004010	1.66387	0.937012	1.04864	1.14697e-34	1.5991e-30	0.557	0.262	AT5G49520.1,AT3G62340.1,AT5G13080.1,AT2G47260.1	response to auxin, response to nematode, DNA-binding transcription factor activity
Wa8730a018g002950	2.29589	1.56302	1.0573	4.10413e-37	5.72198e-33	0.744	0.598	.	response to singlet oxygen, peptide-methionine (R)-S-oxide reductase activity, 0
Wa8730a009g006930	1.2985	0.54376	1.08887	1.41565e-24	1.9737e-20	0.428	0.202	AT4G37720.1,AT2G22860.1,AT3G49780.1	obsolete extracellular region part, extracellular matrix, cell population proliferation
Wa8730a013g002970	1.51251	0.738211	1.11708	9.88069e-35	1.37757e-30	0.506	0.221	.	0
Wa8730a006g004380	2.2012	1.41984	1.12725	8.04883e-40	1.12217e-35	0.734	0.516	AT3G07570.1	cell periphery, 0, plasma membrane
Wa8730a009g001190	2.16583	1.36855	1.15024	2.94495e-48	4.10585e-44	0.764	0.443	AT5G01600.1,AT2G40300.1,AT3G56090.1,AT3G11050.1	metal ion transport, response to cytokinin, leaf development
Wa8730a013g004170	1.64687	0.813408	1.20244	1.04045e-30	1.4506e-26	0.557	0.32	AT1G17860.1	negative regulation of endopeptidase activity, serine-type endopeptidase inhibitor activity, alpha-amylase inhibitor activity
Wa8730a001g012240	1.00086	0.167279	1.2026	3.51312e-59	4.89799e-55	0.428	0.06	AT2G39900.1,AT3G55770.1,AT2G45800.1	cellular component biogenesis, actin filament bundle assembly, actin filament binding
Wa8730a003g001170	1.59675	0.755739	1.21332	4.20048e-36	5.85631e-32	0.572	0.301	.	0
Wa8730a015g000910	2.40439	1.54507	1.23974	1.85868e-15	2.59137e-11	0.535	0.386	AT4G31500.1,AT5G07990.1	obsolete oxidation-reduction process, ent-kaurene oxidase activity, ent-kaurene oxidation to kaurenoic acid
Wa8730a015g001570	1.65532	0.780408	1.26223	9.11224e-45	1.27043e-40	0.563	0.224	AT5G48540.1	response to salicylic acid, response to karrikin, programmed cell death
Wa8730a014g000400	1.96749	1.06444	1.30283	5.12397e-36	7.14384e-32	0.622	0.361	AT4G37160.1,AT5G66920.1,AT3G13400.1	lignin biosynthetic process, 0, oxidoreductase activity, oxidizing metal ions
Wa8730a001g012130	2.4224	1.45445	1.39646	1.7853e-32	2.48906e-28	0.524	0.235	AT3G54040.2	0
Wa8730a017g000010	1.90199	0.910609	1.43027	1.94409e-55	2.71045e-51	0.671	0.327	.	0
Wa8730a003g005380	2.22522	1.19434	1.48725	3.65036e-29	5.08933e-25	0.567	0.32	AT3G46860.1,AT5G43570.1	cellular_component, 0, extracellular region
Wa8730a010g005880	1.31168	0.0719949	1.78849	5.64098e-67	7.86466e-63	0.416	0.035	AT1G80920.1	obsolete plastid part, response to light stimulus, chloroplast stroma
Wa8730a005g007220	0.811089	4.08252	-4.71968	1.65923e-254	2.3133e-250	0.231	0.991	AT1G29930.1,AT3G27690.2	obsolete thylakoid part, chloroplast envelope, plastoglobule
Wa8730a017g004030	0.265923	3.30927	-4.39062	5.45246e-211	7.60182e-207	0.068	0.862	.	response to UV-B, photoprotection, positive regulation of seed germination
Wa8730a004g004970	0.72318	3.06685	-3.3812	1.31398e-183	1.83196e-179	0.282	0.899	AT5G54270.1,AT1G61520.1,AT3G27690.2,AT2G34430.1,AT1G29920.1	photosynthesis, photosynthesis, light reaction, chloroplast
Wa8730a012g005370	1.25874	3.38625	-3.06935	5.18881e-159	7.23424e-155	0.465	0.916	AT3G47470.1	chlorophyll binding, pigment binding, photosynthesis, light harvesting in photosystem I
Wa8730a009g001550	0.387214	2.50948	-3.06178	1.67668e-182	2.33763e-178	0.15	0.837	AT3G56290.1	0
Wa8730a002g004940	0.394874	2.41194	-2.91001	7.09669e-169	9.8942e-165	0.139	0.809	AT1G19920.1	sulfate adenylyltransferase (ATP) activity, cellular response to sulfate starvation, adenylylsulfate kinase activity
Wa8730a006g005790	1.37347	3.32989	-2.82252	1.22946e-170	1.71412e-166	0.491	0.94	AT1G15820.1	pigment binding, photosynthesis, light harvesting in photosystem I, chlorophyll binding
Wa8730a007g006370	0.771278	2.61036	-2.65323	5.26681e-159	7.34299e-155	0.288	0.862	.	glucose-1-phosphate guanylyltransferase (GDP) activity, mannose-1-phosphate guanylyltransferase (GDP) activity, galactose-1-phosphate guanylyltransferase (GDP) activity
Wa8730a001g008310	1.52472	3.2355	-2.46812	2.22063e-171	3.096e-167	0.552	0.943	AT1G15820.1	obsolete cofactor binding, photosynthesis, light reaction, chlorophyll binding
Wa8730a010g002310	0.442388	2.13247	-2.43827	6.04744e-134	8.43134e-130	0.159	0.743	AT5G42110.1	endocytosis, 0, regulation of endocytosis
Wa8730a007g001430	2.24824	3.89337	-2.37341	6.42105e-212	8.95223e-208	0.803	0.996	AT1G44575.1	chloroplast thylakoid, obsolete thylakoid part, chloroplast thylakoid membrane
Wa8730a008g004320	0.795187	2.43041	-2.35913	7.09954e-135	9.89818e-131	0.269	0.823	AT4G21990.1,AT1G62180.2,AT4G04610.1	sulfate assimilation, phosphoadenylyl sulfate reduction by phosphoadenylyl-sulfate reductase (thioredoxin), obsolete oxidation-reduction process, obsolete plastid part
Wa8730a009g000670	2.31725	3.84158	-2.19915	1.13774e-176	1.58624e-172	0.84	0.987	AT3G54890.1,AT3G08940.2	response to red light, photosynthesis, light harvesting in photosystem I, obsolete cofactor binding
Wa8730a001g004620	1.10744	2.61482	-2.1747	3.42253e-140	4.77169e-136	0.462	0.878	AT3G56940.1	obsolete thylakoid part, chloroplast organization, obsolete oxidation-reduction process
Wa8730a007g002830	2.09247	3.58173	-2.14855	8.08504e-151	1.12722e-146	0.773	0.966	.	pigment binding, plastoglobule, chlorophyll binding
Wa8730a010g003830	0.190801	1.67927	-2.1474	3.29588e-110	4.59511e-106	0.063	0.592	.	chloroplast thylakoid, chloroplast thylakoid lumen, obsolete thylakoid part
Wa8730a004g000350	0.771709	2.25911	-2.14586	2.7751e-139	3.86905e-135	0.346	0.839	.	0
Wa8730a009g000490	3.34408	4.80427	-2.10661	3.34041e-207	4.65719e-203	0.99	1	AT2G39730.1,AT5G59250.1	carbohydrate:proton symporter activity, ribulose-1,5-bisphosphate carboxylase/oxygenase activator activity, glucose import
Wa8730a016g000080	1.47041	2.91803	-2.08846	1.08731e-167	1.51593e-163	0.592	0.952	AT1G74470.1	geranylgeranyl reductase activity, obsolete cofactor metabolic process, phytyl diphosphate biosynthetic process
Wa8730a020g000810	1.69431	3.12686	-2.06673	5.21456e-103	7.27014e-99	0.423	0.84	AT3G52720.1,AT5G04180.1,AT1G08080.1,AT2G28210.1	0, response to anesthetic, response to carbon dioxide
Wa8730a014g002390	0.432458	1.86053	-2.06027	3.26812e-133	4.55641e-129	0.163	0.752	AT3G63410.1	vitamin E biosynthetic process, chloroplast inner membrane, methylation
Wa8730a002g007210	0.119903	1.50616	-1.99995	7.40969e-67	1.03306e-62	0.027	0.377	AT1G03630.2,AT4G27440.1,AT5G54190.1	chloroplast, skotomorphogenesis, obsolete plastid part
Wa8730a007g005080	2.4681	3.84394	-1.98492	2.76594e-163	3.85628e-159	0.867	0.987	AT4G10340.1	chloroplast stroma, photosynthesis, light reaction, obsolete thylakoid part
Wa8730a014g004390	1.73071	3.086	-1.95527	1.14354e-153	1.59433e-149	0.665	0.953	AT2G16460.1,AT2G01140.1	pyruvate biosynthetic process, gluconeogenesis, ATP biosynthetic process
Wa8730a014g000020	0.535114	1.86703	-1.92155	1.54001e-109	2.14709e-105	0.211	0.727	.	chlorophyll biosynthetic process, heme biosynthetic process, glutamyl-tRNA reductase activity
Wa8730a012g001170	0.740744	2.04297	-1.87871	2.27833e-52	3.17644e-48	0.205	0.569	AT1G77060.1,AT1G21440.1	obsolete plastid part, chloroplast stroma, obsolete chloroplast part
Wa8730a006g002560	0.744777	2.0285	-1.85202	3.87038e-109	5.39609e-105	0.342	0.779	AT4G13615.1,AT3G24100.1	0
Wa8730a004g002900	1.93234	3.16848	-1.78337	4.9458e-133	6.89543e-129	0.669	0.955	AT4G33010.1,AT2G26080.1	glycine catabolic process, response to cadmium ion, apoplast
Wa8730a015g002060	0.735615	1.95688	-1.76192	1.48627e-101	2.07216e-97	0.293	0.764	AT2G24270.1	intracellular anatomical structure, cytoplasm, obsolete intracellular part
Wa8730a004g004780	0.0926245	1.31122	-1.75806	1.39478e-108	1.94461e-104	0.041	0.551	AT1G62190.1,AT4G27030.1	phosphatidylglycerol metabolic process, ubiquitin-dependent ERAD pathway, delta 3-trans-hexadecenoic acid phosphatidylglycerol desaturase activity
Wa8730a009g005910	2.41934	3.63266	-1.75046	1.33065e-81	1.85519e-77	0.801	0.918	AT5G54270.1	obsolete cofactor binding, obsolete thylakoid part, chlorophyll binding
Wa8730a003g004150	0.0686855	1.21782	-1.65785	9.58047e-107	1.33571e-102	0.019	0.512	AT5G19855.1	protein folding chaperone, chaperone-mediated protein folding, obsolete chloroplast part
Wa8730a009g003610	0.240729	1.37185	-1.63186	3.54355e-84	4.94042e-80	0.078	0.528	AT5G13630.1	magnesium chelatase complex, chloroplast inner membrane, chloroplast envelope
Wa8730a005g003990	0.758186	1.88881	-1.63115	1.73952e-80	2.42524e-76	0.314	0.711	AT1G64230.1,AT5G53300.4,AT4G27960.1,AT5G41700.5	cellular protein catabolic process, ubiquitin protein ligase binding, ubiquitin-dependent protein catabolic process
Wa8730a017g003930	0.138904	1.25046	-1.60364	4.04858e-68	5.64454e-64	0.065	0.438	AT1G29930.1,AT5G54270.1	chloroplast thylakoid membrane, pigment binding, chloroplast envelope
Wa8730a019g001460	0.917495	2.02324	-1.59526	2.44879e-56	3.4141e-52	0.211	0.597	AT2G30490.1,AT2G40890.1	trans-cinnamate 4-monooxygenase activity, p-coumarate 3-hydroxylase activity, coumarin biosynthetic process
Wa8730a001g006890	0.0748561	1.17794	-1.59141	2.76626e-75	3.85672e-71	0.03	0.413	AT5G05580.1,AT2G29980.1,AT3G11170.1	unsaturated fatty acid biosynthetic process, plastid membrane, omega-3 fatty acid desaturase activity
Wa8730a002g009390	0.1105	1.20168	-1.57423	5.02007e-91	6.99899e-87	0.047	0.501	AT3G24190.1	response to photooxidative stress, 0, regulation of tocopherol cyclase activity
Wa8730a006g003890	1.3686	2.43307	-1.5357	9.89451e-104	1.37949e-99	0.555	0.881	.	cytosol, phosphatase activity, dephosphorylation
Wa8730a010g005400	0.206228	1.24806	-1.50305	4.27339e-85	5.95796e-81	0.071	0.523	AT3G12120.1	nuclear outer membrane-endoplasmic reticulum membrane network, endoplasmic reticulum subcompartment, obsolete endoplasmic reticulum part
Wa8730a018g003640	0.0091389	1.04812	-1.49893	3.7682e-93	5.25362e-89	0.005	0.435	.	0
Wa8730a020g001730	0.204886	1.23382	-1.48444	4.21446e-53	5.8758e-49	0.093	0.421	AT2G31560.1,AT2G43340.1	negative regulation of transcription, DNA-templated, 0, response to heat
Wa8730a011g002510	0.552343	1.57346	-1.47316	3.51198e-72	4.8964e-68	0.238	0.644	AT5G52570.1	carotenoid metabolic process, xanthophyll biosynthetic process, 0
Wa8730a007g005200	0.195613	1.20155	-1.45126	1.07345e-69	1.4966e-65	0.073	0.466	AT5G49740.1,AT1G23020.7	obsolete oxidation-reduction process, ferric-chelate reductase activity, response to light stimulus
Wa8730a015g001450	0.321135	1.29772	-1.40892	8.0344e-77	1.12016e-72	0.135	0.567	AT5G57660.1,AT2G24790.1,AT5G24930.1,AT3G21150.1	regulation of photomorphogenesis, regulation of flower development, red light signaling pathway
Wa8730a002g009470	0.739183	1.6922	-1.37492	7.6179e-65	1.06209e-60	0.29	0.669	AT5G18930.1	spermidine biosynthetic process, drug metabolic process, adenosylmethionine decarboxylase activity
Wa8730a002g005400	0.508998	1.45965	-1.3715	2.11747e-76	2.95218e-72	0.161	0.607	AT1G32900.1	chloroplast starch grain, chloroplast, amyloplast
Wa8730a003g002280	1.01004	1.91239	-1.30182	3.05145e-66	4.25433e-62	0.406	0.754	AT5G67370.1	regulation of circadian rhythm, response to iron ion starvation, protein kinase CK2 complex
Wa8730a012g004550	0.527737	1.41802	-1.28441	5.55203e-57	7.74064e-53	0.191	0.569	AT4G24380.1,AT5G65400.2	0
Wa8730a003g006530	0.275809	1.15327	-1.26591	4.16552e-58	5.80757e-54	0.113	0.472	AT2G21970.1	chlorophyll binding, photosynthesis, light harvesting, photosynthesis, light reaction
Wa8730a013g002640	0.0929047	0.962497	-1.25456	9.93511e-74	1.38515e-69	0.027	0.409	AT5G24470.1,AT2G46790.1	red or far-red light signaling pathway, negative regulation of transcription, DNA-templated, circadian rhythm
Wa8730a017g001500	0.224407	1.09378	-1.25425	4.97314e-64	6.93355e-60	0.1	0.478	AT4G39030.1	salicylic acid biosynthetic process, response to nematode, antibiotic biosynthetic process
Wa8730a002g007540	0.0720731	0.939761	-1.25181	7.77581e-67	1.0841e-62	0.031	0.384	AT5G23730.1,AT5G52250.1	nuclear body, regulation of stomatal movement, response to red light
Wa8730a001g000320	0.0431426	0.890781	-1.22288	2.70175e-71	3.76678e-67	0.007	0.356	.	cytosol, calcium ion binding, hyperosmotic salinity response
Wa8730a011g001940	0.0767399	0.923295	-1.22132	7.94477e-65	1.10766e-60	0.046	0.399	AT2G38740.1	dephosphorylation, 2-deoxyglucose-6-phosphatase activity, glucose-6-phosphatase activity
Wa8730a006g005980	0.395183	1.2334	-1.20929	7.01079e-52	9.77444e-48	0.158	0.507	AT2G22240.1,AT5G10170.1	defense response to virus, reproduction, defense response to fungus
Wa8730a020g000640	0.437562	1.26973	-1.20056	2.64135e-54	3.68257e-50	0.195	0.544	AT5G04830.2	0
Wa8730a001g003580	0.178398	1.00842	-1.19747	2.08719e-44	2.90996e-40	0.068	0.353	AT2G47800.1,AT3G62700.1,AT1G71330.1	stomatal movement, ATPase activity, plant-type vacuole
Wa8730a014g005170	0.777867	1.60611	-1.19489	1.81296e-49	2.52763e-45	0.331	0.654	.	photoinhibition, obsolete thylakoid part, photosynthesis, light harvesting
Wa8730a001g001940	1.95555	2.74646	-1.14104	1.10709e-69	1.54351e-65	0.733	0.891	AT2G13360.1	serine-glyoxylate transaminase activity, glycine biosynthetic process, by transamination of glyoxylate, photorespiration
Wa8730a008g001000	3.78876	4.5723	-1.1304	6.56544e-49	9.15353e-45	0.88	0.921	.
Wa8730a005g000760	0.406342	1.18363	-1.12139	4.27555e-46	5.96097e-42	0.18	0.504	AT4G32590.1,AT3G16250.1	0, NAD(P)H dehydrogenase complex (plastoquinone), photosynthetic electron transport in photosystem I
Wa8730a006g004860	0.150342	0.927402	-1.12106	1.0973e-51	1.52986e-47	0.069	0.386	AT2G33270.1	chloroplast membrane, chloroplast, oxidoreductase activity, acting on a sulfur group of donors, disulfide as acceptor
Wa8730a005g008840	0.823459	1.59593	-1.11444	1.18704e-44	1.65496e-40	0.355	0.652	.	0
Wa8730a012g005100	0.35702	1.12807	-1.11239	1.72497e-48	2.40495e-44	0.128	0.459	AT4G09670.1,AT1G34200.1	cytoplasm, cytosol, obsolete cytoplasmic part
Wa8730a009g006790	0.644211	1.40516	-1.09781	7.91848e-50	1.104e-45	0.243	0.588	AT4G37760.1,AT2G22830.1,AT1G58440.1	response to water deprivation, sterol biosynthetic process, squalene monooxygenase activity
Wa8730a005g003400	0.162593	0.914981	-1.08547	8.57603e-53	1.19567e-48	0.061	0.378	AT1G64100.1,AT5G25630.1,AT3G61520.1	RNA binding, nucleic acid phosphodiester bond hydrolysis, RNA modification
Wa8730a008g003240	0.324591	1.07359	-1.08058	5.08163e-51	7.08481e-47	0.13	0.471	AT1G06690.1	chloroplast thylakoid membrane, obsolete thylakoid part, chloroplast thylakoid
Wa8730a006g002480	1.7406	2.47947	-1.06598	1.14633e-58	1.59821e-54	0.68	0.865	AT4G20360.2	chloroplast thylakoid membrane, nucleoid, apoplast
Wa8730a012g004010	1.10262	1.83168	-1.05182	1.0446e-38	1.45638e-34	0.438	0.685	AT3G17800.1,AT1G48450.1	response to acid chemical, response to wounding, response to ozone
Wa8730a004g003590	3.07567	3.80472	-1.0518	3.99325e-112	5.56739e-108	0.963	0.99	AT4G18360.1,AT3G14420.1	glycolate oxidase activity, peroxisome, hydrogen peroxide biosynthetic process
Wa8730a007g008930	0.20982	0.929759	-1.03865	1.9259e-43	2.68509e-39	0.069	0.355	AT2G27820.1,AT1G08250.1,AT5G22630.1,AT3G44720.1	drug metabolic process, arogenate dehydratase activity, response to karrikin
Wa8730a013g001250	1.56841	0.871504	1.00542	1.20396e-34	1.67856e-30	0.596	0.315	.	0
Wa8730a020g001790	0.758219	0.05992	1.00743	2.99851e-39	4.18052e-35	0.262	0.018	AT5G63420.1	5'-3' exonuclease activity, nucleic acid phosphodiester bond hydrolysis, chloroplast organization
Wa8730a005g006880	1.20215	0.499959	1.01304	2.10698e-27	2.93756e-23	0.443	0.199	AT1G69830.1,AT1G10760.1	starch catabolic process, alpha-glucan, water dikinase activity, response to symbiotic fungus
Wa8730a012g002080	1.92961	1.19433	1.06079	8.18167e-35	1.14069e-30	0.692	0.428	AT3G26740.1	obsolete thylakoid part, circadian rhythm, chloroplast thylakoid membrane protein complex
Wa8730a003g005640	1.46678	0.729601	1.06353	4.74601e-35	6.61689e-31	0.583	0.336	AT3G46860.1	0
Wa8730a010g005930	1.59184	0.840841	1.08346	5.12632e-42	7.14712e-38	0.644	0.349	AT1G76470.1	lignin biosynthetic process, negative regulation of circadian rhythm, cinnamoyl-CoA reductase activity
Wa8730a002g004180	1.71307	0.952111	1.09784	1.14267e-41	1.59311e-37	0.658	0.387	AT2G17710.1	0
Wa8730a009g004850	2.49157	1.72582	1.10474	2.35895e-68	3.28885e-64	0.865	0.701	AT3G22960.1,AT5G28840.1	nucleotide catabolic process, nicotinamide nucleotide biosynthetic process, pyruvate biosynthetic process
Wa8730a005g003350	1.35829	0.584936	1.11572	2.70516e-49	3.77154e-45	0.474	0.11	AT3G16120.1,AT1G52245.1	transport along microtubule, obsolete cell projection part, negative regulation of catalytic activity
Wa8730a001g012590	1.48446	0.707553	1.12085	4.18913e-46	5.84049e-42	0.628	0.33	.	chromatin binding, structural constituent of chromatin, chromatin
Wa8730a005g005910	1.07631	0.296376	1.12521	2.03767e-41	2.84091e-37	0.431	0.123	AT2G30970.1	L-aspartate:2-oxoglutarate aminotransferase activity, glutamate metabolic process, response to cadmium ion
Wa8730a002g008040	1.37568	0.594967	1.12634	2.11537e-41	2.94925e-37	0.565	0.271	AT2G37540.1	obsolete oxidation-reduction process, chloroplast inner membrane, chloroplast envelope
Wa8730a003g004610	0.974006	0.183684	1.14019	5.00195e-49	6.97372e-45	0.407	0.081	.	response to endoplasmic reticulum stress, protein folding, protein disulfide isomerase activity
Wa8730a016g003850	2.77153	1.98049	1.14123	8.79573e-59	1.2263e-54	0.862	0.65	AT2G02010.2,AT3G17760.2,AT5G17330.1,AT1G65960.2	response to cadmium ion, glutamate decarboxylase activity, calmodulin binding
Wa8730a008g005250	1.08103	0.282181	1.15249	1.50223e-51	2.0944e-47	0.454	0.104	AT5G54800.1,AT1G61800.1	response to nematode, glucose-6-phosphate transport, triose phosphate transmembrane transport
Wa8730a010g000190	0.911664	0.0928955	1.18123	8.49818e-55	1.18482e-50	0.356	0.026	.	GI
Wa8730a005g008950	1.97319	1.14678	1.19226	1.64668e-57	2.2958e-53	0.759	0.487	.	0
Wa8730a001g010220	1.2942	0.456184	1.209	4.92125e-44	6.86121e-40	0.521	0.204	AT1G80480.1,AT2G04620.2	zinc ion import across plasma membrane, zinc ion transmembrane transporter activity, regulation of sequestering of zinc ion
Wa8730a002g004740	1.85153	0.992712	1.23901	6.45491e-46	8.99944e-42	0.675	0.421	AT2G21130.1,AT2G16600.1,AT4G34870.1,AT4G38740.1,AT2G38730.1	de-etiolation, red, far-red light phototransduction, multivesicular body
Wa8730a006g005950	1.91681	1.02424	1.2877	2.78457e-63	3.88225e-59	0.742	0.434	.	peptidyl-prolyl cis-trans isomerase activity, protein peptidyl-prolyl isomerization, FK506 binding
Wa8730a014g000240	1.19865	0.289609	1.31147	3.25408e-56	4.53683e-52	0.49	0.122	AT3G02360.1	pentose-phosphate shunt, phosphogluconate 2-dehydrogenase activity, pentose-phosphate shunt, oxidative branch
Wa8730a019g003190	1.23446	0.312549	1.33004	3.70694e-49	5.16822e-45	0.485	0.145	.	obsolete thylakoid part, cytochrome b6f complex assembly, plastid thylakoid membrane
Wa8730a003g006820	2.00731	1.08227	1.33456	8.22831e-58	1.14719e-53	0.733	0.465	.	selenium compound metabolic process, pyridoxal phosphate binding, drug binding
Wa8730a015g005480	1.60232	0.637364	1.39214	3.83394e-55	5.34527e-51	0.628	0.28	AT4G36910.1,AT4G34120.1	obsolete cytoplasmic part, cell redox homeostasis, chloroplast
Wa8730a009g006980	1.30776	0.321845	1.42237	2.11896e-63	2.95426e-59	0.538	0.152	AT2G15890.1	pollen tube guidance, mediator complex binding, embryo development ending in seed dormancy
Wa8730a008g001830	2.60706	1.61301	1.43411	2.49061e-90	3.47241e-86	0.867	0.648	.	serine-type endopeptidase activity, mucilage extrusion from seed coat, mucilage metabolic process involved in seed coat development
Wa8730a008g004400	1.99553	0.997816	1.4394	1.4959e-70	2.08558e-66	0.753	0.435	AT1G53680.1	glutathione binding, regulation of response to red or far red light, glutathione metabolic process
Wa8730a015g004220	2.27961	1.19924	1.55865	6.32204e-86	8.81419e-82	0.815	0.472	AT3G02360.1	fusion of sperm to egg plasma membrane involved in double fertilization forming a zygote and endosperm, double fertilization forming a zygote and endosperm, cytosol
Wa8730a014g001330	1.61514	0.493099	1.61876	1.17544e-63	1.6388e-59	0.582	0.185	AT1G69230.1,AT2G03680.1,AT1G26355.1,AT3G02180.1,AT5G15600.1	preprophase band, anisotropic cell growth, cortical microtubule, transverse to long axis
Wa8730a011g005650	1.43207	0.299573	1.63384	6.62226e-77	9.23276e-73	0.567	0.12	AT4G34200.1	obsolete plastid part, chloroplast stroma, obsolete chloroplast part
Wa8730a007g000180	2.02981	0.886124	1.64999	1.26359e-88	1.7617e-84	0.77	0.384	AT5G04740.1	anther development, hydrogen peroxide mediated signaling pathway, response to molecule of bacterial origin
Wa8730a015g004430	1.78429	0.633353	1.66045	2.33612e-75	3.25703e-71	0.681	0.289	AT1G70310.1,AT1G23820.1	spermidine synthase activity, ammonium ion metabolic process, spermidine biosynthetic process
Wa8730a013g004290	1.20359	0.0162344	1.71299	4.52902e-98	6.31436e-94	0.501	0.006	.	0
Wa8730a004g002560	2.18572	0.961512	1.76616	1.9406e-89	2.70559e-85	0.769	0.402	.	protein transport to vacuole involved in ubiquitin-dependent protein catabolic process via the multivesicular body sorting pathway, response to salicylic acid, defense response to fungus
Wa8730a013g004860	1.80469	0.57525	1.77371	2.63714e-68	3.6767e-64	0.61	0.179	.	0
Wa8730a004g007200	1.26769	0.0148986	1.8074	5.12169e-100	7.14067e-96	0.511	0.009	AT1G06460.1	0
Wa8730a002g010430	2.94881	1.66995	1.845	5.52872e-146	7.70814e-142	0.94	0.638	AT2G37220.1,AT5G04280.1	stromule, poly(U) RNA binding, cold acclimation
Wa8730a005g000500	2.00799	0.716448	1.86331	1.32258e-103	1.84394e-99	0.743	0.249	AT3G15630.1,AT1G52720.1	0
Wa8730a005g000010	2.48335	1.17772	1.88362	4.34977e-120	6.06446e-116	0.871	0.507	AT3G15840.1	0
Wa8730a001g006240	2.24438	0.933446	1.89127	4.0538e-97	5.65181e-93	0.77	0.327	.	0
Wa8730a001g012410	1.65348	0.324265	1.91765	3.23708e-95	4.51314e-91	0.636	0.136	AT2G29630.1	thiamine biosynthetic process, ADP-ribose pyrophosphohydrolase activity, response to vitamin B1
Wa8730a002g008180	1.56307	0.230818	1.92204	3.04721e-100	4.24843e-96	0.612	0.092	.	polysaccharide binding, amylopectin binding, dephosphorylation
Wa8730a002g006600	1.40771	0.0335759	1.98245	3.96817e-111	5.53243e-107	0.563	0.016	AT5G23240.1	cytoplasm, chloroplast, obsolete cytoplasmic part
Wa8730a003g002890	1.78127	0.355104	2.05752	1.18818e-103	1.65656e-99	0.666	0.135	AT3G29320.1	glycogen phosphorylase activity, pyridoxal phosphate binding, amyloplast
Wa8730a009g006620	2.68405	1.18632	2.16076	5.65094e-140	7.87854e-136	0.885	0.444	AT2G14160.1,AT3G03920.1,AT4G39260.1,AT2G21660.1	alternative mRNA splicing, via spliceosome, cytidine to uridine editing, single-stranded DNA binding
Wa8730a004g006600	1.7993	0.274571	2.19972	1.78798e-111	2.4928e-107	0.664	0.119	AT1G19660.1,AT1G75380.2	sequence-specific DNA binding, nucleic acid phosphodiester bond hydrolysis, nuclease activity
Wa8730a017g000040	2.28047	0.706464	2.27081	2.93653e-117	4.09411e-113	0.77	0.243	.	spermidine transmembrane transporter activity, spermidine transmembrane transport, putrescine transmembrane transporter activity
Wa8730a003g001430	4.54747	2.93439	2.32717	6.35026e-219	8.85353e-215	1	0.878	AT1G17640.1,AT2G21660.1	poly(U) RNA binding, stem cell development, stem cell differentiation
Wa8730a012g000050	2.70103	1.03862	2.39835	3.49827e-166	4.87729e-162	0.934	0.405	AT3G52930.1,AT2G36460.1	nicotinamide nucleotide biosynthetic process, drug metabolic process, obsolete coenzyme biosynthetic process
Wa8730a006g003680	2.62517	0.707623	2.76643	3.50396e-171	4.88522e-167	0.878	0.302	AT5G13420.1	0
Wa8730a006g006940	2.00634	0.0713753	2.79156	2.92906e-168	4.0837e-164	0.756	0.019	AT5G06690.1	thioredoxin-disulfide reductase activity, cellular response to toxic substance, protein disulfide oxidoreductase activity
Wa8730a016g004300	2.48327	0.391265	3.01813	1.59042e-170	2.21737e-166	0.833	0.147	AT1G02305.1,AT4G16190.1	cellular protein catabolic process, lysosome, immune response
Wa8730a006g000440	3.72084	0.758716	4.27344	6.78647e-238	9.46169e-234	0.985	0.196	AT5G54770.1	drug metabolic process, thiazole biosynthetic process, thiamine biosynthetic process

## Sheet: SC D Dusk vs Dawn
Dataset S9. Differential Expressed Genes for Supercluster C in Dusk vs. Dawn
Genes significantly differentially expressed (log2FC>1 & p_val_adj <0.05) with PCT > 10% in either PCT1 or PCT2
PCT1: Percentage of cells within the Dusk Supercluster expressing the gene
PCT2: Percentage of cells outside the Dawn Supercluster expressing the gene
Gene	Dusk Expression	Dawn Expression	Ave. Log2 FC	p Value	Adj. p Value	PCT1	PCT2	Arabidopsis Orthologues	Arabidopsis Gene Description
Wa8730a010g004740	0.0398244	1.12292	-1.56258	1.03809e-43	1.4473e-39	0.008	0.303	AT1G10588.1,AT4G09600.1	0, extracellular region, plant-type cell wall
Wa8730a007g007600	0.248492	1.29432	-1.50881	9.28006e-36	1.29383e-31	0.073	0.388	AT3G53210.1,AT3G18200.2,AT5G64700.1	obsolete plasma membrane part, cellular response to auxin stimulus, cytoplasmic region
Wa8730a003g004640	0.278816	1.21596	-1.35201	6.98868e-36	9.74362e-32	0.052	0.355	AT1G74550.1,AT3G52970.1	ent-cassa-12,15-diene 11-hydroxylase activity, diterpene phytoalexin biosynthetic process, obsolete oxidation-reduction process
Wa8730a014g000600	0.525151	1.42047	-1.29167	2.11931e-20	2.95474e-16	0.116	0.358	.	0
Wa8730a007g004410	0.830986	1.70192	-1.2565	3.76164e-30	5.24448e-26	0.276	0.595	AT4G10240.1,AT1G06040.1,AT2G31380.1	obsolete transcription factor activity, transcription factor binding, photoperiodism, flowering, obsolete transcription factor activity, protein binding
Wa8730a019g002640	0.575441	1.42853	-1.23074	2.92875e-32	4.08326e-28	0.173	0.504	AT5G19140.1	0
Wa8730a014g004960	0.622006	1.42035	-1.15177	1.02962e-21	1.4355e-17	0.168	0.433	AT4G12320.1,AT4G22690.1,AT3G61040.1,AT2G45580.1,AT5G04630.1	response to UV-B, lignin biosynthetic process, obsolete oxidation-reduction process
Wa8730a018g001370	0.620582	1.39279	-1.11406	7.1017e-18	9.90119e-14	0.2	0.433	AT3G56200.1,AT2G40420.1	amino acid transmembrane transport, carboxylic acid transport, amino acid transmembrane transporter activity
Wa8730a004g001650	0.0732749	0.811236	-1.06465	6.52935e-32	9.10323e-28	0.032	0.289	.	cellular amino acid catabolic process, homogentisate catabolic process, homogentisate 1,2-dioxygenase activity
Wa8730a016g002350	1.53615	2.27304	-1.0631	4.25891e-22	5.93777e-18	0.46	0.7	AT1G37130.1,AT1G77760.1	response to symbiotic fungus, drug metabolic process, cytosol
Wa8730a019g002280	0.805863	1.51777	-1.02707	1.8588e-18	2.59154e-14	0.234	0.49	AT3G09260.1,AT4G27830.1,AT5G25980.2,AT1G45191.4	response to karrikin, peroxisome, anthocyanin-containing compound metabolic process
Wa8730a005g001580	0.496422	1.19604	-1.00934	7.7288e-14	1.07755e-09	0.113	0.3	AT5G12020.1	response to high light intensity, response to heat, response to hydrogen peroxide
Wa8730a012g002510	0.85425	0.149782	1.01633	2.9207e-18	4.07205e-14	0.265	0.044	AT3G01920.1	0
Wa8730a004g008210	1.5724	0.849293	1.04322	5.82853e-17	8.12614e-13	0.439	0.19	AT1G69840.4,AT5G51570.1	plasmodesma, protein histidine kinase binding, vacuolar membrane
Wa8730a002g003970	1.19606	0.470783	1.04636	2.17578e-13	3.03347e-09	0.349	0.146	AT5G37690.1,AT1G20132.1,AT5G41890.1,AT1G75880.2	cuticle development, 0, response to lithium ion
Wa8730a001g005160	1.20976	0.481609	1.05049	5.79926e-15	8.08533e-11	0.376	0.16	.	obsolete intracellular part, mRNA binding, nucleus
Wa8730a009g006370	1.31476	0.567698	1.07779	6.99446e-16	9.75168e-12	0.42	0.196	.	0
Wa8730a010g002150	1.23378	0.485124	1.08008	3.20151e-16	4.46355e-12	0.367	0.135	.	calcium-mediated signaling, plant-type vacuole, calcium ion transmembrane transport
Wa8730a006g003760	1.00925	0.257598	1.08441	2.36154e-17	3.29246e-13	0.312	0.083	AT4G14100.1,AT3G23760.1	cytoplasm, vacuole, obsolete cytoplasmic part
Wa8730a016g004000	1.21238	0.431553	1.12649	1.63776e-16	2.28336e-12	0.365	0.129	.	metal ion transport, plant-type vacuole membrane, seedling development
Wa8730a017g004540	2.0791	1.27929	1.15388	5.86776e-19	8.18083e-15	0.62	0.405	AT3G18000.1,AT1G48600.2,AT1G73600.2	root system development, reproduction, pollen tube growth
Wa8730a013g004360	1.58706	0.786998	1.15425	5.00557e-17	6.97877e-13	0.509	0.284	AT5G53490.1	0
Wa8730a010g005330	1.14829	0.332274	1.17726	5.80865e-16	8.09842e-12	0.359	0.14	AT2G42230.2	single-stranded DNA binding, negative regulation of response to salt stress, negative regulation of response to water deprivation
Wa8730a004g007620	1.30947	0.490897	1.18096	6.26239e-15	8.73102e-11	0.384	0.171	AT4G29060.1	mitochondrial RNA catabolic process, mitochondrial translational elongation, polyribonucleotide nucleotidyltransferase activity
Wa8730a012g004190	2.4812	1.60034	1.27082	8.83446e-30	1.2317e-25	0.745	0.479	AT1G68610.1,AT1G14870.1,AT1G49030.1	microgametogenesis, negative regulation of cell population proliferation, pollen sperm cell differentiation
Wa8730a005g001920	1.60255	0.518867	1.56342	9.63879e-27	1.34384e-22	0.473	0.157	AT5G56870.1,AT3G52840.1,AT4G26140.1,AT1G45130.1,AT4G36360.1,AT3G13750.1,AT2G28470.1	plant-type cell wall, beta-galactosidase activity, vacuole
Wa8730a012g004920	0.853418	2.13292	-1.84593	8.44654e-44	1.17762e-39	0.199	0.612	AT4G33500.1	cytoplasm, chloroplast, obsolete cytoplasmic part
Wa8730a011g002740	0.664909	1.84815	-1.70705	5.54221e-46	7.72695e-42	0.147	0.559	.	0
Wa8730a018g000010	0.0381576	1.10118	-1.53361	1.69519e-51	2.36343e-47	0.016	0.366	AT5G58770.1	plastid membrane organization, rubber cis-polyprenylcistransferase activity, polyprenol biosynthetic process
Wa8730a015g000810	1.18274	2.1327	-1.3705	6.95979e-25	9.70334e-21	0.321	0.606	AT4G30290.1,AT5G57550.1,AT2G18800.1,AT4G25820.1,AT5G48070.1	response to brassinosteroid, xyloglucan:xyloglucosyl transferase activity, response to mechanical stimulus
Wa8730a012g000060	0.599379	1.40012	-1.15522	9.15654e-27	1.2766e-22	0.178	0.482	AT1G43800.1,AT3G02630.1	fatty acid homeostasis, chloroplast, acyl-[acyl-carrier-protein] desaturase activity
Wa8730a005g007220	1.12109	4.19209	-4.43052	6.19046e-158	8.63074e-154	0.307	0.992	AT1G29930.1,AT3G27690.2	obsolete thylakoid part, chloroplast envelope, plastoglobule
Wa8730a017g004030	0.387064	2.56403	-3.1407	8.69341e-83	1.21204e-78	0.069	0.623	.	response to UV-B, photoprotection, positive regulation of seed germination
Wa8730a009g001550	0.547222	2.60762	-2.97252	3.80371e-116	5.30313e-112	0.15	0.829	AT3G56290.1	0
Wa8730a002g004940	0.522185	2.49642	-2.84821	1.03504e-104	1.44305e-100	0.132	0.782	AT1G19920.1	sulfate adenylyltransferase (ATP) activity, cellular response to sulfate starvation, adenylylsulfate kinase activity
Wa8730a004g004970	0.703276	2.57843	-2.70527	9.23983e-84	1.28822e-79	0.207	0.76	AT5G54270.1,AT1G61520.1,AT3G27690.2,AT2G34430.1,AT1G29920.1	photosynthesis, photosynthesis, light reaction, chloroplast
Wa8730a010g002310	0.750173	2.53634	-2.57689	3.71773e-97	5.18326e-93	0.208	0.81	AT5G42110.1	endocytosis, 0, regulation of endocytosis
Wa8730a008g003780	0.173972	1.93865	-2.54589	9.15973e-73	1.27705e-68	0.039	0.529	AT1G31260.1,AT4G19690.2,AT3G12750.1,AT2G32270.1,AT1G05300.1,AT2G30080.1,AT2G04032.1	cadmium ion transport, plasma membrane, zinc ion transmembrane transporter activity
Wa8730a004g000350	0.886097	2.54911	-2.39922	3.95623e-86	5.51577e-82	0.263	0.802	.	0
Wa8730a007g006370	1.14096	2.67333	-2.21074	1.03014e-82	1.43622e-78	0.347	0.846	.	glucose-1-phosphate guanylyltransferase (GDP) activity, mannose-1-phosphate guanylyltransferase (GDP) activity, galactose-1-phosphate guanylyltransferase (GDP) activity
Wa8730a008g004320	1.56901	3.00528	-2.0721	3.59129e-81	5.00698e-77	0.447	0.895	AT4G21990.1,AT1G62180.2,AT4G04610.1	sulfate assimilation, phosphoadenylyl sulfate reduction by phosphoadenylyl-sulfate reductase (thioredoxin), obsolete oxidation-reduction process, obsolete plastid part
Wa8730a012g001170	1.6065	3.03289	-2.05786	2.10994e-58	2.94167e-54	0.436	0.802	AT1G77060.1,AT1G21440.1	obsolete plastid part, chloroplast stroma, obsolete chloroplast part
Wa8730a017g001020	0.631955	2.05481	-2.05275	1.50825e-63	2.1028e-59	0.165	0.653	AT1G01490.4	metal ion transport, 0, cellular transition metal ion homeostasis
Wa8730a006g005790	1.70234	3.10982	-2.03057	4.05702e-68	5.6563e-64	0.507	0.882	AT1G15820.1	pigment binding, photosynthesis, light harvesting in photosystem I, chlorophyll binding
Wa8730a012g005370	1.79722	3.18649	-2.0043	3.23833e-68	4.51488e-64	0.559	0.901	AT3G47470.1	chlorophyll binding, pigment binding, photosynthesis, light harvesting in photosystem I
Wa8730a007g005200	0.282496	1.66101	-1.98877	3.65279e-61	5.09272e-57	0.068	0.523	AT5G49740.1,AT1G23020.7	obsolete oxidation-reduction process, ferric-chelate reductase activity, response to light stimulus
Wa8730a004g004780	0.120323	1.49029	-1.97644	1.26349e-76	1.76156e-72	0.031	0.534	AT1G62190.1,AT4G27030.1	phosphatidylglycerol metabolic process, ubiquitin-dependent ERAD pathway, delta 3-trans-hexadecenoic acid phosphatidylglycerol desaturase activity
Wa8730a005g003990	0.674012	2.02306	-1.94626	8.10511e-56	1.13001e-51	0.226	0.656	AT1G64230.1,AT5G53300.4,AT4G27960.1,AT5G41700.5	cellular protein catabolic process, ubiquitin protein ligase binding, ubiquitin-dependent protein catabolic process
Wa8730a011g002510	0.316944	1.61758	-1.87642	1.69415e-59	2.36199e-55	0.079	0.534	AT5G52570.1	carotenoid metabolic process, xanthophyll biosynthetic process, 0
Wa8730a003g004150	0.358476	1.63914	-1.84761	4.34406e-63	6.05648e-59	0.087	0.567	AT5G19855.1	protein folding chaperone, chaperone-mediated protein folding, obsolete chloroplast part
Wa8730a016g000080	1.51105	2.77549	-1.82419	1.05631e-71	1.47271e-67	0.509	0.86	AT1G74470.1	geranylgeranyl reductase activity, obsolete cofactor metabolic process, phytyl diphosphate biosynthetic process
Wa8730a002g009390	0.0809059	1.3424	-1.81995	3.19696e-58	4.45721e-54	0.032	0.438	AT3G24190.1	response to photooxidative stress, 0, regulation of tocopherol cyclase activity
Wa8730a002g010730	0.848392	2.10508	-1.81302	1.29917e-55	1.81131e-51	0.273	0.708	AT5G60540.1	pyridoxine metabolic process, glutaminase complex, glutaminase activity
Wa8730a002g000180	0.0665893	1.31853	-1.80616	5.37523e-65	7.49415e-61	0.019	0.449	AT4G27360.1	0
Wa8730a020g001730	0.585679	1.79712	-1.74775	4.01802e-35	5.60192e-31	0.181	0.521	AT2G31560.1,AT2G43340.1	negative regulation of transcription, DNA-templated, 0, response to heat
Wa8730a001g004620	1.29428	2.50248	-1.74307	1.28035e-63	1.78506e-59	0.407	0.813	AT3G56940.1	obsolete thylakoid part, chloroplast organization, obsolete oxidation-reduction process
Wa8730a014g000020	0.577957	1.76746	-1.71609	7.58495e-46	1.05749e-41	0.166	0.565	.	chlorophyll biosynthetic process, heme biosynthetic process, glutamyl-tRNA reductase activity
Wa8730a015g002060	0.453316	1.63878	-1.71026	1.84097e-52	2.56668e-48	0.111	0.543	AT2G24270.1	intracellular anatomical structure, cytoplasm, obsolete intracellular part
Wa8730a009g000670	2.50653	3.67153	-1.68075	5.79915e-74	8.08517e-70	0.774	0.97	AT3G54890.1,AT3G08940.2	response to red light, photosynthesis, light harvesting in photosystem I, obsolete cofactor binding
Wa8730a007g001430	3.05555	4.21061	-1.66641	1.58114e-95	2.20443e-91	0.863	0.989	AT1G44575.1	chloroplast thylakoid, obsolete thylakoid part, chloroplast thylakoid membrane
Wa8730a012g004010	1.25369	2.38822	-1.63679	1.30687e-48	1.82204e-44	0.399	0.771	AT3G17800.1,AT1G48450.1	response to acid chemical, response to wounding, response to ozone
Wa8730a006g003890	1.95841	3.07584	-1.61211	6.01678e-65	8.3886e-61	0.63	0.904	.	cytosol, phosphatase activity, dephosphorylation
Wa8730a014g002390	0.724751	1.82837	-1.59218	1.39783e-45	1.94886e-41	0.212	0.614	AT3G63410.1	vitamin E biosynthetic process, chloroplast inner membrane, methylation
Wa8730a018g003640	0.0164199	1.10133	-1.5652	2.67794e-60	3.73358e-56	0.003	0.386	.	0
Wa8730a002g006080	1.12949	2.20863	-1.55687	1.20898e-43	1.68555e-39	0.367	0.722	AT3G19900.1	0
Wa8730a011g000010	0.673574	1.73955	-1.53788	1.75313e-36	2.44421e-32	0.21	0.567	.	regulation of tocopherol cyclase activity, positive regulation of carotenoid biosynthetic process, plastoglobule organization
Wa8730a006g002560	0.218816	1.27679	-1.52634	3.44366e-44	4.80115e-40	0.06	0.419	AT4G13615.1,AT3G24100.1	0
Wa8730a012g004550	0.788266	1.83679	-1.51271	9.06301e-40	1.26356e-35	0.192	0.59	AT4G24380.1,AT5G65400.2	0
Wa8730a006g006550	0.275854	1.32367	-1.51167	5.31677e-48	7.41264e-44	0.09	0.488	AT1G68660.1	0, protein-macromolecule adaptor activity, positive regulation of proteolysis involved in cellular protein catabolic process
Wa8730a006g004860	0.0906766	1.12311	-1.48949	8.37098e-49	1.16708e-44	0.023	0.369	AT2G33270.1	chloroplast membrane, chloroplast, oxidoreductase activity, acting on a sulfur group of donors, disulfide as acceptor
Wa8730a010g005400	0.191874	1.20464	-1.46111	1.21698e-49	1.69672e-45	0.044	0.424	AT3G12120.1	nuclear outer membrane-endoplasmic reticulum membrane network, endoplasmic reticulum subcompartment, obsolete endoplasmic reticulum part
Wa8730a007g006090	0.952344	1.95469	-1.44608	8.58829e-42	1.19738e-37	0.307	0.678	AT4G09350.1	membrane protein complex, NAD(P)H dehydrogenase complex (plastoquinone), chloroplast thylakoid membrane
Wa8730a010g004010	0.810018	1.79735	-1.42442	1.82916e-34	2.55021e-30	0.267	0.598	.	photoinhibition, stromule, chloroplast thylakoid membrane
Wa8730a017g003930	0.169206	1.14482	-1.40751	6.61737e-42	9.22594e-38	0.044	0.375	AT1G29930.1,AT5G54270.1	chloroplast thylakoid membrane, pigment binding, chloroplast envelope
Wa8730a015g001410	0.776307	1.74446	-1.39675	1.0716e-35	1.49402e-31	0.229	0.587	AT4G28025.1	trehalose biosynthetic process, 0, trehalose metabolism in response to stress
Wa8730a005g000760	0.382975	1.34272	-1.38463	1.61341e-40	2.24942e-36	0.09	0.455	AT4G32590.1,AT3G16250.1	0, NAD(P)H dehydrogenase complex (plastoquinone), photosynthetic electron transport in photosystem I
Wa8730a003g002280	1.50093	2.45104	-1.37071	6.74134e-41	9.39877e-37	0.477	0.791	AT5G67370.1	regulation of circadian rhythm, response to iron ion starvation, protein kinase CK2 complex
Wa8730a007g001450	0.980314	1.92583	-1.36409	2.95996e-38	4.12678e-34	0.187	0.581	AT5G63160.1,AT3G48360.1	pollen development, sugar mediated signaling pathway, response to cold
Wa8730a010g003830	0.288407	1.22705	-1.35417	7.00418e-26	9.76523e-22	0.073	0.328	.	chloroplast thylakoid, chloroplast thylakoid lumen, obsolete thylakoid part
Wa8730a002g007630	0.447396	1.36508	-1.32394	3.84022e-31	5.35403e-27	0.108	0.421	AT5G38630.1	protein domain specific binding, oxidoreductase activity, obsolete oxidation-reduction process
Wa8730a015g001450	0.0484136	0.957782	-1.31194	2.34115e-40	3.26404e-36	0.023	0.317	AT5G57660.1,AT2G24790.1,AT5G24930.1,AT3G21150.1	regulation of photomorphogenesis, regulation of flower development, red light signaling pathway
Wa8730a009g006850	0.288435	1.18873	-1.29885	7.11923e-38	9.92563e-34	0.074	0.41	AT4G34350.1	isopentenyl diphosphate biosynthetic process, methylerythritol 4-phosphate pathway, isoprenoid biosynthetic process, 4-hydroxy-3-methylbut-2-en-1-yl diphosphate synthase activity
Wa8730a014g005170	0.679082	1.56339	-1.27579	1.08844e-31	1.5175e-27	0.205	0.54	.	photoinhibition, obsolete thylakoid part, photosynthesis, light harvesting
Wa8730a007g002830	2.35424	3.23531	-1.27111	4.58323e-39	6.38994e-35	0.751	0.898	.	pigment binding, plastoglobule, chlorophyll binding
Wa8730a004g004230	0.627977	1.47308	-1.21922	3.96057e-28	5.52182e-24	0.195	0.507	AT5G17230.1	cytoplasm, chloroplast, obsolete cytoplasmic part
Wa8730a018g003060	0.355987	1.19814	-1.21498	1.8188e-26	2.53577e-22	0.09	0.364	.	ammonium ion metabolic process, diacylglycerol cholinephosphotransferase activity, CDP-choline pathway
Wa8730a004g002990	0.290148	1.11645	-1.1921	2.00371e-30	2.79358e-26	0.087	0.383	.	0
Wa8730a004g008480	2.19208	3.01749	-1.19082	8.2079e-18	1.14435e-13	0.57	0.766	AT3G24500.1	nucleolus, positive regulation of transcription, DNA-templated, transcription coactivator activity
Wa8730a011g001940	0.211886	1.01907	-1.16452	5.35394e-27	7.46446e-23	0.061	0.317	AT2G38740.1	dephosphorylation, 2-deoxyglucose-6-phosphatase activity, glucose-6-phosphatase activity
Wa8730a003g006530	0.406696	1.20817	-1.15629	4.24954e-23	5.92471e-19	0.134	0.397	AT2G21970.1	chlorophyll binding, photosynthesis, light harvesting, photosynthesis, light reaction
Wa8730a001g006890	0.301516	1.09659	-1.14705	4.06912e-30	5.67316e-26	0.081	0.369	AT5G05580.1,AT2G29980.1,AT3G11170.1	unsaturated fatty acid biosynthetic process, plastid membrane, omega-3 fatty acid desaturase activity
Wa8730a007g005080	3.27102	4.05069	-1.12482	2.04152e-54	2.84628e-50	0.921	0.981	AT4G10340.1	chloroplast stroma, photosynthesis, light reaction, obsolete thylakoid part
Wa8730a001g008310	2.2365	3.0058	-1.10986	9.00635e-33	1.25566e-28	0.661	0.862	AT1G15820.1	obsolete cofactor binding, photosynthesis, light reaction, chlorophyll binding
Wa8730a010g004860	0.644595	1.4107	-1.10525	7.30007e-21	1.01778e-16	0.195	0.455	AT3G07700.1,AT5G24970.2	cellular response to oxidative stress, response to iron ion starvation, iron ion homeostasis
Wa8730a014g003560	0.759315	1.50415	-1.07457	5.12647e-28	7.14733e-24	0.181	0.518	AT1G32350.1,AT3G22370.1,AT5G64210.1	alternative respiration, mitochondria-nucleus signaling pathway, obsolete oxidation-reduction process
Wa8730a014g004390	2.51645	3.26092	-1.07405	1.3539e-51	1.88761e-47	0.784	0.948	AT2G16460.1,AT2G01140.1	pyruvate biosynthetic process, gluconeogenesis, ATP biosynthetic process
Wa8730a014g006200	2.69437	3.43606	-1.07003	1.07938e-42	1.50487e-38	0.837	0.934	AT4G35090.1,AT1G20630.1	obsolete cofactor catabolic process, response to hydrogen peroxide, cellular component biogenesis
Wa8730a009g000490	4.58299	5.31927	-1.06223	5.33582e-73	7.4392e-69	0.998	0.997	AT2G39730.1,AT5G59250.1	carbohydrate:proton symporter activity, ribulose-1,5-bisphosphate carboxylase/oxygenase activator activity, glucose import
Wa8730a002g007210	0.318054	1.0407	-1.04256	3.10088e-14	4.32325e-10	0.081	0.253	AT1G03630.2,AT4G27440.1,AT5G54190.1	chloroplast, skotomorphogenesis, obsolete plastid part
Wa8730a014g000250	0.766257	1.48814	-1.04145	1.65751e-21	2.3109e-17	0.246	0.512	AT2G14110.1	phosphatase activity, dephosphorylation, fructosamine metabolic process
Wa8730a006g002480	1.94907	2.66836	-1.03772	6.67958e-35	9.31267e-31	0.628	0.868	AT4G20360.2	chloroplast thylakoid membrane, nucleoid, apoplast
Wa8730a009g006790	0.49663	1.21519	-1.03666	5.58752e-24	7.79011e-20	0.134	0.413	AT4G37760.1,AT2G22830.1,AT1G58440.1	response to water deprivation, sterol biosynthetic process, squalene monooxygenase activity
Wa8730a008g001000	0.723474	1.44148	-1.03587	1.41471e-09	1.97238e-05	0.134	0.292	.
Wa8730a003g005640	0.956606	0.250114	1.01925	1.48707e-14	2.07328e-10	0.302	0.099	AT3G46860.1	0
Wa8730a007g003750	1.41047	0.693076	1.03498	1.20409e-13	1.67874e-09	0.425	0.218	AT5G13330.1,AT2G33710.1,AT5G51190.1,AT5G61890.1	DNA-binding transcription factor activity, cellular response to freezing, sequence-specific DNA binding
Wa8730a013g005650	1.24941	0.526437	1.04302	2.37129e-15	3.30605e-11	0.402	0.179	AT5G64140.1,AT5G03850.1,AT3G10090.1	intracellular anatomical structure, cytoplasm, obsolete intracellular part
Wa8730a006g004690	1.13556	0.388595	1.07764	4.76544e-12	6.64398e-08	0.3	0.121	AT5G15230.1,AT3G02885.1,AT1G74670.1	cellular response to acid chemical, cellular response to gibberellin stimulus, gibberellic acid mediated signaling pathway
Wa8730a019g002180	1.13307	0.381715	1.08398	1.24148e-12	1.73088e-08	0.33	0.138	AT3G05590.1,AT2G47570.1,AT5G27850.1	structural constituent of ribosome, obsolete cytosolic part, gene expression
Wa8730a007g004840	1.01804	0.265219	1.08609	3.10922e-17	4.33488e-13	0.331	0.102	AT4G13530.2	0
Wa8730a018g001000	1.22996	0.471873	1.09369	1.82327e-15	2.542e-11	0.381	0.16	AT5G60390.1,AT1G07930.1	GTPase activity, translation elongation factor activity, translational elongation
Wa8730a008g000400	1.09809	0.337317	1.09756	3.28293e-17	4.57706e-13	0.346	0.113	.	cellular amino acid biosynthetic process, L-threonine ammonia-lyase activity, isoleucine biosynthetic process
Wa8730a009g000760	1.39385	0.62656	1.10697	3.59268e-16	5.00892e-12	0.439	0.207	AT5G02960.1,AT3G09680.1	polysomal ribosome, cytosolic small ribosomal subunit, 0
Wa8730a005g005910	1.20934	0.434935	1.11723	2.23692e-16	3.11872e-12	0.376	0.146	AT2G30970.1	L-aspartate:2-oxoglutarate aminotransferase activity, glutamate metabolic process, response to cadmium ion
Wa8730a004g001510	1.30512	0.530314	1.11781	2.45227e-16	3.41895e-12	0.423	0.196	AT3G58610.3	obsolete cofactor binding, protein homodimerization activity, magnesium ion binding
Wa8730a012g001820	1.51273	0.736396	1.12001	2.82388e-18	3.93705e-14	0.486	0.237	.	structural constituent of ribosome, large ribosomal subunit rRNA binding, cytosolic large ribosomal subunit
Wa8730a004g002560	1.88504	1.10725	1.12212	1.6731e-17	2.33264e-13	0.562	0.333	.	protein transport to vacuole involved in ubiquitin-dependent protein catabolic process via the multivesicular body sorting pathway, response to salicylic acid, defense response to fungus
Wa8730a001g012410	1.48482	0.700732	1.1312	5.20989e-16	7.26363e-12	0.478	0.256	AT2G29630.1	thiamine biosynthetic process, ADP-ribose pyrophosphohydrolase activity, response to vitamin B1
Wa8730a012g002730	1.60956	0.820024	1.13905	1.42022e-22	1.98007e-18	0.528	0.231	AT3G25070.1	response to molecule of bacterial origin, defense response to bacterium, extrinsic component of plasma membrane
Wa8730a005g008950	1.52716	0.728716	1.15191	7.43141e-20	1.03609e-15	0.501	0.237	.	0
Wa8730a005g006660	0.86459	0.061831	1.15814	1.5594e-21	2.17411e-17	0.262	0.025	AT1G10657.2	0
Wa8730a018g002360	1.54154	0.735893	1.1623	5.96541e-17	8.31698e-13	0.499	0.275	AT1G02830.1,AT5G27770.1,AT3G05560.1	cytosolic large ribosomal subunit, cytoplasmic translation, polysomal ribosome
Wa8730a007g000290	1.37179	0.55943	1.17198	1.88327e-17	2.62565e-13	0.439	0.201	AT2G36160.1,AT3G11510.1,AT3G52580.1	cytosolic ribosome, ribosomal small subunit assembly, ribosomal small subunit biogenesis
Wa8730a003g001430	4.10529	3.25903	1.22089	2.34404e-72	3.26806e-68	0.989	0.912	AT1G17640.1,AT2G21660.1	poly(U) RNA binding, stem cell development, stem cell differentiation
Wa8730a003g006820	1.41185	0.557781	1.23217	5.82421e-21	8.12012e-17	0.443	0.16	.	selenium compound metabolic process, pyridoxal phosphate binding, drug binding
Wa8730a001g012590	1.26898	0.390315	1.26765	6.8018e-26	9.48308e-22	0.436	0.121	.	chromatin binding, structural constituent of chromatin, chromatin
Wa8730a006g000900	1.71981	0.838978	1.27077	3.24605e-23	4.52564e-19	0.572	0.325	AT5G45680.1	thylakoid lumen, chaperone-mediated protein folding, peptidyl-prolyl cis-trans isomerase activity
Wa8730a009g006980	1.48361	0.575158	1.31062	6.48032e-23	9.03486e-19	0.489	0.209	AT2G15890.1	pollen tube guidance, mediator complex binding, embryo development ending in seed dormancy
Wa8730a015g006080	1.87901	0.940581	1.35387	5.65889e-21	7.88963e-17	0.564	0.298	AT1G15690.1	0, pyrophosphate hydrolysis-driven proton transmembrane transporter activity, establishment or maintenance of transmembrane electrochemical gradient
Wa8730a011g005650	1.36699	0.414992	1.37344	1.32176e-23	1.8428e-19	0.423	0.129	AT4G34200.1	obsolete plastid part, chloroplast stroma, obsolete chloroplast part
Wa8730a007g000180	1.85894	0.890665	1.39693	2.99306e-28	4.17293e-24	0.611	0.333	AT5G04740.1	anther development, hydrogen peroxide mediated signaling pathway, response to molecule of bacterial origin
Wa8730a019g003190	1.28181	0.295372	1.42313	2.40936e-27	3.35913e-23	0.412	0.096	.	obsolete thylakoid part, cytochrome b6f complex assembly, plastid thylakoid membrane
Wa8730a005g000140	2.29457	1.29293	1.44507	6.06523e-37	8.45614e-33	0.721	0.43	.	0
Wa8730a004g007200	1.07238	0.0469391	1.47939	3.15823e-30	4.4032e-26	0.321	0.014	AT1G06460.1	0
Wa8730a015g004430	1.45518	0.380568	1.55034	9.10049e-32	1.26879e-27	0.472	0.113	AT1G70310.1,AT1G23820.1	spermidine synthase activity, ammonium ion metabolic process, spermidine biosynthetic process
Wa8730a006g005950	1.56645	0.483594	1.56223	9.86696e-33	1.37565e-28	0.523	0.165	.	peptidyl-prolyl cis-trans isomerase activity, protein peptidyl-prolyl isomerization, FK506 binding
Wa8730a005g006880	1.5925	0.508324	1.56413	2.83004e-25	3.94564e-21	0.465	0.163	AT1G69830.1,AT1G10760.1	starch catabolic process, alpha-glucan, water dikinase activity, response to symbiotic fungus
Wa8730a015g005480	2.14474	1.05439	1.57305	2.1533e-40	3.00213e-36	0.708	0.372	AT4G36910.1,AT4G34120.1	obsolete cytoplasmic part, cell redox homeostasis, chloroplast
Wa8730a013g004290	1.14606	0.0494513	1.58208	1.13346e-35	1.58027e-31	0.367	0.014	.	0
Wa8730a005g000010	2.62228	1.49243	1.63004	4.69045e-48	6.53943e-44	0.792	0.501	AT3G15840.1	0
Wa8730a009g006620	2.59943	1.46172	1.64138	9.12592e-53	1.27234e-48	0.809	0.463	AT2G14160.1,AT3G03920.1,AT4G39260.1,AT2G21660.1	alternative mRNA splicing, via spliceosome, cytidine to uridine editing, single-stranded DNA binding
Wa8730a002g006600	1.39046	0.235988	1.66555	3.68549e-32	5.13831e-28	0.422	0.074	AT5G23240.1	cytoplasm, chloroplast, obsolete cytoplasmic part
Wa8730a008g001830	2.09583	0.928436	1.68419	3.41192e-39	4.75689e-35	0.649	0.284	.	serine-type endopeptidase activity, mucilage extrusion from seed coat, mucilage metabolic process involved in seed coat development
Wa8730a008g003940	4.44842	3.25993	1.71464	1.66456e-51	2.32073e-47	0.987	0.821	.	cytosolic small ribosomal subunit, protein neddylation, ethylene biosynthetic process
Wa8730a002g008180	1.57412	0.342024	1.77753	2.32158e-41	3.23674e-37	0.507	0.088	.	polysaccharide binding, amylopectin binding, dephosphorylation
Wa8730a010g005930	1.57402	0.316376	1.81439	1.41917e-38	1.97861e-34	0.498	0.102	AT1G76470.1	lignin biosynthetic process, negative regulation of circadian rhythm, cinnamoyl-CoA reductase activity
Wa8730a003g002890	1.64148	0.324074	1.90062	4.98937e-42	6.95618e-38	0.514	0.091	AT3G29320.1	glycogen phosphorylase activity, pyridoxal phosphate binding, amyloplast
Wa8730a009g004850	2.26217	0.930643	1.92099	2.88292e-56	4.01937e-52	0.746	0.314	AT3G22960.1,AT5G28840.1	nucleotide catabolic process, nicotinamide nucleotide biosynthetic process, pyruvate biosynthetic process
Wa8730a008g004400	1.6031	0.238613	1.96854	1.30747e-45	1.82287e-41	0.522	0.083	AT1G53680.1	glutathione binding, regulation of response to red or far red light, glutathione metabolic process
Wa8730a002g010430	3.08238	1.64207	2.07792	1.09865e-83	1.53173e-79	0.9	0.565	AT2G37220.1,AT5G04280.1	stromule, poly(U) RNA binding, cold acclimation
Wa8730a004g006600	1.77262	0.330661	2.08031	4.39372e-47	6.12573e-43	0.549	0.102	AT1G19660.1,AT1G75380.2	sequence-specific DNA binding, nucleic acid phosphodiester bond hydrolysis, nuclease activity
Wa8730a013g004860	3.01004	1.51355	2.15897	2.48263e-71	3.46128e-67	0.855	0.463	.	0
Wa8730a015g001060	1.81798	0.298182	2.19261	4.01329e-46	5.59533e-42	0.522	0.072	AT4G30190.1,AT5G57350.1,AT2G18960.1,AT2G24520.2,AT2G07560.1,AT1G80660.1,AT1G17260.1	ATPase activity, energy coupled proton transmembrane transport, against electrochemical gradient, proton-exporting ATPase activity, phosphorylative mechanism
Wa8730a006g003680	1.91848	0.358933	2.24995	2.23685e-56	3.11861e-52	0.616	0.116	AT5G13420.1	0
Wa8730a016g004300	2.93916	1.29441	2.37287	6.07395e-63	8.4683e-59	0.8	0.394	AT1G02305.1,AT4G16190.1	cellular protein catabolic process, lysosome, immune response
Wa8730a006g000440	4.14007	2.24114	2.73958	5.07198e-122	7.07136e-118	0.985	0.672	AT5G54770.1	drug metabolic process, thiazole biosynthetic process, thiamine biosynthetic process
Wa8730a006g006940	2.25853	0.309226	2.81225	8.80384e-84	1.22743e-79	0.729	0.091	AT5G06690.1	thioredoxin-disulfide reductase activity, cellular response to toxic substance, protein disulfide oxidoreductase activity
Wa8730a012g000050	3.29038	1.14059	3.10149	1.1603e-114	1.6177e-110	0.924	0.361	AT3G52930.1,AT2G36460.1	nicotinamide nucleotide biosynthetic process, drug metabolic process, obsolete coenzyme biosynthetic process

## Sheet: CA Dawn Up GO
Dataset S9. Enriched GO terms for SC A DEGs Upregulated at Dawn
GO	NS	Name	Ratio in Study	Ratio in Pop.	p Value	Depth	Study Count	p Value (BH-FDR)	Genes
GO:0009765	BP	photosynthesis, light harvesting	12/185	31/13944	2.35332e-15	4	12	1.62732e-11	Wa8730a001g008310, Wa8730a003g006530, Wa8730a004g004970, Wa8730a006g005790, Wa8730a007g002830, Wa8730a007g005080, Wa8730a008g000240, Wa8730a009g000670, Wa8730a009g005910, Wa8730a012g005370, Wa8730a014g005170, Wa8730a014g005440
GO:0009416	BP	response to light stimulus	31/185	418/13944	4.75575e-15	4	31	1.6443e-11	Wa8730a001g008310, Wa8730a002g003100, Wa8730a002g003810, Wa8730a002g007540, Wa8730a003g000120, Wa8730a003g005060, Wa8730a003g006530, Wa8730a004g004970, Wa8730a004g007640, Wa8730a005g001190, Wa8730a006g005790, Wa8730a006g005980, Wa8730a007g002830, Wa8730a007g005080, Wa8730a007g005200, Wa8730a007g008930, Wa8730a008g000240, Wa8730a009g000670, Wa8730a009g005910, Wa8730a010g001720, Wa8730a010g004010, …
GO:0019684	BP	photosynthesis, light reaction	15/185	72/13944	2.3418e-14	4	15	5.39784e-11	Wa8730a001g008310, Wa8730a003g006530, Wa8730a004g004970, Wa8730a006g005790, Wa8730a007g002830, Wa8730a007g005080, Wa8730a007g005200, Wa8730a008g000240, Wa8730a009g000670, Wa8730a009g005910, Wa8730a010g001720, Wa8730a011g000010, Wa8730a012g005370, Wa8730a014g005170, Wa8730a014g005440
GO:0009642	BP	response to light intensity	17/185	108/13944	5.60985e-14	5	17	8.95328e-11	Wa8730a001g008310, Wa8730a002g007540, Wa8730a003g006530, Wa8730a004g004970, Wa8730a004g007640, Wa8730a005g001190, Wa8730a006g005980, Wa8730a007g008930, Wa8730a008g000240, Wa8730a009g000670, Wa8730a009g005910, Wa8730a010g004010, Wa8730a012g005370, Wa8730a014g005170, Wa8730a014g005440, Wa8730a017g004030, Wa8730a020g002090
GO:0009314	BP	response to radiation	31/185	460/13944	6.47381e-14	3	31	8.95328e-11	Wa8730a001g008310, Wa8730a002g003100, Wa8730a002g003810, Wa8730a002g007540, Wa8730a003g000120, Wa8730a003g005060, Wa8730a003g006530, Wa8730a004g004970, Wa8730a004g007640, Wa8730a005g001190, Wa8730a006g005790, Wa8730a006g005980, Wa8730a007g002830, Wa8730a007g005080, Wa8730a007g005200, Wa8730a007g008930, Wa8730a008g000240, Wa8730a009g000670, Wa8730a009g005910, Wa8730a010g001720, Wa8730a010g004010, …
GO:0009644	BP	response to high light intensity	13/185	53/13944	1.36745e-13	6	13	1.57599e-10	Wa8730a001g008310, Wa8730a003g006530, Wa8730a004g004970, Wa8730a004g007640, Wa8730a006g005980, Wa8730a008g000240, Wa8730a009g000670, Wa8730a009g005910, Wa8730a010g004010, Wa8730a012g005370, Wa8730a014g005170, Wa8730a014g005440, Wa8730a017g004030
GO:0015979	BP	photosynthesis	15/185	86/13944	3.7573e-13	3	15	3.71168e-10	Wa8730a001g008310, Wa8730a003g006530, Wa8730a004g004970, Wa8730a006g005790, Wa8730a007g002830, Wa8730a007g005080, Wa8730a007g005200, Wa8730a008g000240, Wa8730a009g000670, Wa8730a009g005910, Wa8730a010g001720, Wa8730a011g000010, Wa8730a012g005370, Wa8730a014g005170, Wa8730a014g005440
GO:0009768	BP	photosynthesis, light harvesting in photosystem I	8/185	14/13944	2.31465e-12	5	8	2.00072e-09	Wa8730a001g008310, Wa8730a004g004970, Wa8730a006g005790, Wa8730a007g002830, Wa8730a007g005080, Wa8730a009g000670, Wa8730a009g005910, Wa8730a012g005370
GO:0009628	BP	response to abiotic stimulus	44/185	1086/13944	1.2951e-11	2	44	9.95065e-09	Wa8730a001g003580, Wa8730a001g006900, Wa8730a001g008310, Wa8730a001g011910, Wa8730a002g003100, Wa8730a002g003810, Wa8730a002g007540, Wa8730a003g000120, Wa8730a003g005060, Wa8730a003g006530, Wa8730a004g004780, Wa8730a004g004970, Wa8730a004g007640, Wa8730a004g008480, Wa8730a005g001190, Wa8730a005g003480, Wa8730a006g000580, Wa8730a006g005790, Wa8730a006g005980, Wa8730a007g001450, Wa8730a007g002830, …
GO:0006091	BP	generation of precursor metabolites and energy	16/185	172/13944	1.08146e-09	3	16	7.47831e-07	Wa8730a001g008310, Wa8730a003g006530, Wa8730a004g004970, Wa8730a006g005790, Wa8730a007g002830, Wa8730a007g005080, Wa8730a007g005200, Wa8730a008g000240, Wa8730a009g000670, Wa8730a009g005910, Wa8730a010g001720, Wa8730a011g000010, Wa8730a012g005370, Wa8730a014g003560, Wa8730a014g005170, Wa8730a014g005440
GO:0009645	BP	response to low light intensity stimulus	5/185	8/13944	2.11184e-08	6	5	1.32758e-05	Wa8730a001g008310, Wa8730a007g008930, Wa8730a009g000670, Wa8730a009g005910, Wa8730a012g005370
GO:0010218	BP	response to far red light	7/185	27/13944	4.58335e-08	6	7	2.64115e-05	Wa8730a002g003100, Wa8730a002g007540, Wa8730a007g005080, Wa8730a009g000670, Wa8730a009g005910, Wa8730a010g001720, Wa8730a017g004030
GO:0010114	BP	response to red light	7/185	31/13944	1.29768e-07	6	7	6.90267e-05	Wa8730a002g007540, Wa8730a007g005080, Wa8730a009g000670, Wa8730a009g005910, Wa8730a010g001720, Wa8730a011g000010, Wa8730a017g004030
GO:0009266	BP	response to temperature stimulus	18/185	321/13944	2.70928e-07	3	18	0.000133819	Wa8730a001g006900, Wa8730a001g008310, Wa8730a001g011910, Wa8730a002g003810, Wa8730a003g000120, Wa8730a003g005060, Wa8730a004g007640, Wa8730a004g008480, Wa8730a006g000580, Wa8730a006g005980, Wa8730a007g001450, Wa8730a009g000670, Wa8730a009g005910, Wa8730a010g004010, Wa8730a012g005370, Wa8730a014g003560, Wa8730a016g003000, Wa8730a017g004030
GO:0009409	BP	response to cold	14/185	220/13944	1.38325e-06	4	14	0.000600868	Wa8730a001g006900, Wa8730a001g008310, Wa8730a002g003810, Wa8730a003g000120, Wa8730a003g005060, Wa8730a006g000580, Wa8730a007g001450, Wa8730a009g000670, Wa8730a009g005910, Wa8730a010g004010, Wa8730a012g005370, Wa8730a014g003560, Wa8730a016g003000, Wa8730a017g004030
GO:0009637	BP	response to blue light	7/185	43/13944	1.3903e-06	5	7	0.000600868	Wa8730a007g005080, Wa8730a007g008930, Wa8730a009g000670, Wa8730a009g005910, Wa8730a010g001720, Wa8730a011g000010, Wa8730a017g004030
GO:0009639	BP	response to red or far red light	9/185	97/13944	5.49054e-06	5	9	0.00223336	Wa8730a002g003100, Wa8730a002g007540, Wa8730a007g005080, Wa8730a009g000670, Wa8730a009g005910, Wa8730a010g001720, Wa8730a011g000010, Wa8730a015g003560, Wa8730a017g004030
GO:0006544	BP	glycine metabolic process	3/185	4/13944	9.10246e-06	9	3	0.00348544	Wa8730a001g001940, Wa8730a003g000120, Wa8730a004g002900
GO:0006950	BP	response to stress	40/185	1474/13944	9.57677e-06	2	40	0.00348544	Wa8730a001g003580, Wa8730a001g006900, Wa8730a001g008310, Wa8730a001g011910, Wa8730a002g003810, Wa8730a002g004940, Wa8730a002g007540, Wa8730a003g000120, Wa8730a003g002280, Wa8730a003g005060, Wa8730a003g006530, Wa8730a004g003590, Wa8730a004g004780, Wa8730a004g004970, Wa8730a004g007640, Wa8730a004g008480, Wa8730a005g003480, Wa8730a005g008000, Wa8730a006g000580, Wa8730a006g005980, Wa8730a007g001450, …
GO:0050896	BP	response to stimulus	57/185	2566/13944	4.93446e-05	1	57	0.0164658	Wa8730a001g003580, Wa8730a001g006900, Wa8730a001g008310, Wa8730a001g011910, Wa8730a002g003100, Wa8730a002g003810, Wa8730a002g004940, Wa8730a002g007540, Wa8730a003g000120, Wa8730a003g002280, Wa8730a003g005060, Wa8730a003g006530, Wa8730a004g002900, Wa8730a004g003590, Wa8730a004g004780, Wa8730a004g004970, Wa8730a004g007640, Wa8730a004g008480, Wa8730a005g001190, Wa8730a005g003480, Wa8730a005g008000, …
GO:0015994	BP	chlorophyll metabolic process	5/185	31/13944	5.00045e-05	6	5	0.0164658	Wa8730a001g004620, Wa8730a004g007640, Wa8730a011g000010, Wa8730a014g000020, Wa8730a016g000080
GO:0009658	BP	chloroplast organization	9/185	140/13944	0.000103263	6	9	0.0297527	Wa8730a001g004620, Wa8730a002g003100, Wa8730a002g007540, Wa8730a006g000580, Wa8730a010g001720, Wa8730a010g004860, Wa8730a011g000010, Wa8730a014g005170, Wa8730a017g001470
GO:0010189	BP	vitamin E biosynthetic process	3/185	8/13944	0.000122524	6	3	0.0305442	Wa8730a004g007640, Wa8730a014g002390, Wa8730a016g000080
GO:0042360	BP	vitamin E metabolic process	3/185	8/13944	0.000122524	5	3	0.0305442	Wa8730a004g007640, Wa8730a014g002390, Wa8730a016g000080
GO:0010207	BP	photosystem II assembly	3/185	8/13944	0.000122524	7	3	0.0305442	Wa8730a007g005080, Wa8730a008g000240, Wa8730a010g001720
GO:0042440	BP	pigment metabolic process	7/185	84/13944	0.000123679	2	7	0.0305442	Wa8730a001g004620, Wa8730a002g007540, Wa8730a011g000010, Wa8730a011g002510, Wa8730a014g000020, Wa8730a015g004980, Wa8730a016g000080
GO:0009769	BP	photosynthesis, light harvesting in photosystem II	2/185	2/13944	0.000175084	5	2	0.0405958	Wa8730a004g004970, Wa8730a009g005910
GO:0006775	BP	fat-soluble vitamin metabolic process	3/185	9/13944	0.000181991	4	3	0.0405958	Wa8730a004g007640, Wa8730a014g002390, Wa8730a016g000080
GO:0042362	BP	fat-soluble vitamin biosynthetic process	3/185	9/13944	0.000181991	5	3	0.0405958	Wa8730a004g007640, Wa8730a014g002390, Wa8730a016g000080
GO:0006139	BP	nucleobase-containing compound metabolic process	4/185	1390/13944	5.72975e-05	4	4	0.0180096	Wa8730a002g007540, Wa8730a005g003400, Wa8730a009g003340, Wa8730a010g001720
GO:0043170	BP	macromolecule metabolic process	14/185	2515/13944	6.70155e-05	3	14	0.0201484	Wa8730a001g011910, Wa8730a002g005400, Wa8730a002g007540, Wa8730a004g004780, Wa8730a005g003400, Wa8730a006g000580, Wa8730a007g001450, Wa8730a007g008500, Wa8730a008g000240, Wa8730a009g003340, Wa8730a010g001720, Wa8730a011g000010, Wa8730a014g005170, Wa8730a014g005440
GO:0009534	CC	chloroplast thylakoid	26/185	247/13944	2.21934e-16	5	26	1.45369e-13	Wa8730a001g004620, Wa8730a001g008310, Wa8730a003g000120, Wa8730a003g006530, Wa8730a004g002900, Wa8730a004g004970, Wa8730a004g007640, Wa8730a005g001190, Wa8730a006g005790, Wa8730a007g001430, Wa8730a007g002830, Wa8730a007g005080, Wa8730a007g006090, Wa8730a008g000240, Wa8730a008g003240, Wa8730a009g000670, Wa8730a009g005910, Wa8730a010g004010, Wa8730a010g004860, Wa8730a012g005370, Wa8730a014g005170, …
GO:0031976	CC	plastid thylakoid	26/185	249/13944	2.70705e-16	4	26	1.45369e-13	Wa8730a001g004620, Wa8730a001g008310, Wa8730a003g000120, Wa8730a003g006530, Wa8730a004g002900, Wa8730a004g004970, Wa8730a004g007640, Wa8730a005g001190, Wa8730a006g005790, Wa8730a007g001430, Wa8730a007g002830, Wa8730a007g005080, Wa8730a007g006090, Wa8730a008g000240, Wa8730a008g003240, Wa8730a009g000670, Wa8730a009g005910, Wa8730a010g004010, Wa8730a010g004860, Wa8730a012g005370, Wa8730a014g005170, …
GO:0009507	CC	chloroplast	56/185	1296/13944	4.52174e-16	6	56	1.61878e-13	Wa8730a001g001940, Wa8730a001g004620, Wa8730a001g006900, Wa8730a001g008310, Wa8730a002g004940, Wa8730a002g005400, Wa8730a003g000120, Wa8730a003g004150, Wa8730a003g006530, Wa8730a004g002900, Wa8730a004g003590, Wa8730a004g004230, Wa8730a004g004780, Wa8730a004g004970, Wa8730a004g005980, Wa8730a004g007640, Wa8730a005g001190, Wa8730a005g008000, Wa8730a006g000580, Wa8730a006g002480, Wa8730a006g004860, …
GO:0009536	CC	plastid	56/185	1339/13944	1.90178e-15	5	56	5.10628e-13	Wa8730a001g001940, Wa8730a001g004620, Wa8730a001g006900, Wa8730a001g008310, Wa8730a002g004940, Wa8730a002g005400, Wa8730a003g000120, Wa8730a003g004150, Wa8730a003g006530, Wa8730a004g002900, Wa8730a004g003590, Wa8730a004g004230, Wa8730a004g004780, Wa8730a004g004970, Wa8730a004g005980, Wa8730a004g007640, Wa8730a005g001190, Wa8730a005g008000, Wa8730a006g000580, Wa8730a006g002480, Wa8730a006g004860, …
GO:0010287	CC	plastoglobule	14/185	53/13944	4.88084e-15	2	14	1.0484e-12	Wa8730a001g008310, Wa8730a004g004970, Wa8730a004g007640, Wa8730a006g005790, Wa8730a007g002830, Wa8730a007g005080, Wa8730a008g003240, Wa8730a009g000670, Wa8730a009g005910, Wa8730a010g004010, Wa8730a010g004860, Wa8730a011g000010, Wa8730a012g005370, Wa8730a017g004570
GO:0009535	CC	chloroplast thylakoid membrane	22/185	197/13944	1.52433e-14	6	22	2.72855e-12	Wa8730a001g004620, Wa8730a001g008310, Wa8730a003g006530, Wa8730a004g004970, Wa8730a005g001190, Wa8730a006g005790, Wa8730a007g001430, Wa8730a007g002830, Wa8730a007g005080, Wa8730a007g006090, Wa8730a008g000240, Wa8730a008g003240, Wa8730a009g000670, Wa8730a009g005910, Wa8730a010g004010, Wa8730a010g004860, Wa8730a012g005370, Wa8730a014g005170, Wa8730a015g003560, Wa8730a016g000080, Wa8730a017g004030, …
GO:0055035	CC	plastid thylakoid membrane	22/185	202/13944	2.57922e-14	5	22	3.95726e-12	Wa8730a001g004620, Wa8730a001g008310, Wa8730a003g006530, Wa8730a004g004970, Wa8730a005g001190, Wa8730a006g005790, Wa8730a007g001430, Wa8730a007g002830, Wa8730a007g005080, Wa8730a007g006090, Wa8730a008g000240, Wa8730a008g003240, Wa8730a009g000670, Wa8730a009g005910, Wa8730a010g004010, Wa8730a010g004860, Wa8730a012g005370, Wa8730a014g005170, Wa8730a015g003560, Wa8730a016g000080, Wa8730a017g004030, …
GO:0009579	CC	thylakoid	26/185	306/13944	3.93741e-14	3	26	5.28597e-12	Wa8730a001g004620, Wa8730a001g008310, Wa8730a003g000120, Wa8730a003g006530, Wa8730a004g002900, Wa8730a004g004970, Wa8730a004g007640, Wa8730a005g001190, Wa8730a006g005790, Wa8730a007g001430, Wa8730a007g002830, Wa8730a007g005080, Wa8730a007g006090, Wa8730a008g000240, Wa8730a008g003240, Wa8730a009g000670, Wa8730a009g005910, Wa8730a010g004010, Wa8730a010g004860, Wa8730a012g005370, Wa8730a014g005170, …
GO:0042651	CC	thylakoid membrane	22/185	215/13944	9.45255e-14	4	22	1.11756e-11	Wa8730a001g004620, Wa8730a001g008310, Wa8730a003g006530, Wa8730a004g004970, Wa8730a005g001190, Wa8730a006g005790, Wa8730a007g001430, Wa8730a007g002830, Wa8730a007g005080, Wa8730a007g006090, Wa8730a008g000240, Wa8730a008g003240, Wa8730a009g000670, Wa8730a009g005910, Wa8730a010g004010, Wa8730a010g004860, Wa8730a012g005370, Wa8730a014g005170, Wa8730a015g003560, Wa8730a016g000080, Wa8730a017g004030, …
GO:0034357	CC	photosynthetic membrane	22/185	216/13944	1.04056e-13	3	22	1.11756e-11	Wa8730a001g004620, Wa8730a001g008310, Wa8730a003g006530, Wa8730a004g004970, Wa8730a005g001190, Wa8730a006g005790, Wa8730a007g001430, Wa8730a007g002830, Wa8730a007g005080, Wa8730a007g006090, Wa8730a008g000240, Wa8730a008g003240, Wa8730a009g000670, Wa8730a009g005910, Wa8730a010g004010, Wa8730a010g004860, Wa8730a012g005370, Wa8730a014g005170, Wa8730a015g003560, Wa8730a016g000080, Wa8730a017g004030, …
GO:0009570	CC	chloroplast stroma	29/185	450/13944	1.40394e-12	3	29	1.37076e-10	Wa8730a001g001940, Wa8730a001g008310, Wa8730a002g004940, Wa8730a003g000120, Wa8730a003g004150, Wa8730a004g002900, Wa8730a004g003590, Wa8730a004g004970, Wa8730a004g005980, Wa8730a004g007640, Wa8730a005g008000, Wa8730a006g005790, Wa8730a007g002830, Wa8730a007g005080, Wa8730a008g000240, Wa8730a008g003240, Wa8730a008g004320, Wa8730a009g000490, Wa8730a009g000670, Wa8730a009g003610, Wa8730a009g005910, …
GO:0009532	CC	plastid stroma	29/185	459/13944	2.29701e-12	2	29	2.05582e-10	Wa8730a001g001940, Wa8730a001g008310, Wa8730a002g004940, Wa8730a003g000120, Wa8730a003g004150, Wa8730a004g002900, Wa8730a004g003590, Wa8730a004g004970, Wa8730a004g005980, Wa8730a004g007640, Wa8730a005g008000, Wa8730a006g005790, Wa8730a007g002830, Wa8730a007g005080, Wa8730a008g000240, Wa8730a008g003240, Wa8730a008g004320, Wa8730a009g000490, Wa8730a009g000670, Wa8730a009g003610, Wa8730a009g005910, …
GO:0009526	CC	plastid envelope	26/185	369/13944	3.05154e-12	4	26	2.52104e-10	Wa8730a001g004620, Wa8730a001g006900, Wa8730a001g008310, Wa8730a003g000120, Wa8730a004g002900, Wa8730a004g004780, Wa8730a004g004970, Wa8730a004g007640, Wa8730a006g000580, Wa8730a006g005790, Wa8730a007g002830, Wa8730a007g005080, Wa8730a008g000240, Wa8730a008g003240, Wa8730a009g000670, Wa8730a009g003610, Wa8730a009g005910, Wa8730a010g004010, Wa8730a012g005370, Wa8730a014g002390, Wa8730a014g005170, …
GO:0009941	CC	chloroplast envelope	24/185	353/13944	4.74604e-11	5	24	3.64089e-09	Wa8730a001g004620, Wa8730a001g006900, Wa8730a001g008310, Wa8730a004g002900, Wa8730a004g004780, Wa8730a004g004970, Wa8730a004g007640, Wa8730a006g000580, Wa8730a006g005790, Wa8730a007g002830, Wa8730a007g005080, Wa8730a008g000240, Wa8730a008g003240, Wa8730a009g000670, Wa8730a009g003610, Wa8730a009g005910, Wa8730a012g005370, Wa8730a014g002390, Wa8730a014g005170, Wa8730a016g000080, Wa8730a017g001470, …
GO:0031984	CC	organelle subcompartment	29/185	679/13944	2.23521e-08	2	29	1.60041e-06	Wa8730a001g004620, Wa8730a001g008310, Wa8730a003g000120, Wa8730a003g006530, Wa8730a004g002900, Wa8730a004g004970, Wa8730a004g007640, Wa8730a005g001190, Wa8730a005g003480, Wa8730a006g005790, Wa8730a007g001430, Wa8730a007g002830, Wa8730a007g005080, Wa8730a007g006090, Wa8730a008g000240, Wa8730a008g003240, Wa8730a009g000670, Wa8730a009g005910, Wa8730a010g004010, Wa8730a010g004860, Wa8730a011g005590, …
GO:0031967	CC	organelle envelope	26/185	584/13944	5.72886e-08	3	26	3.61929e-06	Wa8730a001g004620, Wa8730a001g006900, Wa8730a001g008310, Wa8730a003g000120, Wa8730a004g002900, Wa8730a004g004780, Wa8730a004g004970, Wa8730a004g007640, Wa8730a006g000580, Wa8730a006g005790, Wa8730a007g002830, Wa8730a007g005080, Wa8730a008g000240, Wa8730a008g003240, Wa8730a009g000670, Wa8730a009g003610, Wa8730a009g005910, Wa8730a010g004010, Wa8730a012g005370, Wa8730a014g002390, Wa8730a014g005170, …
GO:0031975	CC	envelope	26/185	584/13944	5.72886e-08	2	26	3.61929e-06	Wa8730a001g004620, Wa8730a001g006900, Wa8730a001g008310, Wa8730a003g000120, Wa8730a004g002900, Wa8730a004g004780, Wa8730a004g004970, Wa8730a004g007640, Wa8730a006g000580, Wa8730a006g005790, Wa8730a007g002830, Wa8730a007g005080, Wa8730a008g000240, Wa8730a008g003240, Wa8730a009g000670, Wa8730a009g003610, Wa8730a009g005910, Wa8730a010g004010, Wa8730a012g005370, Wa8730a014g002390, Wa8730a014g005170, …
GO:0042170	CC	plastid membrane	8/185	90/13944	2.52923e-05	4	8	0.00150911	Wa8730a001g004620, Wa8730a001g006900, Wa8730a004g004780, Wa8730a004g007640, Wa8730a006g000580, Wa8730a008g000240, Wa8730a009g003610, Wa8730a014g002390
GO:0031969	CC	chloroplast membrane	7/185	82/13944	0.000106147	5	7	0.00600007	Wa8730a001g004620, Wa8730a004g004780, Wa8730a004g007640, Wa8730a006g000580, Wa8730a008g000240, Wa8730a009g003610, Wa8730a014g002390
GO:0009706	CC	chloroplast inner membrane	5/185	39/13944	0.000155499	6	5	0.00817565	Wa8730a001g004620, Wa8730a004g007640, Wa8730a006g000580, Wa8730a009g003610, Wa8730a014g002390
GO:0009517	CC	PSII associated light-harvesting complex II	2/185	2/13944	0.000175084	5	2	0.00817565	Wa8730a007g005080, Wa8730a009g005910
GO:0030076	CC	light-harvesting complex	2/185	2/13944	0.000175084	2	2	0.00817565	Wa8730a007g005080, Wa8730a009g005910
GO:0009503	CC	thylakoid light-harvesting complex	2/185	2/13944	0.000175084	4	2	0.00817565	Wa8730a007g005080, Wa8730a009g005910
GO:0009528	CC	plastid inner membrane	5/185	43/13944	0.000249066	5	5	0.0111457	Wa8730a001g004620, Wa8730a004g007640, Wa8730a006g000580, Wa8730a009g003610, Wa8730a014g002390
GO:0005737	CC	cytoplasm	81/185	4342/13944	0.000298265	2	81	0.0128135	Wa8730a001g001940, Wa8730a001g003580, Wa8730a001g004620, Wa8730a001g006900, Wa8730a001g008310, Wa8730a001g011910, Wa8730a002g004940, Wa8730a002g005400, Wa8730a002g009470, Wa8730a002g010730, Wa8730a003g000120, Wa8730a003g004150, Wa8730a003g006530, Wa8730a004g002900, Wa8730a004g003590, Wa8730a004g004230, Wa8730a004g004780, Wa8730a004g004970, Wa8730a004g005980, Wa8730a004g007640, Wa8730a004g007740, …
GO:0009523	CC	photosystem II	2/185	4/13944	0.00103221	4	2	0.0426381	Wa8730a007g005080, Wa8730a009g005910
GO:0016168	MF	chlorophyll binding	9/185	16/13944	1.10668e-13	4	9	2.61729e-10	Wa8730a001g008310, Wa8730a003g006530, Wa8730a004g004970, Wa8730a006g005790, Wa8730a007g002830, Wa8730a007g005080, Wa8730a009g000670, Wa8730a009g005910, Wa8730a012g005370
GO:0031409	MF	pigment binding	8/185	13/13944	1.00331e-12	2	8	1.18642e-09	Wa8730a001g008310, Wa8730a004g004970, Wa8730a006g005790, Wa8730a007g002830, Wa8730a007g005080, Wa8730a009g000670, Wa8730a009g005910, Wa8730a012g005370
GO:0046906	MF	tetrapyrrole binding	9/185	27/13944	3.99848e-11	3	9	3.15213e-08	Wa8730a001g008310, Wa8730a003g006530, Wa8730a004g004970, Wa8730a006g005790, Wa8730a007g002830, Wa8730a007g005080, Wa8730a009g000670, Wa8730a009g005910, Wa8730a012g005370
GO:0019904	MF	protein domain specific binding	7/185	53/13944	5.94688e-06	3	7	0.0035161	Wa8730a001g008310, Wa8730a004g004970, Wa8730a007g005080, Wa8730a009g000670, Wa8730a009g005910, Wa8730a012g005370, Wa8730a020g002090

## Sheet: CA Dusk Up GO
Dataset S9. Enriched GO terms for SC A DEGs Upregulated at Dusk
GO	NS	Name	Ratio in Study	Ratio in Pop.	p Value	Depth	Study Count	p Value (BH-FDR)	Genes
GO:0006412	BP	translation	22/180	150/13944	2.38281e-17	7	22	1.27424e-13	Wa8730a001g008200, Wa8730a001g009730, Wa8730a001g011950, Wa8730a002g002780, Wa8730a003g002350, Wa8730a005g006590, Wa8730a006g004210, Wa8730a006g007110, Wa8730a008g001910, Wa8730a009g005820, Wa8730a010g002940, Wa8730a011g005130, Wa8730a011g005920, Wa8730a013g003980, Wa8730a013g005640, Wa8730a014g001510, Wa8730a014g007120, Wa8730a015g000150, Wa8730a017g003730, Wa8730a018g001000, Wa8730a019g002070, …
GO:0043043	BP	peptide biosynthetic process	22/180	153/13944	3.68544e-17	6	22	1.27424e-13	Wa8730a001g008200, Wa8730a001g009730, Wa8730a001g011950, Wa8730a002g002780, Wa8730a003g002350, Wa8730a005g006590, Wa8730a006g004210, Wa8730a006g007110, Wa8730a008g001910, Wa8730a009g005820, Wa8730a010g002940, Wa8730a011g005130, Wa8730a011g005920, Wa8730a013g003980, Wa8730a013g005640, Wa8730a014g001510, Wa8730a014g007120, Wa8730a015g000150, Wa8730a017g003730, Wa8730a018g001000, Wa8730a019g002070, …
GO:0006518	BP	peptide metabolic process	23/180	186/13944	2.08217e-16	5	23	4.79941e-13	Wa8730a001g008200, Wa8730a001g009730, Wa8730a001g011950, Wa8730a002g002780, Wa8730a003g002350, Wa8730a005g006590, Wa8730a006g004210, Wa8730a006g007110, Wa8730a008g001910, Wa8730a008g004400, Wa8730a009g005820, Wa8730a010g002940, Wa8730a011g005130, Wa8730a011g005920, Wa8730a013g003980, Wa8730a013g005640, Wa8730a014g001510, Wa8730a014g007120, Wa8730a015g000150, Wa8730a017g003730, Wa8730a018g001000, …
GO:0043604	BP	amide biosynthetic process	22/180	198/13944	9.50078e-15	5	22	1.64245e-11	Wa8730a001g008200, Wa8730a001g009730, Wa8730a001g011950, Wa8730a002g002780, Wa8730a003g002350, Wa8730a005g006590, Wa8730a006g004210, Wa8730a006g007110, Wa8730a008g001910, Wa8730a009g005820, Wa8730a010g002940, Wa8730a011g005130, Wa8730a011g005920, Wa8730a013g003980, Wa8730a013g005640, Wa8730a014g001510, Wa8730a014g007120, Wa8730a015g000150, Wa8730a017g003730, Wa8730a018g001000, Wa8730a019g002070, …
GO:0043603	BP	cellular amide metabolic process	23/180	259/13944	2.86278e-13	4	23	3.95923e-10	Wa8730a001g008200, Wa8730a001g009730, Wa8730a001g011950, Wa8730a002g002780, Wa8730a003g002350, Wa8730a005g006590, Wa8730a006g004210, Wa8730a006g007110, Wa8730a008g001910, Wa8730a008g004400, Wa8730a009g005820, Wa8730a010g002940, Wa8730a011g005130, Wa8730a011g005920, Wa8730a013g003980, Wa8730a013g005640, Wa8730a014g001510, Wa8730a014g007120, Wa8730a015g000150, Wa8730a017g003730, Wa8730a018g001000, …
GO:0044271	BP	cellular nitrogen compound biosynthetic process	31/180	544/13944	2.58231e-12	4	31	2.97612e-09	Wa8730a001g008200, Wa8730a001g009730, Wa8730a001g011950, Wa8730a001g012410, Wa8730a002g002780, Wa8730a003g002350, Wa8730a005g003350, Wa8730a005g006590, Wa8730a006g000440, Wa8730a006g004210, Wa8730a006g007110, Wa8730a007g009070, Wa8730a008g001910, Wa8730a009g000030, Wa8730a009g000440, Wa8730a009g004850, Wa8730a009g005820, Wa8730a010g002940, Wa8730a011g005130, Wa8730a011g005920, Wa8730a013g003980, …
GO:1901566	BP	organonitrogen compound biosynthetic process	29/180	548/13944	8.5309e-11	4	29	8.42732e-08	Wa8730a001g008200, Wa8730a001g009730, Wa8730a001g011950, Wa8730a001g012410, Wa8730a002g002780, Wa8730a003g002350, Wa8730a003g006820, Wa8730a005g006590, Wa8730a006g000440, Wa8730a006g004210, Wa8730a006g007110, Wa8730a008g001910, Wa8730a009g000030, Wa8730a009g000440, Wa8730a009g004850, Wa8730a009g005820, Wa8730a010g002940, Wa8730a011g005130, Wa8730a011g005920, Wa8730a013g003980, Wa8730a013g005640, …
GO:0002181	BP	cytoplasmic translation	9/180	33/13944	2.40634e-10	8	9	2.07998e-07	Wa8730a001g008200, Wa8730a001g009730, Wa8730a001g011950, Wa8730a006g007110, Wa8730a008g001910, Wa8730a011g005130, Wa8730a011g005920, Wa8730a015g000150, Wa8730a019g002070
GO:0042254	BP	ribosome biogenesis	15/180	182/13944	1.32405e-08	5	15	1.01731e-05	Wa8730a001g008200, Wa8730a001g009730, Wa8730a004g007750, Wa8730a005g006590, Wa8730a006g001790, Wa8730a006g004210, Wa8730a009g002470, Wa8730a010g002940, Wa8730a011g005130, Wa8730a011g005920, Wa8730a013g005640, Wa8730a014g001250, Wa8730a014g001420, Wa8730a014g007380, Wa8730a015g005990
GO:0022613	BP	ribonucleoprotein complex biogenesis	16/180	221/13944	2.71073e-08	4	16	1.87447e-05	Wa8730a001g008200, Wa8730a001g009730, Wa8730a003g002350, Wa8730a004g007750, Wa8730a005g006590, Wa8730a006g001790, Wa8730a006g004210, Wa8730a009g002470, Wa8730a010g002940, Wa8730a011g005130, Wa8730a011g005920, Wa8730a013g005640, Wa8730a014g001250, Wa8730a014g001420, Wa8730a014g007380, Wa8730a015g005990
GO:0010467	BP	gene expression	28/180	720/13944	1.57447e-07	4	28	9.89768e-05	Wa8730a001g008200, Wa8730a001g009730, Wa8730a001g011950, Wa8730a002g002780, Wa8730a003g002350, Wa8730a004g007750, Wa8730a005g006590, Wa8730a006g001790, Wa8730a006g004210, Wa8730a006g007110, Wa8730a008g001910, Wa8730a009g002470, Wa8730a009g005820, Wa8730a009g006690, Wa8730a010g002940, Wa8730a011g005130, Wa8730a011g005920, Wa8730a013g003980, Wa8730a013g005640, Wa8730a014g001420, Wa8730a014g001510, …
GO:0034645	BP	cellular macromolecule biosynthetic process	23/180	522/13944	2.62011e-07	5	23	0.000150984	Wa8730a001g008200, Wa8730a001g009730, Wa8730a001g011950, Wa8730a002g002780, Wa8730a003g002350, Wa8730a005g006590, Wa8730a006g004210, Wa8730a006g007110, Wa8730a008g001910, Wa8730a009g005820, Wa8730a010g002940, Wa8730a011g005130, Wa8730a011g005920, Wa8730a013g003980, Wa8730a013g005640, Wa8730a014g001510, Wa8730a014g007120, Wa8730a014g007380, Wa8730a015g000150, Wa8730a017g003730, Wa8730a018g001000, …
GO:0009059	BP	macromolecule biosynthetic process	23/180	569/13944	1.17582e-06	4	23	0.000625447	Wa8730a001g008200, Wa8730a001g009730, Wa8730a001g011950, Wa8730a002g002780, Wa8730a003g002350, Wa8730a005g006590, Wa8730a006g004210, Wa8730a006g007110, Wa8730a008g001910, Wa8730a009g005820, Wa8730a010g002940, Wa8730a011g005130, Wa8730a011g005920, Wa8730a013g003980, Wa8730a013g005640, Wa8730a014g001510, Wa8730a014g007120, Wa8730a014g007380, Wa8730a015g000150, Wa8730a017g003730, Wa8730a018g001000, …
GO:0034641	BP	cellular nitrogen compound metabolic process	45/180	1681/13944	1.35947e-06	3	45	0.00067148	Wa8730a001g005190, Wa8730a001g008200, Wa8730a001g009730, Wa8730a001g011950, Wa8730a001g012410, Wa8730a002g002780, Wa8730a003g002350, Wa8730a003g007960, Wa8730a004g006600, Wa8730a004g007750, Wa8730a005g003350, Wa8730a005g006590, Wa8730a006g000440, Wa8730a006g001790, Wa8730a006g004210, Wa8730a006g007110, Wa8730a007g009070, Wa8730a008g001910, Wa8730a008g004400, Wa8730a009g000030, Wa8730a009g000440, …
GO:0046686	BP	response to cadmium ion	12/180	168/13944	1.82259e-06	5	12	0.000840214	Wa8730a003g006960, Wa8730a005g005910, Wa8730a006g000470, Wa8730a008g004400, Wa8730a009g000440, Wa8730a009g004850, Wa8730a010g001790, Wa8730a013g002090, Wa8730a013g005830, Wa8730a014g000240, Wa8730a016g000680, Wa8730a016g003850
GO:0044249	BP	cellular biosynthetic process	35/180	1179/13944	2.55546e-06	3	35	0.00110444	Wa8730a001g008200, Wa8730a001g009730, Wa8730a001g011950, Wa8730a001g012410, Wa8730a002g002780, Wa8730a003g002350, Wa8730a003g006820, Wa8730a005g003350, Wa8730a005g006590, Wa8730a006g000440, Wa8730a006g004210, Wa8730a006g007110, Wa8730a007g009070, Wa8730a008g001910, Wa8730a008g003940, Wa8730a009g000030, Wa8730a009g000440, Wa8730a009g004850, Wa8730a009g005820, Wa8730a010g002940, Wa8730a011g005130, …
GO:0042273	BP	ribosomal large subunit biogenesis	7/180	49/13944	2.88957e-06	5	7	0.00117538	Wa8730a001g009730, Wa8730a005g006590, Wa8730a006g004210, Wa8730a010g002940, Wa8730a011g005130, Wa8730a011g005920, Wa8730a013g005640
GO:0042274	BP	ribosomal small subunit biogenesis	6/180	39/13944	9.75021e-06	5	6	0.00374571	Wa8730a001g008200, Wa8730a004g007750, Wa8730a009g002470, Wa8730a014g001250, Wa8730a014g001420, Wa8730a015g005990
GO:0042255	BP	ribosome assembly	6/180	43/13944	1.74561e-05	6	6	0.0063531	Wa8730a005g006590, Wa8730a006g004210, Wa8730a011g005130, Wa8730a014g001250, Wa8730a014g001420, Wa8730a015g005990
GO:0009058	BP	biosynthetic process	35/180	1302/13944	2.53029e-05	2	35	0.00874849	Wa8730a001g008200, Wa8730a001g009730, Wa8730a001g011950, Wa8730a001g012410, Wa8730a002g002780, Wa8730a003g002350, Wa8730a003g006820, Wa8730a005g003350, Wa8730a005g006590, Wa8730a006g000440, Wa8730a006g004210, Wa8730a006g007110, Wa8730a007g009070, Wa8730a008g001910, Wa8730a008g003940, Wa8730a009g000030, Wa8730a009g000440, Wa8730a009g004850, Wa8730a009g005820, Wa8730a010g002940, Wa8730a011g005130, …
GO:1901576	BP	organic substance biosynthetic process	34/180	1255/13944	3.14702e-05	3	34	0.0103627	Wa8730a001g008200, Wa8730a001g009730, Wa8730a001g011950, Wa8730a001g012410, Wa8730a002g002780, Wa8730a003g002350, Wa8730a003g006820, Wa8730a005g006590, Wa8730a006g000440, Wa8730a006g004210, Wa8730a006g007110, Wa8730a007g009070, Wa8730a008g001910, Wa8730a008g003940, Wa8730a009g000030, Wa8730a009g000440, Wa8730a009g004850, Wa8730a009g005820, Wa8730a010g002940, Wa8730a011g005130, Wa8730a011g005920, …
GO:0010035	BP	response to inorganic substance	18/180	495/13944	7.36742e-05	3	18	0.0231571	Wa8730a003g006960, Wa8730a005g005910, Wa8730a006g000470, Wa8730a006g002120, Wa8730a008g004400, Wa8730a009g000440, Wa8730a009g004850, Wa8730a010g000190, Wa8730a010g001790, Wa8730a012g004780, Wa8730a013g001150, Wa8730a013g002090, Wa8730a013g005830, Wa8730a014g000240, Wa8730a015g001060, Wa8730a015g004110, Wa8730a016g000680, Wa8730a016g003850
GO:0010038	BP	response to metal ion	12/180	249/13944	9.46944e-05	4	12	0.0284701	Wa8730a003g006960, Wa8730a005g005910, Wa8730a006g000470, Wa8730a008g004400, Wa8730a009g000440, Wa8730a009g004850, Wa8730a010g001790, Wa8730a013g002090, Wa8730a013g005830, Wa8730a014g000240, Wa8730a016g000680, Wa8730a016g003850
GO:1901564	BP	organonitrogen compound metabolic process	42/180	1781/13944	0.000104074	3	42	0.0299863	Wa8730a001g008200, Wa8730a001g009730, Wa8730a001g011950, Wa8730a001g012410, Wa8730a002g002780, Wa8730a002g004740, Wa8730a003g002350, Wa8730a003g006820, Wa8730a003g007960, Wa8730a005g005910, Wa8730a005g006590, Wa8730a006g000440, Wa8730a006g004210, Wa8730a006g005950, Wa8730a006g007110, Wa8730a007g004870, Wa8730a008g001910, Wa8730a008g003940, Wa8730a008g004400, Wa8730a009g000030, Wa8730a009g000440, …
GO:0022618	BP	ribonucleoprotein complex assembly	7/180	86/13944	0.000121028	7	7	0.0334763	Wa8730a003g002350, Wa8730a005g006590, Wa8730a006g004210, Wa8730a011g005130, Wa8730a014g001250, Wa8730a014g001420, Wa8730a015g005990
GO:0046496	BP	nicotinamide nucleotide metabolic process	5/180	39/13944	0.000136769	9	5	0.0363752	Wa8730a009g000440, Wa8730a009g004850, Wa8730a010g001790, Wa8730a013g005830, Wa8730a014g000240
GO:0071826	BP	ribonucleoprotein complex subunit organization	7/180	89/13944	0.000150246	5	7	0.0384798	Wa8730a003g002350, Wa8730a005g006590, Wa8730a006g004210, Wa8730a011g005130, Wa8730a014g001250, Wa8730a014g001420, Wa8730a015g005990
GO:0006364	BP	rRNA processing	8/180	120/13944	0.000162117	9	8	0.0400371	Wa8730a001g008200, Wa8730a004g007750, Wa8730a006g001790, Wa8730a009g002470, Wa8730a010g002940, Wa8730a011g005920, Wa8730a014g001420, Wa8730a014g007380
GO:0019362	BP	pyridine nucleotide metabolic process	5/180	42/13944	0.000195851	8	5	0.0467004	Wa8730a009g000440, Wa8730a009g004850, Wa8730a010g001790, Wa8730a013g005830, Wa8730a014g000240
GO:0016072	BP	rRNA metabolic process	8/180	124/13944	0.000203328	8	8	0.0468672	Wa8730a001g008200, Wa8730a004g007750, Wa8730a006g001790, Wa8730a009g002470, Wa8730a010g002940, Wa8730a011g005920, Wa8730a014g001420, Wa8730a014g007380
GO:0022626	CC	cytosolic ribosome	30/180	123/13944	2.51662e-30	6	30	2.70285e-27	Wa8730a001g008200, Wa8730a001g009730, Wa8730a001g011950, Wa8730a002g002780, Wa8730a003g002350, Wa8730a004g007750, Wa8730a005g006590, Wa8730a006g000470, Wa8730a006g004210, Wa8730a006g007110, Wa8730a008g001910, Wa8730a009g002470, Wa8730a009g005590, Wa8730a009g005820, Wa8730a010g002940, Wa8730a011g005130, Wa8730a011g005920, Wa8730a011g006020, Wa8730a013g003980, Wa8730a013g005640, Wa8730a014g001250, …
GO:0044391	CC	ribosomal subunit	28/180	104/13944	1.13957e-29	3	28	6.11946e-27	Wa8730a001g008200, Wa8730a001g009730, Wa8730a001g011950, Wa8730a002g002780, Wa8730a003g002350, Wa8730a004g007750, Wa8730a005g006590, Wa8730a006g004210, Wa8730a006g007110, Wa8730a008g001910, Wa8730a009g002470, Wa8730a009g005590, Wa8730a009g005820, Wa8730a010g002940, Wa8730a011g005130, Wa8730a011g005920, Wa8730a013g003980, Wa8730a013g005640, Wa8730a014g001250, Wa8730a014g001420, Wa8730a014g001510, …
GO:0005840	CC	ribosome	31/180	145/13944	2.12716e-29	5	31	7.61524e-27	Wa8730a001g008200, Wa8730a001g009730, Wa8730a001g011950, Wa8730a002g002780, Wa8730a003g002350, Wa8730a004g007750, Wa8730a005g006590, Wa8730a006g000470, Wa8730a006g004210, Wa8730a006g007110, Wa8730a008g001910, Wa8730a009g002470, Wa8730a009g005590, Wa8730a009g005820, Wa8730a010g002940, Wa8730a011g005130, Wa8730a011g005920, Wa8730a011g006020, Wa8730a013g003980, Wa8730a013g005640, Wa8730a014g001250, …
GO:0015934	CC	large ribosomal subunit	18/180	61/13944	3.38747e-20	4	18	9.09536e-18	Wa8730a001g009730, Wa8730a001g011950, Wa8730a003g002350, Wa8730a005g006590, Wa8730a006g004210, Wa8730a009g005590, Wa8730a010g002940, Wa8730a011g005130, Wa8730a011g005920, Wa8730a013g003980, Wa8730a013g005640, Wa8730a014g001510, Wa8730a014g007120, Wa8730a015g000150, Wa8730a017g002780, Wa8730a017g003730, Wa8730a019g002070, Wa8730a019g002180
GO:0022625	CC	cytosolic large ribosomal subunit	17/180	52/13944	5.28368e-20	5	17	1.13493e-17	Wa8730a001g009730, Wa8730a001g011950, Wa8730a003g002350, Wa8730a005g006590, Wa8730a006g004210, Wa8730a009g005590, Wa8730a010g002940, Wa8730a011g005130, Wa8730a011g005920, Wa8730a013g003980, Wa8730a013g005640, Wa8730a014g001510, Wa8730a014g007120, Wa8730a015g000150, Wa8730a017g002780, Wa8730a019g002070, Wa8730a019g002180
GO:1990904	CC	ribonucleoprotein complex	33/180	357/13944	3.08268e-19	2	33	5.518e-17	Wa8730a001g008200, Wa8730a001g009730, Wa8730a001g011950, Wa8730a002g002780, Wa8730a003g002350, Wa8730a004g007750, Wa8730a005g006590, Wa8730a006g000470, Wa8730a006g004210, Wa8730a006g007110, Wa8730a008g001910, Wa8730a009g002470, Wa8730a009g005590, Wa8730a009g005820, Wa8730a009g006690, Wa8730a010g002940, Wa8730a011g005130, Wa8730a011g005920, Wa8730a011g006020, Wa8730a013g003980, Wa8730a013g005640, …
GO:0042788	CC	polysomal ribosome	13/180	48/13944	2.32515e-14	6	13	3.56745e-12	Wa8730a001g008200, Wa8730a001g011950, Wa8730a004g007750, Wa8730a006g004210, Wa8730a008g001910, Wa8730a009g002470, Wa8730a009g005590, Wa8730a011g005920, Wa8730a011g006020, Wa8730a013g005640, Wa8730a014g001510, Wa8730a015g000150, Wa8730a015g005990
GO:0005844	CC	polysome	13/180	57/13944	2.6678e-13	3	13	3.58152e-11	Wa8730a001g008200, Wa8730a001g011950, Wa8730a004g007750, Wa8730a006g004210, Wa8730a008g001910, Wa8730a009g002470, Wa8730a009g005590, Wa8730a011g005920, Wa8730a011g006020, Wa8730a013g005640, Wa8730a014g001510, Wa8730a015g000150, Wa8730a015g005990
GO:0005829	CC	cytosol	46/180	1125/13944	9.86148e-13	2	46	1.1768e-10	Wa8730a001g008200, Wa8730a001g009730, Wa8730a001g011950, Wa8730a002g002780, Wa8730a002g004740, Wa8730a003g002350, Wa8730a004g002800, Wa8730a004g007750, Wa8730a004g008090, Wa8730a005g006590, Wa8730a006g000440, Wa8730a006g000470, Wa8730a006g004210, Wa8730a006g005950, Wa8730a006g007110, Wa8730a007g009070, Wa8730a008g001910, Wa8730a008g003940, Wa8730a008g004400, Wa8730a009g000440, Wa8730a009g002470, …
GO:0009536	CC	plastid	49/180	1339/13944	8.78153e-12	5	49	9.43136e-10	Wa8730a001g005190, Wa8730a001g008200, Wa8730a001g008620, Wa8730a001g012410, Wa8730a002g004740, Wa8730a002g006600, Wa8730a002g008040, Wa8730a002g008180, Wa8730a002g010430, Wa8730a003g002890, Wa8730a003g006820, Wa8730a003g006960, Wa8730a003g007960, Wa8730a005g006590, Wa8730a005g006880, Wa8730a006g000470, Wa8730a006g004210, Wa8730a008g001910, Wa8730a008g004400, Wa8730a008g005250, Wa8730a009g000030, …
GO:0022627	CC	cytosolic small ribosomal subunit	10/180	35/13944	1.38832e-11	5	10	1.3555e-09	Wa8730a001g008200, Wa8730a002g002780, Wa8730a004g007750, Wa8730a006g007110, Wa8730a008g001910, Wa8730a009g002470, Wa8730a009g005820, Wa8730a014g001250, Wa8730a014g001420, Wa8730a015g005990
GO:0009507	CC	chloroplast	47/180	1296/13944	3.65724e-11	6	47	3.27323e-09	Wa8730a001g005190, Wa8730a001g008200, Wa8730a001g008620, Wa8730a001g012410, Wa8730a002g004740, Wa8730a002g006600, Wa8730a002g008040, Wa8730a002g008180, Wa8730a002g010430, Wa8730a003g002890, Wa8730a003g006820, Wa8730a003g006960, Wa8730a003g007960, Wa8730a005g006590, Wa8730a005g006880, Wa8730a006g000470, Wa8730a006g004210, Wa8730a008g001910, Wa8730a008g004400, Wa8730a009g000030, Wa8730a009g000440, …
GO:0015935	CC	small ribosomal subunit	10/180	43/13944	1.32632e-10	4	10	1.09574e-08	Wa8730a001g008200, Wa8730a002g002780, Wa8730a004g007750, Wa8730a006g007110, Wa8730a008g001910, Wa8730a009g002470, Wa8730a009g005820, Wa8730a014g001250, Wa8730a014g001420, Wa8730a015g005990
GO:0005737	CC	cytoplasm	95/180	4342/13944	1.68823e-09	2	95	1.29512e-07	Wa8730a001g005190, Wa8730a001g008200, Wa8730a001g008620, Wa8730a001g009730, Wa8730a001g011950, Wa8730a001g012410, Wa8730a002g002780, Wa8730a002g004740, Wa8730a002g006600, Wa8730a002g008040, Wa8730a002g008180, Wa8730a002g010430, Wa8730a003g002350, Wa8730a003g002890, Wa8730a003g004610, Wa8730a003g004710, Wa8730a003g006370, Wa8730a003g006820, Wa8730a003g006960, Wa8730a003g007690, Wa8730a003g007960, …
GO:0043232	CC	intracellular non-membrane-bounded organelle	35/180	895/13944	2.89932e-09	4	35	1.94617e-07	Wa8730a001g008200, Wa8730a001g009730, Wa8730a001g011950, Wa8730a002g002780, Wa8730a003g002350, Wa8730a004g007750, Wa8730a005g003350, Wa8730a005g006590, Wa8730a006g000470, Wa8730a006g001790, Wa8730a006g004210, Wa8730a006g004520, Wa8730a006g007110, Wa8730a008g001910, Wa8730a009g002470, Wa8730a009g005590, Wa8730a009g005820, Wa8730a010g002940, Wa8730a011g005130, Wa8730a011g005920, Wa8730a011g006020, …
GO:0043228	CC	non-membrane-bounded organelle	35/180	895/13944	2.89932e-09	3	35	1.94617e-07	Wa8730a001g008200, Wa8730a001g009730, Wa8730a001g011950, Wa8730a002g002780, Wa8730a003g002350, Wa8730a004g007750, Wa8730a005g003350, Wa8730a005g006590, Wa8730a006g000470, Wa8730a006g001790, Wa8730a006g004210, Wa8730a006g004520, Wa8730a006g007110, Wa8730a008g001910, Wa8730a009g002470, Wa8730a009g005590, Wa8730a009g005820, Wa8730a010g002940, Wa8730a011g005130, Wa8730a011g005920, Wa8730a011g006020, …
GO:0009570	CC	chloroplast stroma	21/180	450/13944	3.5532e-07	3	21	2.24479e-05	Wa8730a001g005190, Wa8730a001g012410, Wa8730a002g008180, Wa8730a002g010430, Wa8730a003g006820, Wa8730a003g006960, Wa8730a005g006880, Wa8730a006g000470, Wa8730a008g004400, Wa8730a009g000440, Wa8730a009g004850, Wa8730a010g001790, Wa8730a011g005650, Wa8730a012g002080, Wa8730a013g005830, Wa8730a014g000240, Wa8730a014g001420, Wa8730a015g003300, Wa8730a015g004110, Wa8730a017g003730, Wa8730a017g003750
GO:0055044	CC	symplast	20/180	419/13944	4.82915e-07	2	20	2.64062e-05	Wa8730a001g011950, Wa8730a002g004740, Wa8730a005g006590, Wa8730a006g007110, Wa8730a008g001910, Wa8730a008g005750, Wa8730a009g000440, Wa8730a009g005590, Wa8730a009g005820, Wa8730a010g001790, Wa8730a010g002940, Wa8730a011g005130, Wa8730a013g002090, Wa8730a013g005640, Wa8730a013g005830, Wa8730a014g000240, Wa8730a014g001510, Wa8730a015g001060, Wa8730a015g005990, Wa8730a019g002180
GO:0009506	CC	plasmodesma	20/180	419/13944	4.82915e-07	5	20	2.64062e-05	Wa8730a001g011950, Wa8730a002g004740, Wa8730a005g006590, Wa8730a006g007110, Wa8730a008g001910, Wa8730a008g005750, Wa8730a009g000440, Wa8730a009g005590, Wa8730a009g005820, Wa8730a010g001790, Wa8730a010g002940, Wa8730a011g005130, Wa8730a013g002090, Wa8730a013g005640, Wa8730a013g005830, Wa8730a014g000240, Wa8730a014g001510, Wa8730a015g001060, Wa8730a015g005990, Wa8730a019g002180
GO:0009532	CC	plastid stroma	21/180	459/13944	4.91736e-07	2	21	2.64062e-05	Wa8730a001g005190, Wa8730a001g012410, Wa8730a002g008180, Wa8730a002g010430, Wa8730a003g006820, Wa8730a003g006960, Wa8730a005g006880, Wa8730a006g000470, Wa8730a008g004400, Wa8730a009g000440, Wa8730a009g004850, Wa8730a010g001790, Wa8730a011g005650, Wa8730a012g002080, Wa8730a013g005830, Wa8730a014g000240, Wa8730a014g001420, Wa8730a015g003300, Wa8730a015g004110, Wa8730a017g003730, Wa8730a017g003750
GO:0070161	CC	anchoring junction	20/180	424/13944	5.82172e-07	3	20	2.84206e-05	Wa8730a001g011950, Wa8730a002g004740, Wa8730a005g006590, Wa8730a006g007110, Wa8730a008g001910, Wa8730a008g005750, Wa8730a009g000440, Wa8730a009g005590, Wa8730a009g005820, Wa8730a010g001790, Wa8730a010g002940, Wa8730a011g005130, Wa8730a013g002090, Wa8730a013g005640, Wa8730a013g005830, Wa8730a014g000240, Wa8730a014g001510, Wa8730a015g001060, Wa8730a015g005990, Wa8730a019g002180
GO:0005911	CC	cell-cell junction	20/180	424/13944	5.82172e-07	4	20	2.84206e-05	Wa8730a001g011950, Wa8730a002g004740, Wa8730a005g006590, Wa8730a006g007110, Wa8730a008g001910, Wa8730a008g005750, Wa8730a009g000440, Wa8730a009g005590, Wa8730a009g005820, Wa8730a010g001790, Wa8730a010g002940, Wa8730a011g005130, Wa8730a013g002090, Wa8730a013g005640, Wa8730a013g005830, Wa8730a014g000240, Wa8730a014g001510, Wa8730a015g001060, Wa8730a015g005990, Wa8730a019g002180
GO:0030054	CC	cell junction	20/180	435/13944	8.69414e-07	2	20	4.05978e-05	Wa8730a001g011950, Wa8730a002g004740, Wa8730a005g006590, Wa8730a006g007110, Wa8730a008g001910, Wa8730a008g005750, Wa8730a009g000440, Wa8730a009g005590, Wa8730a009g005820, Wa8730a010g001790, Wa8730a010g002940, Wa8730a011g005130, Wa8730a013g002090, Wa8730a013g005640, Wa8730a013g005830, Wa8730a014g000240, Wa8730a014g001510, Wa8730a015g001060, Wa8730a015g005990, Wa8730a019g002180
GO:0032991	CC	protein-containing complex	37/180	1331/13944	8.14143e-06	1	37	0.000364329	Wa8730a001g008200, Wa8730a001g009730, Wa8730a001g011950, Wa8730a002g002780, Wa8730a003g002350, Wa8730a004g007750, Wa8730a005g003350, Wa8730a005g006590, Wa8730a006g000470, Wa8730a006g004210, Wa8730a006g007110, Wa8730a008g001910, Wa8730a009g000030, Wa8730a009g002470, Wa8730a009g005590, Wa8730a009g005820, Wa8730a009g006690, Wa8730a010g002940, Wa8730a011g005130, Wa8730a011g005920, Wa8730a011g006020, …
GO:0048046	CC	apoplast	10/180	146/13944	1.9475e-05	3	10	0.000836647	Wa8730a002g004740, Wa8730a003g006960, Wa8730a006g000470, Wa8730a007g009070, Wa8730a008g004400, Wa8730a009g000440, Wa8730a010g001790, Wa8730a013g002090, Wa8730a013g005830, Wa8730a017g003750
GO:0005730	CC	nucleolus	14/180	323/13944	7.78767e-05	5	14	0.00321691	Wa8730a002g002780, Wa8730a005g006590, Wa8730a006g001790, Wa8730a006g004210, Wa8730a006g007110, Wa8730a008g001910, Wa8730a009g005590, Wa8730a010g002940, Wa8730a011g005130, Wa8730a013g005640, Wa8730a014g007380, Wa8730a015g000150, Wa8730a015g005990, Wa8730a019g002070
GO:0005773	CC	vacuole	17/180	471/13944	0.000128728	5	17	0.00512053	Wa8730a002g004740, Wa8730a005g006590, Wa8730a006g004210, Wa8730a008g004400, Wa8730a008g005750, Wa8730a009g000440, Wa8730a009g005310, Wa8730a009g005590, Wa8730a011g005920, Wa8730a012g004780, Wa8730a013g005640, Wa8730a013g005830, Wa8730a015g001060, Wa8730a015g004110, Wa8730a015g005990, Wa8730a016g004300, Wa8730a019g002180
GO:0005622	CC	intracellular anatomical structure	99/180	5724/13944	0.000171557	2	99	0.00658044	Wa8730a001g005190, Wa8730a001g008200, Wa8730a001g008620, Wa8730a001g009730, Wa8730a001g011950, Wa8730a001g012410, Wa8730a002g002780, Wa8730a002g004740, Wa8730a002g006600, Wa8730a002g008040, Wa8730a002g008180, Wa8730a002g010430, Wa8730a003g002350, Wa8730a003g002890, Wa8730a003g004610, Wa8730a003g004710, Wa8730a003g006370, Wa8730a003g006820, Wa8730a003g006960, Wa8730a003g007690, Wa8730a003g007960, …
GO:0005576	CC	extracellular region	11/180	230/13944	0.000198509	2	11	0.00735168	Wa8730a002g004740, Wa8730a003g006960, Wa8730a006g000470, Wa8730a007g009070, Wa8730a008g004400, Wa8730a009g000440, Wa8730a010g001790, Wa8730a013g002090, Wa8730a013g005830, Wa8730a016g004300, Wa8730a017g003750
GO:0005886	CC	plasma membrane	30/180	1185/13944	0.000362944	3	30	0.0129934	Wa8730a001g008200, Wa8730a001g011950, Wa8730a001g012160, Wa8730a002g004740, Wa8730a002g008040, Wa8730a004g002800, Wa8730a006g002120, Wa8730a006g004210, Wa8730a007g004870, Wa8730a008g001910, Wa8730a008g003940, Wa8730a008g004400, Wa8730a008g005750, Wa8730a009g000440, Wa8730a010g001790, Wa8730a011g005130, Wa8730a011g005920, Wa8730a011g006020, Wa8730a012g002730, Wa8730a012g004780, Wa8730a013g002090, …
GO:0016020	CC	membrane	48/180	2296/13944	0.000516816	2	48	0.0179052	Wa8730a001g008200, Wa8730a001g009730, Wa8730a001g011950, Wa8730a001g012160, Wa8730a002g004740, Wa8730a002g008040, Wa8730a002g010430, Wa8730a003g006960, Wa8730a004g002800, Wa8730a004g007750, Wa8730a005g006590, Wa8730a006g000470, Wa8730a006g002120, Wa8730a006g004210, Wa8730a006g007110, Wa8730a007g004870, Wa8730a008g001910, Wa8730a008g003940, Wa8730a008g004400, Wa8730a008g005750, Wa8730a009g000440, …
GO:0071944	CC	cell periphery	33/180	1421/13944	0.00073762	2	33	0.0247564	Wa8730a001g008200, Wa8730a001g011950, Wa8730a001g012160, Wa8730a002g004740, Wa8730a002g005100, Wa8730a002g008040, Wa8730a004g002800, Wa8730a004g007750, Wa8730a006g002120, Wa8730a006g004210, Wa8730a006g004520, Wa8730a007g004870, Wa8730a008g001910, Wa8730a008g003940, Wa8730a008g004400, Wa8730a008g005750, Wa8730a009g000440, Wa8730a010g001790, Wa8730a011g005130, Wa8730a011g005920, Wa8730a011g006020, …
GO:0110165	CC	cellular anatomical entity	105/180	6407/13944	0.000889281	1	105	0.0283647	Wa8730a001g005190, Wa8730a001g008200, Wa8730a001g008620, Wa8730a001g009730, Wa8730a001g011950, Wa8730a001g012160, Wa8730a001g012410, Wa8730a002g002780, Wa8730a002g004740, Wa8730a002g005100, Wa8730a002g006600, Wa8730a002g008040, Wa8730a002g008180, Wa8730a002g010430, Wa8730a003g002350, Wa8730a003g002890, Wa8730a003g004610, Wa8730a003g004710, Wa8730a003g006370, Wa8730a003g006820, Wa8730a003g006960, …
GO:0005575	CC	cellular_component	105/180	6414/13944	0.000897951	0	105	0.0283647	Wa8730a001g005190, Wa8730a001g008200, Wa8730a001g008620, Wa8730a001g009730, Wa8730a001g011950, Wa8730a001g012160, Wa8730a001g012410, Wa8730a002g002780, Wa8730a002g004740, Wa8730a002g005100, Wa8730a002g006600, Wa8730a002g008040, Wa8730a002g008180, Wa8730a002g010430, Wa8730a003g002350, Wa8730a003g002890, Wa8730a003g004610, Wa8730a003g004710, Wa8730a003g006370, Wa8730a003g006820, Wa8730a003g006960, …
GO:0003735	MF	structural constituent of ribosome	29/180	115/13944	8.5702e-30	2	29	2.02685e-26	Wa8730a001g008200, Wa8730a001g009730, Wa8730a001g011950, Wa8730a002g002780, Wa8730a003g002350, Wa8730a004g007750, Wa8730a005g006590, Wa8730a006g004210, Wa8730a006g007110, Wa8730a008g001910, Wa8730a009g002470, Wa8730a009g005590, Wa8730a009g005820, Wa8730a010g002940, Wa8730a011g005130, Wa8730a011g005920, Wa8730a011g006020, Wa8730a013g003980, Wa8730a013g005640, Wa8730a014g001250, Wa8730a014g001420, …
GO:0005198	MF	structural molecule activity	29/180	161/13944	2.95736e-25	1	29	3.49708e-22	Wa8730a001g008200, Wa8730a001g009730, Wa8730a001g011950, Wa8730a002g002780, Wa8730a003g002350, Wa8730a004g007750, Wa8730a005g006590, Wa8730a006g004210, Wa8730a006g007110, Wa8730a008g001910, Wa8730a009g002470, Wa8730a009g005590, Wa8730a009g005820, Wa8730a010g002940, Wa8730a011g005130, Wa8730a011g005920, Wa8730a011g006020, Wa8730a013g003980, Wa8730a013g005640, Wa8730a014g001250, Wa8730a014g001420, …
GO:0003729	MF	mRNA binding	13/180	191/13944	1.15723e-06	5	13	0.000912285	Wa8730a001g008200, Wa8730a001g011950, Wa8730a002g010430, Wa8730a004g002800, Wa8730a005g006590, Wa8730a006g001790, Wa8730a008g001910, Wa8730a010g002940, Wa8730a011g005130, Wa8730a011g005920, Wa8730a013g005640, Wa8730a014g001510, Wa8730a019g002180

## Sheet: CB Dawn Up GO
Dataset S9. Enriched GO terms for SC B DEGs Upregulated at Dawn
GO	Name	Ratio in Study	Ratio in Pop.	p Value	Depth	Study Count	p Value (BH-FDR)	Study Items
GO:0009768	photosynthesis, light harvesting in photosystem I	33756	14/13944	2.01e-10	5	6	1.39e-06	Wa8730a004g004970, Wa8730a006g005790, Wa8730a007g002830, Wa8730a007g005080, Wa8730a009g000670, Wa8730a012g005370
GO:0019684	photosynthesis, light reaction	33848	72/13944	9.62e-10	4	9	2.3e-06	Wa8730a004g004970, Wa8730a006g005790, Wa8730a007g002830, Wa8730a007g005080, Wa8730a007g005200, Wa8730a009g000670, Wa8730a011g000010, Wa8730a012g005370, Wa8730a014g005170
GO:0009765	photosynthesis, light harvesting	33786	31/13944	9.98e-10	4	7	2.3e-06	Wa8730a004g004970, Wa8730a006g005790, Wa8730a007g002830, Wa8730a007g005080, Wa8730a009g000670, Wa8730a012g005370, Wa8730a014g005170
GO:0015979	photosynthesis	33848	86/13944	4.82e-09	3	9	8.33e-06	Wa8730a004g004970, Wa8730a006g005790, Wa8730a007g002830, Wa8730a007g005080, Wa8730a007g005200, Wa8730a009g000670, Wa8730a011g000010, Wa8730a012g005370, Wa8730a014g005170
GO:0015994	chlorophyll metabolic process	33756	31/13944	4.51e-08	6	6	5.33e-05	Wa8730a001g004620, Wa8730a007g000810, Wa8730a011g000010, Wa8730a014g000020, Wa8730a016g000080, Wa8730a018g003210
GO:0015995	chlorophyll biosynthetic process	33725	16/13944	4.62e-08	7	5	5.33e-05	Wa8730a001g004620, Wa8730a007g000810, Wa8730a014g000020, Wa8730a016g000080, Wa8730a018g003210
GO:0006091	generation of precursor metabolites and energy	33878	172/13944	1.89e-07	3	10	0.000187	Wa8730a004g004970, Wa8730a006g005790, Wa8730a007g002830, Wa8730a007g005080, Wa8730a007g005200, Wa8730a009g000670, Wa8730a011g000010, Wa8730a012g005370, Wa8730a014g003560, Wa8730a014g005170
GO:0006778	porphyrin-containing compound metabolic process	33756	43/13944	3.5e-07	5	6	0.000303	Wa8730a001g004620, Wa8730a007g000810, Wa8730a011g000010, Wa8730a014g000020, Wa8730a016g000080, Wa8730a018g003210
GO:0033013	tetrapyrrole metabolic process	33756	44/13944	4.04e-07	4	6	0.00031	Wa8730a001g004620, Wa8730a007g000810, Wa8730a011g000010, Wa8730a014g000020, Wa8730a016g000080, Wa8730a018g003210
GO:0009416	response to light stimulus	14/92	418/13944	5.7e-07	4	14	0.000394	Wa8730a004g004970, Wa8730a006g005790, Wa8730a006g005980, Wa8730a007g002830, Wa8730a007g005080, Wa8730a007g005200, Wa8730a007g008930, Wa8730a009g000670, Wa8730a011g000010, Wa8730a011g005630, Wa8730a012g004010, Wa8730a012g005370, Wa8730a014g005170, Wa8730a017g004030
GO:0006779	porphyrin-containing compound biosynthetic process	33725	26/13944	6.61e-07	6	5	0.000415	Wa8730a001g004620, Wa8730a007g000810, Wa8730a014g000020, Wa8730a016g000080, Wa8730a018g003210
GO:0033014	tetrapyrrole biosynthetic process	33725	28/13944	9.77e-07	5	5	0.000563	Wa8730a001g004620, Wa8730a007g000810, Wa8730a014g000020, Wa8730a016g000080, Wa8730a018g003210
GO:0009644	response to high light intensity	33756	53/13944	1.25e-06	6	6	0.000639	Wa8730a004g004970, Wa8730a006g005980, Wa8730a009g000670, Wa8730a012g005370, Wa8730a014g005170, Wa8730a017g004030
GO:0042440	pigment metabolic process	33786	84/13944	1.29e-06	2	7	0.000639	Wa8730a001g004620, Wa8730a007g000810, Wa8730a011g000010, Wa8730a011g002510, Wa8730a014g000020, Wa8730a016g000080, Wa8730a018g003210
GO:0009314	response to radiation	14/92	460/13944	1.78e-06	3	14	0.000818	Wa8730a004g004970, Wa8730a006g005790, Wa8730a006g005980, Wa8730a007g002830, Wa8730a007g005080, Wa8730a007g005200, Wa8730a007g008930, Wa8730a009g000670, Wa8730a011g000010, Wa8730a011g005630, Wa8730a012g004010, Wa8730a012g005370, Wa8730a014g005170, Wa8730a017g004030
GO:0046148	pigment biosynthetic process	33756	64/13944	3.86e-06	3	6	0.001667	Wa8730a001g004620, Wa8730a007g000810, Wa8730a011g002510, Wa8730a014g000020, Wa8730a016g000080, Wa8730a018g003210
GO:0009642	response to light intensity	33786	108/13944	7.01e-06	5	7	0.002852	Wa8730a004g004970, Wa8730a006g005980, Wa8730a007g008930, Wa8730a009g000670, Wa8730a012g005370, Wa8730a014g005170, Wa8730a017g004030
GO:0009637	response to blue light	33725	43/13944	8.85e-06	5	5	0.003399	Wa8730a007g005080, Wa8730a007g008930, Wa8730a009g000670, Wa8730a011g000010, Wa8730a017g004030
GO:0009645	response to low light intensity stimulus	33664	8/13944	1.52e-05	6	3	0.005531	Wa8730a007g008930, Wa8730a009g000670, Wa8730a012g005370
GO:0010114	response to red light	33695	31/13944	4.87e-05	6	4	0.016844	Wa8730a007g005080, Wa8730a009g000670, Wa8730a011g000010, Wa8730a017g004030
GO:0009628	response to abiotic stimulus	19/92	1086/13944	7.12e-05	2	19	0.023432	Wa8730a001g000320, Wa8730a003g004270, Wa8730a004g004780, Wa8730a004g004970, Wa8730a006g005790, Wa8730a006g005980, Wa8730a007g001450, Wa8730a007g002830, Wa8730a007g005080, Wa8730a007g005200, Wa8730a007g008930, Wa8730a009g000670, Wa8730a011g000010, Wa8730a011g005630, Wa8730a012g004010, Wa8730a012g005370, Wa8730a014g003560, Wa8730a014g005170, Wa8730a017g004030
GO:0009507	chloroplast	39/92	1296/13944	3.66e-17	6	39	3.93e-14	Wa8730a001g004620, Wa8730a002g004940, Wa8730a002g007210, Wa8730a003g004150, Wa8730a003g004270, Wa8730a004g001010, Wa8730a004g004230, Wa8730a004g004780, Wa8730a004g004970, Wa8730a005g007240, Wa8730a005g008430, Wa8730a006g002480, Wa8730a006g004860, Wa8730a006g005790, Wa8730a007g000810, Wa8730a007g001430, Wa8730a007g002830, Wa8730a007g005080, Wa8730a007g005200, Wa8730a007g006090, Wa8730a007g008930, …
GO:0009536	plastid	39/92	1339/13944	1.12e-16	5	39	6e-14	Wa8730a001g004620, Wa8730a002g004940, Wa8730a002g007210, Wa8730a003g004150, Wa8730a003g004270, Wa8730a004g001010, Wa8730a004g004230, Wa8730a004g004780, Wa8730a004g004970, Wa8730a005g007240, Wa8730a005g008430, Wa8730a006g002480, Wa8730a006g004860, Wa8730a006g005790, Wa8730a007g000810, Wa8730a007g001430, Wa8730a007g002830, Wa8730a007g005080, Wa8730a007g005200, Wa8730a007g006090, Wa8730a007g008930, …
GO:0009535	chloroplast thylakoid membrane	15/92	197/13944	2.64e-12	6	15	9.44e-10	Wa8730a001g004620, Wa8730a004g004970, Wa8730a006g005790, Wa8730a007g000810, Wa8730a007g001430, Wa8730a007g002830, Wa8730a007g005080, Wa8730a007g006090, Wa8730a008g003240, Wa8730a009g000670, Wa8730a010g004860, Wa8730a012g005370, Wa8730a014g005170, Wa8730a016g000080, Wa8730a017g004030
GO:0055035	plastid thylakoid membrane	15/92	202/13944	3.79e-12	5	15	1.02e-09	Wa8730a001g004620, Wa8730a004g004970, Wa8730a006g005790, Wa8730a007g000810, Wa8730a007g001430, Wa8730a007g002830, Wa8730a007g005080, Wa8730a007g006090, Wa8730a008g003240, Wa8730a009g000670, Wa8730a010g004860, Wa8730a012g005370, Wa8730a014g005170, Wa8730a016g000080, Wa8730a017g004030
GO:0042651	thylakoid membrane	15/92	215/13944	9.33e-12	4	15	1.79e-09	Wa8730a001g004620, Wa8730a004g004970, Wa8730a006g005790, Wa8730a007g000810, Wa8730a007g001430, Wa8730a007g002830, Wa8730a007g005080, Wa8730a007g006090, Wa8730a008g003240, Wa8730a009g000670, Wa8730a010g004860, Wa8730a012g005370, Wa8730a014g005170, Wa8730a016g000080, Wa8730a017g004030
GO:0034357	photosynthetic membrane	15/92	216/13944	9.98e-12	3	15	1.79e-09	Wa8730a001g004620, Wa8730a004g004970, Wa8730a006g005790, Wa8730a007g000810, Wa8730a007g001430, Wa8730a007g002830, Wa8730a007g005080, Wa8730a007g006090, Wa8730a008g003240, Wa8730a009g000670, Wa8730a010g004860, Wa8730a012g005370, Wa8730a014g005170, Wa8730a016g000080, Wa8730a017g004030
GO:0010287	plastoglobule	33848	53/13944	5.55e-11	2	9	8.51e-09	Wa8730a004g004970, Wa8730a006g005790, Wa8730a007g002830, Wa8730a007g005080, Wa8730a008g003240, Wa8730a009g000670, Wa8730a010g004860, Wa8730a011g000010, Wa8730a012g005370
GO:0009534	chloroplast thylakoid	15/92	247/13944	6.75e-11	5	15	9.03e-09	Wa8730a001g004620, Wa8730a004g004970, Wa8730a006g005790, Wa8730a007g000810, Wa8730a007g001430, Wa8730a007g002830, Wa8730a007g005080, Wa8730a007g006090, Wa8730a008g003240, Wa8730a009g000670, Wa8730a010g004860, Wa8730a012g005370, Wa8730a014g005170, Wa8730a016g000080, Wa8730a017g004030
GO:0031976	plastid thylakoid	15/92	249/13944	7.57e-11	4	15	9.03e-09	Wa8730a001g004620, Wa8730a004g004970, Wa8730a006g005790, Wa8730a007g000810, Wa8730a007g001430, Wa8730a007g002830, Wa8730a007g005080, Wa8730a007g006090, Wa8730a008g003240, Wa8730a009g000670, Wa8730a010g004860, Wa8730a012g005370, Wa8730a014g005170, Wa8730a016g000080, Wa8730a017g004030
GO:0009941	chloroplast envelope	16/92	353/13944	1.11e-09	5	16	1.2e-07	Wa8730a001g004620, Wa8730a004g001010, Wa8730a004g004780, Wa8730a004g004970, Wa8730a006g005790, Wa8730a007g000810, Wa8730a007g002830, Wa8730a007g005080, Wa8730a008g003240, Wa8730a009g000670, Wa8730a009g003610, Wa8730a012g005370, Wa8730a014g002390, Wa8730a014g005170, Wa8730a016g000080, Wa8730a017g001500
GO:0009579	thylakoid	15/92	306/13944	1.34e-09	3	15	1.31e-07	Wa8730a001g004620, Wa8730a004g004970, Wa8730a006g005790, Wa8730a007g000810, Wa8730a007g001430, Wa8730a007g002830, Wa8730a007g005080, Wa8730a007g006090, Wa8730a008g003240, Wa8730a009g000670, Wa8730a010g004860, Wa8730a012g005370, Wa8730a014g005170, Wa8730a016g000080, Wa8730a017g004030
GO:0009526	plastid envelope	16/92	369/13944	2.11e-09	4	16	1.89e-07	Wa8730a001g004620, Wa8730a004g001010, Wa8730a004g004780, Wa8730a004g004970, Wa8730a006g005790, Wa8730a007g000810, Wa8730a007g002830, Wa8730a007g005080, Wa8730a008g003240, Wa8730a009g000670, Wa8730a009g003610, Wa8730a012g005370, Wa8730a014g002390, Wa8730a014g005170, Wa8730a016g000080, Wa8730a017g001500
GO:0031967	organelle envelope	17/92	584/13944	2.25e-07	3	17	1.63e-05	Wa8730a001g004620, Wa8730a004g001010, Wa8730a004g004780, Wa8730a004g004970, Wa8730a006g005790, Wa8730a007g000810, Wa8730a007g002830, Wa8730a007g005080, Wa8730a008g003240, Wa8730a009g000670, Wa8730a009g003610, Wa8730a012g005370, Wa8730a014g002390, Wa8730a014g003370, Wa8730a014g005170, Wa8730a016g000080, Wa8730a017g001500
GO:0031975	envelope	17/92	584/13944	2.25e-07	2	17	1.63e-05	Wa8730a001g004620, Wa8730a004g001010, Wa8730a004g004780, Wa8730a004g004970, Wa8730a006g005790, Wa8730a007g000810, Wa8730a007g002830, Wa8730a007g005080, Wa8730a008g003240, Wa8730a009g000670, Wa8730a009g003610, Wa8730a012g005370, Wa8730a014g002390, Wa8730a014g003370, Wa8730a014g005170, Wa8730a016g000080, Wa8730a017g001500
GO:0009570	chloroplast stroma	15/92	450/13944	2.28e-07	3	15	1.63e-05	Wa8730a002g004940, Wa8730a003g004150, Wa8730a004g004970, Wa8730a006g005790, Wa8730a007g002830, Wa8730a007g005080, Wa8730a008g003240, Wa8730a008g004320, Wa8730a009g000490, Wa8730a009g000670, Wa8730a009g003610, Wa8730a010g004860, Wa8730a011g000010, Wa8730a012g001170, Wa8730a012g005370
GO:0009532	plastid stroma	15/92	459/13944	2.94e-07	2	15	1.97e-05	Wa8730a002g004940, Wa8730a003g004150, Wa8730a004g004970, Wa8730a006g005790, Wa8730a007g002830, Wa8730a007g005080, Wa8730a008g003240, Wa8730a008g004320, Wa8730a009g000490, Wa8730a009g000670, Wa8730a009g003610, Wa8730a010g004860, Wa8730a011g000010, Wa8730a012g001170, Wa8730a012g005370
GO:0031984	organelle subcompartment	16/92	679/13944	8.29e-06	2	16	0.000524	Wa8730a001g004620, Wa8730a004g004970, Wa8730a006g005790, Wa8730a007g000810, Wa8730a007g001430, Wa8730a007g002830, Wa8730a007g005080, Wa8730a007g006090, Wa8730a008g003240, Wa8730a009g000670, Wa8730a010g004860, Wa8730a010g005400, Wa8730a012g005370, Wa8730a014g005170, Wa8730a016g000080, Wa8730a017g004030
GO:0009528	plastid inner membrane	33725	43/13944	8.85e-06	5	5	0.000528	Wa8730a001g004620, Wa8730a004g001010, Wa8730a007g000810, Wa8730a009g003610, Wa8730a014g002390
GO:0005737	cytoplasm	49/92	4342/13944	1.22e-05	2	49	0.00069	Wa8730a001g000320, Wa8730a001g004620, Wa8730a002g004940, Wa8730a002g007210, Wa8730a002g010730, Wa8730a003g004150, Wa8730a003g004270, Wa8730a004g001010, Wa8730a004g004230, Wa8730a004g004780, Wa8730a004g004970, Wa8730a004g006700, Wa8730a005g007240, Wa8730a005g008430, Wa8730a006g002480, Wa8730a006g003890, Wa8730a006g004860, Wa8730a006g005790, Wa8730a006g005980, Wa8730a007g000810, Wa8730a007g001430, …
GO:0031969	chloroplast membrane	33756	82/13944	1.64e-05	5	6	0.000879	Wa8730a001g004620, Wa8730a004g001010, Wa8730a004g004780, Wa8730a007g000810, Wa8730a009g003610, Wa8730a014g002390
GO:0042170	plastid membrane	33756	90/13944	2.79e-05	4	6	0.001428	Wa8730a001g004620, Wa8730a004g001010, Wa8730a004g004780, Wa8730a007g000810, Wa8730a009g003610, Wa8730a014g002390
GO:0009706	chloroplast inner membrane	33695	39/13944	0.000122	6	4	0.005971	Wa8730a001g004620, Wa8730a007g000810, Wa8730a009g003610, Wa8730a014g002390
GO:0019866	organelle inner membrane	33756	167/13944	0.000822	4	6	0.038396	Wa8730a001g004620, Wa8730a004g001010, Wa8730a007g000810, Wa8730a009g003610, Wa8730a014g002390, Wa8730a014g003370
GO:0031409	pigment binding	33756	13/13944	1.16e-10	2	6	2.73e-07	Wa8730a004g004970, Wa8730a006g005790, Wa8730a007g002830, Wa8730a007g005080, Wa8730a009g000670, Wa8730a012g005370
GO:0016168	chlorophyll binding	33756	16/13944	5.31e-10	4	6	6.28e-07	Wa8730a004g004970, Wa8730a006g005790, Wa8730a007g002830, Wa8730a007g005080, Wa8730a009g000670, Wa8730a012g005370
GO:0046906	tetrapyrrole binding	33756	27/13944	1.85e-08	3	6	1.46e-05	Wa8730a004g004970, Wa8730a006g005790, Wa8730a007g002830, Wa8730a007g005080, Wa8730a009g000670, Wa8730a012g005370

## Sheet: CB Dusk Up GO
Dataset S9. Enriched GO terms for SC B DEGs Upregulated at Dusk
GO	Name	Ratio in Study	Ratio in Pop.	p Value	Depth	Study Count	p Value (BH-FDR)	Study Items
GO:0009536	plastid	23/73	1339/13944	1.65903e-07	5	23	0.000178179	Wa8730a001g012410, Wa8730a002g004740, Wa8730a002g006600, Wa8730a002g008040, Wa8730a002g008180, Wa8730a002g010430, Wa8730a003g002890, Wa8730a003g006820, Wa8730a005g006880, Wa8730a008g001910, Wa8730a008g004400, Wa8730a008g005250, Wa8730a009g004850, Wa8730a009g006980, Wa8730a010g000090, Wa8730a010g002220, Wa8730a011g005650, Wa8730a013g005640, Wa8730a014g000240, Wa8730a015g005480, Wa8730a019g002180, …
GO:0009507	chloroplast	21/73	1296/13944	1.76518e-06	6	21	0.000947903	Wa8730a001g012410, Wa8730a002g004740, Wa8730a002g006600, Wa8730a002g008040, Wa8730a002g008180, Wa8730a002g010430, Wa8730a003g002890, Wa8730a003g006820, Wa8730a005g006880, Wa8730a008g001910, Wa8730a008g004400, Wa8730a009g004850, Wa8730a009g006980, Wa8730a010g000090, Wa8730a010g002220, Wa8730a011g005650, Wa8730a013g005640, Wa8730a014g000240, Wa8730a015g005480, Wa8730a019g002180, Wa8730a020g001790
GO:0022626	cytosolic ribosome	7/73	123/13944	3.52109e-06	6	7	0.00126055	Wa8730a008g001910, Wa8730a009g002470, Wa8730a009g005590, Wa8730a011g006020, Wa8730a013g003980, Wa8730a013g005640, Wa8730a019g002180
GO:0042788	polysomal ribosome	5/73	48/13944	4.91851e-06	6	5	0.00132062	Wa8730a008g001910, Wa8730a009g002470, Wa8730a009g005590, Wa8730a011g006020, Wa8730a013g005640
GO:0005840	ribosome	7/73	145/13944	1.0445e-05	5	7	0.00207559	Wa8730a008g001910, Wa8730a009g002470, Wa8730a009g005590, Wa8730a011g006020, Wa8730a013g003980, Wa8730a013g005640, Wa8730a019g002180
GO:0005844	polysome	5/73	57/13944	1.15955e-05	3	5	0.00207559	Wa8730a008g001910, Wa8730a009g002470, Wa8730a009g005590, Wa8730a011g006020, Wa8730a013g005640
GO:0044391	ribosomal subunit	6/73	104/13944	1.69086e-05	3	6	0.00259426	Wa8730a008g001910, Wa8730a009g002470, Wa8730a009g005590, Wa8730a013g003980, Wa8730a013g005640, Wa8730a019g002180
GO:0005829	cytosol	17/73	1125/13944	5.32636e-05	2	17	0.00715063	Wa8730a002g004740, Wa8730a004g006170, Wa8730a006g000440, Wa8730a006g005950, Wa8730a008g001910, Wa8730a008g003940, Wa8730a008g004400, Wa8730a009g002470, Wa8730a009g005590, Wa8730a009g006980, Wa8730a011g005650, Wa8730a011g006020, Wa8730a013g003980, Wa8730a013g005640, Wa8730a014g000240, Wa8730a016g003850, Wa8730a019g002180
GO:0005737	cytoplasm	39/73	4342/13944	0.0001061	2	39	0.0126613	Wa8730a001g012410, Wa8730a002g004740, Wa8730a002g006600, Wa8730a002g008040, Wa8730a002g008180, Wa8730a002g010430, Wa8730a003g002890, Wa8730a003g006820, Wa8730a003g007690, Wa8730a004g006170, Wa8730a005g003350, Wa8730a005g005910, Wa8730a005g006880, Wa8730a006g000440, Wa8730a006g005950, Wa8730a006g006940, Wa8730a008g001910, Wa8730a008g003940, Wa8730a008g004400, Wa8730a008g005250, Wa8730a009g002470, …
GO:0022625	cytosolic large ribosomal subunit	4/73	52/13944	0.000154767	5	4	0.016622	Wa8730a009g005590, Wa8730a013g003980, Wa8730a013g005640, Wa8730a019g002180
GO:0015934	large ribosomal subunit	4/73	61/13944	0.000287926	4	4	0.0281121	Wa8730a009g005590, Wa8730a013g003980, Wa8730a013g005640, Wa8730a019g002180
GO:0009570	chloroplast stroma	9/73	450/13944	0.000544874	3	9	0.0487662	Wa8730a001g012410, Wa8730a002g008180, Wa8730a002g010430, Wa8730a003g006820, Wa8730a005g006880, Wa8730a008g004400, Wa8730a009g004850, Wa8730a011g005650, Wa8730a014g000240
GO:0003735	structural constituent of ribosome	7/73	115/13944	2.24537e-06	2	7	0.00531031	Wa8730a008g001910, Wa8730a009g002470, Wa8730a009g005590, Wa8730a011g006020, Wa8730a013g003980, Wa8730a013g005640, Wa8730a019g002180
GO:0005198	structural molecule activity	7/73	161/13944	2.06406e-05	1	7	0.0244075	Wa8730a008g001910, Wa8730a009g002470, Wa8730a009g005590, Wa8730a011g006020, Wa8730a013g003980, Wa8730a013g005640, Wa8730a019g002180

## Sheet: CC Dawn Up GO
Dataset S9. Enriched GO terms for SC C DEGs Upregulated at Dawn
GO	Name	Ratio in Study	Ratio in Pop.	p Value	Depth	Study Count	p Value (BH-FDR)	Study Items
GO:0009768	photosynthesis, light harvesting in photosystem I	30956	14/13944	3.55e-20	5	10	2.46e-16	Wa8730a001g008310, Wa8730a004g004970, Wa8730a006g005790, Wa8730a007g002830, Wa8730a007g005080, Wa8730a009g000130, Wa8730a009g000670, Wa8730a009g005910, Wa8730a012g000440, Wa8730a012g005370
GO:0009765	photosynthesis, light harvesting	31017	31/13944	1.3e-19	4	12	4.48e-16	Wa8730a001g008310, Wa8730a003g006530, Wa8730a004g004970, Wa8730a006g005790, Wa8730a007g002830, Wa8730a007g005080, Wa8730a009g000130, Wa8730a009g000670, Wa8730a009g005910, Wa8730a012g000440, Wa8730a012g005370, Wa8730a014g005170
GO:0019684	photosynthesis, light reaction	13/84	72/13944	2.79e-16	4	13	6.42e-13	Wa8730a001g008310, Wa8730a003g006530, Wa8730a004g004970, Wa8730a006g005790, Wa8730a007g002830, Wa8730a007g005080, Wa8730a007g005200, Wa8730a009g000130, Wa8730a009g000670, Wa8730a009g005910, Wa8730a012g000440, Wa8730a012g005370, Wa8730a014g005170
GO:0015979	photosynthesis	13/84	86/13944	3.2e-15	3	13	5.53e-12	Wa8730a001g008310, Wa8730a003g006530, Wa8730a004g004970, Wa8730a006g005790, Wa8730a007g002830, Wa8730a007g005080, Wa8730a007g005200, Wa8730a009g000130, Wa8730a009g000670, Wa8730a009g005910, Wa8730a012g000440, Wa8730a012g005370, Wa8730a014g005170
GO:0009644	response to high light intensity	30926	53/13944	2.41e-11	6	9	3.27e-08	Wa8730a001g008310, Wa8730a003g006530, Wa8730a004g004970, Wa8730a006g005980, Wa8730a009g000670, Wa8730a009g005910, Wa8730a012g005370, Wa8730a014g005170, Wa8730a017g004030
GO:0006091	generation of precursor metabolites and energy	13/84	172/13944	2.84e-11	3	13	3.27e-08	Wa8730a001g008310, Wa8730a003g006530, Wa8730a004g004970, Wa8730a006g005790, Wa8730a007g002830, Wa8730a007g005080, Wa8730a007g005200, Wa8730a009g000130, Wa8730a009g000670, Wa8730a009g005910, Wa8730a012g000440, Wa8730a012g005370, Wa8730a014g005170
GO:0009416	response to light stimulus	18/84	418/13944	4.11e-11	4	18	3.59e-08	Wa8730a001g008310, Wa8730a002g007540, Wa8730a003g006530, Wa8730a004g004970, Wa8730a006g003620, Wa8730a006g005790, Wa8730a006g005980, Wa8730a007g002830, Wa8730a007g005080, Wa8730a007g005200, Wa8730a007g008930, Wa8730a009g000130, Wa8730a009g000670, Wa8730a009g005910, Wa8730a012g004010, Wa8730a012g005370, Wa8730a014g005170, Wa8730a017g004030
GO:0009642	response to light intensity	30987	108/13944	4.15e-11	5	11	3.59e-08	Wa8730a001g008310, Wa8730a002g007540, Wa8730a003g006530, Wa8730a004g004970, Wa8730a006g005980, Wa8730a007g008930, Wa8730a009g000670, Wa8730a009g005910, Wa8730a012g005370, Wa8730a014g005170, Wa8730a017g004030
GO:0009314	response to radiation	18/84	460/13944	1.96e-10	3	18	1.51e-07	Wa8730a001g008310, Wa8730a002g007540, Wa8730a003g006530, Wa8730a004g004970, Wa8730a006g003620, Wa8730a006g005790, Wa8730a006g005980, Wa8730a007g002830, Wa8730a007g005080, Wa8730a007g005200, Wa8730a007g008930, Wa8730a009g000130, Wa8730a009g000670, Wa8730a009g005910, Wa8730a012g004010, Wa8730a012g005370, Wa8730a014g005170, Wa8730a017g004030
GO:0009645	response to low light intensity stimulus	30803	8/13944	3.88e-10	6	5	2.68e-07	Wa8730a001g008310, Wa8730a007g008930, Wa8730a009g000670, Wa8730a009g005910, Wa8730a012g005370
GO:0010218	response to far red light	30834	27/13944	1.07e-08	6	6	6.7e-06	Wa8730a002g007540, Wa8730a007g005080, Wa8730a009g000130, Wa8730a009g000670, Wa8730a009g005910, Wa8730a017g004030
GO:0010114	response to red light	30834	31/13944	2.6e-08	6	6	1.5e-05	Wa8730a002g007540, Wa8730a007g005080, Wa8730a009g000130, Wa8730a009g000670, Wa8730a009g005910, Wa8730a017g004030
GO:0009637	response to blue light	30834	43/13944	2.03e-07	5	6	0.000108	Wa8730a007g005080, Wa8730a007g008930, Wa8730a009g000130, Wa8730a009g000670, Wa8730a009g005910, Wa8730a017g004030
GO:0009628	response to abiotic stimulus	22/84	1086/13944	2.89e-07	2	22	0.000143	Wa8730a001g000320, Wa8730a001g003580, Wa8730a001g008310, Wa8730a002g007540, Wa8730a003g006530, Wa8730a004g004780, Wa8730a004g004970, Wa8730a006g003620, Wa8730a006g005790, Wa8730a006g005980, Wa8730a007g002830, Wa8730a007g005080, Wa8730a007g005200, Wa8730a007g008930, Wa8730a009g000130, Wa8730a009g000670, Wa8730a009g005910, Wa8730a009g006790, Wa8730a012g004010, Wa8730a012g005370, Wa8730a014g005170, …
GO:0009639	response to red or far red light	30864	97/13944	1.85e-06	5	7	0.000854	Wa8730a002g007540, Wa8730a006g003620, Wa8730a007g005080, Wa8730a009g000130, Wa8730a009g000670, Wa8730a009g005910, Wa8730a017g004030
GO:1901617	organic hydroxy compound biosynthetic process	30834	101/13944	3.2e-05	4	6	0.013838	Wa8730a006g003620, Wa8730a006g005980, Wa8730a009g006790, Wa8730a014g002390, Wa8730a016g000080, Wa8730a017g001500
GO:0009769	photosynthesis, light harvesting in photosystem II	30713	2/13944	3.59e-05	5	2	0.014587	Wa8730a004g004970, Wa8730a009g005910
GO:0071492	cellular response to UV-A	30713	3/13944	0.000107	8	2	0.038586	Wa8730a003g006530, Wa8730a017g004030
GO:0070141	response to UV-A	30713	3/13944	0.000107	6	2	0.038586	Wa8730a003g006530, Wa8730a017g004030
GO:0015995	chlorophyll biosynthetic process	30742	16/13944	0.000112	7	3	0.038586	Wa8730a001g004620, Wa8730a014g000020, Wa8730a016g000080
GO:0042440	pigment metabolic process	30803	84/13944	0.00015	2	5	0.049242	Wa8730a001g004620, Wa8730a002g007540, Wa8730a011g002510, Wa8730a014g000020, Wa8730a016g000080
GO:0009507	chloroplast	37/84	1296/13944	5.07e-17	6	37	5.45e-14	Wa8730a001g001940, Wa8730a001g004620, Wa8730a001g008310, Wa8730a002g004940, Wa8730a002g005400, Wa8730a002g007210, Wa8730a003g004150, Wa8730a003g006530, Wa8730a004g002900, Wa8730a004g003590, Wa8730a004g004780, Wa8730a004g004970, Wa8730a006g002480, Wa8730a006g004860, Wa8730a006g005790, Wa8730a007g001430, Wa8730a007g002830, Wa8730a007g005080, Wa8730a007g005200, Wa8730a007g008930, Wa8730a008g003240, …
GO:0009536	plastid	37/84	1339/13944	1.48e-16	5	37	7.93e-14	Wa8730a001g001940, Wa8730a001g004620, Wa8730a001g008310, Wa8730a002g004940, Wa8730a002g005400, Wa8730a002g007210, Wa8730a003g004150, Wa8730a003g006530, Wa8730a004g002900, Wa8730a004g003590, Wa8730a004g004780, Wa8730a004g004970, Wa8730a006g002480, Wa8730a006g004860, Wa8730a006g005790, Wa8730a007g001430, Wa8730a007g002830, Wa8730a007g005080, Wa8730a007g005200, Wa8730a007g008930, Wa8730a008g003240, …
GO:0034357	photosynthetic membrane	17/84	216/13944	9.26e-15	3	17	3.31e-12	Wa8730a001g004620, Wa8730a001g008310, Wa8730a003g006530, Wa8730a004g004970, Wa8730a006g005790, Wa8730a007g001430, Wa8730a007g002830, Wa8730a007g005080, Wa8730a008g003240, Wa8730a009g000130, Wa8730a009g000670, Wa8730a009g005910, Wa8730a012g000440, Wa8730a012g005370, Wa8730a014g005170, Wa8730a016g000080, Wa8730a017g004030
GO:0009535	chloroplast thylakoid membrane	16/84	197/13944	3.76e-14	6	16	1.01e-11	Wa8730a001g004620, Wa8730a001g008310, Wa8730a003g006530, Wa8730a004g004970, Wa8730a006g005790, Wa8730a007g001430, Wa8730a007g002830, Wa8730a007g005080, Wa8730a008g003240, Wa8730a009g000130, Wa8730a009g000670, Wa8730a009g005910, Wa8730a012g005370, Wa8730a014g005170, Wa8730a016g000080, Wa8730a017g004030
GO:0055035	plastid thylakoid membrane	16/84	202/13944	5.57e-14	5	16	1.2e-11	Wa8730a001g004620, Wa8730a001g008310, Wa8730a003g006530, Wa8730a004g004970, Wa8730a006g005790, Wa8730a007g001430, Wa8730a007g002830, Wa8730a007g005080, Wa8730a008g003240, Wa8730a009g000130, Wa8730a009g000670, Wa8730a009g005910, Wa8730a012g005370, Wa8730a014g005170, Wa8730a016g000080, Wa8730a017g004030
GO:0009534	chloroplast thylakoid	17/84	247/13944	8.52e-14	5	17	1.49e-11	Wa8730a001g004620, Wa8730a001g008310, Wa8730a003g006530, Wa8730a004g002900, Wa8730a004g004970, Wa8730a006g005790, Wa8730a007g001430, Wa8730a007g002830, Wa8730a007g005080, Wa8730a008g003240, Wa8730a009g000130, Wa8730a009g000670, Wa8730a009g005910, Wa8730a012g005370, Wa8730a014g005170, Wa8730a016g000080, Wa8730a017g004030
GO:0031976	plastid thylakoid	17/84	249/13944	9.73e-14	4	17	1.49e-11	Wa8730a001g004620, Wa8730a001g008310, Wa8730a003g006530, Wa8730a004g002900, Wa8730a004g004970, Wa8730a006g005790, Wa8730a007g001430, Wa8730a007g002830, Wa8730a007g005080, Wa8730a008g003240, Wa8730a009g000130, Wa8730a009g000670, Wa8730a009g005910, Wa8730a012g005370, Wa8730a014g005170, Wa8730a016g000080, Wa8730a017g004030
GO:0042651	thylakoid membrane	16/84	215/13944	1.48e-13	4	16	1.98e-11	Wa8730a001g004620, Wa8730a001g008310, Wa8730a003g006530, Wa8730a004g004970, Wa8730a006g005790, Wa8730a007g001430, Wa8730a007g002830, Wa8730a007g005080, Wa8730a008g003240, Wa8730a009g000130, Wa8730a009g000670, Wa8730a009g005910, Wa8730a012g005370, Wa8730a014g005170, Wa8730a016g000080, Wa8730a017g004030
GO:0009579	thylakoid	18/84	306/13944	2.18e-13	3	18	2.6e-11	Wa8730a001g004620, Wa8730a001g008310, Wa8730a003g006530, Wa8730a004g002900, Wa8730a004g004970, Wa8730a006g005790, Wa8730a007g001430, Wa8730a007g002830, Wa8730a007g005080, Wa8730a008g003240, Wa8730a009g000130, Wa8730a009g000670, Wa8730a009g005910, Wa8730a012g000440, Wa8730a012g005370, Wa8730a014g005170, Wa8730a016g000080, Wa8730a017g004030
GO:0010287	plastoglobule	30956	53/13944	5.73e-13	2	10	6.15e-11	Wa8730a001g008310, Wa8730a004g004970, Wa8730a006g005790, Wa8730a007g002830, Wa8730a007g005080, Wa8730a008g003240, Wa8730a009g000130, Wa8730a009g000670, Wa8730a009g005910, Wa8730a012g005370
GO:0009941	chloroplast envelope	18/84	353/13944	2.46e-12	5	18	2.41e-10	Wa8730a001g004620, Wa8730a001g008310, Wa8730a004g002900, Wa8730a004g004780, Wa8730a004g004970, Wa8730a006g005790, Wa8730a007g002830, Wa8730a007g005080, Wa8730a008g003240, Wa8730a009g000130, Wa8730a009g000670, Wa8730a009g003610, Wa8730a009g005910, Wa8730a012g005370, Wa8730a014g002390, Wa8730a014g005170, Wa8730a016g000080, Wa8730a017g001500
GO:0009526	plastid envelope	18/84	369/13944	5.19e-12	4	18	4.64e-10	Wa8730a001g004620, Wa8730a001g008310, Wa8730a004g002900, Wa8730a004g004780, Wa8730a004g004970, Wa8730a006g005790, Wa8730a007g002830, Wa8730a007g005080, Wa8730a008g003240, Wa8730a009g000130, Wa8730a009g000670, Wa8730a009g003610, Wa8730a009g005910, Wa8730a012g005370, Wa8730a014g002390, Wa8730a014g005170, Wa8730a016g000080, Wa8730a017g001500
GO:0009570	chloroplast stroma	19/84	450/13944	1.52e-11	3	19	1.26e-09	Wa8730a001g001940, Wa8730a001g008310, Wa8730a002g004940, Wa8730a003g004150, Wa8730a004g002900, Wa8730a004g003590, Wa8730a004g004970, Wa8730a006g005790, Wa8730a007g002830, Wa8730a007g005080, Wa8730a008g003240, Wa8730a008g004320, Wa8730a009g000130, Wa8730a009g000490, Wa8730a009g000670, Wa8730a009g003610, Wa8730a009g005910, Wa8730a012g001170, Wa8730a012g005370
GO:0009532	plastid stroma	19/84	459/13944	2.14e-11	2	19	1.65e-09	Wa8730a001g001940, Wa8730a001g008310, Wa8730a002g004940, Wa8730a003g004150, Wa8730a004g002900, Wa8730a004g003590, Wa8730a004g004970, Wa8730a006g005790, Wa8730a007g002830, Wa8730a007g005080, Wa8730a008g003240, Wa8730a008g004320, Wa8730a009g000130, Wa8730a009g000490, Wa8730a009g000670, Wa8730a009g003610, Wa8730a009g005910, Wa8730a012g001170, Wa8730a012g005370
GO:0031984	organelle subcompartment	20/84	679/13944	2.42e-09	2	20	1.73e-07	Wa8730a001g004620, Wa8730a001g008310, Wa8730a003g006530, Wa8730a004g002900, Wa8730a004g004970, Wa8730a006g003620, Wa8730a006g005790, Wa8730a007g001430, Wa8730a007g002830, Wa8730a007g005080, Wa8730a008g003240, Wa8730a009g000130, Wa8730a009g000670, Wa8730a009g005910, Wa8730a010g005400, Wa8730a012g005370, Wa8730a014g001120, Wa8730a014g005170, Wa8730a016g000080, Wa8730a017g004030
GO:0031967	organelle envelope	18/84	584/13944	8.73e-09	3	18	5.51e-07	Wa8730a001g004620, Wa8730a001g008310, Wa8730a004g002900, Wa8730a004g004780, Wa8730a004g004970, Wa8730a006g005790, Wa8730a007g002830, Wa8730a007g005080, Wa8730a008g003240, Wa8730a009g000130, Wa8730a009g000670, Wa8730a009g003610, Wa8730a009g005910, Wa8730a012g005370, Wa8730a014g002390, Wa8730a014g005170, Wa8730a016g000080, Wa8730a017g001500
GO:0031975	envelope	18/84	584/13944	8.73e-09	2	18	5.51e-07	Wa8730a001g004620, Wa8730a001g008310, Wa8730a004g002900, Wa8730a004g004780, Wa8730a004g004970, Wa8730a006g005790, Wa8730a007g002830, Wa8730a007g005080, Wa8730a008g003240, Wa8730a009g000130, Wa8730a009g000670, Wa8730a009g003610, Wa8730a009g005910, Wa8730a012g005370, Wa8730a014g002390, Wa8730a014g005170, Wa8730a016g000080, Wa8730a017g001500
GO:0005737	cytoplasm	48/84	4342/13944	1.19e-06	2	48	7.09e-05	Wa8730a001g000320, Wa8730a001g001940, Wa8730a001g003580, Wa8730a001g004620, Wa8730a001g008310, Wa8730a002g004940, Wa8730a002g005400, Wa8730a002g007210, Wa8730a002g009470, Wa8730a003g004150, Wa8730a003g006530, Wa8730a004g002900, Wa8730a004g003590, Wa8730a004g004780, Wa8730a004g004970, Wa8730a006g002480, Wa8730a006g003620, Wa8730a006g003890, Wa8730a006g004860, Wa8730a006g005790, Wa8730a006g005980, …
GO:0009521	photosystem	30742	8/13944	1.16e-05	3	3	0.000653	Wa8730a007g005080, Wa8730a009g005910, Wa8730a012g000440
GO:0030076	light-harvesting complex	30713	2/13944	3.59e-05	2	2	0.001751	Wa8730a007g005080, Wa8730a009g005910
GO:0009503	thylakoid light-harvesting complex	30713	2/13944	3.59e-05	4	2	0.001751	Wa8730a007g005080, Wa8730a009g005910
GO:0009517	PSII associated light-harvesting complex II	30713	2/13944	3.59e-05	5	2	0.001751	Wa8730a007g005080, Wa8730a009g005910
GO:0016020	membrane	28/84	2296/13944	0.000153	2	28	0.007139	Wa8730a001g001940, Wa8730a001g003580, Wa8730a001g004620, Wa8730a001g008310, Wa8730a003g006530, Wa8730a004g003590, Wa8730a004g004780, Wa8730a004g004970, Wa8730a006g003620, Wa8730a006g005790, Wa8730a007g001430, Wa8730a007g002830, Wa8730a007g005080, Wa8730a007g005200, Wa8730a008g003240, Wa8730a008g003840, Wa8730a009g000130, Wa8730a009g000670, Wa8730a009g003610, Wa8730a009g005910, Wa8730a010g005400, …
GO:0009523	photosystem II	30713	4/13944	0.000213	4	2	0.009553	Wa8730a007g005080, Wa8730a009g005910
GO:0009522	photosystem I	30713	5/13944	0.000354	4	2	0.015225	Wa8730a009g005910, Wa8730a012g000440
GO:0043231	intracellular membrane-bounded organelle	45/84	4838/13944	0.000481	4	45	0.019867	Wa8730a001g001940, Wa8730a001g003580, Wa8730a001g004620, Wa8730a001g008310, Wa8730a002g004940, Wa8730a002g005400, Wa8730a002g007210, Wa8730a002g007540, Wa8730a003g004150, Wa8730a003g006530, Wa8730a004g002900, Wa8730a004g003590, Wa8730a004g004780, Wa8730a004g004970, Wa8730a005g003400, Wa8730a006g002480, Wa8730a006g003620, Wa8730a006g004860, Wa8730a006g005790, Wa8730a006g005980, Wa8730a007g001430, …
GO:0005622	intracellular anatomical structure	50/84	5724/13944	0.000756	2	50	0.030004	Wa8730a001g000320, Wa8730a001g001940, Wa8730a001g003580, Wa8730a001g004620, Wa8730a001g008310, Wa8730a002g004940, Wa8730a002g005400, Wa8730a002g007210, Wa8730a002g007540, Wa8730a002g009470, Wa8730a003g004150, Wa8730a003g006530, Wa8730a004g002900, Wa8730a004g003590, Wa8730a004g004780, Wa8730a004g004970, Wa8730a005g003400, Wa8730a006g002480, Wa8730a006g003620, Wa8730a006g003890, Wa8730a006g004860, …
GO:0043227	membrane-bounded organelle	45/84	4920/13944	0.000782	3	45	0.030004	Wa8730a001g001940, Wa8730a001g003580, Wa8730a001g004620, Wa8730a001g008310, Wa8730a002g004940, Wa8730a002g005400, Wa8730a002g007210, Wa8730a002g007540, Wa8730a003g004150, Wa8730a003g006530, Wa8730a004g002900, Wa8730a004g003590, Wa8730a004g004780, Wa8730a004g004970, Wa8730a005g003400, Wa8730a006g002480, Wa8730a006g003620, Wa8730a006g004860, Wa8730a006g005790, Wa8730a006g005980, Wa8730a007g001430, …
GO:0043229	intracellular organelle	45/84	5066/13944	0.001338	3	45	0.049222	Wa8730a001g001940, Wa8730a001g003580, Wa8730a001g004620, Wa8730a001g008310, Wa8730a002g004940, Wa8730a002g005400, Wa8730a002g007210, Wa8730a002g007540, Wa8730a003g004150, Wa8730a003g006530, Wa8730a004g002900, Wa8730a004g003590, Wa8730a004g004780, Wa8730a004g004970, Wa8730a005g003400, Wa8730a006g002480, Wa8730a006g003620, Wa8730a006g004860, Wa8730a006g005790, Wa8730a006g005980, Wa8730a007g001430, …
GO:0043226	organelle	45/84	5081/13944	0.001375	2	45	0.049222	Wa8730a001g001940, Wa8730a001g003580, Wa8730a001g004620, Wa8730a001g008310, Wa8730a002g004940, Wa8730a002g005400, Wa8730a002g007210, Wa8730a002g007540, Wa8730a003g004150, Wa8730a003g006530, Wa8730a004g002900, Wa8730a004g003590, Wa8730a004g004780, Wa8730a004g004970, Wa8730a005g003400, Wa8730a006g002480, Wa8730a006g003620, Wa8730a006g004860, Wa8730a006g005790, Wa8730a006g005980, Wa8730a007g001430, …
GO:0016168	chlorophyll binding	30956	16/13944	2.81e-19	4	10	6.65e-16	Wa8730a001g008310, Wa8730a003g006530, Wa8730a004g004970, Wa8730a006g005790, Wa8730a007g002830, Wa8730a007g005080, Wa8730a009g000130, Wa8730a009g000670, Wa8730a009g005910, Wa8730a012g005370
GO:0031409	pigment binding	30926	13/13944	4.71e-18	2	9	5.57e-15	Wa8730a001g008310, Wa8730a004g004970, Wa8730a006g005790, Wa8730a007g002830, Wa8730a007g005080, Wa8730a009g000130, Wa8730a009g000670, Wa8730a009g005910, Wa8730a012g005370
GO:0046906	tetrapyrrole binding	30956	27/13944	2.81e-16	3	10	2.22e-13	Wa8730a001g008310, Wa8730a003g006530, Wa8730a004g004970, Wa8730a006g005790, Wa8730a007g002830, Wa8730a007g005080, Wa8730a009g000130, Wa8730a009g000670, Wa8730a009g005910, Wa8730a012g005370
GO:0019904	protein domain specific binding	30864	53/13944	2.75e-08	3	7	1.63e-05	Wa8730a001g008310, Wa8730a004g004970, Wa8730a007g005080, Wa8730a009g000130, Wa8730a009g000670, Wa8730a009g005910, Wa8730a012g005370
GO:0043168	anion binding	30987	298/13944	1.64e-06	3	11	0.000776	Wa8730a001g008310, Wa8730a002g005400, Wa8730a003g006530, Wa8730a004g004970, Wa8730a006g005790, Wa8730a007g002830, Wa8730a007g005080, Wa8730a009g000130, Wa8730a009g000670, Wa8730a009g005910, Wa8730a012g005370
GO:0043167	ion binding	31017	537/13944	8.48e-05	2	12	0.033419	Wa8730a001g000320, Wa8730a001g008310, Wa8730a002g005400, Wa8730a003g006530, Wa8730a004g004970, Wa8730a006g005790, Wa8730a007g002830, Wa8730a007g005080, Wa8730a009g000130, Wa8730a009g000670, Wa8730a009g005910, Wa8730a012g005370

[truncated: 3 more sheets: CC Dusk Up GO, CD Dawn Up GO, TOD Responsive Genes]
