# Supplementary material for: Streamlined spatial and environmental expression signatures characterize the minimalist duckweedWolffia australiana
Source: HighWire-hosted journal article supplement (doi:10.1101/gr.279091.124), 2024-07-01
Supplement: Supplemental_Dataset_S10.xlsx [file Supplemental_Dataset_S10.xlsx]

## Sheet: Wolffia Gene Orthologues
Dataset S10. Wolffia gene orthologues in model plants. Syntenic orthologues across eleven key species
Column M identifies top gene orthology (GO) terms associated with these families
Orthology determined with ‘Orthofinder’ (Emms and Kelly, 2019). See Methods
Orthogroups	Wolffia	Arabidopsis	Banana	Camphor	Coconut	Lemna	Rice	Soy	Maize	Zostera	Gos	Description
OG0000022	Wa8730a001g000010	.	.	.	.	.	.	.	.	.
OG0000024	Wa8730a001g000020	AT1G56690.1,AT3G12770.1	Ms01t014590.1,Ms02t031640.1,Ms01t006370.1,Ms08t220160.1,Ms10t270240.1,Ms02t026440.1	CKAN_02458000,CKAN_02372200,CKAN_02382700	COCNU_HT001RO01_04T011310	lm5633.a03.4.g14180_p1	.	Glyma.10G012200.1,Glyma.14G028500.1	.	Zosma01g35400,Zosma05g01140,Zosma04g20110	GO:0003723, GO:0004519, GO:0090305	RNA binding, endonuclease activity, nucleic acid phosphodiester bond hydrolysis
OG0000025	Wa8730a001g000030	.	Ms01t005380.1	CKAN_02440500	.	lm5633.a03.4.g14190_p1	.	.	.	Zosma01g37780,Zosma05g02270	GO:0015937, GO:0004595, GO:0080020	coenzyme A biosynthetic process, pantetheine-phosphate adenylyltransferase activity, regulation of coenzyme A biosynthetic process
OG0000026	Wa8730a001g000040	.	Ms06t178380.1	.	.	lm5633.a03.4.g14100_p1	.	.	.	Zosma01g37580	GO:0090305, GO:0004519, GO:0009451	nucleic acid phosphodiester bond hydrolysis, endonuclease activity, RNA modification
OG0000027	Wa8730a001g000050	AT3G62010.1	.	CKAN_02444800,CKAN_02375200	.	lm5633.a03.4.g14160_p1	.	Glyma.03G226200.1,Glyma.19G223200.1,Glyma.10G140500.1,Glyma.20G089300.1	Zm00001e004908_T001	.	-	0
OG0000028	Wa8730a001g000060	AT4G01610.1,AT1G02305.1,AT3G05940.1,AT5G26740.1	Ms01t014440.1,Ms03t071120.1,Ms08t212120.1,Ms05t143970.1	CKAN_02376600,CKAN_02344100	.	lm5633.a03.4.g14170_p1	LOC_Os03g61210.1	Glyma.03G226700.1,Glyma.19G223700.1,Glyma.10G141000.1,Glyma.20G089700.1	.	Zosma01g37590,Zosma01g27320	GO:0005615, GO:0004197, GO:0005764	extracellular space, cysteine-type endopeptidase activity, lysosome
OG0000029	Wa8730a001g000070	.	.	.	.	.	.	.	.	.
OG0000030	Wa8730a001g000080	AT5G26742.2,AT2G47330.1	Ms01t016460.1,Ms11t310980.1,Ms01t006230.1,Ms04t103180.1,Ms02t026460.1	CKAN_02452200,CKAN_02358500,CKAN_02376700	COCNU_HT001RO01_04T011110,COCNU_HT001RO01_16T004570	lm5633.a03.4.g14090_p1	LOC_Os03g61220.1,LOC_Os07g43980.1	Glyma.03G226600.1,Glyma.19G223600.1,Glyma.10G140900.1,Glyma.20G089600.1	Zm00001e038325_T001,Zm00001e001454_T001	Zosma01g37570,Zosma05g01240,Zosma03g15150	GO:0010501, GO:0000373, GO:0070035	RNA secondary structure unwinding, Group II intron splicing, obsolete purine NTP-dependent helicase activity
OG0000031	Wa8730a001g000090	.	.	.	.	lm5633.a03.4.g14080_p1	.	Glyma.14G208400.1	.	Zosma01g35420,Zosma02g25110	-	0
OG0000032	Wa8730a001g000100	.	Ms01t006160.1	.	.	.	.	Glyma.03G226500.1,Glyma.19G223500.1	.	.	GO:0010152, GO:0061614, GO:0005680	pollen maturation, pri-miRNA transcription by RNA polymerase II, anaphase-promoting complex
OG0000033	Wa8730a001g000110	AT3G17611.1	Ms08t220340.1	.	COCNU_HT001RO01_01T022670	lm5633.a03.4.g14020_p1	LOC_Os01g18100.1	Glyma.17G043300.1,Glyma.13G116600.1	Zm00001e025462_T001	Zosma03g15290	GO:0005623, GO:0005886, GO:0071944	obsolete cell, plasma membrane, cell periphery
OG0000034	Wa8730a001g000120	.	Ms01t014060.1,Ms11t309940.1,Ms07t180850.1	.	.	lm5633.a03.4.g14040_p1	.	.	Zm00001e026106_T001,Zm00001e002785_T001	Zosma02g19460,Zosma02g25200,Zosma03g15240	-	0
OG0000035	Wa8730a001g000130	.	Ms05t135730.1	CKAN_02385700	COCNU_HT001RO01_01T022720	lm5633.a03.4.g13960_p1	.	.	.	Zosma02g25250	-	0
OG0000036	Wa8730a001g000140	AT3G17630.1,AT1G64170.1	Ms05t135740.1,Ms03t071060.1,Ms11t314300.1,Ms05t123190.1,Ms06t177130.1,Ms05t143960.1	CKAN_02445400,CKAN_02161100	COCNU_HT001RO01_01T022740	lm5633.a03.4.g14000_p1	LOC_Os05g31730.1,LOC_Os03g61290.1	Glyma.17G043400.1,Glyma.10G131500.1,Glyma.13G116400.1	Zm00001e026782_T001	Zosma02g25190	GO:0006812, GO:0005770, GO:0015672	cation transport, late endosome, inorganic cation transmembrane transport
OG0000037	Wa8730a001g000150	AT4G01680.1,AT1G09540.1,AT1G63910.1,AT5G26660.1,AT1G57560.2,AT3G12720.1	Ms01t014890.1,Ms05t135690.1,Ms09t254100.1,Ms02t031970.1,Ms03t070980.1,Ms01t016240.1,Ms11t314320.1,Ms06t178020.1,Ms08t220370.1,Ms04t103160.1,Ms03t057400.1	CKAN_02446500,CKAN_02373900,CKAN_02377800,CKAN_00091400,CKAN_02335700	COCNU_HT001RO01_01T000120,COCNU_HT001RO01_01T022540	lm5633.a03.4.g14010_p1	LOC_Os07g44090.3,LOC_Os01g18240.1,LOC_Os05g04820.1,LOC_Os03g25550.1	Glyma.01G051700.1,Glyma.03G225200.1,Glyma.19G224600.1,Glyma.02G006800.1,Glyma.10G142200.1,Glyma.20G090700.1,Glyma.14G214500.1,Glyma.02G244600.1	Zm00001e040384_T001,Zm00001e017428_T003,Zm00001e027531_T001,Zm00001e035652_T002	Zosma02g18260,Zosma06g18070,Zosma01g37180	GO:0000981, GO:0001134, GO:0006357	DNA-binding transcription factor activity, RNA polymerase II-specific, obsolete transcription regulator recruiting activity, regulation of transcription by RNA polymerase II
OG0000038	Wa8730a001g000160	.	Ms02t024900.1	.	.	.	.	.	.	.	-	0
OG0000039	Wa8730a001g000170	AT3G07160.1	.	.	.	lm5633.a03.4.g13800_p1	.	.	.	Zosma05g01170	GO:0009555, GO:0009556, GO:0019953	pollen development, microsporogenesis, sexual reproduction
OG0000040	Wa8730a001g000180	AT3G07160.2	.	.	.	lm5633.a03.4.g13810_p1	.	Glyma.13G116450.1	Zm00001e004891_T001	Zosma05g01160	GO:0009555, GO:0009556, GO:0019953	pollen development, microsporogenesis, sexual reproduction
OG0000041	Wa8730a001g000190	AT4G01660.1	.	.	.	lm5633.a03.4.g13820_p1	LOC_Os01g21610.1	Glyma.02G006500.1,Glyma.10G139300.1	Zm00001e026233_T004	Zosma06g16450	GO:0051187, GO:0006744, GO:0015996	obsolete cofactor catabolic process, ubiquinone biosynthetic process, chlorophyll catabolic process
OG0000042	Wa8730a001g000200	AT4G01660.1	.	.	.	lm5633.a03.4.g13840_p1	.	Glyma.02G006500.1,Glyma.10G139300.1	.	Zosma06g16450	GO:0051187, GO:0006744, GO:0015996	obsolete cofactor catabolic process, ubiquinone biosynthetic process, chlorophyll catabolic process
OG0000043	Wa8730a001g000210	AT4G01660.1	.	.	.	lm5633.a03.4.g13840_p1	LOC_Os01g21610.1	Glyma.02G006500.1,Glyma.10G139300.1	Zm00001e026233_T001	Zosma06g16450	GO:0051187, GO:0006744, GO:0015996	obsolete cofactor catabolic process, ubiquinone biosynthetic process, chlorophyll catabolic process
OG0000044	Wa8730a001g000220	AT4G01660.1	.	.	.	lm5633.a03.4.g13840_p1	.	Glyma.02G006500.1,Glyma.10G139300.1	.	Zosma06g16450	GO:0051187, GO:0006744, GO:0015996	obsolete cofactor catabolic process, ubiquinone biosynthetic process, chlorophyll catabolic process
OG0000045	Wa8730a001g000230	AT4G01800.1	Ms02t026470.1	CKAN_02448000	COCNU_HT001RO01_01T000270	lm5633.a03.4.g13660_p1	LOC_Os01g21820.1	Glyma.02G007700.1,Glyma.10G137800.1	Zm00001e017535_T001	.	GO:0015450, GO:0042623, GO:0071806	P-P-bond-hydrolysis-driven protein transmembrane transporter activity, ATPase activity, protein transmembrane transport
OG0000046	Wa8730a001g000240	AT4G01800.3	Ms02t026470.1	.	COCNU_HT001RO01_01T000270	lm5633.a03.4.g13700_p1	LOC_Os01g21820.1	Glyma.02G007700.1,Glyma.10G137800.1	Zm00001e017535_T001	.	GO:0033220, GO:0015462, GO:0008144	obsolete ATPase-coupled amide-transporter activity, ABC-type protein transporter activity, drug binding
OG0000047	Wa8730a001g000250	.	Ms05t135640.1	CKAN_02447700	COCNU_HT001RO01_01T022360	lm5633.a03.4.g13740_p1	.	.	.	Zosma01g39470	-	0
OG0000048	Wa8730a001g000260	AT3G62130.1,AT5G26600.2	Ms11t314380.1,Ms10t270200.1	CKAN_02378500	COCNU_HT001RO01_16T000220,COCNU_HT001RO01_01T015460	lm5633.a03.4.g13630_p1	LOC_Os01g18640.1	Glyma.03G228300.1,Glyma.19G225600.3,Glyma.02G007800.3,Glyma.10G137700.1,Glyma.20G092400.1	Zm00001e025440_T001,Zm00001e017441_T001	.	-, GO:0019450, GO:0080146	0, L-cysteine catabolic process to pyruvate, L-cysteine desulfhydrase activity
OG0000049	Wa8730a001g000270	AT1G48300.1	Ms02t031980.1,Ms01t016280.1	CKAN_02373600,CKAN_00482800	COCNU_HT001RO01_01T000280	lm5633.a03.4.g13620_p1	LOC_Os05g04620.1	Glyma.13G118300.1	Zm00001e040366_T001	Zosma04g20130	GO:0005829, GO:0019432, GO:0004144	cytosol, triglyceride biosynthetic process, diacylglycerol O-acyltransferase activity
OG0000050	Wa8730a001g000280	AT4G01700.1,AT1G02360.3,AT3G12500.1	Ms09t255120.1	CKAN_00784500	COCNU_HT001RO01_01T022440	lm5633.a03.4.g13750_p1	LOC_Os05g33130.1,LOC_Os01g18400.1,LOC_Os05g04690.1	Glyma.19G221800.1,Glyma.02G007400.1,Glyma.09G038500.1	Zm00001e025447_T001,Zm00001e027534_T001,Zm00001e026826_T001	Zosma01g36510	GO:0050832, GO:0004568, GO:0010337	defense response to fungus, chitinase activity, regulation of salicylic acid metabolic process
OG0000051	Wa8730a001g000290	AT3G12010.1	Ms01t014530.1	.	.	lm5633.a03.4.g13650_p1	.	Glyma.19G150400.1	Zm00001e004844_T001	Zosma02g19880	-	0
OG0000052	Wa8730a001g000300	.	Ms07t180610.1	.	.	lm5633.a03.4.g13550_p1	.	.	.	Zosma02g25500	GO:0031048, GO:0070919, GO:0060145	heterochromatin assembly by small RNA, production of siRNA involved in chromatin silencing by small RNA, RNAi-mediated antiviral immune response
OG0000054	Wa8730a001g000310	.	Ms06t177980.1	CKAN_02443700	.	lm5633.a03.4.g13580_p1	.	Glyma.01G052800.1	.	Zosma02g19300	GO:0012507, GO:0005483, GO:0048280	ER to Golgi transport vesicle membrane, soluble NSF attachment protein activity, vesicle fusion with Golgi apparatus
OG0000055	Wa8730a001g000320	.	Ms11t312800.1	.	COCNU_HT001RO01_04T010870,COCNU_HT001RO01_16T004640	lm5633.a03.4.g13440_p1	LOC_Os03g19720.1	.	Zm00001e038319_T001	Zosma01g11940	GO:0005829, GO:0005509, GO:0042538	cytosol, calcium ion binding, hyperosmotic salinity response
OG0000056	Wa8730a001g000330	.	Ms08t216430.1	CKAN_02361500	COCNU_HT001RO01_04T010840	lm5633.a03.4.g13500_p1	LOC_Os03g19690.1	Glyma.17G034800.1,Glyma.07G238900.1	Zm00001e026155_T002,Zm00001e001468_T001	Zosma03g14900	-	0
OG0000057	Wa8730a001g000340	.	Ms11t306280.1	.	.	.	.	.	.	Zosma03g28980	-	0
OG0000058	Wa8730a001g000350	.	.	.	.	.	.	.	.	.
OG0000059	Wa8730a001g000360	.	.	CKAN_02360500	COCNU_HT001RO01_01T001080	lm5633.a03.4.g13530_p1	LOC_Os05g06510.2	Glyma.09G035700.1,Glyma.15G140501.1	.	.	-	0
OG0000060	Wa8730a001g000370	.	Ms01t015100.1	.	COCNU_HT001RO01_01T001420	lm5633.a03.4.g13360_p1	LOC_Os03g61630.1	.	Zm00001e026053_T003	Zosma02g24670,Zosma02g03380	GO:0012507, GO:0048194, GO:0005643	ER to Golgi transport vesicle membrane, Golgi vesicle budding, nuclear pore
OG0000061	Wa8730a001g000380	AT3G62340.1,AT1G64000.1,AT2G47260.1,AT5G49520.1	Ms06t177170.1,Ms07t179680.1	CKAN_02457800,CKAN_02362800,CKAN_02385000,CKAN_00119600,CKAN_01814300	COCNU_HT001RO01_04T011200,COCNU_HT001RO01_16T004700	lm5633.a03.4.g13340_p1	LOC_Os05g49100.1,LOC_Os01g43650.1	Glyma.17G035400.4,Glyma.01G056800.8,Glyma.03G220800.1,Glyma.19G217800.1,Glyma.02G010900.1,Glyma.07G238000.4,Glyma.10G011300.2,Glyma.09G034300.1,Glyma.15G139000.1,Glyma.14G028900.1,Glyma.08G082400.1	.	Zosma01g37270,Zosma02g25430,Zosma03g29140	GO:0003700, GO:0009733, GO:0009624	DNA-binding transcription factor activity, response to auxin, response to nematode
OG0000062	Wa8730a001g000390	.	.	.	.	lm5633.a03.4.g13370_p1	.	Glyma.13G122200.1	.	Zosma01g36720	GO:0005776, GO:0044805, GO:0034497	autophagosome, late nucleophagy, protein localization to phagophore assembly site
OG0000063	Wa8730a001g000400	AT3G05810.2,AT5G26800.1	Ms01t016410.1	.	COCNU_HT001RO01_16T004740	.	LOC_Os01g19400.1	Glyma.10G146200.1,Glyma.20G096000.1	Zm00001e017473_T001	Zosma03g19770	-	0
OG0000064	Wa8730a001g000410	.	.	.	.	.	.	.	.	.
OG0000065	Wa8730a001g000420	AT3G05970.1,AT1G64400.1,AT2G47240.1	Ms08t216500.1,Ms02t032150.1,Ms08t235910.1,Ms01t006420.1	CKAN_00485500	COCNU_HT001RO01_04T011320	lm5633.a03.4.g13190_p1	LOC_Os05g04170.3	Glyma.03G221350.1,Glyma.19G218300.2,Glyma.02G010300.2,Glyma.10G010800.4,Glyma.14G208300.1,Glyma.02G239500.1	Zm00001e040332_T001	.	GO:0010025, GO:0010143, GO:0001676	wax biosynthetic process, cutin biosynthetic process, long-chain fatty acid metabolic process
OG0000066	Wa8730a001g000430	AT1G09280.1	Ms03t052310.1,Ms03t070820.1,Ms07t190910.1	CKAN_02363400	COCNU_HT001RO01_01T000860	lm5633.a03.4.g13230_p1	LOC_Os12g37630.1	Glyma.10G146100.1,Glyma.20G095800.1	Zm00001e025456_T001,Zm00001e002888_T003	Zosma06g16520,Zosma04g20230	-	0
OG0000067	Wa8730a001g000440	AT1G09300.2	Ms03t070830.1	CKAN_00485400	COCNU_HT001RO01_01T000850	.	LOC_Os12g37640.1	Glyma.10G146000.1,Glyma.20G095700.1	Zm00001e002890_T002	Zosma02g20820	GO:0042803, GO:0003094, GO:0016485	protein homodimerization activity, glomerular filtration, protein processing
OG0000069	Wa8730a001g000450	AT1G09410.1,AT1G56690.1	Ms01t014090.1,Ms05t135890.1,Ms09t255100.1,Ms01t015930.1,Ms08t212580.1,Ms11t310850.1,Ms01t006370.1,Ms06t159600.1,Ms06t176830.1,Ms08t220400.1,Ms05t138630.1,Ms10t270250.1,Ms07t180650.1,Ms07t191250.1,Ms02t026440.1,Ms05t144100.1	CKAN_02451100,CKAN_02372200,CKAN_00477100,CKAN_02380300,CKAN_00122700,CKAN_02181900,CKAN_02332800,CKAN_00549300,CKAN_01800500,CKAN_00828800	COCNU_HT001RO01_04T011310,COCNU_HT001RO01_01T001210,COCNU_HT001RO01_12T005800,COCNU_HT001RO01_16T004850,COCNU_HT001RO01_01T022290,COCNU_HT001RO01_01T015590	lm5633.a03.4.g13260_p1	LOC_Os03g19980.2,LOC_Os07g44170.1,LOC_Os05g06150.1	Glyma.01G056202.1,Glyma.07G245500.1,Glyma.10G012200.1,Glyma.20G095432.1,Glyma.19G151350.1,Glyma.08G080333.1,Glyma.13G119700.1	Zm00001e025557_T001,Zm00001e040321_T001,Zm00001e017435_T001,Zm00001e038303_T001,Zm00001e001754_T001,Zm00001e001494_T001	Zosma06g16590,Zosma01g35400,Zosma01g30050,Zosma02g25030,Zosma03g17900,Zosma04g20260,Zosma04g16850,Zosma03g28780,Zosma03g14640,Zosma01g12240	GO:0003723, GO:0004519, GO:0090305	RNA binding, endonuclease activity, nucleic acid phosphodiester bond hydrolysis
OG0000070	Wa8730a001g000460	.	.	.	.	.	.	.	.	.
OG0000071	Wa8730a001g000470	AT1G09330.1	Ms02t031150.1,Ms08t235540.1,Ms01t016370.1	CKAN_02364100,CKAN_00484100	COCNU_HT001RO01_16T004890	lm5633.a03.4.g13290_p1	LOC_Os01g22870.1,LOC_Os05g06700.2	Glyma.03G230100.1,Glyma.19G227600.1,Glyma.10G145400.2,Glyma.20G094600.1	Zm00001e017578_T001,Zm00001e027476_T002	Zosma01g36870,Zosma03g17930,Zosma01g12220	GO:0009306, GO:0031901, GO:0030173	protein secretion, early endosome membrane, integral component of Golgi membrane
OG0000072	Wa8730a001g000480	AT1G56590.1	Ms01t015960.1,Ms05t138180.1	CKAN_02452900	COCNU_HT001RO01_04T011480	lm5633.a03.4.g13310_p1	LOC_Os05g31780.1	Glyma.03G230200.1,Glyma.19G227500.1,Glyma.10G145500.1	.	Zosma03g17920,Zosma02g03350	GO:0097480, GO:0048490, GO:0099003	establishment of synaptic vesicle localization, anterograde synaptic vesicle transport, vesicle-mediated transport in synapse
OG0000073	Wa8730a001g000490	AT3G17205.1	Ms05t143850.1	CKAN_02453000	COCNU_HT001RO01_01T000690	lm5633.a03.4.g13180_p1	LOC_Os05g06690.1	Glyma.17G037600.1,Glyma.07G235800.1,Glyma.15G137000.1	.	Zosma02g18230	GO:0005737, GO:0016567, GO:0061630	cytoplasm, protein ubiquitination, ubiquitin protein ligase activity
OG0000074	Wa8730a001g000500	AT3G17205.1	Ms05t143870.1	.	COCNU_HT001RO01_01T000690	.	LOC_Os05g06690.1	Glyma.17G037600.1,Glyma.07G235800.1,Glyma.15G137000.1	.	Zosma02g18230	GO:0005737, GO:0061630, GO:0016567	cytoplasm, ubiquitin protein ligase activity, protein ubiquitination
OG0000075	Wa8730a001g000510	.	Ms03t070860.1,Ms02t026260.1	CKAN_02161000	COCNU_HT001RO01_01T000700	lm5633.a03.4.g13150_p1	LOC_Os05g48290.3	.	.	Zosma06g18290,Zosma04g20010,Zosma04g16980,Zosma03g32250	GO:0051082, GO:0061077, GO:0044183	unfolded protein binding, chaperone-mediated protein folding, protein folding chaperone
OG0000076	Wa8730a001g000520	AT3G62610.1,AT3G06490.1,AT1G48000.1,AT2G47190.1,AT5G49620.1	Ms01t013550.1,Ms03t053890.1,Ms11t303230.1,Ms09t254990.1,Ms08t216520.1,Ms08t235550.1,Ms01t016380.1,Ms11t312890.1,Ms11t317220.1,Ms05t138190.1,Ms04t103560.1,Ms10t296980.1,Ms03t057910.1	CKAN_02453100,CKAN_02364000,CKAN_00484300,CKAN_02382600	COCNU_HT001RO01_01T000720	.	LOC_Os03g20090.1,LOC_Os01g19330.1,LOC_Os05g04210.1,LOC_Os05g49310.1,LOC_Os12g37690.1,LOC_Os01g45090.1	Glyma.17G037500.1,Glyma.03G221700.1,Glyma.19G218800.1,Glyma.07G235900.1,Glyma.10G132200.3,Glyma.10G010400.1,Glyma.09G032100.1,Glyma.20G082300.1,Glyma.05G234600.1	Zm00001e040334_T001,Zm00001e026166_T001,Zm00001e027552_T001,Zm00001e038287_T001,Zm00001e002893_T001,Zm00001e001492_T001	Zosma02g18260,Zosma06g18070,Zosma01g36940	GO:0000981, GO:1902074, GO:0006357	DNA-binding transcription factor activity, RNA polymerase II-specific, response to salt, regulation of transcription by RNA polymerase II
OG0000077	Wa8730a001g000530	AT3G06490.1	.	.	.	.	.	Glyma.09G032100.1	.	.	GO:0001135, GO:1902074, GO:0001134	obsolete RNA polymerase II transcription regulator recruiting activity, response to salt, obsolete transcription regulator recruiting activity
OG0000078	Wa8730a001g000540	AT2G47170.1	Ms03t054840.1,Ms11t306240.1,Ms09t255910.1,Ms11t310570.1,Ms05t123760.1,Ms10t296540.1,Ms03t064980.1	CKAN_02452500,CKAN_00323100,CKAN_00827200	COCNU_HT001RO01_16T000200,COCNU_HT001RO01_01T000160,COCNU_HT001RO01_12T005530,COCNU_HT001RO01_12T000080,COCNU_HT001RO01_01T015830,COCNU_HT001RO01_07T002970	lm5633.a03.4.g13050_p1	LOC_Os01g16030.2,LOC_Os03g59740.2,LOC_Os07g12170.1	.	Zm00001e025541_T003	Zosma06g16440,Zosma04g16610,Zosma04g25100,Zosma06g25460	GO:0006886, GO:0006471, GO:0005794	intracellular protein transport, protein ADP-ribosylation, Golgi apparatus
OG0000079	Wa8730a001g000550	AT1G09620.1	.	.	.	lm5633.a03.4.g13080_p1	.	.	.	Zosma04g17460	GO:0004819, GO:1990253, GO:1904263	glutamine-tRNA ligase activity, cellular response to leucine starvation, positive regulation of TORC1 signaling
OG0000080	Wa8730a001g000560	AT3G06500.1,AT1G56560.1	Ms05t142670.1,Ms03t053910.1,Ms08t228400.1,Ms08t212300.1,Ms06t159510.1,Ms02t026250.1,Ms03t065490.1	CKAN_02363900,CKAN_00484700	COCNU_HT001RO01_04T009770,COCNU_HT001RO01_01T000780,COCNU_HT001RO01_16T004870	lm5633.a03.4.g13130_p1	LOC_Os03g20020.1,LOC_Os01g22900.1	Glyma.17G037400.1,Glyma.03G230400.1,Glyma.19G227300.1,Glyma.07G236000.1,Glyma.10G145600.1,Glyma.20G095200.1,Glyma.08G143500.1	Zm00001e017580_T001,Zm00001e026243_T001,Zm00001e038290_T001,Zm00001e001489_T005	Zosma01g36990,Zosma02g24330,Zosma03g17910,Zosma04g24430	GO:0046677, GO:0009636, GO:0005987	response to antibiotic, response to toxic substance, sucrose catabolic process
OG0000081	Wa8730a001g000570	AT1G02400.1,AT1G47990.1	Ms03t052640.1,Ms11t302850.1,Ms09t253560.1,Ms08t216730.1,Ms11t311130.1,Ms10t270650.1,Ms07t191960.1	CKAN_00484800,CKAN_02382800,CKAN_01816700	COCNU_HT001RO01_01T000790,COCNU_HT001RO01_16T004860,COCNU_HT001RO01_13T004300	lm5633.a03.4.g13110_p1	LOC_Os01g22910.1,LOC_Os05g48700.1,LOC_Os05g06670.1	Glyma.17G037300.1,Glyma.03G221600.1,Glyma.19G218700.1,Glyma.02G010100.1,Glyma.07G236100.1,Glyma.10G010700.1,Glyma.09G032200.1,Glyma.08G085400.1	Zm00001e017581_T001	Zosma02g18300	GO:0042447, GO:0046395, GO:0045487	hormone catabolic process, carboxylic acid catabolic process, gibberellin catabolic process
OG0000082	Wa8730a001g000580	AT1G09410.1,AT1G56570.2	Ms03t052740.1,Ms11t306390.1,Ms09t254820.1,Ms02t031690.1,Ms08t237580.1,Ms06t159730.1,Ms08t220400.1,Ms10t270170.1,Ms07t181090.1,Ms04t103150.1,Ms02t026070.1,Ms05t143810.1,Ms11t322240.1,Ms03t065700.1,Ms03t057500.1	CKAN_02375100,CKAN_00484900,CKAN_02380300,CKAN_00091100,CKAN_02159800,CKAN_00549300,CKAN_01814400,CKAN_00828800	COCNU_HT001RO01_04T011290,COCNU_HT001RO01_12T005800,COCNU_HT001RO01_16T005240,COCNU_HT001RO01_01T015200,COCNU_HT001RO01_05T007790,COCNU_HT001RO01_13T002420,COCNU_HT001RO01_07T003160	lm5633.a03.4.g13040_p1	LOC_Os03g19980.1,LOC_Os07g44170.1,LOC_Os01g19380.1,LOC_Os05g06150.1	Glyma.07G234800.1,Glyma.10G008100.2,Glyma.08G140700.1	Zm00001e025544_T001,Zm00001e040321_T001,Zm00001e017435_T001,Zm00001e038303_T001,Zm00001e010837_T001,Zm00001e007538_T001	Zosma06g16590,Zosma01g30050,Zosma05g01770,Zosma04g20260,Zosma04g16760,Zosma03g29010,Zosma04g25260	GO:0090305, GO:0080156, GO:0004519	nucleic acid phosphodiester bond hydrolysis, mitochondrial mRNA modification, endonuclease activity
OG0000083	Wa8730a001g000590	.	Ms01t014510.1,Ms02t031780.1,Ms03t070880.1,Ms08t228850.1,Ms08t235630.1,Ms06t178060.1,Ms10t270510.1,Ms11t321440.1	CKAN_02452000,CKAN_02382200,CKAN_00110500	COCNU_HT001RO01_01T000180	lm5633.a03.4.g13020_p1	LOC_Os01g22600.1	Glyma.09G031000.1	Zm00001e017566_T006,Zm00001e026241_T002	Zosma01g37000,Zosma02g25640,Zosma03g29080,Zosma01g40740,Zosma01g13340	GO:0098876, GO:0005525, GO:0031001	vesicle-mediated transport to the plasma membrane, GTP binding, response to brefeldin A
OG0000084	Wa8730a001g000600	.	Ms08t235850.1	.	.	lm5633.a03.4.g13000_p1	LOC_Os03g26220.1	Glyma.01G045300.1	.	.	-	0
OG0000085	Wa8730a001g000610	AT4G01897.1	Ms01t006200.1	CKAN_00479100	COCNU_HT001RO01_04T011420	lm5633.a03.4.g12980_p1	.	Glyma.03G222200.1,Glyma.19G219400.1	.	Zosma02g25130	-	0
OG0000086	Wa8730a001g000620	.	.	.	.	.	.	.	.	.
OG0000087	Wa8730a001g000630	AT1G56700.1	Ms11t303180.1,Ms08t216540.1,Ms11t317250.1	CKAN_02367100,CKAN_02381700,CKAN_02331100	COCNU_HT001RO01_04T011580,COCNU_HT001RO01_01T000570	lm5633.a03.4.g12930_p1	LOC_Os07g44610.1,LOC_Os03g25270.2	Glyma.03G229300.2,Glyma.19G226600.2,Glyma.10G144800.5,Glyma.20G093900.1	Zm00001e001773_T001,Zm00001e038146_T001,Zm00001e035687_T001	Zosma01g37040	GO:0005622, GO:0005737, GO:0044424	intracellular anatomical structure, cytoplasm, obsolete intracellular part
OG0000088	Wa8730a001g000640	AT4G01890.1,AT1G02460.1,AT1G56710.1,AT1G48100.1	Ms03t053920.1,Ms11t303170.1,Ms09t255020.1,Ms08t228410.1,Ms08t212230.1,Ms01t005980.1,Ms01t009430.1,Ms06t160280.1,Ms07t180920.1,Ms04t102890.1	CKAN_02367200,CKAN_02381300,CKAN_00097600,CKAN_02332700	COCNU_HT001RO01_04T011570,COCNU_HT001RO01_01T000580,COCNU_HT001RO01_01T021820	lm5633.a03.4.g12900_p1	LOC_Os01g22590.1,LOC_Os01g19170.1,LOC_Os01g44970.1	Glyma.03G222500.1,Glyma.19G219700.1,Glyma.02G009300.1,Glyma.10G010000.1,Glyma.09G031600.1,Glyma.15G136700.3,Glyma.08G087900.1,Glyma.12G012200.1	Zm00001e017565_T003,Zm00001e017465_T001,Zm00001e026160_T001	Zosma06g18050,Zosma01g37050,Zosma01g27200,Zosma03g32440,Zosma02g03360,Zosma01g39680	GO:0004650, GO:0009831, GO:0009825	polygalacturonase activity, plant-type cell wall modification involved in multidimensional cell growth, multidimensional cell growth
OG0000089	Wa8730a001g000650	AT1G09420.1	Ms11t303210.1	CKAN_02381800	COCNU_HT001RO01_04T011590	lm5633.a03.4.g12910_p1	LOC_Os03g20300.1	Glyma.03G229400.1,Glyma.19G226700.1	Zm00001e038292_T001	Zosma02g24340	-	0
OG0000090	Wa8730a001g000660	.	Ms03t052540.1,Ms09t253770.1,Ms08t229380.1,Ms07t191080.1	CKAN_01804700	COCNU_HT001RO01_13T004160	lm5633.a03.11.g06380_p1,lm5633.a03.4.g12950_p1	.	.	Zm00001e007559_T001	Zosma02g19670,Zosma03g30880	GO:0009969, GO:0008417, GO:0036065	xyloglucan biosynthetic process, fucosyltransferase activity, fucosylation
OG0000091	Wa8730a001g000670	AT2G41850.1,AT4G01890.1,AT3G62110.1,AT1G02460.1,AT1G56710.1,AT1G48100.1	Ms03t053920.1,Ms11t303170.1,Ms09t255020.1,Ms08t228410.1,Ms08t212230.1,Ms11t313540.1,Ms01t005980.1,Ms01t009430.1,Ms06t160280.1,Ms07t180920.1,Ms04t102890.1	CKAN_02447900,CKAN_02367500,CKAN_02381300,CKAN_02332700	COCNU_HT001RO01_04T011570,COCNU_HT001RO01_01T000580,COCNU_HT001RO01_01T021840	lm5633.a03.4.g12900_p1	LOC_Os01g22590.1,LOC_Os01g19170.1,LOC_Os01g44970.1	Glyma.03G222500.1,Glyma.19G219700.1,Glyma.02G009300.1,Glyma.10G010000.1,Glyma.09G031600.1,Glyma.15G136700.3,Glyma.08G087900.3,Glyma.12G012200.1	Zm00001e017565_T003,Zm00001e017465_T001,Zm00001e026240_T001	Zosma06g18050,Zosma01g37050,Zosma01g27200,Zosma03g32440,Zosma02g03370	GO:0009831, GO:0004650, GO:0009825	plant-type cell wall modification involved in multidimensional cell growth, polygalacturonase activity, multidimensional cell growth
OG0000092	Wa8730a001g000680	.	.	.	COCNU_HT001RO01_01T000590	lm5633.a03.4.g12880_p1	.	.	.	.	GO:0010405, GO:1990714, GO:0018258	arabinogalactan protein metabolic process, hydroxyproline O-galactosyltransferase activity, protein O-linked glycosylation via hydroxyproline
OG0000093	Wa8730a001g000690	AT3G06440.1	Ms11t311640.1	CKAN_02380500	COCNU_HT001RO01_01T000590	lm5633.a03.4.g12880_p1	LOC_Os01g22550.1	Glyma.17G038100.4	Zm00001e017564_T002	Zosma01g29990,Zosma03g17990	GO:0090558, GO:1990714, GO:0009101	plant epidermis development, hydroxyproline O-galactosyltransferase activity, glycoprotein biosynthetic process
OG0000094	Wa8730a001g000700	AT3G62260.1,AT3G17250.1,AT3G05640.1,AT5G27930.1,AT1G48040.1	Ms03t053930.1,Ms03t071290.1,Ms08t228420.1,Ms08t211770.1,Ms06t159660.1,Ms10t270210.1	CKAN_02451600,CKAN_02368200,CKAN_00492700,CKAN_00715000	COCNU_HT001RO01_04T011540,COCNU_HT001RO01_16T004960,COCNU_HT001RO01_01T014760	lm5633.a03.4.g12870_p1	LOC_Os01g19130.1,LOC_Os05g04360.1	Glyma.17G038000.1,Glyma.02G009100.1,Glyma.07G233000.1,Glyma.10G009800.1,Glyma.09G031700.1	Zm00001e025432_T001,Zm00001e040337_T001	Zosma02g18050,Zosma01g36660,Zosma01g41250,Zosma01g32210	GO:0009819, GO:0006470, GO:1904526	drought recovery, protein dephosphorylation, regulation of microtubule binding
OG0000095	Wa8730a001g000710	.	.	.	.	lm5633.a03.4.g12850_p1	.	.	.	Zosma06g16470,Zosma03g18020	GO:0052803, GO:0004400, GO:0000105	imidazole-containing compound metabolic process, histidinol-phosphate transaminase activity, histidine biosynthetic process
OG0000096	Wa8730a001g000720	.	.	.	.	.	.	.	.	.
OG0000098	Wa8730a001g000730	AT3G17340.1	Ms02t032360.1,Ms03t070920.1	CKAN_02368900,CKAN_02330100,CKAN_00324800	COCNU_HT001RO01_04T009980,COCNU_HT001RO01_01T000530	lm5633.a03.4.g12810_p1	.	Glyma.17G038500.1,Glyma.07G233500.1	.	Zosma03g16650	GO:0070934, GO:0030895, -	CRD-mediated mRNA stabilization, apolipoprotein B mRNA editing enzyme complex, 0
OG0000099	Wa8730a001g000740	AT1G64570.1	.	CKAN_00551000	.	lm5633.a03.4.g12760_p1	.	Glyma.15G107800.1,Glyma.13G204900.1	.	.	-	0
OG0000100	Wa8730a001g000750	AT3G17360.1	.	CKAN_02369300	COCNU_HT001RO01_04T009820	lm5633.a03.4.g12780_p1	LOC_Os07g44400.1	Glyma.17G038700.1	Zm00001e035665_T001	Zosma03g18100	GO:0000911, GO:0005871, GO:1902410	cytokinesis by cell plate formation, kinesin complex, mitotic cytokinetic process
OG0000102	Wa8730a001g000760	AT4G01860.2	Ms04t103570.1	CKAN_02370200	COCNU_HT001RO01_01T000410	lm5633.a03.4.g12670_p1	.	Glyma.19G220100.1	.	Zosma03g19680	GO:0008285, GO:0010507, GO:0007050	negative regulation of cell population proliferation, negative regulation of autophagy, cell cycle arrest
OG0000103	Wa8730a001g000770	.	.	CKAN_00717100	.	lm5633.a03.4.g12700_p1	LOC_Os05g05840.1	Glyma.05G234900.1	Zm00001e027509_T002	Zosma01g13170	GO:0005739, GO:0032543, GO:0140053	mitochondrion, mitochondrial translation, mitochondrial gene expression
OG0000104	Wa8730a001g000780	.	.	.	COCNU_HT001RO01_07T003120	lm5633.a03.4.g12730_p1	.	Glyma.14G209200.1,Glyma.02G239900.1	.	.	-	0
OG0000105	Wa8730a001g000790	AT4G01850.1,AT3G17390.1,AT1G02500.1	Ms05t142740.1,Ms03t053970.1,Ms02t032010.1,Ms08t212210.1,Ms01t006180.1,Ms05t138100.1,Ms07t181130.1,Ms11t322350.1,Ms03t057960.1	CKAN_02450600,CKAN_02370400,CKAN_00480400,CKAN_02379600	COCNU_HT001RO01_04T011610,COCNU_HT001RO01_01T000400,COCNU_HT001RO01_16T005440,COCNU_HT001RO01_12T000310	lm5633.a03.11.g06110_p1	LOC_Os01g22010.1,LOC_Os01g18860.1,LOC_Os05g04510.1	Glyma.17G039000.1,Glyma.03G223000.1,Glyma.19G220200.1,Glyma.07G233800.1,Glyma.10G144300.1,Glyma.15G190500.4	Zm00001e040353_T003,Zm00001e026226_T001,Zm00001e027541_T001	Zosma04g26690,Zosma01g12280	GO:0006555, GO:0004478, GO:0005829	methionine metabolic process, methionine adenosyltransferase activity, cytosol
OG0000106	Wa8730a001g000800	AT2G41970.1,AT3G62220.1,AT3G17410.1,AT1G48210.1,AT2G47060.1	Ms05t142330.1,Ms03t054770.1,Ms11t303110.1,Ms08t216570.1,Ms02t031520.1,Ms08t229540.1,Ms08t237560.1,Ms11t311960.1,Ms02t025060.1,Ms06t178050.1,Ms03t046950.1,Ms07t189490.1,Ms11t321930.1,Ms03t064130.1,Ms03t057980.1	CKAN_02450200,CKAN_02370900,CKAN_00480500,CKAN_02163400,CKAN_02331800,CKAN_00717500,CKAN_00784800	COCNU_HT001RO01_01T000340,COCNU_HT001RO01_12T006210,COCNU_HT001RO01_16T005810,COCNU_HT001RO01_12T000290,COCNU_HT001RO01_01T015650,COCNU_HT001RO01_05T007870	lm5633.a03.4.g12590_p1	LOC_Os03g20450.1,LOC_Os01g21970.1,LOC_Os05g04520.1	Glyma.17G039800.8,Glyma.03G223100.1,Glyma.19G220300.2,Glyma.02G008500.1,Glyma.07G234300.3,Glyma.10G009100.2,Glyma.19G149700.1,Glyma.10G107500.1	Zm00001e025437_T002,Zm00001e017544_T001,Zm00001e040354_T001,Zm00001e027540_T001,Zm00001e038281_T001	Zosma02g20010,Zosma01g37070,Zosma02g25370,Zosma03g16560,Zosma05g02890,Zosma03g30580,Zosma02g03700,Zosma01g39130,Zosma03g14450,Zosma01g32550,Zosma01g12300,Zosma06g25730	GO:0048768, GO:0007178, GO:0004675	root hair cell tip growth, transmembrane receptor protein serine/threonine kinase signaling pathway, transmembrane receptor protein serine/threonine kinase activity
OG0000107	Wa8730a001g000810	.	Ms02t032360.1	.	.	.	.	.	.	.	GO:0070937, GO:0030895, GO:0070934	CRD-mediated mRNA stability complex, apolipoprotein B mRNA editing enzyme complex, CRD-mediated mRNA stabilization
OG0000108	Wa8730a001g000820	AT3G06483.1	Ms11t303070.1,Ms08t216610.1,Ms11t317300.1	CKAN_02449800,CKAN_02371400	COCNU_HT001RO01_16T000620,COCNU_HT001RO01_01T015560	lm5633.a03.4.g12500_p1	LOC_Os07g44330.2,LOC_Os03g25400.1	Glyma.17G040500.1,Glyma.13G119800.2,Glyma.15G188500.1	Zm00001e001791_T002,Zm00001e038145_T002,Zm00001e035663_T002	Zosma03g19690	GO:0007154, GO:0009927, GO:0005524	cell communication, histidine phosphotransfer kinase activity, ATP binding
OG0000109	Wa8730a001g000830	.	.	CKAN_02164800,CKAN_02350600	.	.	.	.	.	.	GO:0005794, GO:0009741, GO:0009505	Golgi apparatus, response to brassinosteroid, plant-type cell wall
OG0000110	Wa8730a001g000840	AT3G62190.1	.	.	.	.	LOC_Os07g44310.1	Glyma.03G223300.3	Zm00001e010836_T001	Zosma03g18150	-	0
OG0000111	Wa8730a001g000850	AT3G17440.1,AT1G48240.1	Ms11t305320.1,Ms02t031790.1,Ms11t317290.1,Ms05t138110.1	CKAN_02371300,CKAN_02379100	COCNU_HT001RO01_16T000660,COCNU_HT001RO01_01T015520,COCNU_HT001RO01_07T004550	.	LOC_Os07g44350.1,LOC_Os03g25390.1	Glyma.17G040400.1,Glyma.13G119900.1	Zm00001e010834_T002,Zm00001e001785_T001,Zm00001e035664_T001	Zosma05g01730,Zosma04g26720	GO:0006623, GO:0098827, GO:0042175	protein targeting to vacuole, endoplasmic reticulum subcompartment, nuclear outer membrane-endoplasmic reticulum membrane network
OG0000112	Wa8730a001g000860	AT1G09470.1,AT3G05830.3,AT5G26770.1	Ms11t303080.1,Ms08t216590.1	CKAN_02449900,CKAN_02371200	COCNU_HT001RO01_01T015500	lm5633.a03.4.g12510_p1	LOC_Os01g18840.1,LOC_Os05g04530.1	Glyma.10G144000.1,Glyma.20G092900.3	Zm00001e040355_T001,Zm00001e017450_T002,Zm00001e027539_T001	Zosma01g37140,Zosma02g25330,Zosma01g12320	GO:0005654, GO:0005635, GO:0043621	nucleoplasm, nuclear envelope, protein self-association
OG0000113	Wa8730a001g000870	AT1G09450.1	Ms11t303090.1	CKAN_00480700	COCNU_HT001RO01_01T015490	lm5633.a03.4.g12550_p1	LOC_Os07g44360.1	Glyma.03G228700.1,Glyma.19G226000.1	Zm00001e010833_T001	Zosma03g18130	GO:0035402, GO:0000278, GO:0051276	histone kinase activity (H3-T11 specific), mitotic cell cycle, chromosome organization
OG0000114	Wa8730a001g000880	AT4G02300.1,AT3G62170.1,AT3G05610.1,AT5G27870.1,AT2G47030.1,AT5G49180.1,AT3G10710.1	Ms11t303690.1,Ms09t252790.1,Ms08t216360.1,Ms08t229850.1,Ms05t123930.1,Ms11t317010.1,Ms06t177740.1,Ms05t138380.1,Ms07t189600.1,Ms11t321550.1	CKAN_02449600,CKAN_02361000,CKAN_00480800,CKAN_02378900,CKAN_02349200,CKAN_02518000,CKAN_00332000	COCNU_HT001RO01_05T007930,COCNU_HT001RO01_13T002480	lm5633.a03.4.g12490_p1	LOC_Os03g18860.1	Glyma.17G044700.1,Glyma.03G223400.1,Glyma.19G220600.1,Glyma.02G008400.1,Glyma.07G245300.1,Glyma.10G136900.1,Glyma.10G009000.1,Glyma.09G042100.1,Glyma.13G186100.1,Glyma.20G237800.4,Glyma.15G223800.1,Glyma.13G115200.2,Glyma.15G183700.1,Glyma.05G236800.1	.	Zosma02g20160,Zosma01g36400,Zosma01g29260,Zosma03g32140	GO:0043086, GO:0071944, GO:0030599	negative regulation of catalytic activity, cell periphery, pectinesterase activity
OG0000115	Wa8730a001g000890	.	.	.	.	.	LOC_Os01g44200.1	.	.	.	-	0
OG0000116	Wa8730a001g000900	.	.	.	.	.	.	Glyma.13G120600.1	.	Zosma04g21300,Zosma01g40590	GO:0005575, GO:0005576, -	cellular_component, extracellular region, 0
OG0000117	Wa8730a001g000910	.	.	.	.	.	.	.	.	Zosma04g21300,Zosma01g40590	GO:0005575, GO:0005576, -	cellular_component, extracellular region, 0
OG0000118	Wa8730a001g000920	AT1G48100.1	Ms03t053920.1,Ms11t303170.1,Ms09t255020.1,Ms08t228410.1,Ms01t016600.1,Ms08t212230.1,Ms11t313540.1,Ms01t005980.1,Ms01t009430.1,Ms06t160280.1,Ms07t180920.1,Ms04t102890.1	CKAN_02367200,CKAN_00475300,CKAN_02392200,CKAN_00097500,CKAN_02348100	COCNU_HT001RO01_01T000580,COCNU_HT001RO01_01T021840	lm5633.a03.4.g12400_p1	LOC_Os01g22590.1,LOC_Os01g19170.1,LOC_Os03g59330.1	Glyma.03G137700.1,Glyma.07G245100.1,Glyma.09G041600.1,Glyma.19G140600.3,Glyma.08G087900.1,Glyma.15G196100.1,Glyma.12G012200.1,Glyma.09G224800.1	Zm00001e017565_T003,Zm00001e017465_T001,Zm00001e026160_T001,Zm00001e002846_T002	Zosma01g37050,Zosma03g32440,Zosma02g03370,Zosma01g39680,Zosma03g14510	GO:0009825, GO:0009831, GO:0004650	multidimensional cell growth, plant-type cell wall modification involved in multidimensional cell growth, polygalacturonase activity
OG0000119	Wa8730a001g000930	.	Ms09t255090.1,Ms11t321400.1	CKAN_02449200	COCNU_HT001RO01_12T000250	lm5633.a03.4.g12380_p1	.	Glyma.10G143800.1,Glyma.20G092502.2	.	Zosma04g26730	-	0
OG0000120	Wa8730a001g000940	.	.	.	.	.	LOC_Os01g73514.1	.	.	Zosma06g24830	GO:0051187, GO:0017168, GO:0006751	obsolete cofactor catabolic process, 5-oxoprolinase (ATP-hydrolyzing) activity, glutathione catabolic process
OG0000121	Wa8730a001g000950	.	Ms03t054210.1,Ms10t296730.1	CKAN_00303600,CKAN_00845300,CKAN_02171500	COCNU_HT001RO01_16T002540,COCNU_HT001RO01_04T008260,COCNU_HT001RO01_12T006790	lm5633.a03.11.g05960_p1	LOC_Os01g16650.1	Glyma.11G095700.2,Glyma.12G021800.1	Zm00001e025511_T003	Zosma02g17470,Zosma06g16360,Zosma04g17810,Zosma03g30700,Zosma06g25380	GO:0008283, GO:0033047, GO:0007088	cell population proliferation, regulation of mitotic sister chromatid segregation, regulation of mitotic nuclear division
OG0000122	Wa8730a001g000960	.	Ms08t216490.1,Ms02t031640.1,Ms08t212630.1,Ms11t313220.1,Ms01t005880.1,Ms02t025340.1,Ms06t177720.1,Ms03t047220.1,Ms10t270170.1,Ms07t181090.1,Ms07t191250.1,Ms02t026220.1,Ms05t144100.1,Ms10t297110.1,Ms03t066330.1	CKAN_02448400,CKAN_02359500,CKAN_02396100,CKAN_00110600,CKAN_02172100,CKAN_01589400,CKAN_00549300,CKAN_01811000	COCNU_HT001RO01_04T011490,COCNU_HT001RO01_01T001110,COCNU_HT001RO01_12T006580,COCNU_HT001RO01_16T004850,COCNU_HT001RO01_01T021590,COCNU_HT001RO01_13T003910,COCNU_HT001RO01_07T004530	lm5633.a03.11.g06160_p1,lm5633.a03.4.g12350_p1	LOC_Os12g04110.1,LOC_Os07g44170.1,LOC_Os01g19490.1,LOC_Os05g04160.1,LOC_Os12g37550.1	Glyma.07G234800.1,Glyma.10G001500.1,Glyma.13G197700.1,Glyma.13G121800.1,Glyma.15G201200.2,Glyma.11G098900.1,Glyma.06G093000.1	Zm00001e026211_T001,Zm00001e027557_T001,Zm00001e002882_T001,Zm00001e035654_T001	Zosma02g17100,Zosma06g17110,Zosma01g37080,Zosma01g27040,Zosma02g25750,Zosma03g19270,Zosma05g01060,Zosma04g21660,Zosma04g17300,Zosma03g29890,Zosma01g38540,Zosma04g26760,Zosma03g14820,Zosma01g12540,Zosma05g04470	GO:0031930, GO:0004519, GO:0090305	mitochondria-nucleus signaling pathway, endonuclease activity, nucleic acid phosphodiester bond hydrolysis
OG0000123	Wa8730a001g000970	AT3G06650.1,AT5G49460.1	Ms11t303320.1,Ms08t216340.1,Ms01t016450.1	CKAN_02456900,CKAN_00487500	COCNU_HT001RO01_04T010810,COCNU_HT001RO01_01T001110,COCNU_HT001RO01_16T004610	lm5633.a03.4.g12360_p1	LOC_Os01g19450.1	Glyma.17G033600.3,Glyma.07G239700.4,Glyma.09G035600.4,Glyma.15G140300.1	Zm00001e017478_T001,Zm00001e026219_T001	Zosma02g24410	GO:0006732, GO:0051186, GO:0005886	obsolete coenzyme metabolic process, obsolete cofactor metabolic process, plasma membrane
OG0000124	Wa8730a001g000980	AT5G26820.1	Ms03t053860.1,Ms08t212350.1,Ms03t064860.1	CKAN_02456800	COCNU_HT001RO01_01T001120	.	LOC_Os05g04120.1,LOC_Os12g37530.2	Glyma.10G146600.1	Zm00001e002877_T003	Zosma04g16840	GO:0044434, GO:0006879, GO:0009941	obsolete chloroplast part, cellular iron ion homeostasis, chloroplast envelope
OG0000125	Wa8730a001g000990	AT3G66658.2	Ms11t303370.1,Ms08t216320.1,Ms08t235770.1	CKAN_02358200,CKAN_00822700	COCNU_HT001RO01_04T011130,COCNU_HT001RO01_16T004560	.	.	Glyma.17G033100.1,Glyma.07G240300.1,Glyma.09G036000.5,Glyma.15G140900.1	.	Zosma03g28230,Zosma01g38810,Zosma04g24070	GO:0005783, GO:0004029, GO:0055114	endoplasmic reticulum, aldehyde dehydrogenase (NAD+) activity, obsolete oxidation-reduction process
OG0000126	Wa8730a001g001000	AT3G62360.2	Ms11t303330.1	CKAN_02359400	COCNU_HT001RO01_04T010800	lm5633.a03.4.g12300_p1	LOC_Os01g19470.1	Glyma.03G220700.1,Glyma.19G217500.1	Zm00001e026218_T001	Zosma01g27160	-	0
OG0000127	Wa8730a001g001010	AT5G12290.1	Ms07t200670.1	CKAN_00447200	COCNU_HT001RO01_04T006710	lm5633.a03.4.g12250_p1	LOC_Os03g24050.1,LOC_Os03g26030.1	Glyma.14G038000.1,Glyma.02G277200.1	Zm00001e001702_T001	Zosma01g37290	GO:0019375, -, GO:0050665	galactolipid biosynthetic process, 0, hydrogen peroxide biosynthetic process
OG0000128	Wa8730a001g001020	AT3G62370.1	Ms08t216330.1	CKAN_02359100	COCNU_HT001RO01_04T010770	lm5633.a03.4.g12270_p1	LOC_Os03g19580.1	Glyma.02G011100.1,Glyma.10G011700.2	Zm00001e001460_T002	Zosma04g20780	-	0
OG0000129	Wa8730a001g001030	AT3G06480.1,AT2G47330.1	Ms11t304410.1,Ms09t253120.1,Ms08t237300.1,Ms01t016460.1,Ms01t006230.1,Ms01t008960.1,Ms10t270730.1,Ms04t103180.1	CKAN_02452200,CKAN_02358500,CKAN_00479000,CKAN_02376100,CKAN_00099400,CKAN_02330800	COCNU_HT001RO01_04T011110,COCNU_HT001RO01_01T000190,COCNU_HT001RO01_16T004570,COCNU_HT001RO01_15T001620,COCNU_HT001RO01_12T000320	lm5633.a03.4.g12040_p1	LOC_Os03g19530.1	Glyma.03G220600.1,Glyma.19G217400.1	Zm00001e038325_T002,Zm00001e001454_T002	Zosma01g37570,Zosma05g01240,Zosma04g17910,Zosma03g32620,Zosma03g15150	GO:0005634, GO:0003724, GO:0008186	nucleus, RNA helicase activity, RNA-dependent ATPase activity
OG0000130	Wa8730a001g001040	AT4G01995.1	.	CKAN_00488400	COCNU_HT001RO01_04T011100	.	LOC_Os05g04070.1	Glyma.02G011300.1,Glyma.10G011900.1	Zm00001e040329_T004	Zosma01g38870	-	0
OG0000131	Wa8730a001g001050	.	.	.	.	.	.	.	.	.
OG0000132	Wa8730a001g001060	AT4G31310.2	Ms09t252670.1,Ms08t230660.1	.	.	.	.	.	.	Zosma02g16820,Zosma03g19120	-	0
OG0000133	Wa8730a001g001070	.	Ms08t235190.1,Ms03t064350.1	.	COCNU_HT001RO01_04T008280	.	.	.	Zm00001e025512_T003	.	-	0
OG0000134	Wa8730a001g001080	AT4G01990.1,AT1G02370.1,AT1G64583.1	Ms11t303350.1,Ms01t009130.1	CKAN_02456300,CKAN_00488300,CKAN_01811000	COCNU_HT001RO01_04T010720	lm5633.a03.4.g12000_p1	LOC_Os01g19490.1	Glyma.03G127100.4,Glyma.02G011200.2,Glyma.10G011800.1	Zm00001e026211_T002	Zosma05g01060,Zosma04g24370,Zosma05g04470	GO:0090305, GO:0004519, GO:0009451	nucleic acid phosphodiester bond hydrolysis, endonuclease activity, RNA modification
OG0000135	Wa8730a001g001090	.	.	.	.	.	.	.	.	.
OG0000136	Wa8730a001g001100	.	Ms08t221260.1	.	.	lm5633.a03.4.g11990_p1	LOC_Os03g59640.1	Glyma.02G275400.1	.	Zosma01g39260	GO:0009570, GO:0010007, GO:0009534	chloroplast stroma, magnesium chelatase complex, chloroplast thylakoid
OG0000137	Wa8730a001g001110	.	Ms08t221260.1	.	.	lm5633.a03.4.g11990_p1	LOC_Os03g59640.1	.	.	Zosma01g39260	GO:0009570, GO:0010007, GO:0009534	chloroplast stroma, magnesium chelatase complex, chloroplast thylakoid
OG0000138	Wa8730a001g001120	.	Ms11t316290.1,Ms01t010120.1	.	COCNU_HT001RO01_12T006310	lm5633.a03.11.g06140_p1	.	.	.	Zosma02g18680	GO:0016020, GO:0006869, GO:0010876	membrane, lipid transport, lipid localization
OG0000139	Wa8730a001g001130	AT3G57270.1,AT4G31140.1	Ms03t053540.1,Ms08t228600.1,Ms05t124090.1,Ms02t024930.1,Ms10t270380.1	CKAN_00306600,CKAN_00852800,CKAN_02506700,CKAN_00451700	COCNU_HT001RO01_16T002630,COCNU_HT001RO01_04T008680,COCNU_HT001RO01_07T003850	lm5633.a03.4.g11950_p1	LOC_Os05g31140.1,LOC_Os01g71670.1,LOC_Os03g22530.1	Glyma.03G132700.1,Glyma.09G037100.4,Glyma.19G134800.2,Glyma.15G142400.1,Glyma.11G095100.1,Glyma.12G021300.1	Zm00001e031539_T001,Zm00001e018681_T003,Zm00001e028340_T001,Zm00001e026769_T001	Zosma02g20230,Zosma01g29310,Zosma02g24440,Zosma05g01880,Zosma03g28350,Zosma04g24120	GO:0009817, GO:0002215, GO:0046658	defense response to fungus, defense response to nematode, anchored component of plasma membrane
OG0000140	Wa8730a001g001140	AT3G54380.1	Ms08t215660.1	CKAN_00449500	COCNU_HT001RO01_16T002770	.	LOC_Os03g22870.1	Glyma.13G187800.1	Zm00001e038198_T001	Zosma04g20760	-	0
OG0000141	Wa8730a001g001150	AT2G40880.1,AT5G12140.1,AT3G12490.2	Ms03t065050.1	CKAN_00309500,CKAN_00840500,CKAN_00447700	COCNU_HT001RO01_16T000890,COCNU_HT001RO01_04T006640,COCNU_HT001RO01_01T016830	lm5633.a03.4.g11970_p1	LOC_Os01g16430.1	Glyma.13G189500.1,Glyma.14G038300.1,Glyma.15G227500.1	Zm00001e025516_T001	Zosma01g37230,Zosma05g04640	GO:0004869, GO:2000117, GO:0002020	cysteine-type endopeptidase inhibitor activity, negative regulation of cysteine-type endopeptidase activity, protease binding
OG0000142	Wa8730a001g001160	AT2G40850.1,AT3G56600.1	Ms04t103140.1,Ms05t144090.1	.	COCNU_HT001RO01_16T000930	lm5633.a03.4.g11570_p1	LOC_Os01g16470.1	Glyma.03G121200.1,Glyma.19G125900.1	Zm00001e025514_T001	.	-, GO:0004430, GO:0046854	0, 1-phosphatidylinositol 4-kinase activity, phosphatidylinositol phosphorylation
OG0000143	Wa8730a001g001170	.	Ms03t054830.1	CKAN_00323200	.	lm5633.a03.4.g11770_p1	LOC_Os01g16080.1	Glyma.04G129000.1	.	Zosma06g25450	-	0
OG0000144	Wa8730a001g001180	.	.	.	COCNU_HT001RO01_15T001480	lm5633.a03.4.g11580_p1	.	Glyma.11G156901.1,Glyma.08G076400.4	.	Zosma05g02810	-	0
OG0000145	Wa8730a001g001190	AT3G56590.1,AT3G10810.2	Ms08t229320.1,Ms08t235160.1,Ms11t316780.1,Ms01t006580.1	CKAN_00309100,CKAN_00840900,CKAN_00712300	COCNU_HT001RO01_16T002800,COCNU_HT001RO01_04T008830,COCNU_HT001RO01_13T004460	.	LOC_Os05g30990.1,LOC_Os01g71220.1	Glyma.19G125700.1,Glyma.02G161900.2,Glyma.10G101800.1	Zm00001e018699_T001,Zm00001e028350_T001	Zosma01g37390	-	0
OG0000146	Wa8730a001g001200	.	Ms03t048490.1	.	.	lm5633.a03.4.g11880_p1	.	Glyma.03G127700.1,Glyma.19G130251.1,Glyma.11G094600.1,Glyma.12G021000.1	.	Zosma04g17670	-	0
OG0000147	Wa8730a001g001210	AT3G62600.1,AT3G17830.1,AT1G56300.1,AT5G49580.1	Ms05t132920.1,Ms01t008790.1,Ms03t046800.1,Ms04t103910.1	CKAN_02453700,CKAN_00503800,CKAN_02164100,CKAN_00815800,CKAN_00785100	COCNU_HT001RO01_01T001360,COCNU_HT001RO01_13T004650	lm5633.a03.4.g11890_p1	.	Glyma.08G134400.1	.	Zosma06g16880,Zosma04g20510,Zosma01g40600	GO:0009534, GO:0009535, GO:0044436	chloroplast thylakoid, chloroplast thylakoid membrane, obsolete thylakoid part
OG0000148	Wa8730a001g001220	.	.	.	.	.	.	.	.	.
OG0000149	Wa8730a001g001230	.	Ms08t215270.1	CKAN_00324100	COCNU_HT001RO01_16T000550,COCNU_HT001RO01_04T006880,COCNU_HT001RO01_01T016330	lm5633.a03.4.g11930_p1	LOC_Os05g33460.2,LOC_Os06g12100.1	Glyma.07G249300.1,Glyma.09G046000.1	.	Zosma02g17980,Zosma02g23950	-	0
OG0000150	Wa8730a001g001240	AT2G40840.1	Ms03t054250.1	CKAN_00449300	COCNU_HT001RO01_16T002810	lm5633.a03.4.g11130_p1	LOC_Os07g46790.1	Glyma.03G121100.1,Glyma.19G125800.1	Zm00001e035785_T002	.	GO:0001871, GO:0005977, GO:0010297	obsolete pattern binding, glycogen metabolic process, heteropolysaccharide binding
OG0000151	Wa8730a001g001250	AT2G41720.1,AT3G62470.1,AT1G09680.1,AT5G12100.1	Ms03t053900.1,Ms09t254930.1,Ms08t216490.1,Ms05t132420.1,Ms08t236400.1,Ms01t015860.1,Ms07t200590.1,Ms01t008260.1,Ms06t177720.1,Ms08t220840.1,Ms03t047220.1,Ms10t270240.1,Ms10t297110.1,Ms03t066330.1	CKAN_02448400,CKAN_02359500,CKAN_00489600,CKAN_00308000,CKAN_02172100,CKAN_02507400,CKAN_01589400,CKAN_00344300,CKAN_00546900,CKAN_01811000,CKAN_00713400	COCNU_HT001RO01_16T002600,COCNU_HT001RO01_04T010970,COCNU_HT001RO01_01T000930,COCNU_HT001RO01_12T006800,COCNU_HT001RO01_16T004810,COCNU_HT001RO01_12T000260,COCNU_HT001RO01_05T008040,COCNU_HT001RO01_13T003910	lm5633.a03.4.g11190_p1	LOC_Os12g04110.1,LOC_Os07g46770.1,LOC_Os05g04160.1,LOC_Os01g15840.1,LOC_Os11g04295.1,LOC_Os12g37550.1,LOC_Os07g11280.1	Glyma.17G039500.1,Glyma.02G192800.1,Glyma.10G002800.3,Glyma.20G097200.4,Glyma.13G197400.1,Glyma.14G032600.1,Glyma.15G236000.2,Glyma.15G201200.2,Glyma.06G092600.1	Zm00001e018562_T001,Zm00001e027557_T001,Zm00001e010800_T001,Zm00001e002882_T001,Zm00001e004869_T002	Zosma02g17100,Zosma06g17110,Zosma01g37080,Zosma01g26920,Zosma02g25750,Zosma03g19150,Zosma05g01060,Zosma04g21840,Zosma04g17390,Zosma03g28240,Zosma02g02770,Zosma01g38930,Zosma04g26760,Zosma03g15130,Zosma04g24830	GO:0010239, GO:0090305, GO:0004519	chloroplast mRNA processing, nucleic acid phosphodiester bond hydrolysis, endonuclease activity
OG0000152	Wa8730a001g001260	AT2G41560.1,AT3G57330.1	Ms09t255410.1,Ms05t124080.1,Ms06t159180.1	CKAN_00307600,CKAN_00843000,CKAN_00449800	COCNU_HT001RO01_04T008910	lm5633.a03.4.g11220_p1	LOC_Os01g71240.1,LOC_Os12g04220.1,LOC_Os11g04460.1	Glyma.03G134200.1,Glyma.02G186100.3,Glyma.19G136400.4,Glyma.10G107700.1,Glyma.12G011000.2,Glyma.09G225500.2	Zm00001e018698_T001,Zm00001e028349_T001	Zosma02g24460,Zosma03g30180,Zosma03g15040	GO:0009624, GO:0071944, GO:0005794	response to nematode, cell periphery, Golgi apparatus
OG0000153	Wa8730a001g001270	AT2G41460.1,AT3G48425.1	.	CKAN_00304900	.	lm5633.a03.4.g11270_p1	.	Glyma.02G191100.2,Glyma.10G105800.1	.	Zosma03g19720	GO:0004528, GO:0042644, GO:0003906	phosphodiesterase I activity, chloroplast nucleoid, DNA-(apurinic or apyrimidinic site) endonuclease activity
OG0000154	Wa8730a001g001280	AT2G41500.1,AT2G47410.3	Ms11t316720.1,Ms11t322610.1	CKAN_02356500	COCNU_HT001RO01_04T008590	lm5633.a03.4.g11250_p1	LOC_Os03g23935.1	Glyma.03G220751.1,Glyma.02G190600.2,Glyma.10G000800.1	Zm00001e001685_T005	Zosma03g17610,Zosma03g28400,Zosma01g39070,Zosma04g25280	GO:0005681, GO:0005654, GO:0009560	spliceosomal complex, nucleoplasm, embryo sac egg cell differentiation
OG0000155	Wa8730a001g001290	AT2G41450.1	Ms03t054220.1	CKAN_00303700	COCNU_HT001RO01_04T008300	lm5633.a03.4.g11320_p1	LOC_Os05g31254.1	Glyma.03G132200.1,Glyma.19G134000.2	Zm00001e031543_T001	.	GO:0044666, GO:0031334, GO:0030330	MLL3/4 complex, positive regulation of protein-containing complex assembly, DNA damage response, signal transduction by p53 class mediator
OG0000156	Wa8730a001g001300	.	Ms11t304260.1	CKAN_00850200	COCNU_HT001RO01_16T002130	lm5633.a03.4.g11370_p1	LOC_Os01g72350.1	Glyma.13G197200.1,Glyma.15G235400.2	.	Zosma02g20300	-	0
OG0000157	Wa8730a001g001310	.	Ms11t304260.1	CKAN_00850200	COCNU_HT001RO01_16T002130	lm5633.a03.4.g11330_p1	LOC_Os01g72350.1	Glyma.13G197200.1,Glyma.15G235400.2	Zm00001e018592_T001	Zosma02g20300	-	0
OG0000158	Wa8730a001g001320	AT5G49700.1	Ms11t304280.1,Ms08t215420.1,Ms08t229490.1,Ms03t048820.1,Ms10t270310.1,Ms04t102810.1,Ms10t297490.1	CKAN_01810300	COCNU_HT001RO01_16T002090,COCNU_HT001RO01_02T017990,COCNU_HT001RO01_13T003840	lm5633.a03.4.g11420_p1	LOC_Os01g72450.1,LOC_Os11g05160.1	Glyma.06G093400.1	.	Zosma06g17070,Zosma01g29410,Zosma05g00780	-, GO:0003680, GO:1990837	0, minor groove of adenine-thymine-rich DNA binding, sequence-specific double-stranded DNA binding
OG0000159	Wa8730a001g001330	AT5G12330.1,AT3G54430.1	Ms03t054100.1,Ms09t255230.1,Ms08t228320.1	CKAN_02512900,CKAN_00822000	COCNU_HT001RO01_16T002040,COCNU_HT001RO01_02T017920	lm5633.a03.4.g11490_p1	LOC_Os05g32070.1,LOC_Os01g72490.1	Glyma.11G155400.1,Glyma.07G230400.6,Glyma.13G197300.1,Glyma.14G034800.1,Glyma.04G136700.4,Glyma.15G235000.1,Glyma.02G280000.1	Zm00001e031567_T001,Zm00001e028304_T001,Zm00001e026854_T001	Zosma02g18340,Zosma01g36440	GO:0042803, GO:0048466, GO:0048653	protein homodimerization activity, androecium development, anther development
OG0000160	Wa8730a001g001340	AT2G41220.1	Ms02t030940.1	CKAN_02511500	COCNU_HT001RO01_16T001980,COCNU_HT001RO01_02T017880	lm5633.a03.4.g10680_p1	LOC_Os07g46460.1	Glyma.03G128300.2,Glyma.19G130800.2	Zm00001e035758_T001	Zosma01g28420	GO:0019676, GO:0006537, GO:0009570	ammonia assimilation cycle, glutamate biosynthetic process, chloroplast stroma
OG0000161	Wa8730a001g001350	.	Ms03t054050.1	CKAN_02304500	COCNU_HT001RO01_16T001880	lm5633.a03.4.g10640_p1	LOC_Os05g32210.1,LOC_Os01g72690.1	Glyma.11G093600.1,Glyma.12G020100.1	Zm00001e018577_T001,Zm00001e028297_T001	Zosma01g13990	-	0
OG0000162	Wa8730a001g001360	AT2G41210.1,AT3G56960.2	Ms02t030930.1,Ms08t229340.1,Ms01t006330.1,Ms03t064410.1	CKAN_02512800,CKAN_00330700,CKAN_00714400,CKAN_00822100	COCNU_HT001RO01_16T002050,COCNU_HT001RO01_04T007130,COCNU_HT001RO01_12T004530,COCNU_HT001RO01_02T017950,COCNU_HT001RO01_13T004410	lm5633.a03.4.g11460_p1	LOC_Os12g04700.1,LOC_Os07g46490.1,LOC_Os03g24160.1,LOC_Os11g04840.1	Glyma.11G155500.1,Glyma.03G128100.1,Glyma.13G196700.1,Glyma.19G130700.1,Glyma.02G163800.5,Glyma.15G234800.1	Zm00001e035761_T002,Zm00001e009177_T001,Zm00001e010904_T001,Zm00001e001707_T001,Zm00001e038179_T001	Zosma02g20940,Zosma01g29290,Zosma03g28270,Zosma04g24910,Zosma06g25610	GO:0044459, GO:0016308, GO:0046854	obsolete plasma membrane part, 1-phosphatidylinositol-4-phosphate 5-kinase activity, phosphatidylinositol phosphorylation
OG0000163	Wa8730a001g001370	AT3G48610.1	Ms08t215400.1,Ms08t220710.1	CKAN_02511700,CKAN_01596000	COCNU_HT001RO01_16T002010,COCNU_HT001RO01_02T017890,COCNU_HT001RO01_07T003790	lm5633.a03.4.g10770_p1	LOC_Os01g72520.1	.	Zm00001e018581_T001	Zosma02g18350,Zosma02g03920,Zosma02g07220	GO:0052008, GO:0016311, GO:0003993	disruption by symbiont of host cellular component, dephosphorylation, acid phosphatase activity
OG0000164	Wa8730a001g001380	AT1G09750.1,AT3G54400.1	Ms08t215410.1,Ms05t132660.1	CKAN_02170900,CKAN_02511800,CKAN_00543300,CKAN_00712900	COCNU_HT001RO01_16T002020,COCNU_HT001RO01_04T006770,COCNU_HT001RO01_02T017900	lm5633.a03.4.g11500_p1	LOC_Os01g72510.1,LOC_Os07g46480.1	Glyma.11G157000.1,Glyma.13G196200.3,Glyma.14G030000.2,Glyma.04G136000.1,Glyma.15G234300.3,Glyma.06G093600.2	Zm00001e035760_T001,Zm00001e028303_T001	Zosma02g18320,Zosma06g17040,Zosma03g29930	GO:0043067, GO:0004190, GO:0009627	regulation of programmed cell death, aspartic-type endopeptidase activity, systemic acquired resistance
OG0000165	Wa8730a001g001390	AT2G41640.1,AT3G57380.1,AT3G10320.1	Ms02t031190.1,Ms05t133440.1,Ms01t015530.1,Ms11t316560.1,Ms07t190160.1	CKAN_02408900,CKAN_02306100	COCNU_HT001RO01_16T001640,COCNU_HT001RO01_02T017800	lm5633.a03.4.g10920_p1	LOC_Os05g32544.1,LOC_Os01g72610.1,LOC_Os07g46380.1,LOC_Os01g31370.1	Glyma.03G134800.1,Glyma.19G137400.1	Zm00001e031591_T001,Zm00001e035748_T001,Zm00001e028299_T001,Zm00001e027195_T001,Zm00001e010897_T001	Zosma02g20840,Zosma06g18810,Zosma02g24640	GO:0005871, -, GO:0003777	kinesin complex, 0, microtubule motor activity
OG0000166	Wa8730a001g001400	AT2G41640.1,AT3G57380.1,AT3G10320.1	Ms02t031190.1,Ms05t133440.1,Ms01t015530.1,Ms11t316560.1,Ms07t190140.1	CKAN_02408900,CKAN_02306100	COCNU_HT001RO01_16T001640,COCNU_HT001RO01_02T017800	lm5633.a03.4.g10970_p1	LOC_Os05g32544.1,LOC_Os01g72610.1,LOC_Os07g46380.1,LOC_Os01g31370.1	Glyma.03G134800.1,Glyma.19G137400.1	Zm00001e031591_T001,Zm00001e035748_T001,Zm00001e028299_T001,Zm00001e027195_T001,Zm00001e010897_T001	Zosma02g20840,Zosma06g18810,Zosma02g24640	GO:0005871, -, GO:0003777	kinesin complex, 0, microtubule motor activity
OG0000167	Wa8730a001g001410	AT2G41640.1,AT3G57380.1,AT3G10320.1	Ms05t133440.1,Ms01t015530.1,Ms11t316560.1	CKAN_02408900,CKAN_02306100	COCNU_HT001RO01_16T001640,COCNU_HT001RO01_02T017800	lm5633.a03.4.g10980_p1	LOC_Os05g32544.1,LOC_Os01g72610.1,LOC_Os07g46380.1,LOC_Os01g31370.1	Glyma.03G134800.1,Glyma.19G137400.1	Zm00001e031591_T001,Zm00001e035748_T001,Zm00001e028299_T001,Zm00001e027195_T001,Zm00001e010897_T001	Zosma02g20840,Zosma06g18810,Zosma02g24640	GO:0005871, -, GO:0003777	kinesin complex, 0, microtubule motor activity
OG0000168	Wa8730a001g001420	AT2G41640.1,AT3G57380.1,AT3G10320.1	Ms02t031190.1,Ms05t133440.1,Ms11t316560.1	CKAN_02408900,CKAN_02306100	COCNU_HT001RO01_16T001640,COCNU_HT001RO01_02T017800	lm5633.a03.4.g10990_p1	LOC_Os05g32544.1,LOC_Os01g72610.1,LOC_Os07g46380.1,LOC_Os01g31370.1	Glyma.03G134800.1,Glyma.19G137400.1	Zm00001e035748_T001,Zm00001e010897_T001	Zosma02g20840,Zosma06g18810,Zosma02g24640	GO:0005871, -, GO:0003777	kinesin complex, 0, microtubule motor activity
OG0000169	Wa8730a001g001430	AT2G41640.1,AT3G57380.1,AT3G10320.1	Ms02t031190.1,Ms05t133440.1,Ms01t015530.1,Ms11t316560.1,Ms08t221590.1,Ms07t190160.1	CKAN_02408900,CKAN_02306100	COCNU_HT001RO01_16T001640,COCNU_HT001RO01_02T017800	lm5633.a03.4.g10920_p1	LOC_Os05g32544.1,LOC_Os01g72610.1,LOC_Os07g46380.1,LOC_Os01g31370.1	Glyma.03G134800.1,Glyma.19G137400.1	Zm00001e031591_T001,Zm00001e035748_T001,Zm00001e028299_T001,Zm00001e027195_T001,Zm00001e010897_T001	Zosma02g20840,Zosma06g18810,Zosma02g24640	GO:0005871, -, GO:0003777	kinesin complex, 0, microtubule motor activity
OG0000170	Wa8730a001g001440	AT5G19380.1,AT5G12170.2	Ms08t236690.1,Ms01t006530.1	.	COCNU_HT001RO01_16T001920	lm5633.a03.4.g10840_p1	LOC_Os01g72570.1	Glyma.07G232500.1,Glyma.14G035600.1,Glyma.06G098600.1	Zm00001e018579_T002,Zm00001e028300_T002	Zosma01g36460	GO:0046686, GO:0002229, GO:0034635	response to cadmium ion, defense response to oomycetes, glutathione transport
OG0000171	Wa8730a001g001450	AT5G19390.2,AT5G12150.1	Ms03t054080.1,Ms09t255220.1,Ms02t030800.1,Ms01t014820.1	CKAN_02170600,CKAN_02511300	COCNU_HT001RO01_16T001940,COCNU_HT001RO01_02T017870	lm5633.a03.4.g10910_p1	LOC_Os07g46450.1,LOC_Os03g24180.1	Glyma.14G035400.5,Glyma.02G279300.2,Glyma.06G094000.1	Zm00001e035756_T001,Zm00001e010903_T002,Zm00001e001710_T001	Zosma03g17740	GO:0002011, GO:0005096, GO:0035024	morphogenesis of an epithelial sheet, GTPase activator activity, negative regulation of Rho protein signal transduction
OG0000172	Wa8730a001g001460	.	.	CKAN_02307900	COCNU_HT001RO01_02T017780	.	LOC_Os07g46400.1	.	.	.	-	0
OG0000173	Wa8730a001g001470	AT1G56420.1	Ms06t177560.1	CKAN_02454700	COCNU_HT001RO01_01T001260	lm5633.a03.4.g10530_p1	LOC_Os12g37390.1	Glyma.10G147400.5,Glyma.20G098100.6	.	Zosma01g27700	-	0
OG0000174	Wa8730a001g001480	AT5G12470.1	Ms08t214340.1,Ms05t132780.1,Ms06t177900.1	CKAN_02472600,CKAN_02304400	COCNU_HT001RO01_12T004500	lm5633.a03.4.g10400_p1	LOC_Os05g32230.1,LOC_Os01g72710.1	Glyma.11G093500.1,Glyma.12G009700.1,Glyma.12G020000.1,Glyma.09G227100.1	Zm00001e031571_T001,Zm00001e018574_T001	Zosma02g24150,Zosma05g03330,Zosma04g26740	GO:0044434, GO:0009706, GO:0009941	obsolete chloroplast part, chloroplast inner membrane, chloroplast envelope
OG0000175	Wa8730a001g001490	AT2G41720.1,AT4G01990.1,AT3G48810.1,AT1G09820.1,AT3G07290.1,AT5G27270.1,AT1G56690.1	Ms03t053510.1,Ms09t254930.1,Ms08t216490.1,Ms08t236460.1,Ms01t014960.1,Ms07t200590.1,Ms01t008260.1,Ms06t177720.1,Ms03t066330.1	CKAN_02468900,CKAN_00463600,CKAN_02409600,CKAN_02304600,CKAN_02172100,CKAN_02507400,CKAN_01589400,CKAN_00344300,CKAN_00546900,CKAN_01811100,CKAN_00713400,CKAN_00824200	COCNU_HT001RO01_16T002600,COCNU_HT001RO01_04T007160,COCNU_HT001RO01_01T001110,COCNU_HT001RO01_16T004810,COCNU_HT001RO01_05T006790,COCNU_HT001RO01_13T004640	lm5633.a03.4.g10360_p1	LOC_Os01g72930.1,LOC_Os12g04110.1,LOC_Os01g19380.1,LOC_Os11g04295.1,LOC_Os02g50280.1,LOC_Os07g11280.1	Glyma.03G136200.1,Glyma.03G238000.1,Glyma.02G192800.1,Glyma.10G001500.1,Glyma.19G138101.1,Glyma.14G034400.1,Glyma.15G202500.1,Glyma.06G093000.1,Glyma.05G246000.1	Zm00001e018562_T001,Zm00001e026211_T002,Zm00001e004869_T001	Zosma02g20140,Zosma06g18320,Zosma01g37080,Zosma03g18050,Zosma05g01060,Zosma04g21690,Zosma04g16040,Zosma03g28240,Zosma02g02770,Zosma01g40775,Zosma03g20650,Zosma04g26760,Zosma03g15050,Zosma05g20690,Zosma02g06210,Zosma05g04470	GO:0090305, GO:0004519, GO:0010239	nucleic acid phosphodiester bond hydrolysis, endonuclease activity, chloroplast mRNA processing
OG0000176	Wa8730a001g001500	.	Ms11t304360.1,Ms08t215340.1,Ms08t229200.1	CKAN_02305000	COCNU_HT001RO01_02T017670	lm5633.a03.4.g10390_p1	LOC_Os07g46240.1	Glyma.11G160275.1	Zm00001e010890_T002	Zosma02g25810,Zosma03g18200	-	0
OG0000177	Wa8730a001g001510	.	Ms11t304360.1,Ms11t316590.1	CKAN_02304000	COCNU_HT001RO01_16T001760,COCNU_HT001RO01_02T017660	lm5633.a03.4.g10310_p1	LOC_Os05g32380.1,LOC_Os11g04940.1	Glyma.11G093400.1	Zm00001e027192_T001	Zosma05g00410,Zosma03g21450,Zosma02g06190	GO:0004806, GO:0008970, GO:0047714	triglyceride lipase activity, phospholipase A1 activity, galactolipase activity
OG0000178	Wa8730a001g001520	AT1G09010.1	Ms03t053670.1	CKAN_02303200	COCNU_HT001RO01_16T001680	lm5633.a03.4.g10260_p1	LOC_Os05g32530.1	Glyma.03G238100.2,Glyma.19G235500.3,Glyma.10G154400.3,Glyma.20G233900.1	Zm00001e031590_T001	Zosma05g04700	GO:0005737, GO:0005773, GO:0044444	cytoplasm, vacuole, obsolete cytoplasmic part
OG0000180	Wa8730a001g001530	AT5G19280.1	.	CKAN_02406300,CKAN_02302000,CKAN_01809500	.	.	LOC_Os03g59530.1,LOC_Os07g11010.1	.	.	Zosma06g16930,Zosma01g36660,Zosma05g21020,Zosma01g32210	GO:0005886, GO:0050408, GO:0006470	plasma membrane, [pyruvate kinase]-phosphatase activity, protein dephosphorylation
OG0000182	Wa8730a001g001540	AT1G65580.1	Ms05t142060.1,Ms02t024970.1,Ms03t048220.1,Ms11t322710.1	CKAN_00711600	.	lm5633.a03.4.g10220_p1	.	.	.	Zosma02g21190,Zosma01g29720,Zosma02g24220,Zosma03g17510,Zosma04g26790,Zosma01g32200,Zosma06g26430	GO:0007584, GO:0009637, GO:0009611	response to nutrient, response to blue light, response to wounding
OG0000183	Wa8730a001g001550	AT1G66150.1,AT5G49760.1,AT4G31100.1,AT1G69730.1	Ms05t141970.1,Ms03t054980.1,Ms11t304500.1,Ms08t214290.1,Ms05t132470.1,Ms08t236420.1,Ms07t200830.1,Ms02t024670.1,Ms01t010180.1,Ms06t157690.1	CKAN_02469900,CKAN_00467000,CKAN_02398800,CKAN_00292700,CKAN_00844500,CKAN_00101600,CKAN_02423400,CKAN_02339800,CKAN_02515200,CKAN_00542900,CKAN_00789400	COCNU_HT001RO01_16T001510,COCNU_HT001RO01_01T001130,COCNU_HT001RO01_07T003100	.	LOC_Os06g12120.1	Glyma.09G027500.1,Glyma.13G201400.1,Glyma.14G212100.1	Zm00001e018576_T001,Zm00001e028296_T001,Zm00001e027171_T002,Zm00001e007576_T001	Zosma02g21030,Zosma06g16940,Zosma02g24830,Zosma05g03730,Zosma03g31490,Zosma02g03700,Zosma05g20330,Zosma01g32370,Zosma06g26520,Zosma02g06010	GO:0004383, GO:0004675, GO:0007178	guanylate cyclase activity, transmembrane receptor protein serine/threonine kinase activity, transmembrane receptor protein serine/threonine kinase signaling pathway
OG0000184	Wa8730a001g001560	AT5G49760.1,AT1G69730.1	Ms05t141970.1,Ms03t053840.1,Ms11t304500.1,Ms05t132470.1,Ms08t235050.1,Ms07t200840.1,Ms02t024670.1,Ms01t010180.1,Ms06t157690.1	CKAN_00503400,CKAN_02398800,CKAN_00292900,CKAN_00844500,CKAN_00101600,CKAN_02423400,CKAN_02339800,CKAN_00542900,CKAN_00790000	COCNU_HT001RO01_01T001130,COCNU_HT001RO01_07T003100	.	LOC_Os06g12120.1	Glyma.09G027500.1,Glyma.13G201400.1,Glyma.14G211200.1,Glyma.02G241500.1	Zm00001e018576_T001,Zm00001e028296_T001,Zm00001e027171_T002,Zm00001e007617_T001	Zosma02g21030,Zosma06g16940,Zosma02g24830,Zosma04g21310,Zosma03g31490,Zosma02g03700,Zosma05g20330,Zosma02g07030	GO:0004675, GO:0004383, GO:0006182	transmembrane receptor protein serine/threonine kinase activity, guanylate cyclase activity, cGMP biosynthetic process
OG0000185	Wa8730a001g001570	AT5G49760.1,AT4G31100.1,AT1G69730.1	Ms05t141970.1,Ms03t054980.1,Ms11t304500.1,Ms08t214290.1,Ms05t132470.1,Ms08t235050.1,Ms07t200840.1,Ms02t025060.1,Ms01t010180.1,Ms06t157690.1	CKAN_00503400,CKAN_02398800,CKAN_00292700,CKAN_02296900,CKAN_00101600,CKAN_02423400,CKAN_02339800,CKAN_02506300,CKAN_00542900,CKAN_00790000	COCNU_HT001RO01_01T001130,COCNU_HT001RO01_15T003240,COCNU_HT001RO01_13T003120,COCNU_HT001RO01_07T003100	.	LOC_Os06g12120.1	Glyma.09G027500.1,Glyma.13G201400.1,Glyma.19G152200.1	Zm00001e018576_T001,Zm00001e028296_T001,Zm00001e027171_T002,Zm00001e007576_T001	Zosma02g18710,Zosma06g16940,Zosma02g24830,Zosma05g03320,Zosma04g21310,Zosma03g30810,Zosma02g03700,Zosma05g20330,Zosma04g24570,Zosma01g32550,Zosma02g07030,Zosma05g04460	GO:0004383, GO:0004675, GO:0007178	guanylate cyclase activity, transmembrane receptor protein serine/threonine kinase activity, transmembrane receptor protein serine/threonine kinase signaling pathway
OG0000186	Wa8730a001g001580	AT3G17820.1,AT1G66200.1,AT1G48470.1	Ms03t054550.1,Ms09t255610.1,Ms08t236480.1,Ms01t014800.1,Ms01t008240.1,Ms08t222310.1,Ms03t066720.1	CKAN_02295400,CKAN_00343900,CKAN_00815500	COCNU_HT001RO01_16T001410	lm5633.a03.4.g09850_p1	LOC_Os02g50240.1	Glyma.15G102000.3,Glyma.13G210800.4,Glyma.14G213300.1,Glyma.02G244000.1	.	Zosma04g21940,Zosma04g17920,Zosma03g21040,Zosma05g20680	GO:0022626, GO:0004356, GO:0042128	cytosolic ribosome, glutamate-ammonia ligase activity, nitrate assimilation
OG0000187	Wa8730a001g001590	AT2G41080.1,AT5G19020.1,AT3G47840.1,AT1G03540.1,AT3G56550.2,AT5G27110.1,AT1G56570.1,AT3G24000.1,AT4G31070.1	Ms03t053880.1,Ms09t254820.1,Ms08t214360.1,Ms06t166520.1,Ms01t014590.1,Ms11t316430.1,Ms01t006320.1,Ms06t177650.1,Ms08t220950.1,Ms03t048300.1,Ms10t270250.1,Ms07t180650.1,Ms03t063240.1	CKAN_02468900,CKAN_00467300,CKAN_02409600,CKAN_02172100,CKAN_00450000,CKAN_00538400	COCNU_HT001RO01_04T007890,COCNU_HT001RO01_01T003060,COCNU_HT001RO01_12T004310,COCNU_HT001RO01_16T004850,COCNU_HT001RO01_01T016410,COCNU_HT001RO01_07T003160	lm5633.a03.11.g05510_p1,lm5633.a03.4.g09840_p1	LOC_Os01g71180.1,LOC_Os01g19380.1,LOC_Os02g50280.1	Glyma.03G239200.1,Glyma.15G103100.1,Glyma.14G032600.1,Glyma.02G281800.1,Glyma.18G151600.1,Glyma.05G244300.1	Zm00001e018565_T001,Zm00001e010919_T001,Zm00001e007597_T001	Zosma02g20140,Zosma06g16590,Zosma03g18530,Zosma05g03400,Zosma04g22120,Zosma04g16040,Zosma02g02690,Zosma03g21140,Zosma04g27110,Zosma05g20180,Zosma06g26340,Zosma02g06210,Zosma05g04770	GO:0003723, GO:0090305, GO:0004519	RNA binding, nucleic acid phosphodiester bond hydrolysis, endonuclease activity
OG0000188	Wa8730a001g001600	AT3G07420.1	.	CKAN_00466200	COCNU_HT001RO01_04T007650,COCNU_HT001RO01_12T004280	lm5633.a03.4.g10040_p1	.	.	.	Zosma03g17450	GO:0009793, GO:0046686, GO:0005739	embryo development ending in seed dormancy, response to cadmium ion, mitochondrion
OG0000189	Wa8730a001g001610	AT1G54215.1	Ms07t180780.1	CKAN_02473400	COCNU_HT001RO01_04T007900	lm5633.a03.4.g10100_p1	LOC_Os07g46180.1	.	.	Zosma02g18600,Zosma01g27340	GO:0016591, GO:0016593, GO:0009910	RNA polymerase II, holoenzyme, Cdc73/Paf1 complex, negative regulation of flower development
OG0000190	Wa8730a001g001620	.	Ms05t142370.1,Ms02t025130.1	.	COCNU_HT001RO01_15T001490	lm5633.a03.4.g12150_p1	.	.	.	Zosma05g02820	GO:0005634, GO:0003700, GO:0006355	nucleus, DNA-binding transcription factor activity, regulation of transcription, DNA-templated
OG0000191	Wa8730a001g001630	AT5G27395.1	Ms06t166090.1	CKAN_02293500	COCNU_HT001RO01_01T017800	.	LOC_Os07g45300.1	Glyma.10G157300.1,Glyma.20G231400.1	Zm00001e035726_T001	Zosma04g26920	-	0
OG0000192	Wa8730a001g001640	AT4G02980.1	.	CKAN_00508600	COCNU_HT001RO01_12T004240	lm5633.a03.4.g10090_p1	LOC_Os12g34450.1	Glyma.02G150100.1	Zm00001e039742_T002	.	GO:0051054, GO:0008270, GO:0005788	positive regulation of DNA metabolic process, zinc ion binding, endoplasmic reticulum lumen
OG0000193	Wa8730a001g001650	AT2G41310.1,AT3G48100.1,AT3G57040.2	Ms03t054150.1,Ms11t304250.1,Ms09t255270.1,Ms08t234930.1,Ms11t312520.1,Ms05t124150.1,Ms03t064080.1	CKAN_00462800,CKAN_00300300,CKAN_00849200,CKAN_00714500	COCNU_HT001RO01_16T002150,COCNU_HT001RO01_04T007110,COCNU_HT001RO01_12T004540	lm5633.a03.11.g05550_p1,lm5633.a03.4.g09950_p1	LOC_Os01g72330.1,LOC_Os12g04500.1,LOC_Os11g04720.2	Glyma.11G155100.1,Glyma.03G130000.1,Glyma.13G197600.1,Glyma.19G132300.1,Glyma.04G137600.2,Glyma.15G236200.1	Zm00001e018596_T002,Zm00001e028310_T001,Zm00001e007550_T001	Zosma01g36380,Zosma03g20890,Zosma06g25590	GO:0009736, GO:0000156, GO:0005634	cytokinin-activated signaling pathway, phosphorelay response regulator activity, nucleus
OG0000194	Wa8730a001g001660	AT3G54440.1	Ms11t316660.1	CKAN_02513100	COCNU_HT001RO01_02T018060	lm5633.a03.4.g09930_p1	LOC_Os01g72340.1	Glyma.13G197000.1	Zm00001e018595_T002	Zosma01g36420	-	0
OG0000195	Wa8730a001g001670	AT1G03360.1	Ms10t297630.1	CKAN_02469500	.	.	.	Glyma.19G152700.1	.	Zosma03g31760	GO:0071051, GO:0000176, GO:0034427	polyadenylation-dependent snoRNA 3'-end processing, nuclear exosome (RNase complex), nuclear-transcribed mRNA catabolic process, exonucleolytic, 3'-5'
OG0000196	Wa8730a001g001680	.	.	.	.	.	.	.	.	.
OG0000197	Wa8730a001g001690	.	.	.	COCNU_HT001RO01_15T002340	.	.	.	.	.	GO:0006626, GO:0005744, GO:0030150	protein targeting to mitochondrion, TIM23 mitochondrial import inner membrane translocase complex, protein import into mitochondrial matrix
OG0000198	Wa8730a001g001700	AT5G19420.1,AT3G47660.2,AT5G12350.1,AT1G54180.1,AT1G69710.1	Ms03t053340.1,Ms09t254460.1,Ms08t213740.1,Ms07t200420.1,Ms05t124160.1	CKAN_00299200,CKAN_02513400,CKAN_00332900,CKAN_00541900,CKAN_00713100	COCNU_HT001RO01_16T002170,COCNU_HT001RO01_02T018380,COCNU_HT001RO01_05T006970	lm5633.a03.4.g09980_p1	LOC_Os05g31920.1,LOC_Os01g72320.1	Glyma.14G034200.2,Glyma.02G280400.1	Zm00001e018599_T001,Zm00001e028312_T001	Zosma06g16810,Zosma01g36360,Zosma03g17170,Zosma04g24930	GO:0015630, GO:0032183, GO:0034613	microtubule cytoskeleton, SUMO binding, cellular protein localization
OG0000199	Wa8730a001g001710	.	Ms01t016560.1	.	.	lm5633.a03.4.g09960_p1	.	Glyma.02G286600.1	Zm00001e026781_T002	Zosma02g18690	GO:0043601, GO:0006269, GO:0043596	nuclear replisome, DNA replication, synthesis of RNA primer, nuclear replication fork
OG0000200	Wa8730a001g001720	.	.	.	.	lm5633.a03.4.g10130_p1	.	.	.	Zosma01g37160	-	0
OG0000201	Wa8730a001g001730	AT3G60910.1	Ms03t053950.1,Ms09t255110.1,Ms06t166150.1,Ms03t065090.1	CKAN_02306200	COCNU_HT001RO01_16T005010,COCNU_HT001RO01_02T017590	.	LOC_Os05g32590.1,LOC_Os07g46340.1	Glyma.12G010200.1,Glyma.09G226600.2	Zm00001e031595_T002,Zm00001e035743_T003	Zosma04g26640	GO:0001077, -, GO:1900367	DNA-binding transcription activator activity, RNA polymerase II-specific, 0, positive regulation of defense response to insect
OG0000203	Wa8730a001g001740	.	Ms09t254710.1,Ms03t064000.1	CKAN_00505400,CKAN_02307400	COCNU_HT001RO01_16T001660,COCNU_HT001RO01_02T017600	lm5633.a03.4.g10200_p1	LOC_Os05g32570.1	Glyma.11G157400.1,Glyma.13G195200.6,Glyma.04G134700.1,Glyma.15G233600.2	Zm00001e031592_T001,Zm00001e027199_T001	Zosma01g27350	GO:0005802, GO:0016197, GO:0004842	trans-Golgi network, endosomal transport, ubiquitin-protein transferase activity
OG0000204	Wa8730a001g001750	AT3G57090.2,AT5G12390.1	Ms05t124200.1	CKAN_00300800,CKAN_00847700	COCNU_HT001RO01_16T002230,COCNU_HT001RO01_02T018270	lm5633.a03.4.g10030_p1	LOC_Os05g31770.1,LOC_Os01g72280.1,LOC_Os03g24060.1	Glyma.03G129400.1,Glyma.19G131600.2,Glyma.14G033900.1,Glyma.02G280700.1	Zm00001e026857_T001,Zm00001e038181_T001	Zosma01g36260	GO:0005777, GO:0007031, GO:0005739	peroxisome, peroxisome organization, mitochondrion
OG0000205	Wa8730a001g001760	AT5G12380.1	Ms03t053120.1,Ms08t221460.1	CKAN_00300700,CKAN_00848000,CKAN_00437500,CKAN_00812900	COCNU_HT001RO01_16T002240,COCNU_HT001RO01_12T004550,COCNU_HT001RO01_13T002950	lm5633.a03.4.g09830_p1	LOC_Os05g31760.1,LOC_Os01g31270.1,LOC_Os06g11800.1	Glyma.11G153800.1,Glyma.13G199500.1,Glyma.04G140900.1,Glyma.15G237800.1,Glyma.08G136200.1	Zm00001e031554_T002,Zm00001e001703_T001	Zosma01g36270,Zosma01g29670	GO:0009409, GO:0009651, GO:0009414	response to cold, response to salt stress, response to water deprivation
OG0000206	Wa8730a001g001770	.	Ms08t214320.1,Ms07t199740.1	.	.	.	.	.	.	.	-	0
OG0000207	Wa8730a001g001780	AT1G66360.1	Ms05t142900.1,Ms08t215450.1,Ms05t133360.1,Ms07t199750.1	CKAN_00300500,CKAN_00848300,CKAN_00456900	COCNU_HT001RO01_16T002270	lm5633.a03.4.g09780_p1	LOC_Os05g31720.1,LOC_Os01g72230.1	Glyma.11G154100.1,Glyma.13G198600.1,Glyma.04G141600.3,Glyma.15G236900.2	Zm00001e031551_T001,Zm00001e028315_T001	Zosma01g36250,Zosma04g21810,Zosma03g31470,Zosma04g25060,Zosma01g32540,Zosma06g26330	GO:0047958, GO:0005096, GO:0005543	glycine:2-oxoglutarate aminotransferase activity, GTPase activator activity, phospholipid binding
OG0000208	Wa8730a001g001790	AT3G07300.3	Ms11t316650.1	CKAN_00848100	COCNU_HT001RO01_13T001860	lm5633.a03.4.g09790_p1	.	Glyma.11G154300.1	Zm00001e004858_T004	Zosma05g04490	GO:0044444, GO:0005525, GO:0005851	obsolete cytoplasmic part, GTP binding, eukaryotic translation initiation factor 2B complex
OG0000209	Wa8730a001g001800	AT3G54480.5	Ms10t270340.1	.	COCNU_HT001RO01_16T002270	lm5633.a03.4.g09800_p1	LOC_Os07g46555.1	Glyma.11G154400.1	Zm00001e035768_T001	Zosma01g36250	-	0
OG0000210	Wa8730a001g001810	AT3G57140.1	.	CKAN_00302800,CKAN_00845700	COCNU_HT001RO01_16T002460	lm5633.a03.4.g09520_p1	LOC_Os03g59620.1	Glyma.03G130900.1,Glyma.02G190000.1,Glyma.19G132900.1,Glyma.10G105200.1	.	Zosma06g16530	GO:0012511, GO:0019433, GO:0004806	monolayer-surrounded lipid storage body, triglyceride catabolic process, triglyceride lipase activity
OG0000211	Wa8730a001g001820	AT3G57140.1	.	CKAN_00302800,CKAN_00845700	COCNU_HT001RO01_16T002460	lm5633.a03.4.g09520_p1	LOC_Os03g59620.1	Glyma.03G130900.1,Glyma.02G190000.1,Glyma.19G132900.1,Glyma.10G105200.1	.	Zosma06g16530	GO:0012511, GO:0019433, GO:0004806	monolayer-surrounded lipid storage body, triglyceride catabolic process, triglyceride lipase activity
OG0000212	Wa8730a001g001830	AT2G41410.1,AT1G66400.1	Ms08t215470.1,Ms08t235220.1,Ms05t124230.1,Ms01t008400.1,Ms08t221870.1,Ms03t064380.1	CKAN_00501100,CKAN_02399000,CKAN_00302700,CKAN_02340300,CKAN_00454900,CKAN_00335100,CKAN_00815600	COCNU_HT001RO01_16T002470,COCNU_HT001RO01_04T008350	lm5633.a03.4.g09580_p1	LOC_Os05g31620.1,LOC_Os01g72100.1,LOC_Os12g04360.1,LOC_Os11g04560.1,LOC_Os02g50060.1	Glyma.03G130800.1,Glyma.19G132800.1,Glyma.04G144800.2,Glyma.14G215800.1,Glyma.05G238400.1,Glyma.02G245700.1	Zm00001e031549_T001,Zm00001e018643_T002,Zm00001e009189_T001,Zm00001e026863_T001	Zosma02g18430,Zosma01g36630,Zosma03g31370	GO:0010054, GO:0048767, GO:0080147	trichoblast differentiation, root hair elongation, root hair cell development
OG0000213	Wa8730a001g001840	AT5G18990.1,AT5G26810.1,AT3G24130.1	Ms08t216380.1,Ms08t235570.1,Ms11t312790.1,Ms05t123930.1	CKAN_02361000,CKAN_00487000,CKAN_02310800,CKAN_00341800	COCNU_HT001RO01_16T001100,COCNU_HT001RO01_01T003230,COCNU_HT001RO01_13T001810,COCNU_HT001RO01_07T004370	lm5633.a03.4.g09590_p1	LOC_Os07g46190.1,LOC_Os01g19440.1,LOC_Os01g44340.1	Glyma.10G146500.1,Glyma.19G145700.1,Glyma.13G113700.2	.	Zosma01g36410,Zosma01g29270,Zosma04g21270,Zosma03g31300,Zosma03g15540	GO:0043086, GO:0030599, GO:0046910	negative regulation of catalytic activity, pectinesterase activity, pectinesterase inhibitor activity
OG0000214	Wa8730a001g001850	AT3G47930.1	.	CKAN_00302200	COCNU_HT001RO01_04T007050	lm5633.a03.4.g09600_p1	LOC_Os12g04520.1,LOC_Os11g04740.1	Glyma.02G166300.1,Glyma.10G104100.1	Zm00001e009178_T001	Zosma03g31340	GO:0055114, GO:0080049, GO:0016633	obsolete oxidation-reduction process, L-gulono-1,4-lactone dehydrogenase activity, galactonolactone dehydrogenase activity
OG0000215	Wa8730a001g001860	AT3G23870.1	Ms05t142540.1,Ms08t213980.1,Ms11t312230.1,Ms01t010010.1,Ms03t063420.1	CKAN_00294000,CKAN_00847100,CKAN_00778700	COCNU_HT001RO01_04T007060,COCNU_HT001RO01_12T004590,COCNU_HT001RO01_15T003260	.	.	Glyma.14G033700.1,Glyma.12G168000.1,Glyma.02G280800.1	Zm00001e031704_T004,Zm00001e027029_T001,Zm00001e007520_T001	Zosma05g02210,Zosma04g15990	GO:0072511, GO:0015693, GO:0005769	inorganic cation transmembrane transport, magnesium ion transport, early endosome
OG0000216	Wa8730a001g001870	AT2G41380.1	.	CKAN_00301200	COCNU_HT001RO01_16T005290	lm5633.a03.4.g09730_p1	LOC_Os01g20206.1	Glyma.03G129300.1	Zm00001e026179_T001	Zosma01g37150	GO:0005737, GO:0008757, GO:0032259	cytoplasm, S-adenosylmethionine-dependent methyltransferase activity, methylation
OG0000217	Wa8730a001g001880	AT3G10210.1	.	CKAN_00847300	COCNU_HT001RO01_16T002340	lm5633.a03.4.g09710_p1	LOC_Os01g71980.1	Glyma.03G128800.1,Glyma.19G131200.1	Zm00001e018654_T002,Zm00001e028334_T001	Zosma03g31430	-	0
OG0000218	Wa8730a001g001890	AT3G57140.1	.	CKAN_00302800,CKAN_00845700	COCNU_HT001RO01_16T002460	lm5633.a03.4.g09520_p1	LOC_Os03g59620.1	Glyma.03G130900.1,Glyma.02G190000.1,Glyma.19G132900.1,Glyma.10G105200.1	.	Zosma06g16530	GO:0012511, GO:0019433, GO:0004806	monolayer-surrounded lipid storage body, triglyceride catabolic process, triglyceride lipase activity
OG0000219	Wa8730a001g001900	AT2G41410.1,AT1G66400.1,AT3G10190.1	Ms08t215470.1,Ms08t235220.1,Ms05t124230.1,Ms08t221870.1,Ms03t064380.1	CKAN_00501100,CKAN_02399000,CKAN_00302700,CKAN_02340300,CKAN_00454900	COCNU_HT001RO01_16T002450,COCNU_HT001RO01_16T005480	lm5633.a03.4.g09510_p1	LOC_Os01g72100.1,LOC_Os12g04360.1,LOC_Os03g59790.1,LOC_Os11g04560.1,LOC_Os02g50060.1	Glyma.03G130800.1,Glyma.19G132800.1,Glyma.05G238400.1	Zm00001e031549_T001,Zm00001e018644_T001,Zm00001e009189_T001,Zm00001e010984_T001	Zosma03g31370	GO:0048767, GO:0005509, GO:0050832	root hair elongation, calcium ion binding, defense response to fungus
OG0000220	Wa8730a001g001910	AT3G10200.1	Ms05t142320.1,Ms03t054570.1,Ms08t214060.1,Ms08t235780.1,Ms07t200290.1	.	COCNU_HT001RO01_16T002400,COCNU_HT001RO01_05T007190,COCNU_HT001RO01_13T003160,COCNU_HT001RO01_07T004330	.	LOC_Os05g31480.1	Glyma.02G189600.1,Glyma.10G101200.1	.	Zosma01g36230	GO:0032259, GO:0044431, GO:0005802	methylation, obsolete Golgi apparatus part, trans-Golgi network
OG0000221	Wa8730a001g001920	AT2G41370.1,AT3G57130.1	Ms03t054180.1,Ms11t304110.1,Ms09t255310.1,Ms05t133300.1,Ms05t124220.1,Ms11t316690.1,Ms10t270350.1	CKAN_00302600,CKAN_00846900	COCNU_HT001RO01_16T002390,COCNU_HT001RO01_04T007000,COCNU_HT001RO01_12T004620	lm5633.a03.4.g09490_p1	LOC_Os01g72020.1,LOC_Os12g04410.1,LOC_Os11g04600.1	Glyma.03G128600.1,Glyma.02G188700.1,Glyma.14G031300.1	Zm00001e018649_T001,Zm00001e028331_T001,Zm00001e009187_T001	Zosma02g17520,Zosma01g39310	GO:0019005, GO:0000003, GO:0009682	SCF ubiquitin ligase complex, reproduction, induced systemic resistance
OG0000222	Wa8730a001g001930	.	.	.	.	.	.	.	.	.
OG0000223	Wa8730a001g001940	AT2G13360.1	Ms08t230400.1,Ms07t199940.1	CKAN_00302000,CKAN_00847000	COCNU_HT001RO01_16T002370,COCNU_HT001RO01_04T008090	lm5633.a03.4.g09480_p1	.	.	.	Zosma01g39290	GO:0050281, GO:0019265, GO:0009853	serine-glyoxylate transaminase activity, glycine biosynthetic process, by transamination of glyoxylate, photorespiration
OG0000224	Wa8730a001g001950	AT3G06010.1,AT5G19310.1,AT2G13370.1,AT3G54460.1	Ms11t304240.1,Ms08t215740.1,Ms08t235280.1	CKAN_02302400,CKAN_02340100,CKAN_02513200,CKAN_00456000	COCNU_HT001RO01_16T002380,COCNU_HT001RO01_04T008520	lm5633.a03.4.g09460_p1	LOC_Os05g05780.1,LOC_Os07g46590.1,LOC_Os03g22900.1	Glyma.14G033600.2,Glyma.02G281000.9	Zm00001e010908_T001,Zm00001e038194_T001,Zm00001e007521_T001	Zosma02g25490,Zosma03g30710,Zosma05g20100	GO:1900192, GO:0009506, GO:0055044	positive regulation of single-species biofilm formation, plasmodesma, symplast
OG0000225	Wa8730a001g001960	.	Ms06t157000.1	CKAN_02405000,CKAN_00101100	.	.	LOC_Os05g06070.1	.	.	Zosma05g20220	GO:0005615, GO:0004197, GO:0005764	extracellular space, cysteine-type endopeptidase activity, lysosome
OG0000226	Wa8730a001g001970	AT3G47930.1,AT1G54215.1	Ms03t054520.1,Ms06t166370.1,Ms11t312260.1	CKAN_00101100,CKAN_00780100	COCNU_HT001RO01_16T002280	.	LOC_Os05g06070.1	Glyma.02G149200.1	Zm00001e021106_T001	Zosma01g27340	GO:0016593, GO:0080049, GO:0016633	Cdc73/Paf1 complex, L-gulono-1,4-lactone dehydrogenase activity, galactonolactone dehydrogenase activity
OG0000227	Wa8730a001g001980	.	.	.	.	.	.	.	.	.
OG0000228	Wa8730a001g001990	AT5G19120.1,AT1G03220.1	Ms08t215320.1	CKAN_02298700	COCNU_HT001RO01_16T001200	lm5633.a03.4.g09390_p1	LOC_Os05g33400.1,LOC_Os01g71140.1	Glyma.10G025600.3,Glyma.03G151900.1,Glyma.02G148200.1	.	Zosma01g20670	GO:0030163, -, GO:0004190	protein catabolic process, 0, aspartic-type endopeptidase activity
OG0000229	Wa8730a001g002000	.	.	CKAN_02473400,CKAN_02514300	COCNU_HT001RO01_16T002280	.	.	Glyma.03G151400.2,Glyma.19G153900.1	Zm00001e021106_T001	Zosma01g27340	GO:0016591, GO:0016593, GO:0009910	RNA polymerase II, holoenzyme, Cdc73/Paf1 complex, negative regulation of flower development
OG0000230	Wa8730a001g002010	AT5G19120.1,AT1G03220.1	Ms08t215320.1	CKAN_02298800	COCNU_HT001RO01_16T001200	lm5633.a03.4.g09390_p1	LOC_Os05g33400.1,LOC_Os01g71160.1	Glyma.17G016600.1,Glyma.10G025600.3,Glyma.07G257500.1,Glyma.02G148200.1,Glyma.15G104900.1,Glyma.13G208200.1	Zm00001e031633_T001	Zosma01g20670	GO:0042802, GO:0004190, GO:0030163	identical protein binding, aspartic-type endopeptidase activity, protein catabolic process
OG0000231	Wa8730a001g002020	AT5G19120.1,AT1G03220.1	Ms08t215320.1,Ms08t228200.1	CKAN_02298800	COCNU_HT001RO01_16T001200	lm5633.a03.4.g09390_p1	LOC_Os05g33400.1,LOC_Os01g71094.1	Glyma.17G016600.1,Glyma.10G025600.3,Glyma.03G151900.1,Glyma.07G257500.1,Glyma.02G148200.1,Glyma.15G104900.1,Glyma.13G208200.1	Zm00001e031633_T001	Zosma01g20670	GO:0042802, GO:0004190, GO:0030163	identical protein binding, aspartic-type endopeptidase activity, protein catabolic process
OG0000232	Wa8730a001g002030	AT3G06130.1,AT5G19090.1	Ms11t303940.1,Ms08t214390.1,Ms08t228030.1,Ms11t312600.1,Ms11t316470.1,Ms10t271250.1	CKAN_00510400,CKAN_02405100,CKAN_02298500	COCNU_HT001RO01_16T001190,COCNU_HT001RO01_04T007740,COCNU_HT001RO01_12T004370,COCNU_HT001RO01_02T017410	lm5633.a03.4.g09380_p1	LOC_Os12g05040.1,LOC_Os11g05010.2	Glyma.17G016800.1,Glyma.07G257300.1,Glyma.10G156100.1,Glyma.20G232200.1,Glyma.15G104400.1,Glyma.13G208400.1	.	Zosma02g24490,Zosma03g17330,Zosma04g21250,Zosma04g26950,Zosma01g32410	GO:0046914, GO:0046916, GO:0030001	transition metal ion binding, cellular transition metal ion homeostasis, metal ion transport
OG0000233	Wa8730a001g002040	.	.	CKAN_02470600,CKAN_01585700	COCNU_HT001RO01_16T001170	.	.	Glyma.02G148500.10	.	.	-	0
OG0000234	Wa8730a001g002050	AT5G19070.1,AT1G03260.1	Ms09t255460.1,Ms03t065080.1	CKAN_00510300,CKAN_02404700,CKAN_02298000	COCNU_HT001RO01_16T001160,COCNU_HT001RO01_02T017330	.	LOC_Os07g46220.1	Glyma.17G017100.1,Glyma.07G257000.1,Glyma.15G104000.1,Glyma.13G208800.1	Zm00001e035735_T001,Zm00001e010883_T001	Zosma03g17310,Zosma04g15900,Zosma01g32420	-	0
OG0000235	Wa8730a001g002060	.	.	.	.	.	.	.	.	.
OG0000236	Wa8730a001g002070	.	.	.	.	.	.	.	.	.
OG0000237	Wa8730a001g002080	.	.	.	.	.	.	.	.	.
OG0000238	Wa8730a001g002090	.	.	.	.	.	.	.	.	.
OG0000239	Wa8730a001g002100	.	.	.	.	.	.	.	.	.
OG0000240	Wa8730a001g002110	AT2G48160.1,AT1G03270.1,AT3G63070.1	Ms08t212100.1,Ms03t071170.1,Ms06t158480.1	CKAN_02470500,CKAN_00510000,CKAN_02404200,CKAN_02297500	COCNU_HT001RO01_16T001090,COCNU_HT001RO01_02T017390	lm5633.a03.4.g09170_p1	LOC_Os05g32850.1,LOC_Os07g46180.1	Glyma.17G017700.1,Glyma.10G024500.1,Glyma.03G151400.2,Glyma.07G256500.1,Glyma.19G154200.6,Glyma.02G149200.1,Glyma.15G103700.1	Zm00001e031607_T002,Zm00001e038169_T002	Zosma01g27360,Zosma04g15840	GO:0005739, GO:0005634, -	mitochondrion, nucleus, 0
OG0000241	Wa8730a001g002120	AT3G06150.1,AT5G19060.1	.	CKAN_00510200	COCNU_HT001RO01_16T001240	lm5633.a03.4.g09160_p1	LOC_Os05g32960.1	Glyma.17G017200.1,Glyma.07G256900.1,Glyma.15G103900.1,Glyma.13G208900.1	Zm00001e031608_T001	Zosma02g25720	-	0
OG0000242	Wa8730a001g002130	.	.	CKAN_02404600	.	.	.	.	.	.	-	0
OG0000243	Wa8730a001g002140	.	.	CKAN_02298800	COCNU_HT001RO01_16T001200	lm5633.a03.4.g09390_p1	LOC_Os05g33430.1	Glyma.17G016600.1,Glyma.03G151900.1	.	.	-	0
OG0000244	Wa8730a001g002150	AT5G19120.1,AT1G03230.1	Ms08t215320.1	CKAN_02298800	COCNU_HT001RO01_16T001200	lm5633.a03.4.g09390_p1	LOC_Os05g33400.1,LOC_Os01g71160.1	Glyma.17G016500.1,Glyma.10G025600.3,Glyma.02G148200.1	Zm00001e031633_T001	Zosma01g20670	GO:0030163, GO:0004190, -	protein catabolic process, aspartic-type endopeptidase activity, 0
OG0000245	Wa8730a001g002160	AT5G19120.1,AT1G03220.1	Ms08t215320.1,Ms08t228200.1	CKAN_02298800	COCNU_HT001RO01_16T001200	lm5633.a03.4.g09390_p1	LOC_Os05g33400.1,LOC_Os01g71094.1	Glyma.17G016600.1,Glyma.10G025600.3,Glyma.03G151900.1,Glyma.07G257500.1,Glyma.02G148200.1,Glyma.15G104900.1,Glyma.13G208200.1	Zm00001e031633_T001	Zosma01g20670	GO:0042802, GO:0004190, GO:0030163	identical protein binding, aspartic-type endopeptidase activity, protein catabolic process
OG0000246	Wa8730a001g002170	AT3G60770.1	Ms01t009570.1	.	.	.	.	.	.	.	GO:0003735, GO:0070181, GO:0022627	structural constituent of ribosome, small ribosomal subunit rRNA binding, cytosolic small ribosomal subunit
OG0000247	Wa8730a001g002180	AT5G19120.1,AT1G03220.1	Ms08t215320.1	CKAN_02298800	COCNU_HT001RO01_16T001200	lm5633.a03.4.g09390_p1	LOC_Os05g33400.1,LOC_Os01g71094.1	Glyma.17G016600.1,Glyma.10G025600.3,Glyma.03G151900.1,Glyma.02G148200.1,Glyma.15G104900.1	Zm00001e031633_T001	Zosma01g20670	GO:0030163, GO:0004190, -	protein catabolic process, aspartic-type endopeptidase activity, 0
OG0000248	Wa8730a001g002190	AT5G19120.1,AT1G03220.1	Ms08t215320.1,Ms08t228200.1	CKAN_02298800	COCNU_HT001RO01_16T001200	lm5633.a03.4.g09390_p1	LOC_Os05g33400.1,LOC_Os01g71094.1	Glyma.17G016600.1,Glyma.10G025600.3,Glyma.03G151900.1,Glyma.07G257500.1,Glyma.02G148200.1,Glyma.15G104900.1,Glyma.13G208200.1	Zm00001e031633_T001	Zosma01g20670	GO:0042802, GO:0004190, GO:0030163	identical protein binding, aspartic-type endopeptidase activity, protein catabolic process
OG0000249	Wa8730a001g002200	AT1G03330.1	Ms08t212070.1,Ms11t311060.1	CKAN_02295900	COCNU_HT001RO01_16T001570,COCNU_HT001RO01_04T007580	lm5633.a03.4.g09290_p1	.	Glyma.03G150900.1,Glyma.19G153500.1	.	Zosma02g24540	GO:1990726, GO:0071011, GO:0005688	Lsm1-7-Pat1 complex, precatalytic spliceosome, U6 snRNP
OG0000250	Wa8730a001g002210	AT3G06190.1,AT5G19000.3	Ms06t166120.1,Ms06t158470.1	CKAN_02403800,CKAN_02295600	COCNU_HT001RO01_02T017480	lm5633.a03.15.g06570_p1	LOC_Os07g46160.1,LOC_Os06g45730.1	Glyma.10G024300.1,Glyma.03G150800.1,Glyma.19G153400.1,Glyma.02G149600.1	Zm00001e035737_T001,Zm00001e010888_T002	Zosma02g20660,Zosma03g17350,Zosma04g20790	GO:0005634, GO:0071472, GO:0042631	nucleus, cellular response to salt stress, cellular response to water deprivation
OG0000251	Wa8730a001g002220	AT4G30880.1	.	CKAN_01589700	.	lm5633.a03.4.g09270_p1	.	.	.	.	-	0
OG0000252	Wa8730a001g002230	AT3G05240.1,AT5G19020.1,AT4G02750.1,AT2G13600.1,AT4G31070.1,AT1G13410.1	Ms05t144100.1,Ms08t212580.1,Ms09t255100.1,Ms08t214140.1,Ms02t024530.1,Ms06t159600.1,Ms10t297670.1	CKAN_02451100,CKAN_01397400,CKAN_00112000,CKAN_01586800,CKAN_00335400	COCNU_HT001RO01_01T001210,COCNU_HT001RO01_12T003110,COCNU_HT001RO01_07T005000	lm5633.a03.4.g09260_p1	LOC_Os05g06150.1,LOC_Os01g29430.1,LOC_Os06g12360.1	Glyma.15G103100.1	Zm00001e031660_T001,Zm00001e007597_T001	Zosma06g16590,Zosma03g17390,Zosma04g16040,Zosma03g32340,Zosma01g20950,Zosma04g26790,Zosma03g13280,Zosma05g20180,Zosma01g14000,Zosma06g26340,Zosma02g06210,Zosma01g17040	GO:0003723, GO:0004519, GO:0090305	RNA binding, endonuclease activity, nucleic acid phosphodiester bond hydrolysis
OG0000253	Wa8730a001g002240	AT2G48010.1,AT1G54820.1,AT1G69730.1	Ms08t211060.1,Ms11t320720.1,Ms08t238950.1,Ms03t071220.1,Ms05t123770.1,Ms02t025060.1,Ms06t157030.1,Ms01t004240.1	CKAN_02469900,CKAN_00509800,CKAN_00844600,CKAN_00100900	COCNU_HT001RO01_16T001510,COCNU_HT001RO01_04T007450,COCNU_HT001RO01_01T002830,COCNU_HT001RO01_12T003440,COCNU_HT001RO01_15T002000,COCNU_HT001RO01_02T017770,COCNU_HT001RO01_01T017700,COCNU_HT001RO01_07T005170	lm5633.a03.4.g09250_p1	LOC_Os05g33080.1,LOC_Os01g28730.1,LOC_Os01g44110.1,LOC_Os12g34320.1	Glyma.03G149000.1,Glyma.10G156200.2,Glyma.19G152300.1,Glyma.20G232100.1	Zm00001e031617_T001,Zm00001e031350_T001,Zm00001e035913_T001,Zm00001e026888_T003,Zm00001e001757_T001	Zosma02g21030,Zosma01g37070,Zosma05g00900,Zosma04g21310,Zosma03g32090,Zosma01g20420,Zosma01g39130,Zosma03g20500,Zosma03g13875,Zosma04g25750,Zosma01g32370,Zosma02g06860,Zosma05g04460	GO:0010068, GO:0007178, GO:0004675	protoderm histogenesis, transmembrane receptor protein serine/threonine kinase signaling pathway, transmembrane receptor protein serine/threonine kinase activity
OG0000254	Wa8730a001g002250	AT1G03310.1	Ms06t158500.1	.	COCNU_HT001RO01_16T000980	lm5633.a03.4.g09240_p1	LOC_Os05g32710.1	Glyma.03G151200.1,Glyma.19G153700.1	Zm00001e031605_T001	Zosma01g13880	GO:0010021, GO:0043033, GO:0005983	amylopectin biosynthetic process, isoamylase complex, starch catabolic process
OG0000255	Wa8730a001g002260	.	Ms08t211040.1,Ms08t214990.1,Ms11t311090.1,Ms03t072000.1,Ms02t024830.1	CKAN_00109500	.	.	LOC_Os06g11330.1,LOC_Os06g45650.1	Glyma.18G143800.1	.	Zosma01g27170,Zosma05g01330,Zosma04g15930,Zosma03g13460	GO:0048530, GO:0000900, GO:0003700	fruit morphogenesis, translation repressor activity, mRNA regulatory element binding, DNA-binding transcription factor activity
OG0000257	Wa8730a001g002270	.	Ms05t141340.1,Ms09t254000.1,Ms08t214990.1,Ms11t311090.1,Ms02t024830.1,Ms10t297320.1	CKAN_00109500	.	.	LOC_Os06g11330.1,LOC_Os02g49840.1,LOC_Os06g45650.1	Glyma.06G095700.1	.	Zosma01g27170,Zosma05g01290,Zosma04g15930,Zosma03g13460,Zosma04g25310,Zosma02g06390	GO:0009908, GO:0010077, GO:0003700	flower development, maintenance of inflorescence meristem identity, DNA-binding transcription factor activity
OG0000259	Wa8730a001g002280	.	Ms09t253690.1,Ms08t214990.1,Ms02t024830.1,Ms10t297320.1	CKAN_00109500	.	.	LOC_Os06g11330.1,LOC_Os02g49840.3,LOC_Os06g45650.1	Glyma.06G095700.2	.	Zosma01g27170	GO:0017148, GO:0000900, GO:0009910	negative regulation of translation, translation repressor activity, mRNA regulatory element binding, negative regulation of flower development
OG0000260	Wa8730a001g002290	.	.	.	.	.	.	.	.	.
OG0000261	Wa8730a001g002300	AT1G65290.1,AT1G54630.1	Ms09t255350.1,Ms08t228240.1,Ms02t024360.1,Ms01t004560.1	.	COCNU_HT001RO01_16T002510	lm5633.a03.4.g09310_p1	LOC_Os05g31290.1,LOC_Os03g22950.1,LOC_Os07g12150.1	Glyma.19G240100.1	Zm00001e031545_T001	Zosma04g20710,Zosma01g13720	GO:0006633, GO:0009245, GO:0000035	fatty acid biosynthetic process, lipid A biosynthetic process, acyl binding
OG0000262	Wa8730a001g002310	AT3G60540.1	Ms11t321010.1	.	.	lm5633.a03.4.g09330_p1	.	Glyma.12G171400.1,Glyma.11G155259.1	.	Zosma04g25670,Zosma01g17440	GO:0031204, GO:0031205, GO:0006616	posttranslational protein targeting to membrane, translocation, endoplasmic reticulum Sec complex, SRP-dependent cotranslational protein targeting to membrane, translocation
OG0000263	Wa8730a001g002320	.	.	.	.	.	.	.	.	.
OG0000264	Wa8730a001g002330	AT2G48110.1,AT3G23590.1	Ms11t321160.1	CKAN_02296300	COCNU_HT001RO01_04T007570,COCNU_HT001RO01_16T005460	lm5633.a03.4.g09350_p1	LOC_Os07g11000.1	Glyma.03G151100.2,Glyma.19G153600.3,Glyma.15G102800.1,Glyma.13G209800.1	Zm00001e031371_T001,Zm00001e035871_T002,Zm00001e010985_T001	Zosma01g32360	GO:0009698, GO:2000762, GO:0044451	phenylpropanoid metabolic process, regulation of phenylpropanoid metabolic process, obsolete nucleoplasm part
OG0000265	Wa8730a001g002340	AT1G13040.2	Ms05t141430.1,Ms03t053900.1,Ms08t210980.1,Ms02t026240.1,Ms10t297050.1	CKAN_02448300,CKAN_01393200,CKAN_00798400,CKAN_02425700,CKAN_01586600	COCNU_HT001RO01_04T007320,COCNU_HT001RO01_05T007330	lm5633.a03.4.g09300_p1	LOC_Os05g32730.1,LOC_Os07g48850.1,LOC_Os03g24880.1	Glyma.08G131100.1	Zm00001e035905_T001	Zosma01g37400,Zosma01g26920,Zosma02g25750,Zosma05g01060,Zosma03g32160,Zosma01g17450	GO:0004519, GO:0009451, GO:0090305	endonuclease activity, RNA modification, nucleic acid phosphodiester bond hydrolysis
OG0000266	Wa8730a001g002350	AT3G56640.1	Ms08t212570.1	CKAN_00838900,CKAN_00446800	.	lm5633.a03.4.g09280_p1	.	Glyma.02G160300.1	.	Zosma03g31360,Zosma01g17050	GO:0099568, GO:0005938, GO:0000145	cytoplasmic region, cell cortex, exocyst
OG0000268	Wa8730a001g002360	AT4G31530.1	Ms03t064370.1	.	COCNU_HT001RO01_04T008480	.	LOC_Os03g23980.1	.	Zm00001e001698_T003,Zm00001e038183_T001	Zosma01g39250,Zosma04g27240	-	0
OG0000269	Wa8730a001g002370	AT4G02820.1,AT5G27460.1,AT1G13040.1	Ms03t053900.1,Ms11t321320.1,Ms08t227910.1,Ms01t010030.1	CKAN_02448300,CKAN_01394700,CKAN_00108200,CKAN_01586600	COCNU_HT001RO01_04T007670,COCNU_HT001RO01_07T004710	lm5633.a03.4.g09420_p1	LOC_Os07g12140.1,LOC_Os12g34340.1	Glyma.10G026151.1	Zm00001e039746_T002	Zosma01g26920,Zosma01g20550,Zosma03g20650,Zosma03g15130,Zosma01g32790,Zosma05g04470,Zosma01g17450	GO:0090305, GO:0004519, GO:0009451	nucleic acid phosphodiester bond hydrolysis, endonuclease activity, RNA modification
OG0000270	Wa8730a001g002380	AT2G48060.2	Ms04t094360.1	CKAN_00507300	.	.	.	Glyma.10G023700.1,Glyma.19G238300.5,Glyma.02G150200.1	Zm00001e017676_T001	Zosma01g27300	GO:0005261, GO:0008381, GO:0071260	cation channel activity, mechanosensitive ion channel activity, cellular response to mechanical stimulus
OG0000271	Wa8730a001g002390	.	.	CKAN_00507300	.	.	.	Glyma.10G023700.1,Glyma.19G238300.5,Glyma.02G150200.1	.	Zosma01g27300	GO:0050982, GO:0071260, GO:0008381	detection of mechanical stimulus, cellular response to mechanical stimulus, mechanosensitive ion channel activity
OG0000272	Wa8730a001g002400	AT5G54810.1,AT4G27070.1	.	CKAN_01395000,CKAN_02422100	COCNU_HT001RO01_12T003480	lm5633.a03.4.g09060_p1	.	.	.	Zosma03g32070	GO:0009684, GO:0000162, GO:0004834	indoleacetic acid biosynthetic process, tryptophan biosynthetic process, tryptophan synthase activity
OG0000273	Wa8730a001g002410	AT3G06290.2	Ms05t144040.1	CKAN_00508100,CKAN_00449500	COCNU_HT001RO01_16T002770,COCNU_HT001RO01_01T017230	lm5633.a03.4.g09080_p1	LOC_Os07g45160.1,LOC_Os03g22870.1	Glyma.15G100800.1,Glyma.13G211900.1	Zm00001e035716_T004,Zm00001e038198_T001	Zosma04g20760	GO:0044030, GO:1900368, GO:0090065	regulation of DNA methylation, regulation of RNA interference, regulation of production of siRNA involved in RNA interference
OG0000274	Wa8730a001g002420	AT5G27570.1	.	.	.	.	.	.	.	.	GO:0019900, GO:0033597, GO:0080008	kinase binding, mitotic checkpoint complex, Cul4-RING E3 ubiquitin ligase complex
OG0000275	Wa8730a001g002430	.	Ms08t211990.1	CKAN_00508000,CKAN_02402900	COCNU_HT001RO01_01T017220	lm5633.a03.4.g09090_p1	LOC_Os05g33510.1,LOC_Os03g24600.1	Glyma.15G100700.1,Glyma.13G212000.1	Zm00001e027103_T001,Zm00001e001736_T001	Zosma04g21010	GO:0000304, GO:0033743, -	response to singlet oxygen, peptide-methionine (R)-S-oxide reductase activity, 0
OG0000276	Wa8730a001g002440	AT1G66590.1,AT1G69750.1	.	.	.	lm5633.a03.4.g09120_p1	.	.	.	Zosma06g24700	-	0
OG0000277	Wa8730a001g002450	.	.	.	.	lm5633.a03.4.g09130_p1	.	Glyma.06G236200.1,Glyma.12G162300.2	.	Zosma06g25340	GO:0044434, GO:0009941, GO:0009570	obsolete chloroplast part, chloroplast envelope, chloroplast stroma
OG0000278	Wa8730a001g002460	AT3G05327.1,AT3G63120.2,AT3G60550.1	Ms11t322010.1,Ms05t123990.1,Ms04t107900.1	CKAN_02302700	.	lm5633.a03.4.g09140_p1	LOC_Os05g33040.3	Glyma.03G153800.1,Glyma.19G235700.1,Glyma.19G156200.1	Zm00001e031615_T001	Zosma01g20540	-	0
OG0000279	Wa8730a001g002470	AT3G05290.1,AT5G27520.1	Ms08t228090.1,Ms05t123980.1,Ms10t271130.1	CKAN_00512400,CKAN_02301600	COCNU_HT001RO01_16T001360,COCNU_HT001RO01_02T017130	lm5633.a03.4.g09150_p1	LOC_Os05g32630.1	.	Zm00001e031600_T001,Zm00001e027201_T001	Zosma02g25640	GO:0005777, GO:0006839, GO:0005743	peroxisome, mitochondrial transport, mitochondrial inner membrane
OG0000280	Wa8730a001g002480	AT1G66750.1	Ms03t054470.1,Ms09t255500.1,Ms11t322030.1	CKAN_02470100	COCNU_HT001RO01_02T016930	lm5633.a03.4.g09150_p1,lm5633.a03.15.g05640_p1	LOC_Os05g32600.1	Glyma.05G243000.10	Zm00001e031597_T001,Zm00001e027200_T003	Zosma02g25660,Zosma01g20110,Zosma01g32070,Zosma05g25230	GO:0070985, GO:0045944, GO:0016591	transcription factor TFIIK complex, positive regulation of transcription by RNA polymerase II, RNA polymerase II, holoenzyme
OG0000281	Wa8730a001g002490	.	.	CKAN_00512100	COCNU_HT001RO01_04T007680	.	LOC_Os11g05100.1	.	.	Zosma05g04680	-	0
OG0000282	Wa8730a001g002500	.	.	CKAN_00511900	COCNU_HT001RO01_04T007660	.	.	.	.	Zosma03g15390	GO:0042274, GO:0032040, GO:0000462	ribosomal small subunit biogenesis, small-subunit processome, maturation of SSU-rRNA from tricistronic rRNA transcript (SSU-rRNA, 5.8S rRNA, LSU-rRNA)
OG0000283	Wa8730a001g002510	AT5G19220.1	Ms01t005140.1	CKAN_02406000,CKAN_02301300	.	lm5633.a03.4.g08920_p1	LOC_Os01g44220.1	Glyma.17G015600.1,Glyma.07G258500.1	Zm00001e001735_T001	Zosma01g37510,Zosma04g26960	GO:0009507, GO:0009501, GO:0008878	chloroplast, amyloplast, glucose-1-phosphate adenylyltransferase activity
OG0000284	Wa8730a001g002520	AT3G05260.1,AT1G54870.2	Ms02t025960.1,Ms11t311140.1,Ms06t158740.1,Ms04t107960.1	CKAN_02400900,CKAN_02301000	.	lm5633.a03.4.g08930_p1	LOC_Os05g04870.1	Glyma.19G238900.1,Glyma.03G238800.2,Glyma.07G258200.2,Glyma.10G155300.1,Glyma.20G233000.1	.	Zosma01g37870,Zosma01g29330,Zosma04g20700	GO:0004496, GO:0008106, GO:0055114	mevalonate kinase activity, alcohol dehydrogenase (NADP+) activity, obsolete oxidation-reduction process
OG0000285	Wa8730a001g002530	.	.	.	.	.	.	.	.	.
OG0000287	Wa8730a001g002540	AT1G08980.1	Ms03t054480.1	CKAN_00511600	COCNU_HT001RO01_16T001310,COCNU_HT001RO01_15T002200,COCNU_HT001RO01_05T007080	lm5633.a03.4.g08910_p1	.	Glyma.10G155400.1,Glyma.20G232900.1	.	Zosma03g17020	GO:0009684, GO:0043864, GO:0004040	indoleacetic acid biosynthetic process, indoleacetamide hydrolase activity, amidase activity
OG0000288	Wa8730a001g002550	.	Ms08t228080.1	.	COCNU_HT001RO01_02T016880	.	.	.	.	Zosma05g20420	GO:0010089, GO:0097100, GO:2000033	xylem development, supercoiled DNA binding, regulation of seed dormancy process
OG0000289	Wa8730a001g002560	.	.	.	.	.	.	Glyma.17G015900.2	.	.	-	0
OG0000290	Wa8730a001g002570	AT5G19180.1	Ms08t228040.1,Ms05t123950.1,Ms10t271240.1,Ms10t296710.1	CKAN_02466600,CKAN_00511200	COCNU_HT001RO01_16T001210,COCNU_HT001RO01_02T017250	lm5633.a03.4.g08840_p1	.	Glyma.17G016000.1,Glyma.07G258000.1	.	Zosma03g20620	GO:0045116, GO:0019781, GO:0046982	protein neddylation, NEDD8 activating enzyme activity, protein heterodimerization activity
OG0000291	Wa8730a001g002580	.	.	CKAN_02300200	COCNU_HT001RO01_15T001930	lm5633.a03.4.g08870_p1	.	.	.	.	GO:0070940, GO:0006369, GO:0008420	dephosphorylation of RNA polymerase II C-terminal domain, termination of RNA polymerase II transcription, RNA polymerase II CTD heptapeptide repeat phosphatase activity
OG0000292	Wa8730a001g002590	AT3G06100.1	Ms10t297030.1,Ms04t107860.1	CKAN_02405300	COCNU_HT001RO01_16T001060,COCNU_HT001RO01_05T007370	lm5633.a03.4.g08880_p1	LOC_Os06g12310.1	.	.	Zosma02g05770	GO:0006833, GO:0005887, GO:0044459	water transport, integral component of plasma membrane, obsolete plasma membrane part
OG0000293	Wa8730a001g002600	.	.	.	COCNU_HT001RO01_01T003490	.	LOC_Os11g04954.1	.	.	.	GO:0000400, GO:0000150, GO:0042148	four-way junction DNA binding, recombinase activity, strand invasion
OG0000294	Wa8730a001g002610	AT4G15530.1	Ms05t144060.1,Ms02t026360.1,Ms03t071300.1	CKAN_02293100	COCNU_HT001RO01_01T017450	.	LOC_Os05g33570.1	Glyma.17G020600.1,Glyma.07G253700.1	Zm00001e031643_T001,Zm00001e027091_T001	Zosma02g25610,Zosma01g20510	GO:0009570, GO:0044434, GO:0044435	chloroplast stroma, obsolete chloroplast part, obsolete plastid part
OG0000295	Wa8730a001g002620	AT2G48030.1,AT3G21530.2	Ms08t211960.1,Ms02t026370.1	CKAN_02468800,CKAN_00507100	COCNU_HT001RO01_01T017420	.	LOC_Os07g45100.1,LOC_Os03g24610.1	Glyma.10G023500.1,Glyma.03G149500.1,Glyma.19G152500.1,Glyma.02G150500.5,Glyma.15G100400.1,Glyma.13G212300.1	Zm00001e035715_T001	Zosma01g20490	-	0
OG0000296	Wa8730a001g002630	AT5G27370.1,AT3G21550.1	Ms05t143520.1,Ms11t321730.1,Ms04t094350.1,Ms07t182540.1	CKAN_00507000,CKAN_02402500	COCNU_HT001RO01_01T002870,COCNU_HT001RO01_12T001490,COCNU_HT001RO01_01T017400	lm5633.a03.4.g09040_p1	LOC_Os07g45080.1,LOC_Os01g27120.1,LOC_Os03g25440.1	Glyma.17G020900.1,Glyma.07G253500.1,Glyma.13G212400.1	Zm00001e010873_T002	Zosma02g24790,Zosma03g16960,Zosma01g13930	GO:0009838, GO:0000325, GO:0010256	abscission, plant-type vacuole, endomembrane system organization
OG0000297	Wa8730a001g002640	AT3G23240.1	Ms05t136750.1,Ms05t123290.1,Ms04t097790.1	CKAN_00797700,CKAN_01744500	.	lm5633.a03.11.g04460_p1	LOC_Os03g08500.1	Glyma.19G248900.1	.	Zosma02g19570,Zosma05g20760,Zosma05g29780,Zosma02g05840,Zosma05g25520	GO:0003700, GO:0009873, GO:0071369	DNA-binding transcription factor activity, ethylene-activated signaling pathway, cellular response to ethylene stimulus
OG0000298	Wa8730a001g002650	AT3G05140.1,AT2G48010.1,AT4G02630.1,AT1G66880.1	Ms05t141330.1,Ms08t213080.1,Ms02t025860.1,Ms08t238950.1,Ms03t069900.1,Ms05t122920.1,Ms10t281850.1,Ms06t157030.1,Ms04t099790.1	CKAN_02468600,CKAN_00506500,CKAN_02402300,CKAN_01393900,CKAN_02291900,CKAN_00798800,CKAN_00109700	COCNU_HT001RO01_01T002830,COCNU_HT001RO01_12T003440	lm5633.a03.4.g09010_p1	LOC_Os01g28730.1,LOC_Os06g45630.1	Glyma.10G023400.1,Glyma.03G149000.1,Glyma.19G152200.1,Glyma.02G150600.1	Zm00001e026888_T003	Zosma01g29150,Zosma02g03700,Zosma04g20920,Zosma03g32090,Zosma01g20420,Zosma01g39370,Zosma03g18400,Zosma03g13875,Zosma05g19560,Zosma01g32370,Zosma05g25160,Zosma05g04990,Zosma01g18430	GO:0046777, GO:0004675, GO:0007178	protein autophosphorylation, transmembrane receptor protein serine/threonine kinase activity, transmembrane receptor protein serine/threonine kinase signaling pathway
OG0000299	Wa8730a001g002660	.	.	.	.	.	.	.	.	.
OG0000300	Wa8730a001g002670	AT4G15545.1	Ms11t321370.1	CKAN_00506400	COCNU_HT001RO01_scaffold006566T000140	lm5633.a03.4.g09000_p1	LOC_Os05g33620.1	Glyma.17G021100.1,Glyma.07G253300.1,Glyma.15G100200.1	Zm00001e031635_T001,Zm00001e027087_T002	Zosma06g21040,Zosma03g20270,Zosma05g19780	GO:0005886, GO:0022857, GO:0055085	plasma membrane, transmembrane transporter activity, transmembrane transport
OG0000301	Wa8730a001g002680	AT1G03380.1,AT1G54710.1,AT5G54730.1	Ms10t281240.1,Ms06t158460.1	CKAN_02468500,CKAN_00506300	COCNU_HT001RO01_scaffold006566T000130,COCNU_HT001RO01_01T017340	.	LOC_Os05g33610.1	Glyma.03G148700.1,Glyma.19G152000.15	Zm00001e031636_T001,Zm00001e027088_T001	Zosma01g20390	GO:0007030, GO:0000226, GO:0035239	Golgi organization, microtubule cytoskeleton organization, tube morphogenesis
OG0000302	Wa8730a001g002690	AT5G18860.1	Ms10t281310.1	CKAN_02402100,CKAN_02291600	COCNU_HT001RO01_scaffold006566T000120,COCNU_HT001RO01_01T016930	lm5633.a03.4.g08990_p1	LOC_Os05g33644.1	Glyma.17G021400.1,Glyma.07G253000.3,Glyma.13G213000.1	Zm00001e027086_T001	Zosma02g25620,Zosma02g05570	-	0
OG0000303	Wa8730a001g002700	AT3G05660.1,AT1G03440.1,AT4G03010.1	Ms05t143530.1,Ms06t166080.1,Ms11t310730.1,Ms03t070220.1,Ms06t158450.1,Ms10t270960.1,Ms03t064280.1,Ms04t098020.1	CKAN_02402000,CKAN_02291500,CKAN_01583900	COCNU_HT001RO01_01T002800,COCNU_HT001RO01_12T001530,COCNU_HT001RO01_01T016960	lm5633.a03.4.g08980_p1,lm5633.a03.15.g05880_p1,lm5633.a03.11.g04820_p1	LOC_Os05g33690.1,LOC_Os03g21730.1,LOC_Os11g42450.1	Glyma.10G023100.1,Glyma.03G148500.1,Glyma.19G151800.1,Glyma.02G150900.3	Zm00001e027076_T001,Zm00001e021093_T001	Zosma02g21730,Zosma01g29180,Zosma06g20830,Zosma01g20370,Zosma05g19560,Zosma05g29700,Zosma01g13870	GO:0048281, GO:0010148, GO:0009955	inflorescence morphogenesis, transpiration, adaxial/abaxial pattern specification
OG0000304	Wa8730a001g002710	.	.	.	COCNU_HT001RO01_15T001700	lm5633.a03.4.g08970_p1	LOC_Os11g42490.1	.	.	.	GO:0046835, GO:0004856, GO:0005997	carbohydrate phosphorylation, xylulokinase activity, xylulose metabolic process
OG0000305	Wa8730a001g002720	.	Ms02t026980.1	CKAN_00504700	COCNU_HT001RO01_12T001640	lm5633.a03.4.g08940_p1	LOC_Os11g42540.1	.	.	.	-	0
OG0000306	Wa8730a001g002730	AT4G03020.1	Ms03t070240.1,Ms10t281330.1	CKAN_02291400	COCNU_HT001RO01_01T002780,COCNU_HT001RO01_scaffold006566T000150	lm5633.a03.4.g08950_p1	LOC_Os05g33710.1,LOC_Os05g05210.2,LOC_Os01g28680.3	Glyma.10G023000.1,Glyma.02G151002.1,Glyma.15G099700.5,Glyma.13G213100.1	Zm00001e027079_T002	Zosma01g20360	-	0
OG0000307	Wa8730a001g002740	AT3G05520.2	Ms11t308780.1	.	COCNU_HT001RO01_04T009950	lm5633.a03.4.g07730_p1	.	Glyma.19G233300.1,Glyma.03G235500.1	Zm00001e035833_T002,Zm00001e010953_T001	.	-	0
OG0000308	Wa8730a001g002750	AT3G05340.1,AT1G09190.1,AT2G13600.1	Ms05t144100.1,Ms03t053880.1,Ms08t212690.1,Ms09t254820.1,Ms08t215680.1,Ms06t166520.1,Ms11t321950.1,Ms02t026070.1,Ms11t309250.1,Ms01t018300.1,Ms10t297110.1,Ms04t097880.1	CKAN_00513200,CKAN_02290200	COCNU_HT001RO01_16T003480,COCNU_HT001RO01_04T009410,COCNU_HT001RO01_01T002130,COCNU_HT001RO01_12T003550,COCNU_HT001RO01_02T015950,COCNU_HT001RO01_05T007690	lm5633.a03.4.g07720_p1,lm5633.a03.11.g04780_p1	LOC_Os05g30710.1,LOC_Os05g05490.1,LOC_Os07g47370.1,LOC_Os06g12510.1,LOC_Os03g25380.1,LOC_Os02g49830.1,LOC_Os12g36620.1	Glyma.03G238000.1	Zm00001e031396_T001,Zm00001e035817_T001	Zosma02g20140,Zosma04g22120,Zosma03g18530,Zosma05g19660,Zosma05g33840,Zosma05g30080,Zosma01g17040	GO:0003723, GO:0090305, GO:0004519	RNA binding, nucleic acid phosphodiester bond hydrolysis, endonuclease activity
OG0000309	Wa8730a001g002760	AT2G47790.1	.	CKAN_02462700	.	lm5633.a03.4.g07710_p1	.	Glyma.03G213700.1,Glyma.19G210500.1	.	.	GO:1900140, GO:0010029, GO:0040008	regulation of seedling development, regulation of seed germination, regulation of growth
OG0000310	Wa8730a001g002770	AT1G50940.1	Ms11t314990.1	CKAN_00498600	COCNU_HT001RO01_12T002090	.	.	.	.	Zosma01g18150	GO:0033539, GO:0009055, GO:0050660	fatty acid beta-oxidation using acyl-CoA dehydrogenase, electron transfer activity, flavin adenine dinucleotide binding
OG0000311	Wa8730a001g002780	AT5G27680.1	Ms08t212680.1	CKAN_00498500	COCNU_HT001RO01_01T002140	.	LOC_Os05g05810.1	Glyma.20G236000.1	Zm00001e027506_T001	Zosma04g22180	GO:0032508, GO:0000724, GO:0008094	DNA duplex unwinding, double-strand break repair via homologous recombination, DNA-dependent ATPase activity
OG0000312	Wa8730a001g002790	AT5G27680.1	Ms08t212680.1,Ms10t281580.1	CKAN_00498500	COCNU_HT001RO01_01T002140	lm5633.a03.4.g08020_p1	LOC_Os05g05810.1,LOC_Os07g48360.1	Glyma.20G236000.7	Zm00001e027506_T001	Zosma01g28950,Zosma04g22180	GO:0043138, GO:0008094, GO:0032508	3'-5' DNA helicase activity, DNA-dependent ATPase activity, DNA duplex unwinding
OG0000313	Wa8730a001g002800	.	.	.	COCNU_HT001RO01_01T017410	.	.	Glyma.13G209700.1	.	.	-	0
OG0000314	Wa8730a001g002810	AT3G05340.1,AT5G19020.1,AT1G03540.1,AT4G02750.1,AT2G13600.1,AT5G27110.1,AT4G15720.1	Ms05t143170.1,Ms08t212580.1,Ms09t254820.1,Ms02t026070.1,Ms10t297010.1,Ms04t099950.1	CKAN_02468900,CKAN_02342500,CKAN_00493600,CKAN_01394700,CKAN_01746400	COCNU_HT001RO01_16T003480,COCNU_HT001RO01_04T009410,COCNU_HT001RO01_01T003060,COCNU_HT001RO01_12T002010,COCNU_HT001RO01_05T007270	lm5633.a03.4.g07720_p1,lm5633.a03.11.g04390_p1	LOC_Os05g30710.1,LOC_Os03g25380.1,LOC_Os01g15530.1,LOC_Os02g49830.1,LOC_Os12g36620.1	Glyma.17G024100.1,Glyma.03G148000.1,Glyma.19G151350.1,Glyma.02G160400.1,Glyma.15G093850.1,Glyma.13G218250.1	Zm00001e010919_T001,Zm00001e030926_T001	Zosma02g18560,Zosma02g21380,Zosma02g03500,Zosma04g21720,Zosma01g20160,Zosma04g26790,Zosma03g14640,Zosma05g33840	GO:0003723, GO:0090305, GO:0004519	RNA binding, nucleic acid phosphodiester bond hydrolysis, endonuclease activity
OG0000315	Wa8730a001g002820	AT3G06120.1	Ms05t122820.1	CKAN_02470800,CKAN_00510700,CKAN_02405400	.	.	.	Glyma.13G208300.1	Zm00001e026696_T001	.	GO:0008544, GO:0010374, GO:0009913	epidermis development, stomatal complex development, epidermal cell differentiation
OG0000316	Wa8730a001g002830	AT1G09070.1,AT1G12810.1	Ms08t215850.1,Ms05t116780.1,Ms11t314980.1	CKAN_02464500	COCNU_HT001RO01_16T003300,COCNU_HT001RO01_01T002100,COCNU_HT001RO01_12T002070	lm5633.a03.4.g07970_p1	LOC_Os05g30740.1,LOC_Os01g70790.1,LOC_Os07g47400.1	Glyma.07G248600.1,Glyma.15G152900.1,Glyma.09G045700.1	Zm00001e028370_T003,Zm00001e035820_T001,Zm00001e018728_T001	Zosma02g19740,Zosma01g18120	GO:0005783, GO:0006623, GO:0000326	endoplasmic reticulum, protein targeting to vacuole, protein storage vacuole
OG0000317	Wa8730a001g002840	.	Ms08t239060.1,Ms01t002730.1,Ms01t018350.1	CKAN_02343300	COCNU_HT001RO01_12T002160	lm5633.a03.4.g07860_p1	LOC_Os05g05830.1	Glyma.03G212700.4,Glyma.19G209700.1	Zm00001e027507_T001	Zosma06g24430	GO:0004488, GO:0046653, GO:0004477	methylenetetrahydrofolate dehydrogenase (NADP+) activity, tetrahydrofolate metabolic process, methenyltetrahydrofolate cyclohydrolase activity
OG0000318	Wa8730a001g002850	AT3G21400.1	Ms04t094470.1	CKAN_00498100	COCNU_HT001RO01_12T002030	lm5633.a03.4.g07940_p1	LOC_Os12g35550.2	Glyma.15G153100.1,Glyma.09G045900.1	Zm00001e039707_T001	Zosma01g29250	-	0
OG0000319	Wa8730a001g002860	AT3G05410.2	Ms08t228100.1	CKAN_02342100	COCNU_HT001RO01_16T003230	lm5633.a03.4.g07950_p1	LOC_Os01g70820.1	Glyma.10G153100.1	Zm00001e018724_T001	Zosma04g20670	GO:0044436, GO:0009579, GO:0031977	obsolete thylakoid part, thylakoid, thylakoid lumen
OG0000320	Wa8730a001g002870	AT4G02560.1	Ms11t308750.1,Ms01t004580.1	CKAN_02464600	COCNU_HT001RO01_16T003240,COCNU_HT001RO01_04T009690	lm5633.a03.4.g07960_p1	LOC_Os01g70810.1	Glyma.03G211500.1,Glyma.19G208700.1	Zm00001e018725_T003	Zosma02g19090,Zosma01g26350	GO:0048608, GO:0010228, GO:0061458	reproductive structure development, vegetative to reproductive phase transition of meristem, reproductive system development
OG0000321	Wa8730a001g002880	AT1G09060.1	Ms03t053690.1	CKAN_02397400,CKAN_01407200	COCNU_HT001RO01_04T009700	lm5633.a03.4.g07980_p1	LOC_Os03g22540.1	Glyma.10G153000.5,Glyma.20G235300.1	Zm00001e038213_T003	Zosma01g29240,Zosma05g20610	GO:0051276, GO:0000785, GO:0005654	chromosome organization, chromatin, nucleoplasm
OG0000322	Wa8730a001g002890	AT2G47810.1,AT1G09030.1,AT2G13570.1	Ms08t215800.1,Ms11t320800.1,Ms08t228110.1,Ms11t303960.1	CKAN_02464900,CKAN_02341800,CKAN_00497600	COCNU_HT001RO01_16T003170,COCNU_HT001RO01_04T009430	lm5633.a03.4.g08070_p1	LOC_Os01g70890.1	Glyma.17G025300.1,Glyma.10G020100.1,Glyma.07G249000.1,Glyma.10G153500.2,Glyma.15G153900.1,Glyma.09G046200.2,Glyma.02G154000.1,Glyma.20G234900.1	Zm00001e018715_T001	Zosma01g39080	GO:0045540, GO:0045678, GO:1990830	regulation of cholesterol biosynthetic process, positive regulation of R7 cell differentiation, cellular response to leukemia inhibitory factor
OG0000323	Wa8730a001g002900	.	Ms08t215810.1	.	.	lm5633.a03.4.g07930_p1	.	.	.	Zosma01g39160	-	0
OG0000324	Wa8730a001g002910	AT2G13540.1	Ms05t124000.1	CKAN_00497800	COCNU_HT001RO01_04T009420	lm5633.a03.4.g07910_p1	LOC_Os03g22570.1	.	Zm00001e001643_T004	.	GO:0005845, GO:0006406, GO:0071166	mRNA cap binding complex, mRNA export from nucleus, ribonucleoprotein complex localization
OG0000326	Wa8730a001g002920	AT2G47810.1,AT1G09030.1,AT2G13570.1	Ms08t215800.1,Ms11t320800.1,Ms08t228110.1,Ms11t303960.1	CKAN_02464900,CKAN_02341800,CKAN_00497600	COCNU_HT001RO01_16T003170,COCNU_HT001RO01_04T009430	lm5633.a03.4.g08070_p1	LOC_Os01g70890.1	Glyma.17G025300.1,Glyma.07G249000.1,Glyma.10G153500.2,Glyma.15G153900.1,Glyma.09G046200.2,Glyma.20G234900.1	Zm00001e018715_T001	Zosma01g39080	GO:0045540, GO:0045678, GO:1990830	regulation of cholesterol biosynthetic process, positive regulation of R7 cell differentiation, cellular response to leukemia inhibitory factor
OG0000327	Wa8730a001g002930	AT1G09030.1	Ms08t215800.1,Ms11t320800.1,Ms08t228110.1,Ms11t303960.1	CKAN_02464900,CKAN_00497600	COCNU_HT001RO01_16T003170	lm5633.a03.4.g08070_p1	LOC_Os01g70890.1	Glyma.17G025300.1,Glyma.07G249000.1,Glyma.10G153500.2,Glyma.15G153900.1,Glyma.09G046200.2,Glyma.20G234900.1	Zm00001e018715_T001	Zosma01g39080	GO:0045540, GO:0045678, GO:1990830	regulation of cholesterol biosynthetic process, positive regulation of R7 cell differentiation, cellular response to leukemia inhibitory factor
OG0000328	Wa8730a001g002940	AT2G47810.1,AT1G09030.1,AT2G13570.1	Ms08t215800.1,Ms11t320800.1,Ms08t228110.1,Ms11t303960.1	CKAN_02464900,CKAN_02341800,CKAN_00497600	COCNU_HT001RO01_16T003170,COCNU_HT001RO01_04T009430	lm5633.a03.4.g08070_p1	LOC_Os01g70890.1	Glyma.10G153500.2,Glyma.20G234900.1	.	Zosma01g39080	GO:0005634, GO:0003700, GO:0006355	nucleus, DNA-binding transcription factor activity, regulation of transcription, DNA-templated
OG0000329	Wa8730a001g002950	AT2G47810.1,AT1G09030.1,AT2G13570.1	Ms08t215800.1,Ms11t320800.1,Ms08t228110.1,Ms11t303960.1	CKAN_02464900,CKAN_02341800,CKAN_00497600	COCNU_HT001RO01_16T003170,COCNU_HT001RO01_04T009430	lm5633.a03.4.g08070_p1	LOC_Os01g70890.1	Glyma.17G025300.1,Glyma.07G249000.1,Glyma.10G153500.2,Glyma.15G153900.1,Glyma.09G046200.2,Glyma.20G234900.1	Zm00001e018715_T001	Zosma01g39080	GO:0045540, GO:0045678, GO:1990830	regulation of cholesterol biosynthetic process, positive regulation of R7 cell differentiation, cellular response to leukemia inhibitory factor
OG0000330	Wa8730a001g002960	AT2G47810.1,AT1G09030.1,AT2G13570.1	Ms08t215800.1,Ms11t320800.1,Ms08t228110.1,Ms11t303960.1	CKAN_02464900,CKAN_02341800,CKAN_00497600	COCNU_HT001RO01_16T003170,COCNU_HT001RO01_04T009430	lm5633.a03.4.g08070_p1	LOC_Os01g70890.1	Glyma.17G025300.1,Glyma.10G020100.1,Glyma.07G249000.1,Glyma.15G153900.1,Glyma.09G046200.2,Glyma.02G154000.1,Glyma.20G234900.1	Zm00001e018715_T001	Zosma01g39080	GO:0045540, GO:0045678, GO:1990830	regulation of cholesterol biosynthetic process, positive regulation of R7 cell differentiation, cellular response to leukemia inhibitory factor
OG0000332	Wa8730a001g002970	AT1G09020.1,AT2G40540.2,AT1G70300.1	Ms08t212990.1,Ms08t215790.1,Ms11t321090.1,Ms02t027090.1,Ms08t238830.1,Ms03t070050.1,Ms05t124020.1,Ms11t316840.1,Ms10t271120.1,Ms05t116640.1,Ms11t314860.1	CKAN_02465200,CKAN_02341200,CKAN_00497500,CKAN_02397800,CKAN_01399600,CKAN_02423500,CKAN_01583000	COCNU_HT001RO01_16T002840,COCNU_HT001RO01_04T009550,COCNU_HT001RO01_01T003410,COCNU_HT001RO01_12T001990,COCNU_HT001RO01_02T015940	lm5633.a03.4.g08090_p1,lm5633.a03.11.g02530_p1	LOC_Os01g70940.1,LOC_Os07g47350.2,LOC_Os01g27170.1,LOC_Os03g21890.1,LOC_Os02g49760.3,LOC_Os06g45940.1	Glyma.17G024700.3,Glyma.19G234600.1,Glyma.03G236900.1,Glyma.07G249700.1,Glyma.10G153700.1,Glyma.15G154300.1,Glyma.09G046800.6,Glyma.20G234600.3,Glyma.01G031800.1,Glyma.18G136500.1	Zm00001e026326_T002,Zm00001e028364_T003,Zm00001e035814_T003,Zm00001e018711_T001,Zm00001e030933_T001	Zosma02g18650,Zosma02g21690,Zosma06g16560,Zosma05g19720,Zosma05g29890	GO:0007031, GO:2000377, GO:0009875	peroxisome organization, regulation of reactive oxygen species metabolic process, pollen-pistil interaction
OG0000333	Wa8730a001g002980	AT2G26970.1	.	.	.	.	.	.	.	Zosma01g39180	GO:0005739, GO:0000175, GO:0090503	mitochondrion, 3'-5'-exoribonuclease activity, RNA phosphodiester bond hydrolysis, exonucleolytic
OG0000334	Wa8730a001g002990	.	.	.	COCNU_HT001RO01_04T009450	.	.	Glyma.20G234700.5	.	.	-	0
OG0000335	Wa8730a001g003000	AT3G62910.1	Ms11t310710.1	CKAN_02341300	COCNU_HT001RO01_12T001980	lm5633.a03.4.g08100_p1	LOC_Os11g43600.1	Glyma.03G210800.1,Glyma.19G208000.1	Zm00001e021069_T003	Zosma02g25880,Zosma06g21700	GO:0010027, GO:0032544, GO:0003747	thylakoid membrane organization, plastid translation, translation release factor activity
OG0000336	Wa8730a001g003010	AT5G18560.1,AT1G03800.1,AT1G12890.1	Ms08t212860.1,Ms08t238930.1,Ms03t070190.1,Ms07t197510.1,Ms01t018200.1,Ms04t094380.1,Ms07t182530.1,Ms11t312640.1,Ms04t106950.1,Ms04t098540.1	CKAN_02341100,CKAN_02397900,CKAN_00797600,CKAN_02420500,CKAN_01744500,CKAN_01583100,CKAN_00991200	COCNU_HT001RO01_16T002910,COCNU_HT001RO01_04T009590,COCNU_HT001RO01_12T002610,COCNU_HT001RO01_02T015990	lm5633.a03.11.g04460_p1	LOC_Os07g47330.1,LOC_Os01g21120.1,LOC_Os03g22170.1,LOC_Os07g12510.1,LOC_Os03g08500.1	Glyma.17G024300.1,Glyma.07G250100.1,Glyma.15G095600.1,Glyma.13G216900.1,Glyma.01G025400.1,Glyma.18G144700.1	Zm00001e026192_T001,Zm00001e035811_T001,Zm00001e010933_T001,Zm00001e017516_T001,Zm00001e028920_T001	Zosma03g15580,Zosma05g20760,Zosma05g30060,Zosma05g25520	GO:0010102, GO:0010073, GO:0048507	lateral root morphogenesis, meristem maintenance, meristem development
OG0000337	Wa8730a001g003020	AT5G18570.1	Ms09t255570.1	CKAN_00500200	COCNU_HT001RO01_04T009320	lm5633.a03.4.g08130_p1	LOC_Os07g47300.1	Glyma.15G095700.1,Glyma.13G216800.2	Zm00001e010930_T003	Zosma01g37430	GO:0042254, GO:0006364, GO:0009793	ribosome biogenesis, rRNA processing, embryo development ending in seed dormancy
OG0000338	Wa8730a001g003030	AT3G62920.1	.	CKAN_02398100	.	lm5633.a03.4.g08120_p1	LOC_Os05g30810.1	Glyma.03G210600.1,Glyma.19G207800.1	.	Zosma01g13580	-	0
OG0000339	Wa8730a001g003040	AT5G18580.1	.	CKAN_02340800	.	lm5633.a03.4.g08110_p1	LOC_Os05g05710.1	Glyma.17G024200.1,Glyma.07G250200.1	Zm00001e027504_T001	Zosma04g20580	GO:0009524, GO:0000226, GO:0030865	phragmoplast, microtubule cytoskeleton organization, cortical cytoskeleton organization
OG0000340	Wa8730a001g003050	AT5G18580.1,AT1G54450.1	.	CKAN_02340800	COCNU_HT001RO01_12T001950	lm5633.a03.4.g08110_p1	LOC_Os05g05710.1	Glyma.17G024200.1,Glyma.07G250200.1	Zm00001e027504_T002	Zosma04g20580	GO:0000278, GO:0000226, GO:0005819	mitotic cell cycle, microtubule cytoskeleton organization, spindle
OG0000341	Wa8730a001g003060	AT5G18640.1	Ms08t238990.1,Ms11t308730.1,Ms01t004620.1,Ms01t018270.1,Ms11t316590.1,Ms11t314950.1,Ms04t098490.1	CKAN_02340200	COCNU_HT001RO01_16T003000,COCNU_HT001RO01_04T009230	lm5633.a03.4.g08190_p1	LOC_Os05g30900.1,LOC_Os01g71010.1,LOC_Os07g47250.1,LOC_Os03g22670.1,LOC_Os11g43510.1	Glyma.15G097100.4,Glyma.13G215800.1	Zm00001e031404_T001,Zm00001e035806_T002,Zm00001e001654_T004,Zm00001e021076_T001,Zm00001e018708_T004	Zosma02g20220,Zosma03g20440,Zosma01g13590	GO:0008970, -, GO:0047714	phospholipase A1 activity, 0, galactolipase activity
OG0000342	Wa8730a001g003070	AT3G07070.1,AT5G18610.2,AT3G20530.1	Ms05t141750.1,Ms03t054380.1,Ms09t255590.1,Ms11t321930.1,Ms08t228130.1,Ms03t069730.1,Ms10t281980.1,Ms06t162490.1,Ms06t157910.1,Ms10t271110.1,Ms10t288540.1,Ms04t096870.1	CKAN_02465900,CKAN_02335100,CKAN_00501000,CKAN_02398800,CKAN_01394000,CKAN_02291900,CKAN_02421200,CKAN_01591900,CKAN_00983900	COCNU_HT001RO01_16T002990,COCNU_HT001RO01_04T009220,COCNU_HT001RO01_01T002240,COCNU_HT001RO01_12T003440	lm5633.a03.4.g08180_p1	LOC_Os05g30870.1,LOC_Os01g71000.1,LOC_Os03g18630.1,LOC_Os07g49470.1,LOC_Os01g15470.1,LOC_Os03g08550.1	Glyma.15G096800.1,Glyma.13G216100.1,Glyma.03G253800.1,Glyma.11G147944.1	Zm00001e028360_T003,Zm00001e027210_T003,Zm00001e035807_T001,Zm00001e017268_T003,Zm00001e018710_T001,Zm00001e029486_T001	Zosma02g18710,Zosma01g37070,Zosma01g27110,Zosma02g25480,Zosma02g03700,Zosma06g21730,Zosma01g32550,Zosma01g20400,Zosma01g39130,Zosma03g20500,Zosma03g13875,Zosma05g29700,Zosma06g25030,Zosma05g26090	GO:0000187, GO:0071323, GO:0002758	activation of MAPK activity, cellular response to chitin, innate immune response-activating signal transduction
OG0000343	Wa8730a001g003080	AT3G05420.1,AT5G18590.1,AT5G27630.1	Ms05t143600.1,Ms11t321710.1,Ms02t026800.1,Ms03t070380.1,Ms06t162170.1	CKAN_02340700,CKAN_00498200,CKAN_01391800	COCNU_HT001RO01_01T002270,COCNU_HT001RO01_12T002040	lm5633.a03.4.g08150_p1	LOC_Os11g43590.4,LOC_Os12g35350.1	Glyma.17G024000.1,Glyma.07G250400.2,Glyma.20G235500.1,Glyma.13G216400.4	Zm00001e039710_T003,Zm00001e021071_T002	Zosma06g21520,Zosma01g38860,Zosma01g13590,Zosma01g18110	GO:0010876, GO:0000062, GO:0006869	lipid localization, fatty-acyl-CoA binding, lipid transport
OG0000344	Wa8730a001g003090	.	.	.	.	.	.	.	.	.
OG0000346	Wa8730a001g003100	AT3G06390.1,AT4G03180.1	Ms08t212750.1,Ms09t269600.1,Ms03t070350.1,Ms05t116840.1	CKAN_02466800,CKAN_00501700	COCNU_HT001RO01_01T002170	lm5633.a03.4.g08260_p1	LOC_Os12g35270.1	Glyma.17G023000.1,Glyma.07G251300.1,Glyma.03G209500.1,Glyma.19G206900.1	Zm00001e039718_T001,Zm00001e018287_T001	Zosma04g20570	GO:0005802, GO:0051536, GO:0048037	trans-Golgi network, iron-sulfur cluster binding, obsolete cofactor binding
OG0000347	Wa8730a001g003110	AT3G05240.1,AT1G03560.1,AT3G62890.1,AT2G13600.1,AT3G20730.1,AT3G14330.1	Ms05t144100.1,Ms03t053880.1,Ms08t212580.1,Ms09t269590.1,Ms11t322240.1,Ms02t026070.1,Ms10t282380.1,Ms06t158680.1,Ms07t182220.1,Ms05t116840.1,Ms03t064060.1,Ms04t099950.1,Ms05t127130.1	CKAN_02468900,CKAN_02342500,CKAN_00513200,CKAN_02399700,CKAN_01404200,CKAN_02290200,CKAN_01746800,CKAN_01587600,CKAN_00987900	COCNU_HT001RO01_16T003480,COCNU_HT001RO01_04T008820,COCNU_HT001RO01_01T002130,COCNU_HT001RO01_12T003730,COCNU_HT001RO01_02T016350	lm5633.a03.4.g08270_p1,lm5633.a03.11.g04780_p1	LOC_Os05g30710.1,LOC_Os01g71180.1,LOC_Os05g05490.1,LOC_Os07g47370.1,LOC_Os01g25530.1,LOC_Os11g43934.1,LOC_Os12g36620.1,LOC_Os03g08680.1	Glyma.17G024900.1,Glyma.03G238000.1,Glyma.07G245500.1,Glyma.18G134700.1	Zm00001e028355_T001,Zm00001e031351_T001,Zm00001e010937_T001,Zm00001e025544_T001,Zm00001e007462_T001	Zosma02g18560,Zosma02g22310,Zosma05g06890,Zosma02g04090,Zosma04g20260,Zosma04g25260,Zosma03g18530,Zosma06g16590,Zosma03g14640,Zosma05g33480,Zosma05g30350,Zosma01g14000	GO:0003723, GO:0090305, GO:0004519	RNA binding, nucleic acid phosphodiester bond hydrolysis, endonuclease activity
OG0000348	Wa8730a001g003120	AT3G05100.1	Ms04t099400.1,Ms05t127140.1	CKAN_02399800	COCNU_HT001RO01_16T001000	lm5633.a03.4.g07760_p1	LOC_Os07g47150.2	.	Zm00001e010926_T001	.	-	0
OG0000349	Wa8730a001g003130	AT3G05040.1	Ms01t018230.1	CKAN_02467000	COCNU_HT001RO01_01T002420	lm5633.a03.4.g08360_p1	LOC_Os01g26160.1	Glyma.19G240700.1,Glyma.03G243400.1	Zm00001e026304_T001	Zosma03g14740	GO:0009944, GO:0046825, GO:0009910	polarity specification of adaxial/abaxial axis, regulation of protein export from nucleus, negative regulation of flower development
OG0000350	Wa8730a001g003140	AT5G18670.1	Ms03t054320.1,Ms05t124050.1	CKAN_02289300	COCNU_HT001RO01_16T003110	lm5633.a03.4.g08370_p1,lm5633.a03.11.g04710_p1	LOC_Os07g47120.1,LOC_Os03g22790.1	Glyma.15G098100.1,Glyma.13G215000.1	Zm00001e035797_T003,Zm00001e001671_T001,Zm00001e038205_T001,Zm00001e035179_T001	Zosma01g20150,Zosma03g14750,Zosma05g26530	GO:0048831, -, GO:0016161	regulation of shoot system development, 0, beta-amylase activity
OG0000351	Wa8730a001g003150	AT3G06380.1,AT5G18680.1,AT2G47900.3,AT1G47270.2	Ms11t308500.1,Ms01t004640.1,Ms10t288730.1,Ms03t064320.1	CKAN_02467100,CKAN_00502000,CKAN_02289200	COCNU_HT001RO01_04T009090,COCNU_HT001RO01_12T001830	lm5633.a03.4.g08380_p1,lm5633.a03.15.g05730_p1	LOC_Os07g47110.1,LOC_Os03g22800.1,LOC_Os12g35060.1	Glyma.17G022700.3,Glyma.07G251800.3,Glyma.02G152700.1,Glyma.15G098200.1,Glyma.13G214900.1	Zm00001e001672_T001,Zm00001e039720_T001,Zm00001e007472_T001	Zosma04g20550,Zosma01g20180,Zosma06g25410	GO:0043168, GO:0009620, GO:0035091	anion binding, response to fungus, phosphatidylinositol binding
OG0000352	Wa8730a001g003160	AT3G06380.1,AT5G18680.1,AT2G47900.3,AT1G47270.1	Ms11t308500.1,Ms01t004640.1,Ms10t288730.1,Ms03t064320.1	CKAN_02467100,CKAN_00502000,CKAN_02289200	COCNU_HT001RO01_04T009090	lm5633.a03.4.g08380_p1,lm5633.a03.15.g05730_p1	LOC_Os07g47110.1,LOC_Os03g22800.1	Glyma.17G022700.3,Glyma.07G251800.3,Glyma.02G152700.1,Glyma.15G098200.1,Glyma.13G214900.1	Zm00001e001672_T001,Zm00001e007472_T001	Zosma04g20550,Zosma06g25410	GO:0043168, GO:0009620, GO:0035091	anion binding, response to fungus, phosphatidylinositol binding
OG0000353	Wa8730a001g003170	AT1G08820.2,AT1G51270.3,AT5G54110.1	Ms03t054300.1,Ms08t228180.1,Ms08t238500.1,Ms03t069570.1,Ms10t271090.1	CKAN_02400200	COCNU_HT001RO01_16T003120,COCNU_HT001RO01_04T009070,COCNU_HT001RO01_12T003980	lm5633.a03.4.g08390_p1	LOC_Os05g30950.1,LOC_Os01g71050.1	Glyma.17G022400.1,Glyma.07G252000.1,Glyma.10G158400.1,Glyma.20G230200.2,Glyma.15G098400.1	Zm00001e028359_T004,Zm00001e027215_T001,Zm00001e018705_T001	Zosma03g20350,Zosma05g33790	GO:0042175, GO:0098827, GO:0044432	nuclear outer membrane-endoplasmic reticulum membrane network, endoplasmic reticulum subcompartment, obsolete endoplasmic reticulum part
OG0000354	Wa8730a001g003180	AT3G05020.1,AT5G27200.1,AT1G54580.1	Ms09t255350.1,Ms09t269580.1,Ms08t228240.1,Ms08t238980.1,Ms06t162140.1	CKAN_02337700,CKAN_00502300,CKAN_02400300	COCNU_HT001RO01_16T003130,COCNU_HT001RO01_01T002480	lm5633.a03.4.g08400_p1	LOC_Os05g31290.1,LOC_Os12g34890.1	Glyma.19G240100.1,Glyma.03G242600.3,Glyma.10G158500.1,Glyma.15G098500.2,Glyma.13G214600.1	Zm00001e035982_T002,Zm00001e039724_T001,Zm00001e018291_T002	Zosma04g20540,Zosma01g13720	GO:0000036, GO:0000035, GO:0043168	acyl carrier activity, acyl binding, anion binding
OG0000356	Wa8730a001g003190	AT5G18700.1	Ms06t161860.1,Ms06t158200.1,Ms01t004650.1	CKAN_02400400,CKAN_01580400	COCNU_HT001RO01_16T002920	lm5633.a03.4.g08430_p1,lm5633.a03.11.g02520_p1	LOC_Os01g15480.1,LOC_Os03g28300.1	Glyma.15G098800.2,Glyma.13G214400.1	Zm00001e027190_T001,Zm00001e017270_T001,Zm00001e021095_T001,Zm00001e025562_T003	Zosma02g18710,Zosma06g21350,Zosma01g32370,Zosma01g20210,Zosma01g39010,Zosma05g26090	GO:0010975, GO:2001222, GO:0005819	regulation of neuron projection development, regulation of neuron migration, spindle
OG0000357	Wa8730a001g003200	AT4G03150.1	Ms02t026850.1	CKAN_00503000	COCNU_HT001RO01_12T001770	lm5633.a03.4.g08460_p1	LOC_Os12g34880.1	Glyma.19G206000.1	.	.	-	0
OG0000358	Wa8730a001g003210	AT3G06350.1	Ms06t162130.1,Ms04t094450.1,Ms07t182560.1	CKAN_02400700,CKAN_02289500	COCNU_HT001RO01_01T002540	lm5633.a03.4.g08530_p1	LOC_Os01g27750.1,LOC_Os12g34874.1	Glyma.19G239800.1,Glyma.03G242400.1,Glyma.20G230300.1	Zm00001e039727_T001,Zm00001e017662_T001,Zm00001e018290_T001	Zosma05g26210	GO:0019632, GO:0004764, GO:0009423	shikimate metabolic process, shikimate 3-dehydrogenase (NADP+) activity, chorismate biosynthetic process
OG0000359	Wa8730a001g003220	AT1G03457.1,AT4G03110.1	Ms05t137260.1,Ms03t054280.1,Ms09t255420.1,Ms05t124070.1	CKAN_02401500,CKAN_02290100	COCNU_HT001RO01_16T002830,COCNU_HT001RO01_04T008770,COCNU_HT001RO01_02T017210	lm5633.a03.4.g08470_p1	LOC_Os05g30980.1,LOC_Os01g71200.1	Glyma.10G022200.6,Glyma.03G208500.1,Glyma.19G205700.1,Glyma.02G152000.1	Zm00001e026764_T001,Zm00001e028353_T002,Zm00001e031386_T001	Zosma01g27260,Zosma02g01880,Zosma03g31440,Zosma03g20380	GO:0009626, GO:2000028, GO:0080151	plant-type hypersensitive response, regulation of photoperiodism, flowering, positive regulation of salicylic acid mediated signaling pathway
OG0000360	Wa8730a001g003230	AT4G03100.1,AT1G08340.1	Ms05t137340.1,Ms02t026890.1,Ms11t308150.1	CKAN_01406400,CKAN_02290300	COCNU_HT001RO01_01T002640,COCNU_HT001RO01_01T017200	lm5633.a03.4.g08520_p1	LOC_Os11g05540.1,LOC_Os12g34840.1,LOC_Os01g73630.1	Glyma.10G022400.1,Glyma.03G208300.1,Glyma.19G205467.1,Glyma.02G151800.1,Glyma.03G259800.1,Glyma.19G258900.1	Zm00001e018302_T003	Zosma01g27270,Zosma05g06800,Zosma02g02010	GO:0005886, GO:0034059, GO:0009531	plasma membrane, response to anoxia, secondary cell wall
OG0000361	Wa8730a001g003240	AT1G23330.1	Ms09t255670.1,Ms05t123900.1	CKAN_00504500,CKAN_02401700,CKAN_02290900	COCNU_HT001RO01_16T000940,COCNU_HT001RO01_01T002690,COCNU_HT001RO01_01T017070	lm5633.a03.4.g08680_p1	LOC_Os05g33820.1	Glyma.01G027500.6	Zm00001e031649_T001	Zosma01g20350	-	0
OG0000362	Wa8730a001g003250	AT4G03090.5	Ms03t070290.1	.	COCNU_HT001RO01_01T002680,COCNU_HT001RO01_12T001660,COCNU_HT001RO01_01T016910	lm5633.a03.4.g08670_p1	.	.	Zm00001e021086_T003	Zosma04g20520,Zosma01g13830	GO:0005730, GO:0003697, GO:0060195	nucleolus, single-stranded DNA binding, negative regulation of antisense RNA transcription
OG0000363	Wa8730a001g003260	AT3G06310.3,AT5G18800.2	Ms06t163090.1,Ms07t197870.1,Ms03t064830.1	CKAN_02290700	.	lm5633.a03.4.g08670_p1	LOC_Os03g18420.1	.	Zm00001e001336_T001,Zm00001e038403_T001	Zosma01g20340	GO:0044455, GO:0005747, GO:0005746	obsolete mitochondrial membrane part, mitochondrial respiratory chain complex I, mitochondrial respirasome
OG0000364	Wa8730a001g003270	AT1G03180.1	Ms09t269550.1	CKAN_00512000	COCNU_HT001RO01_12T001670	.	.	Glyma.03G153000.1	Zm00001e017680_T001	Zosma03g20220	GO:0016740, -, GO:0016757	transferase activity, 0, transferase activity, transferring glycosyl groups
OG0000365	Wa8730a001g003280	AT1G03190.1	Ms11t313710.1	.	COCNU_HT001RO01_01T002680	lm5633.a03.4.g08620_p1	LOC_Os05g05260.1	.	Zm00001e031341_T004	Zosma05g06770,Zosma01g20330	GO:0006281, GO:0009411, GO:0009408	DNA repair, response to UV, response to heat
OG0000366	Wa8730a001g003290	AT2G26430.1	Ms05t143560.1,Ms08t212820.1,Ms11t313460.1	CKAN_00513300,CKAN_02290500	COCNU_HT001RO01_01T002670	lm5633.a03.4.g08600_p1	LOC_Os01g27940.1	Glyma.10G158100.1,Glyma.20G230500.1	.	Zosma05g29930	GO:0045737, GO:1901409, GO:0000307	positive regulation of cyclin-dependent protein serine/threonine kinase activity, positive regulation of phosphorylation of RNA polymerase II C-terminal domain, cyclin-dependent protein kinase holoenzyme complex
OG0000367	Wa8730a001g003300	AT2G47970.1,AT3G63000.1	Ms02t026910.1,Ms11t310650.1	CKAN_02467800	COCNU_HT001RO01_01T002660,COCNU_HT001RO01_12T001680	lm5633.a03.4.g08580_p1	LOC_Os01g27990.1	Glyma.03G207900.1,Glyma.19G205200.1	.	Zosma03g20210	GO:0044257, GO:0043130, GO:0031625	cellular protein catabolic process, ubiquitin binding, ubiquitin protein ligase binding
OG0000368	Wa8730a001g003310	AT5G18810.1	Ms05t144080.1	CKAN_02468100,CKAN_00504900,CKAN_02401800	COCNU_HT001RO01_01T017020	lm5633.a03.11.g02620_p1	LOC_Os03g24890.1	Glyma.17G021700.10,Glyma.07G252700.1	Zm00001e001755_T001	Zosma04g20170	GO:0000244, GO:0050733, GO:0000245	spliceosomal tri-snRNP complex assembly, RS domain binding, spliceosomal complex assembly
OG0000369	Wa8730a001g003320	AT4G28420.2,AT5G53970.1	Ms03t070270.1	.	COCNU_HT001RO01_01T002730,COCNU_HT001RO01_12T001590,COCNU_HT001RO01_05T007940	lm5633.a03.4.g08700_p1	LOC_Os11g42510.1	Glyma.06G235500.10,Glyma.12G161500.1	Zm00001e021089_T003	Zosma01g32610	GO:0010189, GO:0004838, GO:0006572	vitamin E biosynthetic process, L-tyrosine:2-oxoglutarate aminotransferase activity, tyrosine catabolic process
OG0000370	Wa8730a001g003330	AT1G08880.1,AT5G27670.1,AT1G51060.1,AT1G54690.1,AT3G20670.1,AT5G54640.1,AT4G27230.1	Ms08t212840.1,Ms08t227980.1,Ms02t026970.1,Ms03t070280.1,Ms10t271950.1,Ms10t289020.1,Ms03t064620.1,Ms04t107270.1	CKAN_02468200,CKAN_00505000,CKAN_02291000,CKAN_01581900	COCNU_HT001RO01_01T002720,COCNU_HT001RO01_12T001620,COCNU_HT001RO01_02T016030	lm5633.a03.4.g08690_p1,lm5633.a03.15.g05870_p1	LOC_Os12g34510.1	Glyma.03G148100.1,Glyma.19G239200.1,Glyma.03G241800.1,Glyma.19G151400.1,Glyma.01G022100.1	Zm00001e039735_T001,Zm00001e035183_T003	Zosma03g31720,Zosma01g13860	GO:0044427, GO:0006342, GO:0051276	obsolete chromosomal part, chromatin silencing, chromosome organization
OG0000371	Wa8730a001g003340	AT3G05120.1,AT5G18830.1,AT3G63010.1,AT5G27320.1	Ms05t144070.1,Ms03t054620.1,Ms08t211930.1,Ms09t255640.1,Ms02t026280.1,Ms03t071320.1,Ms10t281340.1,Ms06t158430.1	CKAN_02468300,CKAN_00505500,CKAN_02291200	COCNU_HT001RO01_01T016990	lm5633.a03.4.g08820_p1	LOC_Os05g33730.1	Glyma.10G022900.1,Glyma.03G148300.1,Glyma.10G158000.1,Glyma.19G202900.1,Glyma.02G151100.1,Glyma.20G230600.2,Glyma.15G099400.1,Glyma.13G213400.1	Zm00001e031646_T001	Zosma01g33760,Zosma03g20240,Zosma06g16600	GO:0048437, GO:0010325, GO:0048444	floral organ development, raffinose family oligosaccharide biosynthetic process, floral organ morphogenesis
OG0000372	Wa8730a001g003350	AT3G16890.1,AT2G48000.1	Ms08t211940.1,Ms03t071310.1	CKAN_01403500,CKAN_02291300	COCNU_HT001RO01_04T008890,COCNU_HT001RO01_02T017320	lm5633.a03.4.g08830_p1,lm5633.a03.15.g05030_p1	LOC_Os05g33760.1	Glyma.03G148400.4,Glyma.19G151700.2	Zm00001e031648_T001,Zm00001e001585_T001	Zosma03g20250	GO:0004519, GO:0003723, GO:0090305	endonuclease activity, RNA binding, nucleic acid phosphodiester bond hydrolysis
OG0000373	Wa8730a001g003360	AT3G06810.1	.	CKAN_02348300	COCNU_HT001RO01_04T010320	lm5633.a03.4.g07280_p1	LOC_Os07g47820.1	Glyma.15G150900.1,Glyma.09G042000.1	Zm00001e010961_T001	Zosma02g22460	GO:0050662, GO:0033539, GO:0050660	obsolete coenzyme binding, fatty acid beta-oxidation using acyl-CoA dehydrogenase, flavin adenine dinucleotide binding
OG0000374	Wa8730a001g003370	AT4G02280.1,AT5G49190.1	Ms03t053720.1,Ms08t228620.1	CKAN_02348200,CKAN_00801600	COCNU_HT001RO01_16T003740,COCNU_HT001RO01_04T010330,COCNU_HT001RO01_05T008090	lm5633.a03.4.g07260_p1	LOC_Os03g22120.1,LOC_Os03g28330.1	Glyma.03G216300.1,Glyma.15G151000.1,Glyma.19G212800.1	Zm00001e001601_T001	Zosma02g20080,Zosma06g21630,Zosma06g17360	GO:0048316, GO:0010555, GO:0016157	seed development, response to mannitol, sucrose synthase activity
OG0000375	Wa8730a001g003380	AT4G02280.1,AT5G49190.1	Ms03t053720.1,Ms08t228620.1	CKAN_02348200,CKAN_00801600	COCNU_HT001RO01_16T003740,COCNU_HT001RO01_04T010330,COCNU_HT001RO01_05T008090	lm5633.a03.4.g07260_p1	LOC_Os03g22120.1,LOC_Os03g28330.5	Glyma.03G216300.1,Glyma.15G151000.1,Glyma.19G212800.1	Zm00001e001606_T001	Zosma02g20080,Zosma06g21630,Zosma03g18650,Zosma06g17360	GO:0048316, GO:0010555, GO:0016157	seed development, response to mannitol, sucrose synthase activity
OG0000376	Wa8730a001g003390	AT3G16760.1	Ms09t254860.1,Ms08t228640.1	CKAN_02348000	COCNU_HT001RO01_16T003710,COCNU_HT001RO01_04T010370	lm5633.a03.4.g07250_p1	LOC_Os05g31062.1,LOC_Os03g22140.1	Glyma.17G028900.1,Glyma.07G244900.3	Zm00001e001609_T001	Zosma01g37410,Zosma01g28030	GO:0070286, GO:0060271, GO:0035082	axonemal dynein complex assembly, cilium assembly, axoneme assembly
OG0000377	Wa8730a001g003400	AT3G16770.1,AT2G47520.1,AT1G50640.1,AT1G12980.1,AT3G20310.1,AT3G14230.2	Ms03t053700.1,Ms09t256590.1,Ms11t321740.1,Ms02t023650.1,Ms11t303740.1,Ms08t229800.1,Ms11t312640.1,Ms04t098550.1,Ms05t127580.1	CKAN_02347600,CKAN_02392800,CKAN_00832400,CKAN_01915500	COCNU_HT001RO01_16T003670,COCNU_HT001RO01_01T002050,COCNU_HT001RO01_12T002610,COCNU_HT001RO01_05T008080	lm5633.a03.4.g07230_p1,lm5633.a03.11.g04050_p1	LOC_Os07g47790.2,LOC_Os01g21120.1,LOC_Os03g22170.1,LOC_Os03g08460.1	Glyma.10G016500.1,Glyma.02G016100.1,Glyma.19G213100.1,Glyma.03G263700.1,Glyma.19G262700.1	Zm00001e026192_T001,Zm00001e035837_T001,Zm00001e017516_T001,Zm00001e000611_T001	Zosma02g20100,Zosma01g28060,Zosma05g05660,Zosma06g21590,Zosma04g25320,Zosma03g18620,Zosma06g17350,Zosma05g20760,Zosma05g29780	GO:2000280, GO:0070483, GO:0003700	regulation of root development, detection of hypoxia, DNA-binding transcription factor activity
OG0000378	Wa8730a001g003410	AT1G56230.1	Ms06t162290.1	CKAN_02347500	COCNU_HT001RO01_01T002060	lm5633.a03.4.g07290_p1	LOC_Os01g24480.1	Glyma.10G150500.6,Glyma.20G237900.1	Zm00001e017610_T002	Zosma01g28070	-	0
OG0000379	Wa8730a001g003420	AT3G05600.1,AT4G02340.1,AT4G15960.1,AT2G26740.1	Ms03t053660.1,Ms08t216040.1,Ms08t228650.1,Ms03t070570.1	CKAN_02460600,CKAN_02347400,CKAN_00493700	COCNU_HT001RO01_16T003650,COCNU_HT001RO01_01T001620	lm5633.a03.4.g07320_p1	LOC_Os01g15130.1	Glyma.17G028200.2,Glyma.19G231700.1,Glyma.03G234300.1,Glyma.07G245800.1,Glyma.03G215400.1,Glyma.19G211900.1,Glyma.20G237500.1	Zm00001e017256_T001	Zosma01g29630,Zosma06g21620	GO:0017144, GO:0006805, GO:0046272	drug metabolic process, xenobiotic metabolic process, stilbene catabolic process
OG0000380	Wa8730a001g003430	.	.	.	.	.	.	.	.	.
OG0000381	Wa8730a001g003440	AT4G28260.1	Ms11t311210.1,Ms05t127640.1	.	.	lm5633.a03.4.g07340_p1	.	.	.	Zosma05g29830	GO:0071218, GO:0030544, GO:0051085	cellular response to misfolded protein, Hsp70 protein binding, chaperone cofactor-dependent protein refolding
OG0000382	Wa8730a001g003450	AT3G05600.1,AT4G02340.1,AT4G15960.1,AT2G26740.1	Ms03t053660.1,Ms08t216040.1,Ms08t228650.1,Ms03t070570.1	CKAN_02460600,CKAN_02347400,CKAN_00493700	COCNU_HT001RO01_16T003650,COCNU_HT001RO01_01T001620	lm5633.a03.4.g07320_p1	LOC_Os01g15120.1	Glyma.17G028200.2,Glyma.19G231700.1,Glyma.03G234300.1,Glyma.07G245800.1,Glyma.03G215400.1,Glyma.19G211900.1,Glyma.20G237500.1	Zm00001e017256_T001	Zosma01g29630,Zosma06g21620	GO:0017144, GO:0006805, GO:0005777	drug metabolic process, xenobiotic metabolic process, peroxisome
OG0000383	Wa8730a001g003460	AT1G09150.1	Ms08t216020.1,Ms11t303760.1	CKAN_02347100	COCNU_HT001RO01_16T003630	.	LOC_Os01g21180.1	.	Zm00001e026170_T002	Zosma01g28080	GO:0002181, GO:0001731, GO:0032790	cytoplasmic translation, formation of translation preinitiation complex, ribosome disassembly
OG0000384	Wa8730a001g003470	AT3G06860.1,AT4G29010.1	Ms02t026190.1,Ms03t070530.1	CKAN_02460900,CKAN_02347000,CKAN_00494200	COCNU_HT001RO01_12T002570	lm5633.a03.4.g07350_p1	LOC_Os05g29880.3,LOC_Os05g06300.1,LOC_Os01g24680.1	Glyma.17G027700.1,Glyma.07G246300.1	Zm00001e026247_T001,Zm00001e031435_T004,Zm00001e028922_T001	Zosma02g23070,Zosma06g21610	GO:0016508, GO:0008692, GO:0018812	long-chain-enoyl-CoA hydratase activity, 3-hydroxybutyryl-CoA epimerase activity, 3-hydroxyacyl-CoA dehydratase activity
OG0000385	Wa8730a001g003480	AT5G27830.1	Ms11t310780.1	CKAN_02393900	COCNU_HT001RO01_01T001670	.	.	Glyma.10G150900.1,Glyma.20G237300.2	.	Zosma01g28130	-	0
OG0000386	Wa8730a001g003490	AT2G47580.1	Ms03t055270.1,Ms02t026690.1,Ms10t271670.1	CKAN_00993400	COCNU_HT001RO01_01T001680,COCNU_HT001RO01_12T002550	lm5633.a03.4.g07360_p1	LOC_Os05g06280.1,LOC_Os03g18720.2	Glyma.03G253300.1,Glyma.19G250800.1	Zm00001e001359_T001,Zm00001e038386_T002,Zm00001e031154_T001	Zosma01g28140,Zosma01g17690	GO:0005730, GO:0044428, GO:0030619	nucleolus, obsolete nuclear part, U1 snRNA binding
OG0000387	Wa8730a001g003500	AT1G02910.1	Ms02t026760.1	.	COCNU_HT001RO01_12T002210	lm5633.a03.4.g07830_p1	LOC_Os01g25600.1	Glyma.03G212900.1,Glyma.19G209800.1	Zm00001e017629_T003	Zosma03g18500	GO:0015979, GO:0019684, GO:0010270	photosynthesis, photosynthesis, light reaction, photosystem II oxygen evolving complex assembly
OG0000388	Wa8730a001g003510	AT2G47760.5	.	CKAN_02344300	.	lm5633.a03.4.g07820_p1	.	Glyma.03G213200.1,Glyma.19G210000.1	.	Zosma01g33560	GO:0009101, GO:0097502, GO:0000033	glycoprotein biosynthetic process, mannosylation, alpha-1,3-mannosyltransferase activity
OG0000389	Wa8730a001g003520	.	.	.	.	.	.	.	.	.
OG0000390	Wa8730a001g003530	.	.	.	.	.	.	.	.	.
OG0000391	Wa8730a001g003540	AT3G06930.1,AT5G49020.1	Ms03t054710.1,Ms11t316880.1,Ms11t312670.1	CKAN_02463300,CKAN_00499100,CKAN_00833400	COCNU_HT001RO01_04T010050,COCNU_HT001RO01_01T001890,COCNU_HT001RO01_01T016720	lm5633.a03.4.g07810_p1	LOC_Os07g47500.1	Glyma.17G026500.1,Glyma.07G247300.1,Glyma.15G148200.1,Glyma.09G044700.1	Zm00001e035826_T006,Zm00001e010943_T003	Zosma06g21830,Zosma05g20650	GO:0008469, GO:0010228, GO:0061458	histone-arginine N-methyltransferase activity, vegetative to reproductive phase transition of meristem, reproductive system development
OG0000392	Wa8730a001g003550	AT1G56090.1	Ms10t296140.1	CKAN_02348000,CKAN_01085000	.	lm5633.a03.4.g07780_p1	.	.	.	Zosma05g33160	GO:0005789, GO:0046967, GO:0009707	endoplasmic reticulum membrane, cytosol to endoplasmic reticulum transport, chloroplast outer membrane
OG0000393	Wa8730a001g003560	AT4G15780.1,AT2G33120.1	Ms09t269620.1	CKAN_02342700,CKAN_00984200	COCNU_HT001RO01_12T002110	.	.	Glyma.17G025800.1,Glyma.07G248300.1,Glyma.15G147200.1,Glyma.09G045400.1	.	Zosma02g22360,Zosma04g26020	GO:0031201, GO:0006887, GO:0006906	SNARE complex, exocytosis, vesicle fusion
OG0000394	Wa8730a001g003570	AT3G06920.1,AT3G16710.1,AT1G09190.1,AT2G32630.1,AT1G71210.1,AT3G20730.1	Ms03t053510.1,Ms08t215650.1,Ms08t227910.1,Ms02t026240.1,Ms11t308760.1,Ms05t121330.1,Ms01t018310.1,Ms07t182430.1,Ms11t313790.1,Ms10t295670.1	CKAN_02448300,CKAN_02396100,CKAN_01405800,CKAN_00831300	COCNU_HT001RO01_04T010090,COCNU_HT001RO01_01T002300,COCNU_HT001RO01_12T002340,COCNU_HT001RO01_02T016350,COCNU_HT001RO01_13T002890	lm5633.a03.4.g07890_p1,lm5633.a03.15.g05030_p1	LOC_Os05g30240.1,LOC_Os07g47470.1,LOC_Os01g27650.1,LOC_Os03g21780.1,LOC_Os03g27880.1,LOC_Os11g43934.1	.	Zm00001e031396_T001,Zm00001e010937_T003	Zosma02g22380,Zosma01g28670,Zosma06g21500,Zosma04g19820,Zosma01g33020,Zosma03g19270,Zosma06g17110,Zosma05g20690	GO:0004519, GO:0090305, GO:0003723	endonuclease activity, nucleic acid phosphodiester bond hydrolysis, RNA binding
OG0000395	Wa8730a001g003580	AT2G47800.1,AT3G62700.1,AT1G71330.1	Ms02t026740.1,Ms07t182330.1,Ms01t016290.1	CKAN_02462600,CKAN_00496200	COCNU_HT001RO01_01T001860,COCNU_HT001RO01_12T002360,COCNU_HT001RO01_05T008180	lm5633.a03.4.g07680_p1	LOC_Os01g25386.1	Glyma.10G019000.1,Glyma.15G148500.1,Glyma.09G044500.1,Glyma.19G210700.1	Zm00001e026288_T001	Zosma01g28290	GO:0010118, GO:0016887, GO:0000325	stomatal movement, ATPase activity, plant-type vacuole
OG0000396	Wa8730a001g003590	AT1G02870.1	Ms03t053620.1	CKAN_00496100	COCNU_HT001RO01_04T009900	lm5633.a03.4.g07620_p1	LOC_Os05g30420.1	Glyma.10G018900.1,Glyma.02G155400.1	Zm00001e031413_T001	Zosma01g33430	-	0
OG0000397	Wa8730a001g003600	AT3G16630.1,AT4G15885.1	Ms02t026140.1,Ms11t310740.1,Ms03t069660.1,Ms11t316560.1	CKAN_02462400,CKAN_00496000	COCNU_HT001RO01_16T004100,COCNU_HT001RO01_04T009890,COCNU_HT001RO01_01T001840,COCNU_HT001RO01_12T002370	lm5633.a03.4.g07610_p1,lm5633.a03.15.g05990_p1,lm5633.a03.11.g03990_p1	LOC_Os05g06280.2	Glyma.17G027200.1,Glyma.19G230100.1,Glyma.03G233100.1,Glyma.07G246800.1,Glyma.15G148800.4,Glyma.09G044300.1	Zm00001e026282_T001,Zm00001e026744_T001,Zm00001e031148_T001	Zosma01g27880,Zosma02g02000,Zosma06g23030,Zosma01g20150,Zosma04g25380	GO:0044431, GO:0005795, GO:0090626	obsolete Golgi apparatus part, Golgi stack, plant epidermis morphogenesis
OG0000398	Wa8730a001g003610	AT2G47710.1	Ms08t212610.1,Ms06t162250.1,Ms05t116610.1,Ms01t016500.1	CKAN_02462200,CKAN_00495900,CKAN_01607400	COCNU_HT001RO01_16T003520,COCNU_HT001RO01_12T002380	lm5633.a03.4.g07600_p1,lm5633.a03.15.g05250_p1	LOC_Os07g47620.1,LOC_Os03g22390.1,LOC_Os12g36640.2	Glyma.10G018700.2,Glyma.19G228700.1,Glyma.03G231700.1,Glyma.10G147700.1,Glyma.03G214150.1,Glyma.19G211000.1,Glyma.02G155600.5	Zm00001e026208_T001,Zm00001e039685_T001,Zm00001e018234_T001	Zosma02g22340,Zosma02g03010,Zosma06g22080	-, GO:0016208, GO:0008144	0, AMP binding, drug binding
OG0000399	Wa8730a001g003620	AT3G05540.1,AT3G16640.1	Ms11t310750.1,Ms04t094480.1,Ms07t182640.1	CKAN_02462100,CKAN_00495800	COCNU_HT001RO01_16T003530,COCNU_HT001RO01_01T001820,COCNU_HT001RO01_12T002390	lm5633.a03.4.g07590_p1,lm5633.a03.15.g05240_p1	LOC_Os11g43900.1	Glyma.10G151800.1,Glyma.15G148900.1,Glyma.09G044200.1	.	.	GO:0042127, GO:0008017, GO:0005509	regulation of cell population proliferation, microtubule binding, calcium ion binding
OG0000400	Wa8730a001g003630	.	Ms03t054460.1,Ms03t070850.1,Ms05t123970.1,Ms10t271770.1,Ms04t094900.1,Ms11t313690.1	CKAN_00791700	COCNU_HT001RO01_01T000810,COCNU_HT001RO01_12T003260,COCNU_HT001RO01_08T000650	lm5633.a03.4.g07580_p1	LOC_Os05g06660.1	.	Zm00001e026244_T001,Zm00001e010893_T001	.	GO:0044257, GO:0004185, GO:0051603	cellular protein catabolic process, serine-type carboxypeptidase activity, proteolysis involved in cellular protein catabolic process
OG0000401	Wa8730a001g003640	AT3G56540.1	Ms03t054460.1,Ms03t070850.1,Ms05t123970.1,Ms10t271770.1,Ms11t313690.1	CKAN_00791700	COCNU_HT001RO01_01T000810,COCNU_HT001RO01_12T003260,COCNU_HT001RO01_08T000650	lm5633.a03.4.g07580_p1	LOC_Os05g06660.1	.	Zm00001e026244_T001,Zm00001e010893_T002	.	GO:0044257, GO:0004185, GO:0051603	cellular protein catabolic process, serine-type carboxypeptidase activity, proteolysis involved in cellular protein catabolic process
OG0000402	Wa8730a001g003650	AT3G06880.2	Ms08t215960.1	CKAN_02345600	COCNU_HT001RO01_16T003580,COCNU_HT001RO01_04T010180	lm5633.a03.4.g07530_p1	LOC_Os05g30010.1	Glyma.15G149200.1,Glyma.09G043900.1	Zm00001e031427_T002	Zosma01g28250	-	0
OG0000403	Wa8730a001g003660	AT2G26450.1,AT3G14310.1	Ms05t138430.1,Ms11t321550.1,Ms11t316910.1,Ms11t312620.1	CKAN_02349200,CKAN_02392100	COCNU_HT001RO01_16T003750,COCNU_HT001RO01_04T010190,COCNU_HT001RO01_12T002770	lm5633.a03.15.g05140_p1	LOC_Os03g18860.1,LOC_Os07g47830.1	.	Zm00001e035838_T001	Zosma02g22490,Zosma02g05330	GO:0043086, GO:0030599, GO:0046910	negative regulation of catalytic activity, pectinesterase activity, pectinesterase inhibitor activity
OG0000404	Wa8730a001g003670	AT2G47650.1,AT3G62830.1	Ms09t254780.1,Ms08t215980.1,Ms08t228680.1,Ms02t023630.1,Ms11t303810.1,Ms06t157810.1,Ms03t064660.1,Ms01t016640.1	CKAN_02461500,CKAN_02345700,CKAN_00495000,CKAN_01606100	COCNU_HT001RO01_16T003590,COCNU_HT001RO01_04T010220,COCNU_HT001RO01_12T002470	lm5633.a03.4.g07500_p1	LOC_Os05g29990.1,LOC_Os07g47700.1,LOC_Os01g21320.1,LOC_Os03g22350.1	Glyma.17G027300.1,Glyma.10G018400.1,Glyma.02G018000.2,Glyma.07G246600.1,Glyma.03G214700.1,Glyma.19G211300.1	Zm00001e026796_T001,Zm00001e031428_T001,Zm00001e001623_T001,Zm00001e017527_T003	Zosma01g28230,Zosma01g33400,Zosma04g25360	GO:0048040, GO:0008460, GO:0000139	UDP-glucuronate decarboxylase activity, dTDP-glucose 4,6-dehydratase activity, Golgi membrane
OG0000405	Wa8730a001g003680	AT2G47640.3,AT3G62840.2	.	CKAN_02395200	.	lm5633.a03.4.g07420_p1	LOC_Os01g73604.1	.	.	Zosma02g19080,Zosma06g22130	-	0
OG0000406	Wa8730a001g003690	AT3G05560.1,AT1G02830.1,AT5G27770.1	Ms05t143690.1,Ms11t321590.1,Ms08t239110.1,Ms07t182680.1	CKAN_02461200	COCNU_HT001RO01_16T003600,COCNU_HT001RO01_01T001760,COCNU_HT001RO01_12T002480	lm5633.a03.4.g07400_p1	LOC_Os07g47710.1,LOC_Os03g22340.1	Glyma.10G018200.1,Glyma.02G017800.1,Glyma.19G232700.2,Glyma.03G235000.1,Glyma.10G151200.1,Glyma.20G237000.1	Zm00001e035835_T001,Zm00001e010958_T001,Zm00001e038221_T001	Zosma02g03060,Zosma06g22140	GO:0022625, GO:0002181, GO:0042788	cytosolic large ribosomal subunit, cytoplasmic translation, polysomal ribosome
OG0000407	Wa8730a001g003700	AT4G02405.1	Ms04t094500.1	CKAN_02461100	.	.	.	Glyma.19G211400.2	.	Zosma06g21980	-	0
OG0000408	Wa8730a001g003710	.	.	.	.	.	.	.	.	.
OG0000409	Wa8730a001g003720	AT4G02350.1,AT3G56640.1	Ms08t212570.1	CKAN_02346700,CKAN_00446800,CKAN_00838900	COCNU_HT001RO01_01T001710,COCNU_HT001RO01_12T002540,COCNU_HT001RO01_08T000840	lm5633.a03.4.g07390_p1	LOC_Os01g24950.2	Glyma.03G215200.2	Zm00001e026277_T001,Zm00001e017613_T001	Zosma02g23160,Zosma01g28170	GO:0099568, GO:0000003, GO:0009846	cytoplasmic region, reproduction, pollen germination
OG0000410	Wa8730a001g003730	AT1G02816.1,AT4G02370.1	Ms09t254740.1	CKAN_02346600,CKAN_02393500	.	lm5633.a03.4.g07370_p1	LOC_Os05g29900.1	Glyma.10G017500.1,Glyma.02G016900.1,Glyma.03G215100.1,Glyma.19G211700.1	Zm00001e026792_T001,Zm00001e031431_T001	Zosma02g22300	-	0
OG0000411	Wa8730a001g003740	.	Ms05t121120.1	CKAN_00832900	.	.	.	Glyma.06G240600.2	Zm00001e029426_T003	Zosma03g19130	GO:0006487, GO:0043541, GO:0006488	protein N-linked glycosylation, UDP-N-acetylglucosamine transferase complex, dolichol-linked oligosaccharide biosynthetic process
OG0000412	Wa8730a001g003750	.	.	.	.	.	.	.	.	.
OG0000413	Wa8730a001g003760	AT1G02890.1,AT4G02480.1	Ms08t215870.1,Ms08t239090.1,Ms06t161950.1,Ms11t303920.1,Ms11t316750.1,Ms11t312650.1	CKAN_02396700,CKAN_01600400	COCNU_HT001RO01_04T010010,COCNU_HT001RO01_01T001880,COCNU_HT001RO01_12T002290,COCNU_HT001RO01_05T006750	lm5633.a03.4.g07750_p1	LOC_Os07g47530.1,LOC_Os03g22420.1,LOC_Os11g43970.1	Glyma.10G019300.1,Glyma.02G155100.1	Zm00001e010947_T001,Zm00001e001631_T001,Zm00001e038215_T002,Zm00001e021043_T002	Zosma02g19070,Zosma02g23520,Zosma03g33320,Zosma04g25390	GO:0044459, GO:0098794, GO:0045211	obsolete plasma membrane part, postsynapse, postsynaptic membrane
OG0000414	Wa8730a001g003770	AT1G02880.2	Ms08t215880.1,Ms11t303910.1	CKAN_00497300	.	.	LOC_Os05g30454.1,LOC_Os01g70580.1,LOC_Os01g25440.1	Glyma.03G213500.1,Glyma.19G210300.1	Zm00001e031412_T001,Zm00001e017622_T001,Zm00001e018740_T001	Zosma02g22440	GO:0051188, GO:0017144, GO:0009108	obsolete cofactor biosynthetic process, drug metabolic process, obsolete coenzyme biosynthetic process
OG0000415	Wa8730a001g003780	AT1G02800.1,AT4G02290.1,AT2G32990.1,AT1G70710.1,AT1G23210.1	Ms08t228720.1,Ms05t122030.1,Ms11t303700.1,Ms06t158040.1,Ms01t003290.1	CKAN_02348700	COCNU_HT001RO01_04T010290,COCNU_HT001RO01_08T002040	lm5633.a03.4.g07220_p1	LOC_Os01g21070.1,LOC_Os02g50040.1	Glyma.10G017000.1,Glyma.02G016400.1,Glyma.03G216100.2,Glyma.19G212733.1,Glyma.04G111300.1	Zm00001e026190_T002,Zm00001e030964_T002	Zosma02g22470,Zosma02g04050,Zosma06g23320,Zosma04g18300,Zosma04g25020,Zosma03g16360	GO:0009624, GO:0007389, GO:0008810	response to nematode, pattern specification process, cellulase activity
OG0000416	Wa8730a001g003790	AT4G28556.1,AT3G23380.1,AT2G33460.1	Ms02t024160.1,Ms11t313230.1,Ms10t296260.1	CKAN_01738100,CKAN_01604600,CKAN_00981800	.	lm5633.a03.4.g07190_p1	LOC_Os06g46754.2	Glyma.02G003900.1	.	Zosma02g22610,Zosma04g26090,Zosma03g16160	GO:0045177, GO:0010215, GO:0016324	apical part of cell, cellulose microfibril organization, apical plasma membrane
OG0000417	Wa8730a001g003800	.	Ms08t212630.1,Ms10t297050.1	CKAN_02396100	COCNU_HT001RO01_01T001340,COCNU_HT001RO01_12T002340,COCNU_HT001RO01_05T008040,COCNU_HT001RO01_13T002890	lm5633.a03.4.g07180_p1	LOC_Os07g47720.1	.	Zm00001e010941_T001,Zm00001e001754_T001	Zosma03g19270,Zosma06g17110	GO:0004519, GO:0009451, GO:0090305	endonuclease activity, RNA modification, nucleic acid phosphodiester bond hydrolysis
OG0000418	Wa8730a001g003810	AT3G16770.1,AT2G47520.1,AT3G23220.1,AT2G40220.1,AT1G71450.1,AT1G13260.1,AT3G20310.1,AT3G14230.3,AT1G46768.2	Ms03t053710.1,Ms09t256590.1,Ms08t229800.1,Ms11t313100.1,Ms04t106950.1,Ms08t223920.1,Ms11t307570.1,Ms03t068450.1	CKAN_02347600,CKAN_02392800,CKAN_00793900,CKAN_01915500	COCNU_HT001RO01_16T003680,COCNU_HT001RO01_01T002040,COCNU_HT001RO01_12T002620,COCNU_HT001RO01_05T008080,COCNU_HT001RO01_13T004190	lm5633.a03.4.g07170_p1,lm5633.a03.11.g04130_p1	LOC_Os05g29810.1,LOC_Os01g21120.1,LOC_Os03g08470.1	Glyma.07G244867.1,Glyma.03G258200.2	Zm00001e031438_T003,Zm00001e028920_T001,Zm00001e000609_T001	Zosma02g20100,Zosma02g22270,Zosma01g28040,Zosma05g05660,Zosma02g05080,Zosma06g21590,Zosma04g25320,Zosma03g18620,Zosma06g17350,Zosma05g20750	GO:0070483, GO:2000280, GO:0034059	detection of hypoxia, regulation of root development, response to anoxia
OG0000419	Wa8730a001g003820	AT5G27860.1	Ms08t212530.1	CKAN_00493200	COCNU_HT001RO01_01T002030	.	LOC_Os12g36740.1	Glyma.19G231600.1,Glyma.03G234200.1	Zm00001e039681_T003	Zosma01g27990,Zosma05g28880	GO:0004004, -, GO:0010501	RNA helicase activity, 0, RNA secondary structure unwinding
OG0000420	Wa8730a001g003830	AT3G16720.1,AT2G47560.1,AT4G15975.1	Ms05t139680.1,Ms08t224360.1,Ms11t307140.1	CKAN_02349500,CKAN_02391800	COCNU_HT001RO01_16T003780,COCNU_HT001RO01_12T004880,COCNU_HT001RO01_08T002160	lm5633.a03.4.g07130_p1	LOC_Os05g29710.1,LOC_Os05g07140.1,LOC_Os01g20910.1,LOC_Os03g22080.1,LOC_Os03g28080.1,LOC_Os02g50290.1	Glyma.17G028400.1,Glyma.07G245400.1,Glyma.03G215500.1,Glyma.09G042400.1,Glyma.19G212000.1	Zm00001e026193_T001,Zm00001e031439_T001,Zm00001e001605_T001,Zm00001e038229_T001,Zm00001e017509_T001,Zm00001e031105_T001	Zosma02g20200,Zosma02g23580,Zosma01g27570,Zosma02g04280,Zosma03g18660,Zosma05g20850,Zosma05g29860	GO:0010200, GO:0030100, GO:0061630	response to chitin, regulation of endocytosis, ubiquitin protein ligase activity
OG0000421	Wa8730a001g003840	AT3G06110.2,AT3G23610.2	Ms03t053740.1,Ms09t254870.1,Ms09t269680.1,Ms11t314780.1	CKAN_02349600,CKAN_00493100,CKAN_02391700	COCNU_HT001RO01_04T010420,COCNU_HT001RO01_01T002020,COCNU_HT001RO01_12T005000	lm5633.a03.4.g07150_p1	LOC_Os01g24470.1,LOC_Os01g20940.1	.	Zm00001e026249_T001,Zm00001e017512_T001	Zosma02g17550,Zosma02g22900	GO:0010119, GO:0008138, GO:0006470	regulation of stomatal movement, protein tyrosine/serine/threonine phosphatase activity, protein dephosphorylation
OG0000422	Wa8730a001g003850	AT3G05625.1	Ms08t212520.1	CKAN_02350100	COCNU_HT001RO01_01T001990	lm5633.a03.4.g07120_p1	LOC_Os01g24090.1	Glyma.10G150300.1,Glyma.20G237950.1	Zm00001e026254_T001	Zosma02g23600	-	0
OG0000423	Wa8730a001g003860	AT3G05630.1,AT3G16785.1	Ms09t254890.1,Ms02t023690.1,Ms11t303660.1,Ms01t002510.1	CKAN_02350200,CKAN_00492800	COCNU_HT001RO01_16T003810	lm5633.a03.4.g07100_p1	LOC_Os05g29050.2,LOC_Os01g20860.1	Glyma.10G150250.1,Glyma.15G152100.1,Glyma.09G041400.4,Glyma.20G238000.3	Zm00001e026171_T007,Zm00001e031443_T001	Zosma02g23610,Zosma03g18670	GO:0009395, GO:0004630, GO:0019375	phospholipid catabolic process, phospholipase D activity, galactolipid biosynthetic process
OG0000424	Wa8730a001g003870	AT2G47510.1	Ms11t317940.1	CKAN_02391500	COCNU_HT001RO01_16T003840	lm5633.a03.4.g07090_p1	LOC_Os03g21950.1	Glyma.10G016200.1,Glyma.02G015800.1	Zm00001e001600_T002	Zosma04g19680	GO:0006106, GO:0016999, GO:0006979	fumarate metabolic process, antibiotic metabolic process, response to oxidative stress
OG0000425	Wa8730a001g003880	AT3G16830.1,AT5G27030.1	Ms02t023670.1,Ms11t303640.1,Ms01t004420.1	CKAN_00492500,CKAN_02391400	COCNU_HT001RO01_16T003850,COCNU_HT001RO01_01T017940	lm5633.a03.20.g05680_p1,lm5633.a03.4.g07080_p1	LOC_Os01g15020.2	Glyma.19G230500.1,Glyma.03G233400.1	Zm00001e017248_T001,Zm00001e025577_T005	Zosma02g16750	GO:0009933, GO:0010072, GO:0048508	meristem structural organization, primary shoot apical meristem specification, embryonic meristem development
OG0000426	Wa8730a001g003890	.	Ms05t117420.1,Ms11t315220.1	CKAN_00302400	COCNU_HT001RO01_12T004610,COCNU_HT001RO01_04T007020	lm5633.a03.20.g05810_p1,lm5633.a03.4.g07060_p1	.	.	Zm00001e039666_T001	Zosma02g19660,Zosma03g27590	GO:0000398, GO:0071006, GO:0071013	mRNA splicing, via spliceosome, U2-type catalytic step 1 spliceosome, catalytic step 2 spliceosome
OG0000427	Wa8730a001g003900	AT3G06770.2,AT3G16850.1,AT3G62110.1,AT5G49215.1	Ms08t212190.1,Ms02t026290.1,Ms11t310800.1,Ms05t116550.1,Ms11t314750.1,Ms11t307230.1	CKAN_02447900,CKAN_02351000,CKAN_00492400,CKAN_00305500	COCNU_HT001RO01_01T001930,COCNU_HT001RO01_12T002780	lm5633.a03.4.g07070_p1	LOC_Os11g43750.1,LOC_Os12g36810.1	Glyma.17G029700.1,Glyma.10G016100.1,Glyma.02G015600.1,Glyma.07G244200.1,Glyma.03G224600.1,Glyma.15G146800.1,Glyma.09G041000.1,Glyma.19G221600.1	Zm00001e039674_T002,Zm00001e021051_T001	Zosma06g17440	-	0
OG0000428	Wa8730a001g003910	.	Ms01t018450.1,Ms07t182700.1	CKAN_02351600,CKAN_02390300	COCNU_HT001RO01_12T002750	lm5633.a03.4.g07000_p1	.	.	.	.	-	0
OG0000429	Wa8730a001g003920	AT3G06720.2,AT1G02690.1,AT4G02150.1,AT1G09270.1,AT5G49310.1,AT4G16143.1	Ms05t143730.1,Ms08t212510.1,Ms08t228460.1,Ms03t070600.1	CKAN_00491400,CKAN_02390200	COCNU_HT001RO01_01T000880,COCNU_HT001RO01_12T002760	lm5633.a03.20.g05850_p1,lm5633.a03.4.g07010_p1,lm5633.a03.11.g03960_p1	LOC_Os05g06350.1,LOC_Os07g48880.1,LOC_Os01g24060.1,LOC_Os01g14950.1	Glyma.17G031000.1,Glyma.19G229800.1,Glyma.03G232800.1,Glyma.07G242900.1,Glyma.10G148800.1,Glyma.15G144800.3,Glyma.09G039600.1,Glyma.20G239200.2	Zm00001e026752_T003,Zm00001e017243_T001,Zm00001e025581_T001,Zm00001e031157_T001	Zosma01g33290,Zosma03g19920	GO:0008565, GO:0005829, GO:0031981	obsolete protein transporter activity, cytosol, nuclear lumen
OG0000430	Wa8730a001g003930	AT1G71000.1,AT1G56300.1,AT3G14200.1	Ms03t053780.1,Ms09t254970.1,Ms11t303840.1	CKAN_02351500,CKAN_01449300	COCNU_HT001RO01_16T003970	lm5633.a03.20.g05840_p1,lm5633.a03.4.g07020_p1	LOC_Os03g18870.1	Glyma.19G229700.2,Glyma.03G232700.1,Glyma.03G216900.1,Glyma.19G213500.1	Zm00001e001378_T001,Zm00001e026803_T001,Zm00001e038372_T002	Zosma02g20060,Zosma02g05010	GO:0030018, GO:0030017, GO:0044449	Z disc, sarcomere, obsolete contractile fiber part
OG0000431	Wa8730a001g003940	AT4G02500.1,AT3G62720.1	Ms08t228560.1,Ms01t016570.1	.	COCNU_HT001RO01_16T003870,COCNU_HT001RO01_02T016320	lm5633.a03.20.g05830_p1,lm5633.a03.4.g07030_p1	LOC_Os03g18820.2	Glyma.03G213400.2,Glyma.15G148000.2,Glyma.09G044800.3,Glyma.19G210200.1	Zm00001e001366_T001,Zm00001e038381_T001	Zosma01g33330,Zosma05g21090	GO:0048767, GO:0033843, GO:0035252	root hair elongation, xyloglucan 6-xylosyltransferase activity, UDP-xylosyltransferase activity
OG0000432	Wa8730a001g003950	AT2G40650.1	Ms03t066610.1	.	COCNU_HT001RO01_02T016390	lm5633.a03.20.g05820_p1,lm5633.a03.4.g07050_p1	.	Glyma.10G149900.1,Glyma.20G238500.1	.	Zosma06g23020	GO:0005634, GO:0071011, GO:0044428	nucleus, precatalytic spliceosome, obsolete nuclear part
OG0000433	Wa8730a001g003960	AT3G06260.1,AT1G02720.1,AT4G02130.1,AT3G62660.1,AT1G70090.1,AT1G13250.1	Ms08t212010.1,Ms08t216110.1,Ms06t172480.1,Ms11t321380.1,Ms02t023730.1,Ms07t198070.1,Ms11t303620.1,Ms11t317020.1,Ms10t296920.1,Ms04t098800.1,Ms05t127690.1	CKAN_00491300,CKAN_02390600,CKAN_00410500	COCNU_HT001RO01_01T017820	lm5633.a03.4.g05680_p1	LOC_Os03g18890.1,LOC_Os03g24510.1,LOC_Os02g50600.1,LOC_Os07g45260.1	Glyma.17G020100.1,Glyma.10G015900.1,Glyma.02G015300.4,Glyma.07G254100.1,Glyma.03G217600.1,Glyma.19G214200.1,Glyma.13G067900.1,Glyma.02G059400.1	Zm00001e001382_T003,Zm00001e001733_T001,Zm00001e038370_T001,Zm00001e007430_T001	Zosma02g23640,Zosma03g27230,Zosma01g27920,Zosma03g32930,Zosma03g19930,Zosma05g29060	GO:0012505, GO:0048363, GO:0005737	endomembrane system, mucilage pectin metabolic process, cytoplasm
OG0000434	Wa8730a001g003970	AT3G16860.1,AT5G49270.1,AT5G26940.1,AT4G16120.1,AT3G20580.1,AT4G27110.1	Ms08t216120.1,Ms08t228550.1,Ms02t023830.1,Ms11t312680.1,Ms03t068210.1	CKAN_02352400,CKAN_00491100,CKAN_02390900,CKAN_01743900	COCNU_HT001RO01_16T004010,COCNU_HT001RO01_04T010460	lm5633.a03.4.g05660_p1	LOC_Os03g18910.1,LOC_Os07g49080.1,LOC_Os06g47110.1	Glyma.17G030700.1,Glyma.19G230000.1,Glyma.03G233000.1,Glyma.07G243200.1,Glyma.10G148900.1,Glyma.09G039900.1	Zm00001e001386_T001,Zm00001e035133_T001	Zosma01g27910,Zosma02g05220,Zosma03g31940,Zosma03g19940	GO:0010054, GO:0000738, GO:0048765	trichoblast differentiation, DNA catabolic process, exonucleolytic, root hair cell differentiation
OG0000435	Wa8730a001g003980	AT1G09160.1,AT5G27930.1,AT1G47380.1	Ms05t139920.1,Ms08t216150.1,Ms08t228420.1,Ms11t309100.1,Ms02t023840.1,Ms08t224020.1	CKAN_02451600,CKAN_02353100,CKAN_01913800	COCNU_HT001RO01_16T004070,COCNU_HT001RO01_04T010570,COCNU_HT001RO01_01T017670,COCNU_HT001RO01_13T004030	lm5633.a03.4.g05610_p1	LOC_Os03g18970.1,LOC_Os07g49040.1,LOC_Os03g27780.2	Glyma.19G230200.1,Glyma.03G233300.1,Glyma.10G149600.1,Glyma.20G238700.1	Zm00001e035930_T001,Zm00001e011012_T003,Zm00001e038366_T001,Zm00001e017684_T001	Zosma02g18050,Zosma01g33240	GO:1904526, GO:0005886, GO:0071944	regulation of microtubule binding, plasma membrane, cell periphery
OG0000436	Wa8730a001g003990	AT5G27730.1	Ms05t138650.1,Ms03t053610.1,Ms02t026600.1,Ms01t002640.1	CKAN_02353400,CKAN_00496300	COCNU_HT001RO01_16T003500,COCNU_HT001RO01_02T016180	lm5633.a03.4.g05700_p1	LOC_Os01g70550.1,LOC_Os05g06360.1	Glyma.10G015300.1,Glyma.02G014666.1,Glyma.19G233000.1,Glyma.03G235250.5	Zm00001e026756_T001,Zm00001e028381_T003	Zosma03g21310	-	0
OG0000437	Wa8730a001g004000	AT5G27730.1	Ms05t138650.1,Ms03t053610.1,Ms02t026600.1,Ms01t002640.1	CKAN_02353400,CKAN_00496300	COCNU_HT001RO01_16T003500,COCNU_HT001RO01_02T016180	lm5633.a03.4.g05700_p1	LOC_Os01g70550.1,LOC_Os05g06360.1	Glyma.10G015300.1,Glyma.02G014666.1,Glyma.19G233000.1,Glyma.03G235250.5	Zm00001e026756_T003,Zm00001e028381_T003	Zosma03g21310	-	0
OG0000438	Wa8730a001g004010	.	.	.	.	.	.	.	.	.
OG0000439	Wa8730a001g004020	.	Ms05t138650.1,Ms02t026600.1,Ms01t002640.1	CKAN_02353400	COCNU_HT001RO01_02T016180	lm5633.a03.4.g05700_p1	LOC_Os05g06360.1	Glyma.10G015300.1,Glyma.02G014666.1,Glyma.19G233000.1,Glyma.03G235250.5	Zm00001e026756_T001	Zosma03g21310	-	0
OG0000440	Wa8730a001g004030	AT5G27730.1	Ms05t138650.1,Ms03t053610.1,Ms02t026600.1,Ms01t002640.1	CKAN_02353400,CKAN_00496300	COCNU_HT001RO01_16T003500,COCNU_HT001RO01_02T016180	lm5633.a03.4.g05700_p1	LOC_Os01g70550.1,LOC_Os05g06360.1	Glyma.10G015300.1,Glyma.19G233000.1,Glyma.03G235250.1	Zm00001e026756_T003,Zm00001e028381_T006	Zosma03g21310	-	0
OG0000442	Wa8730a001g004040	AT2G47470.1,AT4G27080.1	Ms02t026590.1,Ms11t310830.1	.	COCNU_HT001RO01_01T001390,COCNU_HT001RO01_12T002860	lm5633.a03.4.g05770_p1	LOC_Os05g06430.2,LOC_Os01g23740.1	Glyma.10G014700.1,Glyma.02G014000.3,Glyma.19G229000.2,Glyma.03G232000.1	Zm00001e017599_T002,Zm00001e031143_T002	Zosma01g27790,Zosma06g18250,Zosma05g32240	GO:0012505, GO:0006457, GO:0003756	endomembrane system, protein folding, protein disulfide isomerase activity
OG0000443	Wa8730a001g004050	AT3G62630.1	Ms05t138360.1,Ms08t212480.1,Ms03t070680.1,Ms11t303550.1	CKAN_02354300,CKAN_00836700,CKAN_01445500	COCNU_HT001RO01_01T001430,COCNU_HT001RO01_12T002880	lm5633.a03.4.g05760_p1	LOC_Os03g19090.1,LOC_Os11g44920.1	Glyma.19G229100.1,Glyma.03G232100.1,Glyma.10G148100.1,Glyma.20G239500.1	Zm00001e001395_T001,Zm00001e038357_T001,Zm00001e021027_T001	Zosma02g23690	-	0
OG0000444	Wa8730a001g004060	AT3G05750.1,AT5G26910.1	Ms11t321520.1,Ms08t228520.1,Ms08t239180.1,Ms04t094550.1	CKAN_02354200,CKAN_02389200	COCNU_HT001RO01_16T004190,COCNU_HT001RO01_01T001440,COCNU_HT001RO01_12T002890	lm5633.a03.4.g05750_p1,lm5633.a03.11.g03830_p1	LOC_Os03g19080.1	Glyma.17G031500.1,Glyma.19G229200.1,Glyma.07G242700.1,Glyma.10G148200.1,Glyma.15G144100.1,Glyma.09G039000.1	Zm00001e001394_T001,Zm00001e038358_T001	Zosma01g27830,Zosma01g33190	GO:0043140, -, GO:0009378	3'-5' DNA helicase activity, 0, four-way junction helicase activity
OG0000445	Wa8730a001g004070	AT2G47460.1,AT3G62610.1,AT5G49330.1,AT3G13540.1,AT4G28110.1,AT3G23250.1,AT2G32460.1,AT1G56160.1,AT5G54230.1,AT5G56110.1,AT4G26930.1	Ms05t138350.1,Ms03t053450.1,Ms09t253370.1,Ms08t216190.1,Ms02t027410.1,Ms08t239210.1,Ms05t122570.1,Ms02t023850.1,Ms07t200960.1,Ms11t303540.1,Ms01t002690.1,Ms01t018480.1,Ms11t319130.1,Ms05t117500.1,Ms04t107020.1,Ms04t096270.1,Ms08t223710.1,Ms05t127760.1,Ms03t067610.1	CKAN_02446500,CKAN_02354700,CKAN_00490300,CKAN_02389100,CKAN_02285300,CKAN_00807200,CKAN_01745900,CKAN_01445700,CKAN_00354600,CKAN_01707600	COCNU_HT001RO01_16T004220,COCNU_HT001RO01_01T000120,COCNU_HT001RO01_04T005980	lm5633.a03.4.g05780_p1,lm5633.a03.11.g03730_p1	LOC_Os03g19120.1,LOC_Os01g19970.1,LOC_Os03g29614.1,LOC_Os07g44090.3,LOC_Os02g46780.1	Glyma.17G031600.1,Glyma.10G014600.1,Glyma.02G013900.1,Glyma.07G242600.1,Glyma.03G218200.1,Glyma.15G144000.1,Glyma.09G038900.1,Glyma.19G214900.1	Zm00001e001410_T001,Zm00001e026184_T001,Zm00001e038356_T001,Zm00001e018193_T002,Zm00001e007422_T001,Zm00001e017496_T002,Zm00001e035233_T001	Zosma02g18260,Zosma03g30130,Zosma06g18070,Zosma05g20970,Zosma05g25950	GO:0010224, GO:0044212, GO:0001076	response to UV-B, transcription regulatory region sequence-specific DNA binding, obsolete transcription factor activity, RNA polymerase II transcription factor binding
OG0000447	Wa8730a001g004080	AT4G16144.1	Ms03t070690.1,Ms10t288080.1,Ms08t223810.1	CKAN_02354800,CKAN_01093600	COCNU_HT001RO01_12T002850	lm5633.a03.4.g05790_p1	LOC_Os01g23640.1	Glyma.17G031700.1,Glyma.07G242500.1	Zm00001e026340_T001,Zm00001e017595_T001	Zosma01g27770,Zosma04g19070	GO:0070536, GO:0044090, GO:0071108	protein K63-linked deubiquitination, positive regulation of vacuole organization, protein K48-linked deubiquitination
OG0000448	Wa8730a001g004090	AT3G62600.1,AT4G28480.2,AT2G26890.1,AT2G41000.1	Ms09t253010.1,Ms06t172620.1,Ms08t239200.1,Ms11t310840.1,Ms01t018470.1,Ms11t314620.1,Ms01t016260.1	CKAN_02453700,CKAN_02351500,CKAN_02401000,CKAN_00412500,CKAN_01092300	COCNU_HT001RO01_01T001360,COCNU_HT001RO01_12T002840	lm5633.a03.4.g05810_p1	LOC_Os05g06440.1,LOC_Os03g18200.1,LOC_Os02g50760.1	Glyma.02G013800.1,Glyma.03G218300.1,Glyma.15G149100.1,Glyma.19G215100.1	Zm00001e026262_T001,Zm00001e026700_T001,Zm00001e018227_T001,Zm00001e031139_T002	Zosma02g16180,Zosma02g05010,Zosma06g22060	GO:0052255, GO:0052509, GO:0052308	modulation by symbiont of host defense response, induction by symbiont of host defense response, obsolete pathogen-associated molecular pattern dependent modulation by organism of innate immune response in other organism involved in symbiotic interaction
OG0000449	Wa8730a001g004100	AT1G02660.1,AT3G62590.1	Ms05t138340.1,Ms11t308830.1,Ms03t071490.1,Ms11t303530.1	CKAN_02355000,CKAN_02388400	COCNU_HT001RO01_16T004240	lm5633.a03.4.g05830_p1	LOC_Os01g15000.1	Glyma.10G014400.1,Glyma.02G013700.1,Glyma.03G218400.1,Glyma.19G215200.1,Glyma.03G256900.1,Glyma.19G255100.5	Zm00001e025578_T001	Zosma02g20220,Zosma01g27760,Zosma05g06620	GO:0015908, -, GO:0052739	fatty acid transport, 0, phosphatidylserine 1-acylhydrolase activity
OG0000450	Wa8730a001g004110	AT3G04340.1,AT3G56690.1	Ms08t214510.1,Ms08t224350.1	CKAN_02453600	COCNU_HT001RO01_05T006750	lm5633.a03.4.g05840_p1	.	Glyma.20G227000.1	.	Zosma02g16590,Zosma03g33320,Zosma03g20120,Zosma05g25510	GO:0009941, GO:0004176, GO:0008237	chloroplast envelope, ATP-dependent peptidase activity, metallopeptidase activity
OG0000451	Wa8730a001g004120	AT1G02640.1,AT3G62710.1,AT5G49360.1	Ms05t140270.1,Ms11t310860.1,Ms04t098810.1,Ms05t127660.1	CKAN_02355400,CKAN_00490100,CKAN_00302300,CKAN_00694600	COCNU_HT001RO01_01T001330,COCNU_HT001RO01_05T006730	lm5633.a03.4.g05910_p1	LOC_Os11g44950.2	Glyma.10G013900.1,Glyma.02G013300.1,Glyma.03G218700.1,Glyma.15G143700.1,Glyma.09G038600.1,Glyma.19G215500.1	Zm00001e026163_T001,Zm00001e021024_T001,Zm00001e007432_T001	Zosma03g33300	GO:0048046, GO:0046556, GO:0009505	apoplast, alpha-L-arabinofuranosidase activity, plant-type cell wall
OG0000452	Wa8730a001g004130	AT3G04600.1	Ms11t306850.1	.	.	lm5633.a03.4.g05900_p1	LOC_Os12g35570.1	.	.	Zosma01g29130,Zosma04g19210	GO:0006412, GO:0006436, GO:0004830	translation, tryptophanyl-tRNA aminoacylation, tryptophan-tRNA ligase activity
OG0000453	Wa8730a001g004140	AT2G47440.1,AT1G02650.1,AT4G02100.1,AT3G62570.1	Ms05t138330.1,Ms08t216200.1,Ms11t303520.1,Ms11t317050.1,Ms01t016510.1	CKAN_02355300	COCNU_HT001RO01_16T004260,COCNU_HT001RO01_04T010650	lm5633.a03.4.g05870_p1	LOC_Os03g19200.1,LOC_Os07g49000.1	Glyma.10G014000.3,Glyma.02G013402.1,Glyma.03G218600.1,Glyma.19G215400.1	Zm00001e001414_T003,Zm00001e035928_T001,Zm00001e011009_T001,Zm00001e017287_T002,Zm00001e038347_T002	Zosma02g23790,Zosma01g27750,Zosma01g33160,Zosma03g33050	GO:0031072, -, GO:0051085	heat shock protein binding, 0, chaperone cofactor-dependent protein refolding
OG0000454	Wa8730a001g004150	AT4G02110.1	Ms08t228510.1	CKAN_02355200	COCNU_HT001RO01_04T010660	lm5633.a03.4.g05860_p1	LOC_Os03g19190.1,LOC_Os07g49010.1	Glyma.10G014100.3,Glyma.02G013500.1	Zm00001e001412_T003,Zm00001e035929_T001,Zm00001e025534_T001	Zosma01g33170	-	0
OG0000455	Wa8730a001g004160	AT3G16910.1	Ms01t002130.1,Ms11t318860.1,Ms07t183000.1	CKAN_02453800,CKAN_00489900	COCNU_HT001RO01_16T004280,COCNU_HT001RO01_04T010670	lm5633.a03.4.g05950_p1	LOC_Os03g19240.1,LOC_Os01g24030.1	Glyma.17G031800.1,Glyma.07G242100.1,Glyma.09G029900.1	Zm00001e001419_T002,Zm00001e038349_T001,Zm00001e030943_T001	Zosma05g06550,Zosma06g21680,Zosma05g29020,Zosma05g03960	GO:0006097, GO:0019605, GO:0005777	glyoxylate cycle, butyrate metabolic process, peroxisome
OG0000456	Wa8730a001g004170	AT1G02620.1,AT4G02080.1,AT1G09180.1,AT3G62560.1,AT3G22950.1,AT1G56330.1	Ms08t212440.1,Ms08t216220.1,Ms11t321500.1,Ms02t026230.1,Ms11t311100.1,Ms11t303470.1,Ms11t314730.1	CKAN_02471800,CKAN_02355500,CKAN_02388000,CKAN_01094800	COCNU_HT001RO01_16T004330,COCNU_HT001RO01_01T001320,COCNU_HT001RO01_12T003070	lm5633.a03.4.g05940_p1,lm5633.a03.8.g07350_p1	LOC_Os01g23620.1,LOC_Os01g15010.1,LOC_Os12g37360.1	Glyma.17G032100.1,Glyma.19G228800.1,Glyma.03G231800.1,Glyma.07G241800.1,Glyma.10G147800.1,Glyma.15G143300.1,Glyma.09G038200.1,Glyma.20G239600.1	Zm00001e026263_T001,Zm00001e017247_T001,Zm00001e017591_T001	Zosma02g23740,Zosma06g22070	GO:0006888, GO:0005525, GO:0005886	endoplasmic reticulum to Golgi vesicle-mediated transport, GTP binding, plasma membrane
OG0000457	Wa8730a001g004180	AT2G47710.1,AT3G62550.1,AT5G54430.1	Ms08t212610.1,Ms11t311110.1,Ms05t116610.1,Ms10t296790.1,Ms01t016500.1	CKAN_02454100,CKAN_02357900,CKAN_02284400,CKAN_01443500	COCNU_HT001RO01_16T003520,COCNU_HT001RO01_04T010940,COCNU_HT001RO01_12T002970	lm5633.a03.4.g05960_p1	LOC_Os05g28740.1,LOC_Os05g06500.1,LOC_Os03g19270.3,LOC_Os01g19820.2,LOC_Os03g22390.1	Glyma.10G013700.1,Glyma.02G013100.1,Glyma.19G228700.1,Glyma.03G231700.4,Glyma.10G147700.1,Glyma.20G098451.1	Zm00001e026208_T001,Zm00001e039685_T001,Zm00001e028942_T001,Zm00001e031131_T001	Zosma02g22340,Zosma02g03010,Zosma06g22080	GO:0005886, GO:0016208, GO:0008144	plasma membrane, AMP binding, drug binding
OG0000458	Wa8730a001g004190	AT3G17020.1,AT2G47710.1,AT3G62550.1	Ms08t212610.1,Ms11t311110.1,Ms05t116610.1,Ms10t296790.1,Ms04t106860.1,Ms01t016500.1	CKAN_02454200,CKAN_01443500	COCNU_HT001RO01_16T003520,COCNU_HT001RO01_04T010940,COCNU_HT001RO01_12T002970	lm5633.a03.4.g05970_p1	LOC_Os05g28740.1,LOC_Os03g19270.3,LOC_Os01g19820.1	Glyma.10G013700.1,Glyma.19G228700.1,Glyma.03G231700.1,Glyma.10G147700.1,Glyma.20G098451.1,Glyma.19G215800.1,Glyma.02G167700.1	Zm00001e026208_T001	Zosma02g22340,Zosma02g03010,Zosma06g22080	GO:0005886, GO:0008144, GO:0016208	plasma membrane, drug binding, AMP binding
OG0000459	Wa8730a001g004200	AT1G02610.1,AT4G02075.1	Ms05t138280.1,Ms03t053820.1,Ms09t254940.1,Ms08t216240.1,Ms06t174090.1,Ms04t087390.1,Ms08t223700.1	CKAN_02454300,CKAN_02355800,CKAN_00489800,CKAN_01444700,CKAN_00691400	COCNU_HT001RO01_04T010960	lm5633.a03.4.g05980_p1	LOC_Os05g28730.1,LOC_Os01g19800.1	Glyma.10G013600.1,Glyma.02G013000.1,Glyma.03G219000.1,Glyma.19G215900.1	Zm00001e026209_T002,Zm00001e031477_T004,Zm00001e017493_T002	Zosma02g19610,Zosma01g27740,Zosma04g25300	GO:0012505, GO:0005783, GO:0016567	endomembrane system, endoplasmic reticulum, protein ubiquitination
OG0000460	Wa8730a001g004210	AT4G02070.1	Ms05t141300.1	CKAN_00489700	COCNU_HT001RO01_08T001840	lm5633.a03.4.g05990_p1	LOC_Os09g24220.1	Glyma.03G219033.1,Glyma.19G216000.1	.	Zosma06g22090	GO:0032300, GO:0006298, GO:0043570	mismatch repair complex, mismatch repair, maintenance of DNA repeat elements
OG0000461	Wa8730a001g004220	AT1G56345.1	Ms08t239770.1	CKAN_02356200,CKAN_01591700	COCNU_HT001RO01_01T001270	.	LOC_Os12g37380.1	Glyma.20G098200.1	Zm00001e018217_T003	Zosma01g27730	GO:0010467, GO:0009982, GO:0031119	gene expression, pseudouridine synthase activity, tRNA pseudouridine synthesis
OG0000462	Wa8730a001g004230	AT3G13230.1	Ms06t162790.1	.	.	lm5633.a03.4.g06030_p1	.	.	Zm00001e019595_T001,Zm00001e028933_T001	Zosma04g19230,Zosma05g04050	GO:0044428, GO:0005730, GO:0031981	obsolete nuclear part, nucleolus, nuclear lumen
OG0000463	Wa8730a001g004240	AT4G02060.2	Ms02t026570.1,Ms11t306470.1	CKAN_02356600,CKAN_00355800	COCNU_HT001RO01_01T001250,COCNU_HT001RO01_12T003030	lm5633.a03.4.g06040_p1	LOC_Os12g37400.1	Glyma.17G035000.1,Glyma.03G219200.1,Glyma.19G216100.1	Zm00001e031913_T001,Zm00001e018214_T003	Zosma03g27110,Zosma01g27680,Zosma03g31750	GO:0006268, GO:0010182, GO:0000347	DNA unwinding involved in DNA replication, sugar mediated signaling pathway, THO complex
OG0000464	Wa8730a001g004250	AT3G05790.2,AT5G26860.1	Ms01t002850.1	CKAN_02356800,CKAN_00489400	COCNU_HT001RO01_16T004490,COCNU_HT001RO01_01T001230	lm5633.a03.4.g06540_p1	LOC_Os03g19350.1,LOC_Os07g48960.1	Glyma.10G147200.2,Glyma.20G097700.1,Glyma.06G236800.1	Zm00001e001424_T001,Zm00001e035924_T003,Zm00001e011005_T001	Zosma05g20320	GO:0044257, GO:0044429, GO:0005739	cellular protein catabolic process, obsolete mitochondrial part, mitochondrion
OG0000465	Wa8730a001g004260	AT3G16990.1	Ms11t303420.1	CKAN_02455100	COCNU_HT001RO01_16T004450	lm5633.a03.4.g06510_p1	LOC_Os03g19390.1	Glyma.17G032700.1,Glyma.07G240701.1	Zm00001e038337_T002	Zosma05g31990	GO:0005737, GO:0005829, GO:0044444	cytoplasm, cytosol, obsolete cytoplasmic part
OG0000466	Wa8730a001g004270	.	Ms08t227550.1,Ms10t271650.1	.	.	.	.	.	.	.	GO:0030850, GO:1905577, GO:0007193	prostate gland development, ganglioside GP1c binding, adenylate cyclase-inhibiting G protein-coupled receptor signaling pathway
OG0000467	Wa8730a001g004280	AT2G47390.1	.	CKAN_02386800	.	lm5633.a03.4.g06500_p1	LOC_Os03g19410.1,LOC_Os07g48970.2	Glyma.03G219500.3,Glyma.19G216400.5	Zm00001e001435_T001	Zosma02g23830	GO:0044435, GO:0009570, GO:0044434	obsolete plastid part, chloroplast stroma, obsolete chloroplast part
OG0000468	Wa8730a001g004290	.	.	.	.	.	.	.	.	.
OG0000469	Wa8730a001g004300	AT1G02580.1,AT4G02020.1,AT3G61740.1	Ms01t016480.1	CKAN_02455200	COCNU_HT001RO01_16T004410	lm5633.a03.4.g06450_p1	LOC_Os03g19480.1	Glyma.10G012600.2,Glyma.02G012100.1,Glyma.03G219800.1,Glyma.19G216601.1	Zm00001e001446_T001,Zm00001e038328_T003	Zosma02g18570	GO:0009646, GO:0006349, GO:0051276	response to absence of light, regulation of gene expression by genetic imprinting, chromosome organization
OG0000470	Wa8730a001g004310	AT5G04950.1,AT1G09240.1,AT1G56430.1,AT5G56080.1	Ms05t138200.1,Ms02t023870.1,Ms11t317090.1	CKAN_02357000,CKAN_01920400	COCNU_HT001RO01_16T004440,COCNU_HT001RO01_04T011030	lm5633.a03.4.g06490_p1,lm5633.a03.11.g03770_p1	LOC_Os03g19420.2,LOC_Os07g48980.1	Glyma.19G228400.1,Glyma.03G231200.1,Glyma.09G036400.1	Zm00001e001441_T001,Zm00001e038334_T001,Zm00001e012379_T001	Zosma01g27610,Zosma03g19790	GO:0010233, GO:0044706, GO:0030154	phloem transport, multi-multicellular organism process, cell differentiation
OG0000471	Wa8730a001g004320	AT1G70510.1	Ms08t216280.1,Ms02t023880.1,Ms11t303400.1	CKAN_02357100	COCNU_HT001RO01_16T004430,COCNU_HT001RO01_04T011040	lm5633.a03.4.g06480_p1	LOC_Os01g19694.1	Glyma.14G047000.1,Glyma.19G228300.2,Glyma.03G231100.7,Glyma.10G147000.1,Glyma.20G097500.1	Zm00001e017489_T001,Zm00001e029453_T001	Zosma03g27300,Zosma01g33130,Zosma05g32180,Zosma05g26010	GO:0048440, GO:0010094, GO:0048462	carpel development, specification of carpel identity, carpel formation
OG0000472	Wa8730a001g004330	AT5G56270.1	Ms08t208250.1	.	.	.	LOC_Os01g74140.1	.	Zm00001e029445_T001	Zosma06g22960,Zosma05g32290	GO:0009961, GO:0003700, GO:0045893	response to 1-aminocyclopropane-1-carboxylic acid, DNA-binding transcription factor activity, positive regulation of transcription, DNA-templated
OG0000473	Wa8730a001g004340	AT3G14750.1	Ms06t171420.1,Ms08t227970.1,Ms10t271300.1	CKAN_00447100,CKAN_00839000	COCNU_HT001RO01_12T004870,COCNU_HT001RO01_04T006550,COCNU_HT001RO01_08T001880	lm5633.a03.4.g06350_p1	LOC_Os08g33330.1	.	Zm00001e035071_T001	Zosma02g05160	-	0
OG0000474	Wa8730a001g004350	.	.	.	.	.	.	.	.	.
OG0000475	Wa8730a001g004360	AT5G05090.1,AT3G10760.1,AT2G40970.1	Ms05t144110.1,Ms08t211900.1,Ms02t026400.1,Ms11t311030.1,Ms10t281350.1	CKAN_02352500,CKAN_00491200,CKAN_00838300,CKAN_00311200,CKAN_00973900	COCNU_HT001RO01_16T003980,COCNU_HT001RO01_04T010470,COCNU_HT001RO01_12T004900,COCNU_HT001RO01_04T006520,COCNU_HT001RO01_01T016620	lm5633.a03.4.g06340_p1	LOC_Os07g48596.1,LOC_Os01g74020.1	Glyma.03G123400.2,Glyma.19G127000.1,Glyma.02G162600.1	.	Zosma02g23910,Zosma05g20000	GO:0051193, GO:0048507, GO:0009736	obsolete regulation of cofactor metabolic process, meristem development, cytokinin-activated signaling pathway
OG0000476	Wa8730a001g004370	.	Ms11t303830.1,Ms04t078140.1	CKAN_00446100,CKAN_00311300,CKAN_00975300,CKAN_00696300	COCNU_HT001RO01_16T004090,COCNU_HT001RO01_04T006510	lm5633.a03.4.g06330_p1,lm5633.a03.15.g04890_p1	LOC_Os12g04080.1,LOC_Os03g08720.1	.	Zm00001e035958_T001,Zm00001e024076_T001,Zm00001e000633_T001	Zosma02g03750	GO:0090431, GO:0050734, GO:0033809	alkyl caffeate ester biosynthetic process, hydroxycinnamoyltransferase activity, anthocyanin 6''-O-malonyltransferase activity
OG0000477	Wa8730a001g004380	AT2G26760.1	Ms04t087260.1,Ms03t071370.1,Ms07t200790.1,Ms11t318880.1,Ms04t093640.1,Ms08t230040.1,Ms10t296660.1	CKAN_00837700,CKAN_00312200	COCNU_HT001RO01_12T004930,COCNU_HT001RO01_04T006470,COCNU_HT001RO01_16T000770	lm5633.a03.4.g06370_p1	LOC_Os01g59120.1,LOC_Os05g41390.1,LOC_Os01g17402.1	Glyma.14G037100.1,Glyma.03G123600.1,Glyma.19G127200.1,Glyma.02G277600.1	Zm00001e019528_T002,Zm00001e027336_T001,Zm00001e025467_T002,Zm00001e028899_T002	Zosma01g27530,Zosma04g25270	GO:0005737, GO:0001558, GO:0010332	cytoplasm, regulation of cell growth, response to gamma radiation
OG0000478	Wa8730a001g004390	AT5G05140.1	Ms05t123870.1	CKAN_00443000,CKAN_00837100,CKAN_00312700	COCNU_HT001RO01_04T006380,COCNU_HT001RO01_01T016460	lm5633.a03.4.g06380_p1,lm5633.a03.15.g04840_p1	.	Glyma.19G127800.1,Glyma.02G157800.1	.	.	GO:0006368, GO:0070449, -	transcription elongation from RNA polymerase II promoter, elongin complex, 0
OG0000479	Wa8730a001g004400	AT1G23100.1	Ms08t227940.1,Ms04t087920.1	CKAN_00440400,CKAN_00835400	COCNU_HT001RO01_12T004960,COCNU_HT001RO01_04T006340	lm5633.a03.4.g06390_p1	LOC_Os03g25050.1,LOC_Os07g44740.1	Glyma.03G125800.1,Glyma.19G128300.1,Glyma.07G219000.1	Zm00001e031904_T001,Zm00001e001760_T001	Zosma01g27480,Zosma06g21810,Zosma05g33670	GO:0009408, GO:0005739, GO:0005759	response to heat, mitochondrion, mitochondrial matrix
OG0000480	Wa8730a001g004410	.	Ms08t227870.1	CKAN_00832800	COCNU_HT001RO01_01T016030	lm5633.a03.4.g06200_p1	LOC_Os07g48810.1	Glyma.14G035700.1,Glyma.02G279000.1	Zm00001e035908_T002	Zosma03g30020	GO:0044444, GO:0009735, GO:0009507	obsolete cytoplasmic part, response to cytokinin, chloroplast
OG0000481	Wa8730a001g004420	AT5G21326.1,AT5G04870.1,AT3G10660.2,AT3G22930.1,AT2G41090.1,AT3G20410.1	Ms05t144170.1,Ms09t244500.1,Ms09t255770.1,Ms06t174160.1,Ms08t227890.1,Ms05t122530.1,Ms10t274520.1,Ms06t158360.1,Ms08t208150.1,Ms04t099370.1,Ms03t068190.1	CKAN_00433600,CKAN_00833000,CKAN_00314900,CKAN_01904400	COCNU_HT001RO01_12T005140,COCNU_HT001RO01_04T006270,COCNU_HT001RO01_01T016230,COCNU_HT001RO01_05T009010,COCNU_HT001RO01_13T003640,COCNU_HT001RO01_16T000320	lm5633.a03.4.g06210_p1,lm5633.a03.15.g04610_p1,lm5633.a03.11.g03460_p1,lm5633.a03.8.g07660_p1	LOC_Os11g04170.1,LOC_Os12g03970.1,LOC_Os03g20370.1,LOC_Os07g48780.1,LOC_Os01g59360.1,LOC_Os05g41270.1,LOC_Os03g25070.1,LOC_Os01g17190.1,LOC_Os07g44710.1,LOC_Os02g46090.1	Glyma.14G035800.1,Glyma.02G002100.1,Glyma.02G278900.1,Glyma.07G232400.1,Glyma.20G041500.1,Glyma.11G020200.1,Glyma.01G223200.1,Glyma.05G213200.1	Zm00001e019515_T001,Zm00001e024068_T001,Zm00001e017290_T001,Zm00001e009210_T001,Zm00001e027338_T002,Zm00001e018426_T001,Zm00001e028892_T001,Zm00001e035097_T001	Zosma02g18430,Zosma02g24030,Zosma01g27110,Zosma06g25910,Zosma02g04930,Zosma06g21820,Zosma04g20030,Zosma01g33080,Zosma01g42850,Zosma03g21880,Zosma05g32650	GO:0009931, GO:0023052, GO:0009738	calcium-dependent protein serine/threonine kinase activity, signaling, abscisic acid-activated signaling pathway
OG0000482	Wa8730a001g004430	AT1G08320.4	Ms08t211830.1,Ms09t254010.1,Ms11t321290.1,Ms08t227900.1,Ms11t311350.1,Ms03t071400.1,Ms02t024440.1,Ms10t274510.1,Ms07t198820.1	CKAN_00433700,CKAN_00833100,CKAN_00314800,CKAN_01893400	COCNU_HT001RO01_12T005130,COCNU_HT001RO01_08T001790,COCNU_HT001RO01_02T016490	lm5633.a03.4.g06220_p1,lm5633.a03.11.g03650_p1	LOC_Os03g20310.1,LOC_Os07g48820.1,LOC_Os01g59350.1,LOC_Os05g41280.1,LOC_Os01g17260.1	Glyma.03G127600.3,Glyma.19G130200.2,Glyma.15G232000.2	Zm00001e001495_T001,Zm00001e019519_T001,Zm00001e035907_T004,Zm00001e038293_T002,Zm00001e027337_T002,Zm00001e025471_T001,Zm00001e028893_T003,Zm00001e030941_T001	Zosma02g24010,Zosma03g28540,Zosma01g27420,Zosma02g03110,Zosma03g33180	GO:0045892, GO:0045893, GO:0023052	negative regulation of transcription, DNA-templated, positive regulation of transcription, DNA-templated, signaling
OG0000483	Wa8730a001g004440	.	Ms08t211850.1,Ms11t321310.1,Ms10t274500.1,Ms07t200820.1	CKAN_00434400,CKAN_00833300,CKAN_00314600	COCNU_HT001RO01_12T005090,COCNU_HT001RO01_04T006070	lm5633.a03.4.g06230_p1	LOC_Os01g59340.3,LOC_Os01g17279.1	Glyma.14G036000.1,Glyma.02G278600.1,Glyma.15G230500.1,Glyma.06G234800.1	Zm00001e019520_T004,Zm00001e017394_T001	Zosma02g18440,Zosma02g24000	GO:0043562, GO:0004157, GO:0006212	cellular response to nitrogen levels, dihydropyrimidinase activity, uracil catabolic process
OG0000484	Wa8730a001g004450	AT2G03780.1	Ms03t054720.1	CKAN_00314500	COCNU_HT001RO01_01T016710	lm5633.a03.4.g06250_p1	LOC_Os01g16100.1	Glyma.11G011400.1	Zm00001e025540_T001	Zosma04g25190	GO:0005634, GO:0044877, GO:0031687	nucleus, protein-containing complex binding, A2A adenosine receptor binding
OG0000485	Wa8730a001g004460	.	Ms03t054710.1,Ms11t316880.1,Ms11t312670.1	CKAN_00833400	COCNU_HT001RO01_01T016720	lm5633.a03.4.g06260_p1	LOC_Os07g44640.1	.	.	Zosma06g21830,Zosma05g33660	GO:0019919, GO:0035242, GO:0008469	peptidyl-arginine methylation, to asymmetrical-dimethyl arginine, protein-arginine omega-N asymmetric methyltransferase activity, histone-arginine N-methyltransferase activity
OG0000486	Wa8730a001g004470	AT5G21080.1,AT5G26850.2	Ms05t140960.1,Ms08t214820.1,Ms11t317140.1	CKAN_02455600,CKAN_00489000	COCNU_HT001RO01_16T004540,COCNU_HT001RO01_04T011080	lm5633.a03.4.g06440_p1	LOC_Os03g19520.1	Glyma.20G097001.3,Glyma.06G236651.1	Zm00001e001450_T003	Zosma01g27600	-	0
OG0000487	Wa8730a001g004480	AT3G15590.1	Ms05t144150.1,Ms11t321320.1,Ms08t227910.1	CKAN_00834100	COCNU_HT001RO01_04T010720,COCNU_HT001RO01_12T005020,COCNU_HT001RO01_04T006200,COCNU_HT001RO01_16T000350	lm5633.a03.4.g06280_p1,lm5633.a03.8.g07560_p1	LOC_Os01g17320.1,LOC_Os07g12140.1,LOC_Os01g73950.1	Glyma.03G127100.4,Glyma.02G000600.1,Glyma.19G129900.1	Zm00001e026211_T002,Zm00001e017396_T001,Zm00001e025470_T001,Zm00001e033119_T002	Zosma01g32790	GO:0009451, GO:0005739, GO:0003723	RNA modification, mitochondrion, RNA binding
OG0000488	Wa8730a001g004490	AT3G56720.1	Ms09t254430.1	CKAN_00834200,CKAN_00313900	.	lm5633.a03.4.g06300_p1	.	Glyma.02G166100.5	.	Zosma02g03120	GO:0000287, GO:0035371, GO:0043531	magnesium ion binding, microtubule plus-end, ADP binding
OG0000489	Wa8730a001g004500	AT2G26850.1,AT2G41170.1,AT2G32560.1	Ms02t024340.1	CKAN_00437900,CKAN_00834300,CKAN_00313700	COCNU_HT001RO01_04T006230,COCNU_HT001RO01_01T016680	lm5633.a03.4.g06310_p1,lm5633.a03.8.g07510_p1	LOC_Os01g59180.1,LOC_Os01g17390.1	Glyma.14G036300.1,Glyma.03G126600.1,Glyma.19G129600.1,Glyma.02G278300.1,Glyma.07G235500.1,Glyma.20G042200.1	Zm00001e019523_T002,Zm00001e017397_T001	Zosma02g23980,Zosma04g25220	-	0
OG0000490	Wa8730a001g004510	AT4G20760.2,AT5G04780.1,AT5G37570.1,AT1G56570.2	Ms05t139220.1,Ms08t212580.1,Ms09t255100.1,Ms02t026070.1,Ms11t310070.1,Ms07t196640.1,Ms11t302250.1,Ms06t158960.1,Ms04t078330.1,Ms08t220950.1,Ms10t297010.1	CKAN_02335300,CKAN_00450000,CKAN_02153400,CKAN_00326500,CKAN_01895000,CKAN_01746300,CKAN_01701100	COCNU_HT001RO01_16T004850,COCNU_HT001RO01_12T006060,COCNU_HT001RO01_02T016240,COCNU_HT001RO01_05T008700	lm5633.a03.4.g06460_p1	LOC_Os11g44930.1	Glyma.09G029700.1,Glyma.15G229600.1	Zm00001e001494_T001,Zm00001e038303_T001,Zm00001e021026_T001,Zm00001e025557_T001,Zm00001e000622_T001	Zosma02g16660,Zosma05g06580,Zosma02g02690,Zosma04g20260,Zosma03g33310,Zosma03g19510,Zosma05g19660,Zosma05g32700	GO:0003723, GO:0004519, GO:0090305	RNA binding, endonuclease activity, nucleic acid phosphodiester bond hydrolysis
OG0000491	Wa8730a001g004520	AT1G08410.1,AT2G27200.1	.	CKAN_01096700	.	lm5633.a03.4.g06270_p1	LOC_Os03g22890.1	.	.	.	GO:1900076, GO:0003924, GO:0042254	regulation of cellular response to insulin stimulus, GTPase activity, ribosome biogenesis
OG0000492	Wa8730a001g004530	AT3G22510.1	.	.	.	.	.	.	Zm00001e012353_T001	Zosma05g32780	-	0
OG0000493	Wa8730a001g004540	AT1G56440.1	Ms09t253380.1,Ms01t016470.1	CKAN_01285900,CKAN_00488900	COCNU_HT001RO01_16T004540	.	.	Glyma.10G146800.1,Glyma.20G096900.1,Glyma.06G236676.1	.	Zosma04g20350,Zosma03g19780	GO:0006626, GO:0097255, GO:0005829	protein targeting to mitochondrion, R2TP complex, cytosol
OG0000494	Wa8730a001g004550	AT5G21090.1,AT2G27060.1,AT5G56040.1	Ms05t141090.1,Ms09t245060.1,Ms08t227860.1,Ms05t123830.1,Ms06t159100.1,Ms10t271370.1,Ms04t078500.1,Ms10t287240.1,Ms03t065380.1,Ms04t098010.1	CKAN_00433300,CKAN_00832700,CKAN_01892700,CKAN_01588800	COCNU_HT001RO01_12T005170,COCNU_HT001RO01_04T006000,COCNU_HT001RO01_03T006330,COCNU_HT001RO01_16T000440	lm5633.a03.4.g06160_p1	LOC_Os01g59440.1,LOC_Os05g41230.1,LOC_Os01g17250.1	Glyma.14G041200.1,Glyma.02G274800.1	Zm00001e019514_T001,Zm00001e020856_T001,Zm00001e028890_T001,Zm00001e030927_T001	Zosma03g29270,Zosma06g21850,Zosma03g21960,Zosma05g19560,Zosma05g29700	GO:0023052, GO:0007178, GO:0004675	signaling, transmembrane receptor protein serine/threonine kinase signaling pathway, transmembrane receptor protein serine/threonine kinase activity
OG0000495	Wa8730a001g004560	AT3G56840.1	Ms11t316540.1	CKAN_00433100	COCNU_HT001RO01_12T005180	lm5633.a03.4.g06150_p1	LOC_Os01g59490.1	.	Zm00001e019512_T002	Zosma01g32810	GO:0071949, GO:0047545, GO:0003973	FAD binding, 2-hydroxyglutarate dehydrogenase activity, (S)-2-hydroxy-acid oxidase activity
OG0000496	Wa8730a001g004570	.	Ms02t024450.1	CKAN_00315800	COCNU_HT001RO01_04T006040	lm5633.a03.4.g06130_p1	LOC_Os01g59510.1	.	Zm00001e019511_T001	Zosma03g30040	GO:0035196, GO:0000373, GO:0004525	production of miRNAs involved in gene silencing by miRNA, Group II intron splicing, ribonuclease III activity
OG0000497	Wa8730a001g004580	AT5G21274.1,AT5G37780.1,AT3G22930.1,AT2G27030.3,AT2G41110.1,AT3G56800.1	Ms05t144190.1,Ms03t054740.1,Ms09t255770.1,Ms06t174160.1,Ms11t321280.1,Ms08t227890.1,Ms03t071420.1,Ms05t123820.1,Ms10t274530.1,Ms07t200880.1,Ms06t158360.1,Ms08t208150.1,Ms10t271380.1	CKAN_00431600,CKAN_00832500,CKAN_00315500,CKAN_00349000	COCNU_HT001RO01_12T005210,COCNU_HT001RO01_04T005940,COCNU_HT001RO01_03T005730,COCNU_HT001RO01_01T016360,COCNU_HT001RO01_05T009180,COCNU_HT001RO01_16T000060	lm5633.a03.4.g06120_p1,lm5633.a03.15.g04680_p1,lm5633.a03.11.g03670_p1,lm5633.a03.8.g07660_p1	LOC_Os11g03980.1,LOC_Os12g03816.1,LOC_Os03g20370.1,LOC_Os07g48780.1,LOC_Os01g59530.1,LOC_Os05g41210.1,LOC_Os01g16240.1	Glyma.14G040600.1,Glyma.02G002100.1,Glyma.19G121900.1,Glyma.02G275600.1,Glyma.07G232400.1,Glyma.20G048900.3,Glyma.13G074800.3,Glyma.03G004100.1,Glyma.11G020200.1,Glyma.01G223200.1,Glyma.05G213200.1	Zm00001e001501_T001,Zm00001e019509_T001,Zm00001e031996_T002,Zm00001e035910_T001,Zm00001e010998_T001,Zm00001e017290_T001,Zm00001e009213_T001,Zm00001e027331_T001,Zm00001e025525_T001	Zosma02g18430,Zosma02g24050,Zosma06g25910,Zosma04g20050,Zosma01g32830,Zosma01g42850,Zosma06g17120,Zosma05g32650	GO:0009931, GO:0005513, GO:0019722	calcium-dependent protein serine/threonine kinase activity, detection of calcium ion, calcium-mediated signaling
OG0000498	Wa8730a001g004590	AT5G05080.1	Ms01t001090.1	CKAN_00832300,CKAN_00315900	.	lm5633.a03.4.g06100_p1	.	Glyma.19G072800.1,Glyma.19G121700.1,Glyma.03G004200.1	.	Zosma02g15260,Zosma01g33440,Zosma01g42840	GO:0044257, GO:0031625, GO:0061630	cellular protein catabolic process, ubiquitin protein ligase binding, ubiquitin protein ligase activity
OG0000499	Wa8730a001g004600	AT4G20770.1,AT5G37570.1,AT1G09190.1,AT3G03580.1,AT2G03880.1,AT1G56570.1,AT4G13650.1	Ms05t139220.1,Ms03t053880.1,Ms09t244930.1,Ms09t254820.1,Ms06t173250.1,Ms02t026070.1,Ms04t087640.1,Ms06t147130.1,Ms02t024460.1,Ms10t274940.1,Ms07t196790.1,Ms11t302250.1,Ms06t158680.1,Ms01t002110.1,Ms08t230170.1,Ms04t078190.1,Ms03t065700.1,Ms04t106670.1,Ms11t307630.1	CKAN_02458000,CKAN_02332800,CKAN_00513200,CKAN_01549700,CKAN_00423200,CKAN_02153400,CKAN_00809600,CKAN_00333900,CKAN_01894000,CKAN_01746800,CKAN_01586800,CKAN_00344300,CKAN_01701100	COCNU_HT001RO01_16T003480,COCNU_HT001RO01_01T001110,COCNU_HT001RO01_12T006060,COCNU_HT001RO01_04T005480,COCNU_HT001RO01_03T006120,COCNU_HT001RO01_02T016350,COCNU_HT001RO01_01T016410,COCNU_HT001RO01_05T007220,COCNU_HT001RO01_13T002750	lm5633.a03.4.g06080_p1,lm5633.a03.11.g03120_p1	LOC_Os11g03690.1,LOC_Os12g03700.1,LOC_Os03g19980.1,LOC_Os01g59890.1,LOC_Os01g15840.1,LOC_Os09g24240.1	Glyma.03G223800.3,Glyma.20G094700.3,Glyma.05G026400.1,Glyma.11G013500.2	Zm00001e019482_T001,Zm00001e024036_T004,Zm00001e001754_T001,Zm00001e038303_T001,Zm00001e000622_T001	Zosma02g16660,Zosma03g29010,Zosma01g28670,Zosma06g25900,Zosma04g19810,Zosma01g33810,Zosma04g25260,Zosma05g20180,Zosma05g33710	GO:0003723, GO:0004519, GO:0090305	RNA binding, endonuclease activity, nucleic acid phosphodiester bond hydrolysis
OG0000500	Wa8730a001g004610	.	Ms11t316530.1	.	COCNU_HT001RO01_04T006160	lm5633.a03.4.g06070_p1	.	Glyma.14G036100.1,Glyma.02G278500.1	Zm00001e019521_T001	Zosma03g29990,Zosma06g17430	-	0
OG0000501	Wa8730a001g004620	AT3G56940.1	Ms03t071430.1,Ms10t274540.1	CKAN_00316400	.	lm5633.a03.4.g06060_p1	LOC_Os01g17170.1	Glyma.03G119500.1,Glyma.19G123800.1	Zm00001e017387_T001,Zm00001e025478_T001	Zosma01g42930	GO:0044436, GO:0009658, GO:0055114	obsolete thylakoid part, chloroplast organization, obsolete oxidation-reduction process
OG0000502	Wa8730a001g004630	AT5G05070.1,AT2G40990.1,AT3G56930.1	Ms08t214960.1,Ms02t024720.1,Ms07t200940.1,Ms11t316410.1,Ms04t093700.1,Ms11t312410.1,Ms08t224580.1,Ms11t307600.1	CKAN_00431100,CKAN_00832000,CKAN_00316500,CKAN_01743600,CKAN_01592000,CKAN_01097200	COCNU_HT001RO01_12T005280,COCNU_HT001RO01_04T005830	lm5633.a03.4.g06050_p1	LOC_Os11g03910.1,LOC_Os01g70100.1,LOC_Os12g03730.1,LOC_Os01g17160.1	Glyma.03G119700.1,Glyma.19G123900.1,Glyma.02G064800.1	Zm00001e028412_T001,Zm00001e017389_T001,Zm00001e020850_T001,Zm00001e018789_T002	Zosma03g30060,Zosma02g03680,Zosma06g21910,Zosma01g42950	GO:0022622, GO:0035618, GO:0071944	root system development, root hair, cell periphery
OG0000503	Wa8730a001g004640	AT3G22670.1,AT2G26790.1,AT1G13040.1	Ms06t172870.1,Ms02t026240.1,Ms07t196800.1,Ms11t303510.1,Ms08t230300.1,Ms08t220840.1,Ms04t097940.1	CKAN_00428300,CKAN_00314400,CKAN_01586600,CKAN_01700400	COCNU_HT001RO01_01T001340,COCNU_HT001RO01_02T016600,COCNU_HT001RO01_05T007330,COCNU_HT001RO01_13T003910	lm5633.a03.4.g06620_p1,lm5633.a03.15.g05030_p1	LOC_Os03g24880.1	Glyma.14G034400.1,Glyma.02G280200.3,Glyma.07G218100.1,Glyma.17G099400.1,Glyma.11G013700.1	Zm00001e017320_T001	Zosma02g17100,Zosma03g28240,Zosma06g21500,Zosma01g42400	GO:0003723, GO:0090305, GO:0009451	RNA binding, nucleic acid phosphodiester bond hydrolysis, RNA modification
OG0000504	Wa8730a001g004650	AT3G10740.1	Ms05t144210.1,Ms08t230020.1	CKAN_00830000,CKAN_00317400	COCNU_HT001RO01_12T005280	lm5633.a03.4.g06630_p1,lm5633.a03.11.g03720_p1	LOC_Os11g03730.1,LOC_Os12g03470.3,LOC_Os03g20420.1,LOC_Os07g48750.1	Glyma.03G120000.2,Glyma.19G124500.1,Glyma.03G003900.1	Zm00001e001505_T005,Zm00001e024060_T005,Zm00001e011000_T001,Zm00001e020852_T001	Zosma01g32860	GO:0048046, GO:0009044, GO:0009505	apoplast, xylan 1,4-beta-xylosidase activity, plant-type cell wall
OG0000505	Wa8730a001g004660	AT2G26730.1	Ms05t141030.1,Ms03t054770.1,Ms09t255800.1,Ms06t171520.1,Ms08t227820.1,Ms04t087060.1,Ms07t198670.1,Ms08t229600.1,Ms04t107260.1	CKAN_01289400,CKAN_01905000,CKAN_01095700	COCNU_HT001RO01_05T009430,COCNU_HT001RO01_13T003690	lm5633.a03.4.g06660_p1,lm5633.a03.15.g04280_p1	LOC_Os11g03820.1,LOC_Os12g03640.1,LOC_Os01g16230.1	Glyma.02G162300.1,Glyma.04G093200.1	Zm00001e017291_T001,Zm00001e025526_T001	Zosma03g29390,Zosma02g04650,Zosma01g32390,Zosma01g42830	GO:0023052, GO:0004675, GO:0007178	signaling, transmembrane receptor protein serine/threonine kinase activity, transmembrane receptor protein serine/threonine kinase signaling pathway
OG0000506	Wa8730a001g004670	.	.	.	.	.	.	.	.	Zosma04g24840	-	0
OG0000507	Wa8730a001g004680	.	Ms08t230010.1	CKAN_00430600	.	lm5633.a03.4.g06690_p1	LOC_Os01g59080.1	.	Zm00001e019533_T001	Zosma02g16690	-	0
OG0000508	Wa8730a001g004690	AT4G20940.1,AT3G03650.1	Ms05t138580.1,Ms03t054380.1,Ms09t255590.1,Ms08t228130.1,Ms02t025860.1,Ms04t087420.1,Ms06t147040.1,Ms07t201190.1,Ms06t157980.1,Ms10t271110.1,Ms10t296480.1,Ms10t287160.1,Ms04t107260.1,Ms10t281440.1,Ms05t127860.1	CKAN_00430900,CKAN_00828900,CKAN_00321300,CKAN_01891000,CKAN_00923100,CKAN_01446900,CKAN_01591900,CKAN_01095700	COCNU_HT001RO01_12T005290,COCNU_HT001RO01_04T005400,COCNU_HT001RO01_03T006130,COCNU_HT001RO01_05T008510	lm5633.a03.4.g06730_p1	LOC_Os11g03410.1,LOC_Os01g70200.1,LOC_Os12g03100.1,LOC_Os03g20850.1,LOC_Os07g48730.1,LOC_Os01g59630.1,LOC_Os03g24930.1,LOC_Os08g34020.1,LOC_Os06g46330.1	Glyma.14G040000.1,Glyma.20G048300.2,Glyma.13G073900.1,Glyma.05G028300.1	Zm00001e039243_T001,Zm00001e019502_T001,Zm00001e028403_T001,Zm00001e035913_T001,Zm00001e017368_T001,Zm00001e001757_T001,Zm00001e018772_T001,Zm00001e028932_T002	Zosma02g20010,Zosma02g24500,Zosma03g28710,Zosma06g26220,Zosma02g03150,Zosma06g21490,Zosma04g19730,Zosma01g33630,Zosma01g42570,Zosma05g19480,Zosma05g26090	GO:0010398, GO:0007178, GO:0004675	xylogalacturonan metabolic process, transmembrane receptor protein serine/threonine kinase signaling pathway, transmembrane receptor protein serine/threonine kinase activity
OG0000509	Wa8730a001g004700	.	Ms01t001580.1	.	.	.	.	.	.	.	GO:0017096, GO:0030744, GO:0047763	acetylserotonin O-methyltransferase activity, luteolin O-methyltransferase activity, caffeate O-methyltransferase activity
OG0000510	Wa8730a001g004710	AT2G26960.1,AT1G56650.1,AT4G13480.1,AT4G26930.1	Ms03t054860.1,Ms07t200950.1,Ms11t302490.1,Ms08t221030.1,Ms10t296590.1,Ms10t287430.1,Ms04t107020.1	CKAN_01280600,CKAN_00430000,CKAN_00830100,CKAN_00318100,CKAN_01746100	COCNU_HT001RO01_02T007160,COCNU_HT001RO01_04T005980,COCNU_HT001RO01_13T003090	.	LOC_Os01g59660.2,LOC_Os05g41166.1,LOC_Os06g46560.1	Glyma.14G039200.2,Glyma.19G061600.1,Glyma.05G006100.1	Zm00001e018784_T002,Zm00001e012497_T001	Zosma02g18260,Zosma03g30130,Zosma01g42010,Zosma06g17610,Zosma01g04900,Zosma05g20970,Zosma05g25950	GO:0048658, GO:0009740, GO:0006357	anther wall tapetum development, gibberellic acid mediated signaling pathway, regulation of transcription by RNA polymerase II
OG0000511	Wa8730a001g004720	AT2G41000.1	Ms10t271420.1	CKAN_00428900	.	lm5633.a03.4.g06850_p1	LOC_Os01g17040.1	Glyma.19G064700.1	.	Zosma03g30200	-	0
OG0000512	Wa8730a001g004730	.	Ms06t174320.1,Ms07t200980.1,Ms06t158340.1,Ms10t296560.1,Ms03t064990.1,Ms10t281450.1	.	COCNU_HT001RO01_12T005370,COCNU_HT001RO01_01T016070	lm5633.a03.4.g06840_p1,lm5633.a03.11.g03220_p1	LOC_Os03g20500.1,LOC_Os01g59690.1,LOC_Os05g41130.1	.	Zm00001e019495_T001,Zm00001e031989_T001,Zm00001e027323_T001	Zosma01g32910,Zosma01g42760,Zosma05g29710	GO:0052717, -, GO:0052718	tRNA-specific adenosine-34 deaminase activity, 0, tRNA-specific adenosine-34 deaminase complex
OG0000513	Wa8730a001g004740	.	Ms09t244370.1,Ms11t302510.1,Ms05t127720.1	CKAN_00429000	COCNU_HT001RO01_16T000010	lm5633.a03.4.g06830_p1	LOC_Os03g20470.1	Glyma.19G064800.3	Zm00001e001508_T001	Zosma03g30190	GO:0019904, GO:0020037, GO:0048037	protein domain specific binding, heme binding, obsolete cofactor binding
OG0000514	Wa8730a001g004750	AT2G27080.2	Ms11t309960.1,Ms06t146910.1	CKAN_00429100	.	lm5633.a03.4.g06800_p1	LOC_Os01g59680.1	Glyma.04G103700.1	Zm00001e039222_T001,Zm00001e019498_T001	Zosma02g24080	GO:0009506, GO:0042742, GO:0055044	plasmodesma, defense response to bacterium, symplast
OG0000515	Wa8730a001g004760	.	Ms09t255880.1	.	.	.	.	Glyma.19G064500.2	.	Zosma02g24070	GO:0042868, GO:0006369, GO:0006379	antisense RNA metabolic process, termination of RNA polymerase II transcription, mRNA cleavage
OG0000516	Wa8730a001g004770	AT5G21090.1,AT3G28890.1,AT5G37790.1,AT1G08590.1,AT3G13380.1,AT3G22800.1,AT2G27060.1	Ms05t141090.1,Ms03t054970.1,Ms09t244030.1,Ms09t254120.1,Ms06t174680.1,Ms02t045270.1,Ms11t309820.1,Ms10t274220.1,Ms07t201330.1,Ms05t132970.1,Ms06t157980.1,Ms11t316350.1,Ms10t271700.1,Ms04t078500.1,Ms10t287250.1,Ms03t065320.1,Ms04t107400.1,Ms10t281850.1,Ms04t098120.1,Ms03t068040.1	CKAN_02334000,CKAN_02153600,CKAN_00822300,CKAN_00318400,CKAN_01447700,CKAN_01583900	COCNU_HT001RO01_02T007670,COCNU_HT001RO01_12T006210,COCNU_HT001RO01_04T005130,COCNU_HT001RO01_03T006320,COCNU_HT001RO01_05T008510	lm5633.a03.2.g04830_p1,lm5633.a03.4.g06780_p1	LOC_Os03g20450.1	Glyma.14G041600.1,Glyma.19G063800.1,Glyma.02G274500.1,Glyma.07G219802.1,Glyma.18G257800.1,Glyma.09G240700.2,Glyma.03G003300.1,Glyma.06G237200.1	Zm00001e019514_T001,Zm00001e004071_T001,Zm00001e038281_T002,Zm00001e028890_T001	Zosma02g16840,Zosma03g29840,Zosma06g26010,Zosma06g20800,Zosma04g19590,Zosma01g32880,Zosma01g42800,Zosma03g21960,Zosma05g19560,Zosma05g31540,Zosma05g29700,Zosma05g04460	GO:2000605, GO:0004675, GO:0007178	positive regulation of secondary growth, transmembrane receptor protein serine/threonine kinase activity, transmembrane receptor protein serine/threonine kinase signaling pathway
OG0000517	Wa8730a001g004780	AT5G04990.1,AT3G10730.1	Ms09t255860.1,Ms06t146890.1,Ms10t271410.1	CKAN_00429500,CKAN_00831200,CKAN_00318300	COCNU_HT001RO01_12T005340	lm5633.a03.4.g06760_p1	LOC_Os01g16220.1	Glyma.15G223100.2	Zm00001e017295_T001	Zosma02g15700,Zosma06g30720	GO:0015630, GO:0000003, GO:0009524	microtubule cytoskeleton, reproduction, phragmoplast
OG0000518	Wa8730a001g004790	.	Ms10t281460.1	CKAN_00424600	COCNU_HT001RO01_16T000110	lm5633.a03.4.g06880_p1	.	Glyma.03G131100.6,Glyma.19G133100.1	.	Zosma02g24110	GO:0008270, GO:0101016, GO:0009247	zinc ion binding, FMN-binding domain binding, glycolipid biosynthetic process
OG0000519	Wa8730a001g004800	AT2G41120.1	.	.	.	.	LOC_Os11g03580.1,LOC_Os12g03350.1	Glyma.03G119000.1,Glyma.19G123400.1	Zm00001e024047_T001	Zosma02g03170	-	0
OG0000520	Wa8730a001g004810	AT5G21140.1	Ms07t200990.1	CKAN_00428200	COCNU_HT001RO01_04T005720	lm5633.a03.4.g06870_p1	LOC_Os11g03590.1,LOC_Os12g03360.1	Glyma.20G050900.7	Zm00001e039223_T002	Zosma03g30230	-	0
OG0000521	Wa8730a001g004820	AT2G41050.1	Ms06t174350.1,Ms10t274570.1	CKAN_00428700	COCNU_HT001RO01_01T015910	.	LOC_Os01g16170.1	Glyma.03G119200.2,Glyma.19G123451.1	Zm00001e017302_T002,Zm00001e025533_T001	Zosma03g29210,Zosma01g42690	-	0
OG0000523	Wa8730a001g004830	AT2G27090.1	Ms09t244360.1,Ms06t174330.1,Ms02t044900.1,Ms11t309950.1,Ms10t274560.1	CKAN_00829800,CKAN_00319000,CKAN_01897800	COCNU_HT001RO01_03T006710,COCNU_HT001RO01_13T002830,COCNU_HT001RO01_16T000140	lm5633.a03.4.g06860_p1	LOC_Os03g20530.1,LOC_Os07g48690.1	Glyma.14G041800.5,Glyma.02G274300.1,Glyma.20G051100.8,Glyma.13G076600.1	Zm00001e001511_T001,Zm00001e021207_T001	Zosma02g24090,Zosma03g30220,Zosma01g42730,Zosma05g31290	-	0
OG0000524	Wa8730a001g004840	AT1G13370.1	Ms08t215100.1	CKAN_01288300,CKAN_01902200	COCNU_HT001RO01_02T007130,COCNU_HT001RO01_12T005410	lm5633.a03.4.g06890_p1	LOC_Os05g41080.1	.	Zm00001e031985_T004	.	GO:0031492, GO:0034508, GO:0009567	nucleosomal DNA binding, centromere complex assembly, double fertilization forming a zygote and endosperm
OG0000525	Wa8730a001g004850	.	Ms04t093940.1	CKAN_00325800	COCNU_HT001RO01_12T005420	.	.	Glyma.19G121200.1,Glyma.20G053500.7	.	Zosma04g25080	GO:0055044, -, GO:0009506	symplast, 0, plasmodesma
OG0000526	Wa8730a001g004860	AT4G11370.1	Ms05t140940.1,Ms09t244340.1,Ms06t174360.1,Ms07t196390.1,Ms01t001590.1	CKAN_01547900,CKAN_00825000,CKAN_01449600	COCNU_HT001RO01_04T005630,COCNU_HT001RO01_03T005470	lm5633.a03.4.g06990_p1	LOC_Os07g48680.1,LOC_Os01g16120.1,LOC_Os01g11490.1,LOC_Os02g45780.1	Glyma.08G233400.1	Zm00001e011004_T001	Zosma02g20260,Zosma02g03230,Zosma01g32920	GO:0047484, GO:1905959, GO:0061630	regulation of response to osmotic stress, positive regulation of cellular response to alcohol, ubiquitin protein ligase activity
OG0000527	Wa8730a001g004870	.	Ms05t140940.1,Ms09t244340.1,Ms06t174360.1,Ms10t288400.1	CKAN_01547900,CKAN_00825000,CKAN_01449600	.	lm5633.a03.4.g06980_p1	LOC_Os07g48680.1,LOC_Os01g16120.1,LOC_Os01g11490.1,LOC_Os02g45710.1	Glyma.08G233400.1	Zm00001e011004_T001,Zm00001e016470_T001	Zosma02g20260,Zosma02g03230,Zosma01g32920	GO:0047484, GO:1905959, GO:0061630	regulation of response to osmotic stress, positive regulation of cellular response to alcohol, ubiquitin protein ligase activity
OG0000528	Wa8730a001g004880	AT3G56850.1	Ms05t141350.1,Ms08t227790.1,Ms02t024500.1,Ms06t158320.1,Ms10t271440.1,Ms11t312480.1	CKAN_00420500,CKAN_00324900,CKAN_01893700	COCNU_HT001RO01_12T005480,COCNU_HT001RO01_04T005620,COCNU_HT001RO01_03T006400,COCNU_HT001RO01_01T017150	lm5633.a03.4.g06970_p1	LOC_Os03g20650.1,LOC_Os07g48660.1,LOC_Os01g59760.1,LOC_Os05g41070.1	Glyma.08G227000.6,Glyma.19G122800.1,Glyma.03G003400.1,Glyma.15G222400.1	Zm00001e019490_T001,Zm00001e035915_T001,Zm00001e027321_T001	Zosma02g18130,Zosma02g24160,Zosma01g32940	GO:0009738, GO:0071215, GO:0023052	abscisic acid-activated signaling pathway, cellular response to abscisic acid stimulus, signaling
OG0000529	Wa8730a001g004890	AT5G21150.1,AT2G27040.1,AT2G32940.1	Ms09t244330.1,Ms07t196900.1	CKAN_00421500,CKAN_00471700	COCNU_HT001RO01_01T016170	lm5633.a03.4.g06960_p1	LOC_Os01g16870.1	Glyma.14G041100.1,Glyma.02G274900.1,Glyma.20G052500.2	Zm00001e017367_T001,Zm00001e009253_T001,Zm00001e025496_T001	Zosma02g18940,Zosma01g32950,Zosma01g42710,Zosma05g29820	GO:0006306, GO:0016246, GO:0035198	DNA methylation, RNA interference, miRNA binding
OG0000530	Wa8730a001g004900	AT3G54320.3,AT3G20840.1	Ms05t142300.1,Ms03t054820.1,Ms08t215110.1,Ms11t312640.1	CKAN_00825400,CKAN_00324500,CKAN_00921900	COCNU_HT001RO01_12T005490,COCNU_HT001RO01_04T005580,COCNU_HT001RO01_05T006960,COCNU_HT001RO01_13T002260	lm5633.a03.2.g04550_p1,lm5633.a03.4.g05010_p1	LOC_Os11g03540.1,LOC_Os12g03290.1,LOC_Os01g59780.1	Glyma.08G227700.2,Glyma.18G256000.1,Glyma.09G240400.1,Glyma.15G221600.5	Zm00001e019489_T001,Zm00001e004083_T002,Zm00001e024044_T002,Zm00001e009225_T003	Zosma03g30270,Zosma06g17550	GO:0006110, GO:2001169, GO:0019432	regulation of glycolytic process, regulation of ATP biosynthetic process, triglyceride biosynthetic process
OG0000531	Wa8730a001g004910	.	.	CKAN_01279700	COCNU_HT001RO01_04T005560	lm5633.a03.4.g05010_p1	LOC_Os11g03520.1	Glyma.02G273900.1,Glyma.01G226300.1	Zm00001e024041_T001	Zosma02g18950,Zosma06g25180,Zosma03g32600,Zosma04g24670	GO:0030811, GO:2001169, GO:0006110	regulation of nucleotide catabolic process, regulation of ATP biosynthetic process, regulation of glycolytic process
OG0000532	Wa8730a001g004920	AT5G38030.1,AT3G03620.1,AT1G12950.1,AT5G17700.1,AT1G47530.1,AT1G23300.1	Ms07t201010.1,Ms04t107080.1,Ms08t224060.1,Ms03t067870.1	CKAN_01289300,CKAN_00827100,CKAN_00323300,CKAN_01904000,CKAN_01095600	COCNU_HT001RO01_12T005500,COCNU_HT001RO01_04T005550,COCNU_HT001RO01_03T007230	lm5633.a03.4.g05050_p1	LOC_Os11g03240.1,LOC_Os12g03260.1,LOC_Os03g08900.1	Glyma.19G120900.2,Glyma.03G005300.2,Glyma.04G097900.1	Zm00001e039229_T001,Zm00001e009226_T001,Zm00001e012499_T001,Zm00001e000652_T001	Zosma06g20610,Zosma03g32390,Zosma01g42510,Zosma05g04250	GO:0006855, GO:0015238, GO:0022857	drug transmembrane transport, xenobiotic transmembrane transporter activity, transmembrane transporter activity
OG0000533	Wa8730a001g004930	AT3G10690.1	Ms05t138790.1	.	COCNU_HT001RO01_04T005540	lm5633.a03.4.g05090_p1	.	.	.	Zosma01g32960	GO:0044451, GO:0016592, GO:0009295	obsolete nucleoplasm part, mediator complex, nucleoid
OG0000534	Wa8730a001g004940	AT5G21060.1	Ms08t215130.1	CKAN_00322700	COCNU_HT001RO01_12T005570	.	LOC_Os11g03470.3,LOC_Os12g03190.1	Glyma.20G053200.1	Zm00001e039231_T002	Zosma01g42590	-	0
OG0000535	Wa8730a001g004950	.	.	.	.	lm5633.a03.4.g05100_p1	.	.	.	.	GO:0010876, GO:0042335, GO:0006869	lipid localization, cuticle development, lipid transport
OG0000536	Wa8730a001g004960	.	.	.	COCNU_HT001RO01_12T005340	.	.	.	.	.	GO:0090435, GO:0044821, GO:0070197	protein localization to nuclear envelope, meiotic telomere tethering at nuclear periphery, meiotic attachment of telomere to nuclear envelope
OG0000537	Wa8730a001g004970	.	Ms02t044870.1,Ms10t287300.1	.	COCNU_HT001RO01_02T007320,COCNU_HT001RO01_03T006590	lm5633.a03.4.g05110_p1	LOC_Os03g09230.1	.	.	.	GO:0044425, GO:0046658, GO:0044459	obsolete membrane part, anchored component of plasma membrane, obsolete plasma membrane part
OG0000538	Wa8730a001g004980	AT5G21120.1,AT2G27050.1,AT3G20770.1	Ms05t144270.1,Ms03t054850.1,Ms09t255950.1,Ms06t174420.1,Ms11t321270.1,Ms08t227780.1,Ms07t201030.1,Ms06t158310.1,Ms08t221290.1,Ms10t281510.1	CKAN_01285500,CKAN_00828000,CKAN_00322000,CKAN_01897100	COCNU_HT001RO01_12T005600,COCNU_HT001RO01_04T005510,COCNU_HT001RO01_01T015750	lm5633.a03.4.g05130_p1	LOC_Os03g20780.1,LOC_Os07g48630.2,LOC_Os07g12210.1	Glyma.14G041500.1,Glyma.02G274600.1,Glyma.20G051500.1,Glyma.13G076700.1	Zm00001e001522_T002,Zm00001e035899_T001,Zm00001e010992_T001,Zm00001e038277_T001	Zosma02g24210,Zosma03g28910,Zosma01g42670,Zosma05g21350	GO:0001666, GO:0010182, GO:0000976	response to hypoxia, sugar mediated signaling pathway, transcription regulatory region sequence-specific DNA binding
OG0000539	Wa8730a001g004990	.	.	.	.	.	.	.	.	.
OG0000540	Wa8730a001g005000	.	Ms05t123700.1	.	COCNU_HT001RO01_16T005390	.	.	Glyma.06G239100.1	Zm00001e035895_T001	Zosma01g28700	GO:0044615, GO:0010070, GO:0044613	nuclear pore nuclear basket, zygote asymmetric cell division, nuclear pore central transport channel
OG0000541	Wa8730a001g005010	AT4G20350.2	Ms09t255990.1,Ms11t321610.1,Ms05t123700.1	CKAN_00418000	COCNU_HT001RO01_16T005380	lm5633.a03.4.g04940_p1	LOC_Os07g48602.1	Glyma.06G239100.1	Zm00001e035895_T001	Zosma01g28700,Zosma04g25130	GO:0044615, GO:0010070, GO:0044613	nuclear pore nuclear basket, zygote asymmetric cell division, nuclear pore central transport channel
OG0000542	Wa8730a001g005020	AT3G03650.1	Ms05t138580.1,Ms09t257490.1,Ms04t087420.1,Ms06t146970.1,Ms07t201080.1	CKAN_00518200,CKAN_00427300,CKAN_00828900,CKAN_00321300	COCNU_HT001RO01_12T005670,COCNU_HT001RO01_04T005410,COCNU_HT001RO01_01T015680,COCNU_HT001RO01_05T007210	lm5633.a03.4.g04980_p1	LOC_Os11g03410.1,LOC_Os12g03100.1,LOC_Os03g20850.1,LOC_Os01g59630.1,LOC_Os08g34020.1,LOC_Os06g46690.1	Glyma.04G169500.1,Glyma.19G119100.1,Glyma.06G193900.2,Glyma.01G057900.1,Glyma.03G006800.1,Glyma.17G100100.1,Glyma.05G026801.1	Zm00001e001524_T001,Zm00001e039243_T001,Zm00001e004110_T001,Zm00001e038276_T006,Zm00001e020864_T001	Zosma02g24500,Zosma03g28800,Zosma02g03150,Zosma01g33010	GO:0045489, GO:0035252, GO:0010398	pectin biosynthetic process, UDP-xylosyltransferase activity, xylogalacturonan metabolic process
OG0000543	Wa8730a001g005030	AT3G28917.1	Ms08t215120.1,Ms06t172880.1,Ms07t198680.1,Ms10t271010.1,Ms04t093600.1,Ms10t288680.1	CKAN_01280500,CKAN_00427100,CKAN_00321400,CKAN_01904900,CKAN_00349100,CKAN_01705800	COCNU_HT001RO01_12T005650,COCNU_HT001RO01_04T005420,COCNU_HT001RO01_05T007250,COCNU_HT001RO01_13T003650	lm5633.a03.4.g05200_p1	LOC_Os11g03420.1,LOC_Os08g34010.1,LOC_Os09g24810.1	Glyma.04G169900.1,Glyma.18G257300.1,Glyma.17G100000.1,Glyma.19G022200.1,Glyma.05G026900.1,Glyma.13G063100.1	Zm00001e004112_T001	Zosma02g19320,Zosma01g28690,Zosma02g04200	GO:0009739, GO:0010582, GO:0035670	response to gibberellin, floral meristem determinacy, plant-type ovary development
OG0000544	Wa8730a001g005040	.	Ms05t138500.1	.	COCNU_HT001RO01_04T005420	lm5633.a03.4.g04990_p1	LOC_Os11g03430.1,LOC_Os12g03130.1	.	Zm00001e039236_T001	Zosma03g30420	GO:0043138, GO:0031938, GO:0044454	3'-5' DNA helicase activity, regulation of chromatin silencing at telomere, obsolete nuclear chromosome part
OG0000546	Wa8730a001g005050	AT3G28910.1,AT1G08810.1,AT5G35550.1,AT3G12820.1	Ms03t054860.1,Ms09t255980.1,Ms02t044780.1,Ms11t309870.1,Ms05t123720.1,Ms07t200450.1,Ms05t132830.1,Ms08t207930.1,Ms10t271450.1,Ms04t078370.1,Ms10t296520.1,Ms10t287430.1,Ms08t224280.1	CKAN_01280600,CKAN_00427000,CKAN_00828200,CKAN_00321800,CKAN_00354400,CKAN_00691600	COCNU_HT001RO01_02T007560,COCNU_HT001RO01_04T005430,COCNU_HT001RO01_03T005840,COCNU_HT001RO01_01T015700,COCNU_HT001RO01_05T007260,COCNU_HT001RO01_13T003090	lm5633.a03.4.g05000_p1	LOC_Os11g03440.1,LOC_Os12g03150.1,LOC_Os08g33940.1,LOC_Os09g24800.1,LOC_Os07g43580.1,LOC_Os01g74590.1	Glyma.04G170100.1,Glyma.02G110000.1,Glyma.19G119300.1,Glyma.06G193600.1,Glyma.01G051700.1,Glyma.18G259100.1,Glyma.09G238800.1,Glyma.03G006600.1,Glyma.17G099800.1,Glyma.19G022100.1,Glyma.05G027000.1,Glyma.13G063200.1	Zm00001e039235_T001,Zm00001e004115_T001,Zm00001e024037_T001	Zosma02g18260,Zosma03g30130,Zosma06g25040,Zosma02g04530,Zosma01g04900,Zosma05g20970	GO:0043565, GO:0001135, GO:0001134	sequence-specific DNA binding, obsolete RNA polymerase II transcription regulator recruiting activity, obsolete transcription regulator recruiting activity
OG0000548	Wa8730a001g005060	AT1G08710.1	Ms04t087410.1	.	COCNU_HT001RO01_04T005450	.	LOC_Os01g59910.1	Glyma.19G119400.2	Zm00001e019480_T002	Zosma02g24230	-	0
OG0000549	Wa8730a001g005070	AT3G13420.1	Ms04t087430.1	CKAN_00418200,CKAN_00823700	COCNU_HT001RO01_04T011670,COCNU_HT001RO01_04T005380	lm5633.a03.4.g04930_p1	LOC_Os07g12220.1	Glyma.07G225000.1	Zm00001e033129_T001	Zosma06g25490	-	0
OG0000550	Wa8730a001g005080	AT5G56360.1	Ms05t144290.1,Ms10t274650.1	CKAN_00418500,CKAN_00327900	COCNU_HT001RO01_16T005350,COCNU_HT001RO01_04T011720	.	LOC_Os01g16970.3	Glyma.07G224600.1	Zm00001e017380_T001,Zm00001e025482_T002	Zosma02g24290	GO:0051704, GO:0042742, GO:0005783	multi-organism process, defense response to bacterium, endoplasmic reticulum
OG0000551	Wa8730a001g005090	AT5G39660.2,AT1G47655.1	Ms02t044770.1,Ms11t312460.1,Ms10t287040.1,Ms11t307080.1	CKAN_01279200,CKAN_00420100,CKAN_00327600,CKAN_00690300	COCNU_HT001RO01_16T005310,COCNU_HT001RO01_04T011770,COCNU_HT001RO01_12T005850,COCNU_HT001RO01_04T005310,COCNU_HT001RO01_03T005750,COCNU_HT001RO01_05T007530,COCNU_HT001RO01_13T002150	lm5633.a03.4.g04910_p1,lm5633.a03.15.g04510_p1	LOC_Os07g48570.1,LOC_Os01g15900.1,LOC_Os03g07360.1	Glyma.04G168300.1,Glyma.08G228900.1,Glyma.06G194800.1,Glyma.07G229600.2,Glyma.01G049400.1,Glyma.18G260500.1,Glyma.09G237000.1,Glyma.20G035200.1,Glyma.03G007950.1,Glyma.17G101000.1,Glyma.15G215500.1,Glyma.19G023200.1,Glyma.05G025900.1,Glyma.13G062500.1	Zm00001e035892_T001,Zm00001e017319_T001,Zm00001e012437_T001	Zosma02g21140,Zosma03g28670,Zosma06g24790,Zosma01g33060,Zosma01g05000	GO:0048579, GO:0048577, GO:0003700	negative regulation of long-day photoperiodism, flowering, negative regulation of short-day photoperiodism, flowering, DNA-binding transcription factor activity
OG0000553	Wa8730a001g005100	AT5G04930.1	Ms05t144340.1,Ms03t054880.1,Ms09t244200.1,Ms09t256250.1,Ms06t174460.1,Ms08t227740.1,Ms05t123660.1,Ms10t271460.1,Ms10t288530.1	CKAN_00419900	COCNU_HT001RO01_16T005640,COCNU_HT001RO01_04T011790	lm5633.a03.2.g04750_p1,lm5633.a03.4.g04870_p1	LOC_Os03g20949.1,LOC_Os01g17010.1	Glyma.04G166100.1,Glyma.08G228800.1,Glyma.18G213100.5,Glyma.06G196400.7,Glyma.15G215400.2,Glyma.16G220100.2	Zm00001e001531_T001,Zm00001e017383_T002,Zm00001e038245_T001	Zosma01g28710,Zosma06g24480	GO:0045332, GO:0004012, GO:0005548	phospholipid translocation, ATPase-coupled intramembrane lipid transporter activity, phospholipid transporter activity
OG0000554	Wa8730a001g005110	AT3G29035.1,AT5G39610.1,AT3G04060.1,AT3G12977.1,AT2G33480.1,AT5G18270.2,AT3G15170.1	Ms03t054920.1,Ms09t244160.1,Ms09t256090.1,Ms06t174510.1,Ms08t227700.1,Ms05t123620.1,Ms02t024170.1,Ms10t274680.1,Ms07t197950.1,Ms05t132140.1,Ms06t159860.1,Ms08t230690.1,Ms10t288150.1,Ms03t064910.1,Ms08t223770.1,Ms11t306940.1	CKAN_00414700,CKAN_00823000,CKAN_00329100,CKAN_01928200,CKAN_00924200,CKAN_01094600	COCNU_HT001RO01_16T005210,COCNU_HT001RO01_04T011930,COCNU_HT001RO01_12T005790,COCNU_HT001RO01_04T005200,COCNU_HT001RO01_05T007700	lm5633.a03.4.g04720_p1,lm5633.a03.11.g03030_p1	LOC_Os11g03370.1,LOC_Os12g03050.1,LOC_Os03g21030.1,LOC_Os07g48550.1,LOC_Os08g33670.1	Glyma.04G167200.1,Glyma.02G109800.1,Glyma.06G195500.1,Glyma.07G229100.1,Glyma.01G051300.1,Glyma.20G033300.1,Glyma.17G101500.1,Glyma.05G025500.1,Glyma.02G070600.1	Zm00001e001536_T001,Zm00001e004117_T001,Zm00001e035884_T001,Zm00001e024028_T001,Zm00001e038267_T001,Zm00001e009234_T001,Zm00001e025621_T001,Zm00001e012429_T001,Zm00001e029404_T001	Zosma02g18190,Zosma03g30370,Zosma01g28780,Zosma02g03250,Zosma01g33050,Zosma01g09650,Zosma01g41580,Zosma04g24980,Zosma06g17250,Zosma01g04850,Zosma05g31440	GO:1900057, GO:0051194, GO:0003700	positive regulation of leaf senescence, obsolete positive regulation of cofactor metabolic process, DNA-binding transcription factor activity
OG0000555	Wa8730a001g005120	AT1G08570.1,AT2G33270.1	Ms09t244170.1,Ms06t174500.1,Ms08t227710.1,Ms05t123630.1,Ms10t287000.1	CKAN_00414900,CKAN_00329000	COCNU_HT001RO01_16T005220,COCNU_HT001RO01_04T011890,COCNU_HT001RO01_02T007770	lm5633.a03.4.g04750_p1	LOC_Os03g21000.1,LOC_Os07g48510.1,LOC_Os03g07226.1	Glyma.04G167500.1,Glyma.06G195100.1	Zm00001e001534_T002,Zm00001e035885_T001,Zm00001e038268_T001	Zosma02g18200	GO:0031969, GO:0016671, GO:0009507	chloroplast membrane, oxidoreductase activity, acting on a sulfur group of donors, disulfide as acceptor, chloroplast
OG0000557	Wa8730a001g005130	.	Ms10t281570.1	CKAN_00414500	COCNU_HT001RO01_04T011980	lm5633.a03.4.g04690_p1	LOC_Os03g21080.1	Glyma.15G212800.1	Zm00001e001542_T004,Zm00001e038257_T006	Zosma01g28800	GO:0005088, GO:0031267, GO:0008064	guanyl-nucleotide exchange factor activity, small GTPase binding, regulation of actin polymerization or depolymerization
OG0000558	Wa8730a001g005140	AT3G54340.1	Ms09t253690.1,Ms08t214990.1,Ms02t024830.1,Ms10t286860.1	CKAN_01290200	.	lm5633.a03.15.g04000_p1,lm5633.a03.8.g09720_p1	LOC_Os01g74440.1,LOC_Os03g08754.1	.	Zm00001e000638_T002	.	GO:0009908, GO:0000900, GO:0003700	flower development, translation repressor activity, mRNA regulatory element binding, DNA-binding transcription factor activity
OG0000559	Wa8730a001g005150	AT3G29020.2,AT5G39700.1,AT5G17800.1	Ms05t144350.1,Ms03t054890.1,Ms09t244190.1,Ms09t256030.1,Ms06t174470.1,Ms11t321250.1,Ms10t274670.1,Ms07t198000.1,Ms06t158280.1,Ms03t065530.1,Ms10t281540.1,Ms11t307090.1	CKAN_00419500,CKAN_00824400,CKAN_00326400,CKAN_01929000,CKAN_00351100	COCNU_HT001RO01_16T005280,COCNU_HT001RO01_04T011830,COCNU_HT001RO01_02T007630,COCNU_HT001RO01_12T005830,COCNU_HT001RO01_04T005280,COCNU_HT001RO01_03T005700,COCNU_HT001RO01_05T007560,COCNU_HT001RO01_13T001160	.	LOC_Os01g16810.1,LOC_Os08g33800.1,LOC_Os07g43420.1,LOC_Os01g74590.1	Glyma.02G108800.1,Glyma.19G118500.1,Glyma.07G228700.1,Glyma.01G049600.1,Glyma.20G034100.1,Glyma.03G007500.1	Zm00001e004128_T003,Zm00001e017365_T001,Zm00001e021349_T001,Zm00001e018391_T001	Zosma02g24300,Zosma03g30400,Zosma01g28750,Zosma06g25530,Zosma02g04530,Zosma04g19620,Zosma01g42010,Zosma06g17210	GO:0035670, GO:0080050, GO:0048579	plant-type ovary development, regulation of seed development, negative regulation of long-day photoperiodism, flowering
OG0000560	Wa8730a001g005160	.	Ms02t024520.1	CKAN_00326600	COCNU_HT001RO01_04T005290	.	LOC_Os11g03390.1,LOC_Os12g03070.2	Glyma.20G058100.1	Zm00001e020868_T001	Zosma06g25520	GO:0044424, GO:0003729, GO:0005634	obsolete intracellular part, mRNA binding, nucleus
OG0000561	Wa8730a001g005170	AT4G20780.1,AT2G41100.1	Ms10t287030.1	CKAN_00419600,CKAN_00690200	COCNU_HT001RO01_12T005840,COCNU_HT001RO01_04T005300,COCNU_HT001RO01_05T007540	lm5633.a03.4.g04850_p1	LOC_Os11g04770.1,LOC_Os12g04580.1,LOC_Os09g24580.1	.	Zm00001e021222_T001	Zosma02g18430	GO:0009652, GO:0005509, GO:2000082	thigmotropism, calcium ion binding, regulation of L-ascorbic acid biosynthetic process
OG0000562	Wa8730a001g005180	AT5G04780.1,AT3G29230.1,AT3G12770.1,AT1G13410.1,AT1G56690.1,AT5G56310.1	Ms05t143170.1,Ms09t256050.1,Ms06t172610.1,Ms04t086590.1,Ms02t024530.1,Ms10t275100.1,Ms07t199140.1,Ms06t159600.1,Ms04t078330.1,Ms08t220950.1,Ms03t065700.1,Ms04t106670.1	CKAN_01279000,CKAN_01789700,CKAN_01556000,CKAN_00423200,CKAN_01894000,CKAN_00479400,CKAN_00880300	COCNU_HT001RO01_16T005240,COCNU_HT001RO01_04T011650,COCNU_HT001RO01_02T008020,COCNU_HT001RO01_04T005210,COCNU_HT001RO01_03T005640,COCNU_HT001RO01_05T007690	lm5633.a03.2.g04320_p1,lm5633.a03.4.g04760_p1,lm5633.a03.11.g02790_p1,lm5633.a03.8.g09400_p1	LOC_Os01g60430.1,LOC_Os01g15530.1,LOC_Os08g33700.1,LOC_Os09g24520.1,LOC_Os03g07330.1,LOC_Os01g74600.1	Glyma.09G272000.1,Glyma.19G117450.1,Glyma.07G226200.1,Glyma.01G048100.1,Glyma.18G252800.1,Glyma.09G236700.1,Glyma.19G209300.1,Glyma.03G001300.1,Glyma.17G101900.1,Glyma.15G228600.5,Glyma.02G250600.7,Glyma.18G277000.1	Zm00001e019452_T001,Zm00001e004121_T001,Zm00001e024036_T001,Zm00001e025557_T001,Zm00001e000621_T001	Zosma03g29890,Zosma01g28670,Zosma06g29950,Zosma02g01620,Zosma04g19810,Zosma01g09440,Zosma01g42060,Zosma01g04840	GO:0003723, GO:0090305, GO:0080156	RNA binding, nucleic acid phosphodiester bond hydrolysis, mitochondrial mRNA modification
OG0000563	Wa8730a001g005190	AT5G17790.1	Ms05t144370.1,Ms03t054910.1,Ms11t309750.1,Ms07t201120.1,Ms04t093620.1	CKAN_01552600,CKAN_00823200,CKAN_00326200	COCNU_HT001RO01_12T005820,COCNU_HT001RO01_04T005260	lm5633.a03.4.g04770_p1,lm5633.a03.15.g04520_p1	LOC_Os01g59980.1,LOC_Os05g40820.1,LOC_Os07g12250.1	Glyma.19G118900.1,Glyma.03G007200.1	Zm00001e019475_T001,Zm00001e027315_T003,Zm00001e012463_T004,Zm00001e028874_T001	Zosma02g18990,Zosma06g24470,Zosma03g20430	GO:0009570, GO:1900871, GO:0009658	chloroplast stroma, chloroplast mRNA modification, chloroplast organization
OG0000564	Wa8730a001g005200	AT3G09180.1	Ms03t054900.1	CKAN_00326300	COCNU_HT001RO01_04T011840	lm5633.a03.4.g04800_p1	LOC_Os01g15850.1	Glyma.19G026300.1	.	Zosma03g30390	GO:0005654, GO:0016592, GO:0044451	nucleoplasm, mediator complex, obsolete nucleoplasm part
OG0000565	Wa8730a001g005210	AT3G52200.1	Ms03t052910.1,Ms08t221500.1,Ms03t065210.1	.	COCNU_HT001RO01_12T005750	lm5633.a03.4.g04520_p1	LOC_Os08g33440.1,LOC_Os09g24320.1	.	Zm00001e004154_T001,Zm00001e018405_T001	Zosma03g30330,Zosma02g04610,Zosma06g21930	GO:0044444, GO:0045254, GO:0019904	obsolete cytoplasmic part, pyruvate dehydrogenase complex, protein domain specific binding
OG0000566	Wa8730a001g005220	AT3G51950.1	Ms05t144410.1,Ms08t215140.1,Ms06t174560.1,Ms11t321200.1,Ms08t227690.1,Ms10t274710.1,Ms10t271490.1	CKAN_00412600,CKAN_00689700	COCNU_HT001RO01_16T005140,COCNU_HT001RO01_04T012050,COCNU_HT001RO01_12T005760,COCNU_HT001RO01_04T005050,COCNU_HT001RO01_05T007800,COCNU_HT001RO01_13T002090	lm5633.a03.4.g04650_p1	LOC_Os11g03220.1,LOC_Os12g02970.1,LOC_Os03g21140.2,LOC_Os07g48410.1	Glyma.11G015600.1,Glyma.01G227200.1	Zm00001e001546_T001,Zm00001e039250_T003,Zm00001e035876_T001,Zm00001e024022_T001,Zm00001e010989_T001,Zm00001e038256_T001,Zm00001e020869_T002	Zosma02g17050,Zosma03g30340,Zosma01g28900	GO:0003674, GO:0003729, -	molecular_function, mRNA binding, 0
OG0000567	Wa8730a001g005230	AT3G04080.1,AT5G18280.1	Ms09t244150.1,Ms06t174550.1,Ms05t123570.1,Ms04t093630.1	CKAN_00413100,CKAN_00822500	COCNU_HT001RO01_16T005160,COCNU_HT001RO01_04T012030,COCNU_HT001RO01_04T005170,COCNU_HT001RO01_03T005800,COCNU_HT001RO01_13T002460	lm5633.a03.4.g04670_p1	LOC_Os11g03290.1,LOC_Os12g02980.1,LOC_Os03g21120.1,LOC_Os07g48430.1,LOC_Os08g33850.1	Glyma.02G069900.1	Zm00001e001545_T002,Zm00001e039249_T001,Zm00001e035877_T001,Zm00001e024023_T003,Zm00001e010990_T002,Zm00001e021296_T001	Zosma02g19020,Zosma06g24410	GO:0009846, GO:0004382, GO:0045134	pollen germination, guanosine-diphosphatase activity, uridine-diphosphatase activity
OG0000568	Wa8730a001g005240	AT5G35570.1,AT3G54100.1,AT2G03280.1	Ms05t144400.1,Ms03t055980.1,Ms09t256980.1,Ms11t321220.1,Ms04t086900.1,Ms07t199650.1,Ms08t224320.1	CKAN_00414000,CKAN_01927900,CKAN_01096300,CKAN_00689500	COCNU_HT001RO01_16T005170,COCNU_HT001RO01_04T012010,COCNU_HT001RO01_02T007040,COCNU_HT001RO01_05T007770	lm5633.a03.4.g04530_p1	LOC_Os03g21090.1,LOC_Os09g24570.1,LOC_Os01g07410.1,LOC_Os03g07310.1	Glyma.02G110800.1,Glyma.07G228200.1,Glyma.01G052500.1,Glyma.20G031501.1,Glyma.01G109800.1,Glyma.19G036400.1,Glyma.05G017900.1,Glyma.02G253400.1,Glyma.18G275300.1	Zm00001e001544_T001,Zm00001e025865_T003,Zm00001e018394_T001,Zm00001e030982_T002,Zm00001e016793_T001	Zosma02g17010,Zosma03g30360,Zosma02g04820,Zosma04g19570,Zosma01g10400,Zosma03g20490	GO:0009507, GO:0080157, GO:0007155	chloroplast, regulation of plant-type cell wall organization or biogenesis, cell adhesion
OG0000569	Wa8730a001g005250	.	.	.	.	lm5633.a03.4.g04490_p1	.	.	.	Zosma02g17070
OG0000570	Wa8730a001g005260	AT2G32990.1	Ms09t256100.1,Ms06t174580.1,Ms05t123530.1,Ms06t158040.1,Ms04t078610.1	CKAN_00768800,CKAN_01926000	COCNU_HT001RO01_16T005120	lm5633.a03.4.g04480_p1,lm5633.a03.11.g03390_p1	LOC_Os03g21210.1	.	Zm00001e001547_T001,Zm00001e038255_T001,Zm00001e030964_T002	Zosma02g17060,Zosma03g30320,Zosma02g02350,Zosma04g25020,Zosma05g31730	GO:0009504, GO:0008810, GO:0030244	cell plate, cellulase activity, cellulose biosynthetic process
OG0000571	Wa8730a001g005270	.	Ms02t024550.1,Ms11t312290.1	.	COCNU_HT001RO01_12T005740,COCNU_HT001RO01_04T005150	lm5633.a03.4.g04470_p1	LOC_Os01g60050.1	.	Zm00001e019472_T003,Zm00001e028871_T001	Zosma06g21990	GO:0015630, GO:0044448, GO:0005694	microtubule cytoskeleton, obsolete cell cortex part, chromosome
OG0000572	Wa8730a001g005280	AT3G54340.1,AT4G11880.1	Ms05t143130.1,Ms09t253690.1,Ms08t214990.1,Ms02t024830.1,Ms10t286860.1	CKAN_01290200	.	lm5633.a03.15.g03830_p1,lm5633.a03.8.g09720_p1	LOC_Os08g33488.1,LOC_Os01g74440.1	Glyma.05G018900.1	.	Zosma01g28990,Zosma01g41410	GO:0061458, GO:0009908, GO:0000900	reproductive system development, flower development, translation repressor activity, mRNA regulatory element binding
OG0000573	Wa8730a001g005290	.	.	.	.	.	.	.	.	.
OG0000575	Wa8730a001g005300	AT3G54220.1	Ms05t138550.1,Ms08t215170.1,Ms08t207730.1,Ms11t316520.1,Ms04t093550.1,Ms08t221640.1,Ms10t287890.1,Ms04t106920.1,Ms08t223930.1	CKAN_00767800,CKAN_00918700,CKAN_01459200,CKAN_00355900	COCNU_HT001RO01_12T005680,COCNU_HT001RO01_04T005010	lm5633.a03.2.g04150_p1,lm5633.a03.4.g04350_p1	LOC_Os11g03110.1,LOC_Os12g02870.1,LOC_Os05g40710.1,LOC_Os03g09280.2	Glyma.09G270000.1,Glyma.18G220100.1,Glyma.15G213300.1	Zm00001e024017_T001,Zm00001e009237_T001	Zosma02g17170,Zosma03g30300,Zosma06g21950	GO:0090610, GO:0051457, GO:0034504	bundle sheath cell fate specification, maintenance of protein location in nucleus, protein localization to nucleus
OG0000576	Wa8730a001g005310	.	.	.	.	.	.	.	.	.
OG0000577	Wa8730a001g005320	.	.	.	.	.	.	.	.	.
OG0000578	Wa8730a001g005330	AT2G38640.1	Ms03t055010.1,Ms09t256150.1,Ms06t174590.1,Ms06t147020.1,Ms05t123580.1,Ms07t201230.1,Ms06t158260.1,Ms11t316380.1,Ms10t296470.1	CKAN_00767000,CKAN_01786800	COCNU_HT001RO01_16T005060,COCNU_HT001RO01_04T012200,COCNU_HT001RO01_12T005930	lm5633.a03.15.g04220_p1,lm5633.a03.11.g02990_p1	LOC_Os11g02750.1,LOC_Os05g24650.1,LOC_Os12g02720.1,LOC_Os01g60170.1,LOC_Os05g40630.1	Glyma.16G222200.1,Glyma.11G020800.1,Glyma.01G222600.1,Glyma.05G212300.1	Zm00001e019464_T001,Zm00001e031965_T001,Zm00001e024008_T001,Zm00001e009245_T001,Zm00001e027308_T001,Zm00001e020872_T001,Zm00001e028866_T001	Zosma01g28960	-	0
OG0000579	Wa8730a001g005340	AT4G19890.1,AT1G08610.1,AT4G11690.1,AT2G03380.1,AT1G13040.1	Ms11t319960.1,Ms04t086250.1,Ms05t122970.1,Ms04t078840.1,Ms08t221170.1	CKAN_01790500,CKAN_00519400,CKAN_01549400,CKAN_00428400,CKAN_00824200,CKAN_00913900,CKAN_01700400	COCNU_HT001RO01_16T004810,COCNU_HT001RO01_04T011970,COCNU_HT001RO01_02T007250,COCNU_HT001RO01_04T004900,COCNU_HT001RO01_03T005660	lm5633.a03.2.g04320_p1,lm5633.a03.11.g03120_p1	LOC_Os05g24270.1,LOC_Os01g59890.1,LOC_Os03g60690.1,LOC_Os09g24520.1	Glyma.09G274800.1,Glyma.18G252502.1,Glyma.09G242500.1,Glyma.15G228600.5	Zm00001e039253_T001,Zm00001e031351_T001,Zm00001e021197_T002	Zosma02g17100,Zosma03g28240,Zosma06g30280,Zosma02g01870,Zosma06g21500,Zosma01g10790,Zosma03g20650,Zosma06g17110	GO:0004519, GO:0090305, GO:0003723	endonuclease activity, nucleic acid phosphodiester bond hydrolysis, RNA binding
OG0000580	Wa8730a001g005350	AT4G19645.4	Ms09t255840.1,Ms11t316510.1,Ms11t312330.1	.	COCNU_HT001RO01_12T005680,COCNU_HT001RO01_04T005020	.	LOC_Os01g60120.2,LOC_Os05g40700.1	Glyma.11G202100.2,Glyma.02G238600.1,Glyma.18G048700.4,Glyma.14G207500.1	Zm00001e019465_T005	Zosma01g28940,Zosma04g25000	GO:0009651, GO:0045454, GO:0050897	response to salt stress, cell redox homeostasis, cobalt ion binding
OG0000581	Wa8730a001g005360	AT1G57610.1	Ms02t024580.1	CKAN_00767900	COCNU_HT001RO01_12T005690,COCNU_HT001RO01_04T005030	lm5633.a03.2.g04330_p1	LOC_Os11g03130.1,LOC_Os12g02880.1,LOC_Os01g60110.1	Glyma.11G202000.2,Glyma.02G238500.1,Glyma.18G048800.1,Glyma.14G207400.1	Zm00001e019466_T001,Zm00001e020871_T001,Zm00001e028869_T001	Zosma04g25010	GO:0005739, GO:0005262, GO:0015292	mitochondrion, calcium channel activity, uniporter activity
OG0000582	Wa8730a001g005370	.	Ms08t214990.1,Ms02t024830.1	.	.	.	LOC_Os01g74440.1	.	Zm00001e018811_T001	.	GO:0048530, GO:0000900, GO:0048576	fruit morphogenesis, translation repressor activity, mRNA regulatory element binding, positive regulation of short-day photoperiodism, flowering
OG0000583	Wa8730a001g005380	.	Ms08t214990.1,Ms02t024830.1	.	.	lm5633.a03.8.g09720_p1	LOC_Os01g74440.1	.	.	.	GO:0030308, GO:0048530, GO:0080060	negative regulation of cell growth, fruit morphogenesis, integument development
OG0000584	Wa8730a001g005390	.	.	.	.	.	.	.	.	.
OG0000585	Wa8730a001g005400	AT5G38460.2	Ms05t123540.1	.	COCNU_HT001RO01_16T005090	lm5633.a03.2.g04360_p1	.	.	Zm00001e001549_T002	Zosma01g20100	GO:0006490, GO:0009101, GO:0042281	oligosaccharide-lipid intermediate biosynthetic process, glycoprotein biosynthetic process, dolichyl pyrophosphate Man9GlcNAc2 alpha-1,3-glucosyltransferase activity
OG0000586	Wa8730a001g005410	AT1G06780.1,AT2G38650.1,AT2G30575.1	Ms08t215160.1,Ms11t321180.1,Ms05t123560.1,Ms02t024570.1,Ms10t274740.1,Ms11t312310.1,Ms04t106660.1	CKAN_00768100	COCNU_HT001RO01_12T005700,COCNU_HT001RO01_04T005110,COCNU_HT001RO01_13T002170	lm5633.a03.2.g04350_p1,lm5633.a03.8.g08100_p1	LOC_Os11g03160.1,LOC_Os12g02910.1,LOC_Os03g21250.1,LOC_Os07g48370.1,LOC_Os05g40720.1	Glyma.09G269900.1,Glyma.18G220200.1	Zm00001e001553_T002,Zm00001e039252_T002,Zm00001e035874_T001,Zm00001e010987_T001,Zm00001e038254_T002	Zosma02g17090,Zosma01g28930,Zosma01g32770,Zosma05g05040	GO:0005794, GO:0005802, GO:0044431	Golgi apparatus, trans-Golgi network, obsolete Golgi apparatus part
OG0000587	Wa8730a001g005420	AT4G20140.1,AT5G02070.1,AT1G06840.1,AT5G38280.1,AT5G35370.1,AT3G51990.1,AT3G13380.1,AT2G33170.1	Ms03t054980.1,Ms09t256130.1,Ms01t020390.1,Ms06t174620.1,Ms11t320720.1,Ms08t226730.1,Ms04t087050.1,Ms05t122920.1,Ms02t024670.1,Ms10t275080.1,Ms07t199280.1,Ms05t132910.1,Ms10t271500.1,Ms04t092310.1,Ms08t230750.1,Ms04t078010.1,Ms08t221160.1,Ms10t287250.1,Ms03t065320.1,Ms04t107200.1,Ms11t307000.1,Ms02t034040.1	CKAN_00768500,CKAN_02144600,CKAN_00487600,CKAN_00355600,CKAN_01700700	COCNU_HT001RO01_16T005100,COCNU_HT001RO01_04T012260,COCNU_HT001RO01_02T007650,COCNU_HT001RO01_04T005130,COCNU_HT001RO01_03T004220,COCNU_HT001RO01_01T001130,COCNU_HT001RO01_05T007870	lm5633.a03.2.g04410_p1,lm5633.a03.4.g04310_p1,lm5633.a03.15.g03890_p1,lm5633.a03.8.g08700_p1	LOC_Os05g24010.1,LOC_Os03g21230.1,LOC_Os01g60060.1,LOC_Os05g40770.1,LOC_Os01g07280.1,LOC_Os02g53720.1	Glyma.09G274600.1,Glyma.11G200300.1,Glyma.18G215800.1,Glyma.02G237300.7,Glyma.18G050700.1,Glyma.04G222800.1,Glyma.06G142500.1,Glyma.19G021001.1,Glyma.18G271400.1	Zm00001e001548_T001,Zm00001e019469_T002,Zm00001e031972_T001,Zm00001e020857_T001,Zm00001e025583_T001,Zm00001e025874_T001,Zm00001e018356_T003,Zm00001e026079_T001,Zm00001e027177_T001	Zosma02g17080,Zosma01g20420,Zosma03g30580,Zosma01g29150,Zosma06g26010,Zosma02g01790,Zosma06g21740,Zosma05g25160,Zosma01g32550,Zosma03g20500,Zosma05g31540	GO:0044426, GO:0004675, GO:0007178	obsolete cell wall part, transmembrane receptor protein serine/threonine kinase activity, transmembrane receptor protein serine/threonine kinase signaling pathway
OG0000588	Wa8730a001g005430	AT5G05160.1,AT5G35580.2,AT2G26290.1,AT5G56460.1	Ms05t143070.1,Ms11t319980.1,Ms04t086840.1,Ms06t147040.1,Ms07t201190.1,Ms11t316420.1,Ms10t296480.1	CKAN_00767500,CKAN_00518800,CKAN_00806500,CKAN_02241200,CKAN_02455900,CKAN_00480600,CKAN_00356700,CKAN_00882700	COCNU_HT001RO01_12T005890,COCNU_HT001RO01_04T004960,COCNU_HT001RO01_01T015650,COCNU_HT001RO01_13T000980	lm5633.a03.2.g04250_p1,lm5633.a03.8.g08620_p1	LOC_Os11g02830.1,LOC_Os12g02810.1,LOC_Os07g48730.1,LOC_Os03g60710.1,LOC_Os03g08170.1,LOC_Os02g53750.1,LOC_Os01g74200.1,LOC_Os02g44920.1	Glyma.09G270200.1,Glyma.18G219900.1,Glyma.09G240700.1,Glyma.19G019900.1	Zm00001e024012_T003,Zm00001e009243_T001	Zosma02g17190,Zosma01g20420,Zosma06g25030,Zosma02g02260,Zosma04g19730,Zosma01g32740,Zosma01g10250	GO:0023052, GO:0007178, GO:0004675	signaling, transmembrane receptor protein serine/threonine kinase signaling pathway, transmembrane receptor protein serine/threonine kinase activity
OG0000589	Wa8730a001g005440	.	Ms06t159920.1,Ms10t281580.1	CKAN_00806100,CKAN_00878700	COCNU_HT001RO01_03T004660	lm5633.a03.2.g04270_p1	LOC_Os07g48360.1,LOC_Os02g54020.1	Glyma.11G201900.1	Zm00001e035873_T002,Zm00001e016051_T001	Zosma01g28950	GO:0097458, GO:1905773, GO:0061749	obsolete neuron part, 8-hydroxy-2'-deoxyguanosine DNA binding, forked DNA-dependent helicase activity
OG0000590	Wa8730a001g005450	AT3G07720.1,AT2G33070.1	.	.	.	.	.	Glyma.05G019700.1	Zm00001e033151_T001	Zosma02g20970,Zosma06g30340	GO:0019762, GO:0080028, GO:0080027	glucosinolate catabolic process, nitrile biosynthetic process, response to herbivore
OG0000591	Wa8730a001g005460	AT4G19985.1	.	CKAN_02144100	COCNU_HT001RO01_12T006040	lm5633.a03.2.g04650_p1	.	Glyma.04G224700.1	Zm00001e031304_T001	Zosma01g29050	-	0
OG0000592	Wa8730a001g005470	AT5G01960.1	Ms09t256200.1,Ms06t174610.1,Ms08t208050.1,Ms10t281610.1	CKAN_00765000,CKAN_00917400	COCNU_HT001RO01_16T005550	lm5633.a03.2.g04640_p1	LOC_Os05g25180.1,LOC_Os01g07390.1	Glyma.09G271400.1,Glyma.18G217900.1,Glyma.04G224200.1,Glyma.06G140600.1	Zm00001e031365_T001,Zm00001e025862_T001,Zm00001e016795_T001	Zosma03g30460,Zosma01g29080	-	0
OG0000593	Wa8730a001g005480	AT5G01960.1	Ms09t256200.1,Ms06t174610.1,Ms08t208050.1,Ms10t281610.1	CKAN_00765000,CKAN_00917400	COCNU_HT001RO01_16T005560,COCNU_HT001RO01_04T012230	lm5633.a03.2.g04630_p1,lm5633.a03.8.g08340_p1	LOC_Os05g25180.1,LOC_Os01g07390.1	Glyma.18G217900.1,Glyma.04G224200.1,Glyma.06G140600.1	Zm00001e031365_T001,Zm00001e025862_T001,Zm00001e016795_T002	Zosma03g30460,Zosma01g29080	GO:0034045, GO:0034497, GO:0080025	phagophore assembly site membrane, protein localization to phagophore assembly site, phosphatidylinositol-3,5-bisphosphate binding
OG0000594	Wa8730a001g005490	AT3G08600.1	Ms06t147060.1,Ms07t201280.1,Ms11t316360.1	CKAN_00764900	COCNU_HT001RO01_03T012670,COCNU_HT001RO01_12T006080,COCNU_HT001RO01_04T004860	lm5633.a03.2.g04620_p1	LOC_Os11g02630.1,LOC_Os12g02550.1	Glyma.09G271500.1,Glyma.11G200500.1,Glyma.18G217800.1,Glyma.02G237900.1,Glyma.18G050200.1,Glyma.03G001000.1,Glyma.16G221400.1,Glyma.08G020400.1,Glyma.05G213900.1	Zm00001e039266_T001,Zm00001e009257_T001	Zosma01g29090	-	0
OG0000595	Wa8730a001g005500	AT5G01950.1,AT1G06840.1,AT4G11890.2	Ms03t054980.1,Ms09t256130.1,Ms01t020390.1,Ms06t174620.1,Ms08t226730.1,Ms05t122920.1,Ms10t275080.1,Ms10t271590.1,Ms04t092330.1,Ms04t078010.1,Ms08t221160.1,Ms04t106810.1,Ms11t307000.1	CKAN_00764300,CKAN_01547400,CKAN_02144600,CKAN_02241200,CKAN_01457700,CKAN_00488700	COCNU_HT001RO01_04T012260,COCNU_HT001RO01_04T004810,COCNU_HT001RO01_03T004770,COCNU_HT001RO01_01T001100	lm5633.a03.2.g04610_p1,lm5633.a03.4.g04440_p1,lm5633.a03.15.g04100_p1,lm5633.a03.8.g09820_p1	LOC_Os05g25370.1,LOC_Os03g21510.1,LOC_Os07g48310.1,LOC_Os01g60280.1,LOC_Os05g40270.1	Glyma.09G272300.9,Glyma.11G200300.1,Glyma.18G217000.1,Glyma.02G237300.2,Glyma.18G050700.1,Glyma.14G206300.1,Glyma.17G102600.1	Zm00001e001548_T001,Zm00001e019457_T001,Zm00001e031936_T002,Zm00001e016406_T001	Zosma02g17360,Zosma03g30580,Zosma01g29150,Zosma06g29810,Zosma02g01600,Zosma05g25160,Zosma01g32390,Zosma02g07370	GO:0007178, GO:0046777, GO:0004675	transmembrane receptor protein serine/threonine kinase signaling pathway, protein autophosphorylation, transmembrane receptor protein serine/threonine kinase activity
OG0000596	Wa8730a001g005510	AT4G20940.1,AT5G01950.1,AT1G06840.1,AT2G33170.1	Ms05t144710.1,Ms03t054980.1,Ms09t244030.1,Ms09t256130.1,Ms01t020390.1,Ms06t174620.1,Ms04t085450.1,Ms05t132150.1,Ms04t078010.1,Ms08t221160.1	CKAN_00764300,CKAN_00904500	COCNU_HT001RO01_16T005100,COCNU_HT001RO01_04T012590,COCNU_HT001RO01_04T004810	lm5633.a03.2.g04610_p1	LOC_Os03g21230.1,LOC_Os01g60280.1,LOC_Os01g07560.1	Glyma.09G272300.9,Glyma.11G200300.1,Glyma.18G217000.1,Glyma.02G237300.2,Glyma.18G050700.1,Glyma.14G206200.1	Zm00001e019457_T001,Zm00001e031936_T001,Zm00001e021264_T001,Zm00001e025874_T001	Zosma02g17360,Zosma01g19390,Zosma01g29150,Zosma02g02270,Zosma01g32880	GO:0048354, GO:0005886, GO:0071944	mucilage biosynthetic process involved in seed coat development, plasma membrane, cell periphery
OG0000597	Wa8730a001g005520	AT4G11150.1,AT3G08560.1	Ms04t085770.1,Ms04t092540.1,Ms04t078830.1	CKAN_02245700,CKAN_00479600	COCNU_HT001RO01_04T012280,COCNU_HT001RO01_12T006110	lm5633.a03.2.g04610_p1	LOC_Os05g40230.1,LOC_Os01g12260.1	Glyma.08G020300.1,Glyma.05G213800.1	Zm00001e016428_T001	Zosma02g07430	GO:0007030, GO:0046961, GO:0036442	Golgi organization, proton-transporting ATPase activity, rotational mechanism, proton-exporting ATPase activity, phosphorylative mechanism
OG0000598	Wa8730a001g005530	AT2G30520.1,AT3G08570.1	Ms05t146190.1,Ms11t319820.1,Ms07t201310.1	CKAN_00763900	COCNU_HT001RO01_12T006100,COCNU_HT001RO01_04T004790	lm5633.a03.2.g04600_p1,lm5633.a03.15.g04110_p1	LOC_Os11g02610.1,LOC_Os12g02530.1	Glyma.09G272500.1,Glyma.11G200201.1,Glyma.18G216600.1,Glyma.02G237100.1,Glyma.18G050800.1,Glyma.14G206100.1	Zm00001e039271_T001,Zm00001e009259_T001	Zosma02g17390,Zosma03g20420	GO:0005737, GO:0009638, GO:0005634	cytoplasm, phototropism, nucleus
OG0000599	Wa8730a001g005540	AT3G08670.1	Ms03t055060.1,Ms10t271550.1	CKAN_00916700	COCNU_HT001RO01_16T005590,COCNU_HT001RO01_04T012300,COCNU_HT001RO01_04T004770	lm5633.a03.2.g04590_p1	LOC_Os05g25220.1,LOC_Os01g60309.1,LOC_Os05g40220.1	Glyma.09G272800.1,Glyma.18G216300.1,Glyma.03G001700.3,Glyma.16G220600.1	Zm00001e019456_T003,Zm00001e031933_T001,Zm00001e027304_T001,Zm00001e028861_T001	Zosma01g29160	-	0
OG0000600	Wa8730a001g005550	AT3G10670.1	Ms10t274850.1,Ms04t078260.1	CKAN_00763700,CKAN_01699100	COCNU_HT001RO01_04T012310	lm5633.a03.2.g04570_p1	LOC_Os03g21490.1	.	Zm00001e001565_T002	Zosma02g21160,Zosma01g20230,Zosma01g29170	GO:0042623, GO:0043492, GO:0042626	ATPase activity, ATPase-coupled transmembrane transporter activity, ATPase-coupled transmembrane transporter activity
OG0000601	Wa8730a001g005560	AT4G13370.1	Ms04t087490.1,Ms07t201250.1	CKAN_00766500,CKAN_01786700	COCNU_HT001RO01_12T005950	lm5633.a03.2.g04430_p1	LOC_Os11g02740.1,LOC_Os12g02710.1,LOC_Os03g08390.1	Glyma.05G012600.2	Zm00001e024007_T001	Zosma01g28870	-	0
OG0000602	Wa8730a001g005570	.	Ms03t055020.1,Ms09t256160.1,Ms08t227670.1,Ms05t132930.1	CKAN_01786500	COCNU_HT001RO01_16T005030,COCNU_HT001RO01_04T012180,COCNU_HT001RO01_13T001950	lm5633.a03.2.g04440_p1	LOC_Os03g21270.1,LOC_Os05g40220.1	Glyma.04G225000.8,Glyma.06G139800.4	Zm00001e038253_T001	Zosma02g17220	-	0
OG0000603	Wa8730a001g005580	AT2G38630.1,AT3G54190.1	Ms05t133140.1	CKAN_01786400	COCNU_HT001RO01_12T005970,COCNU_HT001RO01_03T004900,COCNU_HT001RO01_13T001940	lm5633.a03.2.g04450_p1,lm5633.a03.8.g08230_p1	LOC_Os01g60200.1,LOC_Os05g40410.1,LOC_Os02g54090.1	Glyma.09G270700.1,Glyma.18G219000.6,Glyma.02G220400.1,Glyma.04G224900.1,Glyma.06G139900.1,Glyma.14G187400.1	Zm00001e031964_T001,Zm00001e027307_T001,Zm00001e018344_T005,Zm00001e016056_T001	Zosma02g19040	-	0
OG0000604	Wa8730a001g005590	.	.	.	.	lm5633.a03.2.g04310_p1	.	Glyma.05G023000.1	.	.	-	0
OG0000605	Wa8730a001g005600	AT1G06450.1	.	.	.	.	.	.	.	.	GO:0030015, GO:0004535, GO:0030014	CCR4-NOT core complex, poly(A)-specific ribonuclease activity, CCR4-NOT complex
OG0000606	Wa8730a001g005610	AT4G20780.1	Ms09t244090.1,Ms09t256020.1,Ms06t147360.1,Ms08t208060.1	CKAN_00326700,CKAN_00918900,CKAN_01508600	COCNU_HT001RO01_16T005480,COCNU_HT001RO01_04T012110,COCNU_HT001RO01_04T005080	lm5633.a03.2.g04690_p1,lm5633.a03.4.g04850_p1	LOC_Os11g04770.1,LOC_Os05g24780.1,LOC_Os12g04580.1,LOC_Os03g21380.2,LOC_Os07g48340.1,LOC_Os03g59790.1	Glyma.09G270900.1	Zm00001e001557_T001,Zm00001e035870_T001,Zm00001e010984_T001,Zm00001e038252_T001,Zm00001e026863_T001	Zosma02g17260,Zosma03g30510,Zosma01g32830	GO:0010090, GO:0032989, GO:0010091	trichome morphogenesis, cellular component morphogenesis, trichome branching
OG0000607	Wa8730a001g005620	AT5G58240.1,AT1G06790.1	.	CKAN_01786900	COCNU_HT001RO01_12T005910	lm5633.a03.2.g04300_p1	LOC_Os11g02760.1,LOC_Os12g02730.1	Glyma.11G201800.1,Glyma.18G049100.3,Glyma.19G215300.1	.	.	GO:0006384, GO:0043530, GO:0047627	transcription initiation from RNA polymerase III promoter, adenosine 5'-monophosphoramidase activity, adenylylsulfatase activity
OG0000609	Wa8730a001g005630	AT3G54340.1,AT2G03060.3	Ms05t143130.1	CKAN_01509600	COCNU_HT001RO01_01T001170	lm5633.a03.15.g03830_p1	LOC_Os08g33488.1	Glyma.07G228900.1,Glyma.20G034000.3,Glyma.17G101300.7,Glyma.05G025700.3	Zm00001e018811_T001	Zosma01g10760,Zosma01g04980	GO:0060284, GO:0010152, GO:0080092	regulation of cell development, pollen maturation, regulation of pollen tube growth
OG0000610	Wa8730a001g005640	.	Ms11t321160.1,Ms10t274750.1	CKAN_01786300	COCNU_HT001RO01_16T005460,COCNU_HT001RO01_04T012150	lm5633.a03.2.g04720_p1	LOC_Os05g24684.1,LOC_Os07g48350.1	Glyma.09G270766.1,Glyma.18G218900.1	Zm00001e031371_T001,Zm00001e035871_T002,Zm00001e010985_T001	.	-	0
OG0000611	Wa8730a001g005650	AT4G20780.1	Ms09t244090.1,Ms09t256020.1,Ms06t147360.1,Ms08t208060.1	CKAN_00918900,CKAN_01508600	COCNU_HT001RO01_16T005480,COCNU_HT001RO01_04T012110,COCNU_HT001RO01_04T005080	lm5633.a03.2.g04690_p1	LOC_Os05g24780.1,LOC_Os03g21380.1,LOC_Os07g48340.1,LOC_Os03g59790.1	Glyma.09G270900.1	Zm00001e001557_T001,Zm00001e035870_T001,Zm00001e010984_T001,Zm00001e038252_T001,Zm00001e026863_T001	Zosma02g17260,Zosma03g30510,Zosma01g32830	GO:0032989, GO:0010091, GO:0010090	cellular component morphogenesis, trichome branching, trichome morphogenesis
OG0000612	Wa8730a001g005660	AT1G06450.1	.	.	.	.	.	.	.	.	GO:0030015, GO:0004535, GO:0030014	CCR4-NOT core complex, poly(A)-specific ribonuclease activity, CCR4-NOT complex
OG0000613	Wa8730a001g005670	.	.	.	.	lm5633.a03.2.g04680_p1	.	.	.	.
OG0000614	Wa8730a001g005680	.	.	CKAN_01508900	.	lm5633.a03.2.g04660_p1	.	Glyma.02G238400.3,Glyma.14G207300.1	Zm00001e023842_T001	.	GO:0034088, GO:0000070, GO:0032116	maintenance of mitotic sister chromatid cohesion, mitotic sister chromatid segregation, SMC loading complex
OG0000615	Wa8730a001g005690	.	.	.	.	.	.	.	.	.
OG0000616	Wa8730a001g005700	AT5G58300.1,AT5G02070.1,AT5G05160.1,AT1G06840.1,AT3G51740.1,AT2G26730.1,AT3G08680.2,AT2G33080.1	Ms05t144490.1,Ms03t055080.1,Ms01t020560.1,Ms06t174620.1,Ms11t319980.1,Ms08t226690.1,Ms04t086210.1,Ms05t122860.1,Ms07t201330.1,Ms02t041990.1,Ms11t316350.1,Ms10t271700.1,Ms04t092330.1	CKAN_00763600,CKAN_00518800,CKAN_01547600,CKAN_02144600,CKAN_02245400,CKAN_00910000,CKAN_01946400,CKAN_00481500,CKAN_01509300,CKAN_00882700,CKAN_00249500	COCNU_HT001RO01_16T005600,COCNU_HT001RO01_04T012320,COCNU_HT001RO01_03T012710,COCNU_HT001RO01_12T006130,COCNU_HT001RO01_04T004760,COCNU_HT001RO01_03T004100	lm5633.a03.2.g04530_p1,lm5633.a03.4.g04560_p1,lm5633.a03.15.g02470_p1,lm5633.a03.8.g08410_p1	LOC_Os03g21510.2,LOC_Os07g48310.1,LOC_Os01g60330.1,LOC_Os05g40200.1,LOC_Os03g60710.1,LOC_Os01g12390.1	Glyma.09G272900.4,Glyma.11G199700.5,Glyma.18G216200.1,Glyma.02G237000.1,Glyma.18G051100.2,Glyma.02G219800.1,Glyma.04G223800.2,Glyma.06G141100.6,Glyma.14G206000.1,Glyma.17G103400.1,Glyma.05G011600.1,Glyma.01G224000.1,Glyma.05G214300.5,Glyma.14G187900.2	Zm00001e001566_T001,Zm00001e019455_T002,Zm00001e031932_T003,Zm00001e035867_T002,Zm00001e028860_T001,Zm00001e026077_T001,Zm00001e027177_T001	Zosma02g16840,Zosma01g19390,Zosma03g30560,Zosma01g29180,Zosma06g26010,Zosma01g32880,Zosma01g04670,Zosma02g07310,Zosma05g04990	GO:0005886, GO:2000605, GO:0009505	plasma membrane, positive regulation of secondary growth, plant-type cell wall
OG0000617	Wa8730a001g005710	AT5G05410.1,AT2G38340.1,AT3G54320.1,AT3G11020.1,AT4G11140.1,AT1G12980.1	Ms05t144460.1,Ms09t244400.1,Ms11t321120.1,Ms04t086270.1,Ms07t201340.1,Ms08t208160.1,Ms11t316350.1,Ms04t093430.1,Ms08t221230.1	CKAN_00763300,CKAN_00991200,CKAN_02245000	COCNU_HT001RO01_16T005620,COCNU_HT001RO01_04T012360,COCNU_HT001RO01_03T012750,COCNU_HT001RO01_12T006160,COCNU_HT001RO01_04T004730	lm5633.a03.2.g04550_p1,lm5633.a03.15.g04140_p1,lm5633.a03.8.g08910_p1	LOC_Os05g25260.1,LOC_Os07g47330.1,LOC_Os03g60120.1,LOC_Os07g12510.1,LOC_Os01g12440.1	Glyma.11G199300.1,Glyma.02G236800.1,Glyma.18G051500.3,Glyma.14G205600.1,Glyma.03G255500.1,Glyma.19G253100.1,Glyma.08G020900.1,Glyma.05G214400.1	Zm00001e024001_T001,Zm00001e006139_T001,Zm00001e033146_T001,Zm00001e026081_T001,Zm00001e016421_T001	Zosma01g17800,Zosma01g29190,Zosma01g09560	GO:0003700, GO:0048825, GO:0043565	DNA-binding transcription factor activity, cotyledon development, sequence-specific DNA binding
OG0000618	Wa8730a001g005720	AT1G06840.1,AT5G38990.1,AT5G28680.1,AT3G51550.1	Ms03t055090.1,Ms09t244070.1,Ms09t256130.1,Ms01t020390.1,Ms06t174620.1,Ms11t320720.1,Ms08t227640.1,Ms10t275080.1,Ms08t208180.1,Ms11t317150.1,Ms10t271590.1,Ms04t078010.1,Ms11t312780.1,Ms08t221160.1	CKAN_00768900,CKAN_00527100,CKAN_01547400,CKAN_02144600,CKAN_00806500,CKAN_00910000,CKAN_02456700,CKAN_00487600,CKAN_01701400	COCNU_HT001RO01_16T005670,COCNU_HT001RO01_04T012380,COCNU_HT001RO01_04T005130,COCNU_HT001RO01_03T004380,COCNU_HT001RO01_01T001130	lm5633.a03.2.g04560_p1,lm5633.a03.4.g04310_p1,lm5633.a03.15.g04280_p1,lm5633.a03.8.g09820_p1	LOC_Os05g25450.1,LOC_Os03g21540.1,LOC_Os02g53750.1,LOC_Os01g74550.1	Glyma.09G273300.1,Glyma.18G215800.1,Glyma.03G247800.1,Glyma.17G102600.1,Glyma.19G033100.1,Glyma.13G054400.1,Glyma.18G270600.1	Zm00001e001570_T001,Zm00001e031360_T001,Zm00001e038250_T002,Zm00001e009251_T001,Zm00001e025583_T001	Zosma02g17080,Zosma01g18430,Zosma03g30580,Zosma01g29150,Zosma06g30010,Zosma02g02260,Zosma01g10900,Zosma01g40930,Zosma01g04770,Zosma02g06860	GO:0009788, GO:0043680, GO:0044462	negative regulation of abscisic acid-activated signaling pathway, filiform apparatus, obsolete external encapsulating structure part
OG0000619	Wa8730a001g005730	AT5G02070.1,AT1G06840.1,AT5G39000.1,AT5G28680.1,AT3G51550.1	Ms03t055090.1,Ms09t244070.1,Ms09t256130.1,Ms01t020390.1,Ms06t174620.1,Ms11t320720.1,Ms08t227640.1,Ms10t275080.1,Ms05t132910.1,Ms08t208180.1,Ms11t317150.1,Ms10t271590.1,Ms04t078010.1,Ms11t312780.1,Ms08t221160.1,Ms10t287240.1	CKAN_00768900,CKAN_00527100,CKAN_01547400,CKAN_02144600,CKAN_00806500,CKAN_00910000,CKAN_01944100,CKAN_02456700,CKAN_00487600,CKAN_01701400	COCNU_HT001RO01_16T005670,COCNU_HT001RO01_04T012380,COCNU_HT001RO01_04T005130,COCNU_HT001RO01_03T004380,COCNU_HT001RO01_01T001130	lm5633.a03.2.g04560_p1,lm5633.a03.4.g04440_p1	LOC_Os05g25450.1,LOC_Os03g21540.1,LOC_Os03g60810.1,LOC_Os02g53750.1,LOC_Os01g12720.1	Glyma.09G273300.1,Glyma.18G215800.1,Glyma.03G247800.1,Glyma.17G102600.1,Glyma.19G033100.1,Glyma.13G053600.2,Glyma.18G270600.1	Zm00001e001570_T001,Zm00001e031360_T001,Zm00001e038250_T002,Zm00001e009251_T001,Zm00001e025583_T001	Zosma02g17080,Zosma01g18430,Zosma03g30580,Zosma01g29150,Zosma06g30010,Zosma01g04670	GO:0090404, GO:0044426, GO:0030308	pollen tube tip, obsolete cell wall part, negative regulation of cell growth
OG0000620	Wa8730a001g005740	.	Ms08t228060.1	CKAN_00763200	.	.	.	Glyma.20G176400.1,Glyma.10G215300.1	.	Zosma06g16540	GO:0015979, GO:0048564, GO:0019684	photosynthesis, photosystem I assembly, photosynthesis, light reaction
OG0000621	Wa8730a001g005750	AT5G01920.1	Ms07t201350.1	CKAN_00762700,CKAN_00919400	COCNU_HT001RO01_04T004700	.	LOC_Os05g40180.1	Glyma.18G215500.1,Glyma.03G002200.2,Glyma.16G220200.1	Zm00001e031931_T001	Zosma01g19470,Zosma03g30590,Zosma06g29410,Zosma06g21820,Zosma05g25230	GO:0009507, GO:0042549, GO:0009579	chloroplast, photosystem II stabilization, thylakoid
OG0000622	Wa8730a001g005760	AT5G05200.1	Ms08t227610.1,Ms04t086500.1,Ms10t271610.1,Ms04t078000.1	CKAN_00762300,CKAN_01254200	COCNU_HT001RO01_04T012660,COCNU_HT001RO01_04T004680	lm5633.a03.2.g04740_p1	LOC_Os07g12530.1	Glyma.02G219333.1,Glyma.14G186700.1	Zm00001e033147_T002	Zosma01g29220,Zosma01g10480,Zosma01g36550	GO:1902171, GO:0010287, GO:0080177	regulation of tocopherol cyclase activity, plastoglobule, plastoglobule organization
OG0000623	Wa8730a001g005770	AT2G40770.1	Ms03t055140.1,Ms05t131470.1	CKAN_01328400	COCNU_HT001RO01_04T012450	.	.	Glyma.02G219200.1,Glyma.14G186500.1	Zm00001e035860_T003	Zosma03g30710,Zosma01g29230	GO:0031625, GO:0000209, GO:0061630	ubiquitin protein ligase binding, protein polyubiquitination, ubiquitin protein ligase activity
OG0000624	Wa8730a001g005780	AT5G04930.1,AT2G40770.1,AT1G13210.1	Ms05t144340.1,Ms03t054880.1,Ms09t244200.1,Ms09t256250.1,Ms06t174460.1,Ms08t227740.1,Ms05t123660.1,Ms10t271460.1	CKAN_02144400,CKAN_00906600	COCNU_HT001RO01_16T005640,COCNU_HT001RO01_04T011800	lm5633.a03.2.g04750_p1	LOC_Os03g21680.3,LOC_Os07g48270.1	Glyma.09G273900.1,Glyma.18G213100.5,Glyma.02G219200.1,Glyma.16G220100.12,Glyma.14G186500.1	Zm00001e001530_T001,Zm00001e035860_T001,Zm00001e017383_T002,Zm00001e038245_T001	Zosma01g28710,Zosma05g25460	GO:0004012, GO:0000209, GO:0045332	ATPase-coupled intramembrane lipid transporter activity, protein polyubiquitination, phospholipid translocation
OG0000625	Wa8730a001g005790	AT1G12770.1	Ms06t171980.1,Ms08t207870.1	CKAN_00914800,CKAN_02452200,CKAN_00479000	COCNU_HT001RO01_04T011110,COCNU_HT001RO01_04T004660	lm5633.a03.2.g04770_p1	.	Glyma.11G199100.1,Glyma.18G051700.1,Glyma.19G217400.2	Zm00001e038223_T001	Zosma06g21510,Zosma01g05220	GO:0070035, GO:0010501, GO:0003724	obsolete purine NTP-dependent helicase activity, RNA secondary structure unwinding, RNA helicase activity
OG0000626	Wa8730a001g005800	AT1G07000.1	Ms10t273440.1,Ms07t201640.1,Ms10t271920.1	CKAN_00531500	COCNU_HT001RO01_03T004740	lm5633.a03.15.g03500_p1	LOC_Os01g61190.1	.	Zm00001e019408_T001	Zosma01g18910,Zosma02g07420	GO:0099568, GO:1902290, GO:0002238	cytoplasmic region, positive regulation of defense response to oomycetes, response to molecule of fungal origin
OG0000627	Wa8730a001g005810	AT5G01900.1,AT2G40740.3,AT4G11070.1,AT3G56400.1	Ms09t244040.1,Ms09t256270.1,Ms06t174670.1,Ms04t085720.1,Ms05t123510.1,Ms08t208200.1,Ms04t092450.1	CKAN_00761700,CKAN_02241600,CKAN_00914700,CKAN_02457800,CKAN_00886500	COCNU_HT001RO01_16T005840,COCNU_HT001RO01_04T012540,COCNU_HT001RO01_12T006170	lm5633.a03.2.g04780_p1	LOC_Os05g25770.1,LOC_Os03g21710.1,LOC_Os07g48260.1,LOC_Os01g60520.1	Glyma.09G274000.1,Glyma.18G213200.1,Glyma.04G223200.1,Glyma.06G142100.1,Glyma.16G219800.1,Glyma.14G186000.1	Zm00001e035859_T001,Zm00001e038239_T001,Zm00001e028850_T001	Zosma01g18750,Zosma06g22960,Zosma05g25030	GO:1905622, GO:1900056, GO:0003700	negative regulation of leaf development, negative regulation of leaf senescence, DNA-binding transcription factor activity
OG0000628	Wa8730a001g005820	AT2G40760.1	Ms06t158220.1	CKAN_00761500	COCNU_HT001RO01_16T005830,COCNU_HT001RO01_01T000860	lm5633.a03.2.g04790_p1	LOC_Os05g25780.1	Glyma.02G218900.1	Zm00001e031372_T001	Zosma01g18050,Zosma06g16520	-	0
OG0000629	Wa8730a001g005830	.	Ms09t256280.1,Ms02t041720.1	.	.	lm5633.a03.2.g04800_p1	.	.	.	.	GO:0044429, GO:0005743, GO:0005740	obsolete mitochondrial part, mitochondrial inner membrane, mitochondrial envelope
OG0000630	Wa8730a001g005840	.	.	.	.	.	.	.	.	.
OG0000631	Wa8730a001g005850	AT2G30480.5	.	CKAN_01548700	COCNU_HT001RO01_16T005820	.	LOC_Os01g07330.3	Glyma.11G198150.1,Glyma.18G052000.2	Zm00001e025857_T001	Zosma02g22210	GO:0090305, GO:0004519, GO:0009451	nucleic acid phosphodiester bond hydrolysis, endonuclease activity, RNA modification
OG0000635	Wa8730a001g005860	AT3G51740.1,AT2G33050.1,AT1G58190.2	Ms05t146180.1,Ms03t054980.1,Ms09t244030.1,Ms06t174680.1,Ms04t086160.1,Ms04t091200.1,Ms04t078500.1,Ms02t034040.1	CKAN_00749200,CKAN_00529000,CKAN_00904600,CKAN_01944000,CKAN_00185400,CKAN_00885100,CKAN_00247300	COCNU_HT001RO01_16T005810,COCNU_HT001RO01_04T012590,COCNU_HT001RO01_12T006210,COCNU_HT001RO01_04T004540,COCNU_HT001RO01_03T004220	lm5633.a03.2.g04830_p1,lm5633.a03.4.g04310_p1,lm5633.a03.8.g08700_p1	LOC_Os05g24010.1,LOC_Os03g21730.1,LOC_Os01g60670.1,LOC_Os05g40050.1,LOC_Os03g18630.1	Glyma.09G274600.1,Glyma.18G213600.1,Glyma.01G133300.1,Glyma.19G030400.1,Glyma.15G088400.1	Zm00001e001582_T001,Zm00001e031928_T001,Zm00001e027177_T001	Zosma02g17080,Zosma01g19390,Zosma03g30800,Zosma01g29150,Zosma06g21850	GO:0071383, GO:0009742, GO:0071367	cellular response to steroid hormone stimulus, brassinosteroid mediated signaling pathway, cellular response to brassinosteroid stimulus
OG0000636	Wa8730a001g005870	AT2G38530.1	.	.	COCNU_HT001RO01_12T006290,COCNU_HT001RO01_04T004490	lm5633.a03.2.g04940_p1	LOC_Os11g02400.1,LOC_Os12g02340.1	Glyma.09G275500.1,Glyma.18G214600.1,Glyma.03G040400.1,Glyma.01G130000.1	.	Zosma01g19370	GO:0090378, GO:1901957, GO:0006649	seed trichome elongation, regulation of cutin biosynthetic process, phospholipid transfer to membrane
OG0000637	Wa8730a001g005880	.	Ms04t093360.1	CKAN_02143100,CKAN_00911500	COCNU_HT001RO01_04T004490	lm5633.a03.2.g04920_p1	LOC_Os11g02389.1,LOC_Os12g02320.1,LOC_Os01g60740.1,LOC_Os05g40010.1	Glyma.18G210900.1,Glyma.03G040000.1,Glyma.01G130000.1	Zm00001e039316_T001,Zm00001e019437_T001	Zosma01g18030	GO:1901957, GO:0010876, GO:0006649	regulation of cutin biosynthetic process, lipid localization, phospholipid transfer to membrane
OG0000638	Wa8730a001g005890	AT1G06850.1,AT2G40620.1	Ms05t146160.1,Ms09t256300.1,Ms06t174720.1,Ms11t319880.1,Ms02t041740.1	CKAN_00912100	COCNU_HT001RO01_16T005770,COCNU_HT001RO01_04T012650,COCNU_HT001RO01_12T006280	lm5633.a03.2.g04900_p1,lm5633.a03.8.g08610_p1	LOC_Os03g21800.1,LOC_Os07g48180.1	Glyma.11G186700.1,Glyma.02G236200.1,Glyma.18G052500.1,Glyma.04G222200.1,Glyma.06G143200.1,Glyma.14G204100.1	Zm00001e001587_T001,Zm00001e035856_T001,Zm00001e010978_T001,Zm00001e038237_T001	Zosma06g26120,Zosma05g25140,Zosma01g10600	GO:0044424, GO:0003700, GO:0005634	obsolete intracellular part, DNA-binding transcription factor activity, nucleus
OG0000639	Wa8730a001g005900	AT5G01880.1,AT5G05280.1,AT3G10910.1	Ms05t143470.1,Ms11t319870.1,Ms04t086610.1,Ms04t096570.1,Ms07t201430.1,Ms05t131690.1,Ms04t093140.1,Ms08t231090.1,Ms04t078050.1,Ms11t305560.1	CKAN_00526800,CKAN_01545400,CKAN_00912200,CKAN_01964800,CKAN_01099100,CKAN_00886000	COCNU_HT001RO01_12T006270,COCNU_HT001RO01_04T004630	lm5633.a03.2.g04870_p1,lm5633.a03.8.g09010_p1	LOC_Os11g02424.1,LOC_Os12g02350.1,LOC_Os01g60730.1,LOC_Os05g40020.1,LOC_Os05g07140.1	.	Zm00001e001605_T001,Zm00001e039314_T001,Zm00001e019438_T001,Zm00001e031922_T001,Zm00001e015470_T001	Zosma06g29200,Zosma01g36610	GO:0044257, GO:0043161, GO:0016567	cellular protein catabolic process, proteasome-mediated ubiquitin-dependent protein catabolic process, protein ubiquitination
OG0000640	Wa8730a001g005910	AT5G05240.1,AT2G40630.1,AT3G08740.1	Ms03t055150.1,Ms08t227620.1,Ms10t273250.1	CKAN_00760100,CKAN_00913800	COCNU_HT001RO01_04T004560	lm5633.a03.2.g04840_p1	LOC_Os11g02450.1,LOC_Os12g02380.1	Glyma.09G275000.1,Glyma.18G213900.1	Zm00001e039313_T003	Zosma02g22170,Zosma01g36340	-	0
OG0000641	Wa8730a001g005920	AT5G58300.1,AT5G01890.1,AT3G51740.1,AT3G56370.1,AT1G58190.2	Ms05t146180.1,Ms03t054970.1,Ms09t244030.1,Ms01t020560.1,Ms06t174680.1,Ms11t319980.1,Ms05t129670.1,Ms04t087060.1,Ms05t124420.1,Ms04t096320.1,Ms11t316350.1,Ms10t271700.1,Ms08t231170.1,Ms04t078500.1,Ms06t178170.1,Ms10t287250.1,Ms10t281440.1,Ms02t034040.1	CKAN_00760400,CKAN_00994500,CKAN_00529800,CKAN_02136000,CKAN_01333400,CKAN_02245400,CKAN_00905400,CKAN_01944000,CKAN_02450200,CKAN_01095700,CKAN_00488700,CKAN_00181700,CKAN_01700700,CKAN_00247700,CKAN_01257600	COCNU_HT001RO01_16T005810,COCNU_HT001RO01_04T012590,COCNU_HT001RO01_03T013710,COCNU_HT001RO01_12T006210,COCNU_HT001RO01_04T004540,COCNU_HT001RO01_03T004100	lm5633.a03.2.g04830_p1,lm5633.a03.15.g03810_p1,lm5633.a03.8.g08700_p1	LOC_Os11g01620.1,LOC_Os12g01700.1,LOC_Os03g21730.1,LOC_Os07g48310.1,LOC_Os01g60670.1,LOC_Os05g40050.2,LOC_Os03g18630.1,LOC_Os05g07740.1,LOC_Os01g07560.1	Glyma.09G274600.1,Glyma.18G213600.1,Glyma.04G222800.1,Glyma.06G142500.1,Glyma.03G253800.1,Glyma.03G034200.1,Glyma.01G133300.1,Glyma.19G251300.1,Glyma.14G057400.1,Glyma.05G011600.1,Glyma.18G269400.1,Glyma.14G189100.1	Zm00001e001582_T001,Zm00001e019441_T001,Zm00001e031928_T001,Zm00001e035867_T001,Zm00001e023928_T001,Zm00001e001353_T001,Zm00001e021264_T003,Zm00001e020858_T001,Zm00001e039201_T001,Zm00001e026077_T001,Zm00001e014391_T001	Zosma02g22180,Zosma01g19390,Zosma03g30810,Zosma01g28110,Zosma05g26090,Zosma06g16700,Zosma02g07310	GO:0007178, GO:2000605, GO:0004675	transmembrane receptor protein serine/threonine kinase signaling pathway, positive regulation of secondary growth, transmembrane receptor protein serine/threonine kinase activity
OG0000642	Wa8730a001g005930	AT5G05310.2	Ms06t147150.1	CKAN_02140300	COCNU_HT001RO01_04T004270	lm5633.a03.2.g05270_p1	LOC_Os11g02159.2,LOC_Os12g02100.1	.	Zm00001e039333_T001	Zosma06g21330	-	0
OG0000643	Wa8730a001g005940	AT5G01800.1,AT3G51730.1	Ms08t227550.1,Ms06t147160.1,Ms02t041800.1,Ms11t316220.1,Ms10t271650.1,Ms11t306360.1	CKAN_00757300	COCNU_HT001RO01_16T005880,COCNU_HT001RO01_04T012830	lm5633.a03.2.g05280_p1	LOC_Os11g02150.1,LOC_Os05g26954.1,LOC_Os12g02094.1,LOC_Os01g07250.1	Glyma.18G211900.2,Glyma.01G131400.1	Zm00001e039335_T005,Zm00001e020888_T001,Zm00001e027136_T002,Zm00001e016806_T002	Zosma02g22040	GO:0042803, GO:0000003, GO:0005886	protein homodimerization activity, reproduction, plasma membrane
OG0000644	Wa8730a001g005950	AT3G10960.1	Ms06t158190.1,Ms10t281650.1	CKAN_00757700,CKAN_02140100,CKAN_01253300	COCNU_HT001RO01_16T005680,COCNU_HT001RO01_04T012760	lm5633.a03.2.g05240_p1	LOC_Os05g26840.1	Glyma.09G276800.1,Glyma.18G212500.1,Glyma.04G220800.1,Glyma.06G145100.1,Glyma.04G192500.1,Glyma.06G173300.1	Zm00001e031537_T001,Zm00001e011034_T001,Zm00001e021263_T001	Zosma01g19210	GO:1904823, GO:0015854, GO:0015853	purine nucleobase transmembrane transport, guanine transport, adenine transport
OG0000645	Wa8730a001g005960	AT2G40600.1	Ms02t041770.1	CKAN_00911200	COCNU_HT001RO01_16T005750,COCNU_HT001RO01_04T012700	lm5633.a03.2.g04950_p1	LOC_Os03g21830.1	.	Zm00001e001588_T001	Zosma02g05260	-	0
OG0000646	Wa8730a001g005970	AT3G10915.2,AT4G11220.1	Ms03t055170.1,Ms05t123600.1,Ms06t158250.1,Ms10t281590.1	CKAN_00911100	.	lm5633.a03.2.g04960_p1	LOC_Os05g24770.1,LOC_Os03g21840.1	Glyma.01G110500.1,Glyma.19G023300.3,Glyma.13G062400.2	Zm00001e038234_T002	Zosma03g14230,Zosma01g09420,Zosma01g40960	GO:0044432, GO:0005789, GO:0042175	obsolete endoplasmic reticulum part, endoplasmic reticulum membrane, nuclear outer membrane-endoplasmic reticulum membrane network
OG0000647	Wa8730a001g005980	AT5G01830.1	.	CKAN_01099500	.	lm5633.a03.2.g04970_p1	.	.	Zm00001e028839_T001	Zosma02g05420	GO:0051865, GO:0010200, GO:0042493	protein autoubiquitination, response to chitin, response to drug
OG0000648	Wa8730a001g005990	AT5G01850.1,AT5G40540.1	Ms04t096580.1,Ms10t273260.1,Ms02t034640.1	CKAN_00759400,CKAN_01333200,CKAN_00916200,CKAN_01965400	COCNU_HT001RO01_16T005650,COCNU_HT001RO01_04T012410,COCNU_HT001RO01_12T006330,COCNU_HT001RO01_04T004460	lm5633.a03.2.g05090_p1	LOC_Os03g21620.1,LOC_Os03g60150.1	Glyma.09G275900.1,Glyma.18G212800.1,Glyma.03G036000.1,Glyma.01G132300.2,Glyma.04G188200.1,Glyma.06G177700.1	Zm00001e009251_T001,Zm00001e006143_T001	Zosma02g22120,Zosma01g19250,Zosma06g21490	GO:0007154, GO:0035556, GO:0023052	cell communication, intracellular signal transduction, signaling
OG0000649	Wa8730a001g006000	AT3G10920.1,AT3G56350.1	Ms03t055190.1,Ms11t319790.1,Ms08t227590.1,Ms02t041780.1,Ms03t064880.1	CKAN_00911000	COCNU_HT001RO01_16T005740	lm5633.a03.2.g05010_p1	LOC_Os05g25850.1	Glyma.04G221300.1,Glyma.06G144500.1	Zm00001e031374_T001,Zm00001e026865_T003	Zosma01g19290	GO:0009635, GO:0030145, GO:0004784	response to herbicide, manganese ion binding, superoxide dismutase activity
OG0000650	Wa8730a001g006010	AT3G56310.1	Ms06t158210.1,Ms08t231470.1,Ms02t034310.1	CKAN_02143400,CKAN_01329700,CKAN_01946000	COCNU_HT001RO01_16T005720	lm5633.a03.2.g05020_p1	LOC_Os07g48160.1	Glyma.09G273400.1,Glyma.18G215700.1,Glyma.06G144100.1,Glyma.03G002000.3,Glyma.16G220400.2	Zm00001e035853_T001	Zosma02g22130	GO:0005975, GO:0009505, GO:0004557	carbohydrate metabolic process, plant-type cell wall, alpha-galactosidase activity
OG0000651	Wa8730a001g006020	AT5G58350.1,AT3G51630.1	Ms05t146150.1,Ms06t171950.1,Ms04t096600.1,Ms07t201460.1,Ms11t316270.1,Ms02t035420.1	CKAN_00752700,CKAN_00910800,CKAN_00945000	COCNU_HT001RO01_12T006340,COCNU_HT001RO01_04T004430	lm5633.a03.2.g05140_p1	LOC_Os11g02300.1,LOC_Os12g02250.1,LOC_Os03g60150.1,LOC_Os02g45130.1	Glyma.09G276300.1,Glyma.11G159900.1,Glyma.18G215100.3,Glyma.02G235700.1,Glyma.18G054100.1,Glyma.14G203700.1,Glyma.03G036500.1,Glyma.01G132000.1,Glyma.04G188800.1,Glyma.06G176800.1	Zm00001e023970_T004,Zm00001e015406_T004	Zosma02g22120,Zosma01g19250,Zosma06g23130,Zosma05g24860	GO:0043424, GO:0010228, GO:0004674	protein histidine kinase binding, vegetative to reproductive phase transition of meristem, protein serine/threonine kinase activity
OG0000652	Wa8730a001g006030	AT5G58360.1,AT5G01840.1,AT1G06920.1,AT2G30400.1	Ms05t146140.1,Ms03t055200.1,Ms11t319900.1,Ms10t273240.1,Ms04t090910.1	CKAN_00758900,CKAN_00910600	COCNU_HT001RO01_16T005710,COCNU_HT001RO01_04T012820,COCNU_HT001RO01_04T004410	lm5633.a03.8.g08510_p1	LOC_Os05g25910.1,LOC_Os03g21870.1,LOC_Os07g48150.1,LOC_Os01g60810.1,LOC_Os05g39950.1	Glyma.09G276400.1,Glyma.11G159800.1,Glyma.18G215300.2,Glyma.02G235600.1,Glyma.18G054200.1,Glyma.14G203600.1,Glyma.03G036600.1,Glyma.01G131900.1	Zm00001e019432_T001,Zm00001e031917_T001,Zm00001e026867_T001,Zm00001e028843_T001,Zm00001e016408_T001	Zosma02g22100,Zosma01g19230,Zosma03g14190	GO:0051510, GO:0045892, GO:2000652	regulation of unidimensional cell growth, negative regulation of transcription, DNA-templated, regulation of secondary cell wall biogenesis
OG0000653	Wa8730a001g006040	AT3G10970.1	Ms10t274490.1	CKAN_00758100	COCNU_HT001RO01_04T012790	lm5633.a03.2.g05210_p1	LOC_Os05g07632.1	Glyma.18G021400.1,Glyma.11G235500.1	Zm00001e031078_T002	Zosma03g14180	GO:0006301, GO:0042555, -	postreplication repair, MCM complex, 0
OG0000654	Wa8730a001g006050	AT5G58370.2	Ms07t201510.1	CKAN_00732500	COCNU_HT001RO01_04T004310	lm5633.a03.2.g05220_p1	LOC_Os03g60180.1	Glyma.11G160900.1,Glyma.18G054700.2	Zm00001e006147_T001	Zosma06g27170	-	0
OG0000655	Wa8730a001g006060	AT3G10960.1	Ms06t158190.1,Ms10t281650.1	CKAN_00757700,CKAN_02140100,CKAN_01253300	COCNU_HT001RO01_16T005680,COCNU_HT001RO01_04T012760	lm5633.a03.2.g05240_p1	LOC_Os05g26840.1	Glyma.09G276800.1,Glyma.18G212500.1,Glyma.04G220800.1,Glyma.06G145100.1,Glyma.04G192500.1,Glyma.06G173300.1	Zm00001e031537_T001,Zm00001e011034_T001,Zm00001e021263_T001	Zosma01g19210	GO:1904823, GO:0015854, GO:0015853	purine nucleobase transmembrane transport, guanine transport, adenine transport
OG0000656	Wa8730a001g006070	AT3G10940.1	Ms04t078090.1	CKAN_00989600	COCNU_HT001RO01_12T006430,COCNU_HT001RO01_04T004290	lm5633.a03.2.g05260_p1	LOC_Os11g02180.1,LOC_Os12g02120.2	Glyma.04G220900.2,Glyma.06G145000.2	Zm00001e020887_T001	.	GO:0001871, GO:2001070, GO:0046838	obsolete pattern binding, starch binding, phosphorylated carbohydrate dephosphorylation
OG0000657	Wa8730a001g006080	AT5G01790.1,AT1G06930.1,AT2G40475.1,AT3G56260.2	Ms05t144560.1,Ms09t256330.1,Ms06t174780.1,Ms08t227530.1	CKAN_00757100,CKAN_00989800	COCNU_HT001RO01_16T005890,COCNU_HT001RO01_04T012840,COCNU_HT001RO01_04T004250	lm5633.a03.2.g05290_p1,lm5633.a03.15.g03620_p1	LOC_Os05g27000.1,LOC_Os05g07280.1,LOC_Os01g07240.1	Glyma.09G277500.1,Glyma.18G211300.1,Glyma.02G234700.1,Glyma.18G021200.1,Glyma.11G235700.1,Glyma.03G037600.1,Glyma.01G131200.1,Glyma.14G053500.1,Glyma.02G259200.1	Zm00001e025851_T001,Zm00001e033152_T001,Zm00001e027137_T002,Zm00001e031081_T001	Zosma02g22010,Zosma06g27160,Zosma02g05270	GO:0009982, -, GO:0031119	pseudouridine synthase activity, 0, tRNA pseudouridine synthesis
OG0000658	Wa8730a001g006090	AT2G40435.1,AT3G56220.1	Ms05t144580.1,Ms06t174790.1,Ms11t319920.1,Ms10t281660.1	CKAN_00756500,CKAN_00991900	COCNU_HT001RO01_16T005940,COCNU_HT001RO01_04T012940,COCNU_HT001RO01_12T006380,COCNU_HT001RO01_04T004180	lm5633.a03.11.g02210_p1	LOC_Os11g02054.1,LOC_Os05g27090.1,LOC_Os12g02020.1,LOC_Os03g21970.1,LOC_Os07g47960.1	Glyma.09G278100.1,Glyma.11G162500.1,Glyma.18G210700.1,Glyma.02G233300.2,Glyma.18G055800.2,Glyma.18G022200.1,Glyma.11G234800.1,Glyma.14G201300.1,Glyma.03G040500.1,Glyma.01G129700.1,Glyma.14G053900.1,Glyma.02G259800.1	Zm00001e001597_T001,Zm00001e031535_T001,Zm00001e038231_T001	Zosma02g21960,Zosma03g14120	-	0
OG0000659	Wa8730a001g006100	AT1G07030.1,AT5G17400.1	Ms01t020700.1,Ms06t177890.1,Ms03t064850.1,Ms10t281750.1	CKAN_00998000,CKAN_02452000	COCNU_HT001RO01_16T006180,COCNU_HT001RO01_04T013410,COCNU_HT001RO01_12T006490,COCNU_HT001RO01_04T004140	lm5633.a03.2.g05400_p1	LOC_Os03g07890.1	Glyma.03G256100.1,Glyma.01G110400.1,Glyma.19G033300.1,Glyma.13G053400.1	Zm00001e014381_T001	Zosma01g19170,Zosma01g40950	GO:0005739, GO:0015866, GO:0044425	mitochondrion, ADP transport, obsolete membrane part
OG0000660	Wa8730a001g006110	AT2G30280.1	Ms07t201560.1	CKAN_00889700	COCNU_HT001RO01_04T004130	lm5633.a03.2.g05390_p1	LOC_Os11g01880.1,LOC_Os12g01940.1	Glyma.19G024000.1	Zm00001e039184_T003	.	GO:0051276, GO:0006306, GO:0006342	chromosome organization, DNA methylation, chromatin silencing
OG0000661	Wa8730a001g006120	AT2G38400.1,AT3G08860.1	Ms09t243690.1,Ms06t174800.1,Ms11t320910.1,Ms05t124450.1,Ms08t221220.1,Ms10t287260.1	CKAN_00756100,CKAN_00992100,CKAN_00697300	COCNU_HT001RO01_16T006560,COCNU_HT001RO01_04T012960,COCNU_HT001RO01_04T004120	lm5633.a03.2.g05380_p1,lm5633.a03.11.g02470_p1	LOC_Os03g21960.1,LOC_Os05g39770.1,LOC_Os03g07570.4	Glyma.09G278300.2,Glyma.18G210500.1,Glyma.18G021001.1,Glyma.11G236200.1,Glyma.03G040600.4,Glyma.01G129400.1	Zm00001e001599_T001,Zm00001e031903_T001	Zosma01g17640	GO:0050662, GO:0043562, GO:0005739	obsolete coenzyme binding, cellular response to nitrogen levels, mitochondrion
OG0000662	Wa8730a001g006130	AT2G38400.1,AT3G08860.1	Ms09t243690.1,Ms06t174800.1,Ms11t320910.1,Ms05t124450.1,Ms08t221220.1,Ms10t287260.1	CKAN_00756100,CKAN_00992100,CKAN_00697300	COCNU_HT001RO01_16T006560,COCNU_HT001RO01_04T012960,COCNU_HT001RO01_04T004120	lm5633.a03.2.g05380_p1,lm5633.a03.11.g02470_p1	LOC_Os03g21960.1,LOC_Os05g39770.1,LOC_Os03g07570.1	Glyma.09G278300.2,Glyma.18G210500.1,Glyma.18G021001.1,Glyma.11G236200.1,Glyma.03G040600.4,Glyma.01G129400.1	Zm00001e001599_T001,Zm00001e031903_T001	Zosma01g17640	GO:0050662, GO:0043562, GO:0005739	obsolete coenzyme binding, cellular response to nitrogen levels, mitochondrion
OG0000663	Wa8730a001g006140	AT5G01760.1,AT2G38410.1,AT3G08790.1	Ms03t055250.1,Ms09t256360.1,Ms05t129710.1,Ms02t042770.1	CKAN_00755700,CKAN_02138600	COCNU_HT001RO01_04T012980,COCNU_HT001RO01_04T004070,COCNU_HT001RO01_06T005430	lm5633.a03.2.g05340_p1	LOC_Os05g27320.1,LOC_Os01g61030.1,LOC_Os05g39760.1	Glyma.09G278600.7,Glyma.18G210100.1	Zm00001e031531_T002,Zm00001e019421_T002,Zm00001e031902_T001,Zm00001e011075_T001,Zm00001e026110_T002,Zm00001e016401_T001	Zosma02g21950,Zosma01g19140	GO:0043162, GO:0019901, GO:0005769	ubiquitin-dependent protein catabolic process via the multivesicular body sorting pathway, protein kinase binding, early endosome
OG0000664	Wa8730a001g006150	AT5G01770.3,AT3G08850.1	Ms05t129720.1,Ms10t273210.1	CKAN_00755900	COCNU_HT001RO01_12T006510,COCNU_HT001RO01_04T004100	lm5633.a03.2.g05350_p1	LOC_Os11g01872.1,LOC_Os12g01922.1	Glyma.09G278500.1,Glyma.18G210300.1	Zm00001e023957_T004,Zm00001e009269_T001,Zm00001e039181_T002	Zosma01g19160,Zosma06g22020	GO:0030307, GO:0010154, GO:0061458	positive regulation of cell growth, fruit development, reproductive system development
OG0000665	Wa8730a001g006160	.	.	.	.	.	.	.	.	.
OG0000666	Wa8730a001g006170	.	Ms05t146070.1,Ms02t041810.1	CKAN_00754400	COCNU_HT001RO01_04T004060	.	.	Glyma.02G233000.2,Glyma.14G200600.4	.	.	GO:0009751, GO:0005886, GO:0071944	response to salicylic acid, plasma membrane, cell periphery
OG0000667	Wa8730a001g006180	.	.	.	.	.	.	.	.	.
OG0000668	Wa8730a001g006190	AT5G05350.1,AT3G10980.1	Ms05t144600.1,Ms11t320990.1,Ms08t227520.1,Ms06t147210.1,Ms10t273200.1,Ms07t201580.1,Ms11t316210.1	CKAN_00992900,CKAN_02138800	COCNU_HT001RO01_04T013030,COCNU_HT001RO01_04T004030	lm5633.a03.2.g05490_p1,lm5633.a03.8.g08790_p1	LOC_Os11g01842.1,LOC_Os05g27570.1,LOC_Os12g01900.1,LOC_Os01g61060.1,LOC_Os05g39730.1,LOC_Os03g18790.1	Glyma.18G022600.3,Glyma.11G234400.1,Glyma.03G041200.1,Glyma.02G260500.1	Zm00001e031523_T001,Zm00001e019420_T001,Zm00001e023930_T001,Zm00001e001363_T001,Zm00001e027294_T001,Zm00001e039179_T001	Zosma02g21920,Zosma06g21250	-	0
OG0000669	Wa8730a001g006200	AT5G57250.1,AT5G39980.1,AT2G02150.1,AT5G02860.1,AT3G09650.1	Ms09t256390.1,Ms05t124370.1,Ms08t208590.1,Ms03t075270.1,Ms10t297110.1,Ms01t008260.1	CKAN_01549400,CKAN_01966700,CKAN_00190200,CKAN_00888300	COCNU_HT001RO01_12T006580,COCNU_HT001RO01_04T003900,COCNU_HT001RO01_01T001340	lm5633.a03.2.g05520_p1	LOC_Os05g28720.1	Glyma.18G262450.1	Zm00001e031478_T001,Zm00001e019387_T001,Zm00001e026896_T001	Zosma06g27400,Zosma01g36300,Zosma05g05420	GO:0009451, GO:0090305, GO:0004519	RNA modification, nucleic acid phosphodiester bond hydrolysis, endonuclease activity
OG0000670	Wa8730a001g006210	AT1G06960.1,AT2G30260.1	Ms03t055270.1,Ms10t271670.1	CKAN_00993400	COCNU_HT001RO01_04T013050,COCNU_HT001RO01_01T001680	lm5633.a03.2.g05530_p1	LOC_Os03g18720.2	Glyma.02G232800.1,Glyma.14G200400.1,Glyma.03G253300.1,Glyma.19G250800.1	Zm00001e038386_T002,Zm00001e001359_T001,Zm00001e031154_T001	Zosma01g17690,Zosma01g28140	GO:0005730, GO:0000245, GO:0000354	nucleolus, spliceosomal complex assembly, cis assembly of pre-catalytic spliceosome
OG0000671	Wa8730a001g006220	AT5G01730.1,AT2G38440.1	Ms05t146060.1,Ms09t243880.1,Ms06t174880.1,Ms08t226500.1,Ms05t129700.1	CKAN_00753900,CKAN_00993500,CKAN_02571700,CKAN_01828900	COCNU_HT001RO01_03T013670,COCNU_HT001RO01_12T006560,COCNU_HT001RO01_04T003990	lm5633.a03.2.g05540_p1	LOC_Os07g49140.1,LOC_Os03g18710.1,LOC_Os03g60240.1	Glyma.09G279900.1,Glyma.18G209100.1,Glyma.03G041600.1,Glyma.01G128700.3	Zm00001e038387_T001,Zm00001e001358_T002,Zm00001e006149_T001,Zm00001e026027_T003,Zm00001e035934_T001	Zosma02g21910,Zosma06g30750,Zosma05g25920	GO:0005856, GO:0010090, GO:0090626	cytoskeleton, trichome morphogenesis, plant epidermis morphogenesis
OG0000672	Wa8730a001g006230	AT5G57170.1,AT5G01640.1,AT5G05380.2,AT2G38360.1,AT3G51660.1,AT2G40380.1,AT3G56110.2	Ms03t055330.1,Ms05t123460.1,Ms04t096640.1,Ms07t201620.1,Ms02t041860.1,Ms10t296690.1	CKAN_00749400,CKAN_00994400	COCNU_HT001RO01_16T006080,COCNU_HT001RO01_04T013230,COCNU_HT001RO01_12T006610,COCNU_HT001RO01_04T003840	lm5633.a03.2.g05700_p1,lm5633.a03.11.g02340_p1	LOC_Os11g01610.1,LOC_Os12g01690.1,LOC_Os01g61170.1,LOC_Os05g39670.1	Glyma.18G207300.1,Glyma.07G156500.1,Glyma.01G125900.1,Glyma.14G055500.1,Glyma.02G261100.1	Zm00001e019411_T001,Zm00001e031897_T003,Zm00001e023951_T001,Zm00001e027291_T002	Zosma01g17790,Zosma03g13530	GO:0005768, GO:0044422, GO:0044446	endosome, obsolete organelle part, obsolete intracellular organelle part
OG0000673	Wa8730a001g006240	.	Ms09t256400.1	.	COCNU_HT001RO01_16T006000	lm5633.a03.2.g05590_p1	.	Glyma.02G260800.1	.	Zosma01g19080	-	0
OG0000674	Wa8730a001g006250	AT2G38470.1,AT2G30250.1,AT2G03340.1	Ms03t055280.1,Ms06t174900.1,Ms06t147210.1,Ms08t208250.1,Ms11t316190.1,Ms04t090870.1,Ms03t075520.1	CKAN_00751700,CKAN_00993900,CKAN_02441200	COCNU_HT001RO01_16T005990,COCNU_HT001RO01_04T013130,COCNU_HT001RO01_12T006560,COCNU_HT001RO01_04T003930	lm5633.a03.2.g05580_p1,lm5633.a03.15.g03530_p1,lm5633.a03.8.g08850_p1	LOC_Os05g27730.1,LOC_Os01g61080.1,LOC_Os05g39720.1	Glyma.09G280200.1,Glyma.11G163300.1,Glyma.18G208800.2,Glyma.02G232600.1,Glyma.18G056600.1,Glyma.14G200200.1,Glyma.03G042700.1,Glyma.01G128100.2,Glyma.18G263400.1	Zm00001e031518_T001,Zm00001e019418_T001,Zm00001e031901_T001,Zm00001e029445_T001,Zm00001e028832_T001,Zm00001e027140_T002,Zm00001e010647_T001	Zosma01g18750,Zosma03g12880,Zosma06g26970,Zosma06g22960,Zosma02g07340	GO:0050832, GO:0009409, GO:0042742	defense response to fungus, response to cold, defense response to bacterium
OG0000675	Wa8730a001g006260	AT5G01720.1	Ms07t201600.1,Ms10t296680.1	CKAN_00751800,CKAN_02460500	COCNU_HT001RO01_04T003940,COCNU_HT001RO01_01T002030	lm5633.a03.2.g05570_p1	LOC_Os11g01780.1,LOC_Os12g01760.1	Glyma.02G232700.1,Glyma.14G200300.1,Glyma.03G042600.1,Glyma.01G128200.1	Zm00001e011072_T001,Zm00001e009276_T001,Zm00001e020828_T001	Zosma01g17700	-	0
OG0000676	Wa8730a001g006270	AT5G05360.1,AT2G38450.1	Ms05t144610.1,Ms09t243870.1,Ms06t174890.1,Ms10t281700.1	CKAN_00753500,CKAN_00993600	COCNU_HT001RO01_16T005980,COCNU_HT001RO01_04T013100	lm5633.a03.2.g05560_p1,lm5633.a03.15.g03550_p1	LOC_Os05g27660.1,LOC_Os03g18700.1	Glyma.09G280000.1,Glyma.18G209000.11,Glyma.18G022800.1,Glyma.11G234200.1,Glyma.03G041800.7,Glyma.01G128500.1	Zm00001e031521_T001,Zm00001e001357_T001,Zm00001e027141_T001	Zosma03g13480	-	0
OG0000677	Wa8730a001g006280	AT5G01640.1,AT5G05380.1,AT2G38360.1,AT2G40380.1,AT3G56110.1	Ms03t055330.1,Ms05t123460.1,Ms04t096640.1,Ms07t201620.1,Ms10t296690.1	CKAN_00749400,CKAN_00994400	COCNU_HT001RO01_16T006080,COCNU_HT001RO01_04T013230,COCNU_HT001RO01_12T006610,COCNU_HT001RO01_04T003840	lm5633.a03.2.g05700_p1,lm5633.a03.11.g02340_p1	LOC_Os11g01610.1,LOC_Os12g01690.1,LOC_Os01g61170.1,LOC_Os05g39670.1	Glyma.01G125900.1,Glyma.14G055500.1,Glyma.02G261100.1	Zm00001e019411_T001,Zm00001e031897_T001,Zm00001e023951_T001,Zm00001e027291_T001	Zosma01g17790,Zosma03g13530	GO:0005783, GO:0044446, GO:0005768	endoplasmic reticulum, obsolete intracellular organelle part, endosome
OG0000678	Wa8730a001g006290	AT5G58440.1	Ms03t055320.1,Ms08t227500.1,Ms10t274450.1,Ms11t306400.1	CKAN_00749100,CKAN_00994600	COCNU_HT001RO01_16T006060,COCNU_HT001RO01_04T013220,COCNU_HT001RO01_12T006600	lm5633.a03.2.g05690_p1	LOC_Os05g27920.1,LOC_Os01g61150.1,LOC_Os05g39680.1	Glyma.02G231800.1,Glyma.14G199000.2,Glyma.14G056000.1,Glyma.02G261500.1	Zm00001e031504_T001,Zm00001e019413_T002,Zm00001e031899_T003,Zm00001e027292_T002	Zosma01g17780,Zosma03g13520,Zosma06g21230	GO:0016050, GO:0044440, GO:0005829	vesicle organization, obsolete endosomal part, cytosol
OG0000679	Wa8730a001g006300	AT5G01700.2	Ms11t320260.1,Ms07t201610.1	CKAN_00751300,CKAN_01329300,CKAN_02441500	COCNU_HT001RO01_12T006570,COCNU_HT001RO01_04T003920	lm5633.a03.2.g05610_p1	LOC_Os11g01790.1,LOC_Os12g01770.1	Glyma.09G280700.1,Glyma.18G208100.1,Glyma.03G044100.3	Zm00001e009275_T001,Zm00001e014454_T002	.	GO:0004722, GO:0006470, -	protein serine/threonine phosphatase activity, protein dephosphorylation, 0
OG0000680	Wa8730a001g006310	AT5G34930.2	Ms06t177480.1	CKAN_00751100,CKAN_02572500	COCNU_HT001RO01_16T006030	lm5633.a03.2.g05660_p1	.	Glyma.18G023100.1,Glyma.11G233900.1,Glyma.05G014000.1,Glyma.02G260900.1,Glyma.13G055500.1	.	.	GO:0006571, GO:0008977, -	tyrosine biosynthetic process, prephenate dehydrogenase (NAD+) activity, 0
OG0000681	Wa8730a001g006320	AT2G37860.3,AT2G40400.2,AT3G56140.3	Ms01t020720.1,Ms06t177900.1	CKAN_00994200	COCNU_HT001RO01_04T003880	lm5633.a03.2.g05650_p1	LOC_Os01g61120.1,LOC_Os05g39680.1	Glyma.18G023200.1,Glyma.11G233800.1	Zm00001e019415_T003,Zm00001e027293_T001	Zosma01g19030	GO:0051186, GO:0015995, GO:0051188	obsolete cofactor metabolic process, chlorophyll biosynthetic process, obsolete cofactor biosynthetic process
OG0000682	Wa8730a001g006330	AT3G51670.1	Ms03t055290.1,Ms09t256410.1,Ms05t123470.1,Ms02t041850.1	CKAN_00751000	COCNU_HT001RO01_16T006040,COCNU_HT001RO01_04T013170	lm5633.a03.2.g05670_p1,lm5633.a03.8.g08970_p1	LOC_Os05g27820.1	Glyma.18G207900.1,Glyma.03G044200.1,Glyma.01G127500.1	Zm00001e031502_T004,Zm00001e026912_T001	Zosma03g13510	-, GO:0005886, GO:0071944	0, plasma membrane, cell periphery
OG0000683	Wa8730a001g006340	AT3G08780.1	Ms05t129680.1	CKAN_00995600	.	lm5633.a03.2.g05680_p1	.	Glyma.01G125600.2	.	Zosma01g17730	GO:0045893, GO:0001067, GO:0044212	positive regulation of transcription, DNA-templated, regulatory region nucleic acid binding, transcription regulatory region sequence-specific DNA binding
OG0000684	Wa8730a001g006350	AT2G38330.1,AT3G08040.1	Ms11t316180.1,Ms03t075460.1	CKAN_00996000	COCNU_HT001RO01_04T003800	lm5633.a03.2.g05720_p1	LOC_Os12g01580.1,LOC_Os09g37610.1	Glyma.18G206500.1,Glyma.07G156100.1	Zm00001e009286_T004	Zosma06g22550	GO:0015746, GO:0042895, GO:0015137	citrate transport, obsolete antibiotic transmembrane transporter activity, citrate transmembrane transporter activity
OG0000685	Wa8730a001g006360	.	.	.	.	.	.	.	.	Zosma05g05120	GO:0003721, GO:0000333, GO:0003720	telomerase RNA reverse transcriptase activity, telomerase catalytic core complex, telomerase activity
OG0000686	Wa8730a001g006370	AT5G01630.1	Ms05t144660.1	CKAN_00996200	COCNU_HT001RO01_16T006140	.	LOC_Os01g07110.1	.	.	Zosma02g21850	GO:0043966, GO:0045931, GO:0005813	histone H3 acetylation, positive regulation of mitotic cell cycle, centrosome
OG0000687	Wa8730a001g006380	AT5G58490.1,AT2G02400.1	Ms04t096690.1,Ms08t207990.1,Ms04t093110.1,Ms11t306330.1	CKAN_00999300,CKAN_01935700,CKAN_00939200	COCNU_HT001RO01_12T006470,COCNU_HT001RO01_04T003660	lm5633.a03.2.g05830_p1	LOC_Os01g61230.1,LOC_Os03g60380.1	Glyma.11G164700.1,Glyma.02G230500.1,Glyma.18G057900.1,Glyma.07G157200.1,Glyma.14G197600.4	Zm00001e019406_T001	Zosma03g12930,Zosma04g25550	GO:0009964, -, GO:0033729	negative regulation of flavonoid biosynthetic process, 0, anthocyanidin reductase activity
OG0000688	Wa8730a001g006390	AT5G01600.1,AT2G40300.1,AT3G11050.1,AT3G56090.1	Ms05t146000.1,Ms09t243800.1,Ms11t320020.1,Ms06t147230.1,Ms11t306410.1	CKAN_00746400,CKAN_00998800,CKAN_02137500	COCNU_HT001RO01_04T013460,COCNU_HT001RO01_12T006440,COCNU_HT001RO01_04T003670	lm5633.a03.2.g05850_p1	LOC_Os11g01530.1,LOC_Os12g01530.2	Glyma.18G205800.1,Glyma.02G230432.1,Glyma.07G155200.1,Glyma.18G024600.1,Glyma.11G232600.1,Glyma.14G197500.1,Glyma.03G050100.1,Glyma.01G124500.1,Glyma.14G056800.1,Glyma.02G262500.2	Zm00001e023946_T001,Zm00001e039172_T003	Zosma02g21810,Zosma01g20900	GO:0009908, GO:0030001, GO:0044444	flower development, metal ion transport, obsolete cytoplasmic part
OG0000689	Wa8730a001g006400	AT5G63220.1	Ms03t055360.1,Ms09t256500.1	CKAN_00748300	COCNU_HT001RO01_16T006160	lm5633.a03.2.g05770_p1	LOC_Os01g07100.1	Glyma.20G177500.1,Glyma.10G214100.1	Zm00001e025838_T004,Zm00001e016820_T002	Zosma01g17890,Zosma06g21210	-	0
OG0000690	Wa8730a001g006410	AT5G05440.1,AT2G38310.1,AT2G40330.1	Ms05t146030.1,Ms03t055350.1,Ms09t243840.1,Ms09t256480.1,Ms06t174970.1,Ms11t319990.1,Ms08t227470.1,Ms05t129300.1,Ms04t097080.1,Ms10t274440.1,Ms02t042850.1,Ms04t092100.1	CKAN_00748500,CKAN_00997100,CKAN_01146300,CKAN_02249900,CKAN_00187700,CKAN_02571000,CKAN_00889600	COCNU_HT001RO01_16T006150,COCNU_HT001RO01_03T012940,COCNU_HT001RO01_12T006660,COCNU_HT001RO01_04T003740,COCNU_HT001RO01_14T001660,COCNU_HT001RO01_06T005650	lm5633.a03.2.g05800_p1	LOC_Os01g61210.1,LOC_Os05g39580.1,LOC_Os03g18600.1	Glyma.13G229300.2,Glyma.18G206000.1,Glyma.07G155500.1,Glyma.18G023966.2,Glyma.11G233300.1,Glyma.01G124700.1,Glyma.14G056300.1,Glyma.02G261900.1,Glyma.15G083200.1	Zm00001e038390_T001,Zm00001e019407_T004,Zm00001e031249_T001,Zm00001e031882_T001,Zm00001e001351_T001,Zm00001e028827_T001,Zm00001e014435_T001,Zm00001e027174_T001	Zosma01g17830,Zosma06g21220,Zosma04g25480	GO:0010427, GO:1905183, GO:0007154	abscisic acid binding, negative regulation of protein serine/threonine phosphatase activity, cell communication
OG0000691	Wa8730a001g006420	AT5G01620.1,AT2G38320.1,AT2G40320.1,AT2G30010.1,AT3G11030.1,AT3G55990.1	Ms05t144810.1,Ms03t055340.1,Ms06t174730.1,Ms11t320000.1,Ms08t227430.1,Ms05t129580.1,Ms07t193470.1,Ms10t291130.1,Ms05t123350.1,Ms04t096660.1,Ms10t273390.1,Ms06t158120.1,Ms04t093300.1,Ms06t177920.1	CKAN_00748400,CKAN_00996800,CKAN_00557900,CKAN_02135100,CKAN_02573800,CKAN_01830000,CKAN_01538900	COCNU_HT001RO01_16T006550,COCNU_HT001RO01_04T013280,COCNU_HT001RO01_03T013350,COCNU_HT001RO01_04T003350,COCNU_HT001RO01_03T004340	lm5633.a03.2.g05750_p1,lm5633.a03.15.g03480_p1,lm5633.a03.8.g09100_p1	LOC_Os11g01570.1,LOC_Os05g28830.1,LOC_Os12g01560.1,LOC_Os07g49280.1,LOC_Os01g61460.1,LOC_Os05g39350.1,LOC_Os03g18120.1,LOC_Os03g60350.1	Glyma.13G230100.1,Glyma.18G206100.1,Glyma.07G155600.2,Glyma.18G024000.1,Glyma.11G233100.1,Glyma.03G049600.2,Glyma.01G125000.1,Glyma.14G058500.1,Glyma.02G262100.1	Zm00001e038413_T001,Zm00001e031480_T001,Zm00001e019393_T001,Zm00001e023948_T001,Zm00001e001317_T001,Zm00001e009300_T001,Zm00001e039173_T001,Zm00001e026898_T004,Zm00001e006156_T001,Zm00001e035942_T001	Zosma01g19010,Zosma03g12830,Zosma01g36700,Zosma01g20620,Zosma04g25620	GO:1990937, GO:0005794, GO:0050826	xylan acetylation, Golgi apparatus, response to freezing
OG0000692	Wa8730a001g006430	AT1G07010.1	Ms07t201650.1	CKAN_00996700	COCNU_HT001RO01_04T003780	.	.	Glyma.02G231100.1,Glyma.14G198700.1	.	Zosma02g21820	GO:0016311, GO:0030145, GO:0016791	dephosphorylation, manganese ion binding, phosphatase activity
OG0000693	Wa8730a001g006440	AT5G57625.1,AT4G30320.1,AT5G02730.1,AT3G09590.1,AT4G25790.1	.	CKAN_00371600,CKAN_00488100,CKAN_00228900	.	.	LOC_Os02g54540.1	Glyma.17G066000.1,Glyma.13G094200.1	Zm00001e016073_T001	Zosma05g25710	-	0
OG0000694	Wa8730a001g006450	AT2G38300.1,AT2G40260.1,AT2G02060.2,AT2G03500.1	Ms07t201690.1,Ms05t131650.1,Ms02t034620.1	CKAN_00748000,CKAN_01342900,CKAN_01960600,CKAN_02570600	COCNU_HT001RO01_16T006330,COCNU_HT001RO01_03T013740,COCNU_HT001RO01_04T003540,COCNU_HT001RO01_06T005630	lm5633.a03.2.g05980_p1	LOC_Os11g01480.1,LOC_Os12g01490.1,LOC_Os02g45080.1	Glyma.13G228900.4,Glyma.07G153900.3,Glyma.15G083600.1	Zm00001e030364_T002,Zm00001e009294_T001,Zm00001e030689_T002,Zm00001e014339_T001,Zm00001e015401_T001	Zosma06g28570	GO:0010452, GO:0006355, GO:0003700	histone H3-K36 methylation, regulation of transcription, DNA-templated, DNA-binding transcription factor activity
OG0000695	Wa8730a001g006460	AT2G30100.1	Ms06t175040.1	CKAN_00747900	COCNU_HT001RO01_16T006320	lm5633.a03.2.g05970_p1	LOC_Os05g28500.1	Glyma.11G167300.1,Glyma.18G059800.1	Zm00001e031517_T001	.	GO:0090305, GO:0004519, GO:0009451	nucleic acid phosphodiester bond hydrolysis, endonuclease activity, RNA modification
OG0000696	Wa8730a001g006470	AT5G57260.1,AT5G05260.2,AT2G24180.1,AT1G13110.1,AT4G13290.1	Ms03t055880.1,Ms09t256710.1,Ms06t172950.1,Ms08t226300.1,Ms08t231350.1,Ms06t150950.1,Ms11t310200.1,Ms07t198890.1	CKAN_02004900,CKAN_02139800,CKAN_01346200,CKAN_01954200,CKAN_02441800,CKAN_00029500,CKAN_00933000,CKAN_00226500,CKAN_01244700,CKAN_01877000	COCNU_HT001RO01_04T010500,COCNU_HT001RO01_03T004540	.	LOC_Os02g09200.1,LOC_Os07g11970.1,LOC_Os01g12770.1	Glyma.09G279100.1,Glyma.02G235300.1,Glyma.03G030600.1	Zm00001e037495_T001,Zm00001e010928_T001,Zm00001e030472_T001,Zm00001e038217_T002,Zm00001e026105_T001,Zm00001e016405_T001	Zosma01g20880	GO:0055114, GO:0009625, GO:0009684	obsolete oxidation-reduction process, response to insect, indoleacetic acid biosynthetic process
OG0000697	Wa8730a001g006480	AT5G57740.1,AT2G03430.1	Ms08t226270.1,Ms06t147340.1,Ms07t201680.1,Ms02t034990.1	CKAN_00747000	COCNU_HT001RO01_04T003570	lm5633.a03.2.g05950_p1	LOC_Os01g61330.1,LOC_Os02g09130.1,LOC_Os06g43680.1,LOC_Os02g54860.1	Glyma.13G091900.3,Glyma.02G263600.1	Zm00001e028823_T001	Zosma01g17940	GO:0045763, GO:0010366, GO:0032353	negative regulation of cellular amino acid metabolic process, negative regulation of ethylene biosynthetic process, negative regulation of hormone biosynthetic process
OG0000698	Wa8730a001g006490	AT5G58530.1,AT5G39865.1,AT2G41330.1,AT3G57070.1	Ms05t145960.1,Ms06t175020.1,Ms05t129630.1,Ms04t096710.1,Ms02t043260.1	CKAN_00747200,CKAN_01000200,CKAN_02578900,CKAN_01510600	COCNU_HT001RO01_16T006280,COCNU_HT001RO01_04T013580,COCNU_HT001RO01_04T003520	lm5633.a03.2.g05940_p1	LOC_Os05g28530.1,LOC_Os01g61350.1,LOC_Os05g39450.1	Glyma.11G166300.1,Glyma.02G229600.1,Glyma.18G059200.2,Glyma.18G025000.1,Glyma.11G232300.1,Glyma.14G196900.1,Glyma.14G057300.1,Glyma.02G263800.2,Glyma.03G129600.1	Zm00001e031513_T001,Zm00001e019401_T001,Zm00001e031894_T001,Zm00001e035770_T005,Zm00001e023894_T001,Zm00001e027282_T001,Zm00001e028821_T001,Zm00001e027223_T001	Zosma02g21790,Zosma01g18850,Zosma03g13680,Zosma01g20830	GO:0009863, GO:0005886, GO:0071944	salicylic acid mediated signaling pathway, plasma membrane, cell periphery
OG0000699	Wa8730a001g006500	AT5G58510.1,AT5G05520.1,AT3G11070.1	Ms05t129610.1,Ms04t096730.1	CKAN_00747700,CKAN_00999900	COCNU_HT001RO01_04T013600,COCNU_HT001RO01_04T003550	lm5633.a03.2.g05930_p1	LOC_Os11g01490.1,LOC_Os12g01500.1,LOC_Os05g39390.1,LOC_Os03g18440.1	Glyma.11G165900.2,Glyma.18G058700.1,Glyma.18G025400.1,Glyma.11G231800.1,Glyma.14G057500.1,Glyma.02G264000.1	Zm00001e038400_T001,Zm00001e023943_T001,Zm00001e027280_T001,Zm00001e039168_T002,Zm00001e028818_T001	Zosma01g17950,Zosma06g21160	GO:0006996, GO:0042407, -	organelle organization, cristae formation, 0
OG0000700	Wa8730a001g006510	AT5G58510.1	Ms03t055400.1	CKAN_00999900	COCNU_HT001RO01_04T013500	lm5633.a03.2.g05910_p1	LOC_Os03g18440.1	Glyma.11G165900.3,Glyma.18G058700.2	Zm00001e038400_T001	Zosma01g17910	-	0
OG0000701	Wa8730a001g006520	AT5G58510.1	Ms03t055400.1	CKAN_00999900	COCNU_HT001RO01_04T013500	lm5633.a03.2.g05880_p1	LOC_Os03g18440.1	Glyma.11G165900.2,Glyma.18G058700.1	Zm00001e038400_T001	Zosma01g17910	-	0
OG0000702	Wa8730a001g006530	AT5G58500.1,AT1G07090.1,AT5G28490.1,AT1G16910.1	Ms05t145990.1,Ms03t055390.1,Ms09t256550.1,Ms06t175000.1,Ms11t319100.1,Ms05t129880.1,Ms06t147240.1,Ms05t123440.1,Ms10t274430.1,Ms07t201660.1,Ms05t132130.1,Ms08t208310.1,Ms11t316160.1,Ms10t296700.1	CKAN_00746700,CKAN_00999800,CKAN_02571500,CKAN_01828500,CKAN_01538100	COCNU_HT001RO01_16T006220,COCNU_HT001RO01_04T013490,COCNU_HT001RO01_12T006460,COCNU_HT001RO01_04T003610	lm5633.a03.2.g05860_p1,lm5633.a03.15.g03410_p1	LOC_Os05g28040.1,LOC_Os01g61310.1,LOC_Os05g39500.1	Glyma.13G229700.1,Glyma.11G165700.1,Glyma.02G230200.6,Glyma.18G058600.1,Glyma.14G197300.1,Glyma.03G250900.1,Glyma.19G248300.1,Glyma.15G082800.1	Zm00001e031512_T001,Zm00001e019403_T001,Zm00001e031889_T001,Zm00001e030343_T001,Zm00001e027283_T001,Zm00001e028824_T001,Zm00001e013711_T001,Zm00001e027222_T001	Zosma02g21800,Zosma03g13640,Zosma05g26570,Zosma01g20890	GO:0010467, GO:0009299, GO:0090698	gene expression, mRNA transcription, post-embryonic plant morphogenesis
OG0000703	Wa8730a001g006540	AT3G56040.1	Ms08t221550.1	CKAN_02137100	.	lm5633.a03.2.g06000_p1	LOC_Os05g39230.1	Glyma.18G025500.1,Glyma.11G231700.1	Zm00001e027275_T002	Zosma01g17960	GO:0003983, GO:0046506, GO:0006011	UTP:glucose-1-phosphate uridylyltransferase activity, sulfolipid biosynthetic process, UDP-glucose metabolic process
OG0000704	Wa8730a001g006550	AT3G51780.1	.	CKAN_00745100	COCNU_HT001RO01_12T006700,COCNU_HT001RO01_04T003460	lm5633.a03.2.g06030_p1	LOC_Os01g61500.1	Glyma.02G229300.1,Glyma.07G153700.2,Glyma.03G051600.1,Glyma.01G123300.1	Zm00001e019391_T001,Zm00001e028812_T001	Zosma02g21760	GO:0009651, GO:0010228, GO:0009409	response to salt stress, vegetative to reproductive phase transition of meristem, response to cold
OG0000705	Wa8730a001g006560	AT2G30080.1,AT3G12750.1	Ms05t146020.1,Ms09t243740.1,Ms11t320010.1,Ms05t129640.1,Ms04t096670.1,Ms10t270750.1	CKAN_01002100,CKAN_01325800,CKAN_00194200	COCNU_HT001RO01_16T006380,COCNU_HT001RO01_04T003720	lm5633.a03.2.g06040_p1	LOC_Os05g39560.1,LOC_Os05g07210.1,LOC_Os07g12890.2	Glyma.11G169300.1,Glyma.18G060300.1,Glyma.14G196200.1	Zm00001e031884_T002	Zosma03g13760,Zosma01g21230,Zosma04g25490	GO:0005886, GO:0071944, GO:0005385	plasma membrane, cell periphery, zinc ion transmembrane transporter activity
OG0000706	Wa8730a001g006570	AT2G37970.1	Ms09t243050.1	.	.	.	.	Glyma.01G109500.1	.	.	GO:0043621, GO:0042793, GO:0042644	protein self-association, plastid transcription, chloroplast nucleoid
OG0000707	Wa8730a001g006580	AT5G01320.1	Ms05t144760.1,Ms03t055420.1,Ms01t020780.1,Ms11t320940.1,Ms05t123410.1,Ms04t092710.1	CKAN_00742500,CKAN_01001900,CKAN_02135600,CKAN_02575300	COCNU_HT001RO01_04T013670,COCNU_HT001RO01_12T006690,COCNU_HT001RO01_04T003400,COCNU_HT001RO01_14T001460	lm5633.a03.2.g06100_p1,lm5633.a03.15.g03290_p1,lm5633.a03.11.g01960_p1	LOC_Os07g49250.1,LOC_Os05g39310.1,LOC_Os03g18220.1,LOC_Os01g06660.1	Glyma.13G231700.1,Glyma.18G204200.1,Glyma.07G153100.1,Glyma.03G055100.1,Glyma.01G118000.1,Glyma.15G080800.1	Zm00001e001325_T003,Zm00001e027278_T002,Zm00001e025833_T001,Zm00001e035940_T001	Zosma02g21710	GO:0001666, GO:0016831, GO:0034059	response to hypoxia, carboxy-lyase activity, response to anoxia
OG0000708	Wa8730a001g006590	AT3G11460.1,AT5G39680.1	Ms01t021530.1,Ms06t172610.1,Ms05t129810.1,Ms07t193590.1,Ms10t290800.1,Ms06t147190.1,Ms05t132320.1,Ms08t208970.1,Ms05t139090.1,Ms08t221600.1,Ms10t297110.1	CKAN_00562200,CKAN_00914500,CKAN_01963700,CKAN_02451100,CKAN_00091100,CKAN_00493600,CKAN_01831000,CKAN_00025000,CKAN_00227600,CKAN_01236800	COCNU_HT001RO01_16T004850,COCNU_HT001RO01_12T006060,COCNU_HT001RO01_03T004300,COCNU_HT001RO01_14T000970	lm5633.a03.8.g03240_p1	LOC_Os03g52475.1,LOC_Os09g38310.1	Glyma.17G220100.1	Zm00001e013713_T001	Zosma03g13470	GO:0031053, GO:0031054, GO:0004525	primary miRNA processing, pre-miRNA processing, ribonuclease III activity
OG0000709	Wa8730a001g006600	.	Ms01t008320.1	.	.	lm5633.a03.2.g06090_p1	.	.	Zm00001e035810_T001,Zm00001e010932_T002	.	GO:0042623, GO:0042625, GO:0098660	ATPase activity, ATPase-coupled ion transmembrane transporter activity, inorganic ion transmembrane transport
OG0000710	Wa8730a001g006610	AT1G06840.1,AT2G24130.1,AT5G40170.1,AT2G01950.1,AT3G08680.1,AT4G13920.1,AT2G33050.1	Ms05t146180.1,Ms03t056130.1,Ms09t244030.1,Ms01t020390.1,Ms06t174680.1,Ms11t319980.1,Ms08t226690.1,Ms05t122370.1,Ms05t131880.1,Ms10t270900.1,Ms04t092430.1,Ms08t231450.1,Ms06t178170.1,Ms08t221900.1,Ms06t150870.1,Ms04t112740.1,Ms01t008650.1,Ms04t084800.1,Ms11t310270.1,Ms02t039660.1	CKAN_00743700,CKAN_00994500,CKAN_01144800,CKAN_02136000,CKAN_00373000,CKAN_02250300,CKAN_01958000,CKAN_00185200,CKAN_02579200,CKAN_01833800,CKAN_01515200,CKAN_00627200,CKAN_01657100,CKAN_00027400,CKAN_01539000,CKAN_00235000	COCNU_HT001RO01_16T006390,COCNU_HT001RO01_03T013760,COCNU_HT001RO01_12T006210,COCNU_HT001RO01_04T003510	lm5633.a03.2.g06070_p1	LOC_Os01g06520.1	Glyma.18G204400.1,Glyma.07G153500.1,Glyma.18G023500.1,Glyma.03G052400.1,Glyma.01G120000.1,Glyma.04G194400.2,Glyma.14G060300.1,Glyma.13G056200.1,Glyma.06G190000.1	Zm00001e001353_T001,Zm00001e025819_T001,Zm00001e014373_T002,Zm00001e016830_T001	Zosma02g21730,Zosma01g19390,Zosma06g26450,Zosma05g26660,Zosma03g02650,Zosma04g25890,Zosma02g07370,Zosma05g04990	GO:0005199, GO:0010073, GO:0009505	structural constituent of cell wall, meristem maintenance, plant-type cell wall
OG0000711	Wa8730a001g006620	AT5G05530.1,AT3G11110.1	Ms11t320040.1,Ms05t123690.1,Ms08t209130.1	CKAN_01002000,CKAN_00563200,CKAN_01938600,CKAN_00932400,CKAN_01877100	COCNU_HT001RO01_04T010430,COCNU_HT001RO01_04T003410	lm5633.a03.2.g06050_p1	LOC_Os01g61470.1,LOC_Os05g39260.1	Glyma.11G169500.1,Glyma.18G060400.1,Glyma.18G025700.1,Glyma.11G231400.1,Glyma.02G210700.1	Zm00001e031874_T001,Zm00001e027277_T001	Zosma02g21740,Zosma06g16980	GO:0061635, GO:0044257, GO:0061630	regulation of protein complex stability, cellular protein catabolic process, ubiquitin protein ligase activity
OG0000712	Wa8730a001g006630	.	Ms09t244090.1,Ms01t021290.1,Ms05t129600.1,Ms06t147360.1,Ms08t208060.1,Ms08t231380.1,Ms06t177420.1	CKAN_01508600	COCNU_HT001RO01_16T006420,COCNU_HT001RO01_04T013700,COCNU_HT001RO01_04T003380,COCNU_HT001RO01_11T010000	lm5633.a03.2.g06110_p1	LOC_Os11g01390.1,LOC_Os12g01400.1	Glyma.11G157100.1,Glyma.04G194800.1,Glyma.06G171150.1	.	Zosma03g13770,Zosma01g36630	GO:0046677, GO:0005509, GO:0010193	response to antibiotic, calcium ion binding, response to ozone
OG0000713	Wa8730a001g006640	AT2G30070.1,AT3G02050.1,AT4G13420.1	Ms11t321090.1,Ms05t123390.1,Ms07t201460.1,Ms08t208230.1	CKAN_00741900,CKAN_00555300,CKAN_02465200,CKAN_00497500	COCNU_HT001RO01_04T013710,COCNU_HT001RO01_11T008980	lm5633.a03.2.g06120_p1,lm5633.a03.11.g02190_p1	LOC_Os07g47350.2	Glyma.11G169900.1,Glyma.02G228500.1,Glyma.18G060801.1,Glyma.08G019600.1,Glyma.05G213100.1	Zm00001e035814_T003,Zm00001e030346_T001	Zosma02g21690,Zosma06g27210,Zosma06g16560	GO:0009674, GO:0071805, GO:0030001	potassium:sodium symporter activity, potassium ion transmembrane transport, metal ion transport
OG0000715	Wa8730a001g006650	AT3G11130.1,AT3G08530.1	Ms01t020790.1,Ms05t129590.1,Ms05t124410.1,Ms04t096810.1,Ms04t093310.1,Ms08t221540.1	CKAN_00741300,CKAN_01001300,CKAN_01829800	COCNU_HT001RO01_04T013770,COCNU_HT001RO01_12T006920,COCNU_HT001RO01_04T003360	lm5633.a03.2.g06140_p1,lm5633.a03.11.g01940_p1	LOC_Os11g01380.1,LOC_Os12g01390.1	Glyma.02G228400.1,Glyma.18G026000.1,Glyma.11G231100.1,Glyma.14G195400.1,Glyma.14G058300.1,Glyma.02G258200.1	Zm00001e023940_T002,Zm00001e009296_T003,Zm00001e020822_T001,Zm00001e039167_T001	Zosma02g21680,Zosma03g13790,Zosma02g07230	GO:0072583, GO:0098657, GO:0010118	clathrin-dependent endocytosis, import into cell, stomatal movement
OG0000716	Wa8730a001g006660	AT1G07150.1,AT2G30040.1,AT3G08730.1,AT2G32510.1	Ms05t144790.1,Ms09t243710.1,Ms08t227450.1,Ms07t193520.1,Ms10t289290.1,Ms06t157690.1,Ms05t139330.1	CKAN_01001200,CKAN_00372000,CKAN_00916200,CKAN_01940800,CKAN_01863100	COCNU_HT001RO01_16T006470,COCNU_HT001RO01_04T013770,COCNU_HT001RO01_12T006810,COCNU_HT001RO01_04T003100,COCNU_HT001RO01_11T008730	lm5633.a03.2.g06160_p1	LOC_Os03g18170.1	Glyma.11G169901.1,Glyma.02G228300.1,Glyma.18G060900.1,Glyma.14G195300.1,Glyma.01G125800.1,Glyma.14G055900.1,Glyma.02G261400.1	Zm00001e038410_T001,Zm00001e001321_T001,Zm00001e039190_T001	Zosma01g18520,Zosma03g13800,Zosma01g36650	GO:0042981, GO:0007154, GO:0032155	regulation of apoptotic process, cell communication, obsolete cell division site part
OG0000717	Wa8730a001g006670	AT5G01340.1	Ms06t172770.1,Ms07t193510.1,Ms10t291140.1,Ms06t178060.1	CKAN_01000800,CKAN_02497500,CKAN_02467600,CKAN_00087400	COCNU_HT001RO01_16T006480,COCNU_HT001RO01_04T013780	lm5633.a03.2.g06180_p1	LOC_Os05g28870.1,LOC_Os03g18160.1	Glyma.02G211700.3,Glyma.14G179300.1	Zm00001e038392_T001,Zm00001e001319_T001	Zosma01g19170,Zosma06g27130	GO:0006855, GO:0071422, GO:0044425	drug transmembrane transport, succinate transmembrane transport, obsolete membrane part
OG0000718	Wa8730a001g006680	AT3G51820.1	Ms10t281780.1	CKAN_00741100,CKAN_01000600	COCNU_HT001RO01_04T013810	.	LOC_Os05g28200.1	Glyma.18G203400.1,Glyma.07G152300.1	Zm00001e031487_T001	Zosma03g13850,Zosma01g36690	GO:0044435, GO:0009534, GO:0044434	obsolete plastid part, chloroplast thylakoid, obsolete chloroplast part
OG0000719	Wa8730a001g006690	AT1G07160.1,AT2G40180.1,AT2G30020.1	Ms07t193500.1,Ms05t123360.1,Ms06t157900.1,Ms02t042900.1,Ms09t263420.1,Ms06t151200.1	CKAN_00741200,CKAN_01339900,CKAN_02251400,CKAN_01937700,CKAN_02451600,CKAN_01514500	COCNU_HT001RO01_16T006510,COCNU_HT001RO01_04T013790,COCNU_HT001RO01_11T009670	lm5633.a03.2.g06190_p1,lm5633.a03.8.g04290_p1,lm5633.a03.12.g08120_p1	LOC_Os03g18150.1,LOC_Os03g59530.1,LOC_Os09g38550.1	Glyma.11G170200.1,Glyma.02G228200.1,Glyma.18G061000.1,Glyma.14G195200.1,Glyma.17G221100.1	Zm00001e038411_T001,Zm00001e001318_T001	Zosma02g21670,Zosma03g13840,Zosma06g28610,Zosma01g36660	GO:0009738, GO:0006470, GO:0004722	abscisic acid-activated signaling pathway, protein dephosphorylation, protein serine/threonine phosphatase activity
OG0000720	Wa8730a001g006700	AT5G58600.1,AT5G01360.2,AT2G38320.1,AT2G40150.1,AT3G11030.1,AT3G55990.1	Ms05t144810.1,Ms03t055340.1,Ms06t174730.1,Ms11t320920.1,Ms08t227430.1,Ms05t129580.1,Ms07t193480.1,Ms10t291130.1,Ms05t123350.1,Ms04t096820.1,Ms10t273390.1,Ms06t158120.1,Ms04t093300.1,Ms06t177920.1	CKAN_00739700,CKAN_01010600,CKAN_02135100,CKAN_01943500,CKAN_02573800,CKAN_01830000,CKAN_01228300	COCNU_HT001RO01_16T006540,COCNU_HT001RO01_04T013840,COCNU_HT001RO01_03T013350,COCNU_HT001RO01_04T003350	lm5633.a03.2.g06210_p1,lm5633.a03.15.g03480_p1	LOC_Os11g01370.1,LOC_Os05g28630.1,LOC_Os12g01380.1,LOC_Os07g49280.1,LOC_Os01g61460.1,LOC_Os05g39350.1,LOC_Os03g18140.1,LOC_Os03g60350.1	Glyma.13G230800.2,Glyma.18G206100.1,Glyma.07G152000.1,Glyma.18G026200.1,Glyma.11G233100.1,Glyma.03G056200.1,Glyma.01G125000.1,Glyma.14G058500.1,Glyma.02G258000.1,Glyma.15G081600.2	Zm00001e038413_T001,Zm00001e031480_T001,Zm00001e019393_T001,Zm00001e023925_T001,Zm00001e001317_T001,Zm00001e009300_T001,Zm00001e039166_T001,Zm00001e026898_T004,Zm00001e006156_T001,Zm00001e030698_T002,Zm00001e035942_T001	Zosma01g19090,Zosma03g12860,Zosma01g36700,Zosma01g20620,Zosma04g25620,Zosma02g07080	GO:0045492, GO:0050826, GO:1990538	xylan biosynthetic process, response to freezing, xylan O-acetyltransferase activity
OG0000721	Wa8730a001g006710	.	Ms06t150990.1	CKAN_00933600	COCNU_HT001RO01_11T008610	lm5633.a03.8.g05170_p1	.	.	.	Zosma06g26640	-	0
OG0000722	Wa8730a001g006720	AT5G05560.2	Ms08t227440.1	CKAN_00740700	COCNU_HT001RO01_04T013830	lm5633.a03.2.g06250_p1	.	Glyma.14G058400.2,Glyma.02G258100.1	Zm00001e031482_T002	Zosma04g25610	GO:0009553, GO:0035670, GO:0048481	embryo sac development, plant-type ovary development, plant ovule development
OG0000723	Wa8730a001g006730	AT5G05560.1	Ms08t227440.1	CKAN_00740700	.	lm5633.a03.2.g06260_p1	.	Glyma.14G058400.1,Glyma.02G258100.1	Zm00001e031482_T001	Zosma04g25610	GO:0009553, GO:0035670, GO:0048481	embryo sac development, plant-type ovary development, plant ovule development
OG0000724	Wa8730a001g006740	AT2G38280.1	Ms11t320930.1,Ms06t158060.1,Ms10t281790.1	CKAN_00740900,CKAN_00198300	COCNU_HT001RO01_16T006530,COCNU_HT001RO01_04T013820	lm5633.a03.2.g06300_p1	LOC_Os05g28180.1,LOC_Os07g49270.1	Glyma.01G119500.3	Zm00001e031485_T001,Zm00001e035941_T001	Zosma06g21140	GO:0009737, GO:0000003, GO:0009793	response to abscisic acid, reproduction, embryo development ending in seed dormancy
OG0000725	Wa8730a001g006750	AT2G38280.1	Ms11t320930.1,Ms06t158060.1,Ms10t281790.1	CKAN_00740900,CKAN_00198300	COCNU_HT001RO01_16T006530,COCNU_HT001RO01_04T013820	lm5633.a03.2.g06300_p1	LOC_Os05g28180.3,LOC_Os07g49270.1	.	Zm00001e031485_T001,Zm00001e035941_T001	Zosma06g21140	GO:0009737, GO:0000003, GO:0009793	response to abscisic acid, reproduction, embryo development ending in seed dormancy
OG0000726	Wa8730a001g006760	.	Ms05t144820.1,Ms09t243700.1	CKAN_00739600,CKAN_01010400,CKAN_02135000	COCNU_HT001RO01_04T013860,COCNU_HT001RO01_12T006910,COCNU_HT001RO01_04T003340	lm5633.a03.2.g06340_p1	LOC_Os03g18130.1	Glyma.11G170300.1,Glyma.02G228100.1,Glyma.18G061100.1,Glyma.18G017200.1,Glyma.11G240200.1,Glyma.14G195000.1	Zm00001e038412_T002,Zm00001e001316_T001,Zm00001e020821_T002	.	GO:0004066, GO:0009646, GO:0006529	asparagine synthase (glutamine-hydrolyzing) activity, response to absence of light, asparagine biosynthetic process
OG0000727	Wa8730a001g006770	.	Ms05t144820.1,Ms09t243700.1	CKAN_00739600,CKAN_01010400,CKAN_02135000	COCNU_HT001RO01_04T013860,COCNU_HT001RO01_12T006910,COCNU_HT001RO01_04T003340	lm5633.a03.2.g06340_p1	LOC_Os03g18130.1	Glyma.11G170300.1,Glyma.02G228100.1,Glyma.18G061100.1,Glyma.18G017200.1,Glyma.11G240200.1,Glyma.14G195000.1	Zm00001e038412_T002,Zm00001e001316_T001,Zm00001e020821_T002	.	GO:0004066, GO:0009646, GO:0006529	asparagine synthase (glutamine-hydrolyzing) activity, response to absence of light, asparagine biosynthetic process
OG0000728	Wa8730a001g006780	.	Ms05t144820.1,Ms09t243700.1	CKAN_00739600,CKAN_01010400,CKAN_02135000	.	lm5633.a03.2.g06310_p1	LOC_Os03g18130.1	Glyma.11G170300.1,Glyma.02G228100.1,Glyma.18G061100.1,Glyma.18G017200.1,Glyma.11G240200.1,Glyma.14G195000.1	Zm00001e038412_T001,Zm00001e001316_T001,Zm00001e020821_T001	.	GO:0004066, GO:0006529, GO:0009646	asparagine synthase (glutamine-hydrolyzing) activity, asparagine biosynthetic process, response to absence of light
OG0000729	Wa8730a001g006790	.	Ms05t144820.1,Ms09t243700.1	CKAN_00739600,CKAN_01010400,CKAN_02135000	COCNU_HT001RO01_04T013860,COCNU_HT001RO01_12T006910,COCNU_HT001RO01_04T003340	lm5633.a03.2.g06340_p1	LOC_Os03g18130.1	Glyma.11G170300.1,Glyma.02G228100.1,Glyma.18G061100.1,Glyma.18G017200.1,Glyma.11G240200.1,Glyma.14G195000.1	Zm00001e038412_T002,Zm00001e001316_T001,Zm00001e020821_T002	.	GO:0004066, GO:0009646, GO:0006529	asparagine synthase (glutamine-hydrolyzing) activity, response to absence of light, asparagine biosynthetic process
OG0000730	Wa8730a001g006800	AT3G51830.1	Ms03t055480.1,Ms09t256620.1,Ms06t158030.1,Ms10t281810.1	CKAN_01010200	COCNU_HT001RO01_04T013930	.	LOC_Os03g18080.2	Glyma.07G151700.1	Zm00001e038415_T001	Zosma02g21660	GO:0098827, GO:0043812, GO:0046856	endoplasmic reticulum subcompartment, phosphatidylinositol-4-phosphate phosphatase activity, phosphatidylinositol dephosphorylation
OG0000731	Wa8730a001g006810	AT3G51830.2	Ms06t158030.1,Ms10t281810.1	CKAN_01010200	COCNU_HT001RO01_04T013930	.	LOC_Os03g18080.1	Glyma.07G151700.1	Zm00001e038415_T001	Zosma02g21660	GO:0042175, GO:0098827, GO:0046856	nuclear outer membrane-endoplasmic reticulum membrane network, endoplasmic reticulum subcompartment, phosphatidylinositol dephosphorylation
OG0000732	Wa8730a001g006820	.	.	.	.	.	.	.	.	Zosma02g21660	GO:0005789, GO:0043812, GO:0046856	endoplasmic reticulum membrane, phosphatidylinositol-4-phosphate phosphatase activity, phosphatidylinositol dephosphorylation
OG0000733	Wa8730a001g006830	AT2G38270.1,AT5G40370.2	Ms05t129560.1	CKAN_02135400	COCNU_HT001RO01_04T003310	lm5633.a03.2.g06370_p1	.	Glyma.03G056300.1,Glyma.01G119900.1	Zm00001e009301_T001,Zm00001e020818_T001	Zosma01g36710	GO:0044434, GO:0006812, GO:0009570	obsolete chloroplast part, cation transport, chloroplast stroma
OG0000734	Wa8730a001g006840	AT3G51840.1	Ms08t227420.1	CKAN_01517600	COCNU_HT001RO01_16T006580,COCNU_HT001RO01_04T013910	lm5633.a03.2.g06390_p1	LOC_Os05g07090.1,LOC_Os01g06600.1	Glyma.18G202800.1,Glyma.07G151500.1,Glyma.03G056400.1	Zm00001e016838_T003,Zm00001e031090_T001	Zosma01g36730	GO:0009514, GO:0046459, GO:0003997	glyoxysome, short-chain fatty acid metabolic process, acyl-CoA oxidase activity
OG0000735	Wa8730a001g006850	AT1G07180.1,AT2G29990.1	Ms05t145040.1,Ms06t147260.1	CKAN_01327700	COCNU_HT001RO01_04T003280	lm5633.a03.2.g06460_p1	LOC_Os01g61410.1	Glyma.11G173700.1,Glyma.02G227700.12,Glyma.18G061700.1,Glyma.14G194600.1	Zm00001e028814_T001	Zosma02g21650	GO:0003959, GO:0031304, GO:0003954	NADPH dehydrogenase activity, intrinsic component of mitochondrial inner membrane, NADH dehydrogenase activity
OG0000736	Wa8730a001g006860	AT5G05570.1	Ms05t144870.1	.	COCNU_HT001RO01_04T013940	.	LOC_Os07g49300.1	Glyma.18G202700.1,Glyma.07G151400.1,Glyma.14G058652.1,Glyma.02G257800.1	Zm00001e035944_T001	Zosma02g21640	GO:0007409, GO:0000137, GO:0006893	axonogenesis, Golgi cis cisterna, Golgi to plasma membrane transport
OG0000737	Wa8730a001g006870	AT5G05570.2	Ms05t144870.1	.	COCNU_HT001RO01_04T013940	.	LOC_Os07g49300.1	Glyma.18G202700.1,Glyma.07G151400.1,Glyma.02G257800.2	Zm00001e038419_T001,Zm00001e035944_T002	Zosma02g21640	GO:0007409, GO:0000137, GO:0006893	axonogenesis, Golgi cis cisterna, Golgi to plasma membrane transport
OG0000738	Wa8730a001g006880	AT5G58640.1	Ms07t201720.1	CKAN_00736700	COCNU_HT001RO01_12T006870	lm5633.a03.2.g06420_p1	LOC_Os01g61580.3,LOC_Os05g39110.2	Glyma.02G227600.1,Glyma.14G194500.1,Glyma.03G056500.1	Zm00001e027272_T001,Zm00001e028810_T001	.	-	0
OG0000739	Wa8730a001g006890	AT5G05580.1,AT2G29980.1,AT3G11170.1	Ms05t145930.1,Ms09t243680.1,Ms11t320900.1,Ms08t227410.1,Ms05t129540.1,Ms10t273350.1,Ms08t209100.1	CKAN_00736500,CKAN_01005100	COCNU_HT001RO01_16T006590,COCNU_HT001RO01_04T013950,COCNU_HT001RO01_04T003240	lm5633.a03.2.g06580_p1	LOC_Os11g01340.3,LOC_Os12g01370.1,LOC_Os07g49310.1,LOC_Os03g18070.1	Glyma.11G174100.1,Glyma.18G202600.1,Glyma.02G227200.1,Glyma.18G062000.1,Glyma.07G151300.1,Glyma.14G194300.1,Glyma.03G056700.1,Glyma.01G120400.1	Zm00001e038420_T002,Zm00001e011022_T001,Zm00001e001309_T002,Zm00001e020817_T001	Zosma02g21630,Zosma06g27240,Zosma01g36740,Zosma05g17800	GO:0006636, GO:0042170, GO:0042389	unsaturated fatty acid biosynthetic process, plastid membrane, omega-3 fatty acid desaturase activity
OG0000740	Wa8730a001g006900	AT5G05580.1,AT2G29980.1,AT3G11170.1	Ms05t145930.1,Ms09t243680.1,Ms11t320900.1,Ms08t227410.1,Ms05t129540.1,Ms05t123340.1,Ms10t273350.1,Ms08t209100.1	CKAN_00736500,CKAN_01005100	COCNU_HT001RO01_16T006590,COCNU_HT001RO01_04T013950,COCNU_HT001RO01_04T003240,COCNU_HT001RO01_01T002280	lm5633.a03.2.g06580_p1	LOC_Os11g01340.3,LOC_Os12g01370.1,LOC_Os07g49310.1,LOC_Os03g18070.1	Glyma.11G174100.1,Glyma.18G202600.1,Glyma.02G227200.1,Glyma.18G062000.1,Glyma.07G151300.1,Glyma.14G194300.1,Glyma.03G056700.1,Glyma.01G120400.1	Zm00001e038420_T002,Zm00001e011022_T001,Zm00001e001309_T002,Zm00001e020817_T001	Zosma02g21630,Zosma01g18570,Zosma06g27240,Zosma01g36740,Zosma05g17800	GO:0006636, GO:0042170, GO:0042389	unsaturated fatty acid biosynthetic process, plastid membrane, omega-3 fatty acid desaturase activity
OG0000741	Wa8730a001g006910	AT2G02070.2,AT5G03150.1	Ms10t289400.1,Ms05t122480.1,Ms05t139160.1,Ms10t270770.1,Ms04t090930.1,Ms03t075620.1,Ms09t263200.1,Ms04t084620.1,Ms11t305600.1,Ms02t039840.1	CKAN_01343100,CKAN_02505100,CKAN_01960200,CKAN_00082000,CKAN_00497900,CKAN_00194500,CKAN_01540000,CKAN_01867700,CKAN_00660000	COCNU_HT001RO01_14T001020,COCNU_HT001RO01_01T002340,COCNU_HT001RO01_06T006290	lm5633.a03.2.g06560_p1,lm5633.a03.8.g03290_p1	LOC_Os09g38340.1,LOC_Os02g45054.1	Glyma.10G051500.7,Glyma.07G158200.1,Glyma.13G139000.1,Glyma.12G070300.1,Glyma.11G155677.1,Glyma.13G327500.4	Zm00001e026143_T001,Zm00001e010628_T003,Zm00001e015397_T003	Zosma02g21530,Zosma01g18460,Zosma06g26590,Zosma03g02540,Zosma02g17400,Zosma05g18050	GO:0003700, GO:0008356, GO:0045604	DNA-binding transcription factor activity, asymmetric cell division, regulation of epidermal cell differentiation
OG0000742	Wa8730a001g006920	AT3G51990.1,AT3G55950.1	Ms09t244070.1,Ms06t175110.1,Ms11t319980.1,Ms07t192350.1,Ms10t290120.1,Ms05t122920.1,Ms10t274360.1,Ms06t157690.1,Ms08t221420.1,Ms09t263310.1,Ms04t113180.1,Ms11t305940.1,Ms02t033800.1,Ms11t309350.1	CKAN_01006100,CKAN_00548200,CKAN_01048300,CKAN_01338400,CKAN_00382200,CKAN_02502600,CKAN_00910000,CKAN_01968000,CKAN_00194300,CKAN_00622000,CKAN_01661500,CKAN_00014600,CKAN_00660400	COCNU_HT001RO01_16T006680,COCNU_HT001RO01_04T014090,COCNU_HT001RO01_04T003510,COCNU_HT001RO01_11T009880,COCNU_HT001RO01_02T017770,COCNU_HT001RO01_06T007370	lm5633.a03.2.g06540_p1,lm5633.a03.8.g03510_p1	LOC_Os05g03620.1,LOC_Os07g47270.1,LOC_Os03g17550.1,LOC_Os05g07300.1,LOC_Os02g44920.1	Glyma.11G174800.1,Glyma.18G062500.1,Glyma.18G026700.1,Glyma.11G230600.1,Glyma.17G056900.3,Glyma.13G102200.1,Glyma.14G059100.1,Glyma.02G257300.1	Zm00001e027570_T001,Zm00001e023934_T001,Zm00001e001283_T001,Zm00001e030338_T001,Zm00001e020816_T001,Zm00001e029480_T001,Zm00001e030728_T004,Zm00001e013674_T002	Zosma01g17430,Zosma03g06800,Zosma06g27060,Zosma06g21730,Zosma02g17080,Zosma01g37070	GO:0042803, GO:0007178, GO:0004675	protein homodimerization activity, transmembrane receptor protein serine/threonine kinase signaling pathway, transmembrane receptor protein serine/threonine kinase activity
OG0000743	Wa8730a001g006930	AT1G08070.1,AT3G11460.1,AT5G40405.1,AT3G12770.1	Ms01t021390.1,Ms11t320630.1,Ms10t290530.1,Ms05t139220.1,Ms02t033690.1	CKAN_00562200,CKAN_01325200,CKAN_00380100,CKAN_02500400,CKAN_02451100,CKAN_01831000,CKAN_00628100,CKAN_01658400,CKAN_00924900	COCNU_HT001RO01_16T004850,COCNU_HT001RO01_12T007120,COCNU_HT001RO01_14T000640,COCNU_HT001RO01_06T006700	lm5633.a03.2.g05550_p1,lm5633.a03.8.g04180_p1,lm5633.a03.14.g08360_p1	LOC_Os07g47370.1,LOC_Os03g52475.1	.	.	Zosma03g13080,Zosma01g38540,Zosma03g02760,Zosma01g20950	GO:0003723, GO:0090305, GO:0004519	RNA binding, nucleic acid phosphodiester bond hydrolysis, endonuclease activity
OG0000744	Wa8730a001g006940	AT3G52260.2	Ms11t320840.1	CKAN_02492500	COCNU_HT001RO01_16T006810	lm5633.a03.2.g06910_p1	LOC_Os03g17920.2	Glyma.20G178400.1	Zm00001e001301_T002	Zosma03g13880	GO:0009982, GO:0042254, GO:0000455	pseudouridine synthase activity, ribosome biogenesis, enzyme-directed rRNA pseudouridine synthesis
OG0000745	Wa8730a001g006950	AT3G51990.1,AT5G60280.1,AT3G08870.1,AT5G03140.1,AT3G09780.1,AT5G62710.1	Ms05t146180.1,Ms09t244070.1,Ms06t175180.1,Ms11t318830.1,Ms07t192310.1,Ms08t208900.1,Ms08t221900.1,Ms10t275910.1,Ms04t112700.1	CKAN_00733000,CKAN_00547300,CKAN_01325000,CKAN_02493000,CKAN_01962600,CKAN_01662100,CKAN_00657600	COCNU_HT001RO01_16T006800,COCNU_HT001RO01_04T014310,COCNU_HT001RO01_02T017770	lm5633.a03.2.g06900_p1,lm5633.a03.8.g03890_p1,lm5633.a03.12.g07870_p1	LOC_Os05g03450.1,LOC_Os06g08690.1,LOC_Os01g06280.1,LOC_Os02g26160.2	Glyma.11G178300.1,Glyma.18G064100.1,Glyma.03G138400.1	Zm00001e027579_T001,Zm00001e011046_T001,Zm00001e014111_T001,Zm00001e029487_T001,Zm00001e010585_T001	Zosma01g18520,Zosma03g06600,Zosma06g26520,Zosma01g38570,Zosma03g29380	GO:0007178, GO:0002229, GO:0004675	transmembrane receptor protein serine/threonine kinase signaling pathway, defense response to oomycetes, transmembrane receptor protein serine/threonine kinase activity
OG0000746	Wa8730a001g006960	AT1G08070.1,AT4G30700.1,AT3G11460.1,AT5G40410.1,AT2G01510.1,AT3G08820.1,AT3G02010.1,AT5G16860.1,AT4G13650.1,AT3G12770.1,AT2G41080.1,AT3G57430.1	Ms05t146050.1,Ms09t243460.1,Ms03t050970.1,Ms06t173250.1,Ms11t320100.1,Ms08t227060.1,Ms07t193630.1,Ms10t290530.1,Ms05t122080.1,Ms08t208970.1,Ms05t139070.1,Ms04t090860.1,Ms08t231190.1,Ms03t075760.1,Ms08t221330.1,Ms09t263160.1,Ms04t112650.1,Ms04t084140.1,Ms11t305230.1,Ms02t033650.1,Ms11t309290.1,Ms07t199140.1	CKAN_00562200,CKAN_01141200,CKAN_02041100,CKAN_01048100,CKAN_01338100,CKAN_00380100,CKAN_00914500,CKAN_01963700,CKAN_02439600,CKAN_00087900,CKAN_00493600,CKAN_00199000,CKAN_01831000,CKAN_00889400,CKAN_00628100,CKAN_01658400,CKAN_00025000,CKAN_00924900,CKAN_00244700,CKAN_01229300,CKAN_01873600	COCNU_HT001RO01_12T007120,COCNU_HT001RO01_04T002890,COCNU_HT001RO01_11T013080,COCNU_HT001RO01_14T001690,COCNU_HT001RO01_01T003060,COCNU_HT001RO01_06T007500	lm5633.a03.2.g05550_p1,lm5633.a03.8.g04180_p1	LOC_Os07g47370.1,LOC_Os03g60200.1,LOC_Os02g44970.1	Glyma.13G232000.1,Glyma.17G220100.1	Zm00001e035817_T001,Zm00001e036301_T001,Zm00001e039180_T001,Zm00001e013713_T001	Zosma01g17450,Zosma03g13470,Zosma01g40400,Zosma06g23950,Zosma03g02760,Zosma03g19510,Zosma06g17110	GO:0080156, GO:0090305, GO:0004519	mitochondrial mRNA modification, nucleic acid phosphodiester bond hydrolysis, endonuclease activity
OG0000747	Wa8730a001g006970	AT5G03070.1	Ms10t281840.1	CKAN_02494000,CKAN_00491400	COCNU_HT001RO01_04T014270	lm5633.a03.2.g06850_p1	LOC_Os01g06470.1	Glyma.10G050200.1,Glyma.13G137700.1	Zm00001e025824_T001	Zosma01g18560,Zosma03g13890	GO:0048471, GO:0008139, GO:0005635	perinuclear region of cytoplasm, nuclear localization sequence binding, nuclear envelope
OG0000748	Wa8730a001g006980	AT5G03080.1	Ms07t193430.1,Ms10t291040.1	CKAN_01046300	COCNU_HT001RO01_16T006770,COCNU_HT001RO01_04T014280	lm5633.a03.2.g06860_p1	LOC_Os03g17940.1	Glyma.10G050300.2,Glyma.13G137800.1	Zm00001e001302_T001	Zosma01g18550	GO:0030176, GO:0042175, GO:0006651	integral component of endoplasmic reticulum membrane, nuclear outer membrane-endoplasmic reticulum membrane network, diacylglycerol biosynthetic process
OG0000749	Wa8730a001g006990	.	Ms03t064780.1	.	COCNU_HT001RO01_16T006780,COCNU_HT001RO01_04T014290,COCNU_HT001RO01_12T006750	lm5633.a03.2.g06880_p1	LOC_Os03g17930.3	Glyma.20G178100.1	Zm00001e038425_T001	Zosma01g18540	-	0
OG0000751	Wa8730a001g007000	AT3G51850.1,AT5G40540.1,AT2G41860.1,AT3G57530.1	Ms05t145920.1,Ms05t122530.1,Ms10t274520.1,Ms06t158360.1,Ms08t209090.1,Ms04t090790.1,Ms03t075410.1,Ms08t221530.1,Ms04t112380.1,Ms04t084370.1,Ms11t309480.1,Ms02t040720.1	CKAN_01155700,CKAN_01042800,CKAN_00363500,CKAN_02497000,CKAN_01963500,CKAN_00091100,CKAN_00198800,CKAN_00625400,CKAN_00015300,CKAN_01537200,CKAN_01863100	COCNU_HT001RO01_12T006860,COCNU_HT001RO01_04T003230,COCNU_HT001RO01_14T001940	lm5633.a03.2.g06660_p1,lm5633.a03.8.g03750_p1	LOC_Os01g61590.1,LOC_Os05g39090.1,LOC_Os03g59390.1	Glyma.18G202100.1,Glyma.07G151000.1,Glyma.06G189600.1,Glyma.03G138000.1,Glyma.04G175300.1,Glyma.17G096000.1	Zm00001e031865_T001,Zm00001e027273_T001,Zm00001e006100_T001,Zm00001e028808_T001,Zm00001e010580_T001	Zosma01g17590,Zosma06g30440,Zosma06g21820	GO:0007154, GO:0071944, GO:0046777	cell communication, cell periphery, protein autophosphorylation
OG0000752	Wa8730a001g007010	.	Ms03t050900.1,Ms07t193910.1,Ms03t058970.1,Ms05t124360.1,Ms01t017770.1,Ms10t274350.1,Ms04t090840.1,Ms04t083600.1	CKAN_01156400,CKAN_02059100,CKAN_00366200,CKAN_00495600,CKAN_02577400,CKAN_01655500	COCNU_HT001RO01_04T014190,COCNU_HT001RO01_01T008390,COCNU_HT001RO01_04T003020,COCNU_HT001RO01_11T009580,COCNU_HT001RO01_06T006370	lm5633.a03.2.g06690_p1	LOC_Os05g07070.2	Glyma.10G051200.4,Glyma.04G075400.2,Glyma.06G076600.1,Glyma.04G153500.1,Glyma.06G229700.1	Zm00001e013125_T002,Zm00001e013672_T001,Zm00001e031106_T001	Zosma06g27260,Zosma03g00490	GO:1900057, GO:0046621, GO:1905623	positive regulation of leaf senescence, negative regulation of organ growth, positive regulation of leaf development
OG0000753	Wa8730a001g007020	AT5G40260.1,AT5G62850.1	Ms07t192640.1,Ms10t288550.1,Ms08t230990.1	CKAN_01864100	COCNU_HT001RO01_06T007360	.	.	Glyma.08G025100.1,Glyma.17G090800.1	Zm00001e014126_T004	Zosma06g25200	GO:0034219, GO:0051119, GO:0051260	carbohydrate transmembrane transport, sugar transmembrane transporter activity, protein homooligomerization
OG0000754	Wa8730a001g007030	.	.	.	.	.	.	.	.	.
OG0000755	Wa8730a001g007040	.	.	.	.	lm5633.a03.2.g06730_p1,lm5633.a03.11.g01890_p1	.	.	.	.
OG0000756	Wa8730a001g007050	AT3G52250.1	Ms06t175150.1	CKAN_00541500	COCNU_HT001RO01_16T006730,COCNU_HT001RO01_04T014210	lm5633.a03.2.g06750_p1	LOC_Os05g03550.1	Glyma.10G212600.1	Zm00001e027573_T001,Zm00001e029482_T003	Zosma03g13910	GO:0006366, GO:0000122, GO:0044454	transcription by RNA polymerase II, negative regulation of transcription by RNA polymerase II, obsolete nuclear chromosome part
OG0000757	Wa8730a001g007060	.	Ms08t227390.1	.	COCNU_HT001RO01_04T014220	lm5633.a03.2.g06760_p1	LOC_Os05g03540.1	.	Zm00001e040066_T001,Zm00001e029483_T001	Zosma02g17040	-	0
OG0000758	Wa8730a001g007070	AT4G30610.1,AT2G24000.1,AT3G52020.1,AT3G07990.1,AT3G02110.1	Ms11t318870.1,Ms08t227380.1,Ms05t123970.1,Ms07t201970.1,Ms10t271770.1,Ms04t112770.1,Ms07t199040.1	CKAN_00541600,CKAN_02037500,CKAN_01327800,CKAN_00379500,CKAN_01951400	COCNU_HT001RO01_16T006750,COCNU_HT001RO01_04T014240,COCNU_HT001RO01_12T006770,COCNU_HT001RO01_02T017580	lm5633.a03.2.g06790_p1,lm5633.a03.12.g08100_p1	LOC_Os01g61690.1,LOC_Os06g08720.2,LOC_Os01g06490.1,LOC_Os02g55130.1	Glyma.17G073200.1,Glyma.02G204700.1,Glyma.18G266700.1,Glyma.04G155900.1,Glyma.20G178600.1,Glyma.10G212500.1	Zm00001e019384_T002,Zm00001e035744_T002,Zm00001e010893_T002,Zm00001e036298_T003,Zm00001e040001_T001,Zm00001e025826_T002,Zm00001e014101_T001,Zm00001e016112_T002,Zm00001e016843_T001	Zosma03g13900,Zosma01g36780,Zosma05g17740	GO:0009742, GO:0044257, GO:0005615	brassinosteroid mediated signaling pathway, cellular protein catabolic process, extracellular space
OG0000760	Wa8730a001g007080	AT5G58660.1,AT5G05600.1,AT2G38240.1,AT3G11180.1,AT3G55970.1,AT3G12900.1	Ms05t145910.1,Ms09t243660.1,Ms06t175100.1,Ms11t320060.1,Ms07t193450.1,Ms10t292840.1,Ms05t124380.1,Ms06t158020.1,Ms09t262960.1,Ms04t113020.1,Ms02t034000.1	CKAN_02496600,CKAN_00499400,CKAN_01542600	COCNU_HT001RO01_16T006640,COCNU_HT001RO01_04T013990,COCNU_HT001RO01_12T006850,COCNU_HT001RO01_04T003220	.	LOC_Os05g03640.1,LOC_Os01g61610.1,LOC_Os03g18030.1	Glyma.18G201900.2,Glyma.07G150900.1,Glyma.18G026500.1,Glyma.11G230800.1,Glyma.03G057100.4,Glyma.01G121209.1,Glyma.14G058700.1,Glyma.02G257700.1	Zm00001e038422_T001,Zm00001e019390_T001,Zm00001e001310_T002,Zm00001e036356_T001,Zm00001e029477_T001,Zm00001e028806_T003	Zosma02g21610,Zosma06g21460	GO:0120091, GO:2000022, GO:0080167	jasmonic acid hydrolase, regulation of jasmonic acid mediated signaling pathway, response to karrikin
OG0000761	Wa8730a001g007090	AT5G05340.1,AT2G41480.1	Ms05t146110.1,Ms10t274320.1,Ms04t079820.1,Ms09t263180.1	CKAN_00579200,CKAN_01168700,CKAN_02012100,CKAN_00377400,CKAN_00029300	COCNU_HT001RO01_04T014250,COCNU_HT001RO01_12T006420,COCNU_HT001RO01_11T008680,COCNU_HT001RO01_06T006430	lm5633.a03.2.g06810_p1,lm5633.a03.12.g08510_p1	LOC_Os07g49360.1	Glyma.10G050800.1,Glyma.13G138300.1,Glyma.02G259300.1,Glyma.17G221400.1,Glyma.20G191800.1	Zm00001e013123_T001,Zm00001e030724_T001	Zosma02g21500,Zosma03g14150,Zosma01g38500,Zosma03g19370	GO:0097237, GO:0009505, GO:0004601	cellular response to toxic substance, plant-type cell wall, peroxidase activity
OG0000762	Wa8730a001g007100	AT5G57130.1,AT1G07200.2,AT4G30350.1,AT3G52490.1,AT2G40130.1,AT2G29970.1	Ms05t120990.1,Ms03t050700.1,Ms09t252480.1,Ms07t193790.1,Ms03t058870.1,Ms01t017890.1,Ms07t201740.1,Ms07t183960.1,Ms10t276010.1	CKAN_02050400,CKAN_02496700	COCNU_HT001RO01_01T008840,COCNU_HT001RO01_12T006820,COCNU_HT001RO01_04T003090,COCNU_HT001RO01_11T009200	lm5633.a03.2.g06640_p1,lm5633.a03.12.g09890_p1	LOC_Os11g01330.1,LOC_Os12g01360.1,LOC_Os08g15230.1	Glyma.11G174500.4,Glyma.02G226900.6,Glyma.18G062300.1,Glyma.18G026600.3,Glyma.11G230700.1,Glyma.14G193900.1,Glyma.17G058400.1,Glyma.13G101300.1,Glyma.09G060500.1	Zm00001e030230_T001,Zm00001e039159_T002	Zosma01g40220,Zosma05g26990,Zosma01g36820,Zosma06g15850	GO:0033500, GO:0010233, GO:1902347	carbohydrate homeostasis, phloem transport, response to strigolactone
OG0000763	Wa8730a001g007110	AT5G58690.1,AT2G40116.1,AT3G08510.1,AT3G55940.1	.	CKAN_00541300,CKAN_02494300	COCNU_HT001RO01_16T006710,COCNU_HT001RO01_04T014130,COCNU_HT001RO01_04T003120	lm5633.a03.2.g06610_p1	LOC_Os05g03610.1,LOC_Os07g49330.1,LOC_Os03g18010.1	Glyma.18G027200.1,Glyma.11G230100.1,Glyma.14G193800.1,Glyma.14G059200.1,Glyma.02G257200.1	Zm00001e011023_T003,Zm00001e001312_T002,Zm00001e038167_T001	Zosma02g21570,Zosma01g17340,Zosma06g21480	GO:0009556, GO:0010601, GO:0019953	microsporogenesis, positive regulation of auxin biosynthetic process, sexual reproduction
OG0000764	Wa8730a001g007120	AT5G58770.1,AT2G23410.1,AT5G60510.1	Ms05t122300.1,Ms04t113140.1,Ms02t033890.1	.	COCNU_HT001RO01_01T003370	lm5633.a03.2.g07040_p1	.	Glyma.02G226200.1,Glyma.14G193000.1	Zm00001e036373_T001,Zm00001e034861_T001	Zosma06g30470	GO:0009668, GO:0016094, GO:0050267	plastid membrane organization, polyprenol biosynthetic process, rubber cis-polyprenylcistransferase activity
OG0000765	Wa8730a001g007130	AT5G60370.1	Ms06t175230.1	CKAN_02494800	COCNU_HT001RO01_16T006900	.	LOC_Os05g03200.1	Glyma.11G153378.1	Zm00001e029505_T004	Zosma04g25710	-	0
OG0000766	Wa8730a001g007140	.	Ms05t144980.1,Ms09t243570.1,Ms11t320820.1,Ms08t227360.1,Ms08t208380.1,Ms04t104350.1,Ms01t008930.1	CKAN_02495200	COCNU_HT001RO01_16T006920,COCNU_HT001RO01_04T014420	lm5633.a03.2.g07030_p1	LOC_Os05g03174.1,LOC_Os07g49370.1,LOC_Os03g17850.1	Glyma.10G050100.1,Glyma.13G137600.1	.	Zosma01g18590	GO:0010417, GO:0005794, GO:0009834	glucuronoxylan biosynthetic process, Golgi apparatus, plant-type secondary cell wall biogenesis
OG0000767	Wa8730a001g007150	AT5G02970.1,AT3G09690.1	Ms09t243580.1,Ms06t175220.1	CKAN_02491600	COCNU_HT001RO01_16T006860,COCNU_HT001RO01_04T014370	lm5633.a03.2.g07010_p1	LOC_Os03g17900.1	Glyma.10G049800.2,Glyma.13G137300.1,Glyma.12G071800.3,Glyma.11G152751.1	Zm00001e038427_T001,Zm00001e001300_T001	Zosma01g18480	-	0
OG0000768	Wa8730a001g007160	AT2G41490.1,AT3G57220.1	Ms11t318610.1	.	.	lm5633.a03.2.g07000_p1	.	.	Zm00001e035772_T001,Zm00001e010915_T001	Zosma01g38620	GO:0003975, GO:0006487, GO:0009101	UDP-N-acetylglucosamine-dolichyl-phosphate N-acetylglucosaminephosphotransferase activity, protein N-linked glycosylation, glycoprotein biosynthetic process
OG0000769	Wa8730a001g007170	AT5G60410.1	Ms09t243610.1,Ms06t175210.1,Ms06t157960.1,Ms10t281880.1	CKAN_02494200	COCNU_HT001RO01_16T006840,COCNU_HT001RO01_04T014350,COCNU_HT001RO01_04T002970	lm5633.a03.2.g06950_p1	LOC_Os05g03430.2,LOC_Os03g50980.1	Glyma.12G071300.1,Glyma.11G154005.2,Glyma.13G328100.10	Zm00001e027582_T001,Zm00001e020810_T002,Zm00001e029498_T004	Zosma02g21490	GO:0009787, GO:0010247, GO:0016036	regulation of abscisic acid-activated signaling pathway, detection of phosphate ion, cellular response to phosphate starvation
OG0000770	Wa8730a001g007180	AT5G60210.1	Ms06t175250.1,Ms10t274290.1,Ms08t221490.1	CKAN_02490400	COCNU_HT001RO01_16T006960,COCNU_HT001RO01_04T014460,COCNU_HT001RO01_12T006940,COCNU_HT001RO01_04T002930	lm5633.a03.2.g07070_p1	LOC_Os05g03120.1,LOC_Os01g61760.4	Glyma.10G049600.1,Glyma.13G137200.2,Glyma.12G072200.3,Glyma.11G151915.1,Glyma.13G328900.1	.	Zosma01g18620	GO:0015630, GO:0009664, GO:0005874	microtubule cytoskeleton, plant-type cell wall organization, microtubule
OG0000771	Wa8730a001g007190	.	.	.	.	.	.	.	.	.
OG0000772	Wa8730a001g007200	AT5G60150.2	Ms05t129520.1,Ms10t290990.1	CKAN_02489500	COCNU_HT001RO01_16T007000,COCNU_HT001RO01_04T002910	.	LOC_Os11g01220.1,LOC_Os05g03060.1,LOC_Os12g01220.1	Glyma.12G072900.5,Glyma.11G150661.1	Zm00001e015070_T002	Zosma01g17510,Zosma06g27340	-	0
OG0000773	Wa8730a001g007210	AT2G18940.1,AT5G39710.1,AT3G09650.1	Ms09t243460.1,Ms06t172870.1,Ms11t319960.1,Ms07t193170.1,Ms01t001300.1,Ms03t075270.1,Ms09t263160.1,Ms10t276000.1,Ms04t112650.1,Ms11t309250.1	CKAN_02019200,CKAN_01048100,CKAN_01320500,CKAN_01953900,CKAN_00417900,CKAN_00627500	COCNU_HT001RO01_12T006580,COCNU_HT001RO01_04T002890,COCNU_HT001RO01_01T002300	lm5633.a03.2.g07140_p1,lm5633.a03.12.g09440_p1,lm5633.a03.14.g07980_p1	LOC_Os11g01210.1,LOC_Os12g01210.1,LOC_Os08g15090.1,LOC_Os06g08650.1,LOC_Os03g52620.1	Glyma.10G049200.1,Glyma.02G216900.7,Glyma.14G184200.2	Zm00001e019387_T001,Zm00001e027557_T002,Zm00001e030419_T001,Zm00001e016871_T001	Zosma02g21110,Zosma01g18650,Zosma03g12270,Zosma03g06270,Zosma01g39850,Zosma06g21500,Zosma02g17100,Zosma03g19510,Zosma01g37080	GO:0003729, GO:0090305, GO:0004519	mRNA binding, nucleic acid phosphodiester bond hydrolysis, endonuclease activity
OG0000774	Wa8730a001g007220	AT3G13050.1	Ms01t001230.1	CKAN_02014800	COCNU_HT001RO01_11T009960	lm5633.a03.2.g07180_p1	LOC_Os04g51970.1,LOC_Os09g38690.1	Glyma.08G226400.1,Glyma.07G000800.5	Zm00001e010591_T001	Zosma03g06770	GO:0035461, GO:2001143, GO:0090417	vitamin transmembrane transport, N-methylnicotinate transport, N-methylnicotinate transmembrane transporter activity
OG0000775	Wa8730a001g007230	AT4G31130.1	Ms09t243430.1,Ms06t175320.1,Ms10t274210.1,Ms06t157890.1,Ms08t208430.1	CKAN_00410200,CKAN_00017500	COCNU_HT001RO01_04T014720,COCNU_HT001RO01_04T002750	lm5633.a03.2.g07190_p1	LOC_Os05g02990.2,LOC_Os05g38960.1	Glyma.14G131700.1,Glyma.04G074100.1,Glyma.06G075200.1	Zm00001e029531_T001	.	-	0
OG0000776	Wa8730a001g007240	AT3G10320.1,AT2G41640.1,AT3G57380.1	Ms10t292970.1,Ms08t221590.1	.	COCNU_HT001RO01_02T017800	.	.	Glyma.03G134800.1	Zm00001e035748_T001,Zm00001e010897_T001,Zm00001e030705_T001,Zm00001e027195_T001	Zosma03g19670	-	0
OG0000777	Wa8730a001g007250	AT2G07170.1,AT4G27060.1	Ms04t089490.1,Ms09t262490.1	CKAN_02071800,CKAN_00411800	COCNU_HT001RO01_01T007710,COCNU_HT001RO01_11T009860	lm5633.a03.2.g07240_p1	LOC_Os09g38710.1	Glyma.01G001200.1	Zm00001e034876_T001	Zosma06g28300	GO:0044430, GO:0008017, GO:0015630	obsolete cytoskeletal part, microtubule binding, microtubule cytoskeleton
OG0000778	Wa8730a001g007260	AT2G07050.1	Ms07t193690.1	CKAN_01140900	COCNU_HT001RO01_02T019840	lm5633.a03.2.g07260_p1	LOC_Os02g04710.1	Glyma.08G225800.1,Glyma.07G001300.2,Glyma.20G192700.2,Glyma.01G001300.1,Glyma.08G027000.1	Zm00001e013194_T001,Zm00001e040045_T001,Zm00001e013633_T003	Zosma01g40370	GO:0010686, GO:0019745, GO:0016871	tetracyclic triterpenoid biosynthetic process, pentacyclic triterpenoid biosynthetic process, cycloartenol synthase activity
OG0000779	Wa8730a001g007270	.	Ms03t073500.1	CKAN_00357900	.	lm5633.a03.2.g07260_p1	LOC_Os06g43690.1	Glyma.01G001600.1	Zm00001e037473_T002,Zm00001e030429_T001	Zosma05g18040	GO:0017070, GO:0030621, GO:0009560	U6 snRNA binding, U4 snRNA binding, embryo sac egg cell differentiation
OG0000780	Wa8730a001g007280	.	Ms09t259230.1	CKAN_02058700	COCNU_HT001RO01_11T009550,COCNU_HT001RO01_01T003350	.	LOC_Os04g51380.1	.	.	Zosma06g28060	GO:0009788, GO:0004671, GO:0006481	negative regulation of abscisic acid-activated signaling pathway, protein C-terminal S-isoprenylcysteine carboxyl O-methyltransferase activity, C-terminal protein methylation
OG0000781	Wa8730a001g007290	AT5G39710.1,AT5G02860.1,AT4G14190.1	Ms11t319960.1,Ms01t018040.1,Ms02t029160.1,Ms10t269710.1,Ms03t074950.1,Ms11t308760.1	CKAN_02058500,CKAN_02435800,CKAN_00499800,CKAN_01516000,CKAN_00627500,CKAN_01659700,CKAN_00017800	COCNU_HT001RO01_01T008460,COCNU_HT001RO01_04T002890	lm5633.a03.2.g07910_p1,lm5633.a03.2.g17840_p1,lm5633.a03.14.g08780_p1	LOC_Os11g01210.1,LOC_Os12g01210.1,LOC_Os06g47950.1	Glyma.15G164700.1	Zm00001e013118_T001,Zm00001e030419_T001	Zosma03g12270,Zosma03g06270,Zosma03g19270	GO:0009451, GO:0090305, GO:0004519	RNA modification, nucleic acid phosphodiester bond hydrolysis, endonuclease activity
OG0000782	Wa8730a001g007300	.	Ms03t050890.1,Ms04t080020.1,Ms10t298080.1,Ms01t001010.1,Ms08t230730.1,Ms10t276280.1	CKAN_01135500,CKAN_02059000,CKAN_00366300	COCNU_HT001RO01_11T012900,COCNU_HT001RO01_02T018710	.	LOC_Os04g56300.1	.	Zm00001e025049_T001,Zm00001e006681_T001,Zm00001e022556_T001	Zosma03g00500	-	0
OG0000783	Wa8730a001g007310	.	Ms09t259220.1,Ms03t058980.1,Ms01t017760.1,Ms01t001020.1,Ms03t046630.1,Ms09t262290.1	CKAN_02059200,CKAN_00366100	COCNU_HT001RO01_01T008380,COCNU_HT001RO01_11T009590	.	LOC_Os04g51410.1,LOC_Os08g14310.1,LOC_Os06g44870.1,LOC_Os04g56309.1	Glyma.15G001900.1,Glyma.17G055600.1,Glyma.13G371800.1,Glyma.15G185200.2	Zm00001e013789_T001,Zm00001e030413_T001,Zm00001e040091_T001	Zosma05g26820,Zosma03g19500	-	0
OG0000784	Wa8730a001g007320	AT2G18400.1	Ms04t084770.1	.	.	lm5633.a03.2.g07650_p1	LOC_Os03g51510.1	Glyma.06G239200.1,Glyma.20G193100.3	Zm00001e038182_T001	Zosma03g29280	GO:0005737, GO:0005739, GO:0044444	cytoplasm, mitochondrion, obsolete cytoplasmic part
OG0000785	Wa8730a001g007330	.	Ms06t173170.1,Ms10t291420.1,Ms05t138900.1	CKAN_02059900	COCNU_HT001RO01_11T012970,COCNU_HT001RO01_02T018780	lm5633.a03.2.g07640_p1	LOC_Os04g56350.1	Glyma.17G055832.1,Glyma.13G103200.1	Zm00001e006677_T001	Zosma01g40210	GO:0050434, GO:0043902, GO:0006364	positive regulation of viral transcription, positive regulation of multi-organism process, rRNA processing
OG0000786	Wa8730a001g007340	AT5G57550.1,AT2G18800.1,AT4G30270.1,AT2G06850.1,AT4G14130.1,AT4G25810.1	Ms03t050930.1,Ms09t252450.1,Ms06t173160.1,Ms08t226790.1,Ms07t193930.1,Ms10t291410.1,Ms04t080040.1,Ms10t298100.1,Ms05t138890.1,Ms01t001030.1	CKAN_01164100,CKAN_02060000,CKAN_01313300,CKAN_00364900,CKAN_01953600	COCNU_HT001RO01_01T008330,COCNU_HT001RO01_11T013020,COCNU_HT001RO01_02T018860	lm5633.a03.2.g07630_p1,lm5633.a03.12.g09070_p1,lm5633.a03.14.g08290_p1	LOC_Os04g51460.1,LOC_Os08g14210.1,LOC_Os06g48180.1	Glyma.17G065000.1,Glyma.13G095200.1,Glyma.09G062600.1,Glyma.15G169100.1,Glyma.08G035900.1	Zm00001e013135_T002,Zm00001e007028_T002,Zm00001e022301_T001,Zm00001e040078_T001,Zm00001e014177_T001,Zm00001e041589_T001	Zosma03g15300,Zosma03g00340,Zosma03g18920	GO:0009741, GO:0016762, GO:0009612	response to brassinosteroid, xyloglucan:xyloglucosyl transferase activity, response to mechanical stimulus
OG0000787	Wa8730a001g007350	AT2G32980.1	Ms03t074880.1	.	.	lm5633.a03.2.g07620_p1	.	.	Zm00001e040004_T001	Zosma01g21190	GO:0000911, GO:0046785, GO:0007020	cytokinesis by cell plate formation, microtubule polymerization, microtubule nucleation
OG0000788	Wa8730a001g007360	AT2G19350.1,AT4G29850.1	Ms10t291380.1,Ms03t058990.1,Ms01t017720.1,Ms07t183840.1,Ms10t275750.1	CKAN_00363900	COCNU_HT001RO01_01T008270,COCNU_HT001RO01_11T013100,COCNU_HT001RO01_02T018970	lm5633.a03.12.g09100_p1	LOC_Os02g07980.1	Glyma.09G062200.1,Glyma.15G168600.1	Zm00001e037683_T001,Zm00001e025114_T001	Zosma03g00400	-	0
OG0000789	Wa8730a001g007370	AT4G31550.1,AT2G24570.1	Ms05t120940.1,Ms03t050980.1,Ms07t193830.1,Ms10t291370.1,Ms01t017710.1,Ms05t138940.1,Ms03t073960.1,Ms04t104100.1,Ms03t046370.1,Ms09t262340.1,Ms06t151180.1	CKAN_01169700,CKAN_02062800,CKAN_00363600,CKAN_00914600	COCNU_HT001RO01_01T008250,COCNU_HT001RO01_11T013110,COCNU_HT001RO01_02T019020	lm5633.a03.2.g05580_p1,lm5633.a03.12.g09120_p1,lm5633.a03.14.g08420_p1	LOC_Os04g51560.1,LOC_Os08g13840.1,LOC_Os02g08440.1,LOC_Os06g44010.1	Glyma.17G197500.2,Glyma.14G135400.1,Glyma.17G057100.1,Glyma.13G102000.1,Glyma.09G061900.1,Glyma.15G168200.1,Glyma.04G076200.1,Glyma.06G077400.1	Zm00001e007023_T001,Zm00001e022296_T001	Zosma03g06450,Zosma06g28110,Zosma06g23910,Zosma05g26860,Zosma02g17880,Zosma03g19440,Zosma05g17770	GO:1990841, GO:0010200, GO:0005516	promoter-specific chromatin binding, response to chitin, calmodulin binding
OG0000790	Wa8730a001g007380	AT1G51600.1	Ms09t259210.1,Ms09t243480.1,Ms03t051030.1,Ms09t252490.1,Ms10t274230.1,Ms02t028810.1,Ms08t208410.1,Ms08t230870.1,Ms10t276340.1	CKAN_00580900,CKAN_01137500,CKAN_02064800,CKAN_01306800,CKAN_00361600,CKAN_00244600	COCNU_HT001RO01_01T008120,COCNU_HT001RO01_11T013230,COCNU_HT001RO01_02T019220	lm5633.a03.2.g07580_p1	LOC_Os11g01074.4,LOC_Os12g01080.1,LOC_Os07g49460.1,LOC_Os06g48534.1,LOC_Os02g05510.1	Glyma.08G221800.2,Glyma.02G215600.1,Glyma.14G182800.1	Zm00001e013157_T002,Zm00001e030243_T002	Zosma06g28240,Zosma01g40450,Zosma03g02170,Zosma02g16910	GO:0005634, GO:0003682, GO:0045944	nucleus, chromatin binding, positive regulation of transcription by RNA polymerase II
OG0000791	Wa8730a001g007390	AT1G51580.1,AT5G64390.1	Ms10t298130.1,Ms06t151050.1	CKAN_00361100,CKAN_01540800,CKAN_00244500,CKAN_01864200	COCNU_HT001RO01_02T019230	.	LOC_Os09g32300.1	Glyma.08G221700.1,Glyma.07G020300.1	Zm00001e010096_T001,Zm00001e030716_T002	Zosma03g15100,Zosma03g02220	GO:0031053, GO:0070878, GO:0010445	primary miRNA processing, primary miRNA binding, nuclear dicing body
OG0000792	Wa8730a001g007400	AT5G57170.1,AT5G01650.1	Ms05t123450.1,Ms07t201630.1,Ms06t151150.1,Ms02t041860.1	CKAN_00749500,CKAN_00360400	COCNU_HT001RO01_16T006100,COCNU_HT001RO01_04T013250,COCNU_HT001RO01_11T013300	.	LOC_Os11g01600.2,LOC_Os12g01680.1,LOC_Os06g48600.1	Glyma.18G207300.2,Glyma.07G156500.2,Glyma.17G058800.1,Glyma.01G126000.1,Glyma.13G100900.1	Zm00001e013161_T001,Zm00001e023950_T001	Zosma03g13540,Zosma03g19570	GO:0043030, -, GO:0033033	regulation of macrophage activation, 0, negative regulation of myeloid cell apoptotic process
OG0000793	Wa8730a001g007410	AT1G16860.1	Ms05t121020.1,Ms09t252510.1,Ms03t059050.1,Ms01t017680.1,Ms07t183810.1,Ms01t001110.1,Ms03t073930.1,Ms04t103690.1,Ms09t262390.1	CKAN_01137900,CKAN_02065400,CKAN_01305900	COCNU_HT001RO01_01T008000,COCNU_HT001RO01_11T009780	lm5633.a03.2.g07560_p1,lm5633.a03.14.g08500_p1	LOC_Os04g51710.1,LOC_Os08g13350.1	Glyma.08G224000.1,Glyma.07G002600.1,Glyma.15G001200.1,Glyma.13G372500.2,Glyma.07G020800.1	Zm00001e007013_T003,Zm00001e022289_T002,Zm00001e040067_T002,Zm00001e041596_T001	Zosma03g02140	GO:0005623, GO:0005886, GO:0071944	obsolete cell, plasma membrane, cell periphery
OG0000794	Wa8730a001g007420	.	.	.	.	.	.	.	.	.
OG0000795	Wa8730a001g007430	AT5G57240.1,AT4G25850.2	Ms05t121030.1,Ms09t243180.1,Ms09t252530.1	CKAN_02066800,CKAN_02438200	COCNU_HT001RO01_12T007900,COCNU_HT001RO01_02T019440	lm5633.a03.12.g09990_p1	.	Glyma.17G060100.3,Glyma.13G100000.1,Glyma.09G058900.1,Glyma.15G165000.2	.	Zosma03g07060	GO:0009567, -, GO:0032934	double fertilization forming a zygote and endosperm, 0, sterol binding
OG0000796	Wa8730a001g007440	AT2G19170.1,AT4G30020.1	Ms09t252520.1,Ms05t123800.1,Ms10t298280.1,Ms10t269790.1,Ms06t151020.1,Ms10t282060.1,Ms01t008740.1,Ms07t199340.1	CKAN_02066600,CKAN_00359900,CKAN_01665100,CKAN_01541900,CKAN_00651000	COCNU_HT001RO01_01T008630,COCNU_HT001RO01_11T010200,COCNU_HT001RO01_02T019420,COCNU_HT001RO01_08T004570	lm5633.a03.2.g07490_p1	LOC_Os09g26920.1,LOC_Os06g48650.1	Glyma.13G100100.7,Glyma.09G059000.2,Glyma.15G165100.1	Zm00001e013165_T002,Zm00001e030237_T001	Zosma03g13240,Zosma03g07050,Zosma03g19180	GO:0009505, GO:0006508, GO:0004252	plant-type cell wall, proteolysis, serine-type endopeptidase activity
OG0000797	Wa8730a001g007450	.	Ms05t121230.1	.	.	.	LOC_Os09g26730.1	.	Zm00001e036248_T001	.	GO:1901033, GO:1904833, GO:1901671	positive regulation of response to reactive oxygen species, positive regulation of removal of superoxide radicals, positive regulation of superoxide dismutase activity
OG0000798	Wa8730a001g007460	.	Ms07t199230.1	CKAN_01138700	COCNU_HT001RO01_02T019410	lm5633.a03.2.g07510_p1	LOC_Os02g05440.1	.	Zm00001e013652_T003	.	GO:0008544, GO:0009913, GO:0030307	epidermis development, epidermal cell differentiation, positive regulation of cell growth
OG0000799	Wa8730a001g007470	AT5G56940.1	Ms10t269780.1	CKAN_01138600,CKAN_00360100	.	lm5633.a03.2.g07520_p1	LOC_Os09g32274.1	Glyma.09G064500.1,Glyma.15G170800.1	.	Zosma03g01450	GO:0140053, GO:0032543, GO:0005743	mitochondrial gene expression, mitochondrial translation, mitochondrial inner membrane
OG0000800	Wa8730a001g007480	.	Ms04t083290.1	CKAN_00284500	COCNU_HT001RO01_11T009800,COCNU_HT001RO01_02T019710	lm5633.a03.2.g07550_p1	.	Glyma.13G372700.1	Zm00001e034880_T002	Zosma03g19600	GO:0050832, GO:0016592, GO:0009909	defense response to fungus, mediator complex, regulation of flower development
OG0000801	Wa8730a001g007490	AT4G31390.1,AT5G24810.1	Ms06t151130.1	CKAN_01303400	COCNU_HT001RO01_01T008280,COCNU_HT001RO01_02T019490	lm5633.a03.2.g07450_p1	LOC_Os06g48770.1,LOC_Os04g56510.1	Glyma.17G188300.2,Glyma.14G139800.1	Zm00001e030228_T001	Zosma03g19080	GO:1904143, -, GO:1902171	positive regulation of carotenoid biosynthetic process, 0, regulation of tocopherol cyclase activity
OG0000802	Wa8730a001g007500	.	Ms03t051120.1,Ms09t252610.1,Ms06t173340.1,Ms04t089500.1,Ms05t139110.1,Ms10t269810.1,Ms04t083260.1,Ms07t199260.1	CKAN_02069500,CKAN_01303000,CKAN_00358400,CKAN_01517100,CKAN_01538000	COCNU_HT001RO01_01T007770,COCNU_HT001RO01_11T013540,COCNU_HT001RO01_02T019600	lm5633.a03.2.g07450_p1,lm5633.a03.8.g04610_p1	LOC_Os09g26610.1,LOC_Os04g51890.1,LOC_Os06g48850.1,LOC_Os02g05060.1	Glyma.04G078000.1,Glyma.06G079200.1,Glyma.08G028500.1	Zm00001e006995_T001,Zm00001e030223_T001,Zm00001e036256_T001,Zm00001e010130_T001,Zm00001e041602_T001	Zosma01g00550,Zosma03g06950,Zosma06g28270,Zosma01g38590,Zosma02g08110	GO:2000012, -, GO:0046621	regulation of auxin polar transport, 0, negative regulation of organ growth
OG0000803	Wa8730a001g007510	AT1G51650.1	Ms09t259300.1,Ms02t029260.1,Ms01t008900.1	CKAN_02050500	COCNU_HT001RO01_11T009230	lm5633.a03.2.g08150_p1	LOC_Os08g15170.1	Glyma.08G222900.3,Glyma.07G003700.1	.	.	GO:0005753, GO:0005740, GO:0005743	mitochondrial proton-transporting ATP synthase complex, mitochondrial envelope, mitochondrial inner membrane
OG0000804	Wa8730a001g007520	AT4G30360.1,AT2G24610.1	Ms05t120830.1,Ms03t050690.1,Ms07t194390.1,Ms10t291660.1,Ms04t111720.1,Ms11t308630.1	CKAN_01020600,CKAN_00554900,CKAN_01132800,CKAN_02049800,CKAN_00889800	COCNU_HT001RO01_01T008860,COCNU_HT001RO01_11T012580,COCNU_HT001RO01_01T004490	lm5633.a03.2.g08140_p1,lm5633.a03.14.g07740_p1	LOC_Os06g08850.1,LOC_Os02g54760.1,LOC_Os09g38580.1	Glyma.12G076800.2,Glyma.04G076432.1,Glyma.13G324600.1,Glyma.06G077600.1,Glyma.04G157200.1,Glyma.06G223800.1,Glyma.06G184000.1,Glyma.04G181000.1	Zm00001e036286_T001,Zm00001e015160_T001,Zm00001e030701_T001,Zm00001e016088_T002,Zm00001e034885_T002	Zosma06g20580,Zosma02g17820,Zosma06g15890	GO:0022839, GO:0042391, GO:0071805	ion gated channel activity, regulation of membrane potential, potassium ion transmembrane transport
OG0000805	Wa8730a001g007530	.	Ms05t120820.1,Ms09t252200.1	.	COCNU_HT001RO01_11T009160	lm5633.a03.2.g08120_p1,lm5633.a03.14.g07750_p1	LOC_Os02g08190.1,LOC_Os02g54780.1	Glyma.02G132700.1	Zm00001e023725_T001,Zm00001e025081_T001,Zm00001e013808_T001	Zosma03g06190	-	0
OG0000806	Wa8730a001g007540	.	Ms03t050680.1	.	COCNU_HT001RO01_01T004450	.	.	Glyma.08G222700.1,Glyma.07G003900.1	.	Zosma01g04340	-	0
OG0000807	Wa8730a001g007550	.	.	.	COCNU_HT001RO01_01T008870	.	LOC_Os06g44360.1	.	.	.	-	0
OG0000808	Wa8730a001g007560	AT4G27040.1	Ms10t291690.1	CKAN_01132900	COCNU_HT001RO01_01T004380	lm5633.a03.2.g08110_p1	.	.	.	Zosma01g40060	GO:0043328, GO:0000814, GO:0043162	protein transport to vacuole involved in ubiquitin-dependent protein catabolic process via the multivesicular body sorting pathway, ESCRT II complex, ubiquitin-dependent protein catabolic process via the multivesicular body sorting pathway
OG0000809	Wa8730a001g007570	.	Ms09t259290.1,Ms02t029250.1	.	COCNU_HT001RO01_01T008800	lm5633.a03.2.g08160_p1	LOC_Os08g15080.1	Glyma.08G223200.2,Glyma.07G003500.2	.	Zosma03g06130	GO:0048661, GO:0055123, GO:0048546	positive regulation of smooth muscle cell proliferation, digestive system development, digestive tract morphogenesis
OG0000811	Wa8730a001g007580	AT5G57660.1,AT2G24790.1,AT3G02380.1,AT5G24930.1	Ms09t259270.1,Ms07t193980.1,Ms10t291630.1,Ms03t058880.1,Ms01t017840.1,Ms02t029210.1,Ms03t074170.1,Ms09t262080.1,Ms11t306260.1	CKAN_01210300,CKAN_00550800,CKAN_01132700,CKAN_02052700,CKAN_01534100	COCNU_HT001RO01_01T008760,COCNU_HT001RO01_11T009270	lm5633.a03.2.g08180_p1,lm5633.a03.12.g09270_p1	LOC_Os08g15050.1,LOC_Os02g08150.1,LOC_Os04g42020.1,LOC_Os06g44450.1,LOC_Os03g50310.1,LOC_Os02g39710.1	Glyma.08G221600.1,Glyma.17G066600.1,Glyma.13G093800.1,Glyma.04G058900.1,Glyma.06G059600.1,Glyma.07G020400.1	Zm00001e037706_T002,Zm00001e025117_T001,Zm00001e013804_T001,Zm00001e007691_T003	Zosma03g06090,Zosma01g40450,Zosma05g26960,Zosma02g16910,Zosma04g25910	GO:0010099, GO:0009909, GO:0010161	regulation of photomorphogenesis, regulation of flower development, red light signaling pathway
OG0000812	Wa8730a001g007590	AT5G58290.1,AT2G18330.1	Ms05t120620.1,Ms03t050320.1,Ms09t251940.1,Ms04t089540.1,Ms07t196020.1,Ms03t058890.1,Ms04t083370.1	CKAN_01133700,CKAN_00370800,CKAN_02516800	COCNU_HT001RO01_01T008700,COCNU_HT001RO01_11T009340,COCNU_HT001RO01_02T019460,COCNU_HT001RO01_01T005430	lm5633.a03.2.g08190_p1	LOC_Os07g49150.1,LOC_Os01g62500.1,LOC_Os03g18690.1,LOC_Os02g54340.1,LOC_Os09g38730.1	Glyma.08G224500.1,Glyma.07G002200.1,Glyma.12G079202.1	Zm00001e011018_T001,Zm00001e001356_T001,Zm00001e014107_T001,Zm00001e035935_T001	Zosma03g12560,Zosma05g26200,Zosma02g16590,Zosma02g23520	GO:1901800, GO:0036402, GO:0045899	positive regulation of proteasomal protein catabolic process, proteasome-activating ATPase activity, positive regulation of RNA polymerase II transcription preinitiation complex assembly
OG0000813	Wa8730a001g007600	AT1G10040.1,AT4G25770.1	Ms05t120850.1,Ms09t252260.1,Ms07t185610.1,Ms03t076290.1,Ms04t111960.1	CKAN_01122600,CKAN_02053100,CKAN_00927200	COCNU_HT001RO01_11T012640,COCNU_HT001RO01_01T004550	lm5633.a03.12.g09230_p1	LOC_Os08g34750.1,LOC_Os02g54580.1,LOC_Os03g51670.1	Glyma.04G146800.1,Glyma.06G218100.1	Zm00001e004067_T001,Zm00001e016076_T002	Zosma01g40110,Zosma04g26320	-	0
OG0000815	Wa8730a001g007610	.	.	.	.	.	.	.	.	.
OG0000816	Wa8730a001g007620	AT5G57590.1	Ms11t306230.1	CKAN_02053700	COCNU_HT001RO01_01T008660	lm5633.a03.2.g08220_p1	LOC_Os08g14770.1	Glyma.13G094700.1	.	Zosma03g00050,Zosma02g17780	GO:0009108, GO:0051188, GO:0009102	obsolete coenzyme biosynthetic process, obsolete cofactor biosynthetic process, biotin biosynthetic process
OG0000818	Wa8730a001g007630	AT2G23090.1	.	CKAN_01133600,CKAN_00369200,CKAN_00650800	.	lm5633.a03.2.g08250_p1	.	.	.	Zosma05g26900	-	0
OG0000819	Wa8730a001g007640	AT1G51680.1,AT4G14070.1	Ms11t319670.1,Ms04t089570.1,Ms03t058920.1,Ms01t017810.1,Ms07t183930.1,Ms02t028350.1,Ms09t262230.1,Ms04t083350.1,Ms02t041000.1	CKAN_02054400,CKAN_01300900,CKAN_01960000,CKAN_01623400	COCNU_HT001RO01_01T008610,COCNU_HT001RO01_11T009390,COCNU_HT001RO01_02T019940,COCNU_HT001RO01_01T003860	lm5633.a03.2.g08430_p1	LOC_Os08g34790.1,LOC_Os08g14760.1,LOC_Os02g08100.1,LOC_Os06g44620.1	Glyma.15G001700.1,Glyma.17G064400.1,Glyma.13G095600.2,Glyma.13G323000.1,Glyma.13G372000.1	Zm00001e037698_T001,Zm00001e004061_T001,Zm00001e013798_T002,Zm00001e022313_T002	Zosma01g00600,Zosma06g21680,Zosma05g26650,Zosma02g16770	GO:0010584, GO:0016207, GO:0009699	pollen exine formation, 4-coumarate-CoA ligase activity, phenylpropanoid biosynthetic process
OG0000820	Wa8730a001g007650	.	Ms06t173280.1,Ms01t017620.1	CKAN_00358700	COCNU_HT001RO01_01T007820,COCNU_HT001RO01_11T013530,COCNU_HT001RO01_02T019640	.	LOC_Os04g51830.1,LOC_Os02g07830.1,LOC_Os06g48810.1	Glyma.01G002300.1	Zm00001e007000_T001	.	GO:0030001, GO:0015081, GO:0035725	metal ion transport, sodium ion transmembrane transporter activity, sodium ion transmembrane transport
OG0000821	Wa8730a001g007660	.	Ms07t184360.1,Ms10t269850.1,Ms09t261990.1	.	COCNU_HT001RO01_02T019830	.	.	Glyma.17G194800.1,Glyma.14G137800.1,Glyma.04G077200.1,Glyma.06G078300.1	.	.	-	0
OG0000822	Wa8730a001g007670	AT5G58420.1	Ms11t321640.1,Ms05t143650.1,Ms03t046620.1	.	COCNU_HT001RO01_01T016080	lm5633.a03.2.g07330_p1,lm5633.a03.14.g08650_p1	.	Glyma.03G050300.1,Glyma.01G124300.1,Glyma.14G056900.1,Glyma.02G263200.1	.	Zosma06g21530,Zosma03g18480	GO:0044464, GO:0005737, GO:0044424	obsolete cell part, cytoplasm, obsolete intracellular part
OG0000823	Wa8730a001g007680	AT5G57035.1,AT2G19410.1,AT4G31230.1,AT2G24370.1,AT1G80640.1,AT2G07020.1,AT5G60080.1,AT1G16760.1	Ms05t121090.1,Ms06t173180.1,Ms04t088380.1,Ms10t290810.1,Ms07t185630.1,Ms10t298430.1,Ms10t271700.1,Ms01t000790.1,Ms04t104190.1,Ms10t276200.1,Ms04t112200.1	CKAN_01207000,CKAN_00582900,CKAN_01140700,CKAN_02043200,CKAN_01302100,CKAN_00382200	COCNU_HT001RO01_04T015300,COCNU_HT001RO01_01T007740,COCNU_HT001RO01_11T010130,COCNU_HT001RO01_02T019800,COCNU_HT001RO01_01T003030,COCNU_HT001RO01_01T014960	lm5633.a03.2.g07340_p1,lm5633.a03.14.g08590_p1	LOC_Os06g48590.1,LOC_Os02g54590.1,LOC_Os02g05820.1	Glyma.07G001400.1,Glyma.17G196300.1,Glyma.14G137200.4,Glyma.15G000700.1,Glyma.04G076800.1,Glyma.06G078000.1,Glyma.18G268002.1,Glyma.13G373000.1,Glyma.01G001900.1,Glyma.08G027500.1	Zm00001e023731_T001,Zm00001e037727_T002,Zm00001e036273_T002,Zm00001e013674_T002	Zosma01g00520,Zosma01g40360,Zosma03g01510,Zosma02g16830,Zosma04g26460	GO:0004707, GO:0004675, GO:0007178	MAP kinase activity, transmembrane receptor protein serine/threonine kinase activity, transmembrane receptor protein serine/threonine kinase signaling pathway
OG0000824	Wa8730a001g007690	AT4G31290.1	Ms03t051200.1,Ms07t193700.1,Ms03t059090.1,Ms01t017580.1	CKAN_01140500	COCNU_HT001RO01_01T007760,COCNU_HT001RO01_11T013650	.	LOC_Os02g26700.1	Glyma.04G077300.1,Glyma.06G078400.1	.	Zosma01g00530	GO:0003839, GO:0051186, GO:0006751	gamma-glutamylcyclotransferase activity, obsolete cofactor metabolic process, glutathione catabolic process
OG0000825	Wa8730a001g007700	AT4G31290.1	Ms03t051200.1,Ms07t193700.1,Ms03t059090.1,Ms01t017580.1	CKAN_01140500	COCNU_HT001RO01_01T007760,COCNU_HT001RO01_11T013640	.	LOC_Os02g26700.1	Glyma.04G077300.1,Glyma.06G078400.1	.	Zosma01g00530	GO:0003839, GO:0051186, GO:0006751	gamma-glutamylcyclotransferase activity, obsolete cofactor metabolic process, glutathione catabolic process
OG0000826	Wa8730a001g007710	AT4G31290.1	Ms03t051200.1,Ms07t193700.1,Ms03t059090.1,Ms01t017580.1	CKAN_01140500	COCNU_HT001RO01_01T007760,COCNU_HT001RO01_11T010100	.	LOC_Os02g26700.1	Glyma.04G077300.1,Glyma.06G078400.1	.	Zosma01g00530	GO:0003839, GO:0051186, GO:0006751	gamma-glutamylcyclotransferase activity, obsolete cofactor metabolic process, glutathione catabolic process
OG0000827	Wa8730a001g007720	AT2G19120.1,AT4G30100.1,AT1G16800.2	Ms10t298200.1,Ms04t111940.1	CKAN_02069300	COCNU_HT001RO01_02T019650	lm5633.a03.2.g07390_p1	LOC_Os09g32180.1	Glyma.15G000900.2	.	.	GO:0009863, GO:0000184, GO:0048571	salicylic acid mediated signaling pathway, nuclear-transcribed mRNA catabolic process, nonsense-mediated decay, long-day photoperiodism
OG0000828	Wa8730a001g007730	AT1G16800.1	Ms10t298200.1	CKAN_02069300	COCNU_HT001RO01_02T019650	.	LOC_Os09g32190.1	Glyma.15G000900.1	.	.	-	0
OG0000829	Wa8730a001g007740	.	Ms03t051130.1	.	COCNU_HT001RO01_11T013590	.	.	.	.	.	-	0
OG0000830	Wa8730a001g007750	AT1G07660.1,AT5G59690.1	.	CKAN_01133300,CKAN_02055200,CKAN_01038900,CKAN_00368800,CKAN_02486000,CKAN_01961700,CKAN_01666100	COCNU_HT001RO01_16T007230,COCNU_HT001RO01_01T008570,COCNU_HT001RO01_11T009410,COCNU_HT001RO01_01T003500	lm5633.a03.2.g08300_p1,lm5633.a03.8.g04720_p1,lm5633.a03.12.g09700_p1,lm5633.a03.14.g08010_p1	LOC_Os09g26340.1,LOC_Os01g61920.1,LOC_Os05g38740.1,LOC_Os09g38020.1	.	.	Zosma03g13340,Zosma01g40130,Zosma02g23330	GO:0044454, GO:0031497, GO:0003677	obsolete nuclear chromosome part, chromatin assembly, DNA binding
OG0000831	Wa8730a001g007760	AT5G57380.1,AT2G18880.1,AT4G30200.2	Ms03t050830.1,Ms09t252340.1,Ms04t079960.1	CKAN_01134700,CKAN_00368100,CKAN_00243900	COCNU_HT001RO01_11T012790,COCNU_HT001RO01_01T003020	lm5633.a03.2.g08320_p1,lm5633.a03.2.g17980_p1,lm5633.a03.14.g08130_p1	LOC_Os02g05840.1	Glyma.17G062500.1,Glyma.02G215000.1,Glyma.13G097000.1,Glyma.14G182300.1	Zm00001e040024_T001,Zm00001e013677_T002	Zosma01g00610	GO:0017053, GO:0001666, GO:0010048	transcription repressor complex, response to hypoxia, vernalization response
OG0000832	Wa8730a001g007770	AT2G24490.2,AT3G02920.1	Ms03t050850.1,Ms10t276970.1	CKAN_01209400,CKAN_00367800	COCNU_HT001RO01_11T012810	lm5633.a03.2.g08370_p1,lm5633.a03.2.g17930_p1	.	Glyma.17G202200.1,Glyma.14G133400.1,Glyma.17G062700.10,Glyma.13G096800.1	Zm00001e015194_T001	Zosma03g12570,Zosma01g40160	GO:0044428, GO:0000228, GO:0000278	obsolete nuclear part, nuclear chromosome, mitotic cell cycle
OG0000833	Wa8730a001g007780	.	.	.	.	.	.	.	.	.
OG0000834	Wa8730a001g007790	AT5G11510.1,AT2G23290.1,AT5G02320.2,AT1G16880.1,AT3G09370.1	Ms04t089590.1,Ms10t273990.1,Ms02t028280.1,Ms01t000990.1,Ms04t111840.1,Ms04t083340.1,Ms02t042780.1	CKAN_00584300,CKAN_02057000,CKAN_01040800,CKAN_00281800,CKAN_01240800,CKAN_00652600	COCNU_HT001RO01_01T008480,COCNU_HT001RO01_12T007820,COCNU_HT001RO01_08T004130	lm5633.a03.2.g08380_p1,lm5633.a03.2.g17920_p1	LOC_Os08g14440.2,LOC_Os01g62410.1,LOC_Os05g38460.1	Glyma.08G219100.1,Glyma.17G190900.1,Glyma.14G143400.1,Glyma.15G003200.1,Glyma.04G080600.1,Glyma.06G082300.1,Glyma.13G370200.1,Glyma.07G022700.1	Zm00001e019321_T002,Zm00001e028763_T001	Zosma06g24610,Zosma05g26730,Zosma01g36620	GO:0032465, GO:0009610, GO:0010319	regulation of cytokinesis, response to symbiotic fungus, stromule
OG0000835	Wa8730a001g007800	AT2G18910.1	Ms03t050860.1,Ms09t252360.1,Ms10t291460.1,Ms04t079980.1,Ms10t298050.1,Ms08t230740.1	CKAN_01134800,CKAN_00367500	COCNU_HT001RO01_01T008470,COCNU_HT001RO01_11T009480,COCNU_HT001RO01_01T003730	lm5633.a03.2.g08400_p1,lm5633.a03.2.g17900_p1	LOC_Os02g26370.1	Glyma.17G062100.1,Glyma.13G097500.1	Zm00001e014113_T004,Zm00001e022552_T001	Zosma03g00260	-	0
OG0000836	Wa8730a001g007810	AT3G57170.1	.	CKAN_00278100,CKAN_01238500	COCNU_HT001RO01_01T003780	lm5633.a03.2.g08410_p1,lm5633.a03.2.g17870_p1	.	Glyma.03G131800.1	.	Zosma03g00370	GO:0042158, GO:0000506, GO:0006506	lipoprotein biosynthetic process, glycosylphosphatidylinositol-N-acetylglucosaminyltransferase (GPI-GnT) complex, GPI anchor biosynthetic process
OG0000837	Wa8730a001g007820	AT5G57350.1,AT2G18960.1,AT4G30190.1,AT2G24520.2,AT1G80660.1,AT2G07560.1,AT1G17260.1,AT5G62670.1	Ms05t120550.1,Ms09t251910.1,Ms04t087820.1,Ms03t058570.1,Ms10t272840.1,Ms07t198910.1	CKAN_00751400,CKAN_02022400,CKAN_01313800,CKAN_00367000,CKAN_00084600,CKAN_00198500,CKAN_02516500,CKAN_00626600,CKAN_00926900,CKAN_00661100	COCNU_HT001RO01_01T008450,COCNU_HT001RO01_11T012860,COCNU_HT001RO01_01T005500,COCNU_HT001RO01_08T003810	lm5633.a03.2.g08420_p1,lm5633.a03.12.g09360_p1,lm5633.a03.2.g17850_p1	LOC_Os06g08310.1,LOC_Os02g55400.1,LOC_Os04g56160.1	Glyma.08G216500.1,Glyma.13G156000.1,Glyma.17G199200.1,Glyma.14G134100.1,Glyma.15G004300.1,Glyma.17G061800.1,Glyma.13G097900.1,Glyma.09G056300.1,Glyma.15G162600.1,Glyma.04G075100.1,Glyma.06G076100.1,Glyma.13G369300.1,Glyma.07G025900.1,Glyma.15G207900.1,Glyma.06G189900.1,Glyma.04G174800.3,Glyma.17G096100.1	Zm00001e038452_T001,Zm00001e023683_T002,Zm00001e037454_T001,Zm00001e030445_T002,Zm00001e036333_T002,Zm00001e022306_T001,Zm00001e006689_T003	Zosma03g14630,Zosma06g28200,Zosma05g26780,Zosma03g00550,Zosma02g17830,Zosma04g22210	GO:0036442, GO:0015988, GO:0016887	proton-exporting ATPase activity, phosphorylative mechanism, energy coupled proton transmembrane transport, against electrochemical gradient, ATPase activity
OG0000838	Wa8730a001g007830	.	Ms09t252140.1	CKAN_00377000	COCNU_HT001RO01_11T012410	lm5633.a03.2.g08060_p1	LOC_Os09g25650.1	Glyma.15G192400.3	Zm00001e009846_T001	Zosma01g40020	GO:0005887, GO:0032504, GO:0055046	integral component of plasma membrane, multicellular organism reproduction, microgametogenesis
OG0000839	Wa8730a001g007840	AT2G23820.2	Ms07t195900.1,Ms01t017910.1	CKAN_00377100	COCNU_HT001RO01_01T014400	lm5633.a03.2.g08050_p1	LOC_Os02g08260.1	Glyma.17G069700.1,Glyma.02G207900.1,Glyma.02G129200.1	Zm00001e013816_T003	Zosma03g12430,Zosma05g26080	-	0
OG0000840	Wa8730a001g007850	AT4G30510.1	Ms09t252110.1,Ms10t271520.1	CKAN_00378000	COCNU_HT001RO01_11T012380	lm5633.a03.2.g08040_p1	LOC_Os02g54910.1	Glyma.17G070200.9,Glyma.02G207500.2	Zm00001e016098_T004	Zosma03g12480	GO:0000422, GO:0000045, GO:0080025	autophagy of mitochondrion, autophagosome assembly, phosphatidylinositol-3,5-bisphosphate binding
OG0000841	Wa8730a001g007860	.	.	.	.	.	.	.	.	.
OG0000842	Wa8730a001g007870	AT1G16070.1	Ms01t000860.1	CKAN_01131300	COCNU_HT001RO01_01T014420	lm5633.a03.2.g08020_p1	LOC_Os02g08310.1	Glyma.13G371500.1	Zm00001e013819_T001	Zosma01g39960	GO:0043167, GO:0035091, GO:0043168	ion binding, phosphatidylinositol binding, anion binding
OG0000843	Wa8730a001g007880	AT4G30780.1,AT2G24100.1	Ms05t120720.1,Ms03t050510.1,Ms04t089680.1,Ms09t262140.1,Ms06t151380.1,Ms04t083460.1	CKAN_02043300,CKAN_00379200,CKAN_02454800	COCNU_HT001RO01_11T005470,COCNU_HT001RO01_01T004150,COCNU_HT001RO01_01T014790	lm5633.a03.2.g07980_p1,lm5633.a03.12.g08200_p1	LOC_Os06g08740.1,LOC_Os02g55070.1	Glyma.08G220500.5,Glyma.17G071300.1,Glyma.02G206600.1,Glyma.04G156300.1,Glyma.06G223400.1,Glyma.07G021300.1	Zm00001e023711_T001,Zm00001e036297_T002,Zm00001e030742_T001	Zosma04g18160,Zosma06g15930	-	0
OG0000844	Wa8730a001g007890	AT5G10780.1	Ms03t058790.1,Ms07t184170.1	CKAN_01131100	COCNU_HT001RO01_11T005520	lm5633.a03.2.g08010_p1	.	Glyma.17G222100.1	Zm00001e038165_T002	Zosma05g17500	-	0
OG0000845	Wa8730a001g007900	AT1G15520.1,AT2G29940.1	Ms11t320360.1,Ms01t011260.1,Ms10t292430.1,Ms03t046930.1,Ms11t308270.1	CKAN_01211400,CKAN_02657300,CKAN_02450400,CKAN_02514200,CKAN_00678100,CKAN_01651600,CKAN_01538600	COCNU_HT001RO01_12T007200	lm5633.a03.2.g07970_p1,lm5633.a03.14.g06090_p1	LOC_Os01g08260.1	Glyma.17G206300.1,Glyma.14G127800.8,Glyma.18G063400.3,Glyma.14G193300.1,Glyma.03G192600.2,Glyma.20G187400.4	Zm00001e007851_T001,Zm00001e030669_T001	Zosma05g26170,Zosma02g17970	GO:0006855, GO:0016021, GO:0042626	drug transmembrane transport, integral component of membrane, ATPase-coupled transmembrane transporter activity
OG0000847	Wa8730a001g007910	AT5G57900.1,AT4G30640.1	Ms07t194590.1,Ms04t103980.1	CKAN_01130300	COCNU_HT001RO01_01T014630	lm5633.a03.2.g07870_p1	LOC_Os08g16840.1	Glyma.02G205200.1	Zm00001e022266_T001	.	GO:0005622, GO:0019005, GO:0044424	intracellular anatomical structure, SCF ubiquitin ligase complex, obsolete intracellular part
OG0000848	Wa8730a001g007920	AT1G16030.1,AT5G02500.1,AT3G09440.1,AT3G12580.1	Ms05t120670.1,Ms06t178540.1,Ms08t227170.1,Ms04t089000.1,Ms07t193090.1,Ms10t290840.1,Ms10t274130.1,Ms03t073400.1,Ms02t042560.1	CKAN_01032500,CKAN_02477500,CKAN_01943300	COCNU_HT001RO01_16T007720,COCNU_HT001RO01_04T015170,COCNU_HT001RO01_12T007620,COCNU_HT001RO01_04T001980,COCNU_HT001RO01_11T012150,COCNU_HT001RO01_01T004760	lm5633.a03.2.g07880_p1	LOC_Os01g62290.1,LOC_Os05g38530.1,LOC_Os03g50250.1	Glyma.17G072400.2,Glyma.02G205600.1	Zm00001e038476_T001,Zm00001e019334_T002,Zm00001e028777_T001,Zm00001e027239_T002	Zosma06g21400	GO:0009644, GO:0008144, GO:0009615	response to high light intensity, drug binding, response to virus
OG0000849	Wa8730a001g007930	AT4G30690.1,AT2G24060.1	Ms05t120680.1	CKAN_01130800	COCNU_HT001RO01_01T004740	lm5633.a03.2.g07890_p1	LOC_Os02g55120.1	Glyma.17G072300.1,Glyma.02G205700.1,Glyma.04G154000.1	Zm00001e016109_T001	Zosma01g39870	GO:0043022, GO:0032988, GO:0009658	ribosome binding, ribonucleoprotein complex disassembly, chloroplast organization
OG0000850	Wa8730a001g007940	AT4G30710.1,AT2G24070.2,AT5G43160.1	Ms03t057120.1,Ms03t050490.1,Ms07t194180.1,Ms04t103020.1	CKAN_02041200,CKAN_00381000,CKAN_02443500,CKAN_00650100	COCNU_HT001RO01_11T010900	lm5633.a03.2.g07900_p1	LOC_Os09g25500.1	Glyma.17G072000.10,Glyma.02G206000.1,Glyma.06G225100.3	Zm00001e023705_T001,Zm00001e030438_T001,Zm00001e022159_T001,Zm00001e016106_T002	Zosma03g06620,Zosma01g39860	GO:0009960, GO:0005880, GO:0010342	endosperm development, nuclear microtubule, endosperm cellularization
OG0000851	Wa8730a001g007950	AT5G10810.1	Ms04t089690.1,Ms04t083470.1	CKAN_00426500	COCNU_HT001RO01_11T012250	.	LOC_Os04g42134.1,LOC_Os02g39830.1	Glyma.04G060200.1,Glyma.06G060700.2,Glyma.17G224100.1	Zm00001e007678_T001	Zosma02g17790	GO:0010008, -, GO:0048471	endosome membrane, 0, perinuclear region of cytoplasm
OG0000852	Wa8730a001g007960	AT4G30810.1,AT2G24000.1,AT2G05850.1,AT3G07990.1,AT3G02110.1	Ms05t120640.1,Ms09t246420.1,Ms08t227380.1,Ms07t201970.1,Ms10t271770.1,Ms07t199040.1	CKAN_01130900,CKAN_02036300,CKAN_01327800,CKAN_00379500	COCNU_HT001RO01_16T006750,COCNU_HT001RO01_01T004610	lm5633.a03.2.g07930_p1,lm5633.a03.12.g08100_p1	LOC_Os01g61690.1,LOC_Os06g08720.2,LOC_Os01g06490.1,LOC_Os02g55130.1	Glyma.17G073200.1,Glyma.02G204700.1,Glyma.18G266700.1,Glyma.04G155900.1,Glyma.20G178600.1,Glyma.10G212500.1	Zm00001e019384_T002,Zm00001e036298_T003,Zm00001e025826_T002,Zm00001e015200_T001,Zm00001e016112_T002,Zm00001e016843_T001	Zosma05g26280,Zosma05g10880,Zosma01g36780,Zosma05g17740	GO:0071367, GO:0044257, GO:0005615	cellular response to brassinosteroid stimulus, cellular protein catabolic process, extracellular space
OG0000853	Wa8730a001g007970	.	Ms07t185650.1	.	.	.	.	.	.	.	GO:0051188, GO:0009102, GO:0009108	obsolete cofactor biosynthetic process, biotin biosynthetic process, obsolete coenzyme biosynthetic process
OG0000854	Wa8730a001g007980	.	Ms06t172780.1,Ms09t266120.1,Ms06t151630.1	CKAN_02654700	.	.	.	Glyma.19G194500.1	.	Zosma01g17920	GO:0009414, GO:0009738, GO:0071215	response to water deprivation, abscisic acid-activated signaling pathway, cellular response to abscisic acid stimulus
OG0000856	Wa8730a001g007990	AT1G15940.1,AT4G31880.2,AT1G80810.3	Ms03t050050.1,Ms09t251980.1,Ms06t172550.1,Ms10t291980.1	CKAN_02028500	COCNU_HT001RO01_11T011990,COCNU_HT001RO01_01T005200	lm5633.a03.2.g07810_p1,lm5633.a03.14.g06300_p1	LOC_Os04g42320.1,LOC_Os02g39920.1	Glyma.08G217800.3,Glyma.04G061800.1,Glyma.06G062800.3	Zm00001e007658_T002,Zm00001e015094_T002	Zosma03g06350,Zosma01g04220	GO:0051704, -, GO:0050832	multi-organism process, 0, defense response to fungus
OG0000857	Wa8730a001g008000	AT2G25110.1	Ms03t058600.1,Ms03t046820.1,Ms06t151410.1	CKAN_02027300,CKAN_01530600	COCNU_HT001RO01_11T011960,COCNU_HT001RO01_01T005220,COCNU_HT001RO01_11T001720	.	LOC_Os08g34190.1,LOC_Os08g17680.1	Glyma.04G061900.2,Glyma.06G062900.2	Zm00001e004093_T001	Zosma03g06340	GO:0052305, GO:0052033, GO:0052257	induction by symbiont of host innate immune response, obsolete pathogen-associated molecular pattern dependent induction by symbiont of host innate immune response, obsolete pathogen-associated molecular pattern dependent induction by organism of innate immune response of other organism involved in symbiotic interaction
OG0000858	Wa8730a001g008010	AT5G58020.1	Ms07t194300.1,Ms10t291990.1	CKAN_02027200	COCNU_HT001RO01_01T005270	lm5633.a03.2.g07800_p1	LOC_Os06g08490.1	Glyma.17G075400.1,Glyma.02G202400.3	.	Zosma03g06330	-	0
OG0000859	Wa8730a001g008020	AT5G10960.1,AT1G15920.2,AT1G80780.1	Ms05t120580.1,Ms03t050350.1,Ms09t251970.1,Ms04t088540.1,Ms02t029370.1,Ms04t081800.1,Ms01t000720.1,Ms09t261830.1	CKAN_02027500,CKAN_00385400,CKAN_02652000,CKAN_01239200	COCNU_HT001RO01_01T005280,COCNU_HT001RO01_08T003950	lm5633.a03.2.g07790_p1	LOC_Os09g24990.1,LOC_Os08g34170.1,LOC_Os02g55300.1	Glyma.08G217600.4,Glyma.19G197600.1,Glyma.04G062300.1,Glyma.06G063300.1,Glyma.07G024000.1	Zm00001e023692_T002,Zm00001e004094_T001,Zm00001e016122_T001	Zosma03g06320,Zosma01g39770,Zosma06g16020	GO:0000288, GO:0004535, GO:0043928	nuclear-transcribed mRNA catabolic process, deadenylation-dependent decay, poly(A)-specific ribonuclease activity, exonucleolytic catabolism of deadenylated mRNA
OG0000860	Wa8730a001g008030	AT5G58030.1	Ms10t292730.1,Ms09t266010.1	CKAN_02272100	.	.	.	Glyma.18G030800.1,Glyma.11G226500.1	.	Zosma06g16170	-	0
OG0000861	Wa8730a001g008040	AT5G54830.1	Ms02t029330.1,Ms11t306320.1	.	COCNU_HT001RO01_11T005390,COCNU_HT001RO01_01T014840	.	LOC_Os06g44040.1,LOC_Os09g38520.1	.	Zm00001e030439_T002,Zm00001e034891_T001	Zosma05g26700	GO:0044431, GO:0005768, GO:0005802	obsolete Golgi apparatus part, endosome, trans-Golgi network
OG0000862	Wa8730a001g008050	AT2G24280.1	Ms06t173980.1,Ms03t046810.1,Ms11t308120.1	CKAN_01122400,CKAN_02025200,CKAN_02652900	COCNU_HT001RO01_08T003930	.	LOC_Os06g43930.1	Glyma.01G065400.1,Glyma.19G196700.1,Glyma.02G123000.3	Zm00001e037628_T002,Zm00001e030444_T001	Zosma05g18750	GO:0008239, GO:0003085, GO:0060055	dipeptidyl-peptidase activity, negative regulation of systemic arterial blood pressure, angiogenesis involved in wound healing
OG0000863	Wa8730a001g008060	AT5G57580.1,AT4G31000.1,AT2G24300.3,AT5G62570.1	Ms01t011180.1,Ms04t089550.1,Ms01t017820.1,Ms04t079930.1,Ms04t104050.1	CKAN_01217200,CKAN_00559600,CKAN_02053800,CKAN_00370600	COCNU_HT001RO01_01T008650,COCNU_HT001RO01_11T012700,COCNU_HT001RO01_01T003950,COCNU_HT001RO01_11T001680	lm5633.a03.2.g07780_p1,lm5633.a03.14.g07970_p1	LOC_Os02g08120.1	Glyma.09G098700.1,Glyma.13G094800.1	Zm00001e025107_T001,Zm00001e013802_T001	Zosma03g00380,Zosma02g17770	GO:0045824, GO:1902478, GO:1900425	negative regulation of innate immune response, negative regulation of defense response to bacterium, negative regulation of defense response to bacterium
OG0000864	Wa8730a001g008070	AT1G15880.1,AT1G80700.1	Ms07t194370.1,Ms10t292020.1,Ms04t083560.1	CKAN_01128600,CKAN_00386400,CKAN_00410800	COCNU_HT001RO01_11T001640	lm5633.a03.2.g07770_p1	LOC_Os09g24980.1,LOC_Os08g34140.1,LOC_Os08g17610.1	Glyma.08G216900.2,Glyma.07G025200.2	Zm00001e009824_T001	Zosma03g03850,Zosma05g10110	GO:0000139, GO:0060627, GO:0005795	Golgi membrane, regulation of vesicle-mediated transport, Golgi stack
OG0000865	Wa8730a001g008080	AT4G31985.1,AT2G25210.1,AT3G02190.1	Ms09t251920.1,Ms03t058580.1,Ms05t139760.1,Ms01t008810.1,Ms07t198920.1	.	COCNU_HT001RO01_01T005500,COCNU_HT001RO01_08T003800	.	LOC_Os06g08320.1,LOC_Os02g55370.1	Glyma.09G094800.1,Glyma.04G063000.1,Glyma.06G064100.1,Glyma.15G202800.1	Zm00001e023685_T001	Zosma01g39440	GO:0019731, GO:0022625, GO:0002227	antibacterial humoral response, cytosolic large ribosomal subunit, innate immune response in mucosa
OG0000866	Wa8730a001g008090	AT2G24830.1,AT3G09850.1	Ms07t194990.1,Ms04t079810.1	CKAN_02021300	COCNU_HT001RO01_01T004050	lm5633.a03.2.g07750_p1	LOC_Os02g55000.1,LOC_Os08g19170.1	Glyma.13G156900.1,Glyma.17G104500.2	Zm00001e016101_T001	Zosma04g18020,Zosma01g04180	-	0
OG0000867	Wa8730a001g008100	AT5G11040.1	Ms10t297910.1	CKAN_01662400	COCNU_HT001RO01_01T005600	lm5633.a03.2.g07730_p1	LOC_Os04g42370.1	Glyma.17G215700.1	Zm00001e007655_T001	Zosma03g14620	GO:1902410, GO:0000278, GO:0005802	mitotic cytokinetic process, mitotic cell cycle, trans-Golgi network
OG0000868	Wa8730a001g008110	AT5G11060.1,AT4G32040.1,AT5G25220.2	Ms05t120510.1,Ms03t058560.1,Ms01t018730.1,Ms07t184010.1,Ms04t103900.1,Ms10t276080.1	CKAN_02021000,CKAN_00388600	COCNU_HT001RO01_01T010190,COCNU_HT001RO01_11T008230,COCNU_HT001RO01_01T005610	lm5633.a03.2.g07710_p1	LOC_Os02g08544.1,LOC_Os06g43860.1,LOC_Os08g19650.2	Glyma.09G095700.3,Glyma.13G157300.1,Glyma.04G064100.1,Glyma.06G065200.1,Glyma.17G104800.3,Glyma.17G215500.2,Glyma.15G202200.1	Zm00001e037459_T002,Zm00001e025100_T001,Zm00001e013853_T001	Zosma06g24910,Zosma05g26010,Zosma02g17660,Zosma05g18780	GO:0009722, GO:0009727, GO:0071345	detection of cytokinin stimulus, detection of ethylene stimulus, cellular response to cytokine stimulus
OG0000869	Wa8730a001g008120	.	Ms02t029420.1,Ms04t079630.1	CKAN_01127500,CKAN_01381000	.	lm5633.a03.2.g07670_p1	LOC_Os06g43800.1	Glyma.09G093900.1,Glyma.15G200800.1	Zm00001e030450_T001	Zosma03g01920,Zosma06g04440	GO:0009570, GO:0080167, GO:0010287	chloroplast stroma, response to karrikin, plastoglobule
OG0000870	Wa8730a001g008130	AT5G11070.1	Ms04t087980.1,Ms04t103600.1,Ms03t046780.1,Ms09t261860.1	CKAN_02020600	COCNU_HT001RO01_01T010210,COCNU_HT001RO01_11T008210,COCNU_HT001RO01_01T005640	lm5633.a03.14.g06700_p1	LOC_Os02g09050.1,LOC_Os06g43810.1,LOC_Os08g19670.1	Glyma.13G157500.1,Glyma.17G105200.1,Glyma.17G215400.1	Zm00001e037463_T001,Zm00001e030449_T001	Zosma03g01850,Zosma05g18790,Zosma01g04150	GO:0008134, -, GO:0000578	transcription factor binding, 0, embryonic axis specification
OG0000871	Wa8730a001g008140	AT2G18940.1,AT1G15510.1,AT4G31850.1,AT2G03880.1,AT4G26800.1,AT1G09900.1,AT5G64320.1,AT1G55630.1	Ms05t120710.1,Ms03t050110.1,Ms06t173680.1,Ms09t246080.1,Ms01t011170.1,Ms04t089960.1,Ms07t194240.1,Ms10t290800.1,Ms01t018310.1,Ms02t029160.1,Ms04t081660.1,Ms10t298350.1,Ms05t139790.1,Ms03t075270.1,Ms03t047220.1,Ms10t276000.1	CKAN_00211000,CKAN_01215100,CKAN_00558500,CKAN_02019700,CKAN_00367300,CKAN_02655600,CKAN_01946800,CKAN_02448400,CKAN_01614100,CKAN_00197900,CKAN_02507400,CKAN_00428400,CKAN_00278600,CKAN_01659700,CKAN_01532200	COCNU_HT001RO01_16T007630,COCNU_HT001RO01_04T015320,COCNU_HT001RO01_01T008460,COCNU_HT001RO01_12T007820,COCNU_HT001RO01_11T010640,COCNU_HT001RO01_01T004850,COCNU_HT001RO01_11T001910,COCNU_HT001RO01_08T005310	lm5633.a03.2.g07910_p1,lm5633.a03.12.g09500_p1,lm5633.a03.14.g07980_p1	LOC_Os09g25050.1,LOC_Os08g39050.1,LOC_Os01g61630.1,LOC_Os06g08660.1,LOC_Os04g41140.1,LOC_Os02g55020.1,LOC_Os02g27070.1	Glyma.17G197900.1,Glyma.14G134800.1,Glyma.02G174500.1,Glyma.09G056200.1,Glyma.04G060500.4,Glyma.15G162500.1,Glyma.06G061000.1,Glyma.17G102300.4,Glyma.15G202500.1,Glyma.06G189500.1,Glyma.04G175400.1,Glyma.17G094300.1	Zm00001e019387_T001,Zm00001e003447_T001,Zm00001e030419_T001,Zm00001e036301_T001	Zosma03g15050,Zosma01g39850,Zosma03g02340,Zosma05g10120,Zosma01g37080,Zosma05g17890,Zosma06g17110,Zosma04g23570,Zosma03g29250	GO:0080156, GO:0004519, GO:0090305	mitochondrial mRNA modification, endonuclease activity, nucleic acid phosphodiester bond hydrolysis
OG0000872	Wa8730a001g008150	.	Ms05t120210.1,Ms03t058650.1,Ms04t079460.1,Ms05t140750.1,Ms10t276160.1,Ms01t010070.1	CKAN_00751700,CKAN_02030200,CKAN_00383000,CKAN_02487500,CKAN_02441200,CKAN_02509800	COCNU_HT001RO01_16T005990,COCNU_HT001RO01_04T013130,COCNU_HT001RO01_01T012620,COCNU_HT001RO01_11T012050,COCNU_HT001RO01_11T005400,COCNU_HT001RO01_01T005050,COCNU_HT001RO01_01T014830	lm5633.a03.2.g07820_p1,lm5633.a03.12.g08000_p1	LOC_Os08g17400.1,LOC_Os04g39570.1	.	.	Zosma03g12880,Zosma03g06450,Zosma02g17690,Zosma02g07340	GO:0009960, GO:0030010, GO:0009942	endosperm development, establishment of cell polarity, longitudinal axis specification
OG0000873	Wa8730a001g008160	AT5G57950.2	Ms03t050470.1,Ms09t252040.1	CKAN_02030600	COCNU_HT001RO01_01T005030	lm5633.a03.2.g07830_p1	LOC_Os09g25310.1	Glyma.06G219200.1	.	Zosma03g12870	-	0
OG0000874	Wa8730a001g008170	AT5G64470.2	Ms10t272540.1,Ms03t073180.1	CKAN_01377800,CKAN_02650900,CKAN_01943500	COCNU_HT001RO01_16T006540,COCNU_HT001RO01_04T013290	.	LOC_Os01g68630.1	.	Zm00001e030411_T001,Zm00001e022204_T004,Zm00001e006665_T001	Zosma03g12860,Zosma01g36700,Zosma02g23860	GO:0044444, GO:0005794, GO:0012505	obsolete cytoplasmic part, Golgi apparatus, endomembrane system
OG0000875	Wa8730a001g008180	AT2G23990.1	Ms03t058690.1,Ms07t184110.1,Ms10t297590.1,Ms03t073310.1,Ms04t103950.1	CKAN_02033000,CKAN_00382000,CKAN_00680400,CKAN_02267700	COCNU_HT001RO01_11T012090,COCNU_HT001RO01_01T004930,COCNU_HT001RO01_01T015000	.	LOC_Os08g17160.1	Glyma.17G223400.1	.	Zosma06g15990	GO:0044425, GO:0046658, GO:0044459	obsolete membrane part, anchored component of plasma membrane, obsolete plasma membrane part
OG0000876	Wa8730a001g008190	AT1G16010.3,AT1G80900.1,AT5G64560.1	Ms09t252050.1,Ms10t272790.1	CKAN_01119600,CKAN_02035600	COCNU_HT001RO01_01T004910,COCNU_HT001RO01_01T014690	lm5633.a03.2.g07840_p1,lm5633.a03.12.g08080_p1	LOC_Os04g42280.1,LOC_Os06g44150.1	Glyma.15G002700.1,Glyma.13G370900.1	Zm00001e037637_T001,Zm00001e007661_T001,Zm00001e030433_T002	Zosma03g14690,Zosma06g16710	GO:0005773, GO:1903830, GO:0015095	vacuole, magnesium ion transmembrane transport, magnesium ion transmembrane transporter activity
OG0000877	Wa8730a001g008200	AT3G02560.1	Ms05t144670.1	CKAN_01421100	COCNU_HT001RO01_16T006160,COCNU_HT001RO01_04T013370	.	LOC_Os03g18570.1	.	Zm00001e001349_T002	Zosma02g07270	GO:0002181, GO:0032040, GO:0030686	cytoplasmic translation, small-subunit processome, 90S preribosome
OG0000878	Wa8730a001g008210	AT4G30620.1,AT2G24020.1	Ms03t058700.1,Ms04t103970.1	CKAN_02037600	COCNU_HT001RO01_01T014700	lm5633.a03.2.g07850_p1	LOC_Os02g08380.1	Glyma.06G225800.1	Zm00001e025093_T001,Zm00001e013831_T001	Zosma05g17750	GO:0044436, GO:0045037, GO:0009535	obsolete thylakoid part, protein import into chloroplast stroma, chloroplast thylakoid membrane
OG0000879	Wa8730a001g008220	AT5G56120.1	Ms08t231710.1	.	COCNU_HT001RO01_11T006300	lm5633.a03.2.g09190_p1	LOC_Os08g38790.1	Glyma.08G336300.1,Glyma.18G071400.1	Zm00001e003437_T001	Zosma03g28930	-	0
OG0000880	Wa8730a001g008230	AT1G10010.2,AT5G63850.1	Ms03t056230.1,Ms06t170450.1,Ms09t247260.1,Ms05t140760.1	CKAN_01217800,CKAN_01356400,CKAN_01944400,CKAN_00676800,CKAN_02153800,CKAN_00234500	COCNU_HT001RO01_11T006360	.	LOC_Os02g49060.1,LOC_Os04g39489.1,LOC_Os04g41350.1,LOC_Os04g56470.1	Glyma.08G336800.1,Glyma.18G071900.6,Glyma.17G192000.1,Glyma.02G303500.1,Glyma.14G010300.25	Zm00001e015686_T001,Zm00001e007843_T001,Zm00001e022304_T001,Zm00001e006672_T004,Zm00001e030667_T003	Zosma02g20350,Zosma01g39570,Zosma05g11040,Zosma05g18650,Zosma02g23200,Zosma02g06850,Zosma04g23810,Zosma03g29300	GO:1990822, GO:0015809, GO:0015174	basic amino acid transmembrane transport, arginine transport, basic amino acid transmembrane transporter activity
OG0000881	Wa8730a001g008240	AT4G30710.1,AT5G43160.1	Ms03t057120.1,Ms03t050490.1,Ms04t103020.1	CKAN_02041200,CKAN_00381000,CKAN_02443500,CKAN_00650100	COCNU_HT001RO01_01T012780,COCNU_HT001RO01_11T010900,COCNU_HT001RO01_11T006640	lm5633.a03.2.g09180_p1	LOC_Os09g11440.2	.	Zm00001e023705_T001,Zm00001e016106_T002,Zm00001e041622_T001	Zosma03g06620,Zosma02g23220,Zosma02g06530,Zosma03g29180	GO:0010342, GO:0009960, GO:0000226	endosperm cellularization, endosperm development, microtubule cytoskeleton organization
OG0000882	Wa8730a001g008250	.	Ms05t120160.1,Ms10t273060.1,Ms02t029720.1	CKAN_01378100,CKAN_00005200,CKAN_02443600	COCNU_HT001RO01_01T007080,COCNU_HT001RO01_11T006650	lm5633.a03.12.g06030_p1	LOC_Os09g30446.1,LOC_Os06g21360.1,LOC_Os09g11450.2	Glyma.08G324200.1,Glyma.07G270400.2,Glyma.09G018200.1,Glyma.15G124100.1	Zm00001e034497_T004,Zm00001e033711_T002	Zosma06g16580,Zosma05g21690,Zosma01g20200	GO:0098719, GO:1902600, GO:0051453	sodium ion import across plasma membrane, proton transmembrane transport, regulation of intracellular pH
OG0000883	Wa8730a001g008260	.	Ms03t061210.1,Ms02t029710.1,Ms09t259020.1	CKAN_00543700,CKAN_02509100	COCNU_HT001RO01_01T012700,COCNU_HT001RO01_11T006600	lm5633.a03.12.g05750_p1	LOC_Os09g11270.1	.	Zm00001e033703_T001,Zm00001e009622_T004	Zosma03g08820	-	0
OG0000884	Wa8730a001g008270	.	Ms03t049810.1,Ms04t079440.1,Ms10t271860.1	CKAN_02486400	COCNU_HT001RO01_01T012690,COCNU_HT001RO01_11T006580	.	LOC_Os08g39120.1	.	Zm00001e024357_T003	Zosma02g23210,Zosma03g29170	GO:0000790, GO:0031011, GO:0002020	chromatin, Ino80 complex, protease binding
OG0000885	Wa8730a001g008280	.	.	.	.	.	.	.	.	.
OG0000886	Wa8730a001g008290	AT1G16220.1,AT3G02750.2	Ms03t049820.1,Ms06t170320.1,Ms09t246410.1,Ms10t292290.1,Ms03t058540.1,Ms04t079450.1,Ms05t139360.1	CKAN_02040200,CKAN_01359300,CKAN_01329300,CKAN_02441500,CKAN_01614200,CKAN_02509300	COCNU_HT001RO01_01T012680,COCNU_HT001RO01_11T010930,COCNU_HT001RO01_11T006570	lm5633.a03.2.g09110_p1	LOC_Os08g39100.1,LOC_Os06g08140.1,LOC_Os02g27220.1	Glyma.09G249700.1,Glyma.20G248900.1	Zm00001e003454_T001,Zm00001e024356_T001,Zm00001e022616_T001	Zosma03g12800,Zosma06g15960,Zosma02g23620,Zosma01g03800	GO:0005886, GO:0006470, GO:0004721	plasma membrane, protein dephosphorylation, phosphoprotein phosphatase activity
OG0000887	Wa8730a001g008300	AT2G33180.1	Ms06t178470.1	CKAN_02509700	.	.	LOC_Os09g30410.1	Glyma.19G198300.1	Zm00001e010049_T003	.	-	0
OG0000888	Wa8730a001g008310	AT1G15820.1	Ms03t049840.1,Ms06t174180.1,Ms07t198790.1	CKAN_02510400,CKAN_00285300	COCNU_HT001RO01_01T006920	lm5633.a03.2.g09100_p1	LOC_Os06g21590.1,LOC_Os02g10390.1	Glyma.02G309500.1,Glyma.14G003400.1	.	Zosma05g18910	GO:0048037, GO:0019684, GO:0016168	obsolete cofactor binding, photosynthesis, light reaction, chlorophyll binding
OG0000889	Wa8730a001g008320	.	Ms07t195590.1,Ms01t000130.1	CKAN_01360800	COCNU_HT001RO01_01T012850,COCNU_HT001RO01_11T010990	lm5633.a03.2.g09090_p1	LOC_Os06g40740.1	.	Zm00001e037623_T002	Zosma05g21660	-	0
OG0000891	Wa8730a001g008330	AT1G55670.1	Ms05t120230.1,Ms03t049860.1	CKAN_01361100	.	lm5633.a03.2.g09050_p1	LOC_Os09g30340.1	.	Zm00001e034484_T001,Zm00001e010044_T001	Zosma04g17820	GO:0050821, GO:0042550, GO:0030093	protein stabilization, photosystem I stabilization, chloroplast photosystem I
OG0000892	Wa8730a001g008340	.	.	.	.	.	.	.	.	.
OG0000893	Wa8730a001g008350	.	Ms03t075480.1	CKAN_00208200	.	.	.	Glyma.19G142000.1,Glyma.03G138900.1	.	.	GO:0045893, GO:0001067, GO:0044212	positive regulation of transcription, DNA-templated, regulatory region nucleic acid binding, transcription regulatory region sequence-specific DNA binding
OG0000894	Wa8730a001g008360	.	.	CKAN_00543400	.	lm5633.a03.2.g09070_p1	LOC_Os08g38890.1	.	Zm00001e010045_T002	Zosma03g08640	GO:0006997, GO:0009504, GO:0046982	nucleus organization, cell plate, protein heterodimerization activity
OG0000895	Wa8730a001g008370	AT5G55200.1,AT4G26780.1	Ms05t143740.1	CKAN_00472700	COCNU_HT001RO01_08T005160	lm5633.a03.2.g09040_p1	LOC_Os09g11250.1	Glyma.08G322000.1,Glyma.02G294600.4	Zm00001e009621_T001,Zm00001e022223_T003	.	GO:0008144, GO:0005740, GO:0009411	drug binding, mitochondrial envelope, response to UV
OG0000896	Wa8730a001g008380	.	Ms03t049720.1,Ms07t182020.1	CKAN_00473000	COCNU_HT001RO01_01T012520	lm5633.a03.2.g09030_p1	LOC_Os02g48850.1	Glyma.07G265000.1,Glyma.09G009700.1,Glyma.08G147700.1,Glyma.15G114000.1,Glyma.16G085600.1	.	Zosma03g15670	-	0
OG0000897	Wa8730a001g008390	AT5G55230.1,AT4G26760.1	Ms03t061150.1,Ms09t255710.1,Ms07t185060.1,Ms04t081570.1,Ms04t103010.1	CKAN_00002100,CKAN_00286000	COCNU_HT001RO01_01T012510,COCNU_HT001RO01_11T010870,COCNU_HT001RO01_11T006680,COCNU_HT001RO01_01T016820	lm5633.a03.2.g09020_p1	LOC_Os06g40840.1,LOC_Os02g48830.1,LOC_Os06g20370.1	Glyma.08G322233.1,Glyma.02G295100.1,Glyma.14G018300.2	Zm00001e036911_T002,Zm00001e030545_T001,Zm00001e031020_T001	Zosma04g17820,Zosma01g03890,Zosma06g05690	GO:0015630, GO:0030981, GO:0055028	microtubule cytoskeleton, cortical microtubule cytoskeleton, cortical microtubule
OG0000898	Wa8730a001g008400	AT4G26750.1	Ms03t056300.1,Ms09t251410.1,Ms09t257160.1	CKAN_00473100	COCNU_HT001RO01_01T012500	lm5633.a03.2.g09800_p1	LOC_Os06g20390.1	Glyma.02G295200.1,Glyma.14G018200.1	Zm00001e036912_T001,Zm00001e031021_T002	Zosma03g08850,Zosma01g37660	GO:0016192, GO:1903335, GO:0032504	vesicle-mediated transport, regulation of vacuolar transport, multicellular organism reproduction
OG0000899	Wa8730a001g008410	AT4G12610.1	.	CKAN_00002200	.	lm5633.a03.2.g08980_p1	.	Glyma.09G009900.1,Glyma.15G114200.3	.	.	GO:0005488, GO:0008022, GO:0003674	binding, protein C-terminus binding, molecular_function
OG0000900	Wa8730a001g008420	AT5G55280.1	Ms07t185090.1,Ms07t182250.1	CKAN_00002700	COCNU_HT001RO01_01T006840,COCNU_HT001RO01_11T010810	lm5633.a03.2.g09830_p1	LOC_Os04g56970.2	Glyma.08G322800.1,Glyma.02G295800.1,Glyma.14G017600.1	Zm00001e006634_T001	Zosma03g08880	GO:0009902, GO:0003924, GO:0009637	chloroplast relocation, GTPase activity, response to blue light
OG0000901	Wa8730a001g008430	AT5G55310.1,AT4G26701.1	.	.	COCNU_HT001RO01_01T006840,COCNU_HT001RO01_11T010800	lm5633.a03.2.g10050_p1	.	.	.	Zosma01g39590	GO:0003917, GO:0006338, GO:0031298	DNA topoisomerase type I (single strand cut, ATP-independent) activity, chromatin remodeling, replication fork protection complex
OG0000902	Wa8730a001g008440	AT5G55390.1,AT5G48090.2	Ms04t088440.1	CKAN_00003300,CKAN_00473700	COCNU_HT001RO01_11T010780	lm5633.a03.2.g10060_p1	LOC_Os08g39250.1	Glyma.08G323700.1,Glyma.02G296200.1	Zm00001e033687_T001,Zm00001e024361_T001	Zosma03g14480	GO:1900111, GO:0070829, GO:0031937	positive regulation of histone H3-K9 dimethylation, heterochromatin maintenance, positive regulation of chromatin silencing
OG0000903	Wa8730a001g008450	AT5G55390.3,AT5G48090.1	Ms04t088440.1	CKAN_00003300,CKAN_00473800	COCNU_HT001RO01_01T012410,COCNU_HT001RO01_11T010780	.	.	Glyma.08G323800.2,Glyma.02G296200.1	Zm00001e024361_T001	Zosma03g14480	GO:1900111, GO:0070829, GO:0031937	positive regulation of histone H3-K9 dimethylation, heterochromatin maintenance, positive regulation of chromatin silencing
OG0000904	Wa8730a001g008460	.	Ms01t009980.1	CKAN_01612000	.	lm5633.a03.12.g06470_p1	LOC_Os01g68589.1	Glyma.08G324100.1,Glyma.20G248700.1	.	.	GO:0071446, GO:0005504, GO:0009862	cellular response to salicylic acid stimulus, fatty acid binding, systemic acquired resistance, salicylic acid mediated signaling pathway
OG0000905	Wa8730a001g008470	.	Ms03t057090.1,Ms01t012220.1,Ms07t185110.1,Ms03t075850.1	.	COCNU_HT001RO01_01T007050,COCNU_HT001RO01_11T010760,COCNU_HT001RO01_11T006770	lm5633.a03.2.g10120_p1	LOC_Os08g39310.1,LOC_Os04g56980.1	Glyma.08G324000.1,Glyma.07G265400.1	Zm00001e024365_T001,Zm00001e006633_T001	Zosma03g08440,Zosma03g02360	GO:0044428, GO:0045943, GO:0000500	obsolete nuclear part, positive regulation of transcription by RNA polymerase I, RNA polymerase I upstream activating factor complex
OG0000906	Wa8730a001g008480	AT2G04740.1	Ms03t049690.1	.	COCNU_HT001RO01_01T012400	lm5633.a03.2.g10110_p1	LOC_Os06g21330.1	.	Zm00001e031022_T001	.	GO:0030162, GO:0019005, GO:0031625	regulation of proteolysis, SCF ubiquitin ligase complex, ubiquitin protein ligase binding
OG0000907	Wa8730a001g008490	AT2G42280.1,AT1G51140.1	Ms03t056410.1,Ms09t266740.1,Ms05t139310.1	CKAN_00210400,CKAN_01157500,CKAN_00093200,CKAN_00628900	.	lm5633.a03.14.g06210_p1,lm5633.a03.12.g06410_p1	LOC_Os09g31300.1,LOC_Os08g39630.1,LOC_Os01g67480.1,LOC_Os04g41229.1,LOC_Os02g39140.1	Glyma.19G144200.1,Glyma.08G152500.2,Glyma.12G238700.1,Glyma.03G141700.2,Glyma.15G271900.3,Glyma.20G248100.1	Zm00001e034528_T002,Zm00001e010060_T001,Zm00001e015045_T002	Zosma03g07660,Zosma05g10890,Zosma06g16230,Zosma02g23420	GO:0001228, GO:0001046, GO:0001047	DNA-binding transcription activator activity, RNA polymerase II-specific, core promoter sequence-specific DNA binding, core promoter sequence-specific DNA binding
OG0000908	Wa8730a001g008500	.	Ms07t181050.1	CKAN_00210200,CKAN_00628700	COCNU_HT001RO01_01T011970	lm5633.a03.2.g10310_p1	LOC_Os08g39600.1	Glyma.08G152700.1	Zm00001e003528_T003	Zosma05g21390	-	0
OG0000909	Wa8730a001g008510	.	.	.	.	.	.	.	.	.
OG0000910	Wa8730a001g008520	AT3G57810.2	Ms05t140730.1	CKAN_00209900,CKAN_00093100	COCNU_HT001RO01_01T011950	lm5633.a03.2.g10300_p1	LOC_Os09g31280.1,LOC_Os08g39560.1,LOC_Os01g67490.1	Glyma.10G093300.4,Glyma.20G188400.1	Zm00001e003526_T001,Zm00001e010059_T003	Zosma01g39650	GO:0044444, GO:0009507, -	obsolete cytoplasmic part, chloroplast, 0
OG0000911	Wa8730a001g008530	AT5G48560.1,AT2G42300.1,AT3G57800.2,AT1G73830.1,AT4G12090.1,AT3G12180.1,AT5G62610.2	Ms03t055920.1,Ms03t061180.1,Ms06t178490.1,Ms06t170180.1,Ms01t012270.1,Ms09t256960.1,Ms09t267040.1,Ms07t185150.1,Ms05t139320.1,Ms07t181760.1,Ms01t000250.1,Ms08t230500.1,Ms04t102960.1,Ms09t261710.1	CKAN_00209700,CKAN_01382600,CKAN_01157400,CKAN_00086200,CKAN_01610300,CKAN_00628500	COCNU_HT001RO01_01T011940,COCNU_HT001RO01_11T010630,COCNU_HT001RO01_11T006920	lm5633.a03.2.g10290_p1	LOC_Os06g41060.1,LOC_Os01g68700.1,LOC_Os06g04500.1	Glyma.19G143900.1,Glyma.02G175400.10,Glyma.10G093400.2,Glyma.03G141200.1,Glyma.16G087300.1,Glyma.08G294000.1,Glyma.06G188100.1,Glyma.04G176900.1,Glyma.17G095000.1	Zm00001e037598_T001,Zm00001e030519_T003	Zosma03g07730,Zosma03g03970,Zosma06g05440	GO:0009911, GO:0003700, GO:0009637	positive regulation of flower development, DNA-binding transcription factor activity, response to blue light
OG0000912	Wa8730a001g008540	AT5G13230.1,AT1G16270.1,AT1G80550.1,AT1G10330.1	Ms03t057030.1,Ms03t049980.1,Ms06t170160.1,Ms01t011710.1,Ms03t059670.1,Ms05t143810.1,Ms09t256050.1,Ms10t272820.1,Ms09t266620.1,Ms07t184000.1,Ms04t081340.1,Ms05t139220.1,Ms07t181090.1,Ms08t231190.1,Ms03t075760.1,Ms03t046790.1,Ms06t151280.1	CKAN_00211000,CKAN_00562200,CKAN_01127900,CKAN_01361000,CKAN_00388800,CKAN_00474300,CKAN_02656900,CKAN_01956100,CKAN_02439600,CKAN_00087900,CKAN_01424400,CKAN_00676200,CKAN_00628100,CKAN_01670200,CKAN_02160000,CKAN_01235800	COCNU_HT001RO01_16T008460,COCNU_HT001RO01_14T001710,COCNU_HT001RO01_01T013220,COCNU_HT001RO01_04T002300,COCNU_HT001RO01_11T010640,COCNU_HT001RO01_11T006230,COCNU_HT001RO01_01T005630,COCNU_HT001RO01_11T000880,COCNU_HT001RO01_08T005310,COCNU_HT001RO01_01T014600	lm5633.a03.2.g10260_p1,lm5633.a03.12.g05730_p1	LOC_Os06g41040.1,LOC_Os01g62910.1,LOC_Os03g60150.1,LOC_Os02g07790.1,LOC_Os04g39410.1,LOC_Os01g68524.1,LOC_Os04g41120.1,LOC_Os06g43840.1,LOC_Os01g08120.1	Glyma.19G141800.1,Glyma.09G251000.2,Glyma.14G003000.1,Glyma.02G174500.1,Glyma.06G206900.1,Glyma.10G093801.1	Zm00001e034564_T001,Zm00001e037600_T001,Zm00001e025127_T001,Zm00001e003562_T001,Zm00001e009596_T001,Zm00001e041608_T002	Zosma04g16380,Zosma03g14820,Zosma03g07320,Zosma03g04540,Zosma01g40090,Zosma03g02280,Zosma05g10100,Zosma01g37300,Zosma01g20160,Zosma04g23400,Zosma06g05370,Zosma03g28780	GO:0004519, GO:0080156, GO:0090305	endonuclease activity, mitochondrial mRNA modification, nucleic acid phosphodiester bond hydrolysis
OG0000913	Wa8730a001g008550	.	.	.	.	.	.	.	.	.
OG0000914	Wa8730a001g008560	AT5G12950.1	Ms10t273110.1,Ms09t266580.1,Ms07t181070.1,Ms09t258980.1	CKAN_00209400,CKAN_01157200,CKAN_00627800	COCNU_HT001RO01_11T010660	lm5633.a03.2.g10230_p1,lm5633.a03.12.g06310_p1	LOC_Os06g41020.1,LOC_Os02g10190.1	Glyma.15G033000.1	Zm00001e037602_T004,Zm00001e025030_T002,Zm00001e015005_T001	Zosma05g21470	-	0
OG0000915	Wa8730a001g008570	AT5G48240.1	.	.	.	lm5633.a03.2.g10220_p1	.	.	.	.
OG0000916	Wa8730a001g008580	AT1G51200.1,AT3G12630.1	Ms03t056370.1,Ms09t246550.1,Ms01t012260.1,Ms09t257200.1,Ms09t266570.1,Ms07t185140.1,Ms04t102970.1,Ms09t261740.1	CKAN_01157000,CKAN_02655900,CKAN_01426600,CKAN_00627300	COCNU_HT001RO01_14T000720,COCNU_HT001RO01_01T012060,COCNU_HT001RO01_11T010670,COCNU_HT001RO01_11T006860	lm5633.a03.2.g10190_p1,lm5633.a03.12.g06270_p1	LOC_Os06g41010.1,LOC_Os09g31200.1,LOC_Os08g39450.1,LOC_Os02g10200.1	Glyma.08G153200.1,Glyma.12G238400.1,Glyma.15G033400.2,Glyma.15G272300.1	Zm00001e037603_T003,Zm00001e025028_T001,Zm00001e003512_T001,Zm00001e014082_T001,Zm00001e022649_T001	Zosma03g07840,Zosma05g10280	GO:0006970, GO:0051865, GO:0009414	response to osmotic stress, protein autoubiquitination, response to water deprivation
OG0000917	Wa8730a001g008590	AT2G03870.2	Ms10t273090.1	.	COCNU_HT001RO01_11T010670,COCNU_HT001RO01_11T006880	.	.	Glyma.12G239000.1	.	Zosma04g23100	GO:0071004, GO:0005688, GO:1990726	U2-type prespliceosome, U6 snRNP, Lsm1-7-Pat1 complex
OG0000918	Wa8730a001g008600	AT5G12890.1,AT1G51210.1,AT1G73880.1,AT1G10400.1,AT5G14860.1	Ms03t055940.1,Ms06t169470.1	CKAN_01212300,CKAN_02048800,CKAN_01401900,CKAN_01609100,CKAN_02164300,CKAN_00234000	COCNU_HT001RO01_01T009050,COCNU_HT001RO01_11T012490,COCNU_HT001RO01_11T005930	lm5633.a03.2.g08080_p1	LOC_Os06g08830.1	Glyma.08G338100.1,Glyma.02G309800.1,Glyma.19G187500.1,Glyma.14G043600.1,Glyma.06G206700.1,Glyma.15G032000.1	Zm00001e037385_T001,Zm00001e009768_T001,Zm00001e034013_T001,Zm00001e014986_T001	Zosma03g04000,Zosma05g18520	GO:0080044, GO:0080046, GO:0080043	quercetin 7-O-glucosyltransferase activity, quercetin 4'-O-glucosyltransferase activity, quercetin 3-O-glucosyltransferase activity
OG0000920	Wa8730a001g008610	.	.	.	.	lm5633.a03.2.g10160_p1	.	Glyma.14G057200.1,Glyma.02G263700.2	.	Zosma03g14580	GO:0000798, GO:0010032, GO:0051754	nuclear cohesin complex, meiotic chromosome condensation, meiotic sister chromatid cohesion, centromeric
OG0000921	Wa8730a001g008620	.	.	.	COCNU_HT001RO01_11T003930	.	.	.	.	.	GO:0046685, GO:0045471, GO:0046688	response to arsenic-containing substance, response to ethanol, response to copper ion
OG0000922	Wa8730a001g008630	.	.	.	.	.	.	.	.	.
OG0000923	Wa8730a001g008640	.	Ms03t057350.1,Ms01t011850.1	CKAN_01958900	.	lm5633.a03.2.g10150_p1	.	Glyma.19G188800.1,Glyma.03G188600.1	.	Zosma02g19920	GO:0010154, GO:0009793, GO:0048316	fruit development, embryo development ending in seed dormancy, seed development
OG0000924	Wa8730a001g008650	AT1G51210.1,AT1G73880.1,AT1G10400.1,AT5G14860.1	Ms03t055940.1,Ms03t061550.1,Ms06t169470.1,Ms06t150940.1	CKAN_01212300,CKAN_02048800,CKAN_01401900,CKAN_01609100,CKAN_01986000,CKAN_02164300,CKAN_00234000	COCNU_HT001RO01_01T009060,COCNU_HT001RO01_11T012490	lm5633.a03.2.g08090_p1	LOC_Os06g08830.1	Glyma.08G338200.1,Glyma.01G067100.2,Glyma.02G309800.1,Glyma.19G187500.1,Glyma.14G043700.1,Glyma.06G206700.1,Glyma.15G032000.1,Glyma.03G187700.1	Zm00001e037385_T001,Zm00001e009769_T001,Zm00001e034013_T001,Zm00001e014986_T002	Zosma03g04000,Zosma05g18520	GO:0080044, GO:0080046, GO:0080043	quercetin 7-O-glucosyltransferase activity, quercetin 4'-O-glucosyltransferase activity, quercetin 3-O-glucosyltransferase activity
OG0000925	Wa8730a001g008660	AT4G12570.1	Ms03t061160.1,Ms05t143870.1	.	COCNU_HT001RO01_01T007030	lm5633.a03.2.g09970_p1	LOC_Os09g31090.2	Glyma.07G265600.1	Zm00001e034510_T002,Zm00001e010055_T002	.	GO:0061630, GO:0042542, GO:0009753	ubiquitin protein ligase activity, response to hydrogen peroxide, response to jasmonic acid
OG0000926	Wa8730a001g008670	AT4G12570.1	.	.	COCNU_HT001RO01_01T012260	lm5633.a03.2.g10130_p1	LOC_Os09g31090.2	.	Zm00001e034510_T001,Zm00001e010055_T001	.	GO:0061630, GO:0042542, GO:0010150	ubiquitin protein ligase activity, response to hydrogen peroxide, leaf senescence
OG0000927	Wa8730a001g008680	AT5G12930.1	.	CKAN_00629000	COCNU_HT001RO01_01T012010	lm5633.a03.2.g10360_p1	LOC_Os09g31350.1	Glyma.15G032500.1	Zm00001e010061_T003	Zosma06g16220	-	0
OG0000928	Wa8730a001g008690	AT5G47960.1,AT1G73640.1,AT1G09630.1,AT5G59150.1,AT2G33870.1,AT3G12160.1	Ms03t057020.1,Ms03t060830.1,Ms06t170620.1,Ms01t012280.1,Ms02t029860.1,Ms05t140420.1,Ms03t047530.1,Ms01t009480.1	CKAN_00210500,CKAN_00563700,CKAN_01352500,CKAN_01157700,CKAN_01941800,CKAN_02436300,CKAN_00093300,CKAN_01611100,CKAN_01987800,CKAN_01659900,CKAN_02165800,CKAN_01539500	COCNU_HT001RO01_16T008530,COCNU_HT001RO01_01T007110,COCNU_HT001RO01_04T002170,COCNU_HT001RO01_11T010610,COCNU_HT001RO01_11T004810	lm5633.a03.12.g06430_p1	LOC_Os01g62950.1,LOC_Os09g10940.1	Glyma.01G080300.1,Glyma.09G003700.1,Glyma.02G176000.1,Glyma.12G238800.1,Glyma.10G092700.1	Zm00001e009615_T001,Zm00001e028750_T001	Zosma04g17790,Zosma03g14540,Zosma03g07650,Zosma03g18710,Zosma01g16650,Zosma02g23350,Zosma02g06760	GO:0042546, GO:0009504, GO:0012505	cell wall biogenesis, cell plate, endomembrane system
OG0000929	Wa8730a001g008700	AT2G42260.1,AT3G57860.1	Ms06t178500.1,Ms05t139300.1,Ms08t230380.1	CKAN_00210600,CKAN_00093400	COCNU_HT001RO01_01T012020	lm5633.a03.2.g10340_p1	LOC_Os04g39670.1	Glyma.19G144400.2,Glyma.03G141800.1	Zm00001e007830_T001,Zm00001e014975_T001	Zosma03g07630	GO:0009553, GO:0000003, GO:0007127	embryo sac development, reproduction, meiosis I
OG0000930	Wa8730a001g008710	AT5G64050.1	Ms08t231420.1	.	COCNU_HT001RO01_08T004730	lm5633.a03.2.g10540_p1	.	.	.	Zosma02g07380	GO:0035670, GO:0006424, GO:0048481	plant-type ovary development, glutamyl-tRNA aminoacylation, plant ovule development
OG0000931	Wa8730a001g008720	.	Ms06t178520.1	CKAN_01614100,CKAN_00683100	.	lm5633.a03.2.g10580_p1	LOC_Os04g39970.1	Glyma.07G018300.1	Zm00001e007821_T002	Zosma03g14590	GO:0003727, GO:1990825, GO:0000373	single-stranded RNA binding, sequence-specific mRNA binding, Group II intron splicing
OG0000932	Wa8730a001g008730	AT5G13230.1,AT2G03880.1,AT1G09410.1,AT5G59200.1	Ms03t057030.1,Ms03t061320.1,Ms03t049980.1,Ms09t248280.1,Ms01t011710.1,Ms04t090200.1,Ms09t266620.1,Ms07t185010.1,Ms04t081340.1,Ms05t139090.1,Ms07t181090.1,Ms08t231190.1,Ms04t103150.1	CKAN_00211000,CKAN_00562200,CKAN_02019200,CKAN_01361000,CKAN_02656900,CKAN_01949200,CKAN_02439600,CKAN_00087900,CKAN_01426500,CKAN_00417900,CKAN_00628100,CKAN_01670200,CKAN_02159800,CKAN_00924900,CKAN_01235800	COCNU_HT001RO01_14T001690,COCNU_HT001RO01_01T013220,COCNU_HT001RO01_12T008610,COCNU_HT001RO01_04T001990,COCNU_HT001RO01_11T011540,COCNU_HT001RO01_11T006230,COCNU_HT001RO01_11T000880,COCNU_HT001RO01_08T004400,COCNU_HT001RO01_01T015590	lm5633.a03.2.g10530_p1	LOC_Os06g41040.1,LOC_Os08g38610.1,LOC_Os01g62910.1,LOC_Os03g60200.1,LOC_Os06g08660.1,LOC_Os01g68524.1,LOC_Os04g41120.1,LOC_Os01g08120.1	Glyma.19G141800.1,Glyma.08G159033.1,Glyma.02G174500.1,Glyma.06G206900.1,Glyma.10G093801.1,Glyma.15G273200.1,Glyma.08G294900.1	Zm00001e034478_T001,Zm00001e037600_T001,Zm00001e003562_T001	Zosma04g17040,Zosma03g14640,Zosma03g07320,Zosma03g18530,Zosma06g19210,Zosma03g01780,Zosma05g10100,Zosma01g38640,Zosma05g20030,Zosma06g16590,Zosma01g20160,Zosma04g23400	GO:0090305, GO:0080156, GO:0003723	nucleic acid phosphodiester bond hydrolysis, mitochondrial mRNA modification, RNA binding
OG0000933	Wa8730a001g008740	.	Ms10t273170.1,Ms05t140690.1	CKAN_00097700	COCNU_HT001RO01_11T000870,COCNU_HT001RO01_08T004530	lm5633.a03.2.g10520_p1	LOC_Os09g31466.1,LOC_Os08g40100.1	Glyma.08G289600.2	Zm00001e034544_T001	Zosma03g07310	-	0
OG0000934	Wa8730a001g008750	.	Ms06t169730.1	CKAN_02048700	.	lm5633.a03.2.g08090_p1	LOC_Os06g08830.1	.	Zm00001e037385_T001	.	GO:0080045, GO:0080044, GO:0080043	quercetin 3'-O-glucosyltransferase activity, quercetin 7-O-glucosyltransferase activity, quercetin 3-O-glucosyltransferase activity
OG0000935	Wa8730a001g008760	.	Ms06t169730.1	.	.	.	.	.	.	.	GO:0080044, GO:0080045, GO:0080046	quercetin 7-O-glucosyltransferase activity, quercetin 3'-O-glucosyltransferase activity, quercetin 4'-O-glucosyltransferase activity
OG0000936	Wa8730a001g008770	.	Ms01t012340.1	CKAN_00213000	COCNU_HT001RO01_01T007300	lm5633.a03.2.g10480_p1	.	Glyma.08G157800.1,Glyma.15G268400.1	.	Zosma05g21230	GO:0009108, GO:0006777, GO:0051188	obsolete coenzyme biosynthetic process, Mo-molybdopterin cofactor biosynthetic process, obsolete cofactor biosynthetic process
OG0000937	Wa8730a001g008780	AT2G05990.1	Ms03t056920.1,Ms01t012300.1,Ms04t102910.1	CKAN_00212600,CKAN_01160300,CKAN_00634200	COCNU_HT001RO01_01T011650,COCNU_HT001RO01_11T007180	lm5633.a03.2.g10460_p1	LOC_Os09g10600.1	.	Zm00001e033661_T002	Zosma03g14960	GO:0016631, GO:0005835, GO:0009941	enoyl-[acyl-carrier-protein] reductase activity, fatty acid synthase complex, chloroplast envelope
OG0000938	Wa8730a001g008790	AT1G51130.1	Ms04t086570.1,Ms09t257340.1,Ms04t102920.1	CKAN_00216300,CKAN_00096700,CKAN_00634100	COCNU_HT001RO01_01T011640,COCNU_HT001RO01_11T010430,COCNU_HT001RO01_11T007170	lm5633.a03.14.g06340_p1	LOC_Os06g41380.1,LOC_Os08g40010.1,LOC_Os02g10090.1	Glyma.03G144100.1,Glyma.20G247200.1	Zm00001e025038_T002,Zm00001e030510_T001,Zm00001e034241_T001	Zosma03g07500	GO:1905623, -, GO:1900057	positive regulation of leaf development, 0, positive regulation of leaf senescence
OG0000939	Wa8730a001g008800	AT5G13020.1,AT3G12140.3	Ms03t056940.1,Ms04t090130.1,Ms07t185200.1,Ms04t081550.1	CKAN_01159900,CKAN_00096600,CKAN_01427100,CKAN_00633700	COCNU_HT001RO01_01T007250,COCNU_HT001RO01_11T010450	lm5633.a03.2.g10450_p1,lm5633.a03.14.g06300_p1	LOC_Os08g39970.1,LOC_Os09g10710.3	Glyma.09G000500.2,Glyma.08G149700.3,Glyma.02G178800.9,Glyma.12G240400.1,Glyma.15G269700.3,Glyma.20G246900.6	Zm00001e034540_T003,Zm00001e033656_T003,Zm00001e024387_T001,Zm00001e010070_T001,Zm00001e022216_T004	Zosma04g17950,Zosma03g12980	GO:0010228, GO:0051704, GO:0050832	vegetative to reproductive phase transition of meristem, multi-organism process, defense response to fungus
OG0000940	Wa8730a001g008810	.	Ms03t056960.1,Ms03t049550.1,Ms09t251180.1,Ms03t074480.1	CKAN_00633300	COCNU_HT001RO01_01T007200	lm5633.a03.12.g06760_p1	LOC_Os08g39960.1	.	Zm00001e003547_T001	Zosma05g21280	GO:0050662, GO:0048037, GO:0004316	obsolete coenzyme binding, obsolete cofactor binding, 3-oxoacyl-[acyl-carrier-protein] reductase (NADPH) activity
OG0000941	Wa8730a001g008820	AT2G04160.1,AT2G05920.1,AT5G59190.1	Ms03t056780.1,Ms09t248420.1,Ms04t088480.1,Ms07t184970.1,Ms04t079580.1,Ms06t151020.1,Ms09t259050.1	CKAN_01366800,CKAN_02656300,CKAN_00100600	COCNU_HT001RO01_01T013190,COCNU_HT001RO01_11T010200,COCNU_HT001RO01_11T001100	lm5633.a03.2.g09360_p1,lm5633.a03.14.g06540_p1	LOC_Os06g40700.1,LOC_Os09g30250.1,LOC_Os02g10520.1	Glyma.07G269700.1,Glyma.09G243700.1,Glyma.14G048000.1	Zm00001e034476_T003,Zm00001e033754_T001,Zm00001e037626_T001,Zm00001e030502_T001,Zm00001e022193_T001,Zm00001e014044_T001,Zm00001e034269_T001	Zosma03g13240,Zosma03g08890,Zosma06g16390	GO:0010102, GO:0048527, GO:0004252	lateral root morphogenesis, lateral root development, serine-type endopeptidase activity
OG0000942	Wa8730a001g008830	.	Ms09t248020.1	CKAN_00390900	COCNU_HT001RO01_01T017620	lm5633.a03.2.g07680_p1	.	.	.	.	-	0
OG0000943	Wa8730a001g008840	.	Ms03t049840.1,Ms09t266480.1	CKAN_00100400	COCNU_HT001RO01_01T006920	lm5633.a03.2.g11740_p1	LOC_Os02g10390.3	Glyma.02G309500.1	Zm00001e033739_T001,Zm00001e025141_T001	Zosma05g18910	GO:0019684, GO:0009768, GO:0031409	photosynthesis, light reaction, photosynthesis, light harvesting in photosystem I, pigment binding
OG0000944	Wa8730a001g008850	AT4G38160.4	Ms07t200160.1,Ms06t164270.1	CKAN_00563400	COCNU_HT001RO01_11T001220,COCNU_HT001RO01_08T004200	lm5633.a03.2.g11730_p1	LOC_Os08g40430.1	.	.	Zosma03g06970,Zosma03g01990	GO:0010467, GO:0008033, GO:0003690	gene expression, tRNA processing, double-stranded DNA binding
OG0000945	Wa8730a001g008860	AT4G38150.1,AT2G06000.1	Ms09t247740.1,Ms04t089960.1,Ms07t200170.1,Ms08t230300.1,Ms03t047220.1,Ms06t172870.1	CKAN_01215100,CKAN_01403500,CKAN_01947400,CKAN_00105500,CKAN_01425300,CKAN_00417900,CKAN_00286700,CKAN_01659700	COCNU_HT001RO01_11T004750,COCNU_HT001RO01_11T001230,COCNU_HT001RO01_08T004190	lm5633.a03.2.g11720_p1,lm5633.a03.12.g07010_p1	LOC_Os04g41140.1	Glyma.19G190733.1,Glyma.03G190300.1	.	Zosma03g09150,Zosma03g04420,Zosma01g39890,Zosma01g16470,Zosma05g18840	GO:0004519, GO:0003723, GO:0090305	endonuclease activity, RNA binding, nucleic acid phosphodiester bond hydrolysis
OG0000946	Wa8730a001g008870	AT1G51410.1,AT1G09510.1,AT5G42800.1	Ms08t230110.1,Ms04t102860.1,Ms06t164280.1	CKAN_00213700,CKAN_00102700	COCNU_HT001RO01_01T007420,COCNU_HT001RO01_11T010250,COCNU_HT001RO01_08T004180	lm5633.a03.2.g11710_p1,lm5633.a03.14.g06480_p1	LOC_Os09g32020.1,LOC_Os08g40440.1,LOC_Os03g60380.1	Glyma.01G080700.1,Glyma.13G369800.1	Zm00001e034561_T003,Zm00001e037563_T001,Zm00001e010076_T003	Zosma03g12930,Zosma01g39720,Zosma03g01970	GO:0010584, GO:0085029, GO:0080110	pollen exine formation, extracellular matrix assembly, sporopollenin biosynthetic process
OG0000947	Wa8730a001g008880	.	.	CKAN_01213700,CKAN_01406200	.	lm5633.a03.2.g07660_p1	LOC_Os09g32025.1	.	Zm00001e010081_T001	.	-	0
OG0000948	Wa8730a001g008890	AT5G55840.1,AT1G80550.1,AT5G14820.1	Ms03t060550.1,Ms07t200590.1,Ms03t059670.1	CKAN_01215100,CKAN_02019700,CKAN_01018000,CKAN_00627500	COCNU_HT001RO01_11T000800,COCNU_HT001RO01_01T017640	lm5633.a03.2.g07700_p1	LOC_Os04g41140.1	Glyma.13G367800.2	.	Zosma03g04190,Zosma01g39850,Zosma06g19310,Zosma03g01890	GO:0004519, GO:0009451, GO:0090305	endonuclease activity, RNA modification, nucleic acid phosphodiester bond hydrolysis
OG0000949	Wa8730a001g008900	AT5G25270.1	Ms03t074410.1,Ms05t136230.1	CKAN_02019600,CKAN_02161200	COCNU_HT001RO01_01T010250	lm5633.a03.2.g07690_p1	LOC_Os08g19830.1	Glyma.17G106000.7	Zm00001e006652_T003	Zosma05g18820	GO:0006915, GO:0061024, GO:0007399	apoptotic process, membrane organization, nervous system development
OG0000950	Wa8730a001g008910	.	Ms09t266590.1,Ms08t230330.1,Ms06t163780.1	CKAN_00213600,CKAN_01354400,CKAN_00099000,CKAN_00683500,CKAN_01662600,CKAN_01540200	COCNU_HT001RO01_01T007410,COCNU_HT001RO01_11T010220,COCNU_HT001RO01_11T001080,COCNU_HT001RO01_08T004340	lm5633.a03.2.g11840_p1,lm5633.a03.12.g07050_p1	LOC_Os02g48290.1,LOC_Os06g22140.1	Glyma.01G062300.2,Glyma.02G120500.2	Zm00001e015632_T001,Zm00001e037573_T001,Zm00001e030504_T002,Zm00001e031029_T002	Zosma03g13110,Zosma03g02090,Zosma05g18930	GO:0004791, GO:0051781, GO:0098869	thioredoxin-disulfide reductase activity, positive regulation of cell division, cellular oxidant detoxification
OG0000951	Wa8730a001g008920	AT4G38200.1	Ms01t000020.1,Ms06t163610.1,Ms05t136080.1	CKAN_00098300	COCNU_HT001RO01_01T007400	lm5633.a03.2.g11780_p1	LOC_Os02g10040.1	Glyma.02G312200.1,Glyma.14G000300.1	Zm00001e037574_T001,Zm00001e025045_T001	Zosma03g14560,Zosma03g18540,Zosma03g02110	GO:0051020, GO:2000114, GO:0012505	GTPase binding, regulation of establishment of cell polarity, endomembrane system
OG0000952	Wa8730a001g008930	AT5G42820.1	Ms09t251120.1	CKAN_00100000	COCNU_HT001RO01_08T004700	lm5633.a03.2.g10650_p1	LOC_Os09g31482.1	Glyma.19G191100.1,Glyma.03G190600.1	Zm00001e034547_T001	Zosma02g23260,Zosma01g04060	GO:0005681, GO:0030628, GO:0089701	spliceosomal complex, pre-mRNA 3'-splice site binding, U2AF complex
OG0000953	Wa8730a001g008940	.	.	.	.	.	.	.	.	.
OG0000954	Wa8730a001g008950	AT4G38190.1,AT3G03050.1,AT2G33100.2	Ms09t251020.1,Ms09t247650.1,Ms04t089980.1,Ms03t059650.1,Ms09t257640.1,Ms02t029810.1,Ms07t181100.1,Ms09t259070.1	CKAN_01155300,CKAN_00103100,CKAN_01623600,CKAN_01414600,CKAN_00683700,CKAN_00925800	COCNU_HT001RO01_01T007920,COCNU_HT001RO01_11T005910,COCNU_HT001RO01_11T001380,COCNU_HT001RO01_08T005270	lm5633.a03.2.g10630_p1	LOC_Os06g22980.1	.	Zm00001e037551_T002,Zm00001e009592_T002	Zosma01g38400	GO:0051301, GO:0009833, GO:0000281	cell division, plant-type primary cell wall biogenesis, mitotic cytokinesis
OG0000955	Wa8730a001g008960	AT5G12970.1,AT5G48060.1,AT3G57880.1,AT1G51570.1	Ms03t056430.1,Ms03t061710.1,Ms01t012090.1	CKAN_00093900,CKAN_01416900,CKAN_00631200,CKAN_00921800	COCNU_HT001RO01_01T006960,COCNU_HT001RO01_11T010530,COCNU_HT001RO01_11T006980,COCNU_HT001RO01_08T003870	lm5633.a03.2.g10370_p1,lm5633.a03.14.g06230_p1,lm5633.a03.12.g06550_p1	LOC_Os06g41090.1,LOC_Os04g39680.1,LOC_Os02g57090.1	Glyma.19G145400.1,Glyma.09G003400.1,Glyma.08G152000.1,Glyma.02G176700.1,Glyma.12G239600.1,Glyma.15G031600.1,Glyma.10G091800.1,Glyma.03G142500.7,Glyma.15G271400.1	Zm00001e037594_T001,Zm00001e030514_T002,Zm00001e007829_T001	Zosma03g07550,Zosma01g39660,Zosma05g11260,Zosma02g23320,Zosma05g21970	GO:0031981, GO:0044422, GO:0005654	nuclear lumen, obsolete organelle part, nucleoplasm
OG0000956	Wa8730a001g008970	AT2G42230.2,AT3G57890.1	Ms03t057010.1,Ms01t012290.1	CKAN_00211300,CKAN_01158700,CKAN_00094300	COCNU_HT001RO01_01T011820,COCNU_HT001RO01_11T007040	lm5633.a03.2.g10380_p1,lm5633.a03.14.g06240_p1	LOC_Os06g41110.1,LOC_Os02g10130.1	Glyma.19G145600.1,Glyma.03G142700.1	Zm00001e025032_T001,Zm00001e030511_T002,Zm00001e014086_T001	Zosma03g14550,Zosma01g04000	-	0
OG0000957	Wa8730a001g008980	AT2G42220.1	Ms09t261680.1	CKAN_00211800	COCNU_HT001RO01_11T010500	lm5633.a03.2.g10390_p1	LOC_Os09g10750.1	Glyma.19G145800.1,Glyma.03G142800.1	Zm00001e033637_T002	Zosma04g17870,Zosma03g13930	GO:0044436, GO:0009534, GO:0009535	obsolete thylakoid part, chloroplast thylakoid, chloroplast thylakoid membrane
OG0000958	Wa8730a001g008990	AT2G42200.1,AT3G57920.1,AT2G33810.1	Ms03t056470.1,Ms07t200000.1,Ms09t257280.1,Ms09t266650.1,Ms04t079300.1,Ms07t181030.1,Ms08t231510.1,Ms06t163910.1,Ms09t261670.1	CKAN_00566300,CKAN_01159300,CKAN_02450300,CKAN_00100800,CKAN_00632600,CKAN_00929300,CKAN_02262100	COCNU_HT001RO01_01T011520,COCNU_HT001RO01_11T010480,COCNU_HT001RO01_11T007100,COCNU_HT001RO01_11T001110,COCNU_HT001RO01_08T004280,COCNU_HT001RO01_01T015660	lm5633.a03.2.g10400_p1,lm5633.a03.12.g07150_p1	LOC_Os09g31438.1,LOC_Os08g39890.1,LOC_Os02g08070.1	Glyma.19G146000.1,Glyma.01G063700.3,Glyma.02G177500.1,Glyma.03G143100.1,Glyma.02G121300.3	Zm00001e034537_T001,Zm00001e025128_T001,Zm00001e013795_T001,Zm00001e003546_T003,Zm00001e024385_T002,Zm00001e030416_T001,Zm00001e010067_T001	Zosma04g17890,Zosma03g13230,Zosma03g02010	GO:1901371, GO:2000024, GO:0048653	regulation of leaf morphogenesis, regulation of leaf development, anther development
OG0000959	Wa8730a001g009000	.	Ms03t056160.1,Ms09t257100.1	.	COCNU_HT001RO01_11T006170	.	LOC_Os06g19640.1	Glyma.09G007400.1,Glyma.15G111800.1	Zm00001e036874_T002	Zosma03g01710	-	0
OG0000960	Wa8730a001g009010	AT2G04160.1,AT2G05920.1,AT5G59090.1	Ms03t056770.1,Ms04t088480.1,Ms09t257390.1,Ms07t184970.1,Ms04t079580.1,Ms06t151020.1,Ms09t259050.1	CKAN_01366800,CKAN_02656300,CKAN_00100600	COCNU_HT001RO01_01T013190,COCNU_HT001RO01_11T010200,COCNU_HT001RO01_11T001100	lm5633.a03.2.g09340_p1,lm5633.a03.14.g06540_p1	LOC_Os06g40700.1,LOC_Os09g30250.1,LOC_Os02g10520.1	Glyma.07G269700.1,Glyma.09G243700.1,Glyma.14G048000.1	Zm00001e034476_T003,Zm00001e033754_T001,Zm00001e037626_T001,Zm00001e025015_T001,Zm00001e030502_T001,Zm00001e022193_T001,Zm00001e014044_T001,Zm00001e034269_T001	Zosma03g13240,Zosma03g08890,Zosma06g16390	GO:0009733, GO:0006508, GO:0004252	response to auxin, proteolysis, serine-type endopeptidase activity
OG0000961	Wa8730a001g009020	.	Ms09t247250.1,Ms04t086210.1,Ms09t257070.1,Ms05t141090.1,Ms05t135990.1	CKAN_00209800,CKAN_01958100	COCNU_HT001RO01_14T000730,COCNU_HT001RO01_11T012610	lm5633.a03.2.g08630_p1,lm5633.a03.14.g06170_p1	.	Glyma.13G005800.1	.	.	GO:0001653, GO:0004383, GO:0006182	peptide receptor activity, guanylate cyclase activity, cGMP biosynthetic process
OG0000962	Wa8730a001g009030	AT2G04160.1,AT2G05920.1,AT5G59090.1	Ms03t056780.1,Ms01t012120.1,Ms04t088480.1,Ms07t184970.1,Ms04t079580.1,Ms06t151020.1,Ms09t259050.1	CKAN_01366800,CKAN_00100600	COCNU_HT001RO01_01T013190,COCNU_HT001RO01_11T010200,COCNU_HT001RO01_11T001100,COCNU_HT001RO01_08T004570	lm5633.a03.2.g09360_p1,lm5633.a03.14.g06540_p1	LOC_Os06g40700.1,LOC_Os09g30250.1,LOC_Os02g10520.1	Glyma.07G269700.1,Glyma.09G243700.1,Glyma.14G048000.1	Zm00001e034476_T003,Zm00001e033754_T001,Zm00001e037626_T001,Zm00001e025015_T001,Zm00001e030502_T001,Zm00001e014044_T001,Zm00001e034269_T001	Zosma03g13240,Zosma03g08890,Zosma06g16390	GO:0004252, GO:0048527, GO:0009733	serine-type endopeptidase activity, lateral root development, response to auxin
OG0000963	Wa8730a001g009040	AT4G26500.1,AT1G55805.1	Ms04t090050.1	CKAN_01949400	COCNU_HT001RO01_01T006680,COCNU_HT001RO01_11T011200	lm5633.a03.2.g09420_p1	.	.	.	.	GO:0009507, GO:0008047, GO:0043085	chloroplast, enzyme activator activity, positive regulation of catalytic activity
OG0000964	Wa8730a001g009050	.	.	.	.	.	.	.	.	.
OG0000965	Wa8730a001g009060	AT3G13227.1,AT5G55980.1	Ms02t029430.1,Ms01t000650.1	CKAN_00392200	COCNU_HT001RO01_01T010280,COCNU_HT001RO01_01T017490	lm5633.a03.2.g09540_p1	LOC_Os02g09090.1,LOC_Os04g42530.1,LOC_Os02g55600.1	Glyma.08G332400.1,Glyma.18G074500.1	Zm00001e037436_T001,Zm00001e030551_T001	Zosma01g36590	-	0
OG0000966	Wa8730a001g009070	AT1G51930.1,AT4G12210.1	Ms03t056090.1,Ms09t266940.1,Ms05t140940.1	CKAN_00544300,CKAN_01372100,CKAN_02650100,CKAN_01626800	COCNU_HT001RO01_01T013650,COCNU_HT001RO01_11T006030	lm5633.a03.2.g09530_p1	LOC_Os09g30160.1,LOC_Os08g38460.1	Glyma.13G009100.1	Zm00001e003426_T001	Zosma01g16710	GO:0009739, GO:1905959, GO:0044257	response to gibberellin, positive regulation of cellular response to alcohol, cellular protein catabolic process
OG0000967	Wa8730a001g009080	AT3G13225.2	Ms03t049710.1,Ms09t251400.1,Ms10t272970.1	CKAN_02434500	COCNU_HT001RO01_01T013390,COCNU_HT001RO01_11T006060	lm5633.a03.2.g09510_p1	LOC_Os06g19470.2	Glyma.08G332700.1,Glyma.18G074300.1,Glyma.01G078400.1	Zm00001e036868_T001,Zm00001e031016_T002	Zosma03g14290	GO:0005654, GO:0044451, GO:0044428	nucleoplasm, obsolete nucleoplasm part, obsolete nuclear part
OG0000968	Wa8730a001g009090	.	Ms05t140770.1	.	COCNU_HT001RO01_01T013380,COCNU_HT001RO01_11T006070	lm5633.a03.2.g09500_p1	LOC_Os06g19480.1	.	Zm00001e036870_T002	Zosma03g09100	-	0
OG0000969	Wa8730a001g009100	AT5G55990.2,AT4G26570.1	Ms09t251600.1,Ms04t086510.1,Ms10t272980.1	CKAN_02434800	COCNU_HT001RO01_01T013360,COCNU_HT001RO01_11T011250	lm5633.a03.2.g09490_p1	.	Glyma.08G332800.2,Glyma.18G074200.4,Glyma.07G269200.1,Glyma.09G016000.6	.	Zosma06g19080,Zosma05g19980	GO:0005513, GO:0055075, GO:0005509	detection of calcium ion, potassium ion homeostasis, calcium ion binding
OG0000970	Wa8730a001g009110	.	Ms08t230440.1	CKAN_02435000	COCNU_HT001RO01_01T013350	lm5633.a03.2.g09440_p1	LOC_Os02g49150.3	Glyma.09G016100.1	Zm00001e023396_T001	Zosma03g14310	-	0
OG0000971	Wa8730a001g009120	AT5G56020.1,AT4G26550.1	Ms03t050000.1,Ms07t184950.1	CKAN_02435100	COCNU_HT001RO01_11T011240,COCNU_HT001RO01_11T006080	lm5633.a03.2.g09400_p1	LOC_Os06g40630.1,LOC_Os06g19620.1	Glyma.08G333100.1,Glyma.18G073700.1	Zm00001e037445_T001	Zosma03g09090	GO:0005795, GO:0000138, GO:0042147	Golgi stack, Golgi trans cisterna, retrograde transport, endosome to Golgi
OG0000972	Wa8730a001g009130	AT3G13229.1,AT5G48270.1,AT2G04220.1,AT4G12690.2	Ms03t057220.1,Ms03t061080.1,Ms03t050300.1,Ms09t251930.1,Ms07t180890.1	CKAN_01371100,CKAN_00386800,CKAN_00261300	COCNU_HT001RO01_11T011230	lm5633.a03.2.g09410_p1	LOC_Os02g10530.1,LOC_Os01g68140.1	.	Zm00001e025013_T002,Zm00001e014042_T001	Zosma03g14320,Zosma03g09080,Zosma06g16040,Zosma02g22860	-	0
OG0000973	Wa8730a001g009140	AT2G04160.1,AT2G05920.1,AT4G26330.2,AT5G59130.4	Ms03t056780.1,Ms10t298280.1,Ms04t088480.1,Ms09t257390.1,Ms07t184970.1,Ms04t079580.1,Ms09t259050.1	CKAN_01366800,CKAN_01013000,CKAN_00100600	COCNU_HT001RO01_01T013190,COCNU_HT001RO01_11T010200,COCNU_HT001RO01_11T001100	lm5633.a03.2.g09340_p1	LOC_Os06g40700.1,LOC_Os09g30250.1,LOC_Os02g10520.1	Glyma.07G269700.1,Glyma.09G243700.1,Glyma.14G048000.1	Zm00001e034476_T003,Zm00001e037626_T001,Zm00001e025015_T001,Zm00001e030502_T001,Zm00001e022193_T001,Zm00001e014044_T001,Zm00001e034269_T001	Zosma03g08890,Zosma06g16390	GO:0006508, GO:0010102, GO:0048527	proteolysis, lateral root morphogenesis, lateral root development
OG0000974	Wa8730a001g009150	.	Ms09t247610.1	CKAN_00286600	.	lm5633.a03.2.g09680_p1	.	.	.	Zosma06g04610	-	0
OG0000975	Wa8730a001g009160	AT1G55830.2	Ms10t272940.1	.	COCNU_HT001RO01_01T013690	lm5633.a03.2.g09690_p1	.	Glyma.18G074900.5	.	.	-	0
OG0000976	Wa8730a001g009170	AT1G07250.1	Ms03t055940.1,Ms09t253260.1,Ms02t029500.1,Ms08t229520.1	CKAN_00552800,CKAN_01382400,CKAN_01986000,CKAN_02161900	COCNU_HT001RO01_01T013500,COCNU_HT001RO01_11T011400,COCNU_HT001RO01_11T005930	lm5633.a03.2.g14800_p1	LOC_Os06g18010.1,LOC_Os04g42690.1	Glyma.01G067100.1	Zm00001e036859_T001,Zm00001e030992_T001	Zosma03g04000	GO:0080043, GO:0047243, GO:0080044	quercetin 3-O-glucosyltransferase activity, flavanone 7-O-beta-glucosyltransferase activity, quercetin 7-O-glucosyltransferase activity
OG0000977	Wa8730a001g009180	AT5G55950.1	Ms03t050030.1,Ms05t139170.1	CKAN_02433400	COCNU_HT001RO01_01T013690,COCNU_HT001RO01_11T013140,COCNU_HT001RO01_11T006000,COCNU_HT001RO01_02T019050	lm5633.a03.2.g09620_p1	LOC_Os02g49260.1,LOC_Os06g19380.1,LOC_Os01g07310.1	Glyma.02G302100.1,Glyma.14G012100.1	Zm00001e015691_T002,Zm00001e031002_T003	Zosma03g14220,Zosma01g36530,Zosma05g22010	GO:0005464, -, GO:0015297	UDP-xylose transmembrane transporter activity, 0, antiporter activity
OG0000978	Wa8730a001g009190	.	Ms03t057250.1,Ms01t012050.1,Ms07t184940.1	CKAN_01214600	COCNU_HT001RO01_01T013710	.	.	.	.	.	-	0
OG0000979	Wa8730a001g009200	AT3G13222.1	Ms03t057250.1,Ms01t012050.1,Ms07t184940.1	CKAN_01214600	COCNU_HT001RO01_01T006480,COCNU_HT001RO01_11T011330	.	.	Glyma.02G302000.1,Glyma.14G012200.2	Zm00001e022213_T001	Zosma03g09200,Zosma03g18440,Zosma05g22020	GO:0042802, GO:0043388, GO:0051082	identical protein binding, positive regulation of DNA binding, unfolded protein binding
OG0000980	Wa8730a001g009210	AT3G13190.1,AT5G55860.1,AT3G02930.2	Ms09t253360.1,Ms07t194530.1,Ms09t266090.1,Ms01t019160.1	CKAN_01214300,CKAN_01374900,CKAN_02432500	.	lm5633.a03.2.g09560_p1	.	Glyma.08G330800.2,Glyma.18G075600.1,Glyma.07G268550.1,Glyma.02G301400.2,Glyma.09G015000.1,Glyma.15G120700.1	.	Zosma04g17760,Zosma01g39520,Zosma01g03690	GO:0005829, GO:0009904, GO:0009903	cytosol, chloroplast accumulation movement, chloroplast avoidance movement
OG0000981	Wa8730a001g009220	AT5G55900.1,AT4G26620.1	Ms07t195480.1,Ms02t029620.1	.	COCNU_HT001RO01_01T006400,COCNU_HT001RO01_11T011370	lm5633.a03.2.g09760_p1	LOC_Os02g49320.1	Glyma.08G331100.1,Glyma.18G075500.1,Glyma.02G301500.1,Glyma.14G012700.1	Zm00001e015694_T001,Zm00001e023391_T001	Zosma04g17770	-	0
OG0000982	Wa8730a001g009230	AT5G48000.1,AT1G13090.2,AT1G50520.1,AT4G12330.1	Ms03t055880.1,Ms03t060770.1,Ms08t226300.1,Ms09t256710.1,Ms09t265680.1,Ms05t140850.1,Ms08t231350.1,Ms06t163140.1,Ms06t172950.1	CKAN_01363400,CKAN_01016500,CKAN_02426600,CKAN_00413900,CKAN_00630000	COCNU_HT001RO01_01T014380,COCNU_HT001RO01_11T010580	lm5633.a03.2.g08950_p1	LOC_Os06g41070.1,LOC_Os08g35510.1,LOC_Os02g09390.1	Glyma.19G144600.1,Glyma.02G176200.1,Glyma.12G239100.1,Glyma.10G092500.1,Glyma.03G142000.1	Zm00001e037597_T001,Zm00001e013026_T001,Zm00001e009670_T001,Zm00001e022198_T001,Zm00001e034270_T001	Zosma05g20250,Zosma01g20880,Zosma04g22270	GO:0080004, GO:0016709, GO:0080003	thalian-diol desaturase activity, oxidoreductase activity, acting on paired donors, with incorporation or reduction of molecular oxygen, NAD(P)H as one donor, and incorporation of one atom of oxygen, thalianol metabolic process
OG0000983	Wa8730a001g009240	.	.	CKAN_01378800	.	.	.	.	Zm00001e041096_T003,Zm00001e007778_T001	.	-	0
OG0000984	Wa8730a001g009250	.	Ms09t248010.1,Ms04t086500.1,Ms01t000220.1	CKAN_01213400,CKAN_01017300	COCNU_HT001RO01_01T006240,COCNU_HT001RO01_11T011440	lm5633.a03.2.g08890_p1,lm5633.a03.14.g05600_p1	LOC_Os02g57160.1,LOC_Os09g07660.2	Glyma.02G308600.1,Glyma.13G007200.1,Glyma.14G004500.1	Zm00001e013010_T002	Zosma03g03900,Zosma01g36550	GO:0010287, GO:1990641, GO:0055072	plastoglobule, response to iron ion starvation, iron ion homeostasis
OG0000985	Wa8730a001g009260	AT5G47680.1	Ms03t056030.1	CKAN_00259500,CKAN_02430500	COCNU_HT001RO01_11T005850	lm5633.a03.2.g08900_p1	LOC_Os02g49360.1	Glyma.09G014500.1,Glyma.15G120100.1	Zm00001e015698_T001	.	GO:0051704, -, GO:0050832	multi-organism process, 0, defense response to fungus
OG0000986	Wa8730a001g009270	.	.	CKAN_02422000	COCNU_HT001RO01_01T013600	.	LOC_Os06g17830.1	Glyma.09G014800.1,Glyma.15G120500.2	Zm00001e036852_T001	Zosma01g39490	GO:0043734, GO:0035513, GO:0006307	DNA-N1-methyladenine dioxygenase activity, oxidative RNA demethylation, DNA dealkylation involved in DNA repair
OG0000987	Wa8730a001g009280	AT1G55870.1	Ms03t056040.1	CKAN_00547100	COCNU_HT001RO01_01T013580	lm5633.a03.2.g08910_p1	LOC_Os08g34160.1,LOC_Os04g39260.3	Glyma.08G330300.1,Glyma.18G076100.1	Zm00001e041044_T006	.	GO:0009751, GO:0043169, GO:0046677	response to salicylic acid, cation binding, response to antibiotic
OG0000988	Wa8730a001g009290	AT5G55760.1	Ms08t230480.1	CKAN_01213300	COCNU_HT001RO01_01T013780	.	.	Glyma.08G330200.1,Glyma.18G076300.1	Zm00001e041089_T002	Zosma03g03910	GO:0051276, GO:0043970, -	chromosome organization, histone H3-K9 acetylation, 0
OG0000991	Wa8730a001g009300	AT5G55760.1	Ms08t230480.1	CKAN_01213300	COCNU_HT001RO01_01T013780	.	.	Glyma.08G330200.1,Glyma.18G076300.1	Zm00001e041089_T001	Zosma03g03910	GO:0051276, GO:0043970, -	chromosome organization, histone H3-K9 acetylation, 0
[truncated: 13,014 more rows]
