# Supplementary material for: Streamlined spatial and environmental expression signatures characterize the minimalist duckweedWolffia australiana
Source: HighWire-hosted journal article supplement (doi:10.1101/gr.279091.124), 2024-07-01
Supplement: Supplemental_Dataset_S11.xlsx [file Supplemental_Dataset_S11.xlsx]

## Sheet: Cell Cycle Genes
Dataset S11. Genes linked to the Cell Cycle and their Wolffia orthologues
Gene	Arabidopsis Orthologue	Arabidopsis Gene Name	Cell Cycle	Arabidopsis Gene Description
Wa8730a001g004240	AT4G02060	MCM7, PRL	G1/G0	Member of the minichromosome maintenance complex, involved in DNA replication initiation. Abundant in proliferating and endocycling tissues. Localized in the nucleus during G1, S and G2 phases of the cell cycle, and are released into the cytoplasmic compartment during mitosis. Binds chromatin.
Wa8730a004g007400	AT1G80080	AtRLP17	G1/G0	Encodes a transmembrane leucine-repeat containing receptor-like protein that is expressed in proliferative postprotodermal cells. Recessive mutation leads to disruption of asymmetric cell division during stomata development.
Wa8730a004g007870	AT1G80080	AtRLP17	G1/G0	Encodes a transmembrane leucine-repeat containing receptor-like protein that is expressed in proliferative postprotodermal cells. Recessive mutation leads to disruption of asymmetric cell division during stomata development.
Wa8730a005g003200	AT5G11550		G1/G0
Wa8730a009g000460	AT5G02260	ATEXP9	G1/G0	member of Alpha-Expansin Gene Family. ming convention from the Expansin Working Group (Kende et al, 2004. Plant Mol Bio)
Wa8730a009g001090	AT5G02260	ATEXP9	G1/G0	member of Alpha-Expansin Gene Family. ming convention from the Expansin Working Group (Kende et al, 2004. Plant Mol Bio)
Wa8730a009g001100	AT5G02260	ATEXP9	G1/G0	member of Alpha-Expansin Gene Family. ming convention from the Expansin Working Group (Kende et al, 2004. Plant Mol Bio)
Wa8730a009g001110	AT5G02260	ATEXP9	G1/G0	member of Alpha-Expansin Gene Family. ming convention from the Expansin Working Group (Kende et al, 2004. Plant Mol Bio)
Wa8730a009g001120	AT5G02260	ATEXP9	G1/G0	member of Alpha-Expansin Gene Family. ming convention from the Expansin Working Group (Kende et al, 2004. Plant Mol Bio)
Wa8730a009g001130	AT5G02260	ATEXP9	G1/G0	member of Alpha-Expansin Gene Family. ming convention from the Expansin Working Group (Kende et al, 2004. Plant Mol Bio)
Wa8730a009g001140	AT5G02260	ATEXP9	G1/G0	member of Alpha-Expansin Gene Family. ming convention from the Expansin Working Group (Kende et al, 2004. Plant Mol Bio)
Wa8730a009g001150	AT5G02260	ATEXP9	G1/G0	member of Alpha-Expansin Gene Family. ming convention from the Expansin Working Group (Kende et al, 2004. Plant Mol Bio)
Wa8730a009g001160	AT5G02260	ATEXP9	G1/G0	member of Alpha-Expansin Gene Family. ming convention from the Expansin Working Group (Kende et al, 2004. Plant Mol Bio)
Wa8730a009g001170	AT5G02260	ATEXP9	G1/G0	member of Alpha-Expansin Gene Family. ming convention from the Expansin Working Group (Kende et al, 2004. Plant Mol Bio)
Wa8730a009g001180	AT5G02260	ATEXP9	G1/G0	member of Alpha-Expansin Gene Family. ming convention from the Expansin Working Group (Kende et al, 2004. Plant Mol Bio)
Wa8730a009g001270	AT5G02260	ATEXP9	G1/G0	member of Alpha-Expansin Gene Family. ming convention from the Expansin Working Group (Kende et al, 2004. Plant Mol Bio)
Wa8730a009g001300	AT5G02260	ATEXP9	G1/G0	member of Alpha-Expansin Gene Family. ming convention from the Expansin Working Group (Kende et al, 2004. Plant Mol Bio)
Wa8730a009g001310	AT5G02260	ATEXP9	G1/G0	member of Alpha-Expansin Gene Family. ming convention from the Expansin Working Group (Kende et al, 2004. Plant Mol Bio)
Wa8730a009g001320	AT5G02260	ATEXP9	G1/G0	member of Alpha-Expansin Gene Family. ming convention from the Expansin Working Group (Kende et al, 2004. Plant Mol Bio)
Wa8730a009g001330	AT5G02260	ATEXP9	G1/G0	member of Alpha-Expansin Gene Family. ming convention from the Expansin Working Group (Kende et al, 2004. Plant Mol Bio)
Wa8730a009g001340	AT5G02260	ATEXP9	G1/G0	member of Alpha-Expansin Gene Family. ming convention from the Expansin Working Group (Kende et al, 2004. Plant Mol Bio)
Wa8730a009g001390	AT5G02260	ATEXP9	G1/G0	member of Alpha-Expansin Gene Family. ming convention from the Expansin Working Group (Kende et al, 2004. Plant Mol Bio)
Wa8730a009g001590	AT5G02260	ATEXP9	G1/G0	member of Alpha-Expansin Gene Family. ming convention from the Expansin Working Group (Kende et al, 2004. Plant Mol Bio)
Wa8730a009g002800	AT4G16141	AtGATA17L	G1/G0
Wa8730a015g001090	AT2G18876		G1/G0
Wa8730a019g000140	AT1G07370	ATPC1	G1/G0	Encodes putative proliferating cell nuclear antigen involved in cell cycle regulation.
Wa8730a019g000140	AT2G29570	ATPC2	G1/G0	Functiolly interacts with POLH to repair D damaged by UVB damage.
Wa8730a001g003190	AT5G18700	EMB3013	G2	Encodes a microtubule-associated kise-like protein RUNKEL (RUK). Contains a putative serine/threonine kise domain and a microtubule-binding domain. RUK directly binds to microtubules in vitro and colocalizes with mitotic preprophase band, spindle, and phragmoplast in vivo. Required for cell plate expansion in cytokinesis.
Wa8730a001g003230	AT4G03100		G2
Wa8730a001g003920	AT1G02690	IMPA-6	G2	Putative importin alpha isoform. When overexpressed can rescue the impa-4 decreased transformation susceptibility phenotype.
Wa8730a001g003920	AT4G02150	ATIMPALPHA3	G2	Encodes IMPORTIN ALPHA 3. Mutant plants act as suppressors of snc1 response and salicylic acid accumulation. Located in the nucleus. Involved in protein import. Protein interacts with Agrobacterium proteins VirD2 and VirE2. Is not individually essential for Agrobacterium-mediated root transformation, but when overexpressed can rescue the impa-4 decreased transformation susceptibility phenotype.
Wa8730a001g005560	AT4G13370	CORD3	G2
Wa8730a001g007200	AT5G60150		G2
Wa8730a001g007250	AT2G07170		G2
Wa8730a001g007790	AT5G11510	AtMYB3R4	G2	Arabidopsis thalia putative c-myb-like transcription factor MYB3R-4. Functions in powdery mildew induced host endoreduplication at the site of infection.
Wa8730a001g008700	AT3G57860	GIG1	G2	Encodes a protein that controls entry into the second meiotic division.
Wa8730a001g010350	AT5G60150		G2
Wa8730a001g010560	AT2G28620	RSW7	G2
Wa8730a002g003850	AT3G60840	MAP65-4	G2
Wa8730a002g003850	AT5G51600	ATMAP65-3	G2	Mutant has defective roots. Essential for giant cell ontogenesis. Role in organizing the mitotic microtubule array during both early and late mitosis in all plant organs.
Wa8730a002g006370	AT3G17680		G2
Wa8730a002g006750	AT1G50240	FU	G2	The FUSED (FU) gene belongs to Ser/Thr protein kise family and has a key role in the hedgehog sigling pathway known to control cell proliferation and patterning in fruit flies and humans . Arabidopsis thalia genome has a single Fu gene. Cytokinesis-defective mutants, which we med two-in-one (tio), result from mutations in Arabidopsis Fu. Phenotypic alysis of tio mutants reveals an essential role …
Wa8730a003g001380	AT2G22610		G2
Wa8730a003g001620	AT5G42720		G2
Wa8730a003g003980	AT3G20150		G2
Wa8730a003g003980	AT4G26660		G2
Wa8730a003g003980	AT5G55520		G2
Wa8730a003g005910	AT1G10780		G2
Wa8730a004g002020	AT5G56580	ANQ1	G2	Encodes a member of the MAP Kise Kise family of proteins. It can phosphorylate MPK12 in vitro and it can be dephosphorylated by MKP2 in vitro.
Wa8730a004g003730	AT3G23890	ATTOPII	G2	Encodes a topoisomerase II that is highly expressed in young seedlings. The protein is localized in the nucleus and gene expression levels are increased in proliferative tissues.
Wa8730a004g004310	AT2G20635		G2
Wa8730a004g007070	AT1G53140	DRP5A	G2	Encodes DRP5A, a dymin protein involved in cytokinesis in Arabidopsis.
Wa8730a004g008560	AT3G15550		G2
Wa8730a005g000870	AT1G15660	CENP-C	G2	Encodes a homologue of the human centromeric protein C (CENP-C). CENP-C co-localizes with the 180 bp centromeric regions of chromosomes throughout the cell cycle, but does not completely cover the 180 bp regions.
Wa8730a005g002180	AT1G72670	iqd8	G2
Wa8730a005g002510	AT5G56580	ANQ1	G2	Encodes a member of the MAP Kise Kise family of proteins. It can phosphorylate MPK12 in vitro and it can be dephosphorylated by MKP2 in vitro.
Wa8730a005g002600	AT1G72670	iqd8	G2
Wa8730a005g006230	AT1G78430	RIP2	G2
Wa8730a006g000270	AT4G05190	ATK5	G2	ATK5 encodes a kinesin protein involved in microtubule spindle morphogenesis. It acts as a minus-end directed motor as well as a plus-end tracking protein (+TIP). Localizes to mitotic spindle midzones and regions rich in growing plus-ends within phragmoplasts.
Wa8730a006g000270	AT4G21270	ATK1	G2	Encodes a kinesin-like motor protein heavy chain. Loss of function mutations have reduced fertility and are defective in spindle formation in male meiosis.
Wa8730a006g000280	AT4G21270	ATK1	G2	Encodes a kinesin-like motor protein heavy chain. Loss of function mutations have reduced fertility and are defective in spindle formation in male meiosis.
Wa8730a006g002910	AT3G23670	KINESIN-12B	G2	Microtubule motor kinesin PAKRP1L/Kinesin-12B. Together with PAKRP1/Kinesin-12A, serve as linkers of the plus ends of antiparallel microtubules in the phragmoplast.
Wa8730a006g005730	AT1G35780		G2
Wa8730a007g001440	AT1G21810	VETH2	G2
Wa8730a007g002190	AT5G48460	AtFIM2	G2
Wa8730a007g006820	AT5G63950	CHR24	G2
Wa8730a007g008330	AT4G03100		G2
Wa8730a007g008520	AT2G36200		G2
Wa8730a008g002160	AT1G16630		G2
Wa8730a008g004460	AT4G05190	ATK5	G2	ATK5 encodes a kinesin protein involved in microtubule spindle morphogenesis. It acts as a minus-end directed motor as well as a plus-end tracking protein (+TIP). Localizes to mitotic spindle midzones and regions rich in growing plus-ends within phragmoplasts.
Wa8730a008g004460	AT4G21270	ATK1	G2	Encodes a kinesin-like motor protein heavy chain. Loss of function mutations have reduced fertility and are defective in spindle formation in male meiosis.
Wa8730a009g000070	AT2G38160		G2
Wa8730a009g000980	AT5G62550		G2
Wa8730a009g002440	AT4G15830		G2
Wa8730a009g002770	AT2G47500		G2
Wa8730a009g002810	AT1G02690	IMPA-6	G2	Putative importin alpha isoform. When overexpressed can rescue the impa-4 decreased transformation susceptibility phenotype.
Wa8730a009g002810	AT4G02150	ATIMPALPHA3	G2	Encodes IMPORTIN ALPHA 3. Mutant plants act as suppressors of snc1 response and salicylic acid accumulation. Located in the nucleus. Involved in protein import. Protein interacts with Agrobacterium proteins VirD2 and VirE2. Is not individually essential for Agrobacterium-mediated root transformation, but when overexpressed can rescue the impa-4 decreased transformation susceptibility phenotype.
Wa8730a009g004190	AT4G01730		G2
Wa8730a009g007200	AT1G59540	ZCF125	G2	Encodes a kinesin-like protein.
Wa8730a009g007200	AT2G22610		G2
Wa8730a010g000580	AT5G62550		G2
Wa8730a010g001750	AT4G11080	3xHMG-box1	G2
Wa8730a011g004970	AT5G48460	AtFIM2	G2
Wa8730a012g000830	AT1G34355	ATPS1	G2	Encodes PS1 (Parallel Spindle 1). Mutations in PS1 lead to diploid male spores, diploid pollen grains, and spontaneous triploid plants in the next generation. Female meiosis is not affected in the mutants.
Wa8730a012g004770	AT1G35780		G2
Wa8730a012g004870	AT1G23000		G2
Wa8730a013g004950	AT5G63950	CHR24	G2
Wa8730a013g005550	AT4G14310		G2
Wa8730a014g000170	AT5G60930		G2
Wa8730a014g000540	AT2G28620	RSW7	G2
Wa8730a014g000540	AT5G60930		G2
Wa8730a014g003130	AT1G09815	POLD4	G2
Wa8730a014g004740	AT2G45490	AtAUR3	G2	Encodes a member of a family of Ser/Thr kises whose activities peak during cell division. Transcripts are abundant in tissues rich in dividing cells like roots and flowers but are low or absent in fully expanded leaves and stems. In interphase cells, the protein is predomintly nuclear. During mitosis, the protein associates with plant-specific cytoskeletal structures (preprophase band, phragmopla…
Wa8730a014g005690	AT3G10310		G2
Wa8730a014g006220	AT2G45490	AtAUR3	G2	Encodes a member of a family of Ser/Thr kises whose activities peak during cell division. Transcripts are abundant in tissues rich in dividing cells like roots and flowers but are low or absent in fully expanded leaves and stems. In interphase cells, the protein is predomintly nuclear. During mitosis, the protein associates with plant-specific cytoskeletal structures (preprophase band, phragmopla…
Wa8730a015g001210	AT3G10310		G2
Wa8730a015g001830	AT2G22610		G2
Wa8730a015g002170	AT2G33560	BUBR1	G2	Encodes BUBR1. May have the spindle assembly checkpoint protein functions conserved from yeast to humans.
Wa8730a015g003010	AT5G48460	AtFIM2	G2
Wa8730a015g005330	AT5G42720		G2
Wa8730a016g000820	AT3G19590	BUB3.1	G2	Encodes a protein that may have a role in the spindle assembly checkpoint.
Wa8730a018g000380	AT2G28620	RSW7	G2
Wa8730a018g000700	AT2G28620	RSW7	G2
Wa8730a019g000880	AT5G18700	EMB3013	G2	Encodes a microtubule-associated kise-like protein RUNKEL (RUK). Contains a putative serine/threonine kise domain and a microtubule-binding domain. RUK directly binds to microtubules in vitro and colocalizes with mitotic preprophase band, spindle, and phragmoplast in vivo. Required for cell plate expansion in cytokinesis.
Wa8730a019g002570	AT2G47920	NET3C	G2
Wa8730a019g002570	AT3G17680		G2
Wa8730a019g002680	AT1G72250		G2
Wa8730a019g002680	AT5G27550		G2
Wa8730a019g002750	AT3G57060		G2
Wa8730a020g002890	AT3G01710		G2
Wa8730a001g004590	AT5G05080	ATUBC22	M
Wa8730a001g005700	AT3G51740	IMK2	M	encodes a leucine-repeat receptor kise expressed in inflorescence meristem. Locus association was made from performing sequence alysis with IMK3 (MRLK) whose locus association was provided by the authors.
Wa8730a001g005860	AT3G51740	IMK2	M	encodes a leucine-repeat receptor kise expressed in inflorescence meristem. Locus association was made from performing sequence alysis with IMK3 (MRLK) whose locus association was provided by the authors.
Wa8730a001g005920	AT3G51740	IMK2	M	encodes a leucine-repeat receptor kise expressed in inflorescence meristem. Locus association was made from performing sequence alysis with IMK3 (MRLK) whose locus association was provided by the authors.
Wa8730a001g008220	AT5G56120		M
Wa8730a001g009610	AT2G34190		M
Wa8730a001g009920	AT2G34190		M
Wa8730a001g010210	AT3G53380	LecRK-VIII.1	M
Wa8730a002g000370	AT5G55180		M
Wa8730a002g000400	AT5G55180		M
Wa8730a002g002130	AT1G63100		M
Wa8730a002g002550	AT3G60900	FLA10	M
Wa8730a002g003600	AT4G35730	ISTL3	M
Wa8730a002g004680	AT1G20030		M
Wa8730a002g008540	AT2G37390	KR2	M
Wa8730a002g009850	AT2G33400		M
Wa8730a002g009850	AT5G44040		M
Wa8730a002g010450	AT1G31335		M
Wa8730a003g002840	AT5G15510		M
Wa8730a003g003720	AT5G47500	PME5	M
Wa8730a003g004960	AT3G51740	IMK2	M	encodes a leucine-repeat receptor kise expressed in inflorescence meristem. Locus association was made from performing sequence alysis with IMK3 (MRLK) whose locus association was provided by the authors.
Wa8730a003g007020	AT3G22880	ARLIM15	M	Expression of the AtDMC1 is restricted to pollen mother cells in anthers and to megaspore mother cells in ovules. Similar to meiosis-specific yeast DMC gene.
Wa8730a003g007040	AT3G22880	ARLIM15	M	Expression of the AtDMC1 is restricted to pollen mother cells in anthers and to megaspore mother cells in ovules. Similar to meiosis-specific yeast DMC gene.
Wa8730a004g002020	AT2G25880	AtAUR2	M	Encodes a member of a family of Ser/Thr kises whose activities peak during cell division. Transcripts are abundant in tissues rich in dividing cells like roots and flowers but are low or absent in fully expanded leaves and stems. In interphase cells, the protein is predomintly nuclear. During mitosis, the protein associates with plant-specific cytoskeletal structures (preprophase band, phragmopla…
Wa8730a004g002020	AT4G32830	AtAUR1	M	Encodes a member of a family of Ser/Thr kises whose activities peak during cell division. Transcripts are abundant in tissues rich in dividing cells like roots and flowers but are low or absent in fully expanded leaves and stems. In interphase cells, the protein is predomintly nuclear. During mitosis, the protein associates with plant-specific cytoskeletal structures (preprophase band, phragmopla…
Wa8730a004g007270	AT2G34190		M
Wa8730a005g002410	AT2G19620	NDL3	M
Wa8730a005g005950	AT2G34190		M
Wa8730a006g000500	AT1G03780	AtTPX2	M	Homolog of vertebrate TPX2. Protein has three domains involved in nuclear targeting, one in nuclear export and two in microtubule binding. Involved in mitotic spindle assembly during late prophase and early prometaphase.
Wa8730a006g001490	AT5G44560	VPS2.2	M
Wa8730a007g002480	AT3G07320		M
Wa8730a007g005640	AT3G02640		M
Wa8730a007g005640	AT5G16250		M
Wa8730a007g007510	AT3G18800		M
Wa8730a008g001760	AT1G49870		M
Wa8730a008g002160	AT2G16270		M
Wa8730a008g003480	AT1G30690	PATL4	M
Wa8730a008g003530	AT3G12870		M
Wa8730a009g002780	AT1G02730	ATCSLD5	M	Encodes a gene similar to cellulose synthase. Knock-out mutant has reduced growth, reduced xylan level and reduced xylan synthase activity in stems.
Wa8730a009g003550	AT3G05330	ATN	M	Encodes a protein with moderate sequence similarity to the maize microtubule-binding protein TANGLED1. A single base-pair deletion (-A) at position Chr3:1519176 in Columbia relative to the Landsberg erecta and Achkarren-2 ecotype (see ESTs DR378436 and CB26450) introduces a frame-shift and premature termition codon. The protein encoded from the Columbia gene is truncated by 29 amino acids relativ…
Wa8730a009g003760	AT1G50490	UBC20	M	Encodes one of two ubiquitin-conjugating enzymes belonging to the E2-C gene family (the other being UBC19). Transcript is always found in diving cells, but also in other non-dividing cells.
Wa8730a010g001680	AT2G25880	AtAUR2	M	Encodes a member of a family of Ser/Thr kises whose activities peak during cell division. Transcripts are abundant in tissues rich in dividing cells like roots and flowers but are low or absent in fully expanded leaves and stems. In interphase cells, the protein is predomintly nuclear. During mitosis, the protein associates with plant-specific cytoskeletal structures (preprophase band, phragmopla…
Wa8730a010g001750	AT4G23800	3xHMG-box2	M
Wa8730a010g005040	AT3G07320		M
Wa8730a010g005040	AT5G55180		M
Wa8730a011g003900	AT5G55180		M
Wa8730a011g004810	AT5G48310	RASD1	M
Wa8730a012g001080	AT3G53380	LecRK-VIII.1	M
Wa8730a013g002170	AT3G60900	FLA10	M
Wa8730a013g003340	AT5G66230		M
Wa8730a013g005560	AT4G14330		M
Wa8730a014g004850	AT3G51740	IMK2	M	encodes a leucine-repeat receptor kise expressed in inflorescence meristem. Locus association was made from performing sequence alysis with IMK3 (MRLK) whose locus association was provided by the authors.
Wa8730a014g005710	AT1G20030		M
Wa8730a016g003170	AT1G66250		M
Wa8730a018g000200	AT3G55660	ATROPGEF6	M	Encodes a member of KPP-like gene family, homolog of KPP (kise partner protein) gene in tomato. Also a member of the RopGEF (guanine nucleotide exchange factor) family, containing the novel PRONE domain (plant-specific Rop nucleotide exchanger), which is exclusively active towards members of the Rop subfamily.
Wa8730a018g000540	AT5G02490	AtHsp70-2	M
Wa8730a018g001880	AT5G05080	ATUBC22	M
Wa8730a019g001500	AT3G56100	IMK3	M	Protein kise expressed in meristematic cells. Phosphorylates AGL24.
Wa8730a019g002570	AT1G03470	NET3A	M
Wa8730a001g003330	AT1G51060	HTA10	S	Encodes HTA10, a histone H2A protein.
Wa8730a001g003330	AT3G20670	HTA13	S	Encodes HTA13, a histone H2A protein.
Wa8730a001g003330	AT4G27230	HTA2	S	Encodes HTA2, a histone H2A protein.
Wa8730a001g003330	AT5G27670	HTA7	S	Encodes HTA7, a histone H2A protein.
Wa8730a001g003330	AT5G54640	ATHTA1, HTA1, RAT5	S	Isolated from T-DNA insertion line, the rat5 mutant is deficient in T-DNA integration. Encodes histone2A protein.
Wa8730a001g007750	AT5G59690		S
Wa8730a001g011150	AT1G07790	HTB1	S	Encodes a histone 2B (H2B) protein.
Wa8730a001g011150	AT2G28720		S
Wa8730a001g011150	AT2G37470		S
Wa8730a001g011150	AT3G45980	H2B, HTB9	S	Encodes a histone 2B (H2B) protein. This protein can be ubiquitinated in planta, and this modification depends on the HUB1 and HUB2 E3 ubiquitin ligases as well as the UBC1 and UBC2 E2 ubiquitin conjugating enzymes. Lysine 146 appears to be the site of the ubiquitin addition.
Wa8730a001g011150	AT3G53650		S
Wa8730a001g011150	AT5G59910	HTB4	S	Histone superfamily protein
Wa8730a002g005930	AT2G28740	HIS4	S	histone 4
Wa8730a002g007030	AT5G23420	HMGB6	S	Encodes HMGB6, a protein belonging to the subgroup of HMGB (high mobility group B) proteins. Localized in the nucleus. Binds to supercoiled D in vitro. HMGB6 is phosphorylated by protein kise CK2alpha within its acidic C-termil domain.
Wa8730a002g010050	AT1G04020	ATBARD1	S	Encodes a protein containing two tandem BRCA1 C-Termil (BRCT) domains, which function in phosphorylation-dependent proteinprotein interactions.Loss of function mutations cause defects in meristem organization due to failure to repress WUS. BARD1 binds to WUS promoter and over expression of BARD reduces the extent of WUS expression.
Wa8730a003g003130	AT5G61000	ATRPA70D	S
Wa8730a003g003900	AT3G07800	AtTK1a	S
Wa8730a003g005610	AT3G54560	HTA11	S	Encodes HTA11, a histone H2A protein.
Wa8730a003g007190	AT1G69770	CMT3	S	Encodes a chromomethylase involved in methylating cytosine residues at non-CG sites. Involved in preferentially methylating transposon-related sequences, reducing their mobility. CMT3 interacts with an Arabidopsis homologue of HP1 (heterochromatin protein 1), which in turn interacts with methylated histones. Involved in gene silencing.
Wa8730a004g006140	AT2G21790	ATRNR1	S	encodes large subunit of ribonucleotide reductase involved in the production of deoxyribonucleoside triphosphates (dNTPs) for D replication and repair
Wa8730a006g000300	AT3G20670	HTA13	S	Encodes HTA13, a histone H2A protein.
Wa8730a006g000300	AT4G27230	HTA2	S	Encodes HTA2, a histone H2A protein.
Wa8730a006g000300	AT5G54640	ATHTA1, HTA1, RAT5	S	Isolated from T-DNA insertion line, the rat5 mutant is deficient in T-DNA integration. Encodes histone2A protein.
Wa8730a007g000770	AT3G27360	H3.1	S	Histone superfamily protein
Wa8730a007g002740	AT5G63550		S
Wa8730a007g003760	AT1G57820	ORTH2	S	Encodes a 645-amino acid methylcytosine-binding protein with a PHD domain, two RING finger domains, and an SRA domain that is involved in centromere heterochromatinization. This protein functions as an E3 ubiquitin ligase in vitro. The protein has been shown to bind to methylated cytosines of CG, CNG and CNN motifs via its SRA domain but has a preference for the former. It plays a role in the est…
Wa8730a008g000320	AT3G54560	HTA11	S	Encodes HTA11, a histone H2A protein.
Wa8730a008g004540	AT1G51060	HTA10	S	Encodes HTA10, a histone H2A protein.
Wa8730a008g004540	AT3G20670	HTA13	S	Encodes HTA13, a histone H2A protein.
Wa8730a008g004540	AT4G27230	HTA2	S	Encodes HTA2, a histone H2A protein.
Wa8730a008g004540	AT5G54640	ATHTA1, HTA1, RAT5	S	Isolated from T-DNA insertion line, the rat5 mutant is deficient in T-DNA integration. Encodes histone2A protein.
Wa8730a009g000650	AT2G28740	HIS4	S	histone 4
Wa8730a009g000650	AT3G45930		S
Wa8730a009g000650	AT3G53730		S
Wa8730a009g000650	AT5G59690		S
Wa8730a009g000710	AT1G07790	HTB1	S	Encodes a histone 2B (H2B) protein.
Wa8730a009g000710	AT2G28720		S
Wa8730a009g000710	AT2G37470		S
Wa8730a009g000710	AT3G45980	H2B, HTB9	S	Encodes a histone 2B (H2B) protein. This protein can be ubiquitinated in planta, and this modification depends on the HUB1 and HUB2 E3 ubiquitin ligases as well as the UBC1 and UBC2 E2 ubiquitin conjugating enzymes. Lysine 146 appears to be the site of the ubiquitin addition.
Wa8730a009g000710	AT3G53650		S
Wa8730a009g000710	AT5G59910	HTB4	S	Histone superfamily protein
Wa8730a009g000740	AT1G07790	HTB1	S	Encodes a histone 2B (H2B) protein.
Wa8730a009g000740	AT2G28720		S
Wa8730a009g000740	AT2G37470		S
Wa8730a009g000740	AT3G45980	H2B, HTB9	S	Encodes a histone 2B (H2B) protein. This protein can be ubiquitinated in planta, and this modification depends on the HUB1 and HUB2 E3 ubiquitin ligases as well as the UBC1 and UBC2 E2 ubiquitin conjugating enzymes. Lysine 146 appears to be the site of the ubiquitin addition.
Wa8730a009g000740	AT3G53650		S
Wa8730a009g000740	AT5G59910	HTB4	S	Histone superfamily protein
Wa8730a010g000630	AT3G52630	RPA3A	S
Wa8730a010g003360	AT5G38690		S
Wa8730a010g006310	AT2G28740	HIS4	S	histone 4
Wa8730a014g001930	AT1G06760	H1.1	S
Wa8730a015g001500	AT2G28740	HIS4	S	histone 4
Wa8730a015g001520	AT2G28740	HIS4	S	histone 4
Wa8730a015g001620	AT2G28740	HIS4	S	histone 4
Wa8730a016g003070	AT1G14900	HMGA	S	Encodes a protein belonging to the subgroup of HMGA (high mobility group A) proteins that interact with A/T-rich stretches of D.
Wa8730a016g003070	AT3G18035	HON4	S	A linker histone like protein
Wa8730a018g000730	AT1G07790	HTB1	S	Encodes a histone 2B (H2B) protein.
Wa8730a018g000730	AT2G28720		S
Wa8730a018g000730	AT2G37470		S
Wa8730a018g000730	AT3G46030	HTB11	S	Histone superfamily protein
Wa8730a018g000730	AT3G53650		S
Wa8730a018g000730	AT5G59910	HTB4	S	Histone superfamily protein
Wa8730a019g000630	AT5G59870	HTA6	S	Encodes HTA6, a histone H2A protein.
Wa8730a019g002730	AT4G27230	HTA2	S	Encodes HTA2, a histone H2A protein.
Wa8730a019g002730	AT5G27670	HTA7	S	Encodes HTA7, a histone H2A protein.
Wa8730a020g001330	AT3G27060	ATTSO2, TSO2	S	Encodes one of the 3 ribonucleotide reductase (RNR) small subunit genes. TSO2 transcription occurs predominantly at the S-phase of the cell cycle and its expression pattern is consistent with its role in dNDP biosynthesis during DNA replication in actively dividing cells. Critical for cell cycle progression, DNA damage repair and plant development.
Wa8730a001g000750	AT3G17360	POK1		PHRAGMOPLAST ORIENTING KINESIN 1 is one of the two Arabidopsis homologs isolated in yeast two-hybrid screen for interaction partners of maize gene TANGLED1 (TAN1). Based on sequence homology in their motor domains, POK1 and POK2 belong to the kinesin-12 class which also includes the well-characterized group of phragmoplast-associated kinesins AtPAKRPs. Both kinesins are composed of an N-termil mo…
Wa8730a001g002480	AT1G66750	AT
Wa8730a001g003330	AT1G08880	G-H2AX, GAMMA-H2AX, H2AXA, HTA5		Encodes HTA5, a histone H2A protein. H2AX is a meiosis-specific isoform of histone H2A. Upon DSB formation, rapid accumulation of phosphorylated H2AX (&#947
Wa8730a001g003330	AT1G54690	G-H2AX, GAMMA-H2AX, H2AXB, HTA3		Encodes HTA3, a histone H2A protein. H2AX is a meiosis-specific isoform of histone H2A. Upon DSB formation, rapid accumulation of phosphorylated H2AX (&#947
Wa8730a001g004380	AT2G26760	CYCB1
Wa8730a001g005820	AT2G40760			Rhodanese/Cell cycle control phosphatase superfamily protein
Wa8730a001g008980	AT2G42220			Rhodanese/Cell cycle control phosphatase superfamily protein
Wa8730a001g009930	AT3G01330	DEL3, E2FF, E2L2		Member of the E2F transcription factors, (cell cycle genes), key components of the cyclin D/retinoblastoma/E2F pathway.
Wa8730a001g009930	AT5G14960	DEL2, E2FD, E2L1		DP-E2F-like 2
Wa8730a002g004600	AT2G21045			Rhodanese/Cell cycle control phosphatase superfamily protein
Wa8730a002g005120	AT2G18050	HIS1-3		encodes a structurally divergent linker histone whose gene expression is induced by dehydration and ABA.
Wa8730a002g005510	AT1G20610	CYCB2
Wa8730a002g005510	AT1G76310	CYCB2
Wa8730a002g005510	AT2G17620	CYCB2
Wa8730a002g005510	AT4G35620	CYCB2
Wa8730a002g010050	AT4G21070	ATBRCA1, BRCA1		Encodes AtBRCA1, an ortholog of the human breast cancer susceptibility gene 1. Contains one N-terminal RING finger, two C-terminal BRCT and the p300/CBP interacting domain. Strongly induced by gamma rays, consistent with a putative role in DNA repair and in cell cycle control.
Wa8730a003g000440	AT1G47870	ATE2F2, ATE2FC, E2FC		Member of the E2F transcription factors, (cell cycle genes), key components of the cyclin D/retinoblastoma/E2F pathway. AtE2Fc is regulated by a balance between gene expression and ubiquitin-proteasome proteolysis. AtE2Fc might play a role in cell division and during the transition from skotomorphogenesis to photomorphogenesis. E2Fc has been shown to interact with DPB in its nonphosphorylated form
Wa8730a003g001890	AT4G34160	CYCD3, CYCD3
Wa8730a003g001890	AT4G37630	CYCD5
Wa8730a003g001890	AT5G65420	CYCD4
Wa8730a003g002130	AT3G50070	CYCD3
Wa8730a003g002130	AT4G34160	CYCD3, CYCD3
Wa8730a003g002130	AT4G37630	CYCD5
Wa8730a003g002130	AT5G65420	CYCD4
Wa8730a003g002130	AT5G67260	CYCD3
Wa8730a003g002460	AT1G47230	CYCA3
Wa8730a003g002460	AT4G37490	CYC1, CYCB1, CYCB1
Wa8730a003g002460	AT5G43080	CYCA3
Wa8730a003g002740	AT5G63610	ATCDK8, CDKE1, CDKE
Wa8730a003g006110	AT4G40040	H3.3		Histone superfamily protein
Wa8730a003g008220	AT3G22425	HISN5A, IGPD		Encodes imidazoleglycerolphosphate dehydratase.
Wa8730a003g008220	AT4G14910	HISN5B		Encodes a protein that is predicted to act as a imidazoleglycerol-phosphate dehydratase involved in histidine biosynthesis
Wa8730a005g000710	AT1G15570	CYCA2
Wa8730a005g000710	AT1G44110	CYCA1
Wa8730a005g000710	AT1G80370	CYCA2
Wa8730a005g000710	AT5G11300	CYC2BAT, CYC3B, CYCA2
Wa8730a005g000710	AT5G25380	CYCA2
Wa8730a005g002230	AT4G29730	MSI5, NFC5		cell cycle-related repressor genes encoding WD-repeat proteins.
Wa8730a005g003140	AT4G28980	CAK1AT, CDKF
Wa8730a006g000300	AT1G08880	G-H2AX, GAMMA-H2AX, H2AXA, HTA5		Encodes HTA5, a histone H2A protein. H2AX is a meiosis-specific isoform of histone H2A. Upon DSB formation, rapid accumulation of phosphorylated H2AX (&#947
Wa8730a006g000300	AT1G54690	G-H2AX, GAMMA-H2AX, H2AXB, HTA3		Encodes HTA3, a histone H2A protein. H2AX is a meiosis-specific isoform of histone H2A. Upon DSB formation, rapid accumulation of phosphorylated H2AX (&#947
Wa8730a006g001950	AT4G21070	ATBRCA1, BRCA1		Encodes AtBRCA1, an ortholog of the human breast cancer susceptibility gene 1. Contains one N-terminal RING finger, two C-terminal BRCT and the p300/CBP interacting domain. Strongly induced by gamma rays, consistent with a putative role in DNA repair and in cell cycle control.
Wa8730a006g002410	AT4G24750			Rhodanese/Cell cycle control phosphatase superfamily protein
Wa8730a006g004700	AT1G26840	ATORC6, ORC6		Origin Recognition Complex subunit 6. Involved in the initiation of DNA replication. Regulated transcriptionally during cell cycle, peaking at G1/S-phase. Target of E2F/DF family of transcription factors.
Wa8730a006g004720	AT1G18800	NRP2		Double nrp1-1 nrp2-1 mutants show arrest of cell cycle progression at G2/M and disordered cellular organization occurred in root tips. Localize in the nucleus and can form homomeric and heteromeric protein complexes with NRP1. Bind histones Histone2A and Histone2B and associate with chromatin in vivo.
Wa8730a006g004720	AT1G74560	NRP1		Double nrp1-1 nrp2-1 mutants show arrest of cell cycle progression at G2/M and disordered cellular organization occurred in root tips. Localize in the nucleus and can form homomeric and heteromeric protein complexes with NRP2. Bind histones Histone2A and Histone2B and associate with chromatin in vivo.
Wa8730a006g005820	AT1G70210	ATCYCD1
Wa8730a006g005820	AT2G22490	ATCYCD2
Wa8730a006g005820	AT5G10440	CYCD4
Wa8730a006g005820	AT5G65420	CYCD4
Wa8730a007g000710	AT3G48750	CDC2, CDC2A, CDC2AAT, CDK2, CDKA1, CDKA
Wa8730a007g001210	AT1G77320	MEI1		Mutant is defective in meiosis and produces abnormal microspores. Encodes a BRCT-domain-containing protein that could be specific to the meiotic cell cycle and that plays a crucial role in some DNA repair events independent of SPO11 DSB recombination repair.
Wa8730a007g002560	AT3G48750	CDC2, CDC2A, CDC2AAT, CDK2, CDKA1, CDKA
Wa8730a007g002560	AT5G63610	ATCDK8, CDKE1, CDKE
Wa8730a007g005650	AT3G59780			Rhodanese/Cell cycle control phosphatase superfamily protein
Wa8730a008g001950	AT3G50070	CYCD3
Wa8730a008g001950	AT5G67260	CYCD3
Wa8730a008g005690	AT4G03270	CYCD6
Wa8730a009g000960	AT3G08920			Rhodanese/Cell cycle control phosphatase superfamily protein
Wa8730a009g003340	AT2G38620	CDKB1
Wa8730a009g003340	AT3G54180	CDC2B, CDKB1
Wa8730a010g003190	AT2G01120	ATORC4, ORC4		Origin Recognition Complex subunit 4. Involved in the initiation of DNA replication. Regulated transcriptionally during cell cycle, peaking at G1/S-phase. Target of E2F/DF family of transcription factors. Interacts with all ORC subunits except ORC1b.
Wa8730a011g000290	AT5G16690	ATORC3, ORC3		Origin Recognition Complex subunit 3. Involved in the initiation of DNA replication. Regulated transcriptionally during cell cycle, peaking at G1/S-phase. Target of E2F/DF family of transcription factors. Interacts with all ORC subunits except ORC1b.
Wa8730a012g002090	AT3G48750	CDC2, CDC2A, CDC2AAT, CDK2, CDKA1, CDKA
Wa8730a012g004560	AT1G18040	AT
Wa8730a012g004560	AT1G73690	AT
Wa8730a012g004560	AT5G10270	CDKC
Wa8730a012g004560	AT5G64960	CDKC2, CDKC
Wa8730a013g003940	AT1G17850			Rhodanese/Cell cycle control phosphatase superfamily protein
Wa8730a013g005480	AT2G32710	ACK2, ICK7, KRP4		Kip-related protein (KRP) gene, encodes CDK (cyclin-dependent kinase) inhibitor (CKI). A member of seven KRP genes found in Arabidopsis thaliana. Negative regulator of cell division. Expressed in actively dividing cells.
Wa8730a014g000390	AT3G19050	POK2		PHRAGMOPLAST ORIENTING KINESIN 2 is one of the two Arabidopsis homologs isolated in yeast two-hybrid screen for interaction partners of maize gene TANGLED1 (TAN1). Based on sequence homology in their motor domains, POK1 and POK2 belong to the kinesin-12 class which also includes the well-characterized group of phragmoplast-associated kinesins AtPAKRPs. Both kinesins are composed of an N-termil mo…
Wa8730a014g000540	AT3G19050	POK2		PHRAGMOPLAST ORIENTING KINESIN 2 is one of the two Arabidopsis homologs isolated in yeast two-hybrid screen for interaction partners of maize gene TANGLED1 (TAN1). Based on sequence homology in their motor domains, POK1 and POK2 belong to the kinesin-12 class which also includes the well-characterized group of phragmoplast-associated kinesins AtPAKRPs. Both kinesins are composed of an N-termil mo…
Wa8730a014g000810	AT3G50070	CYCD3
Wa8730a014g000810	AT4G37630	CYCD5
Wa8730a014g006060	AT1G18370	ATCK1		Encodes a kinesin HINKEL. Required for cytokinesis in pollen. Mutant has cytokinesis defects
Wa8730a014g007010	AT2G32710	ACK2, ICK7, KRP4		Kip-related protein (KRP) gene, encodes CDK (cyclin-dependent kinase) inhibitor (CKI). A member of seven KRP genes found in Arabidopsis thaliana. Negative regulator of cell division. Expressed in actively dividing cells.
Wa8730a014g007010	AT3G24810	ICK3, KRP5		Kip-related protein (KRP) gene, encodes CDK (cyclin-dependent kinase) inhibitor (CKI), negative regulator of cell division. A member of seven KRP genes found in Arabidopsis thaliana. Differential expression patterns for distinct KRPs were revealed by in situ hybridization.
Wa8730a015g002460	AT1G20930	CDKB2
Wa8730a015g002460	AT1G76540	CDKB2
Wa8730a015g004510	AT1G70210	ATCYCD1
Wa8730a015g004510	AT4G34160	CYCD3, CYCD3
Wa8730a015g005400	AT4G34160	CYCD3, CYCD3
Wa8730a015g005400	AT5G67260	CYCD3
Wa8730a016g000370	AT1G74560	NRP1		Double nrp1-1 nrp2-1 mutants show arrest of cell cycle progression at G2/M and disordered cellular organization occurred in root tips. Localize in the nucleus and can form homomeric and heteromeric protein complexes with NRP2. Bind histones Histone2A and Histone2B and associate with chromatin in vivo.
Wa8730a017g002430	AT5G42190	ASK2, SKP1B		Similar to SKP1 in yeast and humans which are involved in mitotic cell cycle control and ubiquitin mediated proteolysis.
Wa8730a017g002810	AT1G20610	CYCB2
Wa8730a017g002810	AT1G76310	CYCB2
Wa8730a017g002810	AT2G17620	CYCB2
Wa8730a017g002810	AT4G35620	CYCB2
Wa8730a017g004240	AT1G18370	ATCK1		Encodes a kinesin HINKEL. Required for cytokinesis in pollen. Mutant has cytokinesis defects
Wa8730a018g000640	AT2G37560	ATORC2, ORC2		Origin Recognition Complex subunit 2. Involved in the initiation of DNA replication. Regulated transcriptionally during cell cycle, peaking at G1/S-phase. Target of E2F/DF family of transcription factors. Interacts strongly with all ORC subunits.
Wa8730a018g002080	AT2G26760	CYCB1
Wa8730a018g002080	AT3G11520	CYC2, CYCB1
Wa8730a018g002610	AT3G17360	POK1		PHRAGMOPLAST ORIENTING KINESIN 1 is one of the two Arabidopsis homologs isolated in yeast two-hybrid screen for interaction partners of maize gene TANGLED1 (TAN1). Based on sequence homology in their motor domains, POK1 and POK2 belong to the kinesin-12 class which also includes the well-characterized group of phragmoplast-associated kinesins AtPAKRPs. Both kinesins are composed of an N-termil mo…
Wa8730a018g002670	AT3G17360	POK1		PHRAGMOPLAST ORIENTING KINESIN 1 is one of the two Arabidopsis homologs isolated in yeast two-hybrid screen for interaction partners of maize gene TANGLED1 (TAN1). Based on sequence homology in their motor domains, POK1 and POK2 belong to the kinesin-12 class which also includes the well-characterized group of phragmoplast-associated kinesins AtPAKRPs. Both kinesins are composed of an N-termil mo…
Wa8730a019g000630	AT5G02560	HTA12		Encodes HTA12, a histone H2A protein.
Wa8730a019g002730	AT1G08880	G-H2AX, GAMMA-H2AX, H2AXA, HTA5		Encodes HTA5, a histone H2A protein. H2AX is a meiosis-specific isoform of histone H2A. Upon DSB formation, rapid accumulation of phosphorylated H2AX (&#947
Wa8730a019g002730	AT1G54690	G-H2AX, GAMMA-H2AX, H2AXB, HTA3		Encodes HTA3, a histone H2A protein. H2AX is a meiosis-specific isoform of histone H2A. Upon DSB formation, rapid accumulation of phosphorylated H2AX (&#947
Wa8730a020g000590	AT4G39120	HISN7, IMPL2		Encodes a chloroplast-localized member of the myo-inositol monophosphatase family, IMPL2 (myo-Inositol monophosphatase like 2) that seems to have multiple enzymatic activities. It contributes to histidine biosynthesis based on it histidinol-phosphate phosphatase activity. In addition, the protein can act as an inositol monophosphatase and an L-galactose-1-phosphate phosphatase in vitro.
Wa8730a020g001330	AT3G23580	RNR2, RNR2A		Encodes one of the 3 ribonucleotide reductase (RNR) small subunit genes (RNR2A). Functionally redundant with the ribonucleotide reductase TSO2. mRNA was shown to specifically accumulate during the S-phase of the cell cycle in synchronized tobacco BY2 cells. Critical for cell cycle progression, DNA damage repair and plant development.

## Sheet: Circadian Genes
Dataset S11. Genes linked to the Circadian Clock and their Wolffia orthologues
Wolffia Gene	Arabidopsis Gene Name	Function
Wa8730a002g003810	RVE	Clock
Wa8730a014g006180	RVE	Clock
Wa8730a017g002130	LHY	Clock
Wa8730a011g002530	RVE1	Clock
Wa8730a007g007360	PRR3/5/7/9	Clock
Wa8730a009g001000	PRR3/5/7/9	Clock
Wa8730a013g002640	PRR3/5/7/9	Clock
Wa8730a003g007690	ZTL/FKF1/LKP2	Clock
Wa8730a015g001110	ZTL/FKF1/LKP2	Clock
Wa8730a010g000190	GI	Clock
Wa8730a004g004660	ELF3	Clock
Wa8730a010g001040	ELF3	Clock
Wa8730a018g003740	CRB	Clock
Wa8730a017g002170	PRR9 (mixed model)	Clock
Wa8730a018g000340	LUX	Clock
Wa8730a001g010670	WOX	Development
Wa8730a001g011280	WOX	Development
Wa8730a002g004840	WOX	Development
Wa8730a017g001030	DET1	Light
Wa8730a015g005190	COP1	Light
Wa8730a011g005140	SWI3B	Light
Wa8730a002g010390	CRY2	Light
Wa8730a016g001430	CRY1	Light
Wa8730a015g000560	CRY3	Light
Wa8730a009g004160	PIF3	Light
Wa8730a003g003810	PHY	Light
Wa8730a018g003910	PHY	Light
Wa8730a019g003290	PHY	Light
Wa8730a001g010550	PHOT	Light
Wa8730a011g005190	PHOT	Light
Wa8730a004g003520	HY5	Light
Wa8730a005g000270	HYH	Light
Wa8730a004g002060	SPA1	Light
Wa8730a001g010040	ALC/SPT/PIF	Light
Wa8730a006g001990	DDB	Light
Wa8730a006g002000	DDB	Light
Wa8730a006g002010	DDB	Light
Wa8730a001g007760	VIN	Temperature
Wa8730a009g007130	VIN	Temperature
Wa8730a020g003230	FRI	Temperature
