# Supplementary material for: Streamlined spatial and environmental expression signatures characterize the minimalist duckweedWolffia australiana
Source: HighWire-hosted journal article supplement (doi:10.1101/gr.279091.124), 2024-07-01
Supplement: Supplemental_Dataset_S12.xlsx [file Supplemental_Dataset_S12.xlsx]

## Sheet: Dataset_S12
Dataset S12. Genes referred to in the Manuscript and Their Wolffia Orthologues
Arabidopsis Genes	Wolffia Genes
CER3	Wa8730a011g004700	Wa8730a011g004580	Wa8730a011g004730	Wa8730a018g002300
CER8	Wa8730a001g000420
WRI4	Wa8730a015g001170
CASP5	Wa8730a006g005060
MYB41/49	Wa8730a001g004070
MYB60	Wa8730a012g005240
SBH2	Wa8730a012g005020
PIP1B	Wa8730a017g002540
IRT1	Wa8730a008g003840
YAB2	Wa8730a014g002860
LHC	Wa8730a004g004970	Wa8730a005g007220	Wa8730a017g003860	Wa8730a012g005370	Wa8730a006g005790	Wa8730a001g008310	Wa8730a009g005910	Wa8730a009g000670	Wa8730a007g005080
GASA	Wa8730a010g004740	Wa8730a010g004750	Wa8730a010g004730
P450	Wa8730a012g001430	Wa8730a019g001460
WRKY	Wa8730a001g007370	Wa8730a015g000740
ERF	Wa8730a004g000410	Wa8730a018g001290
WRKY60	Wa8730a011g005230
MYB36	Wa8730a011g003790
ABI1	Wa8730a010g000800
AHG3	Wa8730a001g011840	Wa8730a018g000270
CER	Wa8730a003g005260	Wa8730a016g003000	Wa8730a003g005060	Wa8730a003g006990	Wa8730a009g000590
KCS	Wa8730a014g005820	Wa8730a002g009950
MYB31	Wa8730a016g000240
CRINKLY4	Wa8730a010g004820
VLN2/3	Wa8730a009g001650
SWEET2/6	Wa8730a010g003680
KRATOS	Wa8730a002g009940
P450	Wa8730a001g009230	Wa8730a011g002460
bHLH134	Wa8730a016g000400
PRR5	Wa8730a013g002640
EPF2	Wa8730a016g000630
DOF4.7	Wa8730a003g000200
SLAC1	Wa8730a017g001630
MYB10	Wa8730a001g005050
LHY	Wa8730a017g002130
RVE	Wa8730a002g003810	Wa8730a014g006180
GI	Wa8730a010g000190
FKF1	Wa8730a003g007690	Wa8730a015g001110
PRR3/5/7/9	Wa8730a007g007360	Wa8730a009g001000
ZIP10	Wa8730a008g003780
IRT1	Wa8730a011g003030
RID1	Wa8730a005g008250
ABCG29	Wa8730a010g000100
4CL3	Wa8730a002g009150
FAD2	Wa8730a010g005400
WNK2	Wa8730a003g003640
MNB1	Wa8730a005g006050
ERP1	Wa8730a014g006180
4CL2	Wa8730a011g000940
